# Supplementary material for: Regulation of pectin remodeling and ectomycorrhiza development by cell wall localized proanthocyanidins in hybrid aspen roots
Source: Research Square preprint supplement (doi:10.21203/rs.3.rs-6966375/v1), 2025-07-04
Supplement: Supplementary file 1 [file 300bde9a39bead57502c1b6c.xlsx]

## Sheet: S2_UPLC-MS
Supplementary Table S2. Mass features detected in control roots (C) and ectomycorrizal (ECM) roots of P.tremula × P. tremuloides and Laccaria bicolor mycelia (F) samples by UPLC-MS/QTOF(ESI-). Samples were collected from control plants and plants with fungal contact after 3, 7, 14, 21 and 28 days. Unannotated mass features are named based on retention time and mass. Refers to Figure 1.
Sample ID											1	2	3	11	12	13	21	22	23	33	34	35	45	46	47	5	6	7	15	16	17	25	26	27	37	38	39	49	50	51	9	10	19	20	29	30	41	42	53
Sample description											3d_CONT_R1	3d_CONT_R2	3d_CONT_R3	7d_Cont_R1	7d_Cont_R2	7d_Cont_R3	14d_Cont_R1	14d_Cont_R2	14d_Cont_R3	21d_Cont_R1	21d_Cont_R2	21d_Cont_R3	28d_Cont_R1	28d_Cont_R2	28d_Cont_R3	3d_ECM_R1	3d_ECM_R2	3d_ECM_R3	7d_ECM_R1	7d_ECM_R2	7d_ECM_R3	14d_ECM_R1	14d_ECM_R2	14d_ECM_R3	21d_ECM_R1	21d_ECM_R2	21d_ECM_R3	28d_ECM_R1	28d_ECM_R1	28d_ECM_R1	3d_FLM_R1	3d_FLM_R2	7d_FLM_R1	7d_FLM_R2	14d_FLM_R1	14d_FLM_R2	21d_FLM_R1	21d_FLM_R2	28d_FLM_R1
Treatment, C=control, ECM=ectomycorrhiza, F=fungi											C	C	C	C	C	C	C	C	C	C	C	C	C	C	C	ECM	ECM	ECM	ECM	ECM	ECM	ECM	ECM	ECM	ECM	ECM	ECM	ECM	ECM	ECM	F	F	F	F	F	F	F	F	F
Time (day)											3	3	3	7	7	7	14	14	14	21	21	21	28	28	28	3	3	3	7	7	7	14	14	14	21	21	21	28	28	28	3	3	7	7	14	14	21	21	28
Mass feature	Metabolite group	Formula	Target mass	Measured mass	mDa difference	RT (min)	Hits all N=40	Hits Control N=15	Hits ECM N=15	Hits Fungi N=10
Tyrosine	Aromatic amino acid	C9H11NO3	181.074	181.074	-0.1	1.06	40	15	15	10	0.978865	0.77924	2.20827	1.18836	1.3672	1.75732	1.32562	1.55285	0.723054	1.37419	0.883182	0.573034	0.674544	1.06666	1.07906	3.18355	2.05448	1.40208	5.45652	4.97271	3.19827	3.38579	2.56023	3.36612	2.75632	2.31222	1.82541	0.836401	1.44274	1.04664	11.8633	11.5246	10.9017	12.6559	8.9631	6.8951	4.45783	8.29434	1.85009
Tryptophan	Trp/auxin metabolism	C11H12N2O2	204.09	204.09	-0.1	2.12	40	15	15	10	1.84623	1.59199	4.5597	1.75375	1.9319	2.90957	3.79992	6.91386	4.39253	7.7055	5.44866	1.60729	1.79811	1.80121	2.75274	3.09027	2.597	2.04118	10.1161	9.04829	4.69345	22.0069	8.60902	26.1637	22.1072	20.8572	13.1148	10.8017	10.5814	11.3355	5.87885	5.72175	7.04484	6.65383	5.6448	6.20422	2.0483	3.9866	0.524072
Tremuloidin 3 (FA)	Salicinoid	C21H24O10	436.137	436.136	1	3.97	39	15	15	9	0.414703	1.94755	0.723547	2.39412	1.37077	0.700747	2.05538	4.47598	0.6307	1.94075	0.232385	0.297484	0.411532	2.56321	0.53299	0.154228	0.286336	0.198862	0.334541	0.9764	0.343542	0.271802	0.788013	0.575688	0.0832391	0.472304	1.0026	0.15193	0.493479	0.151077	0.0966518	0.0830305	0.0807572	0.107849	0.101008	0.0601969	0.0793665	0.0717707
Tremuloidin 2	Salicinoid	C20H22O8	390.132	390.131	0.5	3.72	30	15	15	0	0.394049	0.511497	0.512045	0.54869	0.464532	0.264233	1.04485	0.564627	0.339785	0.407727	0.481059	0.215207	0.180659	0.29222	0.294116	0.168066	0.180491	0.141429	0.0918247	0.216784	0.11027	0.216836	0.132702	0.224911	0.0777046	0.123019	0.107788	0.114985	0.130932	0.305144
Tremuloidin 1 (FA)	Salicinoid	C21H24O10	436.137	436.135	2	3.38	29	15	14	0	0.447193	0.389243	0.54098	0.508745	0.559783	0.407221	0.818478	0.565578	0.455182	0.453329	0.490531	0.301566	0.404691	0.358066	0.328935	0.311637	0.390984	0.301	0.220181	0.314869	0.31119	0.25076		0.401345	0.253739	0.184958	0.27595	0.0951739	0.226572	0.17792
Tremuloidin 1	Salicinoid	C20H22O8	390.132	390.132	-0.5	3.38	30	15	15	0	0.368984	0.332637	0.405928	0.413538	0.427409	0.377802	0.502228	0.3452	0.380563	0.329758	0.402564	0.26327	0.276631	0.307357	0.345523	0.204396	0.278007	0.272833	0.179571	0.317681	0.18736	0.209046	0.161622	0.238083	0.145936	0.153299	0.217099	0.0908536	0.248509	0.207441
Tremulacin (FA)	Salicinoid	C28H30O13	574.169	574.167	1.6	4.37	40	15	15	10	1.04694	3.39625	2.27267	13.6648	2.73767	3.73543	5.78641	4.37518	3.24496	1.75543	0.865094	0.832428	0.85165	11.0983	1.18782	0.703814	0.810308	0.532576	0.7462	5.63236	1.36596	0.528239	24.2463	2.74782	0.608966	0.977507	1.83373	0.726867	3.27024	1.92401	0.217499	0.21326	0.187884	0.245592	0.202869	0.0816574	0.169522	0.175835	0.146563
Tremulacin	Salicinoid	C27H28O11	528.163	528.163	0.2	4.37	40	15	15	10	0.548739	1.72023	1.10018	6.93869	1.43053	1.94211	3.0737	2.22375	1.78595	0.988867	0.5023	0.42899	0.466639	5.17466	0.521785	0.371551	0.325089	0.256767	0.368415	2.71644	0.708438	0.222866	12.3127	1.37158	0.308223	0.513416	0.956162	0.37641	1.60676	0.933138	0.121064	0.112826	0.0949969	0.121526	0.088449	0.0491313	0.0686672	0.0916424	0.0718711
trans-Zeatin	Cytokinin	C10H13N5O	219.112	219.111	1	1.8	40	15	15	10	3.63282	1.78884	3.78192	3.85754	4.54921	2.19164	8.80387	6.51604	4.65821	5.77788	8.20165	3.95721	4.08443	3.94229	4.80468	3.34447	2.9033	2.12279	7.14066	5.30519	4.48488	5.58097	5.23606	7.4608	3.16538	3.2175	4.60034	3.19597	3.72595	5.23735	12.3842	11.2722	11.3627	9.57892	5.03741	6.87634	0.8296	2.93072	0.605269
Syringin 2	Sinapate derivative	C17H24O9	372.142	372.14	2	3.91	30	15	15	0	0.3511	0.280859	0.168774	0.470999	0.383515	0.141561	0.999084	0.361631	0.327429	0.818494	0.767497	0.251703	0.471844	0.542754	0.647475	0.15479	0.166881	0.122462	0.33651	0.186664	0.179534	0.185053	0.139737	0.188375	0.155882	0.161355	0.234373	0.0999419	0.180629	0.2384
Syringin 1	Sinapate derivative	C17H24O9	372.142	372.141	1	3.17	30	15	15	0	0.621947	0.755814	0.856425	0.918333	1.6549	0.213541	0.549182	0.721406	3.43463	1.01719	3.64272	0.226549	1.1369	0.304772	0.258885	1.26735	0.889168	0.439855	0.206187	0.445017	1.35898	0.895558	1.38012	0.697441	0.106855	0.327857	0.394306	0.189357	0.712361	0.476442
Succinic acid	Primary	C4H6O4	118.027	118.027	-0.4	0.92	40	15	15	10	5.10244	2.56916	4.61354	3.04091	3.93431	2.3897	6.67105	4.50669	2.94985	2.79955	3.4178	2.31368	3.73949	3.07372	3.27685	4.6094	4.8342	2.91683	9.3608	8.69103	7.57921	6.25224	7.38106	6.75077	6.26271	3.98194	4.86683	4.71614	4.4599	4.75077	5.07479	5.47766	5.10584	3.5399	5.99841	5.51161	3.14989	4.36278	1.14981
Sinapoyl alcohol	Sinapate derivative	C11H14O4	210.089	210.091	-1.8	4.59	40	15	15	10	0.159926	0.106115	0.275281	0.224342	0.170914	0.171009	0.243178	3.80617	0.148859	0.302514	0.362109	0.493772	0.31764	0.316281	0.220336	0.128225	0.142335	0.175254	0.326692	0.167868	0.124988	0.0800017	0.140231	0.320363	0.145213	0.144405	0.317045	0.116977	0.128142	0.0907401	0.278982	0.125046	0.0767667	0.230133	0.116547	0.110382	0.0713052	0.110153	0.123744
Shikimic acid	Phenolic	C7H10O5	174.053	174.053	-0.2	1.61	34	15	15	4	0.397079	0.341089	0.280576	0.331497	0.31205	0.355132	0.732658	0.378701	0.473007	0.355293	0.520833	0.34094	0.412391	0.530062	0.66021	0.266938	0.203073	0.186658	0.368432	0.423927	0.346506	0.356057	0.238155	0.375892	0.229751	0.229066	0.296401	0.351448	0.346264	0.368241	0.167428	0.192889	0.0795239					0.0730693
Salirepin 2	Phenolic glycoside	C13H18O8	302.1	302.1	0.2	2.32	30	15	15	0	1.15495	0.884172	0.460459	0.967824	1.08723	0.57803	1.88728	1.16808	1.17553	1.78587	1.7752	0.804199	1.06151	0.980181	1.4183	0.48976	0.552323	0.417534	0.42237	0.681975	0.462316	0.283945	0.286428	0.55185	0.141089	0.216137	0.211587	0.121592	0.0692609	0.261363
Salirepin 1 (FA)	Phenolic glycoside	C14H20O10	348.106	348.106	-0.3	1.57	30	15	15	0	1.55461	1.40446	1.73776	2.08308	1.9655	1.7269	3.06836	2.54564	1.80315	2.37879	2.1535	2.08491	1.86934	1.55818	1.87942	1.05548	1.08658	1.26267	1.64792	1.71501	1.02251	0.937964	1.06432	1.80237	1.05339	1.12223	1.31267	1.17438	0.991735	1.35173
Salirepin 1	Phenolic glycoside	C13H18O8	302.1	302.101	-0.8	1.58	30	15	15	0	2.70315	2.36618	2.97432	4.07986	3.42718	3.61867	4.99229	5.0747	3.09487	3.94018	4.84452	3.93484	4.00058	3.32501	3.0066	2.04181	2.16624	2.26995	3.0115	3.25649	2.42948	2.31902	2.1698	3.84258	2.34549	2.22807	2.70071	2.13191	2.11091	2.78617
Salicylic acid glucoside 3	SA derivative	C13H16O8	300.084	300.084	0.5	2.44	27	13	14	0	0.078264	0.308342			0.147755	0.112123	0.313876	0.312237	0.183622	0.15713	0.180475	0.0890089	0.153816	0.618447	0.283606	0.112366	0.370433	0.680399		0.447937	0.100248	0.486964	0.406588	0.0998803	0.0693371	0.293171	0.395331	0.567334	0.667936	1.05861
Salicylic acid glucoside 2	SA derivative	C13H16O8	300.084	300.085	-0.5	1.92	30	15	15	0	2.73044	1.38526	1.45683	2.68227	2.70215	1.81841	4.31296	3.47892	3.06615	4.88646	7.87465	3.53904	3.62828	2.78447	2.78425	1.13845	1.60002	1.41975	1.93972	2.67307	1.78609	1.6123	1.35146	2.34084	1.06551	1.18366	1.46455	1.38994	1.45386	1.59749
Salicylic acid glucoside 1 (FA)	SA derivative	C14H18O10	346.09	346.09	0	1.62	30	15	15	0	1.69298	1.16567	2.18595	1.18552	1.44077	0.873083	2.37992	1.62908	1.44093	1.30997	1.88919	0.744209	0.872747	0.814858	0.998917	0.795555	0.968562	0.927969	0.768852	1.2933	0.919841	0.919357	0.599324	1.08975	0.414089	0.367173	0.506756	0.448744	0.37495	0.664744
Salicylic acid glucoside 1	SA derivative	C13H16O8	300.084	300.085	-0.5	1.61	35	15	15	5	3.98066	2.87832	5.36146	2.79574	3.28579	1.80324	5.17904	3.87947	3.38481	2.96272	4.21883	1.86739	2.14432	2.00278	2.47317	1.82246	2.26081	2.02209	1.56904	2.97384	2.13479	2.09645	1.18881	2.37658	0.886975	0.858872	1.20876	1.02576	0.798133	1.41059	0.160467	0.124225	0.203221					0.0987742
Salicylic acid fragment 8	SA derivative	C7H6O3	138.032	138.032	-0.3	5.29	30	15	15	0	0.90176	0.607176	0.728845	0.686756	0.821617	0.462745	1.48673	1.20216	0.856448	1.07355	1.35483	0.497501	0.390485	0.5016	0.581053	0.561273	0.685518	0.661677	0.644541	0.66219	0.560494	0.452759	0.290948	0.952893	0.26226	0.244595	0.342938	0.316873	0.200339	0.260502
Salicylic acid fragment 7	SA derivative	C7H6O3	138.032	138.032	-0.3	4.7	30	15	15	0	1.33261	0.886096	1.02777	1.30874	1.08775	0.936701	0.976163	1.31063	0.995673	0.723328	1.07161	1.24369	1.0442	0.916134	1.03725	0.662525	0.88352	0.976697	1.02085	0.736333	0.691605	0.912929	0.599927	1.40869	0.659819	0.628062	0.847079	0.627236	0.424069	0.373886
Salicylic acid fragment 6	SA derivative	C7H6O3	138.032	138.032	-0.3	4.61	30	15	15	0	0.504413	0.679521	0.708739	0.420547	0.413338	0.311751	0.777874	0.332101	0.443393	0.406908	0.338209	0.483338	0.547354	0.835264	0.753385	0.516484	0.549271	0.518793	0.353	0.518337	0.357225	0.422232	0.477072	0.752806	0.362423	0.647997	0.511735	0.271808	0.362486	0.360171
Salicylic acid fragment 5	SA derivative	C7H6O3	138.032	138.032	-0.3	2.6	36	15	15	6	1.2035	0.939825	1.33203	1.14704	1.04765	1.43767	1.99252	1.23187	1.1423	1.19321	1.25111	0.727565	1.03906	1.13393	1.36964	0.621513	0.567272	0.644704	0.399891	0.840316	0.546392	0.667181	0.438834	0.867352	0.383666	0.579787	0.906555	0.326165	0.912113	0.936238	1.82159	1.4678	0.576974				0.187823	0.319698	0.241526
Salicylic acid fragment 4	SA derivative	C7H6O3	138.032	138.032	-0.3	2.45	40	15	15	10	11.2951	6.68695	8.83397	12.6552	8.90017	9.46914	8.07884	10.5299	8.139	6.13089	8.31995	12.1996	11.8303	10.9286	8.27113	7.82183	9.12721	7.57166	13.1226	8.73044	7.58489	7.11856	6.64562	9.33545	8.9182	7.76415	9.5079	8.09409	5.48706	4.87118	1.83511	1.47179	0.562347	0.547342	0.328278	0.316989	0.221413	0.298483	0.241434
Salicylic acid fragment 3	SA derivative	C7H6O3	138.032	138.032	-0.3	2.28	39	15	15	9	1.12709	0.969141	2.02325	1.53922	1.88427	1.08716	1.58956	2.12828	1.75607	0.869198	1.15117	1.02951	2.49147	1.33175	1.65864	0.886504	0.845022	0.617879	0.921766	1.03709	1.05861	1.14787	1.06739	1.70616	1.2661	1.6096	1.58967	1.7233	1.1823	1.44419	0.189961	0.0450845	0.0631953		0.309432	0.0868006	0.244654	0.352906	0.167617
Salicylic acid fragment 2	SA derivative	C7H6O3	138.032	138.032	-0.3	1.84	29	14	15	0	0.250261	0.129307	0.238707	0.242807	0.235585	0.417032	0.314265	0.208617	0.311546	0.175116	0.243195		0.318437	0.453521	0.501871	0.0890842	0.165603	0.14082	0.114368	0.119078	0.111199	0.138274	0.1217	0.123853	0.0818061	0.158306	0.183494	0.0946033	0.174567	0.127231
Salicylic acid fragment 1	SA derivative	C7H6O3	138.032	138.032	-0.3	1.62	34	15	15	4	2.61299	1.83275	3.69057	1.96869	2.24258	1.44295	3.4025	2.50927	2.16325	1.79839	2.67058	1.20877	1.27391	1.21947	1.66806	1.24981	1.49681	1.36895	1.20126	1.95821	1.45028	1.52158	0.886229	1.5496	0.598154	0.61662	0.785549	0.66442	0.605621	0.989468	0.0711561	0.0355187	0.0668291					0.0247063
Salicyl-HCH (Acylsaligenin)	Salicinoid	C14H14O5	262.084	262.084	0.1	1.84	30	15	15	0	0.758783	0.320179	0.544982	0.713226	0.468991	1.01975	0.892674	0.524796	0.693614	0.540805	0.634721	0.486248	0.710833	1.15013	1.12053	0.289245	0.404511	0.442131	0.23095	0.305594	0.319515	0.319752	0.228595	0.389814	0.277242	0.432054	0.510359	0.213774	0.314781	0.332329
Salicyl aldehyde/Benzoic acid 3	Salicinoid	C7H6O2	122.037	122.037	-0.2	2.86	40	15	15	10	1.8856	1.35402	2.16423	2.26943	2.09253	1.76611	1.53312	2.47305	1.12463	0.97736	1.64158	1.66898	2.25814	2.29525	2.01284	2.49644	2.48477	1.69515	4.00036	2.28578	2.28019	1.41282	1.62037	2.02512	2.02676	1.70819	1.76424	1.63015	1.41749	1.1629	1.00934	0.661071	0.462791	0.647821	1.70366	1.64866	1.3543	1.27351	0.569074
Salicyl aldehyde/Benzoic acid 2	Salicinoid	C7H6O2	122.037	122.037	-0.2	2.68	25	14	11	0	0.287266	0.247143	0.279576	0.161169	0.233074	0.116027	0.182269	0.819152	0.248708	0.265969	0.286752	0.586306	0.181391		0.154186	0.131194	0.138904	0.139066	0.137291	0.331997	0.371952	0.200919			0.148835		0.209236	0.111308		0.204528
Salicyl aldehyde/Benzoic acid 1	Salicinoid	C7H6O2	122.037	122.036	0.8	1.93	30	15	15	0	0.452593	0.204798	0.263425	0.555375	0.54657	0.386548	0.693573	0.481948	0.397747	0.496021	0.635521	0.558567	0.517115	0.360448	0.453441	0.203926	0.281138	0.23681	0.373546	0.352091	0.315003	0.277397	0.225537	0.272812	0.207577	0.221365	0.247474	0.190835	0.178976	0.239361
Salicyl alcohol	Salicinoid	C7H8O2	124.052	124.052	0.4	2.12	29	15	14	0	0.127272	0.611947	0.51863	0.270687	0.293478	0.402135	0.673468	0.644681	1.20431	0.480011	0.195287	0.116212	0.268493	0.557678	0.273852	0.0948553	0.11115	0.17744		0.591814	0.243051	0.131762	1.47118	0.687852	0.0969994	0.273091	0.413071	0.136466	0.289698	0.167729
Salicortin (FA)	Salicinoid	C21H26O12	470.142	470.142	0.4	3.38	40	15	15	10	4.77042	9.93862	16.7299	30.7878	6.02143	27.5182	16.4359	35.0986	34.959	6.61895	4.80021	1.14294	7.15255	17.7526	9.11631	4.77222	3.55488	3.07141	1.30218	17.0286	12.8326	2.67842	58.833	48.7216	2.04797	3.45759	3.44739	8.94978	13.105	11.7509	0.0905693	0.12936	0.0642237	0.157918	0.101044	0.0805198	0.108566	0.106875	0.0928627
Salicortin	Salicinoid	C20H24O10	424.137	424.137	0	3.38	36	15	15	6	1.83023	4.3224	7.2111	12.6856	2.69311	10.529	5.90314	12.7064	13.1777	2.92529	2.43312	0.726986	2.21461	7.27464	3.78812	1.70988	1.32674	1.15803	0.737474	7.28816	4.73511	1.23618	23.2053	18.8908	0.909581	1.38069	1.67235	3.71214	5.41543	4.31956		0.0440354	0.0374491	0.0574477	0.0400957	0.0318317		0.0535639
Salicin 2	Salicinoid	C13H18O7	286.105	286.105	0.3	2.41	30	15	15	0	2.44312	0.780846	0.755034	1.7381	1.72531	1.47973	1.7673	1.56092	2.68157	2.35703	2.83486	2.16507	3.20946	3.82275	2.08495	0.839376	1.02431	0.551877	0.912353	0.585132	1.02246	1.40532	4.5352	1.37886	1.03798	3.42399	3.69805	2.22448	1.74405	1.02144
Salicin 1 (FA)	Salicinoid	C14H20O9	332.111	332.111	-0.3	2.12	40	15	15	10	2.63499	10.2165	8.94862	5.19668	5.58993	7.43713	11.5138	11.4473	20.8933	8.71991	3.5497	2.17359	3.97612	9.6261	4.51841	2.03677	1.93821	2.49057	1.42747	9.52322	4.38899	2.03445	23.798	11.539	1.69104	4.71859	7.21699	2.39427	5.06435	3.08148	0.201084	0.185403	0.128698	0.20022	0.159411	0.0996074	0.112542	0.122581	0.0912502
Salicin 1	Salicinoid	C13H18O7	286.105	286.105	0.3	2.14	30	15	15	0	0.404831	0.560789	0.526585	0.533676	0.605142	0.601643	0.914802	0.853216	1.25725	0.747848	0.489631	0.524697	0.519234	0.677295	0.389755	0.275591	0.271294	0.274654	0.516951	0.595162	0.44397	0.230576	1.25426	0.739133	0.266354	0.385306	0.490968	0.190343	0.365307	0.220399
Quinic acid 2	Quinic acid derivative	C7H12O6	192.063	192.064	-0.6	2.71	30	15	15	0	0.962618	0.537547	2.37283	1.71928	0.470344	3.44711	3.23311	3.95545	2.25234	0.703554	0.556099	0.40474	1.90031	4.45535	3.67379	0.774069	0.319039	0.971031	0.289503	0.998905	0.578414	0.527222	0.333785	1.16339	0.468335	0.373565	1.8721	0.410878	0.382605	0.545947
Pyrogallol	Phenolic	C6H6O3	126.032	126.031	0.7	1.32	33	15	15	3	0.413589	0.198051	0.167894	0.442477	0.535927	0.474468	0.507193	0.420195	0.530184	0.558586	0.61354	0.373919	0.281625	0.202031	0.256016	0.219552	0.24393	0.158372	0.271214	0.19157	0.285434	0.203138	0.199197	0.26158	0.184534	0.433045	0.226349	0.160419	0.299758	0.495107	0.0860835	0.115971	0.0555898
Prodelphinidin trimer 7	PA	C45H38O19	882.201	882.199	1.7	2.71	30	15	15	0	1.11095	0.863841	0.679603	0.983808	0.780627	1.0802	0.767387	0.608617	0.94863	0.519723	1.0619	1.06904	0.700788	0.995913	0.79471	0.326737	0.523525	0.785856	0.268456	0.502219	0.51817	0.231298	0.319767	0.581281	0.217697	0.474487	0.639964	0.224544	0.357454	0.454075
Prodelphinidin trimer 6	PA	C45H38O19	882.201	882.199	1.7	2.42	30	15	15	0	1.73693	1.4586	1.37102	1.83942	1.4386	2.02702	2.13267	1.89051	1.73811	1.47386	1.60356	1.16101	1.34698	1.56381	1.50934	0.655034	0.676244	1.2631	0.358697	0.963278	0.681185	0.816783	0.624828	0.847002	0.531063	0.675607	1.2374	0.543571	0.792932	0.883785
Prodelphinidin trimer 5	PA	C45H38O19	882.201	882.199	1.7	2.24	30	15	15	0	3.1459	2.3413	2.89085	3.41063	1.60125	3.09988	4.73757	2.27022	3.71063	2.13078	2.49751	2.11672	2.42292	3.06648	2.82244	0.79798	1.10348	1.90369	0.664763	1.66131	1.34041	1.43629	0.720664	1.1358	0.934007	0.930741	1.79249	0.838763	1.76018	1.44674
Prodelphinidin trimer 4	PA	C45H38O21	914.191	914.189	1.6	1.81	29	15	14	0	0.629218	0.215702	0.326928	0.597589	0.347159	0.867001	0.626163	0.364407	0.506126	0.338724	0.420668	0.387159	0.560478	0.951508	0.943784	0.107126	0.182251	0.280374		0.14874	0.164046	0.109574	0.118419	0.101386	0.123223	0.224925	0.316659	0.0698029	0.151555	0.185898
Prodelphinidin trimer 3	PA	C45H38O20	898.196	898.194	1.6	2.08	30	15	15	0	2.32088	1.20213	1.62644	2.52147	1.65833	3.01557	2.714	1.67099	2.06658	1.48059	1.58395	1.66573	2.04899	2.67903	2.8554	0.678657	0.881427	1.42645	0.348676	0.856352	0.804879	0.615996	0.634291	0.653155	0.518368	0.769394	1.31214	0.497476	0.840569	0.768268
Prodelphinidin trimer 2	PA	C45H38O20	898.196	898.193	2.6	1.89	29	15	14	0	0.693374	0.444386	0.54008	0.92079	0.601869	0.97126	1.10731	0.628414	0.746559	0.62734	0.558004	0.618898	0.75484	1.19447	1.06412	0.280869	0.386066	0.537331		0.333622	0.424874	0.279407	0.156311	0.37166	0.258557	0.39129	0.531931	0.252503	0.412243	0.35726
Prodelphinidin trimer 1	PA	C45H38O19	882.201	882.199	1.7	1.52	30	15	15	0	0.903841	1.28444	0.933046	1.01637	0.759063	1.3492	1.41288	1.00487	1.19383	0.791725	0.899374	0.707547	0.782893	0.942013	0.749535	0.486005	0.560436	0.840615	0.234385	0.669738	0.514785	0.553342	0.54463	0.524732	0.353153	0.394891	0.695211	0.288258	0.533111	0.510523
Prodelphinidin dimer 9	PA	C30H26O13	594.137	594.136	1.3	2.83	30	15	15	0	2.36326	1.50328	1.80518	2.41442	1.84397	2.79839	3.00365	1.93167	1.96141	1.49382	1.90402	1.55493	1.93453	2.56467	2.61854	0.768661	1.03562	1.38094	0.575387	0.905704	0.949115	0.875717	0.796524	0.959798	0.617555	0.876933	1.30246	0.561841	1.02436	1.09692
Prodelphinidin dimer 8	PA	C30H26O13	594.137	594.136	1.3	2.35	14	7	7	0		0.436427	0.434707			0.678015		0.411361	0.464729	0.600661	0.523234					0.254984						0.258701		0.328464		0.177362	0.314741		0.262368	0.260746
Prodelphinidin dimer 7	PA	C30H26O14	610.132	610.131	1.3	2.33	30	15	15	0	0.892544	0.420407	0.67296	0.916845	0.525168	1.16097	1.04292	0.652352	0.792422	0.65128	0.633764	0.551265	0.854025	1.31937	1.26586	0.245961	0.354681	0.496334	0.19758	0.305922	0.376179	0.291942	0.210026	0.353045	0.256204	0.438671	0.538031	0.174089	0.348134	0.375527
Prodelphinidin dimer 6	PA	C30H26O13	594.137	594.136	1.3	2.04	30	15	15	0	1.39644	0.952185	1.06355	1.28704	0.920344	1.95457	1.70003	0.790724	1.43728	1.0632	1.08202	0.894648	1.04116	1.71356	1.60464	0.598087	0.750788	0.747699	0.365486	0.69792	0.802126	0.379256	0.534351	0.730299	0.459095	0.868273	1.02785	0.345491	0.829193	0.768781
Prodelphinidin dimer 5	PA	C30H26O13	594.137	594.135	2.3	2.04	19	9	10	0	1.22853	1.05789	0.843396	1.21608					1.26798		1.08419	0.297919	0.940227	1.75311		0.606756	0.744398	0.780001		0.70926			0.322204			0.895066	1.05042	0.309265	0.836312	0.873612
Prodelphinidin dimer 4	PA	C30H26O13	594.137	594.137	0.3	1.92	30	15	15	0	3.25477	2.24948	2.59796	3.68764	2.39504	4.17605	4.05858	2.48627	3.57525	2.54411	2.84264	2.22061	2.52989	3.8323	3.02077	1.44493	1.9234	2.30691	0.853729	1.81174	1.85225	1.3028	1.44644	1.72989	1.05067	1.67066	2.43916	0.913367	1.64628	1.72835
Prodelphinidin dimer 3	PA	C30H26O13	594.137	594.136	1.3	1.76	30	15	15	0	5.81359	4.94066	5.37711	6.46285	4.8492	6.64692	8.08624	5.51177	6.79412	4.51389	4.9118	4.4063	4.77103	6.50067	4.96609	2.57659	2.94322	4.88111	1.46131	3.20657	2.62118	2.52512	2.61735	2.82402	1.64875	2.19895	3.85655	1.73005	2.59575	2.94473
Prodelphinidin dimer 2	PA	C30H26O14	610.132	610.131	1.3	1.62	33	15	15	3	0.531485	0.303748	0.343474	0.728566	0.368576	1.20984	0.628263	0.286499	0.402136	0.468549	0.556226	0.252912	0.45007	1.36384	0.870099	0.218587	0.333778	0.181803	0.127623	0.145898	0.363875	0.163983	0.188778	0.243979	0.222214	0.784816	0.308543	0.115232	0.280147	0.302181	0.0289437		0.0483525		0.0455941
Prodelphinidin dimer 1 (A-type)	PA	C30H24O13	592.122	592.12	1.7	2.36	29	15	14	0	0.493184	0.880927	1.06354	0.609381	0.643289	0.778548	1.33489	0.902711	0.906795	0.829063	0.636874	0.339497	0.564417	0.573858	0.522342	0.337517	0.293328	0.484347		0.688036	0.320508	0.372319	0.294721	0.388156	0.167539	0.252118	0.426493	0.223366	0.447299	0.658955
Prodelphinidin dimer 1	PA	C30H26O14	610.132	610.131	1.3	1.5	35	15	15	5	1.68129	0.926634	1.26651	1.9762	1.11354	2.21777	1.91791	1.10645	1.59907	1.3034	1.18374	1.43354	1.61433	2.56062	2.21033	0.699966	0.881599	1.32805	0.382548	0.586608	0.760563	0.621659	0.555704	0.744904	0.422592	0.798708	1.00928	0.428018	0.686027	0.70839	0.100404	0.0297867	0.036589		0.0377861			0.0466323
Procyanidin trimer 5	PA	C45H38O18	866.206	866.204	1.8	2.97	30	15	15	0	1.74928	3.83408	5.90691	2.91208	2.66325	3.33319	7.64726	4.51207	4.18748	3.97747	3.75237	1.40247	3.83115	3.27657	2.91302	2.03901	1.39852	2.21113	0.752685	4.00083	1.43211	1.96659	1.35598	2.92612	1.19958	1.71785	2.43833	1.17332	3.65106	3.57408
Procyanidin trimer 4	PA	C45H38O18	866.206	866.204	1.8	2.65	30	15	15	0	1.37197	1.24556	2.21806	0.412126	0.966275	2.38959	2.24815	1.58954	1.61014	2.1897	0.638623	0.683373	1.19381	1.60355	1.48163	0.600448	0.439977	0.902139	0.277906	1.35758	0.621168	1.4415	0.557572	0.820066	0.246714	0.973021	1.01521	0.55228	1.38107	2.0812
Procyanidin trimer 3	PA	C45H38O18	866.206	866.205	0.8	2.58	30	15	15	0	4.52365	6.95642	11.4536	3.33368	3.99077	5.6363	11.2416	8.06846	7.32299	7.50478	4.34747	2.43418	3.97802	4.45699	3.4354	2.93841	2.10448	3.75183	1.1238	5.76571	2.17995	3.23397	2.03707	3.15612	1.273	2.25876	3.49346	1.90942	3.82242	5.49781
Procyanidin trimer 2	PA	C45H38O18	866.206	866.204	1.8	2.46	30	15	15	0	2.11792	2.85662	3.97502	1.73041	1.63772	2.56184	3.82606	2.30359	2.6626	2.55012	1.93956	0.876478	1.62441	1.83103	1.78257	1.15523	1.101	1.09524	0.524643	2.20191	1.01395	1.3376	0.930596	1.88751	0.696852	1.32152	1.19492	0.615952	2.20261	3.01208
Procyanidin trimer 1	PA	C45H38O18	866.206	866.204	1.8	1.68	30	15	15	0	1.72047	4.3465	4.89858	1.81896	1.77255	2.91121	4.72937	3.67641	3.41208	3.04501	2.4208	1.16361	1.93128	2.07487	1.54205	1.37166	1.15046	1.92152	0.586497	2.80938	1.08782	1.68217	1.24526	1.79112	0.725778	0.99797	1.52679	1.06081	1.71725	2.63394
Procyanidin tetramer 3	PA	C60H50O24	1154.27	1154.27	1.2	2.97	30	15	15	0	0.7626	2.21103	2.50868	1.13302	0.885487	1.25279	1.95555	1.61086	1.77353	1.91323	0.674187	0.279994	2.2096	0.918472	0.818167	0.188066	0.601113	0.671415	0.23699	1.27159	0.383665	0.650191	0.37611	0.439967	0.290847	0.593057	0.686294	0.493679	0.590967	0.831338
Procyanidin tetramer 2	PA	C60H50O24	1154.27	1154.27	2.2	2.6	30	15	15	0	1.57931	2.62546	4.83263	1.38065	1.79281	2.15708	4.73577	4.43979	3.13342	3.14539	2.65858	0.444188	1.57519	1.0686	1.45429	0.482345	0.51853	1.24	0.435086	1.52425	0.81149	0.59743	0.550663	0.688159	0.360874	0.895961	1.38262	0.350967	1.43675	1.52674
Procyanidin tetramer 1	PA	C60H50O24	1154.27	1154.27	2.2	2.25	30	15	15	0	0.542347	1.32183	1.47115	0.517077	0.826449	1.1953	2.21158	1.713	1.35738	1.40987	1.17222	0.39587	0.340652	0.737641	0.676105	0.309689	0.336774	0.586701	0.152876	1.11461	0.292089	0.67056	0.299679	0.344779	0.271358	0.348336	0.687357	0.427464	0.289424	1.00912
Procyanidin pentamer 2	PA	C75H62O30	1442.33	1442.33	1.6	2.77	30	15	15	0	1.35866	1.12044	5.24177	1.91871	1.3711	2.94085	5.26482	3.17382	3.27828	2.50554	2.43962	1.07581	1.52963	1.73638	1.63103	0.415181	0.422431	1.23224	0.0809442	2.10652	0.492654	0.580097	0.345053	0.514359	0.262047	0.401534	1.52516	0.49213	1.25089	1.44355
Procyanidin pentamer 1	PA	C75H62O30	1442.33	1442.33	0.6	2.7	29	15	14	0	0.196478	1.85758	1.26298	0.623192	0.377571	1.15208	2.18591	1.14052	0.937671	0.85641	0.899625	0.264976	0.619781	0.520812	0.767839	0.0983855	0.14893	0.558855		0.723548	0.160342	0.32617	0.106729	0.171616	0.110696	0.19439	0.655507	0.195346	0.19664	0.384017
Procyanidin dimer 4	PA	C30H26O12	578.142	578.142	0.4	3.1	30	15	15	0	2.77062	4.08731	6.32025	2.82558	2.54405	3.66612	5.67524	4.08783	4.49417	4.46446	3.37194	1.64931	2.78478	2.97696	2.72833	1.86143	1.3909	1.99627	0.786844	3.41566	1.50409	1.85684	1.15619	2.02315	0.81395	1.43317	2.28343	1.05328	2.43122	2.83219
Procyanidin dimer 3	PA	C30H26O12	578.142	578.141	1.4	2.91	29	15	14	0	0.985525	1.16936	2.16651	1.23023	0.803628	1.40926	1.87077	1.43564	1.55297	1.59834	1.16	0.527579	0.844499	0.894815	0.966577	0.585224	0.521121	0.520102	0.276997	0.986343	0.526306	0.656879		0.700139	0.382865	0.722531	0.715871	0.322712	1.03424	1.53325
Procyanidin dimer 2	PA	C30H26O12	578.142	578.141	1.4	2.81	30	15	15	0	0.901954	0.411571	0.342243	1.17878	0.201125	1.04673	2.45475	0.562652	0.783053	0.261223	0.445571	0.448364	0.948372	0.268994	0.734387	0.114801	0.499197	0.200567	0.268427	0.222372	0.267498	0.104758	0.422711	0.714903	0.214501	0.641605	1.12741	0.112654	1.00227	0.483752
Procyanidin dimer 1 (A-type)	PA	C30H24O12	576.127	576.125	1.8	2.35	30	15	15	0	0.940234	1.61702	2.0851	1.10068	0.984468	1.33462	2.18191	2.17286	1.72129	1.83916	1.62707	0.623889	1.22689	1.06723	0.895276	0.653675	0.565139	0.852853	0.36089	1.09137	0.635297	0.843767	0.522317	0.992928	0.325573	0.539935	0.956486	0.47545	0.879374	1.12616
Procyanidin dimer 1	PA	C30H26O12	578.142	578.142	0.4	2.36	30	15	15	0	25.7505	41.1216	53.6492	27.0766	23.9907	35.883	60.1726	45.9407	45.0312	41.6678	33.4607	16.1205	25.436	27.2515	10.247	17.8758	14.507	22.8649	7.09659	31.3694	14.9054	20.1023	14.0129	21.5065	8.87898	5.68979	21.7316	11.5557	9.78108	33.9431
Pinobanksin/Naringenin	Flavonoid	C15H12O5	272.068	272.068	0.5	3.62	30	15	15	0	0.299608	0.249214	0.216445	0.302039	0.402267	0.223905	0.518652	0.273694	0.312516	0.290963	0.396367	0.238226	0.23901	0.248432	0.309526	0.165229	0.187904	0.165795	0.133285	0.260124	0.145694	0.149037	0.126746	0.258971	0.0710293	0.105945	0.0942349	0.0960652	0.15291	0.264426
Phenylalanine fragment 3		C9H11NO2	165.079	165.079	0	3.25	40	15	15	10	0.188402	0.125632	0.159185	0.205792	0.272213	0.151181	0.314191	0.221838	0.191774	0.17589	0.239542	0.197325	0.188214	0.186592	0.262947	0.0888202	0.119786	0.111737	0.228637	0.138331	0.130391	0.135654	0.143606	0.163164	0.152868	0.135184	0.106922	0.0790685	0.115783	0.220446	0.471205	0.472632	0.51368	0.5079	0.26105	0.252927	0.167791	0.282449	0.139996
Phenylalanine fragment 2		C9H11NO2	165.079	165.079	0	3.12	40	15	15	10	0.196109	0.113223	0.159828	0.287086	0.248351	0.136564	0.0948236	0.0604583	0.287047	0.0803239	0.0894189	0.129521	0.245087	0.138045	0.2496	0.073097	0.151447	0.177988	0.156288	0.09919	0.0842546	0.188561	0.148663	0.188649	0.147327	0.146708	0.12505	0.133356	0.110949	0.0921225	0.467922	0.470688	0.509807	0.513416	0.261154	0.246545	0.151067	0.281426	0.139996
Phenylalanine fragment 1		C9H11NO2	165.079	165.079	0	2.99	40	15	15	10	0.197335	0.218793	0.200416	0.288069	0.28448	0.166544	0.42559	0.29361	0.287741	0.277539	0.379274	0.199566	0.245087	0.250351	0.307366	0.114994	0.151399	0.177988	0.17944	0.197266	0.159459	0.183029	0.189131	0.208493	0.117896	0.124236	0.154381	0.112293	0.192466	0.249164	0.467265	0.460248	0.510376	0.513416	0.2671	0.248058	0.151067	0.069607	0.139996
Phenylalanine	Aromatic amino acid	C9H11NO2	165.079	165.079	0	1.59	40	15	15	10	0.887449	0.691445	1.11181	1.00632	0.918862	1.32587	1.25798	1.41915	1.04583	2.22191	0.969804	0.62437	0.6571	0.637282	0.859504	2.50983	1.50375	0.955715	5.69361	4.7276	3.26873	4.91268	3.72478	5.95672	5.58772	4.82312	3.48686	2.04686	1.9024	1.88322	13.9862	14.5486	13.3767	14.3009	11.6162	11.0034	5.62934	10.5325	3.05222
Phenol fragment 7	Phenolic	C6H6O	94.0419	94.042	-0.1	5.29	30	15	15	0	2.19134	1.60609	1.70806	2.0404	1.99568	1.41191	3.80897	3.18524	2.04365	2.63178	3.01421	1.59922	1.20221	1.31265	1.97636	1.3292	1.79486	1.63657	1.62959	1.64927	1.27824	1.15515	0.937751	2.04738	0.900786	0.856724	0.855207	0.883271	0.531583	0.66965
Phenol fragment 6	Phenolic	C6H6O	94.0419	94.042	-0.1	4.7	30	15	15	0	0.989665	0.558489	0.793747	0.977205	0.753838	1.01377	0.823206	1.01716	0.686047	0.542538	0.832056	0.938787	0.782297	0.818106	0.686733	0.593295	0.694752	0.613128	0.770443	0.558177	0.607202	0.677155	0.430464	1.12993	0.616761	0.454543	0.621756	0.422705	0.322329	0.295755
Phenol fragment 5	Phenolic	C6H6O	94.0419	94.042	-0.1	4.61	30	15	15	0	0.424714	0.563954	0.580787	0.383083	0.35641	0.245962	0.63735	0.338405	0.36187	0.379845	0.391269	0.416571	0.434373	0.7177	0.656121	0.468924	0.482526	0.425631	0.320587	0.439726	0.358452	0.351342	0.343235	0.553677	0.281043	0.453719	0.393449	0.236453	0.306032	0.312475
Phenol fragment 4	Phenolic	C6H6O	94.0419	94.042	-0.1	3.38	10	6	4	0			0.351594	0.691737		0.676636		0.855889	0.861934					0.426988						0.406606	0.346019		1.23865	1.10596
Phenol fragment 3	Phenolic	C6H6O	94.0419	94.042	-0.1	2.82	29	11	15	3	0.267623	0.188523		0.463735	0.449285	0.346914		0.444549	0.464193	0.478496	0.723714	0.470791	0.426137			0.183632	0.339947	0.173879	0.394609	0.422226	0.253472	0.428758	0.389859	0.414314	0.457147	0.5095	0.523322	0.242086	0.372653	0.289051	0.0428705	0.0499062	0.0368829
Phenol fragment 2	Phenolic	C6H6O	94.0419	94.042	-0.1	2.45	40	15	15	10	11.1941	6.94158	9.04207	13.5455	9.16255	10.228	8.28733	11.4713	8.44833	6.72011	8.69108	12.7586	12.5568	11.2022	9.46695	8.25758	9.45176	7.87708	13.73	8.95647	8.36837	7.53923	6.80768	9.24704	9.20779	7.61462	10.0112	8.22363	5.53402	5.17046	1.96872	1.60236	0.588361	0.5448	0.380649	0.308047	0.213486	0.29761	0.232781
Phenol fragment 1	Phenolic	C6H6O	94.0419	94.042	-0.1	2.12	29	15	14	0	0.179769	0.927028	0.748709	0.446617	0.59622	0.657698	1.03466	1.1468	1.91387	0.758433	0.344672	0.173168	0.321558	0.93576	0.493831	0.19837	0.144009	0.26445		0.853268	0.441911	0.198846	2.19309	1.07669	0.162694	0.45275	0.633325	0.197544	0.494098	0.302696
OH-Tremuloidin-like 2	Salicinoid	C20H22O9	406.126	406.127	-0.6	3.8	30	15	15	0	0.159316	0.618107	0.585682	0.180754	0.427335	0.407651	1.23474	0.613312	0.528593	0.51376	0.468078	0.189851	0.288104	1.32395	0.349374	0.18054	0.189868	0.31463	0.230538	0.569533	0.377443	0.323977	0.35922	0.364282	0.117535	0.238473	0.114271	0.267272	0.800935	0.927762
OH-Tremuloidin-like 1 (FA)	Salicinoid	C21H24O11	452.132	452.132	-0.1	2.02	28	13	15	0	0.36873	0.334297	0.430166	0.561668	0.55196	0.328698	0.784006	0.575324	0.53674	0.587527	0.641135			0.436621	0.412307	0.206735	0.286333	0.258937	0.201571	0.442252	0.26243	0.267634	0.207557	0.325779	0.19856	0.341246	0.413094	0.206991	0.231582	0.368214
OH-Tremuloidin 1 (FA)	Salicinoid	C21H24O11	452.132	452.13	1.9	3.71	27	14	13	0	0.40949	1.43041	0.981917	0.50059	1.58233	1.28295	1.44882	1.36689	1.82793	0.528383	0.258242		0.312918	7.63118	0.598075	0.287052	0.382287	0.190669		1.82908	0.703606		4.74794	0.909762	0.17903	0.695365	1.17909	0.155391	1.21427	1.30406
OH-Tremuloidin 1	Salicinoid	C20H22O9	406.126	406.126	0.4	3.71	30	15	15	0	0.181383	0.361363	0.244764	0.203824	0.407726	0.395618	0.483045	0.413865	0.531973	0.191908	0.143633	0.123188	0.158472	1.87147	0.168413	0.112911	0.169403	0.0615692	0.180209	0.515084	0.255376	0.297022	1.33502	0.504625	0.252725	0.32014	0.385851	0.23225	0.433378	0.609661
N6-isopentenyladenosine	Cytokinin	C15H21N5O4	335.159	335.161	-1.3	6.45	19	6	12	2		0.301022	0.775096					1.0367		0.271451	0.364413	0.277441				0.353261	0.192384	0.287059				0.20449	0.316319	0.235957	0.345261	0.355462	0.406289	0.36613	0.310557	0.273222			0.156181						0.194533
Mevalonic acid 2	MVA	C6H12O4	148.074	148.073	0.6	1.52	40	15	15	10	0.156836	0.126901	0.195073	0.32718	0.299091	0.104842	0.931861	0.149398	0.227874	0.345883	0.459591	0.237727	0.556107	0.690496	0.324228	0.186957	0.212846	0.136376	0.170496	0.110177	0.308861	0.0990492	0.585915	0.206338	0.205877	0.170457	0.213729	0.259182	0.5777	0.404485	0.282189	0.250469	0.202513	0.17939	0.0714426	0.0483346	0.0843414	0.0809591	0.255275
Mevalonic acid 1	MVA	C6H12O4	148.074	148.073	0.6	1.41	40	15	15	10	0.246512	0.565101	0.278273	0.260237	0.243342	0.131658	0.430515	0.39466	0.34239	0.3266	0.443214	0.224136	0.275582	0.183713	0.304818	0.222908	0.466861	0.23206	0.150007	0.190848	0.132408	0.093942	0.0936724	0.0633891	0.122489	0.0476714	0.119927	0.143136	0.134257	0.239101	0.168416	0.129785	0.095913	0.0760584	0.0793866	0.0793286	0.0633556	0.0661944	0.0549677
Malate	Primary	C4H6O5	134.022	134.022	-0.5	0.77	24	12	5	7	0.874579	2.08162	1.0929	0.542395	1.22429		1.23791		0.549981	0.5197		0.609435	1.06821	0.829564	0.98924	0.899583	1.29374	0.432198	0.641548	0.671683											0.425462	0.407771	3.49315	0.158944	0.147519	0.028854		0.135909
Isopropylmalate-like 4		C7H12O5	176.069	176.069	-0.5	2.18	32	15	14	3	0.651447	0.347418	0.355821	0.682141	0.953701	0.606878	1.28968	1.31832	1.05504	1.70664	1.89872	0.689933	0.945799	0.87571	1.33989	0.488329	0.546264	0.324244	0.700147	0.459254	0.625547	0.434068	0.287545	0.612602	0.372828	0.297755	0.378641	0.120103	0.216338		0.113405	0.152432	0.0363033
Isopropylmalate-like 3		C7H12O5	176.069	176.068	0.5	2	36	15	15	6	2.65035	1.37446	1.07949	3.75417	5.11544	2.77327	7.46983	6.55209	5.6209	8.92577	10.4208	5.63062	6.63167	4.77731	6.53629	1.37289	1.91687	0.963191	2.92117	1.89666	2.68294	1.99266	1.56644	2.90395	2.01239	1.51662	2.16336	1.39514	1.94527	1.91054	0.172975	0.200722	0.0632909			0.0568461		0.0355401
Isopropylmalate-like 2		C7H12O5	176.069	176.068	0.5	2.5	33	15	14	4	0.381138	0.324151	0.402163	0.223637	0.295702	0.17271	1.02072	0.402744	0.459732	0.564375	0.588591	0.537162	0.939927	0.645965	1.07601	0.463379	0.527077	0.646717	0.353302		0.276842	0.260261	1.11042	0.394486	0.474032	0.536445	2.19595	1.39183	0.790756	10.8358	0.0770632	0.107984	0.0478638			0.0426699
Isopropylmalate-like 1		C7H12O5	176.069	176.068	0.5	1.75	36	15	15	6	0.786475	0.647102	0.531501	0.721295	1.0907	0.592475	1.15578	1.0817	0.802965	0.862948	1.25266	0.681195	0.600318	0.561392	0.717683	0.470231	0.57303	0.415943	0.594433	0.596464	0.579897	0.446649	0.487745	0.599678	0.370276	0.445188	0.437226	0.29448	0.411076	0.445753	0.305117	0.424161	0.207591	0.299744					0.0953711
Indole-3-acetonitrile	Trp/auxin metabolism	C10H8N2	156.069	156.069	-0.2	2.12	21	3	12	7							0.129207	0.0815813	0.112194										0.131416	0.118025	0.0757819	0.542071	0.164703	0.661702	0.384177	0.3992	0.222593	0.154928	0.169962	0.220553	0.0808027		0.0948694	0.0958937	0.0575187	0.0714524	0.032171	0.0433308
Indole-3-acetic acid	Trp/auxin metabolism	C10H9NO2	175.063	175.063	0.1	3.33	13	0	9	4																						0.126046	0.113186	0.124881	0.248828	0.112279	0.0942916	0.140769	0.090844	0.0674868					0.0676536	0.0595057	0.0781266	0.0902197
Hypoxanthine-like		C5H4N4O	136.038	136.038	0.5	2.81	30	15	15	0	1.38605	0.816212	1.34929	1.08578	0.91765	0.867055	1.49434	0.912835	0.604226	0.422689	0.743434	0.350306	0.501513	1.02761	0.721546	0.713216	0.651413	0.866543	0.727737	0.512469	0.38825	0.4485	0.311763	0.393867	0.286886	0.296182	0.258765	0.143237	0.176894	0.274969
Hydroxytryptophan	Trp/auxin metabolism	C11H12N2O3	220.085	220.084	0.8	1.3	22	0	13	9																0.117365			0.319925	0.216973	0.163716	0.362871	0.289111	0.423815	0.260946	0.263921	0.205174	0.156188	0.200608	0.153997	0.474086	0.45021	0.574013	0.645498	0.95338	0.725143	0.368945	0.741675
Hydroxycinnamic acid/Coniferoyl aldehyde 2	Coniferyl alcohol derivative	C10H10O3	178.063	178.062	1	3.6	30	15	15	0	0.615558	0.386036	0.563076	0.584509	0.510692	0.445552	0.56981	0.573789	0.409944	0.393392	0.475768	0.381065	0.547979	0.569636	0.516628	0.408399	0.482027	0.429653	0.536024	0.316735	0.362836	0.325117	0.312659	0.642165	0.336972	0.314173	0.361922	0.307601	0.23795	0.223267
Hydroxycinnamic acid/Coniferoyl aldehyde 1	Coniferyl alcohol derivative	C10H10O3	178.063	178.063	0	2.7	30	15	15	0	1.0036	0.590686	0.731072	0.870352	0.797352	0.697605	1.26082	1.02963	0.902221	0.738096	1.01046	0.669189	0.718026	0.717823	0.581523	0.429235	0.394933	0.569302	0.444454	0.487168	0.376078	0.514064	0.445329	0.703855	0.324045	0.419065	0.678251	0.494783	0.254585	0.369556
Homogentisic acid/Hydroxymethoxybenzoic acid glucoside 4	Phenolic glycoside	C14H18O9	330.095	330.095	0.1	3.09	30	15	15	0	4.98863	5.11401	7.57357	5.13011	5.64471	3.68455	11.4583	6.5888	6.20842	10.2948	8.99564	4.96927	5.47625	6.67392	7.59577	2.94786	3.34234	2.97088	2.6153	3.37356	3.11832	3.82215	2.35117	5.49631	1.50725	2.49709	3.0047	1.62176	5.30832	4.72498
Homogentisic acid/Hydroxymethoxybenzoic acid glucoside 3	Phenolic glycoside	C14H18O9	330.095	330.094	1.1	2.86	30	15	15	0	0.967001	0.6785	0.41067	2.18228	1.81248	1.47011	2.89	1.80495	1.9057	2.0738	3.28769	2.9414	2.4436	1.99461	1.46949	0.420642	0.482442	0.406973	0.643955	0.492391	0.715135	0.365752	0.351707	0.582788	0.263883	0.342951	0.544615	0.434711	0.285768	0.333065
Homogentisic acid/Hydroxymethoxybenzoic acid glucoside 2 (FA)	Phenolic glycoside	C15H20O11	376.101	376.099	1.6	1.89	30	15	15	0	0.457553	0.465907	0.604301	0.561106	0.62032	0.410511	1.01884	0.734825	0.594726	0.633752	0.684275	0.411356	0.565899	0.542626	0.613574	0.331166	0.284136	0.307115	0.313463	0.40838	0.33438	0.319869	0.318629	0.490369	0.214149	0.248289	0.303651	0.259246	0.355308	0.533908
Homogentisic acid/Hydroxymethoxybenzoic acid glucoside 2	Phenolic glycoside	C14H18O9	330.095	330.095	0.1	1.89	30	15	15	0	6.71463	6.36029	9.44201	8.24496	9.78425	6.01988	14.204	11.3308	8.12461	8.88936	10.9221	6.12479	8.20639	7.88445	8.9398	4.53779	4.8793	4.22868	4.69166	6.1625	5.29606	5.38274	4.16721	6.81094	3.13709	3.63836	4.22148	3.57056	5.1034	7.76822
Homogentisic acid/Hydroxymethoxybenzoic acid glucoside 1	Phenolic glycoside	C14H18O9	330.095	330.095	0.1	1.47	31	13	14	4	0.441347	0.311767	0.397527	0.612382			0.979357	0.839518	0.699886	0.736846	1.09639	0.564758	0.539554	0.529217	0.602605	0.239351	0.339366	0.256478		0.442065	0.324644	0.465421	0.357233	0.473979	0.359314	0.340508	0.426937	0.270857	0.286896	0.48417					0.219408	0.40657	0.489859	0.307275
Homogentisic acid/Hydroxymethoxybenzoic acid fragment 3	Phenolic	C8H8O4	168.042	168.043	-0.7	2.61	33	11	15	7		0.424852	0.61203	0.590066		0.567946	0.718714	0.582326	0.536773	0.521698	0.511648	0.360771			0.641003	0.421511	0.330241	0.248503	0.381547	0.481967	0.321724	0.383862	0.40238	0.687883	0.432939	0.444657	0.493313	0.346613	0.458261	0.48085	0.0988236	0.0693759	0.0822003		0.273438	0.323702	0.271956
Homogentisic acid/Hydroxymethoxybenzoic acid fragment 2	Phenolic	C8H8O4	168.042	168.042	0.3	1.89	30	15	15	0	1.3177	1.21525	1.76612	1.52391	1.86952	1.11838	2.66161	1.98208	1.5955	1.5578	2.05587	1.13866	1.55579	1.87252	1.63403	0.824788	1.01453	0.824897	0.873456	1.16157	0.888659	0.946851	0.84996	1.33509	0.614398	0.699026	0.823372	0.717991	0.962206	1.50792
Homogentisic acid/Hydroxymethoxybenzoic acid fragment 1	Phenolic	C8H8O4	168.042	168.042	0.3	1.51	24	15	9	0	0.852471	0.154595	0.501137	0.242436	0.486703	0.175936	1.08527	0.160891	0.336633	0.244261	0.263621	0.324978	0.873358	0.899952	1.34465	0.105604	0.156816	0.132397					0.173807			0.147772	0.298405	0.182536	0.720305	0.159957
HCH-Salicortin (FA)	Salicinoid	C28H32O15	608.174	608.173	1.1	3.87	30	15	15	0	1.70791	1.37448	1.52815	2.15516	4.0358	9.61358	6.74705	13.4756	16.3133	3.01839	1.13708	0.154765	1.72384	11.8765	4.28578	1.24473	1.33135	0.354282	0.173564	5.1222	3.15157	0.312601	26.1671	10.466	0.742209	1.05786	1.02482	2.32547	3.69599	3.4473
HCH-Salicortin	Salicinoid	C27H30O13	562.169	562.168	0.6	3.87	28	14	14	0	0.355577	0.304276	0.386668	0.429979	0.849439	2.3184	1.67798	2.7572	3.79064	0.856056	0.301953		0.394009	2.48367	0.889592	0.293508	0.363289	0.0800784		1.23813	0.756583	0.0896061	6.06958	2.3233	0.150561	0.250457	0.312653	0.474818	0.835635	0.799902
Grandidentatin 1	Salicinoid	C21H28O9	424.173	424.174	-0.7	3.97	34	15	15	4	0.373467	0.588873	0.84193	4.39061	0.939708	0.520393	2.01177	2.6793	0.79883	0.494999	0.404024	0.116739	0.2697	3.79679	0.761253	0.25193	0.25141	0.249198	0.153767	0.675593	0.192866	0.20237	12.5666	0.398286	0.133253	0.681632	0.809794	0.0952496	0.65964	0.587071	0.0486341	0.0669701	0.0707411			0.0851706
Glutathione (GSSG)	Primary	C20H32N6O12S2	612.152	612.151	1	1.24	40	15	15	10	6.9987	5.95704	9.15373	6.81958	7.24045	5.04438	9.03415	4.95498	3.68699	4.54455	6.11128	4.33108	5.18665	6.31545	6.94669	11.3421	12.9943	7.81139	13.325	9.40956	7.78724	3.69455	4.79046	5.75012	3.29959	3.45668	4.6752	2.69751	4.28962	3.67649	40.7829	34.0468	22.5968	22.0996	12.741	15.7616	4.39009	7.59281	1.24024
Glutathione (GSH)	Primary	C10H17N3O6S	307.084	307.083	0.8	0.68	34	15	9	10	1.28168	0.594018	0.623013	0.531565	0.364055	0.482099	0.954911	0.120698	0.292452	0.144468	0.324989	0.287338	0.623617	0.263527	0.8453	0.266587	0.900766	0.723435		0.145057	0.0514103						0.307428	0.0987382	0.353468	0.332524	30.9199	25.4132	16.1917	44.9976	1.20997	2.20634	0.271489	0.46058	3.81542
Galloyl glucose	Phenolic glycoside	C13H16O10	332.074	332.074	0.4	1.59	30	15	15	0	1.86496	5.20213	6.17216	5.81859	4.23884	5.50711	10.733	8.73557	12.764	6.04221	4.67839	1.5833	3.23548	11.3641	7.39548	2.39772	2.41911	2.67565	1.03924	6.77157	3.62766	3.71795	8.81801	6.02425	1.46342	4.4109	4.8413	3.65411	10.3909	14.8623
Gallic acid	Phenolic	C7H6O5	170.022	170.021	0.5	1.34	30	15	15	0	0.375932	0.193985	0.2737	0.332023	0.310995	0.210591	0.455025	0.330004	0.348507	0.204175	0.274427	0.194571	0.368248	0.269017	0.257081	0.198893	0.208872	0.207055	0.1771	0.177389	0.211761	0.20326	0.180669	0.212281	0.180684	0.172911	0.208594	0.21763	0.19955	0.270227
Epigallocatechin 2	PA	C15H14O7	306.074	306.075	-1	2.61	34	15	15	4	0.322103	0.233167	0.398949	0.151381	0.272551	0.329299	0.720415	0.416953	0.373372	0.336028	0.349079	0.290306	0.295504	0.233191	0.285363	0.178387	0.133651	0.158733	0.326544	0.333747	0.20302	0.340464	0.0682923	0.356475	0.190995	0.237411	0.273104	0.180569	0.229219	0.339733					0.0938921	0.100381	0.0784686	0.0643656
Epigallocatechin 1	PA	C15H14O7	306.074	306.074	0	2.46	30	15	15	0	1.83482	0.676628	1.22496	1.59692	1.22806	1.78794	1.9228	1.24559	1.52924	1.12291	1.13021	1.2071	1.38189	1.8238	1.57169	0.54052	0.777846	0.879648	0.516375	0.601431	0.620539	0.660613	0.430449	0.784784	0.445661	0.604409	0.954085	0.461921	0.372327	0.550231
dinor-12-oxo-phytodienoic acid	Jasmonate	C18H28O3	292.204	292.204	-0.2	5.67	34	13	14	7	0.171337	0.0938687	0.259366	0.0891557	0.097715		0.549321	0.129006	0.196174	0.242829	0.150967	0.173599	0.39001	0.427536	0.546095	0.195635	0.125307	0.160139	0.14006	0.180301	0.108459	0.0608139	0.158668	0.128734	0.0696805	0.138014	0.120624	0.137077	0.339659	0.116564	0.252591	0.18598	0.190218		0.142346	0.0928429		0.0514322
Dihydroxybenzoic acid 4	Phenolic	C7H6O4	154.027	154.026	0.6	3.16	30	15	15	0	0.392654	0.156408	0.355763	0.373532	0.379861	0.20478	0.385792	0.364079	0.399343	0.173748	0.219356	0.275987	0.665702	0.476013	0.793149	0.190015	0.236423	0.125937	0.189611	0.114758	0.157592	0.136556	0.221879	0.285717	0.120282	0.223374	0.273171	0.214187	0.310372	0.220298
Dihydroxybenzoic acid 3	Phenolic	C7H6O4	154.027	154.026	0.6	1.83	40	15	15	10	9.14471	2.20292	6.5054	2.97725	5.21074	1.43134	8.8542	2.57896	3.49273	3.17724	2.87629	3.91267	6.60226	7.45118	7.19672	2.68938	2.52654	2.66947	1.05117	1.39916	1.32832	0.933908	2.00779	1.74548	1.11236	1.94876	3.07587	2.13763	8.83434	2.46167	0.259711	0.152605	0.081471	0.130557	0.223103	0.178801	0.221053	0.208355	0.0819799
Dihydroxybenzoic acid 2	Phenolic	C7H6O4	154.027	154.027	-0.4	1.67	30	15	15	0	3.31463	2.1227	3.68148	3.58011	3.44231	2.52171	2.87395	3.37999	3.32493	2.09994	2.48758	2.25401	4.00182	3.11507	3.69463	2.30203	2.26338	2.13784	2.20676	1.87124	2.30044	1.97727	1.58603	2.54077	2.14804	2.10606	2.68508	2.49547	1.50988	2.3856
Dihydroxybenzoic acid 1	Phenolic	C7H6O4	154.027	154.027	-0.4	1.51	30	15	15	0	5.77554	1.11631	3.43601	1.7395	4.00361	1.3878	7.44312	1.35071	2.46045	1.89556	1.98489	2.20147	6.2828	6.62945	10.0891	0.754029	1.45179	0.904822	0.206195	0.15625	0.627222	0.320448	1.23199	0.56372	0.274428	1.11331	2.09824	1.56588	5.44287	1.1539
Dihydrophaseic acid		C15H22O5	282.147	282.146	0.7	3.48	35	10	15	10	0.287288			0.346978	0.136474		0.519918		0.191514	0.771477		0.430952	0.544182	0.462312	0.289936	0.632381	0.444172	0.300525	0.688522	0.496528	0.48402	0.580081	0.65288	1.02996	0.959558	1.49948	0.992601	0.923399	0.812655	0.493643	4.69912	4.7339	11.4409	9.90547	4.97655	5.45119	4.29674	4.90689	2.35296
Deoxystrigol-like 2	Strigolactone	C19H22O5	330.147	330.146	0.9	3.48	30	15	15	0	0.234124	0.189638	0.184158	0.339114	0.282256	0.200084	0.532546	0.303045	0.285443	0.3866	0.415348	0.7319	0.268013	0.319801	0.476	0.353579	0.123737	0.125327	0.492765	0.498381	0.142348	0.0944939	0.36022	0.269011	0.122051	0.0964732	0.105937	0.343348	0.0782628	1.19802
Deoxystrigol-like 1	Strigolactone	C19H22O5	330.147	330.146	0.7	3.36	30	15	15	0	0.652769	0.382714	0.444949	0.568955	0.648454	0.411622	0.883276	0.511759	0.56588	0.540283	0.561332	0.707658	0.736214	0.547719	1.10012	0.336209	0.407345	0.305918	0.528184	0.49023	0.367649	0.369402	0.321888	0.513153	0.204797	0.464777	0.379607	0.345078	0.576422	1.11236
Deoxyhexopyranose 3		C6H12O5	164.069	164.068	0.5	3.36	30	15	15	0	1.1359	0.657968	0.582026	1.06147	0.726221	0.528727	1.07662	0.803959	0.553647	0.696125	1.0629	0.835744	0.502939	0.475048	0.630828	0.435801	0.553138	0.397563	0.810558	0.240026	0.380511	0.368421	0.377576	0.317262	0.387158	0.509082	0.39446	0.450524	0.273916	0.3084
Deoxyhexopyranose 2		C6H12O5	164.069	164.067	1.5	3.29	30	15	15	0	1.1643	0.67103	0.625785	0.939718	1.10252	0.921101	1.06697	1.00567	0.712058	0.714641	1.04738	1.02147	0.841349	0.661222	0.848876	0.593204	0.82937	0.760125	1.26823	0.398877	0.583203	0.581157	0.55086	0.670707	0.648014	0.636286	0.655458	0.458866	0.36585	0.231753
Deoxyhexopyranose 1		C6H12O5	164.069	164.069	-0.5	0.53	40	15	15	10	12.898	7.77641	9.5245	10.7177	10.0312	8.91317	9.95622	10.9958	7.99647	8.62399	10.5691	10.1322	6.23871	4.58471	6.18436	8.02329	10.0753	9.10001	14.5023	9.18863	8.53479	10.0986	5.9676	11.9308	9.91243	7.85415	9.20927	6.24538	4.84483	3.39698	1.11808	1.01693	0.904304	1.19807	0.314803	0.285884	0.19959	0.330513	0.304326
Dehydroquercetin 3	Flavonoid	C15H12O7	304.058	304.06	-1.7	1.85	30	15	15	0	0.893819	0.38137	0.573022	0.864123	0.609255	1.09121	0.919006	0.659408	0.736812	0.633268	0.520639	0.592403	0.837102	1.18314	1.21221	0.376229	0.422048	0.51663	0.232562	0.307607	0.372439	0.353109	0.293677	0.473106	0.2654	0.444387	0.547488	0.248114	0.433096	0.391046
Dehydroquercetin 2	Flavonoid	C15H12O7	304.058	304.059	-0.7	2.98	29	15	11	3	0.417612	0.101227	0.142092	0.204888	0.189045	0.51489	0.4168	0.269775	0.378489	0.481934	0.285261	0.158796	0.305547	0.514501	0.69756	0.117429	0.134692	0.0919109	0.121234	0.125181	0.118118	0.139279		0.0865067	0.0703212	0.134752	0.164355				0.0389485	0.0429243	0.0328943
Dehydroquercetin 1	Flavonoid	C15H12O7	304.058	304.058	0.3	2.61	30	15	15	0	0.977275	0.868667	1.57034	0.985622	0.874492	0.974246	1.7677	1.30179	1.2259	1.28891	1.11262	0.566847	1.00786	0.921377	0.882133	0.566808	0.5331	0.624466	0.303366	0.799808	0.480859	0.732548	0.457426	0.869247	0.385775	0.559289	0.790176	0.36268	0.79058	0.940589
Coumaroyl quinic acid	Quinic acid derivative	C16H18O8	338.1	338.101	-0.8	3.05	26	15	11	0	0.223621	0.0852305	0.387538	0.228944	0.14229	0.428237	0.660945	0.690292	0.337044	0.0651263	0.115892	0.0539376	0.225032	1.07809	0.615419	0.0822622	0.0698931	0.0911903		0.188586	0.112499	0.0833743		0.115919		0.0565958	0.208443		0.101497	0.0888212
Coumarin 2	Phenolic	C9H6O2	146.037	146.037	-0.2	3.36	30	15	15	0	1.00158	0.269026	0.229864	0.545761	0.371989	0.317336	0.449213	0.504752	0.341364	0.339077	0.558045	0.642967	0.295423	0.19507	0.261437	0.242523	0.387028	0.330172	0.554612	0.346598	0.346273	0.246988	0.242187	0.169248	0.23842	0.364029	0.278546	0.178845	0.0994883	0.134193
Coumarin 1	Phenolic	C9H6O2	146.037	146.037	-0.2	3.29	30	15	15	0	0.428712	0.280943	0.159822	0.544451	0.184925	0.306823	0.338933	0.359198	0.276855	0.256898	0.349284	0.516299	0.200376	0.130578	0.264924	0.211931	0.294439	0.277555	0.6889	0.15007	0.355564	0.208187	0.158331	0.212236	0.245869	0.174976	0.186982	0.0867679	0.102279	0.0908422
Coumaric acid glucoside 5	Phenolic glycoside	C15H18O8	326.1	326.099	1.2	3.04	30	15	15	0	0.720782	0.922499	0.938202	0.858157	0.812794	0.629403	1.03752	0.810229	0.593024	0.654179	0.891595	0.748231	0.463162	0.486977	0.877451	0.672489	0.68806	0.547298	0.583619	0.717718	0.646528	0.855418	0.696382	0.83889	0.656221	0.599521	0.666218	0.46972	0.261184	0.523183
Coumaric acid glucoside 4	Phenolic glycoside	C15H18O8	326.1	326.099	1.2	2.95	30	15	15	0	1.44181	1.0482	0.437341	1.33204	0.705721	0.676117	1.03453	0.950035	0.629222	0.861502	1.04436	0.853895	0.572192	0.363296	1.17435	0.230534	0.560506	0.426598	0.424875	0.990669	0.408004	0.538423	0.367082	0.609541	0.945019	0.35855	0.597735	0.485084	0.19131	0.42948
Coumaric acid glucoside 3 (FA)	Phenolic glycoside	C16H20O10	372.106	372.106	-0.3	2.91	29	15	14	0	0.11841	0.0891856	0.0859738	0.289909	0.256687	0.186824	0.708276	0.367978	0.413784	0.544989	0.653644	0.621347	0.600716	0.417126	0.527722		0.118489	0.0660847	0.12981	0.159532	0.141155	0.176112	0.155947	0.202745	0.146515	0.110742	0.185545	0.19508	0.173896	0.232091
Coumaric acid glucoside 3	Phenolic glycoside	C15H18O8	326.1	326.1	0.2	2.91	30	15	15	0	1.35364	1.04126	0.435789	0.834191	0.698738	0.676117	1.25968	0.66461	0.526599	0.65785	1.04652	0.71547	0.572192	0.363296	1.17435	0.228893	0.378067	0.426252	0.612773	0.944222	0.0772648	0.305193	0.366095	0.592196	0.97466	0.452346	0.4088	0.42245	0.19131	0.424832
Coumaric acid glucoside 2 (FA)	Phenolic glycoside	C16H20O10	372.106	372.106	-0.3	2.71	30	15	15	0	0.329266	0.327344	0.467313	0.307277	0.313123	0.117828	0.59554	0.255908	0.310912	0.363225	0.344833	0.16767	0.276103	0.261152	0.401892	0.179906	0.178523	0.190751	0.168101	0.216987	0.135765	0.230298	0.169087	0.256301	0.0839295	0.123121	0.144746	0.10596	0.347031	0.304684
Coumaric acid glucoside 2	Phenolic glycoside	C15H18O8	326.1	326.1	0.2	2.72	30	15	15	0	1.58349	1.48663	1.37937	1.59863	1.87081	0.89471	2.71609	1.92256	1.49302	1.13905	2.13451	0.833825	2.43612	1.45767	1.46499	0.888459	0.752666	1.04951	0.615686	1.54509	0.824102	2.23588	0.828894	1.15873	1.68543	1.58097	1.92992	1.46129	0.876485	1.19332
Coumaric acid glucoside 1	Phenolic glycoside	C15H18O8	326.1	326.1	0.2	2.64	30	15	15	0	1.68207	0.873436	0.644091	1.36605	1.67367	1.6351	1.6618	1.73255	1.23254	1.66531	2.03371	2.79509	2.43618	0.713285	1.47364	0.71524	1.21633	0.98943	2.30089	0.469957	0.87393	2.23735	0.937056	1.40725	1.68398	1.54687	1.93417	1.47107	0.574099	0.680954
Coumaric acid 3	Phenolic	C9H8O3	164.047	164.046	1.3	3.41	35	11	14	10	0.0594684		0.100052		0.133899	0.0843236	0.0974397	0.109063	0.0918037	0.0538142	0.0732702			0.0854269	0.116754	0.161872		0.155002	0.275859	0.234308	0.119642	0.206845	0.207493	0.0869924	0.290264	0.272357	0.684677	0.242723	0.224461	0.312812	0.725654	0.584022	1.2816	0.829891	0.635124	0.400998	0.879312	0.812737	0.486688
Coumaric acid 2	Phenolic	C9H8O3	164.047	164.047	0.3	2.96	30	15	15	0	0.382524	0.101085	0.175083	1.04556	0.205894	0.25533	0.236887	0.313061	0.264183	0.290033	0.308447	0.161651	0.256157	0.117166	0.217299	1.0551	0.216417	1.36646	0.290645	0.167387	0.133505	0.157537	0.186668	0.125088	0.0706716	0.132121	0.152562	0.202294	0.0864806	0.184314
Coumaric acid 1	Phenolic	C9H8O3	164.047	164.048	-0.7	2.83	30	15	15	0	2.2569	0.873268	1.62871	1.11922	1.38792	1.10451	1.43821	1.27534	0.818973	0.542493	0.921597	0.415788	0.721125	1.5566	0.796221	1.0197	0.855248	1.52415	1.17551	0.730872	0.632129	0.717839	0.540281	0.462755	0.384844	0.518752	0.410469	0.290388	0.292636	0.443129
Coniferin	Coniferyl alcohol derivative	C16H22O8	342.132	342.13	1.5	3.58	30	15	15	0	0.422231	0.708055	0.50833	0.257292	0.347418	0.168328	1.39226	0.541428	0.752311	0.667478	0.876261	0.190315	0.273259	0.207378	0.444308	0.147288	0.302873	0.21868	0.232187	0.314867	0.160683	0.18424	0.15805	0.455061	0.104976	0.0682129	0.125201	0.0867481	0.21887	0.347852
Citric acid	Primary	C6H8O7	192.027	192.027	0	0.73	40	15	15	10	330.979	201.111	246.951	208.558	234.308	158.658	303.458	118.77	143.859	99.7379	133.572	108.932	172.706	218.344	227.717	159.317	216.886	113.413	85.8573	132.813	69.3615	31.0064	60.9993	28.2	47.1263	42.822	46.2577	52.6575	98.1298	50.9773	49.7536	49.324	19.9217	11.6324	13.127	24.4657	4.0208	10.5952	1.60468
cis-12-oxo-phytodienoic acid	Jasmonate	C18H28O3	292.204	292.203	0.8	5.91	37	15	15	7	1.02069	0.670503	0.89082	0.522184	0.48361	0.560582	0.781271	0.0943367	0.427862	0.873519	0.507444	0.407264	0.329234	0.671261	0.583673	0.876579	1.00538	0.311525	0.651446	0.977979	0.356455	0.237596	0.317931	0.409976	0.271102	0.524828	0.197623	0.11283	0.226124	0.165755	0.157296	0.174406	0.147261		0.117243	0.0945706		0.0521003
Cinnamoyl glucose 2	Phenolic glycoside	C15H18O7	310.105	310.105	0.3	3.36	30	15	15	0	2.70678	1.74868	1.38183	2.69703	2.05892	1.27218	2.7932	1.77109	1.46252	1.89261	2.68029	2.21725	1.09274	1.38122	1.34868	0.644327	1.59137	0.972343	1.84016	0.511496	0.735424	0.504334	0.946722	0.829154	1.08989	1.4689	1.06688	1.25377	0.614728	0.899131
Cinnamoyl glucose 1	Phenolic glycoside	C15H18O7	310.105	310.106	-0.7	3.29	30	15	15	0	3.33588	1.77924	1.28417	1.71742	2.5646	2.19462	2.14935	2.27696	1.44955	1.58349	2.56847	2.40982	1.45169	1.20279	1.67136	1.59873	2.59652	2.11671	3.17584	0.799138	1.37903	1.38808	1.35824	1.49139	1.81599	1.67632	1.58689	1.2043	0.88198	0.690233
Cinnamic acid 3	Phenolic	C9H8O2	148.052	148.052	0.4	3.73	30	15	15	0	0.510432	0.289063	0.29857	0.434284	0.418128	0.343641	0.549923	0.496458	0.408608	0.454639	0.435056	0.287205	0.334247	0.384478	0.388972	0.195366	0.322729	0.254944	0.348311	0.25688	0.282824	0.258264	0.171671	0.503185	0.22189	0.155953	0.286577	0.17876	0.223581	0.21097
Cinnamic acid 2	Phenolic	C9H8O2	148.052	148.052	0.4	2.47	30	15	15	0	0.417278	0.472933	0.520597	0.531851	0.615777	0.525651	1.23389	0.529647	0.631128	0.58171	0.70938	0.655056	0.708921	0.571729	0.564667	0.369967	0.317977	0.627601	0.347797	0.484831	0.297032	0.376393	0.332581	0.525235	0.300423	0.488393	0.43489	0.291894	0.330486	0.344966
Cinnamic acid 1	Phenolic	C9H8O2	148.052	148.053	-0.6	1.58	40	15	15	10	14.3593	11.919	11.0082	15.0528	16.4916	12.4221	32.4902	17.8864	14.7901	25.2565	21.2484	19.2401	20.5182	26.5634	44.1856	7.36454	9.13385	5.65126	10.985	7.70902	7.59889	10.8341	9.3889	9.68038	9.79593	13.4259	10.0872	8.88708	22.0472	24.7192	0.651884	0.658707	0.567434	0.641209	0.515533	0.506206	0.262743	0.504279	0.142406
Catechol/Hydroquinone 4	Phenolic	C6H6O2	110.037	110.036	0.8	2.61	29	15	14	0	0.231243	0.193648	0.350999	0.24848	0.172722	0.269878	0.39226	0.256155	0.246669	0.302259	0.20285	0.147686	0.205304	0.226936	0.240433	0.116636	0.124794	0.14183		0.172072	0.127518	0.128741	0.234023	0.146221	0.114707	0.1239	0.176626	0.0835343	0.168067	0.200068
Catechol/Hydroquinone 3	Phenolic	C6H6O2	110.037	110.036	0.8	2.31	30	15	15	0	1.31761	0.277695	0.556352	1.98644	0.537323	0.221329	0.655547	0.38889	0.60122	0.209602	0.413588	0.136783	0.32404	0.328551	0.590893	0.351649	0.266304	0.229354	0.202307	0.244561	0.239253	0.227463	7.68968	0.51593	0.0967745	0.0860637	0.56625	0.0836687	0.252834	0.236117
Catechol/Hydroquinone 2	Phenolic	C6H6O2	110.037	110.036	0.8	2.07	28	15	13	0	0.106016	0.538205	0.640788	0.272428	0.435752	0.417034	0.47063	0.452543	1.38987	0.404551	0.138209	0.366046	0.375993	0.671632	0.357992	0.086985	0.16809	0.111347		0.326786	0.225046		0.343185	0.764096	0.104432	0.127223	0.265006	0.207169	0.642133	0.256884
Catechol/Hydroquinone 1	Phenolic	C6H6O2	110.037	110.037	-0.2	1.86	37	15	15	7	0.441795	0.321573	0.410038	0.552103	0.437713	0.587796	0.798183	0.721187	0.753309	0.746435	0.659654	0.447082	0.673353	0.687611	0.68694	0.325434	0.272218	0.306707	0.289938	0.274768	0.300212	0.335217	0.265448	0.390141	0.274453	0.400934	0.36156	0.379579	0.380178	0.456662	0.121269	0.0722029	0.0430485	0.0644368	0.113946	0.0598662	0.0615617
Catechin(+)	PA	C15H14O6	290.079	290.079	0	2.6	40	15	15	10	128.285	109.326	201.958	131.1	108.192	151.904	231.257	165.276	144.07	152.682	145.389	83.2628	116.017	143.547	143.24	68.5174	60.1967	76.9691	41.3026	99.7051	61.0392	73.8769	51.9479	91.1629	43.8845	68.9705	100.051	43.7812	96.9264	109.15	0.0545791	0.114859	0.0963847	0.292237	0.142253	0.0606637	0.0928232	0.488728	0.20823
Catechin(-)	PA	C15H14O6	290.079	290.079	0	2.99	30	15	15	0	2.98831	2.06507	4.63781	2.97933	2.68629	2.88577	4.45732	3.91846	3.24499	3.0981	3.03297	1.64465	2.20945	2.59294	2.7506	1.61456	1.20934	1.41196	0.966208	1.83311	1.18844	1.40414	1.17624	1.69572	0.732713	1.31159	2.30351	0.778377	1.37788	1.97931
Caffeoylshikimate	Phenolic	C16H16O8	336.084	336.085	-0.5	3.12	30	15	15	0	3.2566	3.5625	4.97408	3.72069	4.31152	2.90377	6.82916	3.94103	3.2202	2.91885	3.90643	2.02189	3.3199	6.75234	5.60746	2.33289	1.79957	2.00421	1.33068	2.734	1.90315	1.88569	1.52854	1.58369	1.12883	1.88211	1.25865	0.885467	2.77844	3.02973
Caffeoyl salicin	Salicinoid	C22H24O10	448.137	448.139	-2	3.76	40	15	15	10	0.691853	0.73448	0.974389	0.965033	0.851845	0.896313	0.762296	0.910115	0.521519	0.7221	0.953315	2.17193	1.3281	1.28772	1.35692	0.697033	0.813825	0.677232	1.26785	0.930341	0.69537	0.426578	0.648433	0.895175	0.595743	0.578192	0.609205	0.668518	0.587984	0.420533	0.407323	0.50913	0.380242	0.860074	0.45347	0.397994	0.4626	0.437911	0.575828
Caffeoyl quinic acid	Quinic acid derivative	C16H18O9	354.095	354.095	0.1	2.71	34	15	15	4	1.11552	0.642213	2.63167	2.29933	0.547612	4.40305	3.92443	5.03044	2.65107	0.917262	0.69143	0.554425	2.57431	5.41389	4.65998	0.994719	0.388963	1.24343	0.356233	1.08768	0.86853	0.66887	0.403669	1.38038	0.582411	0.444127	2.22698	0.476408	0.485021	0.691563	0.0529545	0.0589777		0.112701					0.059581
Caffeoyl glucose 3	Phenolic glycoside	C15H18O9	342.095	342.095	0.1	2.94	30	15	15	0	0.737818	0.92269	0.906614	1.43047	0.917603	0.588582	2.33671	1.07982	0.855747	1.12186	1.53004	0.878165	0.651316	0.734942	0.750979	0.476437	0.560675	0.425263	0.513531	0.687375	0.412499	0.42921	0.475748	0.5058	0.280778	0.447622	0.345178	0.500155	0.256274	0.689173
Caffeoyl glucose 2	Phenolic glycoside	C15H18O9	342.095	342.095	0.1	2.67	30	15	15	0	3.82408	3.41654	3.22119	3.63036	4.53946	3.11926	5.75825	4.35725	3.82531	3.99332	4.28654	2.9692	2.76621	2.63475	2.64498	2.65241	2.92179	3.05646	2.67093	3.61568	2.59748	2.63377	2.22974	3.43569	1.77929	1.96742	2.10537	1.31581	1.54157	2.25161
Caffeoyl glucose 1	Phenolic glycoside	C15H18O9	342.095	342.096	-0.9	2.18	40	15	15	10	0.473458	1.06065	1.02161	1.34984	1.51857	0.406384	0.619818	0.518643	0.416331	1.38244	0.56915	0.384551	1.01808	1.09703	1.23838	1.67033	1.80917	1.3176	2.53938	1.51934	1.46438	0.344661	0.260119	2.07202	0.303342	0.314612	0.30824	0.883192	1.0501	0.354214	1.97607	1.90644	1.17264	1.10994	1.91435	1.92822	0.739458	1.61606	0.262759
Benzyl-HCH fragment	Phenolic	C14H14O4	246.089	246.089	0.2	2.6	30	15	15	0	3.19398	2.78252	4.98422	3.48811	2.73134	3.96761	5.79366	4.47821	3.71243	4.09256	3.63904	2.15716	2.97777	3.58178	3.70527	1.91083	1.63523	2.02156	1.09446	2.60733	1.67383	1.98142	1.37067	2.36774	1.16095	1.74896	2.52548	1.13627	2.41417	2.69638
Benzyl salicylate 2	SA derivative	C14H12O3	228.079	228.079	-0.4	3.72	29	15	14	0	0.239329	0.286926	0.257426	0.227541	0.218432	0.147318	0.585903	0.21298	0.216817	0.217864	0.296807	0.131095	0.155046	0.203053	0.169496	0.099473	0.0928748	0.0843742		0.150686	0.0924988	0.109125	0.0807033	0.0892038	0.0570926	0.0614296	0.0802845	0.0745365	0.0534263	0.171224
Benzyl salicylate 1	SA derivative	C14H12O3	228.079	228.079	-0.4	3.38	30	15	15	0	0.286643	0.305655	0.353455	0.262435	0.33076	0.292927	0.379144	0.318145	0.281444	0.227612	0.252619	0.203031	0.246508	0.249895	0.275359	0.177002	0.183226	0.252096	0.164634	0.255815	0.177162	0.18306	0.122391	0.217939	0.115971	0.124772	0.17175	0.0940744	0.167585	0.171029
Arbutin/hydroquinone glucoside-like (FA)	Phenolic glycoside	C13H18O9	318.095	318.094	1.1	1.7	30	15	15	0	1.46862	1.8236	1.51445	1.91108	1.69172	1.60935	3.1901	2.20572	2.19613	2.43297	2.50546	2.26375	1.23308	1.47831	1.16952	1.01582	0.871025	1.48892	1.03373	1.48646	1.14153	1.35994	1.30608	1.23961	0.925415	1.04895	1.43322	1.03509	0.909003	1.19952
Arbutin/hydroquinone glucoside-like	Phenolic glycoside	C12H16O7	272.09	272.09	-0.4	2.31	30	15	15	0	1.7051	0.400771	0.70874	2.51268	0.760675	0.314512	0.784899	0.524994	0.79479	0.278663	0.530575	0.235518	0.406938	0.486569	0.688582	0.472495	0.327411	0.346849	0.286552	0.393274	0.305478	0.33086	9.93526	0.701431	0.157311	0.183782	0.679252	0.105261	0.336427	0.308148
Arbutin/hydroquinone glucoside (FA)	Phenolic glycoside	C13H18O9	318.095	318.095	0.1	1.22	30	15	15	0	2.3524	1.70109	1.64554	2.63153	2.88356	2.43174	3.00906	2.2083	2.06279	2.34793	2.7669	2.75997	2.46452	2.33234	2.46207	1.85257	2.29463	1.95977	2.64117	2.38247	3.265	4.07618	6.43802	4.38372	3.62237	13.6951	5.27555	4.92243	10.3207	32.4468
Arbutin/hydroquinone glucoside	Phenolic glycoside	C12H16O7	272.09	272.089	0.6	1.22	30	15	15	0	0.592667	0.433177	0.397676	0.736095	0.638718	0.669023	0.68211	0.511152	0.461782	0.613848	0.71535	0.693384	0.69163	0.58628	0.618615	0.519599	0.737659	0.595574	0.738069	0.678505	0.906671	1.10509	1.76726	1.26499	1.03789	3.97983	1.44297	1.4113	3.0051	9.45754
Anthranilic acid	Trp/auxin metabolism	C7H7NO2	137.048	137.048	0.1	1.66	33	15	15	3	5.46773	1.76022	1.00897	5.87867	8.42609	3.33015	9.7987	6.66935	6.88137	6.73409	9.53226	7.16414	6.35281	3.91732	4.00063	0.125746	3.38696	1.79346	4.51504	2.44709	2.52711	2.95052	2.16045	3.37643	2.33266	2.14799	2.52929	1.35917	1.6208	1.61874	0.0716762	0.0608924	0.0506341
Aconitate 2 (cis or trans)	Primary	C6H6O6	174.016	174.017	-0.6	0.73	38	15	15	8	4.81304	3.24329	4.84054	2.5136	3.59953	2.1515	5.25128	2.12381	2.29186	1.48543	2.4326	1.32191	3.00678	3.40833	3.08047	1.97114	2.9903	1.6055	1.28956	1.58818	1.06941	0.639243	1.20406	0.583441	0.592527	0.787384	0.502971	0.801551	1.46557	1.10108	0.460148	0.563122	0.253594	0.19346	0.189906	0.301169		0.150473
Aconitate 1 (cis or trans)	Primary	C6H6O6	174.016	174.016	0.4	0.83	38	15	15	8	1.62361	0.721005	0.845824	0.567605	1.09265	0.663751	2.16766	0.533307	0.951544	0.489954	0.560318	0.414869	0.648347	3.52531	0.800036	0.623742	0.780566	0.444462	0.293865	0.438896	0.435739	0.228213	0.332749	0.150961	0.220577	0.256654	0.254097	0.298601	0.322569	0.470982	0.806029	0.886362	0.368635	0.162887	0.0967293	0.242716		0.0870236
Acetyl-salicin 2 (2’ or 6’) (FA)	Salicinoid	C16H22O10	374.121	374.121	0.3	2	30	15	15	0	0.73859	0.612411	0.631785	0.81359	0.936828	0.815741	1.39775	1.5222	1.08642	1.25491	1.49978	0.846242	0.893944	0.699092	0.832127	0.459382	0.495846	0.502889	0.557312	0.654832	0.526527	0.619875	0.383439	0.685243	0.452145	0.493901	0.634132	0.390963	0.414017	0.592732
Acetyl-salicin (2’ or 6’)	Salicinoid	C15H20O8	328.116	328.116	-0.2	2.47	30	15	15	0	4.19402	4.94912	5.94533	3.8209	5.49336	3.7132	11.2174	4.42331	5.13327	3.78219	4.67844	3.40272	3.97097	4.89156	4.32671	2.96416	2.35421	5.57122	1.99945	4.79041	2.56224	2.86052	2.31062	3.46018	1.49304	2.89404	2.23403	1.48855	2.30471	2.65698
0.92_74.037				74.037		0.92	40	15	15	10	1.52372	0.820003	1.38361	0.958562	1.21842	0.735597	2.04045	1.32953	0.854903	0.904495	0.990539	0.737456	1.14033	0.926477	0.915777	1.50776	1.57018	0.90911	2.80452	2.67621	2.26145	1.8918	2.19634	2.06031	1.86364	1.21188	1.49336	1.46961	1.29409	1.41577	1.55382	1.70877	1.42856	1.09294	1.78314	1.69987	1.01976	1.24968	0.314503
1.65_80.026				80.026		1.65	30	15	15	0	0.858424	0.437394	0.304933	1.04223	1.39957	0.737433	1.47013	1.12905	0.909885	0.962437	1.4808	1.21757	1.15362	0.87202	1.07598	0.413626	0.63384	0.448684	0.944749	0.505727	0.536412	0.468745	0.387519	0.514374	0.475684	0.39993	0.508851	0.321684	0.339337	0.328607
0.51_83.035				83.035		0.51	40	15	15	10	2.52711	1.03037	16.0127	1.678	0.372652	1.22338	2.02078	0.321222	0.211454	1.77866	1.31853	1.33666	1.24672	0.780596	1.30579	2.83848	0.987267	0.485899	2.43803	2.5146	0.119088	4.18127	0.890519	6.19618	2.15478	2.11089	0.100129	0.0871081	1.56012	0.222594	0.126205	0.272662	0.504928	0.585084	2.39974	3.32127	1.90399	1.61584	0.480517
0.83_86.037				86.037		0.83	38	15	15	8	1.53233	0.77425	0.872219	0.830993	1.18295	0.598064	1.87743	0.437228	0.946024	0.45213	0.665779	0.384299	0.467585	0.414704	0.650065	0.582388	0.854801	0.403964	0.204255	0.435621	0.231108	0.228102	0.336654	0.109074	0.284212	0.18351	0.197073	0.464006	0.335508	0.353226	0.906505	0.544017	0.36251	0.0867414	0.118111	0.247045		0.11898
0.73_86.037				86.037		0.73	38	15	15	8	3.25323	1.91118	2.70248	1.84756	2.36411	1.44991	2.75785	1.06323	1.3951	0.888677	1.31897	1.08524	1.85653	2.14279	2.04893	1.44295	2.0631	1.15375	0.920013	1.39354	0.599647	0.340875	0.711801	0.419341	0.481421	0.477958	0.562493	0.568916	1.07082	0.589822	0.496712	0.322484	0.236644	0.13901	0.134973	0.241029		0.143029
0.73_88.016				88.016		0.73	39	15	15	9	2.93732	1.84703	2.15651	1.87045	1.9391	1.28876	2.31121	0.935631	1.16132	0.943137	1.15985	0.90745	1.49475	2.11662	2.04526	1.39192	1.84674	0.89146	0.646926	1.20673	0.55586	0.879147	0.553638	0.392627	0.425989	0.405853	0.373508	0.49777	0.965602	0.474008	0.311558	0.351076	0.464836	0.097027	0.106132	0.172123	0.0509091	0.0785316
1.66_88.052				88.052		1.66	31	6	15	10	0.128428	0.113661	0.255774					0.237601				0.143505	0.127473			0.15483	0.127697	0.14028	0.172204	0.16236	0.127997	0.193366	0.170508	0.18894	0.192168	0.164154	0.22572	0.184681	0.132451	0.178342	0.112409	0.112245	0.0819379	0.125731	0.15879	0.121941	0.115408	0.325847	0.100865
1.39_90.031				90.031		1.39	30	15	15	0	0.452178	0.238872	0.275698	0.560931	0.718991	0.324204	0.709464	0.509637	0.495129	0.480493	0.791423	0.5464	0.341734	0.442338	0.407439	0.262643	0.356035	0.328826	0.328422	0.278952	0.303971	0.335455	0.272796	0.392549	0.279855	0.354434	0.358288	0.335911	0.284867	0.311853
0.58_90.032				90.032		0.58	32	8	14	10						2.08519		18.6843	1.78432	3.9131		1.26992	0.586594	2.54667	1.06137	0.894881	0.173045	1.00112	2.3141	0.668326	0.994346		1.83805	1.22624	2.8653	1.2453	3.59074	1.40309	1.52484	1.829	0.997504	0.09089	0.356617	0.361724	0.0404121	0.121096	0.574826	0.0540103	0.422064
0.77_94.052				94.052		0.77	40	15	15	10	0.297527	0.164074	0.175495	0.303423	0.226875	0.238968	0.287976	0.42961	0.184594	0.24274	0.375732	0.285175	0.215494	0.181965	0.158481	0.387891	0.199485	0.259821	0.922161	0.423506	0.775351	1.25968	0.48059	1.43367	1.24138	1.06972	1.08965	0.941287	0.539947	0.589393	0.154027	0.113214	0.265781	0.144206	0.520556	0.479178	0.274316	0.615457	0.162275
1.65_95.037				95.037		1.65	33	15	15	3	1.27761	0.597786	0.477685	1.49398	2.07159	1.10136	2.24221	1.67184	1.43854	1.49758	2.20728	1.78991	1.69889	1.29269	1.3564	0.611447	1.05343	0.687289	1.32944	0.758058	0.8147	0.785453	0.708318	1.00048	0.679416	0.671661	0.730024	0.462482	0.478654	0.474547	0.0459627	0.0356558	0.0540761
0.77_95.037				95.037		0.77	40	15	15	10	0.293834	0.163373	0.1316	0.303423	0.230426	0.238968	0.288449	0.445899	0.184746	0.246401	0.371942	0.285175	0.214374	0.178955	0.15216	0.277261	0.204825	0.274721	0.910171	0.393164	0.775351	1.24927	0.653736	1.43367	1.2451	1.06972	1.00692	0.927993	0.53983	0.591028	0.152996	0.118721	0.264064	0.170368	0.498026	0.498252	0.325145	0.615457	0.148616
1.65_97.053				97.053		1.65	33	15	15	3	3.31126	1.51568	1.19788	3.7304	5.02048	2.53327	5.29004	3.86469	3.6175	3.41508	5.18221	4.24791	4.43888	3.1496	3.27954	1.45238	2.45737	1.66347	3.35846	1.98312	1.92063	1.79058	1.61051	2.22544	1.76097	1.66841	1.8031	1.26064	1.32917	1.26096	0.0536825	0.0542763	0.0343396
5.96_97.968				97.968		5.96	39	15	15	9	1.0987	0.448502	4.28688	0.854999	0.307684	1.72552	1.42788	72.6677	0.664826	1.69085	4.99613	1.30493	1.40897	0.475849	1.08961	0.241758	0.303433	0.631441	0.7359	2.08289	0.909212	0.573249	0.527629	0.862767	0.333301	0.37287	0.949757	3.2426	0.319214	0.52971	1.38271	1.16882	0.7415	1.33215	0.159753		0.385103	0.248823	0.218398
3.76_98.067				98.067		3.76	40	15	15	10	170.79	198.577	244.274	265.206	224.024	201.134	219.144	212.192	134.445	174.757	230.137	375.597	295.099	315.78	285.291	177.565	203.057	189.871	309.045	225.613	156.625	119.874	174.486	224.515	184.884	163.807	167.868	194.492	169.898	132.064	111.11	127.044	101.572	231.669	122.801	113.22	126.197	124.612	156.219
0.56_99.032				99.032		0.56	29	8	14	7	0.262975		0.15256				0.334558	0.238154	0.130542	0.178949	0.324928	0.115229				0.230614	0.227845		0.292879	0.590898	0.226739	0.367352	0.459681	0.481296	0.287215	0.265586	0.397993	0.266374	0.188434	0.144884	0.12559	0.0809591	0.0999549		0.433691	0.563876	0.434841	0.235984
0.92_100.016		C4H4O3	100.016	100.016	0.04	0.92	40	15	15	10	0.288401	0.206985	0.266073	0.255074	0.302944	0.220515	0.382307	0.297229	0.178871	0.130528	0.269935	0.115008	0.286846	0.140398	0.218631	0.296322	0.366873	0.281125	0.554947	0.676451	0.55772	0.461846	0.492492	0.528315	0.384007	0.274326	0.343454	0.324435	0.348293	0.342061	0.373841	0.409877	0.369368	0.267317	0.401008	0.345754	0.211023	0.256134	0.0745797
1.22_100.052				100.052		1.22	37	15	15	7	8.37564	5.70653	6.67023	7.95088	10.2804	4.98538	12.4972	11.2059	9.39457	7.90675	8.55156	6.35693	3.96851	4.54882	2.71831	5.79647	7.08252	4.3392	10.1947	11.4461	6.13841	5.60094	4.44567	8.09142	4.94361	4.83039	4.30279	1.47584	1.44469	0.938388	0.318246	0.378979	0.294883	0.157047		0.0546289		0.0624638
3.76_100.072				100.072		3.76	40	15	15	10	0.610959	0.655973	0.806766	0.896663	0.791158	0.74952	0.785657	0.756477	0.464913	0.611447	0.797965	1.27657	1.05928	1.08649	1.02029	0.581063	0.678767	0.647174	1.07485	0.788715	0.580268	0.433694	0.599556	0.779655	0.663102	0.565686	0.600245	0.680773	0.612462	0.449134	0.379313	0.449636	0.363729	0.830729	0.43756	0.406352	0.442279	0.42265	0.52202
1.02_101.048				101.048		1.02	30	15	15	0	1.3449	1.04133	1.37832	2.018	1.63578	1.08609	2.4209	1.80092	1.52401	1.81084	1.96725	1.59665	2.03275	2.46229	2.67281	0.723297	1.15287	0.823131	0.911879	1.2244	0.936965	1.10477	1.04803	1.09535	0.926651	0.971377	1.34236	0.919345	1.18516	1.81788
1.22_102.032		C4H6O3	102.032	102.032	-0.3	1.22	33	15	15	3	2.14262	1.45019	1.87296	1.94563	2.6846	1.47851	3.41184	3.17927	2.50898	1.99979	2.46707	1.87521	1.06784	1.1352	0.842803	1.42301	1.72669	1.04953	2.70527	2.87921	1.80145	1.63772	1.22441	2.17216	1.25518	1.27322	1.17255	0.393997	0.45455	0.467269	0.0836465	0.0882823	0.0748878
0.55_102.032		C4H6O3	102.032	102.032	-0.3	0.55	40	15	15	10	0.48629	0.301028	0.418113	0.400611	0.438729	0.28833	1.29537	0.34017	0.468768	0.354926	0.499272	0.306904	0.541773	0.364305	0.799432	0.657225	0.931473	0.494292	2.61572	1.09552	1.91451	2.23358	2.17432	2.64488	2.01682	1.03374	1.00975	1.359	0.969548	1.06055	1.37434	1.31853	2.09758	1.55094	1.41795	1.98816	0.465895	0.435367	0.222781
2.76_102.068		C5H10O2	102.068	102.068	0.08	2.76	30	15	15	0	0.238909	0.192304	0.160558	0.438686	0.449843	0.224931	0.58037	0.42571	0.367274	0.516372	0.629339	0.3557	0.423077	0.376941	0.341219	0.133031	0.091572	0.0956276	0.139825	0.105866	0.0934946	0.0543329	0.13037	0.157455	0.0935989	0.0782725	0.0889017	0.0822113	0.0864413	0.0456116
3.61_103.993				103.993		3.61	30	15	15	0	0.637789	0.260815	0.687413	0.434485	0.403661	0.284958	0.85113	0.593706	0.588003	0.315547	0.446691	0.287992	0.278326	0.521156	0.263022	0.196578	0.254641	0.281584	0.264881	0.226293	0.273559	0.291928	0.297275	0.281545	0.168424	0.204703	0.362162	0.273046	0.17727	0.22526
0.54_107.988				107.988		0.54	34	15	15	4	0.528795	0.368709	0.464642	1.20399	0.898818	0.96801	1.43341	1.27717	0.953176	1.00679	2.09733	1.63693	1.35113	2.10736	1.70818	0.558379	0.486066	0.38762	1.01837	0.631488	0.587357	0.878202	0.927474	0.755421	0.852547	0.995386	1.38767	1.34524	0.985217	1.03216					0.964964	1.33915	1.48409	0.411702
2.2_111.032				111.032		2.2	35	14	15	6	0.230124	0.199803	0.202393	0.218165	0.309611	0.140692	0.342555	0.260277	0.254658	0.249027	0.328814	0.203012	0.143301	0.143545		0.143634	0.158176	0.137291	0.185453	0.21636	0.170007	0.168445	0.186607	0.220113	0.129065	0.130715	0.172594	0.101081	0.128141	0.198943	0.236099	0.279016	0.18455	0.194305		0.0854562
1.75_111.032				111.032		1.75	35	15	15	5	0.71408	0.323399	0.290565	0.845305	1.04278	0.560005	1.09984	0.92471	0.902945	1.26856	1.53596	1.308	1.03532	0.828693	0.691373	0.49171	0.53587	0.419844	0.832093	0.451198	0.524341	0.323287	0.404278	0.648085	0.406427	0.438866	0.472598	0.340733	0.405159	0.220182	0.060473	0.0730742	0.056711			0.0547691		0.0382667
1.65_111.068				111.068		1.65	30	15	15	0	0.851965	0.427289	0.293273	1.05908	1.28014	0.64748	1.50731	1.02718	0.986894	1.01196	1.39299	1.15609	1.12401	0.87666	0.784509	0.438742	0.651007	0.477733	0.895923	0.544492	0.502937	0.449558	0.454633	0.613777	0.51303	0.446151	0.49804	0.323031	0.373863	0.318589
0.73_112.016				112.016		0.73	40	15	15	10	33.4275	20.2973	25.7992	20.6038	24.5033	16.7395	32.0196	12.3907	14.8278	9.95994	13.9766	11.2644	18.4965	21.9449	24.4459	15.4444	21.0147	11.2043	9.38225	13.7213	7.46947	3.55185	6.43501	3.00504	4.81607	4.68768	4.89901	5.54231	10.0567	5.38319	5.30639	5.29116	2.41935	1.41093	1.54145	2.59651	0.297712	1.2635	0.166503
1.74_114.031				114.031		1.74	29	15	14	0	0.165444	0.0729637	0.18605	0.164686	0.18865	0.0818234	0.163443	0.189756	0.183724	0.268838	0.225114	0.250456	0.178535	0.0750861	0.148787	0.3054	0.140347	0.3324	0.373324	0.0861	0.157752	0.0965059		0.114324	0.109595	0.0645728	0.0811701	0.0765452	0.0767668	0.121367
0.82_116.01				116.01		0.82	39	15	15	9	0.499672	0.407968	0.274837	0.318219	0.317644	0.198683	0.349056	0.254608	0.375502	0.0635956	0.0981609	0.0818329	0.601929	0.184201	0.21915	0.225453	0.194795	0.214464	0.208032	0.133049	0.15605	0.119616	0.423288	0.108674	0.13239	0.0665448	0.0930223	0.0620419	0.141186	0.12579	0.441153	0.424293	0.179133	0.10085	0.185156	0.178709	0.0527453	0.0828584
1.57_116.047				116.047		1.57	27	7	10	10	0.166247						0.173793	0.0421185	0.0759589	0.0674275				0.369121	0.229754	0.134011						0.236251	0.15607	0.167611	0.109392	0.201511	0.131313	0.165961	0.241935	0.294831	0.84189	0.824726	1.20487	0.874988	0.336586	0.361548	0.214882	0.44284	0.450784
2.12_117.058		C8H7N	117.058	117.058	-0.15	2.12	40	15	15	10	0.20026	0.172705	0.467408	0.179659	0.21618	0.374311	0.433559	0.825709	0.508918	0.818653	0.583649	0.192992	0.202947	0.188552	0.343483	0.305637	0.235322	0.201328	1.04281	0.892668	0.5405	2.37532	0.939452	2.59125	2.14029	2.07812	1.35991	1.08895	1.1205	1.18919	0.617539	0.586944	0.734164	0.717608	0.606838	0.588933	0.199583	0.405388	0.0623351
1.85_117.079				117.079		1.85	40	15	15	10	0.126895	0.115141	0.227424	0.207707	0.211582	0.130747	0.310143	0.830537	0.179738	0.27661	0.297955	0.089707	0.193503	0.176457	0.259602	0.112802	0.0863647	0.0856211	0.168784	0.0921629	0.100919	0.19479	0.168099	0.18553	0.171894	0.166151	0.161725	0.152653	0.0834154	0.0946615	0.512999	0.540104	0.531808	0.583366	0.266779	0.290612	0.118551	0.253518	0.149823
3.29_118.042				118.042		3.29	30	15	15	0	0.376558	0.286803	0.186695	0.374911	0.26554	0.363846	0.38444	0.304404	0.26271	0.249236	0.366972	0.232709	0.128093	0.132714	0.181253	0.149559	0.239089	0.225806	0.232098	0.127941	0.251677	0.171454	0.175145	0.230475	0.196239	0.179272	0.177824	0.142169	0.129486	0.107496
3.08_118.062				118.062		3.08	30	15	15	0	0.391427	0.211563	0.304076	0.257877	0.337243	0.232227	0.467683	0.329479	0.454788	0.291581	0.181241	0.216419	0.277845	0.336946	0.236354	0.10734	0.218551	0.233074	0.142821	0.20933	0.224142	0.249231	0.158058	0.376103	0.183146	0.0657488	0.206093	0.154771	0.150039	0.150633
1.22_118.063				118.063		1.22	30	15	15	0	0.562905	0.393429	0.535167	0.514568	0.708312	0.37779	0.916023	0.863908	0.63486	0.574844	0.67575	0.505081	0.307461	0.297961	0.229747	0.407047	0.511596	0.300157	0.703597	0.767957	0.48111	0.445215	0.337867	0.572117	0.355846	0.356759	0.311726	0.139666	0.13355	0.126253
1.06_122.004				122.004		1.06	30	15	15	0	3.33817	1.19278	1.19699	3.36107	2.60127	2.04857	4.11471	2.14882	2.41957	2.56344	2.50777	3.31709	1.76931	1.73493	1.86438	1.27725	1.83302	1.22143	2.07409	2.30346	2.36088	1.17165	1.6083	2.06447	1.31784	1.24883	1.23841	1.30011	0.614482	1.09404
0.6_123.032				123.032		0.6	23	0	13	10																0.156181			0.71415	0.406825	0.341013	0.59546	0.862909	0.504249	0.731613	0.632962	0.550996	0.853249	0.659916	0.597045	0.619431	0.678992	2.72244	3.47473	1.25096	0.471375	1.25398	1.46478	1.05222
3.07_125.055				125.055		3.07	40	15	15	10	0.267534	0.252051	0.328973	0.439433	0.283123	0.303964	0.349521	0.303184	0.201535	0.312144	0.461128	0.979694	0.440333	0.544458	0.501652	0.205629	0.289325	0.275232	0.428922	0.322115	0.19416	0.225577	0.26525	0.420505	0.26538	0.264028	0.219198	0.285942	0.250599	0.188407	0.133727	0.197532	0.137	0.299087	0.119171	0.109236	0.120551	0.131445	0.151665
3.52_128.084				128.084		3.52	40	15	15	10	0.202091	0.204835	0.393774	0.284046	0.269245	0.237115	0.391423	1.72144	0.16909	0.312087	0.411021	0.831402	0.376532	0.42885	0.341174	0.203105	0.173931	0.248274	0.314939	0.2242	0.236022	0.175398	0.229101	0.351631	0.245846	0.229903	0.340125	0.168327	0.238655	0.20728	0.230227	0.147374	0.135597	0.193744	0.134167	0.0890044	0.0969831	0.144415	0.190283
0.8_129.043				129.043		0.8	40	15	15	10	10.6593	12.2244	13.4146	3.77197	6.37507	24.1062	7.919	21.1153	5.28999	4.25498	3.11326	4.57795	3.45522	5.15161	3.19751	12.4507	13.3482	8.10062	10.6404	13.4934	8.69	5.31517	7.5923	7.91287	4.64475	4.75446	5.02976	3.0169	2.77525	2.22574	12.122	9.71282	9.1383	8.44553	27.0772	33.0517	12.6727	21.6889	1.95152
0.83_130.027				130.027		0.83	39	15	15	9	1.32667	0.64527	0.88305	0.620426	0.775108	0.6302	2.02361	0.431783	0.878701	0.406175	0.472164	0.288086	0.532045	2.56056	0.465478	0.524057	0.675545	0.312126	0.39368	0.390037	0.297589	0.272166	0.368274	0.163828	0.301241	0.137608	0.289477	0.204696	0.310537	0.308006	0.764394	0.745225	0.373272	0.132559	0.266997	0.178954	0.111372	0.177221
0.73_130.027				130.027		0.73	39	15	15	9	3.04246	1.71099	3.22272	1.76542	2.27179	1.46451	3.15564	1.67915	1.59591	1.12307	1.33557	0.967965	1.98352	2.56056	2.08589	1.53418	1.86695	1.22348	1.46473	1.47658	0.936001	0.767986	0.855945	0.289683	0.499723	0.536373	0.839291	0.556328	1.17954	1.06217	0.579811	0.377353	0.209792	0.273872	0.211307	0.282322	0.113371	0.177221
2.52_130.063		C6H10O3	130.063	130.063	-0.01	2.52	38	13	15	10	0.10555		0.259839	0.16661	0.187792		0.272048	0.174547	0.0907941	0.16508	0.162378	0.106733	0.133316	0.144	0.209138	0.621347	0.490304	0.320409	3.98917	2.69096	2.19265	2.66403	2.48463	2.91862	2.13303	1.3263	0.986011	0.910379	0.934797	0.466453	1.12257	1.18946	1.35293	0.785572	1.3074	2.19646	0.353526	0.516124	0.474013
1.6_130.063		C6H10O3		130.063		1.6	29	15	14	0	0.188831	0.265678	0.179434	0.239399	0.266065	0.174479	0.448924	0.327954	0.349162	0.210155	0.384261	0.195275	0.246856	0.268079	0.404168	0.151958	0.156461	0.2129		0.213538	0.179455	0.183312	0.265358	0.262104	0.127199	0.137394	0.22382	0.225106	0.183604	0.221805
1.08_131.094				131.094		1.08	40	15	15	10	0.903625	0.48465	1.44722	0.821659	0.896004	0.904301	0.940531	1.37098	0.987833	1.24117	0.695034	0.578213	0.53569	0.452625	0.468758	1.275	1.04732	0.710138	2.85838	2.19845	1.43093	1.3953	1.31018	2.23338	1.11034	0.956505	0.695795	0.338759	0.423369	0.285178	5.86319	6.16652	4.77527	5.50818	1.71247	2.41628	0.454182	1.15492	0.47498
3.07_131.095				131.095		3.07	35	15	15	5	0.507669	0.273768	0.426392	0.452529	0.566938	0.374838	0.742928	0.675963	0.512715	0.499617	0.649726	0.336775	0.583516	0.469641	0.625371	0.338372	0.423124	0.181001	0.534798	0.417824	0.304088	0.386157	0.311776	0.581799	0.400268	0.324628	0.309295	0.280479	0.366495	0.410325	0.0253945	0.214545	0.0617438		0.0442101			0.0408545
2.9_131.095				131.095		2.9	37	12	15	10	0.0655532		0.402368		0.133427		0.127567	1.06427	0.0982669	0.139684	0.166255	0.158207	0.180229	0.140747	0.166066	0.127077	0.134927	0.0615699	0.197048	0.168144	0.177632	0.342988	0.312894	0.454634	0.341247	0.312805	0.312305	0.305597	0.160507	0.165629	1.01524	1.04552	1.1222	1.10061	0.49479	0.540765	0.260923	0.499061	0.246338
2.74_131.095				131.095		2.74	39	15	15	9	0.523086	0.418233	0.426742	0.606415	0.690512	0.36211	1.0122	0.638237	0.707086	0.666855	0.97821	0.535345	0.714472	0.646096	0.891011	0.345995	0.369784	0.346535	0.417098	0.55007	0.447304	0.484728	0.580255	0.44865	0.256714	0.348537	0.528244	0.376291	0.430315	0.743711	0.366627	0.34504	0.345319	0.343975	0.112975	0.0497016	0.106653	0.0387991
1.01_131.095				131.095		1.01	40	15	15	10	0.37537	0.229973	1.00697	0.2254	0.260688	0.586656	0.398694	0.807364	0.56265	0.34453	0.331605	0.583444	0.532807	0.270089	0.322952	0.629837	0.590444	0.365984	1.07822	1.37467	0.565218	0.519761	0.354042	0.628037	0.782365	0.4893	0.377891	0.160615	0.270946	0.219042	2.01778	2.15793	1.13836	1.40218	0.595845	0.955984	0.136125	0.403574	0.178835
1.66_132.042				132.042		1.66	40	15	15	10	0.418472	0.314491	0.865038	0.243528	0.210878	0.212642	0.254672	0.687416	0.0685938	0.121022	0.192674	0.491266	0.37246	0.219175	0.443237	0.495585	0.37961	0.376467	0.592779	0.590639	0.424383	0.52735	0.424612	0.584873	0.611474	0.492939	0.750235	0.516323	0.435108	0.501346	0.34193	0.295795	0.28012	0.374854	0.527337	0.390984	0.278628	0.888604	0.309321
1.46_132.043				132.043		1.46	40	15	15	10	0.603152	0.227119	0.406068	0.371581	0.517352	0.242906	0.694472	0.889536	0.544719	0.41411	0.320418	0.453784	0.401626	0.345181	0.302763	0.302058	0.40949	0.313848	0.54402	0.550992	0.44686	0.398752	0.256078	0.358526	0.359383	0.202062	0.410111	0.293546	0.249258	0.339216	0.570436	0.533018	0.614945	0.448872	0.154428	0.15345	0.0902612	0.135268	0.108972
3.72_132.079				132.079		3.72	30	15	15	0	1.50034	0.962436	0.847995	1.4393	1.70102	1.23724	2.1347	1.77994	1.98214	1.50126	1.12442	1.08318	1.25753	1.43363	1.47921	0.498546	0.782794	0.6706	0.78492	1.04073	0.783543	0.757531	1.37644	1.49574	0.659203	0.335301	0.490151	0.381443	0.673476	0.747687
3.65_132.079				132.079		3.65	30	15	15	0	1.13528	0.670583	0.916142	0.63416	0.736152	0.7665	1.24258	1.55985	1.40117	1.12556	0.921051	0.479344	0.694537	0.967327	0.74441	0.365675	0.516035	0.541919	0.513822	0.666413	0.574233	0.716193	0.408608	1.03108	0.481138	0.286903	0.64781	0.379504	0.638199	0.590864
1.77_134.058				134.058		1.77	27	15	12	0	0.206333	0.171496	0.142183	0.149132	0.22205	0.142202	0.364797	0.165854	0.240716	0.220336	0.166158	0.170848	0.225472	0.633243	0.529158	0.0696131	0.141548	0.144354		0.0940298	0.102445	0.158546	0.113829	0.121966	0.154733	0.0714852	0.156984	0.0888104
1.17_134.058				134.058		1.17	40	15	15	10	0.790241	0.589409	0.801828	0.564982	0.78867	0.334545	1.52089	0.363378	0.398253	0.523359	0.738778	0.384039	0.713704	0.907321	0.884978	0.676369	0.690518	0.583838	0.410725	0.334643	0.420081	0.182241	0.546695	0.375407	0.47094	0.260135	0.555354	0.54267	1.37975	0.769294	0.402114	0.498124	0.203597	0.184494	0.175628	0.153326	0.095281	0.123868	0.0917674
0.75_134.058				134.058		0.75	40	15	15	10	2.55563	2.78945	3.49174	1.9602	1.15057	1.45203	3.72017	1.55866	0.356724	0.95221	1.366	0.874908	2.39154	3.84375	1.72827	5.51005	6.47084	6.06052	7.57604	5.42789	6.38794	2.07149	2.59667	3.42684	2.80484	2.08443	0.984061	4.31204	3.2258	1.18855	11.7409	10.938	4.52809	4.81677	3.85942	6.79056	1.22569	2.6194	0.258797
0.65_134.058				134.058		0.65	40	15	15	10	0.987365	0.679736	0.812462	0.420896	0.546444	0.358463	0.916745	0.573863	0.442478	0.507471	0.567956	0.543701	0.947354	1.90049	0.654077	0.766898	0.860579	0.602961	0.620488	0.557378	0.309201	0.221163	0.469926	0.29584	0.278951	0.354721	0.346546	0.364488	0.64221	0.39592	11.7029	0.164344	0.110079	4.99077	0.163451	6.63797	0.166187	0.197867	0.146975
2.18_135.054				135.054		2.18	40	15	15	10	0.461861	0.346541	0.425747	0.503334	0.565197	0.33315	0.723831	0.410022	0.310519	0.551073	0.728722	0.494026	0.476283	0.507258	0.659618	1.02758	0.936271	0.671361	1.82949	1.06907	1.01292	0.951253	0.828432	1.29011	0.965592	0.818894	0.815205	0.484837	0.696574	0.787227	1.66641	1.57494	1.17284	1.02622	1.8426	1.70183	0.638569	1.45675	0.270229
1.37_135.054				135.054		1.37	40	15	15	10	0.517801	0.311406	0.766529	0.435589	0.454216	0.367534	1.08102	0.714663	0.469356	0.712136	0.446064	0.298446	0.376618	0.532237	0.848658	1.13328	0.848053	0.532863	1.94376	1.20097	1.27416	0.877518	0.905371	1.0811	0.870981	0.724253	0.63446	0.449016	0.633143	0.4448	0.49188	0.42885	0.394186	0.210484	1.64403	1.14329	1.10047	1.66871	0.270836
4-hydroxyacetophenone fragment 2		C8H8O2	136.052	136.052	0.4	3.17	35	15	15	5	0.358816	0.198253	0.414314	0.269921	0.263066	0.287143	0.198668	0.474946	0.0885975	0.22051	0.17725	0.338258	0.430837	0.571293	0.366664	0.534655	0.50048	0.540335	0.623856	0.456296	0.599167	0.304554	0.434465	0.477232	0.409047	0.301406	0.306636	0.25393	0.395106	0.237561	1.00832				0.139359	0.101414	0.0835266	0.12001
4-hydroxyacetophenone fragment 1		C8H8O2	136.052	136.052	0.4	2.67	29	14	15	0	0.387265	0.16727	0.225046	0.180259	0.227948	0.224606	0.349902	0.206774	0.25265	0.223116	0.30616	0.255367	0.232642	0.104942		0.323116	0.149831	0.279297	0.184375	0.262046	0.202689	0.126731	0.143482	0.134994	0.121777	0.161452	0.152481	0.0875331	0.113388	0.117572
0.77_139.027				139.027		0.77	37	12	15	10	0.415946	0.273316		0.0692991	0.417206	0.369403	0.258928	0.317871	0.250099	0.226266	0.227434	0.215439	0.237306			0.216067	0.331655	0.243934	0.548863	0.411729	0.533654	0.840351	0.54963	1.01583	0.940938	0.652198	0.75855	0.704233	0.381318	0.459471	0.112031	0.112382	0.141365	0.113669	0.325363	0.401634	0.157863	0.418657	0.110454
2.44_139.063		C7H9NO2	139.063	139.063	0.33	2.44	39	14	15	10	0.206679	0.127351	0.233245	0.187479	0.192956	0.165392		0.210118	0.148163	0.160516	0.170193	0.153213	0.152534	0.186245	0.126591	0.18426	0.146249	0.16381	0.267928	0.148928	0.1145	0.130909	0.151785	0.171638	0.131045	0.132287	0.138222	0.144871	0.13982	0.108136	0.115737	0.126408	0.109708	0.118974	0.1769	0.116274	0.153659	0.152378	0.109553
1.77_139.063		C7H9NO2	139.063	139.063	0.33	1.77	40	15	15	10	110.675	53.5633	38.2151	131.998	165.666	83.1115	186.713	128.446	121.112	124.652	178.039	142.108	143.663	110.101	109.888	2.54707	2.36699	2.09766	3.43916	1.71663	1.91705	1.96623	1.50378	2.74426	2.01533	1.94681	1.78138	2.00175	0.901352	0.988168	2.19071	1.96998	1.11516	1.19524	0.601954	0.80006	0.474744	0.688785	0.297566
1.65_139.063		C7H9NO2	139.063	139.063	0.33	1.65	40	15	15	10	110.66	53.7201	38.2217	132.001	165.609	83.0232	186.687	128.379	121.278	124.612	178.276	142.072	143.734	110.315	109.962	51.1956	85.4938	57.5353	112.454	69.0677	63.6179	58.0718	53.0662	77.4016	59.8572	54.8512	60.2224	41.1633	43.5906	40.922	2.16875	1.97838	1.08821	1.16575	0.604957	0.78371	0.471698	0.192973	0.293735
1.65_141.043				141.043		1.65	36	15	15	6	0.63249	0.29204	0.208368	0.716412	0.890686	0.460657	1.03771	0.756115	0.696193	0.697675	1.01886	0.772869	0.82291	0.621775	0.653621	0.283249	0.482447	0.309615	0.621225	0.413237	0.381408	0.312159	0.257841	0.403556	0.348862	0.301109	0.337248	0.227043	0.311593	0.231037	0.0407377	0.0380905			0.0656174	0.0572392	0.0689075	0.0616999
1.74_142.026				142.026		1.74	33	15	15	3	0.323614	0.175498	0.206277	0.398005	0.454021	0.159054	0.281827	0.316478	0.334442	0.435701	0.363166	0.423426	0.230622	0.220047	0.255976	0.549929	0.261076	0.587093	0.632678	0.220075	0.269648	0.172965	0.151319	0.179193	0.188265	0.103815	0.0998658	0.155862	0.121061	0.269676	0.0403485	0.0424489	0.0336879
1.4_143.058				143.058		1.4	39	14	15	10	0.16844	0.0874781	0.239781	0.276599	0.233262	0.198347	0.262024	0.377397	0.159616	0.206183	0.169075	0.0862828		0.133945	0.214531	1.45315	0.834582	0.522944	2.11376	1.69552	1.51355	1.02922	1.22261	0.866747	0.788928	0.546189	0.593857	0.345644	0.443403	0.325754	0.763571	0.678111	0.679022	0.577327	2.94119	2.19001	1.31119	2.4948	0.261216
1.02_143.058				143.058		1.02	30	15	15	0	2.37362	1.79694	2.56682	3.47505	2.99702	2.07403	4.89501	3.47437	2.85189	3.11315	4.00592	3.09739	3.75407	4.44664	5.25897	1.26173	1.84507	1.40271	1.63989	2.09189	1.85233	2.0792	1.80976	2.0352	1.5282	1.7201	2.33095	1.69616	2.21635	3.20168
2.12_143.073				143.073		2.12	32	9	14	9	0.0648936		0.168955			0.11985	0.14002	0.325685	0.197173	0.329604	0.195801				0.120485	0.136491	0.0921931		0.368374	0.370962	0.202547	0.84368	0.373983	0.985821	0.845153	0.76818	0.491907	0.406234	0.397245	0.435272	0.22604	0.212226	0.251017	0.256958	0.218356	0.232758	0.073076	0.151994
3.76_144.062				144.062		3.76	40	15	15	10	2.16579	2.53379	3.07306	3.30495	2.80573	2.80964	2.7757	2.87971	1.57023	2.09715	3.02328	5.09406	3.96597	3.94623	3.76575	2.337	2.61793	2.35731	4.04223	2.73744	2.25543	1.55963	2.17204	2.79008	2.25515	2.02919	2.09104	2.45623	2.14031	1.60641	1.44882	1.66636	1.44496	2.96869	1.63998	1.45585	1.56357	1.57493	1.9546
0.55_145.038				145.038		0.55	40	15	15	10	0.512162	0.579298	0.447477	0.261891	0.426794	0.436418	0.895434	0.418658	0.32678	0.58168	0.867532	0.282992	0.394776	0.867312	0.714146	0.741083	1.54874	1.02498	6.15763	3.87668	3.91307	4.57492	3.98342	5.82841	4.35211	2.87037	2.64835	1.98975	0.734783	1.01855	2.12211	2.00963	3.18895	2.95628	5.60923	9.30331	3.72325	3.31345	1.49557
3.57_145.053				145.053		3.57	40	15	15	10	0.36533	0.407071	0.558926	0.502959	0.419012	0.40129	0.453083	0.573898	0.241923	0.312748	0.443574	0.458647	0.524241	0.614239	0.584662	0.613323	0.581288	0.494626	1.44296	0.983263	0.67786	0.970378	0.637583	1.10258	1.61662	1.12895	0.872539	1.09188	0.713919	0.514759	0.567852	0.46548	0.516644	0.50323	0.903826	0.776582	0.682313	0.69885	0.402315
2.02_146.058				146.058		2.02	39	14	15	10	0.275025	0.196701	1.18529	0.103007	0.429164		0.24884	3.79917	0.151602	0.186158	0.10773	0.705705	0.427993	0.520321	0.286755	0.486073	0.376774	0.325664	0.622237	0.359966	0.424237	0.354061	0.337398	0.470785	0.354089	0.367527	0.563393	0.243235	0.264598	0.108946	0.365675	0.293493	0.217674	0.375745	0.276586	0.246817	0.185124	0.275454	0.0838053
3.89_146.094				146.094		3.89	40	15	15	10	0.301663	0.220536	0.221421	0.340985	0.264174	0.204393	0.200122	0.628604	0.120017	0.180142	0.257658	0.31327	0.301112	0.263669	0.379429	0.275845	0.239328	0.212411	0.387864	0.267701	0.278528	0.2572	0.245166	0.320314	0.215188	0.214171	0.228704	0.186641	0.168877	0.166616	0.148232	0.0932091	0.103706	0.123735	0.246922	0.221894	0.272306	0.277822	0.0958734
0.97_148.037				148.037		0.97	39	15	14	10	0.543569	0.497916	0.757479	0.26859	0.348201	0.153878	0.636308	0.418844	0.28211	0.234132	0.292169	0.346744	0.24323	0.271488	1.79165	0.334872	0.504388	0.389814	0.251595	0.4083	0.831094		0.145	0.166626	0.476083	0.394978	0.534305	0.92519	0.642663	0.149376	0.288721	0.349393	0.356606	0.806054	0.737889	0.0631525	0.301558	0.681382	0.198633
0.73_148.037				148.037		0.73	40	15	15	10	2.30651	1.46327	2.437	1.64635	1.80466	1.27971	2.5695	2.88456	3.26009	2.248	2.77582	0.758518	1.41065	2.14631	1.80498	0.913195	1.33412	0.870403	0.871736	2.78707	0.749523	2.15977	0.752239	0.541429	0.604341	0.246898	0.519947	0.715176	0.640853	2.91444	1.65508	0.621558	0.357288	0.754272	0.74077	0.593167	0.274145	0.833447	0.152404
0.67_148.037				148.037		0.67	40	15	15	10	2.16658	1.62995	2.27637	1.26283	1.76225	1.27408	2.20141	2.81737	1.05126	2.16269	2.504	1.08112	1.53634	1.13919	1.1612	1.23003	1.52373	0.880468	0.73691	1.4891	0.796144	2.37894	0.683705	0.277464	0.699929	0.713106	0.290284	1.15476	1.2585	2.94053	1.09252	1.13574	0.647092	0.641863	0.284566	0.217306	0.0552705	0.740983	0.219301
2.67_149.084				149.084		2.67	30	15	15	0	1.0546	0.652226	0.50493	1.33293	1.48999	0.936157	1.87582	1.38678	1.27417	1.40627	1.73899	1.40716	1.63216	1.2518	1.41798	0.623435	0.855487	0.575738	1.26461	1.0106	0.911158	0.823214	0.838906	1.08646	0.87378	0.951376	0.90367	0.945238	1.88339	1.06741
0.65_150.052				150.052		0.65	30	15	15	0	1.15099	0.598727	0.95634	0.925768	1.1305	0.697614	1.25125	0.392973	0.821461	0.978363	1.27013	1.04433	0.833956	0.683405	0.826637	0.826444	0.761563	0.558407	0.96923	0.662912	0.512727	0.799255	0.856981	0.796873	0.767578	0.6362	0.952513	0.608778	0.523796	0.385301
0.98_152.033				152.033		0.98	36	11	15	10	0.0973204		0.562707	0.113937	0.103649		0.133239	0.695003	0.0743713	0.139825		0.134563	0.140447	0.132222		0.57128	0.289176	0.147528	1.25773	0.683163	0.61291	0.694721	0.677018	0.764771	0.594293	0.481042	0.306235	0.173636	0.230373	0.175509	1.3855	1.59121	0.885729	0.881752	0.728677	0.833353	0.213477	0.47212	0.398167
2.2_155.022				155.022		2.2	39	15	15	9	1.10859	0.855274	0.757942	1.01352	1.35591	0.718291	1.56496	1.25397	1.1135	1.18427	1.75304	1.00367	0.750407	0.649191	0.512477	0.686331	0.904666	0.706769	0.840433	1.18178	0.95692	0.920724	0.841574	1.09569	0.627457	0.602607	0.680841	0.527941	0.599661	0.852275	1.21813	1.28355	0.890145	0.827681	0.221649	0.382166	0.0919673	0.12236
2.12_156.069				156.069		2.12	33	13	15	5	0.295326			0.256644	0.282282	0.148309	0.470255	0.357957	0.424553	0.679804	0.724466	0.207376	0.387583	0.406881	0.225075	0.165798	0.133138	0.107461	0.168404	0.170523	0.134181	0.563034	0.162104	0.710902	0.521565	0.571421	0.341967	0.227774	0.231402	0.347484	0.0843447	0.0678749	0.112122		0.0642556	0.0709716
4.06_156.115				156.115		4.06	24	0	15	9																1.78216	0.763365	0.835028	6.90716	3.89689	4.04762	6.50779	3.86997	7.51193	3.18395	2.98884	1.49252	1.16559	1.05945	0.852617	2.42386	2.78357	3.60134	2.11984	2.88742	4.99276	0.670317	0.984067
3.76_157.045				157.045		3.76	40	15	15	10	0.191719	0.223934	0.279368	0.320073	0.230558	0.260625	0.259208	0.255395	0.130906	0.201488	0.250733	0.449117	0.337435	0.380042	0.30894	0.227375	0.260388	0.223053	0.347366	0.308647	0.167601	0.140639	0.233994	0.249541	0.223672	0.208804	0.212682	0.240065	0.194853	0.158908	0.168281	0.185925	0.150664	0.314615	0.158815	0.17575	0.185489	0.168779	0.178677
2.12_159.089				159.089		2.12	37	15	15	7	0.584724	0.316474	0.256177	0.508438	0.684985	0.373729	0.838355	0.532066	0.55384	0.582702	0.71402	0.440838	0.704751	0.477955	0.629224	0.268562	0.349867	0.267391	0.71258	0.345354	0.363641	0.773707	0.421384	0.737721	0.686234	0.5898	0.498653	0.437801	0.537371	0.781361	0.152	0.145122	0.104612		0.12009	0.126733	0.0648895	0.105385
1.22_160.004				160.004		1.22	29	15	14	0	0.264503	0.247214	0.402492	0.35822	0.431877	0.262415	0.365275	0.414632	0.271395	0.254866	0.335936	0.309057	0.198644	0.248834	0.172494	0.237663	0.282248	0.191639	0.449749	0.402414	0.272033	0.227122	0.175656	0.278245	0.196041	0.159331	0.203511	0.0674479	0.0647739
1.5_160.019				160.019		1.5	30	15	15	0	0.850196	0.28923	0.202075	0.50219	1.06797	0.320194	0.884113	0.530506	0.762108	0.60019	0.341159	0.217767	0.223525	0.216452	0.270316	0.265757	0.501748	0.319467	0.492434	0.450994	0.472601	0.444786	0.354708	0.377761	0.260104	0.298143	0.248477	0.178488	0.351522	0.501743
0.52_160.037				160.037		0.52	39	14	15	10	0.509132	0.316858	0.325916	0.473904	0.416397		0.611314	0.485691	0.265629	0.213665	0.434303	0.33779	0.143254	0.248542	0.561548	0.43768	0.363412	0.419932	0.490975	0.323136	0.286166	0.36411	0.290667	0.460771	0.445693	0.231601	0.320331	0.357624	0.335536	0.323439	0.566968	0.502971	0.488665	0.379731	0.311618	0.454333	0.217058	0.293391	0.137578
2.83_160.073				160.073		2.83	40	15	15	10	1.99215	0.978056	1.25903	2.10584	1.82616	1.76853	2.97642	2.4853	1.04815	1.67276	2.50536	2.48933	3.59083	1.92867	2.10514	1.26709	1.3702	1.09493	1.48185	1.03156	1.28864	1.2065	1.45301	1.16034	1.4986	1.74906	2.08826	2.49251	3.28117	8.93288	0.454007	0.409201	0.350923	0.525853	0.828258	0.521792	0.708365	1.48175	0.755298
1.73_160.074				160.074		1.73	36	11	15	10	0.170493			0.169017	0.124162	0.12316		0.182251	0.108079	0.154102	0.14767	0.241688		0.17044	0.152049	0.361397	0.271251	0.204365	0.62972	0.282264	0.315832	0.156035	0.354714	0.371815	0.355819	0.349486	0.283229	0.126131	0.220923	0.116702	0.145942	0.126452	0.143259	0.116222	0.255871	0.236549	0.35336	0.174592	0.0604599
1.64_162.053		C6H10O5	162.053	162.053	-0.2	1.64	38	15	15	8	0.95059	0.309944	0.424497	0.59878	1.37619	0.49653	1.07892	1.35329	3.82789	4.50062	0.850527	0.799291	0.842402	0.579041	0.714046	0.589864	0.564571	0.503069	0.681806	0.433901	0.66823	2.45038	0.299109	0.436546	0.424972	0.248721	0.426171	0.169416	0.184303	0.277403	0.783604	0.947236	0.321446	0.0876251	0.0440978	0.0927906		0.0432276
1.59_162.053		C6H10O5	162.053	162.053	-0.2	1.59	38	15	15	8	1.96762	0.616844	0.724109	1.01303	2.37568	1.23606	3.14473	2.37632	3.82744	4.50062	3.01908	1.73741	1.62272	1.38878	1.68703	1.17441	1.05653	0.464209	1.88187	1.34813	1.57213	2.44541	1.05652	1.76423	1.24384	1.04584	1.12378	0.388805	0.690115	0.83771	0.783604	0.947342	0.305873	0.0878154	0.0440978	0.0927906		0.0432276
1.22_162.053		C6H10O5	162.053	162.053	-0.2	1.22	40	15	15	10	73.6894	46.5234	57.3631	64.9568	89.2156	43.3747	116.221	103.361	83.9338	68.3213	80.4739	58.2562	34.4321	37.1947	24.2209	47.6557	58.1767	35.3304	86.796	94.9816	54.7205	52.0569	38.3465	71.3096	41.0229	41.8414	38.0546	13.2313	13.6297	12.4346	3.14944	3.36831	2.62579	1.43505	0.309291	0.430866	0.144014	0.472676	0.342027
3.22_162.089		C7H14O4	162.089	162.089	0.21	3.22	30	15	15	0	0.624942	0.372139	0.32129	0.581337	0.630574	0.476823	0.776411	0.555311	0.597744	0.702101	0.724871	0.472076	0.46945	0.524349	0.484744	0.255914	0.272666	0.239004	0.419998	0.272043	0.298543	0.231599	0.278925	0.398965	0.234886	0.146587	0.307597	0.167329	0.180396	0.21876
3.68_162.104				162.104		3.68	15	0	15	0																0.0766012	0.104602	0.0873184	0.426497	0.287586	0.2216	0.781832	0.639447	0.905568	0.69624	0.801032	0.497474	0.63195	0.454667	0.896354
0.63_163.91				163.91		0.63	40	15	15	10	0.974775	0.383408	0.976669	1.0943	1.32564	0.754242	2.46355	1.31916	1.09442	1.93129	2.57554	1.0964	2.32364	2.70497	3.81563	0.675056	0.594257	0.427404	1.4279	0.943758	1.00261	1.28375	1.73938	1.7069	1.3122	1.22786	1.38472	1.73785	1.87864	1.61061	0.890453	0.873259	0.923186	1.65713	1.26042	0.991042	1.40334	1.27581	1.65576
3.61_164.014				164.014		3.61	30	15	15	0	1.6567	0.742927	1.51335	1.05595	0.916328	0.716241	1.82745	1.42598	1.21126	0.747602	1.21088	0.774025	0.752225	1.16186	0.637281	0.649345	0.623846	0.72548	0.699201	0.620786	0.664953	0.848072	0.634551	0.885818	0.349309	0.531865	0.865592	0.658924	0.468052	0.519348
0.77_164.032				164.032		0.77	36	12	15	9		0.104411	0.143607		0.153559		0.34384	0.305641	0.232214	0.220617	0.362484	0.175691	0.119108	0.220663	0.243782	0.289605	0.200767	0.182981	0.369922	0.398339	0.300489	0.790637	0.654608	0.700873	0.530851	0.644267	0.407461	0.393299	0.529229	0.878947	0.532577	0.364233	0.955577	1.01816	0.0829787	0.0903582		0.0990791	0.0812067
3.35_164.049				164.049		3.35	40	15	15	10	0.307518	0.244579	0.844034	0.611444	0.51915	0.358634	0.219985	0.343788	0.825925	0.345554	0.467619	0.628417	0.576323	1.01516	0.510611	0.539561	0.407536	0.453339	0.810725	0.524115	0.22253	0.60587	0.110039	0.204766	0.0907464	0.486538	0.437087	0.287392	0.459004	0.362844	0.0273118	0.470357	1.30723	0.839226	0.616454	0.35744	0.89014	0.692908	0.503873
1.22_164.058				164.058		1.22	33	15	15	3	0.861189	0.563279	0.695921	0.739569	1.00282	0.51723	1.3325	1.17908	0.990344	0.803598	0.922523	0.673276	0.428955	0.418708	0.311998	0.576407	0.708425	0.406709	1.05425	1.14515	0.643585	0.636578	0.481809	0.815307	0.490387	0.524906	0.417119	0.145133	0.204799	0.19137	0.0473458	0.04795	0.0454795
3.41_165.043				165.043		3.41	23	0	13	10																0.160491			0.220153	0.183868	0.173065	0.192075	0.162047	0.213574	0.271327	0.282378	0.578155	0.296985	0.206311	0.27745	0.612141	0.485386	1.11334	0.760968	0.541002	0.320356	0.841484	0.702837	0.498228
0.63_165.907				165.907		0.63	40	15	15	10	0.648883	0.33543	0.664849	0.900771	0.832809	0.56557	1.75303	0.796137	0.736521	1.40085	1.7737	0.730506	1.53551	1.83806	2.48169	0.430835	0.408309	0.313774	0.914373	0.632087	0.72938	0.839633	1.17508	1.19236	0.776404	0.826666	0.899448	1.0455	1.1838	1.04328	0.558521	0.545186	0.564137	1.00528	0.841505	0.692958	0.862061	0.821216	1.13845
2.68_166.027				166.027		2.68	30	15	15	0	0.327252	0.193548	0.354675	0.211998	0.224867	0.150866	0.299714	1.07405	0.236739	0.230112	0.152836	0.605696	0.224924	0.168602	0.149441	0.171037	0.0732179	0.103593	0.151092	0.178167	0.177054	0.124651	0.146309	0.113641	0.0878377	0.0713812	0.171033	0.105772	0.120915	0.194043
6.29_166.047				166.047		6.29	40	15	15	10	0.130457	0.165846	0.177225	0.283837	0.133471	0.187147	0.272974	0.249444	0.0910328	0.174017	0.165923	0.191835	0.19755	0.267332	0.324883	0.124879	0.107929	0.11197	0.251968	0.321721	0.155721	0.105157	0.164409	0.15196	0.216146	0.120689	0.139548	0.129005	0.125059	0.0924832	0.288887	0.112288	0.0945355	0.31705	0.122526	0.143874	0.119367	0.113126	0.151226
2.46_166.062				166.062		2.46	30	15	15	0	0.378207	0.467693	0.657105	0.342559	0.440558	0.327138	0.96551	0.3942	0.421799	0.327791	0.422398	0.269288	0.253296	0.426456	0.355842	0.317173	0.217343	0.415827	0.163305	0.455949	0.198227	0.260833	0.181442	0.276935	0.114917	0.131789	0.212105	0.113303	0.163868	0.259243
3.73_166.063				166.063		3.73	30	15	15	0	0.748021	0.387423	0.47147	0.749585	0.681912	0.542375	0.964657	0.756947	0.698094	0.702426	0.763439	0.464516	0.516302	0.602112	0.62509	0.322443	0.406824	0.389016	0.525624	0.392249	0.374851	0.376183	0.311637	0.727662	0.308844	0.217323	0.364202	0.250328	0.298668	0.310381
4.19_166.987				166.987		4.19	40	15	15	10	1.36829	1.83075	2.04908	2.49245	1.97656	1.93072	1.83148	1.59832	0.908856	1.12148	1.59989	1.94849	2.45968	2.79986	2.46625	1.66907	1.86816	1.85359	2.70175	2.06007	1.58776	1.01758	1.43184	1.42827	1.65866	1.38735	1.60288	1.67049	1.44067	0.995808	0.989736	1.01407	0.970101	2.26125	1.27299	1.17976	1.29301	1.1622	1.50661
0.63_167.904				167.904		0.63	40	15	15	10	0.152121	0.0846936	0.196596	0.205936	0.240891	0.13564	0.394524	0.163085	0.152249	0.317851	0.37421	0.224395	0.293188	0.363089	0.543224	0.118774	0.0879123	0.0928974	0.199732	0.128	0.131418	0.190249	0.254194	0.255001	0.173642	0.20891	0.18705	0.265168	0.236874	0.217917	0.125498	0.134413	0.116969	0.225765	0.163856	0.138292	0.164863	0.165058	0.203905
0.76_168.028				168.028		0.76	26	3	13	10								0.197388		0.076867	0.447716					0.286304	0.120049		0.62489	0.473451	0.380078	0.350297	0.27859	0.36222	0.17112	0.202406	0.12309		0.0907063	0.11505	1.27005	0.985793	1.27971	0.974094	0.230311	0.206483	0.0604945	0.141004	0.536824
3.18_169.045				169.045		3.18	40	15	15	10	0.343751	0.311187	0.362554	0.523225	0.373832	0.304805	0.276351	0.401961	0.202153	0.419533	0.650044	1.03838	0.529771	0.673218	0.599238	0.311166	0.319001	0.328986	0.613933	0.373168	0.266677	0.250476	0.314595	0.748874	0.292159	0.33065	0.316815	0.325041	0.291853	0.249384	0.237235	0.270273	0.217693	0.428096	0.213614	0.198753	0.213241	0.191578	0.277873
3.07_169.045				169.045		3.07	40	15	15	10	0.431594	0.408602	0.509733	0.645619	0.498762	0.4555	0.560819	0.53084	0.277625	0.539075	0.74033	1.48541	0.813477	0.882921	0.828925	0.401318	0.466424	0.325693	0.811942	0.50029	0.37252	0.306237	0.410702	0.74444	0.419256	0.41442	0.431106	0.433133	0.386773	0.326511	0.272377	0.327528	0.234533	0.513742	0.230054	0.241134	0.253106	0.235029	0.307618
4.63_170.094				170.094		4.63	37	15	15	7	0.170834	0.20837	0.147183	0.188891	0.198602	0.184955	0.177802	0.183564	0.128899	0.141773	0.11062	0.135501	0.205646	0.178464	0.237388	0.259616	0.206226	0.208876	0.257154	0.16524	0.20022	0.233736	0.177562	0.266015	0.113114	0.13953	0.164179	0.142049	0.104579	0.161297	0.0750029	0.0490313	0.0601288		0.158254	0.143181	0.24059	0.142127
3.52_172.073				172.073		3.52	40	15	15	10	0.37639	0.335889	0.703804	0.550943	0.476024	0.412381	0.589157	3.00894	0.314246	0.656459	0.7662	1.4324	0.64254	0.729246	0.492702	0.346681	0.390251	0.453047	0.702497	0.338442	0.360532	0.289734	0.333917	0.647424	0.326962	0.330719	0.589095	0.300803	0.330782	0.311791	0.41922	0.307483	0.240028	0.384978	0.236843	0.201106	0.149007	0.288094	0.346778
1.31_172.085				172.085		1.31	30	15	15	0	0.18131	0.1388	0.124197	0.370568	0.355017	0.151219	0.543253	0.248621	0.261629	0.286064	0.391343	0.363632	0.401469	0.41748	0.545768	0.0841447	0.147328	0.106428	0.200299	0.174654	0.138489	0.156008	0.230357	0.138801	0.222081	0.274728	0.298863	0.319812	0.27948	0.340979
3.2_173.105				173.105		3.2	40	15	15	10	2.3864	1.26163	0.232666	2.17148	2.752	1.41549	3.14604	0.216882	2.09593	2.49292	2.95889	1.69862	2.67309	2.07721	2.72938	0.269813	0.240155	0.0958516	0.273741	0.181477	0.193585	0.178641	0.158963	0.306863	0.147188	0.145207	0.126711	0.10514	0.111445	2.11173	1.26856	1.37806	0.492334	0.361748	0.294989	0.436784	0.152265	0.245846	0.164216
3.07_173.105				173.105		3.07	40	15	15	10	2.3864	1.243	1.55501	2.1738	2.7542	1.41437	3.14709	2.05931	2.09595	2.4826	2.95719	1.70674	2.67553	2.06477	2.7289	1.26918	1.67005	1.07084	3.14216	1.38998	1.57006	2.01125	1.58936	2.62953	1.90263	1.70808	1.62746	1.35652	1.69774	2.11173	0.239276	0.237071	0.133349	0.0861113	0.10482	0.169469	0.052881	0.0922624	0.0565937
3.01_173.105				173.105		3.01	40	15	15	10	0.557495	0.272112	0.267341	0.589128	0.766696	0.408078	0.972372	0.707398	0.681951	0.848284	1.00532	0.688226	0.947985	0.65936	0.851258	0.297506	0.443572	0.296635	1.00841	0.443485	0.432544	0.695586	0.547418	1.06448	0.92974	0.697416	0.855144	0.668816	0.702263	0.913568	0.239147	0.236469	0.133248	0.0886698	0.107585	0.169469	0.0508149	0.0924253	0.0576785
0.92_173.963				173.963		0.92	40	15	15	10	0.286305	0.16723	0.278219	0.266445	0.243566	0.117416	0.253246	0.181093	0.137883	0.142423	0.164504	0.12931	0.215528	0.191726	0.173432	0.222265	0.326623	0.170684	0.368952	0.485071	0.304033	0.206403	0.322471	0.301366	0.272065	0.190229	0.289803	0.251183	0.21711	0.166322	0.1127	0.146601	0.143018	0.189761	0.215241	0.170933	0.159577	0.127107	0.0757503
3.64_174.089				174.089		3.64	33	15	15	3	0.863306	0.43566	0.460452	0.744231	0.721586	0.676194	1.31777	2.4842	1.05551	1.28439	1.49574	0.470303	1.3612	1.0029	0.575453	0.412723	0.346278	0.385334	0.968117	0.481865	0.420433	0.649211	0.361114	0.9307	0.537324	0.389693	0.66505	0.229397	0.359136	0.661587	0.0751179	0.0530949		0.105598
3.39_174.089				174.089		3.39	40	15	15	10	0.710655	0.682196	1.68542	0.598362	0.626905	0.667627	0.599471	7.81395	0.304045	0.364145	0.973151	1.97255	0.763395	1.31592	0.996841	1.08739	0.907806	0.64967	2.26977	1.20061	0.934698	0.840991	0.740186	0.864372	0.418251	1.0791	1.39785	0.721158	0.627838	0.601144	0.570537	0.543665	0.466899	0.881814	0.770561	0.766873	0.61971	0.550534	0.44535
1_176.032		C6H8O6	176.032	176.032	0.1	1	37	12	15	10	0.526023	0.449664	0.467677		0.247905	0.333448	0.615349	0.492876	0.364671	0.340719	0.422222	0.372227			0.224308	0.409432	0.297351	0.211786	0.418156	0.298782	0.224953	0.432739	0.439494	0.42904	0.241114	0.251992	0.231109	0.20464	0.27025	0.346234	1.8367	1.7483	2.64628	1.2317	0.296861	0.309078	0.0921616	0.299565	0.342109
1.49_176.032		C6H8O6	176.032	176.032	0.1	1.49	28	12	13	3	0.429635			0.207449	0.453373	0.058994	0.499281	0.250837	0.435515	0.23559	0.102835	0.161103	0.257334	0.131902		0.0733425	0.18328	0.142709	0.248181	0.149766	0.217755	0.171665	0.119095	0.194978	0.137116		0.202186		0.0978007	0.140288	0.029472	0.0322851	0.029228
0.86_178.048				178.048		0.86	33	15	15	3	1.03704	0.722099	0.796217	0.937511	0.873677	0.568219	1.26347	0.820371	0.372972	0.687101	0.97196	0.88476	0.769339	0.733847	0.446834	0.574996	0.826119	0.410645	0.534353	0.594835	0.532874	0.502598	0.860482	0.7739	0.529299	0.576117	0.72537	0.195617	0.332494	0.48752	0.0906946	0.102522	0.132486
0.77_178.048				178.048		0.77	33	15	15	3	0.491702	0.277835	0.319273	0.468476	0.395469	0.293671	0.704752	0.510193	0.174448	0.268719	0.447103	0.327655	0.375826	0.409543	0.210665	0.341523	0.512606	0.212664	0.38088	0.216603	0.26952	0.275804	0.35481	0.571511	0.39456	0.377042	0.492123	0.0983498	0.17795	0.373833	0.0962773	0.101357	0.133159
0.51_178.048				178.048		0.51	40	15	15	10	3.60565	2.69938	2.6754	3.6661	3.97719	2.70967	6.02485	4.36818	4.14258	4.37977	5.72879	3.30219	3.39685	3.17624	2.9508	2.88132	3.03003	2.45014	4.20887	3.18015	3.20717	4.99946	4.38522	5.55119	3.30036	3.54206	3.81617	2.94463	2.86474	4.13695	3.22241	3.21183	5.49836	4.98321	2.69329	2.67208	1.83295	2.70762	1.92419
4.98_178.099				178.099		4.98	40	15	15	10	0.169935	0.180432	0.246911	0.277116	0.232297	0.198628	0.226416	0.240003	0.128806	0.144461	0.237311	0.251754	0.285595	0.320412	0.280368	0.215857	0.222128	0.203402	0.313048	0.215877	0.214984	0.111561	0.183059	0.184389	0.185403	0.173617	0.199992	0.193401	0.17767	0.139253	0.137631	0.111271	0.142149	0.239797	0.157117	0.1184	0.134584	0.135883	0.150709
0.93_180.008				180.008		0.93	33	11	14	8	0.036051				0.0325572		0.665511	0.247755	0.394556	0.751314	0.84958	0.40217	0.539744	0.486642	0.585514	0.0752547	0.0515796		0.0437692	0.202787	0.223877	0.59682	0.691906	0.62727	0.592544	0.449936	0.39749	0.307857	0.531056	0.837876	1.19657	1.41262	1.50858	0.95285	0.477177	0.580723		0.398119
2.96_180.062				180.062		2.96	30	15	15	0	1.04459	0.429932	0.968007	0.500768	0.542692	0.830674	1.36879	0.650067	0.883019	0.440412	0.726389	0.366789	0.704628	0.869627	1.08629	0.310492	0.403769	0.483785	0.42963	0.517175	0.323914	0.500063	0.121162	0.573035	0.510932	0.563344	0.591513	0.378562	0.409094	0.395303
2.41_180.062				180.062		2.41	28	14	14	0	0.455087		0.16965	0.439606	0.402527	0.294725	0.329948	0.376421	0.46703	0.401884	0.616343	0.538882	0.700472	0.719102	0.483869	0.175123	0.254299	0.154061		0.166043	0.276597	0.322515	0.83997	0.319781	0.186545	0.651724	0.649719	0.497018	0.330444	0.166517
5.39_180.115				180.115		5.39	40	15	15	10	0.241506	0.24577	0.343679	0.304488	0.275796	0.249846	0.328087	0.22275	0.163103	0.232002	0.287277	0.318703	0.407409	0.408115	0.332888	0.180279	0.205708	0.211469	0.341739	0.234069	0.211058	0.1697	0.179953	0.21927	0.197988	0.209544	0.194246	0.257417	0.213839	0.151539	0.116248	0.121529	0.119613	0.299003	0.165386	0.137993	0.133955	0.143659	0.167823
2.3_181.038				181.038		2.3	20	0	10	10																					0.0874157	0.107319	0.120712	0.105994	0.172483	0.214822	0.117974	0.260812	0.128658	0.156353	0.207676	0.165817	0.545436	0.46984	0.592988	0.262682	0.784171	0.75779	0.348651
3.1_182.021				182.021		3.1	31	15	13	3	0.138248	0.114487	0.114937	0.15374	0.169555	0.137986	0.419561	0.24168	0.245189	0.252094	0.328068	0.203558	0.290299	0.267593	0.195465	0.110825			0.1407	0.159431	0.119742	0.175041	0.183607	0.215296	0.133649	0.14097	0.149965	0.17018	0.18509	0.55929	0.0491201	0.0483119	0.0399321
0.6_182.027				182.027		0.6	30	15	15	0	0.48482	0.233266	0.305898	0.489287	0.395645	0.276818	0.777301	0.455578	0.49312	0.525791	0.522044	0.53684	0.690902	0.372366	0.682681	0.267505	0.132295	0.192069	0.451569	0.280643	0.26565	0.447543	0.332868	0.460297	0.464053	0.374552	0.45602	0.395605	0.470287	0.403095
1.65_183.053				183.053		1.65	30	15	15	0	5.27233	1.58809	0.866175	5.63338	8.18938	3.10731	9.37037	6.41754	6.64824	6.49626	9.1244	6.95503	6.08843	3.68291	3.78312	1.49809	3.14331	1.64009	4.26975	2.21163	2.36115	2.78794	2.00074	3.14787	2.21433	2.01898	2.40631	1.21943	1.40724	1.46862
6.37_184.182				184.182		6.37	33	14	15	4	0.180476	0.135653	0.146874	0.156005	0.124293	0.136364	0.292607	0.214614	0.143759	0.189127	0.24153	0.152732	0.149443		0.140964	0.362586	0.306285	0.243392	0.45198	0.240789	0.194178	0.154054	0.143293	0.605544	0.19231	0.212759	0.159115	0.131057	0.110718	0.143347					0.325437	0.239832	0.119933	0.251006
4.29_185.99				185.99		4.29	40	15	15	10	0.51769	0.668906	0.761186	0.844373	0.712572	0.616138	0.728174	0.664469	0.296894	0.470168	0.65745	0.665351	0.841005	1.00548	1.13782	0.616326	0.708813	0.61197	1.12724	0.804109	0.672122	0.349977	0.577579	0.581786	0.611288	0.460559	0.564832	0.553777	0.520135	0.43162	0.348825	0.302998	0.326355	0.7607	0.421509	0.390879	0.377545	0.403065	0.550006
4.11_186.126				186.126		4.11	21	0	14	7																0.216936		0.117164	1.46865	0.555208	0.785619	3.35667	2.43294	3.46698	1.94755	0.707899	0.516463	0.492504	0.6184	0.427448	0.0526238	0.0311164	0.0979694		0.322639	0.451211	0.110639	0.122814
3.23_187.121				187.121		3.23	40	15	15	10	1.25966	1.74782	2.09843	0.515719	1.47077	1.77617	0.812478	5.60792	0.369353	0.571892	0.523736	1.37097	1.91105	1.79194	0.64031	1.02859	1.04735	1.74083	1.6631	0.531978	1.0871	0.280444	1.71286	0.640004	1.00735	0.359751	1.96052	1.19093	1.07211	0.302169	1.32825	0.587413	0.500189	0.538537	1.2579	1.09086	0.389385	0.990172	0.270624
1.22_188.049				188.049		1.22	30	15	15	0	0.294914	0.288146	0.314047	0.365817	0.450482	0.349048	0.464999	0.370603	0.253793	0.303983	0.389223	0.409492	0.409556	0.417084	0.352089	0.270485	0.29874	0.271503	0.535589	0.444947	0.323379	0.225641	0.225355	0.289268	0.280528	0.249661	0.26516	0.164958	0.146166	0.0672756
0.59_188.079				188.079		0.59	38	14	15	9	1.00979	0.710002	0.851254	0.558949	0.792764	0.649789	0.687769	0.33035	0.306699	0.26141	0.360989	0.296934	0.265146	0.288938		0.57292	0.806536	0.546941	0.441739	0.561444	0.336142	0.288443	0.280827	0.454191	0.275438	0.245706	0.316344	0.277956	0.33641	0.292833	0.75435	0.728143	0.30286	0.386812	0.255506	0.308882	0.121773	0.2509
3.82_188.105				188.105		3.82	40	15	15	10	2.07212	1.98445	5.43785	2.58335	2.4547	2.10146	2.13494	23.1066	1.3148	1.9561	2.08592	4.92882	3.04016	3.01205	3.13298	2.37711	2.35478	2.00761	3.56991	2.58781	2.33381	1.70618	1.93254	2.20503	2.14246	2.24058	2.94999	2.03883	1.70637	1.77852	1.16607	1.0879	0.946157	2.03979	1.43462	1.5017	1.36538	1.43407	1.33954
4.28_188.141				188.141		4.28	38	15	15	8	0.310896	0.251353	0.357827	0.33685	0.21246	0.177573	0.347172	0.476174	0.197697	0.348067	0.557437	0.284292	0.320771	0.305944	0.336037	0.348945	0.207172	0.367663	0.979606	0.43093	0.625865	1.60976	0.845545	1.82537	0.592874	0.337681	0.355146	0.250882	0.189634	0.18816	0.0515782	0.0404139	0.124271	0.0959625	0.56987	1.37885	0.134677	0.13832
0.92_189.063				189.063		0.92	39	15	15	9	1.03537	0.596919	0.419552	0.563651	0.532246	0.742145	0.611505	0.272597	0.244355	0.222632	0.2871	0.408355	0.545944	0.189015	0.226697	0.30127	0.525335	0.316176	0.218962	0.239549	0.217582	0.131197	0.185492	0.190581	0.137441	0.0970039	0.150525	0.199096	0.199596	0.10729	0.268975	0.250424	0.225425	0.142385	0.153889	0.151356	0.0879824	0.134728
0.58_189.064				189.064		0.58	40	15	15	10	2.58877	1.21731	2.70904	1.39549	1.44891	0.94727	3.76235	2.82504	2.85967	2.24587	2.38946	2.04778	1.18846	1.14723	1.26724	1.44318	1.41206	1.18922	1.87858	3.12051	1.16431	2.88852	5.21134	2.51569	2.04032	1.84356	2.68521	1.74649	1.58973	1.05375	0.475943	0.4917	0.50907	0.462935	0.427891	0.507764	0.349803	0.445347	0.103021
1.5_190.048				190.048		1.5	35	15	15	5	0.66761	0.317705	0.390141	0.416176	0.621362	0.269998	0.714749	0.5424	0.585333	0.489698	0.435381	0.385251	0.268415	0.205014	0.183676	0.280807	0.392052	0.223535	0.360834	0.336839	0.351345	0.434819	0.297015	0.347584	0.237838	0.177389	0.220869	0.121332	0.192209	0.335395	0.167943	0.109593	0.176409	0.139993
2.45_190.084				190.084		2.45	33	15	15	3	0.368943	0.259967	0.390894	0.336753	0.602346	0.323173	0.621679	1.14881	0.386885	0.457569	0.644558	0.41536	0.375791	0.349186	0.429561	0.228687	0.271864	0.173498	0.374474	0.367871	0.320702	0.23939	0.202935	0.254811	0.203102	0.1694	0.17678	0.115428	0.23232	0.181943	0.16493	0.147625	0.061721
2.04_191.061				191.061		2.04	33	15	15	3	0.304905	0.331317	0.361854	0.370676	0.520445	0.2676	0.848936	0.529407	0.414306	0.347839	0.557797	0.340606	0.419095	0.395934	0.314133	0.226301	0.310428	0.247205	0.309502	0.42166	0.221504	0.280206	0.372567	0.370788	0.22039	0.271047	0.237535	0.159322	0.204944	0.39833	0.0357033	0.0386495	0.0443723
0.73_194.032				194.032		0.73	39	15	15	9	5.06355	2.87482	3.94584	3.03558	3.71093	2.4321	4.94329	1.87752	2.26107	1.47784	2.12407	1.7858	2.92691	3.57173	3.55078	2.30423	3.04678	1.38865	1.45754	2.06721	1.11251	0.505284	0.944405	0.477214	0.763992	0.718763	0.800398	0.853803	1.52656	0.84087	0.759025	0.72696	0.35234	0.229351	0.241955	0.414306	0.0836875	0.195549
0.7_194.079				194.079		0.7	39	15	15	9	0.388583	0.782953	0.616961	0.944452	0.965872	0.477067	0.830641	0.781601	0.560538	0.313612	0.723002	0.797132	0.587707	0.4485	0.563299	0.598857	0.646558	0.605131	0.766781	0.683868	0.727081	0.767526	0.66185	0.543777	0.381727	0.516054	0.79303	0.630768	0.532487	0.478329	0.112516	0.112739	0.227465	0.428403	0.0912592	0.0867763		0.0851744	0.194641
0.51_194.079				194.079		0.51	38	15	15	8	0.46365	0.876681	0.833961	1.3681	1.53785	1.18052	1.47989	1.58915	1.07477	0.99645	1.45112	1.33724	1.21782	1.24607	1.29515	1.00116	1.05122	1.39956	1.34951	1.42453	1.11181	1.78799	0.898397	1.49162	0.937605	1.19573	1.6417	1.12377	0.793665	0.835093	0.518924	0.423795	0.424941	0.479557	0.169016	0.237627		0.119723
4.9_194.094				194.094		4.9	40	15	15	10	0.593716	0.674697	0.917733	0.94243	0.77261	0.750342	0.916773	0.915409	0.474175	0.612493	0.887164	0.921189	1.05087	1.164	0.963709	0.562471	0.687219	0.599283	0.960785	0.787633	0.556547	0.422911	0.597055	0.761303	0.618173	0.556947	0.643352	0.64837	0.552289	0.432759	0.321729	0.317458	0.3547	0.811387	0.492455	0.384482	0.411214	0.375176	0.529825
2.62_194.105				194.105		2.62	24	0	15	9																0.178805	0.120693	0.108882	0.567729	0.323811	0.271019	0.785225	0.656465	1.03731	0.691661	0.478436	0.451316	0.434766	0.415144	0.442586	0.271193	0.252668	0.267935	0.210788	0.988593	1.20376	0.828634	0.766358
1.08_195.057				195.057		1.08	34	15	15	4	2.6415	1.70923	1.12272	4.23258	8.04226	1.8662	15.2884	7.09342	8.09707	15.969	11.1393	13.9508	5.62308	1.33916	1.5404	4.71218	1.04203	0.324685	3.40463	1.51971	3.10535	3.52829	3.50373	4.69779	3.69421	2.29853	3.86646	5.88881	2.10495	9.67899	0.266945	0.25764	0.0780373		1.64622
5.45_195.09				195.09		5.45	40	15	15	10	2.37935	3.17742	3.64963	3.84496	3.29454	3.73375	3.75554	3.54233	2.03894	2.58457	3.58894	6.24179	4.58645	5.87123	4.46616	2.80092	2.84341	2.68023	4.40304	3.34857	2.80041	1.83602	2.54245	3.14398	2.96549	2.2126	2.90575	2.96125	2.64807	2.04022	1.79158	1.60367	1.72057	3.409	1.88815	1.81023	2.085	1.71416	2.28545
3.75_195.965				195.965		3.75	40	15	15	10	0.60066	0.849056	0.939097	1.05533	0.913337	0.854209	0.837356	0.764288	0.379425	0.637456	0.803314	1.07393	1.24863	1.18974	1.13203	0.716956	0.77027	0.695394	1.10983	0.862175	0.735914	0.440475	0.729542	0.735918	0.718819	0.604993	0.61951	0.725203	0.615837	0.421002	0.313112	0.385166	0.325979	0.844331	0.476392	0.455296	0.462311	0.433157	0.623771
2.74_196.073				196.073		2.74	30	15	15	0	0.57866	0.499086	0.605848	0.47621	0.658564	0.377838	0.822708	0.548782	0.523684	0.563286	0.73461	0.404497	0.498845	0.636632	0.617888	0.279485	0.32468	0.23715	0.315846	0.426137	0.390848	0.303518	0.253624	0.37985	0.157427	0.214603	0.25795	0.177175	0.32149	0.361945
5.31_196.147				196.147		5.31	40	15	15	10	0.655541	0.486495	1.38477	1.0619	0.805555	0.629314	0.729198	2.45782	0.354356	0.492477	0.688357	1.73241	1.61042	1.03452	1.00413	0.552428	0.637479	0.563094	1.37779	0.543006	0.796487	0.476906	0.481325	0.828904	0.6259	0.611689	0.982686	0.516351	0.502457	0.395614	1.23864	0.714685	0.366974	1.04235	0.469271	0.346242	0.300668	0.714585	0.612449
3.75_197.961				197.961		3.75	40	15	15	10	0.58711	0.690128	0.765801	0.948817	0.671486	0.649179	0.687135	0.616882	0.350132	0.429721	0.741462	1.0011	1.01581	1.18751	0.814596	0.51314	0.586488	0.581267	0.905628	0.739434	0.433369	0.396738	0.46001	0.522273	0.441447	0.562594	0.476738	0.566452	0.616703	0.311722	0.288682	0.263492	0.270509	0.627774	0.396987	0.323851	0.408324	0.381468	0.429144
3.76_197.991				197.991		3.76	40	15	15	10	0.341046	0.543968	0.577923	0.637347	0.520911	0.456643	0.584283	0.335258	0.27046	0.337521	0.554958	0.696742	0.74185	0.735987	0.632117	0.418637	0.527035	0.439787	0.83671	0.544782	0.355307	0.304627	0.385866	0.426147	0.426241	0.339432	0.398143	0.438743	0.459638	0.276101	0.283131	0.268876	0.244449	0.682426	0.320497	0.319648	0.342992	0.320784	0.43844
4.54_198.068				198.068		4.54	40	15	15	10	0.426524	2.07909	1.5652	1.74665	0.841525	2.42293	1.07138	3.9128	0.869863	0.8658	2.44802	7.49125	1.61706	7.91034	1.02959	2.34702	0.8543	1.91149	1.50816	1.51794	1.50591	1.07018	1.06874	4.3892	1.6417	1.07143	4.18228	2.21277	2.04713	1.40131	3.34531	0.676157	1.64356	0.87224	1.18879	1.17465	0.614507	2.1863	1.31218
1.64_200.014				200.014		1.64	34	15	15	4	0.115088	0.119904	0.554269	0.202889	0.115741	0.122877	0.142629	7.90334	0.0767779	0.102861	0.155569	1.24229	0.202771	0.168683	0.1453	0.0844793	0.112045	0.090301	0.193005	0.242676	0.148459	0.0394356	0.101065	0.130785	0.106718	0.120808	0.502766	0.162846	0.114177	0.0721044	0.112034	0.0410431	0.0607872
4.06_200.105		C10H16O4	200.105	200.105	-0.14	4.06	33	8	15	10	0.102553		0.140648				0.068897	0.067197	0.0734539	0.139513		0.11126		0.181202		2.9799	1.3715	1.40557	10.8023	6.27393	6.06474	9.70813	6.22359	11.9681	5.16248	4.83415	2.3178	1.8238	1.72967	1.31663	3.94199	4.56032	5.51349	3.47218	4.41774	8.14187	1.09161	1.61839	0.0603223
0.92_201.979				201.979		0.92	40	15	15	10	0.832112	0.568026	1.05148	0.741071	0.828869	0.654641	0.758057	0.875664	0.477001	0.426378	0.516659	0.565754	0.974741	0.81019	0.950003	0.827393	0.865986	0.682312	1.83573	1.30913	1.39786	0.885814	1.11175	0.807044	0.970976	0.716998	0.802509	0.889525	0.746761	0.609431	0.38284	0.419633	0.370261	0.506029	0.720824	0.514233	0.517517	0.431024	0.269991
1.63_202.046				202.046		1.63	34	15	15	4	0.229406	0.995523	0.752862	0.509673	0.491025	0.457242	0.167431	0.0471482	0.0555196	0.202618	0.343442	0.319597	0.244539	0.968077	0.259106	0.276874	0.30004	0.194737	0.352942	0.313284	0.395614	0.351429	0.830669	0.159257	0.937973	0.0579793	0.131621	0.140844	0.0515723	0.0719016	0.167731	0.0955158	0.0456571	0.163133
4.19_202.12				202.12		4.19	40	15	15	10	0.382795	0.437632	0.770662	0.548934	0.487474	0.454624	0.443588	3.1686	0.222635	0.274836	0.357094	0.949146	0.634562	0.757134	0.705001	2.51747	1.36259	1.39386	8.96406	5.20528	5.35189	6.97787	3.83631	10.705	3.52879	2.61862	1.7968	1.52421	0.959298	0.715482	1.45355	1.73137	3.07835	1.70358	3.06382	6.36749	0.807666	0.960776	0.313169
1.74_202.132				202.132		1.74	40	15	15	10	0.482011	0.239017	0.220115	0.449025	0.465756	0.284452	0.507841	0.416337	0.315175	0.339593	0.314918	0.239708	0.358204	0.298293	0.66196	0.457028	0.442939	0.291159	0.91646	0.634602	0.513654	1.03376	0.890214	1.39406	1.01037	0.839603	0.699319	0.707618	0.713893	0.758954	1.95798	1.98955	2.63974	2.47598	2.02967	1.97702	0.878638	1.97915	0.399663
1.5_204.009				204.009		1.5	39	15	15	9	0.723478	0.224944	0.204313	0.428642	0.910789	0.329249	0.938778	0.564496	0.688549	0.609856	0.459391	0.26691	0.28991	0.286827	0.353275	0.278754	0.356534	0.254993	0.432954	0.393409	0.411031	0.476481	0.389332	0.420919	0.283718	0.331891	0.289459	0.225064	0.393356	0.528947	0.0657011	0.081327	0.065227		0.093752	0.0688644	0.0791197	0.105857	0.0795267
1.22_204.021				204.021		1.22	33	15	15	3	0.482724	0.679323	0.714668	0.908201	0.749649	0.578219	0.74349	0.625323	0.562305	0.518086	0.763656	0.734685	0.768389	0.878879	0.621123	0.553816	0.587486	0.549566	1.01586	0.783241	0.592152	0.390307	0.434275	0.610215	0.560177	0.432521	0.506048	0.352081	0.267228	0.156949	0.0666451	0.0459946	0.0494487
0.77_204.027				204.027		0.77	33	15	15	3	0.561107	0.483635	0.5408	0.848154	0.700211	0.497335	0.960409	0.888602	0.658862	0.865306	0.92435	0.564442	0.614969	0.652728	0.748094	0.422088	0.433425	0.505628	0.535381	0.534494	0.504811	0.454032	0.548914	0.710309	0.410455	0.345583	0.578268	0.462273	0.457325	0.692676					0.100169		0.107127	0.118902
1.54_204.062				204.062		1.54	40	15	15	10	0.258974	0.400161	0.394532	0.44204	0.662897	0.505831	0.513021	0.289892	0.474	0.623438	0.592365	0.693471	0.590638	0.469687	0.623378	0.328036	0.333472	0.234319	0.466056	0.569282	0.300763	0.339626	0.353114	0.523922	0.295633	0.355364	0.366474	0.180357	0.165756	0.28022	0.981099	0.999313	0.922104	0.758953	0.165853	0.159007	0.0504346	0.195112	0.081786
2.01_204.064				204.064		2.01	40	15	15	10	0.269129	0.195901	0.17566	0.27701	0.286657	0.166845	0.423399	0.376688	0.283991	0.313416	0.331369	0.338891	0.215616	0.247651	0.32466	0.16459	0.185035	0.139618	0.238128	0.182406	0.251158	0.223969	0.258583	0.19997	0.170988	0.163247	0.274675	0.190493	0.242652	0.429419	0.156572	0.182942	0.2315	0.162392	0.0770942	0.0501929	0.0399995	0.0975273	0.0917043
2.6_204.079		C12H12O3	204.079	204.079	-0.36	2.6	30	15	15	0	0.516774	0.44535	0.817952	0.541352	0.45517	0.626483	0.904893	0.65417	0.624705	0.641042	0.587978	0.321874	0.453172	0.628719	0.664897	0.297549	0.267007	0.295324	0.187102	0.403015	0.286486	0.303858	0.224088	0.377331	0.194604	0.304444	0.454506	0.200521	0.389572	0.440932
3.14_204.1				204.1		3.14	34	15	15	4	0.345221	0.179113	0.252776	0.337182	0.511177	0.23488	0.531069	0.648884	0.236751	0.37543	0.549809	0.334835	0.350857	0.212126	0.296156	0.204643	0.308497	0.139217	0.406022	0.353614	0.226568	0.151088	0.250577	0.248949	0.153244	0.118733	0.13839	0.0667855	0.136487	0.116441	0.0580177	0.0372677				0.0821588	0.0622465
3.93_205.955				205.955		3.93	29	5	14	10								0.0771608	0.0545022	0.0785067	0.0989578	0.107989				0.0778659	0.101633		0.185919	0.178505	0.145854	0.15698	0.224328	0.196623	0.229819	0.239226	0.181204	0.245988	0.249168	0.144414	1.28958	1.13294	1.08918	1.0796	0.625578	0.575312	0.223535	0.550687	0.264486
0.92_206				206		0.92	40	15	15	10	0.351989	0.349814	0.526032	0.491105	0.428864	0.287103	0.511385	0.371591	0.244292	0.317135	0.412348	0.333015	0.478402	0.443743	0.438841	0.402289	0.486384	0.359517	0.988555	0.858325	0.57363	0.339583	0.515342	0.497832	0.558521	0.401848	0.485013	0.507667	0.452953	0.344188	0.174513	0.176088	0.145877	0.384166	0.372315	0.325753	0.301362	0.267664	0.158565
1_206.042				206.042		1	28	8	11	9	0.0674596	0.109374	0.117139		0.0787559		0.147847		0.11208	0.0892461	0.136392					0.607288	0.974882	0.632502	0.34471	0.402013	0.355183	0.144246		0.252084	0.0987488		0.0878374			0.0804371	13.7572	14.514	5.36802	3.58709	0.182989	0.26472	0.0500775	0.110159
1.21_206.043				206.043		1.21	35	10	15	10	0.349521			0.117398	0.195587	0.103303	0.217574	0.158642	0.0568281	0.139901	0.105272	0.124307				0.215905	0.228554	0.0744309	0.265465	0.182135	0.17288	0.254415	0.224956	0.273401	0.222505	0.167511	0.202393	0.162967	0.120758	0.151068	1.66844	1.36987	0.930038	0.632485	0.451164	0.454833	0.275804	0.483952	0.178856
2.14_206.079				206.079		2.14	30	8	12	10	0.127281				0.125626	0.0873134	0.165146	0.122963	0.103743	0.106227	0.172472					0.171423	0.137914			0.119813	0.134463	0.0876182	0.081011	0.0693228		0.0639895	0.0399032	0.0597831	0.0818351	0.063389	0.85107	0.682854	0.699245	0.9263	0.224833	0.178757	0.0737369	0.123797	0.0980728
1.31_206.079				206.079		1.31	38	15	15	8	0.251488	0.17608	0.215759	0.57693	0.586903	0.323577	0.814221	0.416501	0.571592	0.532256	0.938035	0.619109	0.649452	0.632445	0.533197	0.204748	0.223422	0.170343	0.313937	0.208571	0.313184	0.249373	0.179588	0.146063	0.197607	0.198064	0.207706	0.164692	0.186344	0.236804	0.533225	0.523241	0.395733	0.312011	0.0918153	0.138663		0.0664371
4.64_206.094				206.094		4.64	20	0	14	6																0.0745284	0.0861184		0.54709	0.420777	0.281604	1.62931	1.98594	1.23883	2.86562	2.15486	0.716093	1.36096	1.61091	2.40178	0.0656207	0.0642583	0.0775204		0.0770941	0.0429979		0.0546203
3.68_206.094				206.094		3.68	15	0	15	0																1.096	1.38708	1.1043	5.89932	4.41362	2.81894	10.7582	9.28755	13.1919	9.79589	11.6402	6.67371	9.3468	6.69481	13.0182
3.25_207.089				207.089		3.25	40	15	15	10	1.70133	1.02124	0.910571	1.57826	1.97646	1.0701	2.50431	1.69267	1.43891	1.70381	1.92782	1.30273	1.76406	1.39518	1.68402	0.764738	0.963856	0.683963	1.55484	0.759626	1.06783	1.12763	1.18167	1.14793	0.774266	1.04798	0.963901	0.696612	1.14667	1.7575	0.245777	0.245319	0.200932	0.191696	0.290993	0.264882	0.177635	0.335758	0.128377
2.76_208.057				208.057		2.76	29	15	14	0	0.384461	0.291194	0.251173	0.609779	0.733072	0.411351	1.13971	0.821755	0.571481	0.697972	0.92895	0.625106	0.687648	0.603285	0.603462	0.156309	0.127824	0.171499	0.258921	0.185025	0.207084	0.112777	0.0902578	0.252729		0.0413653	0.135973	0.0506857	0.0383053	0.0793333
0.65_208.058				208.058		0.65	39	15	15	9	6.05762	2.44522	3.3753	4.24896	4.20586	3.31283	6.18016	3.20655	4.75	4.79921	3.73159	4.0053	4.93392	3.58294	3.05058	2.16511	3.23475	2.30809	3.20741	2.09091	3.18473	3.67904	3.22968	3.74422	3.81749	2.92704	2.87982	2.10678	1.88501	2.33958	0.408461	0.412678	0.630408	0.306883	0.427099	0.416125	0.205302	0.308824
0.56_208.058				208.058		0.56	39	15	15	9	2.95364	1.3284	1.89611	2.43923	2.5429	1.66553	3.3921	1.56993	2.28853	2.47556	2.43713	2.16016	4.93392	1.96944	2.11147	1.18872	1.71715	1.16563	1.7845	1.10985	1.63193	1.87337	1.79806	2.2817	3.81793	2.92704	1.63943	1.35861	1.17035	1.24461	0.408461	0.412678	0.630408	0.306883	0.427099	0.416125	0.203458	0.308824
2.81_208.071				208.071		2.81	30	15	15	0	0.427959	0.255406	0.307868	0.369021	0.309889	0.447481	0.740321	0.495975	0.369084	0.407655	0.64992	0.389465	0.487964	0.52247	0.264797	0.158835	0.141057	0.230765	0.227656	0.219588	0.228534	0.230373	0.185837	0.421598	0.127178	0.276067	0.402414	0.152856	0.226144	0.33937
3.58_208.072				208.072		3.58	30	15	15	0	0.340148	0.286489	0.437068	0.202234	0.215657	0.227924	0.335359	0.260338	0.200005	0.216793	0.233492	0.172412	0.326429	0.617281	0.361264	0.354984	0.345358	0.299674	0.349885	0.207916	0.211984	0.22433	0.123578	0.448353	0.181327	0.223675	0.150179	0.0860612	0.171787	0.194855
3.73_208.073				208.073		3.73	30	15	15	0	0.306664	0.123868	0.214531	0.249188	0.259992	0.227056	0.430583	0.40039	0.331316	0.317566	0.307325	0.179324	0.163984	0.233977	0.248672	0.119078	0.145079	0.142714	0.184566	0.134964	0.182335	0.164485	0.143501	0.292479	0.106063	0.0926082	0.137404	0.0768286	0.114564	0.131969
1.08_208.095				208.095		1.08	30	15	15	0	0.891537	0.669908	0.95498	1.60028	1.55676	0.723475	1.5999	1.5669	1.04059	1.20949	1.44194	1.23935	0.937938	0.357813	0.400558	0.506049	0.687978	0.398519	1.49549	0.697702	0.72667	0.470091	0.586047	0.866225	0.645254	0.437319	0.638851	0.517891	0.37634	0.271602
3.47_208.11				208.11		3.47	10	0	0	10																															0.253913	0.278948	0.660223	0.583207	0.270427	0.295847	0.227116	0.284428	0.126332
5.17_208.146				208.146		5.17	40	15	15	10	0.169082	0.175432	0.186458	0.224472	0.179218	0.21381	0.208892	0.177637	0.142991	0.156657	0.2066	0.256754	0.285967	0.239651	0.240667	0.158502	0.233904	0.160983	0.259363	0.217532	0.153298	0.118448	0.137688	0.192409	0.134817	0.17499	0.133594	0.178071	0.149497	0.123629	0.146677	0.134399	0.122213	0.187358	0.101119	0.0914669	0.0986668	0.0992833	0.121848
5.59_209.105				209.105		5.59	40	15	15	10	0.122552	0.099703	0.141578	0.144785	0.10806	0.122934	0.198294	0.232392	0.108438	0.135097	0.234597	0.246831	0.178936	0.204347	0.13268	0.170416	0.136975	0.149471	0.232887	0.119631	0.138379	0.0707888	0.112156	0.188212	0.132748	0.128849	0.118632	0.103963	0.0837721	0.0932067	0.135	0.113743	0.111363	0.122032	0.15219	0.114392	0.108355	0.14943	0.0799688
0.75_210.02				210.02		0.75	30	9	13	8					0.0593317		0.249228	0.409155	0.180399	0.29596	0.215294	0.0826491		0.344511	0.372465	0.0594609			0.103027	0.0605644	0.0627845	0.178497	0.159004	0.138386	0.177699	0.259228	0.248345	0.200272	0.270226	0.491623	0.339466	0.291519	0.372639	0.34492	0.162759	0.109868		0.12083
3.75_210.042				210.042		3.75	40	15	15	10	0.852931	1.13491	1.39092	1.55542	1.25478	1.44714	0.942597	0.742542	0.556067	0.65034	1.07205	1.40762	1.73219	1.8679	1.51671	1.01397	1.13954	1.23547	2.01899	1.27071	0.988073	0.547567	1.00989	0.85854	0.549371	0.866529	0.923175	1.04695	0.882704	0.609443	0.578097	0.456548	0.502994	0.832336	0.491379	0.656022	0.767571	0.719759	1.08243
3_210.051				210.051		3	30	15	15	0	0.278374	0.234549	0.249381	0.368636	0.333424	0.24244	0.476308	0.404067	0.289059	0.314354	0.359561	0.262608	0.266492	0.230265	0.33568	0.131875	0.230982	0.193994	0.294384	0.199471	0.212739	0.173985	0.234355	0.300916	0.194854	0.17419	0.184486	0.0968172	0.168084	0.24017
1.25_210.055				210.055		1.25	30	15	15	0	0.434377	0.262818	0.351457	0.629271	0.483966	0.340032	0.568901	0.476508	0.55242	0.445117	0.571162	0.637436	0.415541	0.25482	0.269312	0.188959	0.404444	0.255013	0.35028	0.38074	0.209157	0.262985	0.230266	0.263191	0.306447	0.229739	0.259784	0.161852	0.289457	0.228627
4.39_210.1				210.1		4.39	40	15	15	10	0.231084	0.168932	0.602151	0.241707	0.238657	0.193106	0.259792	1.11329	0.179979	1.65991	0.233092	1.32651	0.415761	0.350158	0.299387	0.144994	0.442859	0.176314	0.338652	0.251544	0.177815	0.214602	0.180865	0.214784	0.12511	0.134763	0.29897	0.210251	0.176842	0.158579	0.113376	0.139865	0.108911	0.681823	0.190707	0.111744	0.105196	0.112443	0.248665
4.98_210.162				210.162		4.98	40	15	15	10	0.516825	0.282736	1.18531	0.638262	0.663395	0.200408	0.276121	2.24356	0.15383	0.136646	0.334341	1.74863	1.57257	0.325218	0.950942	0.305637	0.199821	0.223078	1.0266	0.315206	0.732316	0.147422	0.149705	0.294623	0.421364	0.328247	0.412701	0.160412	0.129062	0.181071	1.04644	0.761775	0.0982193	1.30907	0.140959	0.182715	0.181675	0.305738	0.191106
2.89_212.032				212.032		2.89	30	15	15	0	0.633855	0.692558	0.666415	0.629358	1.4177	1.21041	2.06902	1.51594	1.42769	2.08992	1.54893	0.82441	1.20111	1.32455	1.08057	0.429699	0.340448	0.368928	0.445155	0.758895	0.944943	0.529201	0.515566	1.45432	0.352408	0.433689	0.692294	0.581469	0.717755	1.63385
3.26_212.069				212.069		3.26	34	15	15	4	0.222022	0.611575	0.641303	0.441326	0.462058	0.095236	1.2039	1.29051	0.816265	0.380995	0.447659	0.289326	0.384191	1.50421	0.198225	0.446378	0.330456	0.15581	0.338327	0.492933	0.0528915	0.0698568	22.139	1.53488	0.209031	0.340618	0.152728	0.12426	0.548239	0.0386106		0.0422469	0.0354197			0.0368505		0.0586309
1.51_212.079				212.079		1.51	39	14	15	10	0.087483		0.0960257	0.122595	0.143447	0.134155	0.13913	0.123126	0.109051	0.145595	0.193889	0.110124	0.161403	0.151692	0.205864	0.139343	0.0772102	0.0690956	0.182529	0.15421	0.119875	0.100076	0.150512	0.159512	0.156716	0.145226	0.119373	0.167336	0.139482	0.19102	0.102062	0.0982055	0.106111	0.118657	0.188241	0.121986	0.135062	0.169127	0.0904511
1.22_212.08				212.08		1.22	35	15	11	9	0.402666	0.135834	0.199549	0.187575	0.424163	0.122825	0.47217	0.249875	0.210497	0.216033	0.20301	0.191535	0.206102	0.164433	0.270644	0.124907	0.12522	0.182161	0.211627	0.308449	0.212308	0.119065	0.0982329	0.219256		0.191351				0.066172	0.182817	0.201177	0.223507	0.289388	0.0912899	0.0783342	0.0862188	0.125606
4.08_214.022				214.022		4.08	40	15	15	10	0.677748	0.175968	1.22659	0.698755	0.474214	0.677437	0.69724	0.685206	0.433517	0.472442	0.788914	1.02767	0.977971	0.882359	0.883014	0.516494	0.6068	0.546954	1.0271	0.860264	0.852298	0.211634	0.44704	0.448776	0.49703	0.565764	0.629465	0.48199	0.331898	0.282215	0.510423	0.559198	0.206312	0.482592	0.284379	0.216291	0.413775	0.238493	0.421837
1.61_214.095				214.095		1.61	22	0	12	10																0.0965323			0.263984	0.171941		0.270101	0.213167	0.346291	0.376592	0.225311	0.225879	0.200266	0.257281	0.141981	0.307666	0.343811	0.403924	0.310231	0.284184	0.236403	0.148088	0.343058	0.0954088
2.87_214.97				214.97		2.87	40	15	15	10	0.417138	0.704487	3.1052	0.546842	0.579447	0.478925	0.73869	20.4121	0.542149	0.61516	0.713623	1.2073	1.04642	1.06027	0.664691	0.577619	0.672797	0.610447	1.02988	0.741379	0.649906	0.417464	0.597085	0.614548	0.555853	0.512426	2.31804	0.608221	1.24542	0.441904	1.34287	0.307472	0.184638	0.853207	0.252577	0.277227	0.366493	0.373939	0.484555
4.01_215.152				215.152		4.01	40	15	15	10	0.170507	0.197215	0.349641	0.298421	0.25172	0.223034	0.24902	2.4147	0.139376	0.179489	0.238238	0.595173	0.298705	0.280668	0.351868	0.17654	0.208849	0.157662	0.333132	0.190019	0.164116	0.110779	0.217995	0.144285	0.135626	0.145101	0.300936	0.206773	0.188277	0.161172	0.193848	0.0986973	0.0946723	0.176517	0.103409	0.0734591	0.119279	0.164567	0.143537
0.92_215.925				215.925		0.92	32	8	15	9	0.180799		0.117487		0.167665		0.256581	0.114837	0.101625	0.124911	0.12892					0.214172	0.218749	0.068389	0.390711	0.375329	0.291908	0.19598	0.309982	0.338465	0.250309	0.147277	0.201332	0.163369	0.141188	0.163276	0.190125	0.225505	0.182633	0.162993	0.269446	0.234157	0.14774	0.206106
4.52_216.136				216.136		4.52	40	15	15	10	0.430938	0.398968	1.06577	0.553433	0.425442	0.431935	0.525407	2.70525	0.325261	0.490847	0.557562	0.803252	0.668208	0.735276	0.691542	0.449248	0.437297	0.389649	0.737645	0.450595	0.397741	0.291103	0.368831	0.419489	0.428582	0.394924	0.502642	0.430672	0.339419	0.283553	0.250907	0.187729	0.215229	0.454029	0.280672	0.258862	0.272284	0.249112	0.250892
2.75_216.147				216.147		2.75	40	15	15	10	0.660545	0.39062	0.233242	0.523899	0.589106	0.286581	0.539274	0.365023	0.349863	0.396258	0.377275	0.324771	0.305142	0.185757	0.496989	0.459627	0.488053	0.328139	0.917162	0.722443	0.520333	0.716012	0.611631	1.25039	0.597125	0.399014	0.38199	0.3195	0.25289	0.256662	2.25293	2.2956	2.331	1.95371	0.881886	1.36034	0.221341	0.820505	0.142173
2.63_216.148				216.148		2.63	40	15	15	10	0.642472	0.426557	0.311543	0.720174	0.81378	0.426388	0.864918	0.687805	0.485349	0.683613	0.700888	0.469096	0.585429	0.40195	0.892874	0.737288	0.609494	0.453352	1.29192	0.910037	0.70292	1.43341	1.34536	2.23461	1.76047	1.54358	1.07548	1.36239	1.31182	1.45419	3.67025	3.88959	4.94391	4.55134	3.69163	3.61193	2.19478	3.76705	0.747697
0.73_218.024				218.024		0.73	38	15	15	8	0.649571	0.963162	1.49964	1.57942	1.57645	1.23053	0.98518	0.853312	0.914059	0.626698	1.29449	1.06308	1.61764	1.73168	2.03773	0.943184	1.1825	0.740783	0.68894	0.846041	0.504933	0.243627	0.428204	0.221318	0.407963	0.346843	0.318582	0.454255	0.84284	0.523089	0.365368	0.322156	0.205338	0.103649	0.0920876	0.141647		0.0558434
2.12_218.069				218.069		2.12	27	6	12	9			0.140635				0.119217	0.226714	0.144314	0.226836	0.135038								0.238954	0.244611	0.116606	1.30239	0.287945	1.48813	0.876004	0.922167	0.491891	0.306654	0.331848	0.454835	0.201141	0.184906	0.262452	0.177191	0.164925	0.17635	0.0605043	0.0987267
3.37_218.115				218.115		3.37	24	0	15	9																0.203815	0.159865	0.0882364	0.52144	0.22552	0.357965	0.423476	0.277915	0.709525	0.28793	0.329425	0.17536	0.20066	0.0808257	0.106482	0.409902	0.575176	0.977958	0.671583	0.0811929	0.138125	0.0435261	0.0371945
1.01_219.069				219.069		1.01	24	4	10	10			0.103055			0.100631		0.125801	0.0751298							0.112746	0.0873267		0.190145	0.201424	0.10983	0.0596081	0.170117	0.0997563	0.104703	0.0963997					0.147541	0.156505	0.0588456	0.312463	0.088286	0.156077	0.0967433	0.0742206	0.120394
3.54_220.037				220.037		3.54	21	3	9	9								0.090369	0.121423						0.13342							0.0886695	0.137164	0.173893	0.239477	0.228069	0.134094	0.123001	0.117507	0.165771	0.075978	0.0995813	0.0721973		0.914374	0.240282	0.220397	1.15588	0.461106
1.57_220.058				220.058		1.57	28	8	11	9	0.131951				0.126408		0.190956	0.144026	0.146779	0.07908	0.105504	0.0439238				0.0872769	0.103587		0.155797	0.0764155		0.123831	0.0836849	0.103141	0.129313	0.0519057			0.0760795	0.0668564	0.854363	0.767687	0.697368	0.371089	0.187058	0.181625	0.0535351	0.217567
1.31_220.058				220.058		1.31	30	15	15	0	1.15256	0.442393	0.451896	0.830536	1.30571	0.549662	1.75562	1.1607	1.52826	1.27069	1.49022	0.750974	0.637786	0.59685	0.523148	0.448106	0.648289	0.386811	0.6439	0.835517	0.729896	0.90582	0.61398	0.788445	0.609113	0.566891	0.493641	0.313337	0.510809	0.60275
5.26_220.11				220.11		5.26	25	0	15	10																0.651594	0.561711	0.35242	0.826834	1.09386	0.768248	0.592319	0.52093	0.88512	0.360261	0.544499	0.332945	0.525264	0.25244	0.38996	9.14026	8.25251	9.3135	7.54835	4.39917	2.87514	1.45826	4.4116	1.07296
4.29_220.11				220.11		4.29	15	0	15	0																0.19129	0.17404	0.154284	0.728713	0.698857	0.488736	0.587697	0.783009	0.890194	0.177577	0.380357	0.31201	0.56806	0.253201	0.979865
4.12_220.11				220.11		4.12	12	0	12	0																			0.332874	0.248285	0.190534	0.509371	0.695115	0.886868	0.451712	0.816512	0.377974	0.700024	0.526885	1.29368
0.74_222.037				222.037		0.74	29	14	15	0	0.110381	0.298273	0.277551	0.371704	0.23743	0.274922	0.334409	0.437737	0.346448	0.373478	0.504508	0.232136	0.146006	0.335634		0.20618	0.180755	0.126306	0.193237	0.338996	0.151955	0.383542	0.246855	0.310226	0.265246	0.135405	0.220927	0.230422	0.170155	0.260859
1_222.038				222.038		1	35	15	15	5	0.613918	0.288254	0.324326	0.325612	0.416589	0.265094	0.441724	0.323949	0.289253	0.447609	0.604252	0.16997	0.148844	0.335465	0.317793	0.345317	0.420871	0.245712	0.174097	0.541268	0.451676	0.402565	0.408652	0.310387	0.176026	0.315409	0.29047	0.315576	0.442828	0.752605	0.132643	0.137882	0.387635	0.300862
1.47_222.056				222.056		1.47	30	15	15	0	1.02203	0.435452	0.393908	0.993704	1.53144	0.785501	1.61235	1.15948	1.38022	1.15354	1.76456	1.36366	1.26492	0.776091	0.739335	0.412642	0.686647	0.369461	0.98937	0.544499	0.644587	0.566881	0.42292	0.696618	0.463104	0.366193	0.464986	0.291481	0.354663	0.353825
1.02_222.056				222.056		1.02	29	15	14	0	0.49033	0.202327	0.110491	0.495585	0.664229	0.428203	0.978195	0.563235	0.641263	0.622671	0.860248	0.728818	0.71626	0.37319	0.336746	0.223841	0.387999	0.157234	0.582765	0.341914	0.246932	0.245603	0.0999652	0.373051	0.257658	0.202391	0.246576	0.127539	0.195752
4.06_222.087				222.087		4.06	18	0	9	9																0.301376			1.06147	0.4983	0.560034	0.903725	0.556849	0.973175	0.456047	0.455755					0.374782	0.449285	0.602121	0.37443	0.495682	0.76886	0.115716	0.175048
3.2_222.087				222.087		3.2	29	14	15	0	0.419391	0.144418		0.408102	0.432835	0.330563	0.760491	0.734716	0.611353	1.21116	0.991734	0.719046	0.600365	0.629408	0.658432	0.174605	0.195093	0.110324	0.337632	0.253397	0.269081	0.36803	0.239704	0.708795	0.426476	0.427244	0.332913	0.4133	0.34481	0.384226
2.6_222.089		C12H14O4	222.089	222.089	0.21	2.6	30	15	15	0	0.535015	0.465593	0.794686	0.577477	0.433766	0.586008	0.953878	0.661938	0.582877	0.664957	0.612665	0.3435	0.453889	0.5823	0.618214	0.296117	0.271593	0.328217	0.201657	0.42737	0.275826	0.275225	0.238082	0.371495	0.190655	0.306465	0.442078	0.196992	0.403465	0.427066
5.21_222.139				222.139		5.21	40	15	15	10	0.630211	0.772598	1.04022	0.949974	0.992976	0.73306	0.912512	0.702645	0.461534	0.586595	0.791849	0.815217	0.999918	1.32042	1.16446	0.613178	0.729203	0.789369	1.27455	0.795915	0.612097	0.453028	0.582288	0.646976	0.616333	0.584807	0.686327	0.69866	0.640726	0.5893	0.386852	0.36702	0.375761	1.02268	0.479548	0.420114	0.487935	0.444565	0.603133
5.28_222.16				222.16		5.28	40	15	15	10	0.247195	0.329471	0.366999	0.428208	0.305216	0.479115	0.400366	4.2714	0.253701	0.324137	0.446285	1.24182	0.396155	0.72102	0.351063	0.412554	0.310368	0.403844	0.316877	0.344835	0.285015	0.231143	0.339178	0.765598	0.369749	0.359375	0.623912	0.34521	0.332295	0.270553	0.320399	0.170912	0.267954	0.246307	0.300805	0.244948	0.254325	0.346835	0.29663
6.04_222.162				222.162		6.04	40	15	15	10	0.736021	0.880894	0.919554	1.32206	0.966916	0.941147	1.44308	0.719016	0.634249	0.813181	1.0255	0.96466	1.14864	1.34907	1.25702	0.793932	0.848705	0.776743	1.28775	1.05242	0.895338	0.62631	0.836314	1.04134	1.01771	0.877587	0.799744	0.839881	0.695181	0.65391	0.517663	0.357467	0.453512	0.917642	0.718955	0.730761	0.71432	0.757326	0.724186
4.99_224.035				224.035		4.99	40	15	15	10	0.130384	0.199718	0.237463	0.292949	0.195987	0.176371	0.251352	0.196776	0.151689	0.159918	0.209924	0.157975	0.225449	0.264819	0.272719	0.156729	0.218298	0.207132	0.273052	0.254292	0.207182	0.104817	0.181548	0.124225	0.197687	0.145465	0.214012	0.190796	0.170129	0.138196	0.186022	0.092901	0.0987354	0.225598	0.15085	0.110306	0.115603	0.106654	0.240894
1.15_224.035				224.035		1.15	39	15	15	9	0.388046	0.192767	0.238116	0.266029	0.371566	0.144845	0.620026	0.542567	0.537057	0.659285	0.767724	0.642057	0.594546	0.541765	0.420963	0.207483	0.296098	0.161919	0.495851	0.197342	0.247866	0.407876	0.449191	0.321446	0.394653	0.504316	0.557371	0.400247	0.44948	0.768094	0.156964	0.208982	0.218472	0.117786	0.0721981	0.268089	0.0877528	0.111915
1.32_224.036				224.036		1.32	34	15	15	4	0.413406	0.217272	0.285759	0.384408	0.451558	0.269472	0.85004	0.538483	0.526961	0.644221	0.691193	0.465187	0.51989	0.518151	0.415107	0.245291	0.380439	0.179937	0.419672	0.351326	0.28213	0.30209	0.437655	0.341127	0.356841	0.277116	0.343489	0.239875	0.495903	0.666761	0.0530436		0.0775933	0.086841
1.03_224.036				224.036		1.03	39	15	15	9	0.399027	0.137981	0.192914	0.23865	0.198987	0.114352	0.231568	0.415429	0.206647	0.237738	0.257337	0.795219	0.503935	0.235073	0.109841	0.0985302	0.211961	0.223853	0.510759	0.191894	0.132956	0.229174	0.200949	0.256698	0.138164	0.157971	0.182599	0.136635	0.0969277	0.273304	0.153027	0.18674	0.223569	0.0960466	0.193843	0.370665	0.0467908	0.146942
0.56_224.089				224.089		0.56	35	15	15	5	0.564899	1.44213	0.796449	2.10748	1.44679	1.90476	1.36092	2.0125	1.03929	1.22078	1.31324	1.31357	1.97941	0.898641	1.66745	0.512798	0.676114	2.656	0.93654	1.30466	0.835136	0.706129	1.01343	1.62714	0.642092	0.911111	0.876266	0.990446	0.911032	0.78782		0.245162	0.252535	0.352731	0.325001				0.119055
4.49_224.105				224.105		4.49	40	15	15	10	0.29248	0.273142	0.369831	0.48784	0.379842	0.369491	0.56334	0.38209	0.309951	0.36443	0.5004	0.432687	0.522123	0.537442	0.513074	0.252576	0.282603	0.214393	0.513131	0.386892	0.263166	0.17699	0.294418	0.282061	0.220482	0.21626	0.281053	0.253952	0.232158	0.182916	0.116455	0.159931	0.133462	0.269386	0.163083	0.125975	0.165841	0.128949	0.195683
0.72_225.031				225.031		0.72	35	15	15	5	0.231563	0.275217	0.207683	0.520794	0.360372	0.479513	0.670489	0.492879	0.513781	0.639433	0.441924	0.469372	1.061	0.385595	0.65394	0.431581	0.278942	0.204602	0.564017	0.155649	0.310148	1.21674	0.710767	1.21554	0.541715	1.85638	1.0737	1.97628	0.997788	1.89048			0.0893145		1.68462	1.70508	3.55145	2.60048
5.41_225.1				225.1		5.41	40	15	15	10	0.281471	0.347907	0.448589	0.461526	0.359808	0.357875	0.410113	0.385105	0.219487	0.290414	0.368808	0.364818	0.46976	0.561825	0.488303	0.306809	0.333852	0.337169	0.543633	0.381969	0.296327	0.209478	0.297148	0.29186	0.322021	0.271925	0.306739	0.314907	0.27105	0.19572	0.18455	0.173624	0.171623	0.403655	0.21543	0.19805	0.223517	0.210953	0.278743
3.75_226.01				226.01		3.75	40	15	15	10	0.798766	0.915184	1.30786	1.21606	1.07482	1.05957	1.04521	0.895042	0.59238	0.647611	0.977319	0.798563	1.45343	1.51939	1.53491	0.785969	0.996789	0.922164	1.55776	1.01267	0.841946	0.6488	0.740784	0.804788	0.814685	0.757993	0.770694	0.916236	0.883451	0.488014	0.448461	0.497042	0.560207	1.20524	0.678783	0.520034	0.655819	0.60342	0.757786
1.72_226.095				226.095		1.72	40	15	15	10	0.173058	0.108936	0.241542	0.205945	0.235377	0.12331	0.323165	0.270087	0.153496	0.207065	0.289336	0.1292	0.223554	0.274401	0.259598	0.160514	0.153773	0.0943923	0.280258	0.201296	0.194448	0.376773	0.305283	0.430497	0.342336	0.27221	0.318456	0.314375	0.237764	0.262607	0.337197	0.328176	0.432159	0.392884	0.246469	0.172994	0.200721	0.291097	0.173577
1.81_227.043				227.043		1.81	26	11	15	0	0.215469			0.143786	0.228489	0.117465		0.0562581	0.126056	0.183558	0.220076		0.197329	0.140636	0.163519	0.15927	0.192752	0.119731	0.357065	0.186135	0.163146	0.21784	0.463231	0.291516	0.482897	0.399582	0.295286	0.613636	0.654716	0.428551
1.65_227.043				227.043		1.65	30	15	15	0	35.5289	7.89616	4.19057	35.5719	56.9738	18.5267	68.3611	43.8596	48.1428	46.6366	66.6496	49.7293	39.7873	20.6111	22.9356	8.0909	19.0519	8.92649	25.3911	11.8398	14.4738	17.931	11.3162	19.9153	13.1092	11.7686	14.1481	6.5414	8.15258	8.39537
1.25_227.127				227.127		1.25	25	0	15	10																0.176511	0.102479	0.0859456	0.290664	0.222525	0.191692	0.267443	0.336555	0.476794	0.41629	0.371015	0.288064	0.424676	0.347504	0.390216	1.00002	1.12573	1.41161	1.48303	0.70512	0.906013	0.191714	0.716909	0.159479
1.65_229.048				229.048		1.65	29	14	15	0	0.343578	0.101077		0.408559	0.575887	0.241822	0.681724	0.499946	0.473689	0.477391	0.601806	0.482767	0.451451	0.280879	0.25565	0.120078	0.20239	0.11895	0.303937	0.164648	0.16985	0.219215	0.139571	0.242448	0.156761	0.154893	0.183155	0.125795	0.146801	0.110455
4.33_229.168				229.168		4.33	40	15	15	10	0.301923	0.250973	0.497829	0.264403	0.263402	0.231487	0.276698	2.79948	0.159954	0.180363	0.418534	0.823107	0.320943	0.350139	0.395648	0.207185	0.298394	0.179087	0.36867	0.251567	0.202929	0.187774	0.211132	0.275866	0.207152	0.197409	0.383189	0.254954	0.165048	0.138547	0.264188	0.138205	0.155243	0.227493	0.169326	0.097991	0.182369	0.288049	0.14182
0.73_229.977				229.977		0.73	36	15	15	6	1.07111	0.760445	0.984394	0.588374	0.712149	0.482167	0.742241	0.378137	0.515017	0.254266	0.319884	0.29735	0.441685	0.561065	0.659112	0.574624	0.766555	0.406738	0.337665	0.480413	0.225817	0.0932272	0.175571	0.119294	0.127493	0.109396	0.168462	0.137912	0.226007	0.119961	0.127781	0.139987	0.0350004		0.0571018	0.0718174		0.0771376
1.89_230.025				230.025		1.89	30	15	15	0	0.333939	0.304738	0.565699	0.62765	0.49112	0.437361	0.768572	0.65417	0.322209	0.504762	0.676233	0.484411	0.537807	0.570966	0.5521	0.289273	0.391781	0.232217	0.354514	0.381852	0.344127	0.255802	0.193718	0.367749	0.155299	0.30528	0.191871	0.228843	0.37118	0.423778
3.79_230.031				230.031		3.79	40	15	15	10	1.10624	1.34262	0.653181	1.85978	1.21045	1.29485	1.53043	1.10355	0.787641	0.973044	1.39895	1.84463	2.17977	2.43499	2.19964	1.2956	1.54425	1.03259	2.16157	1.34414	1.15208	0.650028	0.265145	1.30646	1.25144	0.996434	0.727459	1.27577	1.16096	0.717366	0.803854	0.791632	0.645253	1.71289	1.00903	0.905154	0.864925	0.90627	1.09936
3.73_230.031				230.031		3.73	40	15	15	10	0.439197	0.466326	0.642925	0.67921	0.552885	0.572782	0.610091	0.48588	0.247498	0.377623	0.467644	0.484778	0.660268	0.915503	0.779202	0.430536	0.542873	0.523215	0.847883	0.634624	0.442272	0.293009	0.416102	0.345495	0.468131	0.450021	0.514049	0.471594	0.364213	0.267713	0.260957	0.251213	0.266524	0.537979	0.314672	0.298499	0.377581	0.316245	0.384952
3.74_230.035				230.035		3.74	40	15	15	10	0.562775	0.832739	0.918698	1.04027	0.728913	0.768534	0.79638	0.730927	0.336316	0.401192	0.636593	0.914076	0.963681	1.22616	0.996755	0.583825	0.717741	0.715151	1.12383	0.805586	0.640645	0.389547	0.612039	0.511997	0.59965	0.576955	0.742777	0.620135	0.620687	0.373187	0.357653	0.367318	0.392148	0.795349	0.465606	0.352404	0.483685	0.472708	0.581891
4.83_230.152				230.152		4.83	40	15	15	10	0.377891	0.36688	0.703199	0.493375	0.421623	0.394881	0.391914	1.80544	0.263404	0.333448	0.464638	0.683873	0.543097	0.546821	0.587648	0.352245	0.442229	0.368032	0.64927	0.475913	0.369852	0.234591	0.28508	0.35372	0.32667	0.330881	0.409087	0.323902	0.299477	0.238121	0.1785	0.210755	0.167984	0.347833	0.198801	0.187409	0.204763	0.221725	0.239998
0.51_231.919				231.919		0.51	29	15	14	0	0.939234	1.18497	1.07221	0.930583	0.759031	0.644307	0.658159	0.298917	0.407428	0.40707	0.399207	0.46159	0.866279	0.772842	0.54669	0.675931	0.75159	0.702821	0.640625	0.56273	0.397665		0.409343	0.210298	0.351622	0.218716	0.31079	0.250774	0.379573	0.274792
1.22_232.017				232.017		1.22	37	15	15	7	1.69283	1.3073	2.48096	2.68804	1.67815	1.31755	1.84002	1.7751	1.54711	1.04885	2.59387	1.56499	2.51445	2.96701	2.25957	1.93248	2.19013	1.67533	3.29687	1.14329	0.617384	1.21595	1.41179	1.27977	1.67355	1.4295	0.544556	1.24703	0.943159	0.479872	0.164844	0.144859	0.131476	0.208022		0.0579035		0.0546657
1.59_233.065				233.065		1.59	36	11	15	10	0.080633	0.105403	0.133356	0.139413	0.0964512	0.126021	0.109763	0.104753	0.0715395	0.1509	0.0763538					0.180708	0.148191	0.0608716	0.377536	0.247536	0.218729	0.230344	0.194174	0.322024	0.309488	0.2799	0.204081	0.160558	0.117048	0.116687	0.568543	0.558065	0.505761	0.792275	0.614833	0.522296	0.310695	0.5063	0.186725
0.73_233.994				233.994		0.73	34	15	15	4	0.769921	0.949292	1.15439	1.43963	1.16057	0.822935	1.17095	0.71564	0.640233	0.538226	0.793432	0.860009	1.19658	1.42487	1.52255	0.860473	1.07236	0.83653	0.759668	0.927341	0.435622	0.195774	0.375143	0.253103	0.36357	0.362897	0.358436	0.399534	0.61304	0.180684		0.0504203				0.0554868		0.0497315
0.92_233.995				233.995		0.92	40	15	15	10	0.432894	0.718074	0.736739	0.727787	0.71013	0.505393	0.876947	0.764911	0.47147	0.455387	0.731202	0.534283	0.845797	1.06966	0.87983	0.872518	0.769936	0.496091	1.71312	1.44486	1.04552	0.636653	0.99658	0.935197	0.94225	0.687877	0.970365	0.905497	0.804383	0.641755	0.352244	0.381762	0.315082	0.79252	0.757399	0.533157	0.515195	0.571954	0.306529
2.24_234.11				234.11		2.24	40	15	15	10	0.473956	0.253358	0.231363	0.917411	0.864129	0.476198	1.19477	0.80018	0.909303	1.18651	1.51475	1.53515	1.39647	1.23779	0.964239	0.164388	0.167335	0.182012	0.407733	0.270968	0.272969	0.289507	0.183296	0.326005	0.252901	0.226621	0.22998	0.167822	0.157051	0.152541	0.191365	0.17054	0.0993068	0.126647	0.0796438	0.129962	0.201764	0.0902332	0.0606963
5.89_234.162				234.162		5.89	40	15	15	10	2.59565	2.82974	3.23295	4.85188	3.05417	2.94656	4.51148	0.384423	2.07349	2.63729	3.36869	3.3466	3.55489	4.06878	3.9676	2.62403	2.93369	2.70836	4.2486	4.03166	2.52051	2.09146	2.40051	3.30879	3.34073	2.46744	2.4435	2.54936	2.22531	1.88873	1.88233	1.74936	1.36999	3.7157	2.65891	2.48978	2.07247	2.89665	1.88017
1.65_236.035				236.035		1.65	30	15	15	0	0.410256	0.133041	0.276711	0.497177	0.804252	0.371041	1.55739	0.736067	0.643193	0.557699	0.723267	0.516573	0.469067	0.365857	0.666267	0.103221	0.172424	0.111486	0.255458	0.133957	0.202613	0.176464	0.176552	0.219309	0.128792	0.164852	0.120186	0.113442	0.14301	0.285967
2.12_236.079				236.079		2.12	30	8	14	8	0.154154		0.11932				0.339312	0.172673	0.128572	0.18673	0.233674	0.0983722				0.128026	0.162433		0.222877	0.220431	0.170405	0.552889	0.190228	0.713447	0.493626	0.444035	0.289267	0.246389	0.280463	0.247891	0.122586	0.127104	0.163096	0.156785	0.130233	0.154667		0.0993335
5.05_236.104				236.104		5.05	22	0	12	10																0.319526	0.271708	0.144693	0.152034	0.383763	0.242739	0.0735387	0.111381	0.137677	0.0572504	0.081008				0.0829915	8.41986	7.06984	10.4095	8.42334	1.69441	0.780208	0.0940233	0.728161	1.16102
5.13_237.149				237.149		5.13	40	15	15	10	0.163941	0.190911	0.224906	0.281388	0.195038	0.225296	0.211623	0.229997	0.111614	0.160311	0.230582	0.220991	0.279329	0.285924	0.249494	0.154206	0.201141	0.192535	0.285907	0.229718	0.178151	0.12095	0.161151	0.174687	0.178271	0.148799	0.173417	0.174502	0.154972	0.1318	0.105409	0.106718	0.0903874	0.245292	0.138829	0.13098	0.122745	0.120263	0.160178
1.74_238.051				238.051		1.74	29	15	14	0	0.107316	0.128969	0.220399	0.167711	0.218868	0.124675	0.714786	0.461359	0.330391	0.270124	0.423501	0.257601	0.244057	0.264587	0.233651	0.0824143	0.0835959	0.0818121		0.183584	0.11689	0.179865	0.267024	0.172621	0.123704	0.269221	0.154215	0.211462	0.298478	0.317473
2.62_238.096				238.096		2.62	25	0	15	10																2.7124	1.74234	1.37045	8.58988	3.85809	4.27352	11.7605	9.62142	14.3744	9.12873	6.95138	6.59687	6.5143	5.46547	6.06596	4.27728	3.81687	4.02491	3.26167	15.9272	18.5815	12.7852	11.236	0.414226
5.29_238.123				238.123		5.29	40	15	15	10	0.88881	0.804373	2.43025	1.33386	1.22132	1.19536	1.18552	17.3788	0.641426	1.26932	2.23048	1.26862	1.54762	1.5323	1.10502	0.871153	0.700696	0.77248	1.43978	1.54876	1.04194	0.589544	0.782059	0.966274	0.74536	0.602822	0.956363	1.13228	0.742761	0.565578	0.825131	0.693867	0.646713	1.29213	0.819426	0.519306	0.520618	0.54622	0.641106
3.47_238.157				238.157		3.47	24	0	14	10																0.116157	0.0794213		0.149092	0.0903912	0.0668926	0.0887719	0.101852	0.138775	0.132688	0.200793	0.127178	0.170622	0.121734	0.0700341	0.982928	1.01121	2.31051	2.08625	0.980654	1.2155	0.928276	1.10086	0.52091
1.65_238.96				238.96		1.65	30	15	15	0	0.213304	0.139835	0.0708367	0.278964	0.144478	0.218099	0.284569	0.243809	0.178162	0.223946	0.349305	0.272764	0.343676	0.325792	0.280968	0.137523	0.277056	0.14601	0.280562	0.167461	0.167691	0.113178	0.150799	0.211837	0.138146	0.143914	0.156576	0.125498	0.115204	0.101582
3.75_239.954				239.954		3.75	40	15	15	10	1.76397	2.20815	2.63655	3.14954	2.66484	2.47138	2.2492	2.18767	1.13226	1.64166	2.40537	3.21277	3.70093	3.4915	3.4177	1.98702	2.23919	2.24875	3.44753	2.47383	1.91329	1.17131	1.90216	1.8639	2.00935	1.71572	1.83532	2.07913	1.7375	1.25676	0.930735	1.0481	0.981179	2.19003	1.43424	1.20326	1.41312	1.28347	1.63266
1.11_240.067				240.067		1.11	30	15	15	0	3.42901	1.53383	0.997549	3.59688	4.08289	1.89836	6.6632	3.92339	3.54142	4.71516	5.47348	4.31475	4.31917	2.66027	2.88391	1.53351	2.21753	1.39858	3.08109	1.68569	2.12715	1.73216	1.908	2.18707	2.28644	1.85457	1.85167	1.49821	1.74295	1.85692
0.91_240.067				240.067		0.91	30	15	15	0	2.91334	1.63905	1.52891	3.56747	3.17468	2.20123	5.33451	3.61252	3.3867	4.31958	5.32521	4.56819	4.02661	3.30173	3.10619	1.44562	2.25465	1.30129	2.70955	1.85818	2.1182	1.94961	1.84246	2.12692	2.01293	1.61377	1.74327	1.45845	1.75236	1.84528
5.8_240.075				240.075		5.8	40	15	15	10	0.526475	0.422427	0.843619	0.951481	0.610265	0.500379	0.768356	0.632666	0.383521	0.474435	0.648232	0.759488	0.821541	1.03301	0.906587	0.4825	0.565593	0.465133	0.858497	0.848232	0.402067	0.334136	0.513403	0.537808	0.494404	0.44515	0.621635	0.497868	0.430343	0.325267	0.281	0.331424	0.362128	0.596956	0.338985	0.313738	0.312768	0.294583	0.394128
5.31_240.136				240.136		5.31	40	15	15	10	0.776693	0.563257	1.44473	1.29832	0.86902	0.783256	0.798869	2.95817	0.388128	0.667255	0.754204	2.08371	1.66507	1.10893	1.06264	0.657005	0.796114	0.726878	1.59101	0.761095	0.972372	0.548481	0.603762	0.969402	0.736554	0.709987	1.1091	0.613696	0.570397	0.402851	1.59091	0.953779	0.417963	1.25341	0.492777	0.447099	0.345066	0.832334	0.599281
3.75_241.952				241.952		3.75	40	15	15	10	1.54564	1.79008	2.21132	2.55878	2.11767	2.02281	1.81266	1.78894	1.02013	1.36989	1.95053	2.70799	2.58363	3.0967	2.79994	1.67333	1.90633	1.87518	2.95796	2.0641	1.6185	1.03515	1.53293	1.67419	1.60328	1.45648	1.59344	1.83513	1.60361	1.05622	0.703563	0.849533	0.786407	1.89137	1.24978	0.981368	1.17612	1.08273	1.54805
3.76_241.98				241.98		3.76	40	15	15	10	0.581675	0.832618	0.939691	1.04608	0.808706	0.841654	0.760142	0.681309	0.386993	0.490983	0.870556	1.26713	1.09547	1.3304	1.07118	0.694447	0.803095	0.717383	1.17009	0.894409	0.652981	0.412875	0.557931	0.764016	0.72603	0.589394	0.572373	0.727275	0.597745	0.449832	0.527414	0.461523	0.449411	1.06573	0.519599	0.491332	0.58773	0.530132	0.704924
3.3_242.115				242.115		3.3	30	15	15	0	0.709439	0.148272	0.282031	0.596657	0.398457	0.209704	0.290181	0.275411	0.238269	0.426405	0.436043	0.371767	0.256802	0.196212	0.367382	0.341056	0.26292	0.223779	0.591041	0.317001	0.268581	0.188812	0.259787	0.325109	0.285571	0.116084	0.222262	0.118622	0.188133	0.0726232
5.38_242.152				242.152		5.38	40	15	15	10	0.336154	0.176815	0.612465	0.394295	0.436722	0.257756	0.40025	1.49298	0.196085	0.336255	0.369478	0.757591	0.717426	0.509047	0.638672	0.359041	0.43704	0.253297	0.762994	0.412093	0.324914	0.201722	0.304839	0.351248	0.31611	0.319538	0.441285	0.384025	0.176807	0.228944	0.3054	0.28188	0.138359	0.594366	0.192705	0.145536	0.158465	0.219202	0.236541
1.81_243.069				243.069		1.81	40	15	15	10	0.215347	0.15085	0.335051	0.356763	0.364504	0.170782	0.531755	0.491686	0.284882	0.420336	0.571666	0.304457	0.352613	0.381187	0.344316	0.288741	0.25631	0.216275	0.580235	0.433257	0.343774	0.397341	0.394098	0.555925	0.264042	0.239504	0.345576	0.302764	0.31983	0.38303	0.985497	0.929711	0.834407	0.85352	0.532263	0.595193	0.125252	0.330508	0.0718035
4.63_243.184				243.184		4.63	40	15	15	10	1.88499	1.94401	3.40567	2.40723	2.18188	2.01578	2.11946	16.8752	1.25016	1.68341	2.51837	6.35304	2.95475	2.92329	3.10822	1.62114	1.87364	1.64757	3.21734	1.94179	1.72115	1.27367	1.60584	2.33983	1.67965	1.64015	2.27423	2.04644	1.32382	1.26383	1.52813	0.924393	0.98782	2.08741	1.18861	0.854703	1.20733	1.64465	1.21366
1.11_244.07				244.07		1.11	40	15	15	10	2.05407	1.367	3.75622	2.17014	2.27736	1.21364	4.67655	6.49245	2.2121	2.95053	1.93391	1.75158	1.43587	1.02086	2.2531	2.12498	1.95552	1.19379	4.25997	3.1206	2.68692	2.23769	1.8931	2.71586	2.04627	1.69788	1.43081	1.08788	1.72305	0.962692	3.57478	4.26032	3.72326	3.2042	2.16957	2.20621	0.505127	1.20409	0.496666
5.11_244.167				244.167		5.11	40	15	15	10	0.422316	0.469359	0.970063	0.55642	0.518228	0.523042	0.561231	2.7872	0.288801	0.453713	0.543408	0.89084	0.634436	0.661187	0.789918	0.413696	0.530505	0.422294	0.868989	0.566959	0.479852	0.342666	0.317962	0.448414	0.536974	0.428552	0.647697	0.372005	0.421813	0.281846	0.263505	0.166807	0.177116	0.404468	0.336932	0.25849	0.256124	0.264101	0.268151
6.37_244.203				244.203		6.37	40	15	15	10	0.186847	0.131002	0.193275	0.332825	0.122214	0.160735	0.304228	1.08486	0.142125	0.155739	0.157359	0.235441	0.172534	0.21458	0.257709	0.14318	0.133837	0.108836	0.281047	0.250712	0.127227	0.0976276	0.152083	0.207404	0.116251	0.11404	0.137293	0.120652	0.107027	0.057664	0.114282	0.11649	0.0574793	0.22533	0.0948425	0.0885372	0.102595	0.0930194	0.108405
6.18_244.203				244.203		6.18	39	15	15	9	0.154969	0.0939323	0.171858	0.249032	0.101912	0.161535	0.242697	0.587581	0.113736	0.136741	0.179534	0.185043	0.16995	0.192008	0.204692	0.109496	0.140526	0.0931398	0.276837	0.157505	0.0978524	0.0864727	0.166123	0.174656	0.133453	0.102084	0.108721	0.123488	0.0887426	0.0718854	0.096598	0.0838406	0.0362491	0.108796	0.0673653	0.0859503	0.069785	0.079811	0.0866585
1.16_245.138				245.138		1.16	24	0	14	10																0.208061	0.164235		0.325561	0.196301	0.197854	0.317724	0.269983	0.292967	0.291487	0.238539	0.181793	0.150523	0.151899	0.164165	1.19443	1.19026	1.32464	1.27152	0.967127	0.833525	0.474588	0.82262	0.251659
1.22_246.005				246.005		1.22	35	15	15	5	1.0594	0.853859	1.19343	1.42964	1.39322	0.957305	1.48594	1.36938	1.00131	0.990817	1.18624	1.10214	0.974043	1.06805	0.838089	0.845312	1.04669	0.79706	1.56063	1.45149	0.976556	0.706599	0.73654	1.00243	0.810534	0.706752	0.813794	0.477494	0.424519	0.313815	0.0615442	0.0592282	0.0648733	0.0886217
5.92_248.177				248.177		5.92	39	14	15	10	0.123419	0.116928	0.124902	0.260252	0.136733	0.144777	0.184885		0.120438	0.136656	0.154347	0.236757	0.194693	0.187355	0.182291	0.145098	0.139372	0.0978933	0.171636	0.153957	0.102585	0.107368	0.107944	0.211286	0.169586	0.133715	0.119149	0.125718	0.112311	0.101497	0.104339	0.108703	0.0928314	0.144891	0.126823	0.114703	0.093151	0.129556	0.0803418
1.34_249.067				249.067		1.34	25	0	15	10																0.171482	0.154497	0.0853674	0.299325	0.160139	0.177339	0.279682	0.295748	0.370408	0.222862	0.270875	0.24102	0.228263	0.144658	0.231069	3.0238	3.17246	4.28446	3.19745	0.509792	0.393124	0.148976	0.521066	0.365815
3.63_250.158				250.158		3.63	15	0	15	0																0.454386	0.669666	0.431594	0.814352	0.351655	0.478848	0.846824	0.869881	1.47946	0.886727	1.73679	0.820123	0.739106	1.07352	0.908227
2.94_251.079				251.079		2.94	30	15	15	0	0.899318	0.459321	0.416175	1.2824	0.872395	0.782029	1.4808	0.855083	0.812884	1.11145	1.19687	1.31046	1.75238	0.884761	0.763003	0.906147	1.24574	1.00003	2.08189	1.13598	0.802399	1.10614	0.97799	1.45954	1.40443	1.4147	1.07999	1.14443	1.01281	0.665966
6.25_251.152				251.152		6.25	40	15	15	10	0.984818	1.15038	1.20619	1.60441	1.12057	1.06977	1.74272	3.66406	0.741874	1.03685	1.45384	1.68768	1.50744	1.97074	1.63744	0.882216	1.0696	0.911663	1.45286	1.33147	0.944309	0.723759	0.785199	1.54658	1.23432	0.881573	0.90891	1.06664	0.923253	0.760727	0.855622	0.715072	0.68716	1.53831	0.914037	0.838478	0.781283	0.982564	0.856641
2.45_251.928				251.928		2.45	19	10	9	0	0.163907			0.65642			0.164072	0.725627	0.253001	0.434312	0.174789	3.28701	0.426505		0.167605	0.0859573		0.489304	2.15016	0.686514		0.0953786		0.129826	0.100175			0.105731		0.133519
0.65_252.048				252.048		0.65	30	15	15	0	2.97625	1.30447	1.61282	2.1596	1.67659	1.66769	3.30597	1.59792	2.42499	2.10839	1.7525	1.93175	0.989969	1.12482	1.57165	0.860462	1.83832	1.36153	1.52528	0.811165	1.53977	1.81011	1.57247	1.47787	1.21731	0.874844	1.42933	1.16059	0.723149	1.16303
1.65_252.063				252.063		1.65	36	15	15	6	0.491421	0.238813	0.297656	0.742397	0.686866	0.311452	0.45764	0.722442	0.583157	0.710139	1.14046	0.616571	0.737029	0.440788	0.754258	0.229787	0.218843	0.235929	0.429162	0.240275	0.490173	0.296257	0.340006	0.229902	0.103283	0.431436	0.175808	0.149495	0.0725118	0.385104	0.0397561	0.0525552	0.0641683		0.0542368			0.0649393	0.0604705
4.55_252.103				252.103		4.55	40	15	15	10	0.23436	0.0926968	0.227287	0.25107	0.108056	0.219715	0.247821	0.58649	0.0817596	0.221319	0.376267	0.419568	0.200653	0.660182	0.240097	0.212218	0.219076	0.234149	0.385666	0.130684	0.190939	0.127056	0.191857	0.160918	0.267139	0.149802	0.328693	0.181258	0.100492	0.0674137	0.219724	0.232766	0.0623746	0.303991	0.111602	0.0705267	0.121855	0.0866299	0.0977568
2.17_252.12				252.12		2.17	35	15	14	6	0.168144	0.131936	0.121802	0.261976	0.263516	0.168411	0.323297	0.950345	0.28575	0.372711	0.512795	0.310243	0.302097	0.312844	0.250497	0.111706	0.102018	0.0777846	0.190927	0.119757	0.0911623	0.0985694	0.119903	0.116481	0.0797556	0.0739797	0.086731		0.073645	0.0703083	0.111934	0.120908	0.0549412	0.0705768		0.0447964
1.44_252.121				252.121		1.44	29	14	15	0	0.107354	0.125011	0.324836	0.334058	0.129404	0.133384	0.305074	0.501576	0.367645	0.437428	0.245489	0.208139	0.158952	0.29853		0.128009	0.126187	0.0989483	0.194374	0.305974	0.143233	0.227452	0.249593	0.237621	0.131293	0.137763	0.239013	0.173462	0.138576	0.150872
4.8_252.135				252.135		4.8	40	15	15	10	0.188451	0.185209	0.274344	0.294714	0.25333	0.262753	0.251194	0.274219	0.143467	0.181905	0.24134	0.223543	0.330901	0.321201	0.29353	0.183434	0.187697	0.191533	0.330086	0.235109	0.221025	0.126351	0.194356	0.179286	0.161385	0.158942	0.195345	0.192758	0.158518	0.126611	0.117172	0.111596	0.116765	0.222489	0.13464	0.112328	0.143997	0.118088	0.148907
1.57_253.058				253.058		1.57	40	15	15	10	0.262537	0.111113	0.201409	0.288593	0.248485	0.104995	0.339526	0.264419	0.351731	0.205445	0.314705	0.22393	0.372805	0.240793	0.291262	4.87904	2.65063	1.3247	4.31221	4.67055	3.2716	1.69484	2.71771	1.92177	2.13538	1.15794	2.16926	0.436287	0.571784	0.277491	0.245234	0.268328	0.314498	0.663868	9.68481	5.5913	5.12679	12.2736	0.163753
1.46_253.059				253.059		1.46	39	14	15	10	0.259305	0.0896439	0.139857		0.325032	0.276364	0.27532	0.243577	0.19073	0.191288	0.236771	0.107072	0.295528	0.262373	0.293613	0.108092	0.164507	0.146546	0.140075	0.153209	0.144949	0.122597	0.08114	0.213074	2.04117	1.22555	2.04497	0.516728	0.519645	0.0945964	0.0940975	0.129933	0.0860389	0.64836	9.76034	5.59749	5.16136	12.2924	0.164419
1.58_253.071				253.071		1.58	35	10	15	10	0.19203		0.13735	0.0941699	0.128304	0.118046	0.253644	0.24428	0.159738	0.188027	0.194646					4.83732	2.59705	1.2907	4.31206	4.60786	3.22371	1.8037	2.69813	1.85404	2.05525	1.15967	2.11651	0.40903	0.470291	0.216239	0.273288	0.348591	0.294877	0.664682	9.79565	5.64831	5.14177	12.2788	0.165078
1.16_254.004				254.004		1.16	40	15	15	10	0.195588	0.403102	0.419252	0.408873	0.33271	0.375793	0.276359	0.176893	0.136725	0.222557	0.275343	0.312883	0.63929	0.802285	0.651954	0.259601	0.377898	0.403502	0.42603	0.474562	0.211982	0.119315	0.259031	0.211487	0.29838	0.274736	0.365462	0.36082	0.212518	0.253041	0.0630389	0.101639	0.0715877	0.423151	0.197261	0.180816	0.159289	0.183884	0.50509
0.95_254.046				254.046		0.95	30	15	15	0	0.975405	0.468788	0.477716	0.687034	0.769339	0.912116	1.14476	0.357928	1.22919	1.5496	1.95752	1.32047	1.4205	0.972575	0.703678	0.469976	0.724888	0.326093	1.11289	0.391026	0.722342	0.629418	0.607421	0.629107	0.481133	0.875557	0.575091	0.816487	1.12877	0.833952
1.08_254.101				254.101		1.08	30	15	15	0	18.0561	14.4972	19.313	35.0968	30.2311	15.9972	33.9047	33.4012	21.1042	26.1491	29.6942	25.6752	20.6131	9.03091	9.18704	11.7602	14.714	8.27581	30.4126	14.3469	14.9627	10.2059	11.8604	17.1956	13.2563	9.19772	12.4146	11.0954	8.63896	4.86096
1.98_254.126				254.126		1.98	22	0	12	10																0.0808767			0.13198	0.0880163		0.215443	0.153029	0.160416	0.209181	0.162958	0.125025	0.165299	0.0828176	0.126856	0.427989	0.404454	0.464391	0.497527	0.415869	0.294545	0.266855	0.447873	0.188399
4.98_254.152				254.152		4.98	40	15	15	10	0.544609	0.129588	1.1477	0.583574	0.621341	0.263746	0.275478	1.97423	0.134037	0.165222	0.259752	1.64482	1.41075	0.391868	0.878003	0.244579	0.211099	0.167594	1.05167	0.26148	0.667664	0.127456	0.185108	0.214814	0.382513	0.353579	0.466716	0.186853	0.12205	0.0962715	0.976914	0.690186	0.0870087	1.2894	0.132509	0.114178	0.13219	0.328523	0.149414
1.26_255.077				255.077		1.26	14	0	5	9																0.128734						0.0528267			0.0833237	0.0618693				0.0914513	0.106783	0.0868738	0.182879	0.161828	0.262835	0.236185	0.085159	0.246449
1.42_257.138				257.138		1.42	39	14	15	10	0.0922694		0.0815655	0.144589	0.130739	0.103286	0.203768	0.1527	0.117351	0.178501	0.2164	0.162572	0.196156	0.116066	0.223799	0.165561	0.139438	0.118439	0.291907	0.175599	0.193055	0.358995	0.313188	0.381097	0.367821	0.318711	0.297745	0.312162	0.244864	0.247725	0.653325	0.632078	0.732771	0.819656	0.674765	0.687545	0.41383	0.730778	0.242294
3.79_258.026				258.026		3.79	40	15	15	10	3.86234	4.92194	8.10485	8.92995	5.49077	6.85493	5.12028	4.07144	2.46833	3.39787	5.3678	5.76704	9.86973	8.27744	9.51588	4.55472	6.9077	4.70755	10.8733	5.26303	3.98039	3.46071	5.77176	4.47607	4.63243	3.99677	2.10278	4.65756	3.97864	2.74951	2.81282	2.80964	3.51277	5.55056	4.56709	3.01205	4.42734	4.30704	3.99089
3.74_258.026				258.026		3.74	40	15	15	10	1.18344	1.59236	8.10485	8.91691	1.64839	6.84632	1.58349	1.27429	0.823207	1.06627	1.41788	1.39871	9.83003	2.53995	9.5414	1.28056	6.90562	1.51841	10.8653	1.58628	1.23886	3.45922	5.77268	1.09373	6.24177	1.3548	1.35757	1.31614	1.17788	0.848181	0.798847	0.775994	3.5148	1.88941	4.56709	0.99096	4.41751	4.30242	1.36957
1.28_258.084				258.084		1.28	38	14	14	10	0.0839669	0.0821199	0.166369	0.136644	0.186732	0.0539438	0.0998332	0.194067	0.156082	0.104611	0.194649	0.197414	0.141373	0.118975		0.0611653		0.0749133	0.236518	0.108511	0.116955	0.111196	0.107538	0.0793859	0.123961	0.125905	0.167827	0.116305	0.149552	0.0492038	0.751793	0.75504	0.533106	0.406974	0.164161	0.189845	0.0675759	0.10397	0.0639258
4.65_258.089				258.089		4.65	30	15	15	0	1.06133	1.19722	3.19938	1.33038	0.872398	2.05405	6.97941	3.34966	2.03297	2.02693	3.0643	1.73391	2.32227	7.31331	4.11597	0.621123	0.513587	1.3476	0.377636	1.02299	0.739823	0.539252	0.597319	1.48787	0.506709	0.830836	1.84428	0.470318	0.944181	2.33196
2.85_258.11				258.11		2.85	30	15	15	0	0.357083	0.264186	0.301487	0.495188	0.486298	0.255485	0.594028	0.377687	0.362678	0.391232	0.488338	0.304341	0.351537	0.273803	0.447166	0.263134	0.22826	0.165988	0.284469	0.197526	0.197972	0.260007	0.233757	0.300229	0.204811	0.123908	0.240871	0.121695	0.172821	0.129479
5.38_258.183				258.183		5.38	40	15	15	10	0.281947	0.256134	0.394929	0.407382	0.290636	0.299076	0.296624	0.88594	0.211061	0.212453	0.341386	0.420349	0.370126	0.457372	0.464633	0.279761	0.333222	0.237737	0.429339	0.28235	0.272937	0.21853	0.257958	0.295788	0.266945	0.242068	0.273714	0.290465	0.211397	0.208278	0.157563	0.139274	0.172908	0.318812	0.186231	0.150818	0.164826	0.226614	0.239432
1.74_259.153				259.153		1.74	22	0	12	10																0.106715	0.0857986		0.215646	0.116763	0.111495	0.222689	0.160897	0.239312	0.177192	0.142171	0.108749	0.120622			0.426684	0.427007	0.511531	0.43879	0.389024	0.348444	0.197535	0.383834	0.126272
1.66_259.153				259.153		1.66	22	0	12	10																0.0664903	0.0857795		0.142215	0.0839259	0.0740135	0.0893091	0.109687	0.0953432	0.104728	0.0640028	0.0671069	0.120622			0.513089	0.496773	0.570561	0.549687	0.396041	0.311415	0.202941	0.342076	0.0936148
4.63_259.215				259.215		4.63	30	15	15	0	0.279188	0.254304	0.328887	0.308828	0.342198	0.289757	0.557082	0.440585	0.246916	0.426231	0.68625	0.847944	0.373081	0.324684	0.331148	0.369753	0.131119	0.319617	0.48184	0.0941094	0.239501	0.102272	0.309203	0.780589	0.425316	0.458888	0.310234	0.128169	0.256861	0.229304
0.92_260.014				260.014		0.92	30	10	15	5		0.0368552		0.18981	0.132177	0.0723893	0.264054	0.110687		0.0805499	0.0857523	0.895079	0.108413			0.173264	0.212539	0.106212	0.429211	0.566128	0.467642	0.264766	0.380204	0.286239	0.305705	0.131575	0.219986	0.214973	0.210995	0.259609			0.0836328		0.264316	0.212117	0.122033	0.135604
0.56_260.066				260.066		0.56	30	15	15	0	0.622624	1.08595	0.888596	1.75268	1.38572	1.62205	1.45959	3.95604	1.21877	1.17135	1.2354	0.9352	0.782258	0.820172	1.0779	0.603244	0.812505	2.27904	0.901097	1.2289	0.922308	0.888067	1.01784	1.8163	0.796871	0.98516	0.901013	0.733616	0.785514	0.730323
3.15_260.126				260.126		3.15	30	15	15	0	0.37256	0.194544	0.177088	0.18475	0.409256	0.195674	0.424064	0.320427	0.114633	0.276429	0.118934	0.261023	0.463394	0.286306	0.398262	0.145602	0.271442	0.159323	0.528823	0.176683	0.19356	0.202214	0.156897	0.223136	0.159163	0.0698331	0.133439	0.480643	0.124573	0.112738
3.03_260.126				260.126		3.03	33	15	15	3	1.80196	0.872626	0.967621	2.13675	1.83685	0.811657	1.81438	1.54901	0.931455	1.29196	1.29877	1.17945	1.28225	0.909492	1.38753	0.874337	0.930346	0.816354	1.28049	0.694344	0.701332	0.935666	0.712243	0.993473	0.654057	0.369666	0.815347	0.480643	0.503036	0.524806	0.0600974	0.116931	0.0553805
1_261.052				261.052		1	40	15	15	10	0.297839	0.188093	0.799967	0.525012	0.226812	0.508778	0.284439	0.603751	0.412901	0.205359	0.204092	0.103477	0.163928	0.217184	0.28346	0.400776	0.41662	0.301077	0.875329	0.856197	0.488982	0.370172	0.302018	0.340119	0.481058	0.421473	0.288107	0.196228	0.241759	0.191537	0.660792	0.741159	0.506274	0.854391	0.370834	0.434937	0.116296	0.228672	0.173235
1.08_261.053				261.053		1.08	40	15	15	10	0.379886	0.273437	0.804421	0.334411	0.377064	0.660736	0.281368	0.497701	0.329903	0.360085	0.264672	0.1719	0.262879	0.328169	0.380563	0.662539	0.542574	0.396906	1.38435	1.02653	0.840058	0.681786	0.715948	0.771869	0.54601	0.568716	0.385727	0.199244	0.267437	0.177542	1.36795	1.3869	1.53815	2.54777	0.933582	1.14186	0.275731	0.55472	0.439263
1.24_261.95				261.95		1.24	29	15	14	0	0.376994	0.323491	0.771471	0.429864	0.237167	0.206865	0.431695	0.530822	0.134319	0.245628	1.02646	0.344814	0.295146	0.399364	0.103608	0.106286	0.668228	0.255329	0.997812	0.234713	0.31014	0.229192	0.301901	0.358796	0.328832	0.466071	0.434023	0.177565	0.0635994
1.22_261.976				261.976		1.22	33	15	15	3	1.17469	1.27025	1.49463	1.63137	1.60952	1.10055	2.0023	1.68757	1.00494	1.09644	1.76297	1.44945	1.10923	1.4101	0.915951	1.06502	1.34969	0.929704	1.89194	1.77687	1.08614	0.818158	0.748692	1.3145	0.980894	0.809425	0.863754	0.512927	0.419979	0.227945	0.0741291	0.062579	0.0456691
3.79_262.004				262.004		3.79	40	15	15	10	0.0892787	0.202571	0.0563223	0.399679	0.530406	0.357251	0.55652	0.358462	0.282292	0.335757	0.275533	0.473223	0.118434	0.608371	0.43594	0.321344	0.387229	0.514966	0.569818	0.159241	0.0438042	0.192756	0.45754	0.110073	0.328187	0.399979	0.306899	0.184088	0.0745337	0.0877826	0.186551	0.176513	0.110443	0.386762	0.219999	0.112169	0.23721	0.178944	0.287028
1.8_262.015				262.015		1.8	30	15	15	0	0.88316	0.832518	0.739643	1.15441	1.16667	0.973211	1.87509	1.63831	1.3854	1.67758	1.73154	1.08678	1.54598	1.31028	1.42258	0.579015	0.628364	0.553003	0.73813	0.806219	0.770173	0.790785	0.728814	0.959941	0.710553	0.676088	0.973541	0.717356	0.828876	1.17735
0.64_262.079				262.079		0.64	32	15	14	3	1.35857	0.990979	1.64021	1.02802	0.66676	0.549812	1.4952	1.04179	0.488933	0.14713	0.664159	0.153485	0.733164	0.462912	0.967866	0.259731	0.637307	0.59973	0.635356	0.776266	0.150424	0.085584	0.262602	0.202559		0.320946	0.164058	0.161967	0.115496	0.180656	0.155842	0.201511	0.259671
3.43_262.093				262.093		3.43	19	9	10	0							1.24171	0.974304	0.785409	0.670173	0.578975	0.904473	0.738583	1.34219	1.04223				0.336215			0.414661	0.347003	0.694755	0.708014	0.652955	0.815869	0.552291	0.643385	0.483055
3.33_262.098				262.098		3.33	30	15	15	0	0.330101	0.148419	0.0777393	0.380464	0.317609	0.205956	0.418632	0.19998	0.244253	0.253034	0.395285	0.354479	0.261706	0.309426	0.17428	0.282973	0.49996	0.0901029	0.150629	0.420635	0.317334	0.555964	0.463884	0.554292	0.496362	0.866258	0.644102	0.45091	0.651396	0.523277
3.66_262.141				262.141		3.66	40	15	15	10	0.110421	0.13545	0.294566	0.200881	0.144196	0.161477	0.18925	3.00577	0.122239	0.148509	0.159703	0.614897	0.171646	0.244116	0.239431	0.168594	0.16566	0.154898	0.283346	0.231669	0.160531	0.108342	0.148531	0.177986	0.157483	0.15704	0.254372	0.159775	0.167873	0.114926	0.0942385	0.0818758	0.0617784	0.150755	0.0944274	0.0837775	0.0854788	0.109402	0.114687
0.92_262.949				262.949		0.92	40	15	15	10	0.511563	0.44164	0.641067	0.52206	0.550232	0.417572	0.667744	0.541753	0.329979	0.316384	0.396066	0.364448	0.608262	0.565313	0.554346	0.568121	0.633274	0.510389	1.25353	1.08871	0.864279	0.532828	0.788279	0.74963	0.799424	0.531879	0.560187	0.666015	0.540018	0.484594	0.296731	0.338964	0.332893	0.469368	0.540337	0.450808	0.465356	0.395429	0.256325
1.49_264.006				264.006		1.49	30	15	15	0	0.383739	0.304181	0.294778	0.371866	0.647681	0.280426	0.61042	0.341517	0.345479	0.313127	0.281177	0.274445	0.29444	0.455474	0.280206	0.193026	0.416838	0.394823	0.486586	0.507483	0.453543	0.266739	0.227677	0.278637	0.350121	0.0762727	0.345315	0.186288	0.220458	0.199369
5.44_264.172				264.172		5.44	40	15	15	10	0.144324	0.216985	0.19322	0.272905	0.1562	0.199338	0.190696	0.337471	0.168659	0.147353	0.229013	0.464778	0.260824	0.272649	0.274986	0.189001	0.185189	0.136347	0.274982	0.177562	0.17655	0.128122	0.12328	0.190772	0.167367	0.157363	0.141006	0.158462	0.142954	0.113907	0.0724537	0.0785495	0.0909587	0.105107	0.0956458	0.0860243	0.0669628	0.0970164	0.0838326
4.19_264.885				264.885		4.19	40	15	15	10	0.883379	1.27008	1.76655	1.53311	1.14227	1.30584	0.91527	0.935295	0.497587	0.659125	1.04126	1.09249	1.64829	1.97542	1.69541	1.26098	1.1066	1.46077	2.06871	1.5405	1.25449	0.679018	1.06893	0.92422	1.12921	1.00376	1.27023	1.31626	1.09441	0.733656	0.629287	0.648862	0.705602	1.64236	0.936826	0.867162	0.96778	0.918532	1.18146
3.13_265.095				265.095		3.13	30	15	15	0	0.464733	0.183204	0.262308	0.449578	0.528341	0.339585	0.602964	0.28077	0.349936	0.397451	0.3268	0.329129	0.521594	0.299773	0.433032	0.245619	0.33258	0.198092	0.419042	0.109683	0.237124	0.164553	0.107556	0.268922	0.126815	0.1262	0.100371	0.0751763	0.0725687	0.0429968
1.43_266.1				266.1		1.43	40	15	15	10	0.614385	0.508802	0.486325	2.64706	0.594117	0.459829	1.18453	3.99417	0.92351	0.787909	1.08159	0.567204	0.596587	0.622235	0.938811	0.888858	0.491102	0.413004	3.55193	2.61072	1.91849	1.69556	1.95055	1.75141	0.834489	1.06168	0.679601	0.576974	0.995385	1.12658	0.0843514	0.183275	0.275902	0.733446	0.397427	0.44058	0.0616606	0.397747	0.0779607
1.29_266.1				266.1		1.29	38	15	15	8	0.595	0.820497	0.80905	0.976057	0.870091	0.811321	1.23497	1.14161	0.828059	0.847311	1.08955	0.888556	0.796294	0.685139	0.882535	0.448655	0.546441	0.584865	0.599063	0.711861	0.402993	0.706927	0.598106	0.588268	0.551382	0.465983	0.608882	0.383972	0.34625	0.411472	0.102441	0.233546	0.320086	0.167363	0.0495928	0.089357		0.106932
5.96_266.156				266.156		5.96	40	15	15	10	189.958	63.8848	683.276	113.663	69.5968	255.83	215.783	2275.45	99.3139	273.161	712.387	204.365	191.03	53.504	161.808	63.1878	54.1774	124.515	132.566	324.824	163.137	87.0504	66.5157	149.109	57.4882	39.7156	139.258	487.415	36.1943	94.8923	214.729	161.051	89.8049	185.236	8.84348	9.30969	11.9462	10.1076	15.4956
4.19_266.882				266.882		4.19	40	15	15	10	0.732146	1.17116	1.46846	1.20825	0.900803	1.11753	0.935856	0.836584	0.447283	0.663604	0.853494	0.822932	1.5202	1.84672	1.48938	1.04197	1.02335	1.20811	1.87035	1.29065	1.04289	0.636994	0.938355	0.860383	0.972632	0.874333	1.10234	1.10701	0.950184	0.646966	0.548565	0.56771	0.568161	1.22215	0.827034	0.714588	0.631845	0.739018	1.02627
1.66_267.005				267.005		1.66	30	15	15	0	0.64209	0.617413	0.605107	1.04711	0.946006	0.730298	0.953582	0.793744	0.565281	0.707155	0.929663	0.9848	1.12373	1.06133	1.06732	0.554851	0.737087	0.598874	0.968094	0.676569	0.576594	0.400035	0.518122	0.578762	0.551718	0.446587	0.527138	0.499043	0.408701	0.364197
5.55_267.109				267.109		5.55	40	15	15	10	0.135806	0.155883	0.221512	0.240245	0.187274	0.186369	0.243298	0.393659	0.133852	0.123873	0.259511	0.214159	0.269662	0.287844	0.308067	0.12787	0.170913	0.163947	0.308241	0.212365	0.161296	0.13234	0.161801	0.176639	0.182231	0.16333	0.12796	0.132555	0.130366	0.138311	0.0776557	0.10451	0.117817	0.209476	0.132858	0.0953145	0.121312	0.140787	0.145411
1.06_268.062				268.062		1.06	30	15	15	0	19.1163	8.69884	8.83367	17.9979	19.3763	12.6665	25.4014	16.9547	18.1131	20.1097	25.5917	19.3446	11.8877	10.8377	13.6176	8.95291	13.4324	8.8526	14.8581	10.1988	11.5119	11.5266	10.3513	13.6019	11.996	8.26041	11.162	7.65089	6.89915	12.8228
5.35_268.166				268.166		5.35	40	15	15	10	0.538921	0.277213	1.03827	0.537148	0.555004	0.334048	0.160507	2.66476	0.213747	0.250678	0.326454	1.1976	1.19363	0.190712	0.661153	0.271614	0.307558	0.443467	1.13711	0.0603467	0.437544	0.207081	0.342958	0.33801	0.0659888	0.473217	0.345	0.239498	0.445783	0.16481	0.792342	0.667664	0.162621	1.23924	0.1161	0.0439191	0.214937	0.291039	0.13853
0.77_270.078				270.078		0.77	30	15	15	0	5.69511	3.36847	3.35312	7.21941	8.54149	5.86698	10.6813	6.77794	7.32032	9.06	12.1554	9.64093	8.86778	6.33352	5.78879	3.18879	5.68279	3.31796	7.11424	4.55908	5.9741	5.45144	5.72101	5.61978	5.63862	4.7229	5.48441	4.27751	4.79569	4.3611
0.56_270.095				270.095		0.56	30	15	15	0	4.13917	11.028	6.50746	15.733	10.6137	13.2596	10.5808	13.75	8.01999	9.14253	9.71367	8.84387	14.7591	6.86295	11.9178	3.85983	4.79036	20.6311	6.39031	9.99441	5.17702	4.29204	7.17954	11.8131	4.0394	5.95057	5.94964	6.18752	6.37611	5.00911
5.17_270.139				270.139		5.17	40	15	15	10	0.232194	0.302542	0.364015	0.316948	0.289176	0.306286	0.295715	0.214314	0.178293	0.200414	0.292558	0.280743	0.395568	0.427432	0.358972	0.270485	0.213481	0.258449	0.418324	0.245184	0.227862	0.195939	0.22585	0.248422	0.184054	0.152005	0.234056	0.282985	0.169464	0.154694	0.140362	0.116741	0.104452	0.282581	0.156644	0.126004	0.155537	0.156552	0.219359
2.04_271.051				271.051		2.04	30	15	15	0	0.269517	0.149335	0.169647	0.308014	0.252058	0.128719	0.603232	0.291115	0.221737	0.348717	0.384002	0.273529	0.277268	0.325494	0.482366	0.0988007	0.153657	0.08659	0.315901	0.146116	0.118208	0.0921257	0.0585015	0.119932	0.111465	0.131469	0.120899	0.128732	0.136689	0.169778
2.26_271.052				271.052		2.26	30	15	15	0	1.83514	0.655373	0.663437	1.11028	1.45726	1.08971	2.05006	1.74029	1.40028	2.02441	1.81666	1.96592	1.75686	1.32742	2.2668	0.608919	1.04199	0.71054	1.85382	0.758728	0.752626	0.878734	0.553744	1.18427	0.986237	0.750207	0.893419	0.550859	0.869231	0.640218
3.75_272.015				272.015		3.75	40	15	15	10	0.935863	1.24994	1.44714	1.51986	1.34282	1.28632	1.19254	1.04898	0.710321	1.01921	1.76015	0.568388	1.69074	1.72663	1.60272	1.07938	1.25446	1.14311	1.94294	1.21979	1.05599	0.64655	0.936629	1.0148	1.04559	0.798955	0.982788	1.16945	1.00125	0.663219	0.618653	0.636012	0.632301	1.62994	0.782899	0.729822	0.868473	0.794864	1.0216
2.12_272.077				272.077		2.12	39	15	15	9	0.13222	0.138671	0.335292	0.153223	0.163014	0.262327	0.268405	0.49766	0.345713	0.53062	0.405641	0.128831	0.161657	0.176487	0.232927	0.245946	0.20666	0.160124	0.695201	0.662412	0.36164	0.889357	0.618164	1.18207	1.06603	1.03229	0.78798	0.730932	0.652317	0.638174	0.339922	0.354627	0.361108	0.497918	0.375029	0.38536	0.158745	0.287683
4.21_272.156				272.156		4.21	40	15	15	10	0.642852	0.714687	0.703709	1.02178	0.92481	0.863518	0.665236	0.655973	0.335688	0.349377	0.541955	0.766491	1.15679	0.896906	1.11138	0.573377	0.852047	0.542878	1.03492	0.787957	0.621614	0.512543	0.560705	0.686326	0.633731	0.587321	0.56726	0.644907	0.62218	0.426259	0.263462	0.267297	0.268681	0.534483	0.331816	0.318148	0.328125	0.302321	0.369167
5.64_272.198				272.198		5.64	40	15	15	10	0.142318	0.17996	0.241353	0.16737	0.156887	0.154315	0.132197	0.848898	0.143236	0.117206	0.308206	0.307117	0.279742	0.310148	0.202054	0.145048	0.188044	0.146757	0.217334	0.158715	0.136534	0.108279	0.117691	0.153428	0.134142	0.159167	0.144669	0.10964	0.0999984	0.103635	0.0962832	0.0817163	0.0740439	0.16319	0.108113	0.0871182	0.0931027	0.126834	0.120488
6.01_272.235				272.235		6.01	40	15	15	10	0.292061	0.241808	0.403828	0.44352	0.290797	0.317404	0.332169	0.542177	0.257718	0.214053	0.33345	0.43576	0.413791	0.494761	0.438078	0.278528	0.385453	0.204449	0.535263	0.284836	0.291363	0.242707	0.364483	0.614821	0.27249	0.23919	0.309401	0.224447	0.20147	0.168704	0.126988	0.116224	0.0899045	0.201968	0.24995	0.187131	0.145366	0.16733	0.158827
1.8_273.029				273.029		1.8	35	10	15	10	0.0532922		0.0928036				0.142419	0.116063	0.0605762	0.100623	0.17998	0.0792989		0.115914	0.114049	0.0794509	0.0756771	0.0660016	0.178761	0.128856	0.119849	0.0984884	0.123642	0.13728	0.0689782	0.0903014	0.0747495	0.0761843	0.0699788	0.0960293	0.318354	0.309322	0.298823	0.286563	0.215591	0.206726	0.0747327	0.160042	0.0649725
1.75_273.085				273.085		1.75	33	15	15	3	0.96703	0.460759	0.405341	1.0912	1.54083	0.832872	1.71041	1.30926	1.21295	1.67338	2.20771	1.80729	1.55489	1.24996	1.08777	0.707702	0.788128	0.625017	1.23782	0.644861	0.780331	0.477034	0.511416	0.93268	0.577436	0.650188	0.632343	0.46191	0.534173	0.357416	0.0427976	0.0356493	0.0376129
3.8_274.038				274.038		3.8	40	15	15	10	0.446589	0.485463	0.598326	0.632235	0.571967	0.189711	0.235812	0.367863	0.117185	0.353262	0.185277	0.66115	0.721706	0.78352	0.717147	0.297998	0.30783	0.537027	0.768158	0.302733	0.467337	0.237904	0.421825	0.41143	0.175082	0.157337	0.278066	0.398982	0.210768	0.135555	0.181481	0.221835	0.133706	0.296299	0.346504	0.268053	0.364163	0.305867	0.389022
3.73_274.038				274.038		3.73	40	15	15	10	0.130745	0.147902	0.204427	0.256301	0.102735	0.180444	0.16428	0.143911	0.0903694	0.101682	0.0608668	0.128758	0.288845	0.276939	0.241313	0.136211	0.154427	0.156039	0.30467	0.0759197	0.148526	0.0834893	0.150704	0.0925486	0.0656746	0.123613	0.123489	0.0661624	0.128529	0.0912337	0.0740993	0.0582757	0.0585211	0.143363	0.104631	0.0882287	0.119276	0.0875136	0.151611
4.32_274.177				274.177		4.32	30	15	15	0	0.365048	0.156414	0.692604	0.229027	0.288123	0.20202	0.578313	0.148743	0.148676	0.349648	0.315837	0.405299	0.322976	0.4308	0.49376	0.256058	0.248226	0.168162	0.499762	0.235661	0.357065	0.217204	0.243607	0.285606	0.18134	0.258038	0.13794	0.103578	0.200398	0.116312
4.11_274.214				274.214		4.11	25	15	10	0	0.315986	0.222292	0.171957	0.41825	0.30119	0.251523	0.576125	0.652756	0.494766	0.74295	0.566588	0.393605	0.350761	0.322416	0.249994	0.11206	0.113591	0.182576	0.162372	0.199987	0.138983	0.116964		0.204094		0.127173	0.173746
0.73_275.98				275.98		0.73	38	15	15	8	0.646856	0.701962	1.02399	0.92073	0.949193	0.730361	0.922858	0.472704	0.435592	0.34159	0.622054	0.661495	1.18691	1.19234	1.37256	0.620869	0.797405	0.744847	0.720673	0.715798	0.402008	0.150581	0.305834	0.189462	0.308958	0.296002	0.381797	0.386008	0.50741	0.176024	0.120876	0.147278	0.0864469	0.149673	0.0547887	0.0812107		0.0559765
2.62_276.055				276.055		2.62	23	0	14	9																0.150981		0.0865047	0.431299	0.238131	0.218275	0.497533	0.450767	0.651222	0.438395	0.366272	0.336968	0.372897	0.288966	0.320317	0.192069	0.193052	0.189589	0.14325	0.614052	0.766788	0.569044	0.503935
1.31_276.084				276.084		1.31	30	15	15	0	1.11588	0.624324	0.446716	1.92978	1.94809	1.72347	1.98128	1.69266	1.11676	2.03799	2.73072	0.573232	0.5211	0.577533	0.429813	0.606626	0.394333	0.560832	0.618226	0.692661	0.449793	0.471354	0.329443	0.63881	0.282358	0.372534	0.25255	0.188114	0.191404	0.242821
0.89_276.094				276.094		0.89	31	14	14	3	0.328163	0.157203		0.289377	0.175123	0.307177	0.575967	1.01438	0.691673	0.934956	0.69582	0.60923	0.32553	0.749801	0.171853	0.21203	0.189505		0.427715	0.690781	0.259371	0.50154	0.438477	0.497885	0.656296	0.897167	0.782928	0.176677	0.401974	0.121209	0.113196	0.0763288	0.0451802
0.54_276.094				276.094		0.54	34	12	13	9	0.302167	0.407473	0.0579285			0.931513	0.194835	0.356534	0.199922	0.103064		0.137903	0.220705	0.193387	0.255972	0.197206	0.235665	0.291077	0.438108	0.561321	0.322373	0.26007	0.321007	0.385395		0.211599	0.277176		0.0756688	0.155397	0.719522	0.73274	1.84054	2.34168	0.896387	1.06421	0.188269	0.564243
2.25_276.121				276.121		2.25	14	0	14	0																0.294777	0.0948318	0.0852048	0.348099		0.181927	0.396158	0.367602	0.312998	0.479185	0.262706	0.341631	0.445846	0.213373	0.222621
5.76_276.172				276.172		5.76	40	15	15	10	0.223152	0.245121	0.327798	0.364271	0.276418	0.272043	0.331396	0.57769	0.17166	0.220653	0.331883	0.390171	0.33532	0.321615	0.369778	0.214554	0.289634	0.179216	0.343074	0.316988	0.191529	0.124342	0.20117	0.395471	0.262107	0.233041	0.220556	0.205049	0.202946	0.140776	0.213366	0.184362	0.179647	0.302838	0.189609	0.175925	0.14777	0.213644	0.172964
5.83_276.208				276.208		5.83	30	15	15	0	0.403113	0.275119	0.376939	0.267823	0.296223	0.278747	0.437621	0.367664	0.222604	0.371203	0.353763	0.292633	0.241923	0.337016	0.339467	0.271088	0.327372	0.172807	0.43295	0.451161	0.24184	0.168153	0.123931	0.337183	0.148561	0.151959	0.136443	0.0844811	0.158565	0.109009
1.01_277.024				277.024		1.01	40	15	15	10	0.250539	0.187807	0.74078	0.22315	0.216942	0.467862	0.313205	0.491097	0.343861	0.268643	0.25612	0.148417	0.132738	0.273783	0.308467	0.465805	0.509909	0.385656	0.841307	1.00838	0.379855	0.310517	0.300889	0.46905	0.594292	0.370502	0.286477	0.188862	0.237333	0.152315	0.709212	0.715824	0.458671	0.997236	0.370912	0.520604	0.115148	0.272387	0.180532
1.09_277.025				277.025		1.09	40	15	15	10	0.351491	0.304272	0.800196	0.402475	0.378899	0.549695	0.371688	0.55631	0.337045	0.534964	0.330292	0.237831	0.230221	0.371184	0.30376	0.783149	0.625376	0.426618	1.37658	1.32928	0.738632	0.593466	0.647865	1.13014	0.604351	0.570967	0.400694	0.171554	0.241723	0.165898	1.45411	1.45447	1.2469	2.96917	0.978807	1.27295	0.340289	0.665926	0.442014
6.07_277.204				277.204		6.07	40	15	15	10	0.223863	0.265285	0.29418	0.448396	0.261881	0.259424	0.428082	0.209919	0.151603	0.238123	0.278116	0.287649	0.331971	0.35889	0.363127	0.235613	0.245184	0.240866	0.447324	0.330958	0.240609	0.151339	0.235329	0.25624	0.30787	0.183823	0.227121	0.217058	0.193355	0.158418	0.119691	0.0736098	0.115066	0.366256	0.18843	0.194771	0.179798	0.174444	0.183746
1.91_278.022				278.022		1.91	29	15	14	0	0.32364	0.186029	0.266754	0.217171	0.428874	0.134416	0.366794	0.266718	0.318794	0.173661	0.168828	0.140432	0.149523	0.292002	0.172212	0.0969758	0.239833	0.213692	0.183488	0.288782	0.205789	0.217068	0.144356	0.21564	0.144705		0.156398	0.0973213	0.0986086	0.12128
3.75_278.032				278.032		3.75	40	15	15	10	0.809036	1.22314	1.46977	1.55053	1.15602	1.35317	0.876973	0.683739	0.440436	0.683136	0.921992	1.63328	1.94357	1.88735	1.64427	1.23999	1.15713	1.2027	2.10914	1.20859	1.08181	0.574114	0.680598	0.886148	1.06477	0.842844	0.861299	1.25152	0.894453	0.444812	0.677139	0.819705	0.652446	1.64434	0.994893	0.812327	0.835664	0.778762	1.22471
5.88_278.151				278.151		5.88	40	15	15	10	0.588814	0.779943	1.04473	1.10996	0.872618	0.720127	0.976412	1.8391	0.397176	0.718942	0.63975	1.0848	0.845643	1.18554	1.04885	0.788397	0.70466	0.557181	1.15671	0.960953	0.548455	0.443281	0.640424	1.01005	0.816163	0.512942	0.717799	0.626701	0.624958	0.402673	0.587493	0.570253	0.392551	0.726398	0.552887	0.422407	0.44811	0.492863	0.503742
6.22_278.153				278.153		6.22	40	15	15	10	0.412688	0.565947	0.243314	0.219404	0.217762	0.164325	0.322676	0.341549	0.503562	0.199084	0.301802	0.29867	0.189225	0.421171	0.502647	0.206281	0.186862	0.129454	0.298986	1.20903	0.404809	0.117172	0.614851	0.101801	0.15877	0.16478	0.0687953	0.0978889	0.387387	0.410498	0.124697	0.0493039	0.129753	0.244774	0.141786	0.0873909	0.132972	0.188551	0.108374
5.75_278.188				278.188		5.75	40	15	15	10	0.172482	0.183761	0.246659	0.281191	0.174002	0.251468	0.182846	0.639489	0.169995	0.172201	0.296701	0.326537	0.329942	0.300502	0.31629	0.199014	0.19109	0.182729	0.298789	0.222493	0.159977	0.113843	0.211063	0.542919	0.214213	0.239367	0.256092	0.186592	0.156315	0.166379	0.202948	0.155979	0.176419	0.130072	0.235529	0.141466	0.181636	0.244249	0.111296
6.1_278.223				278.223		6.1	37	15	15	7	0.920005	0.408798	0.515555	0.63995	0.495961	0.578229	0.725162	0.445226	0.368373	0.801799	0.854129	0.475455	0.632308	1.25327	1.11561	0.701106	0.672924	0.417172	1.09684	1.35452	0.65578	0.525681	0.457829	1.11083	0.481764	0.639672	0.380186	0.403761	0.530206	0.337362	0.0661488	0.0482813	0.100057		0.868224	0.773476	0.415861	0.62899
6.03_278.223				278.223		6.03	37	15	15	7	0.306415	0.128361	0.169795	0.184748	0.213088	0.132189	0.343603	0.450595	0.186243	0.274217	0.282151	0.143618	0.154444	0.321929	0.355234	0.219725	0.243319	0.17338	0.366749	0.298786	0.206982	0.168233	0.148795	0.265018	0.143471	0.172283	0.113262	0.0890558	0.156937	0.129701	0.147015	0.120208	0.107241		0.460662	0.490104	0.0878315	0.214898
1.11_280.046				280.046		1.11	27	7	12	8	0.156801		0.277582		0.105217		0.374659	0.687545	0.154332	0.242291						0.144654	0.152067		0.27457	0.240186	0.218262	0.269742	0.150648	0.264627	0.15304	0.147589	0.0987704		0.129008		0.65578	0.68989	0.88039	0.396535	0.440771	0.499081		0.292585
1.66_280.116		C11H20O8	280.116	280.116	-0.2	1.66	30	15	15	0	0.851812	0.667109	0.535666	1.12859	0.904635	0.774956	1.38645	1.00062	0.843664	1.17701	1.22165	1.16026	1.20961	1.0458	1.09036	0.620098	0.584147	0.517766	0.864383	0.738036	0.633769	0.495566	0.559124	0.740869	0.599971	0.585339	0.601858	0.621504	0.640926	0.718453
1.6_280.116		C11H20O8	280.116	280.116	-0.2	1.6	30	15	15	0	0.665661	0.62618	0.540952	0.937463	0.85316	0.670575	1.65397	1.12657	1.10628	1.61575	1.73531	1.70483	1.55622	1.40445	1.03641	0.399583	0.42172	0.349047	0.607495	0.505083	0.466571	0.369382	0.374729	0.435938	0.372712	0.335834	0.376696	0.28958	0.297143	0.208365
1.29_280.116		C11H20O8	280.116	280.116	-0.2	1.29	34	15	15	4	0.864144	0.722061	0.653686	1.0477	1.08664	0.728937	1.22991	0.835288	0.878431	0.997344	1.32244	1.12149	1.03119	1.0431	1.11131	0.521523	0.570718	0.571412	0.57636	0.770385	0.668951	0.396962	0.554027	0.650745	0.386443	0.412386	0.467855	0.443533	0.421465	0.401161	0.0447458	0.0491521	0.073221			0.0685613
6.24_280.169				280.169		6.24	40	15	15	10	0.0984347	0.539487	0.36367	0.604831	0.584934	0.56558	0.748768	2.36986	0.424749	0.132504	0.182003	0.497453	1.46084	0.30093	0.846568	0.122665	0.552194	0.47045	0.319575	0.228416	0.0953246	0.395316	0.46197	0.0402674	0.428125	0.117815	0.209313	0.606406	0.466572	0.328233	0.121389	0.0754854	0.110384	0.225852	0.0797914	0.264259	0.0413127	0.142061	0.208364
6.32_280.17				280.17		6.32	40	15	15	10	0.600585	0.498732	1.79801	0.588486	0.933312	0.674317	0.85008	10.2573	0.424749	0.789403	1.17862	2.24172	1.4647	1.83701	0.839259	0.682005	0.580081	0.453959	1.28311	0.896626	0.581642	0.345826	0.778474	0.607246	0.428125	0.708257	0.356235	0.595347	0.466572	0.327474	0.557781	0.317707	0.605085	0.950909	0.413973	0.264527	0.382139	0.72889	1.13519
6.08_280.24				280.24		6.08	40	15	15	10	1.16725	0.451424	0.759064	0.809332	0.705746	0.556601	0.933389	0.715401	0.497033	1.05185	1.03558	0.903459	0.693516	0.96151	1.32268	1.51207	1.45249	1.06374	4.45066	3.13168	2.13837	0.771286	1.39514	1.43478	1.48172	1.30567	1.13855	1.00983	0.954593	0.864257	5.85372	10.2749	6.16073	9.04333	1.14081	1.16639	1.12782	1.43743	1.11916
6.16_280.241				280.241		6.16	40	15	15	10	0.675328	0.195086	0.324376	0.402141	0.320461	0.30111	0.31111	0.276594	0.196741	0.423919	0.46639	0.450564	0.475464	0.762021	0.978599	1.01911	0.915115	0.441235	2.58968	3.21401	1.39441	0.398636	0.712248	0.345125	0.699275	0.642909	0.447925	0.332099	0.456402	0.286523	6.99958	1.69898	0.935565	10.8287	0.640935	0.783724	0.634734	0.670868	1.3292
1.59_281.049				281.049		1.59	30	5	15	10	0.05343					0.111696		0.114015	0.065615	0.137616						0.190245	0.0909754	0.068403	0.485721	0.324144	0.235008	0.230755	0.27336	0.330631	0.443363	0.302644	0.243943	0.191809	0.1249	0.0996238	0.568703	0.566476	0.600874	1.55214	0.933799	0.755219	0.637669	0.729973	0.375279
4.44_281.991				281.991		4.44	40	15	15	10	0.187503	0.264957	0.341718	0.428546	0.259151	0.295091	0.386429	0.313782	0.183072	0.272903	0.382689	0.325937	0.361371	0.417927	0.36614	0.231365	0.202008	0.263791	0.452364	0.243404	0.217846	0.158805	0.218401	0.269871	0.284009	0.184146	0.226523	0.181751	0.168486	0.172085	0.161255	0.134086	0.170075	0.338086	0.173386	0.166884	0.180622	0.170124	0.178122
1.25_282				282		1.25	33	15	15	3	0.952815	0.63091	0.624054	0.886927	0.907308	0.702581	0.791594	0.927466	0.598717	0.719953	0.869077	1.12293	1.31062	1.4868	1.15355	0.556913	0.494195	0.540535	0.879846	0.859581	0.321646	0.612741	0.427023	0.642356	0.925971	0.307796	0.575001	0.602031	0.515514	0.261986	0.0470068	0.0622833	0.0395369
1.21_282				282		1.21	36	15	15	6	0.200909	0.352388	0.400457	0.443054	0.358861	0.378428	0.434526	0.291765	0.206317	0.270327	0.270275	0.318586	1.17385	1.4475	1.27176	0.228228	0.319085	0.32364	0.50393	0.252489	0.230595	0.111848	0.25766	0.214653	0.258042	0.26089	0.26987	0.603719	0.48063	0.242653	0.0384064	0.0599976	0.0528571	0.100474		0.0561541
3.68_282.017				282.017		3.68	40	15	15	10	0.305055	0.596605	0.81416	0.565384	0.473549	0.516055	0.226527	0.219369	0.0946978	0.0849465	0.216834	0.345354	0.534411	0.703068	0.570819	0.513899	0.561509	0.597142	0.80404	0.636702	0.417148	0.153664	0.315673	0.173656	0.386021	0.318913	0.45048	0.420654	0.292911	0.193671	0.547803	0.331327	0.324469	0.885206	0.442912	0.36798	0.440775	0.423231	0.825921
2.83_282.074				282.074		2.83	30	15	15	0	7.20052	3.86146	6.09278	4.21185	4.78223	4.16944	6.28783	4.06405	2.92846	1.9198	3.33302	1.5539	2.20485	5.44328	3.28284	3.47927	3.55872	4.71942	3.71501	2.23888	1.88542	2.10086	1.51845	2.11969	1.15556	1.45816	1.17066	0.726899	0.985421	1.22944
3.31_282.075				282.075		3.31	30	15	15	0	0.473681	0.498224	0.530188	0.674553	0.465042	0.748207	1.14665	1.08015	0.754568	0.732429	1.383	0.524227	0.282875	0.338826	0.405623	0.22487	0.17125	0.194336	0.312471	0.456805	0.314119	0.359207	0.443701	0.2191	0.294692	0.317606	0.339527	0.313658	0.0987531	0.372591
3.14_282.075				282.075		3.14	30	15	15	0	0.186125	0.12637	0.245194	0.272048	0.214941	0.758211	0.381805	0.374075	0.20535	0.746461	0.247921	0.221885	0.178726	0.482113	0.227902	0.116118	0.1518	0.112701	0.137828	0.236556	0.119073	0.156925	0.127381	0.199406	0.0975596	0.13068	0.181974	0.0933152	0.137109	0.157133
1.22_282.095				282.095		1.22	30	15	15	0	1.10627	0.813339	0.757871	1.20144	0.910656	0.918565	1.14182	0.876192	0.794271	1.07334	1.02042	1.04312	0.710548	0.789328	0.592737	0.619766	0.54876	0.602823	0.662509	0.519375	0.60014	0.735962	0.587068	0.625018	0.64804	0.591542	0.709651	0.460835	0.462788	0.559162
2.37_282.131		C11H22O8	282.131	282.131	0.47	2.37	30	15	15	0	3.78855	2.16945	1.23613	5.39353	4.98051	3.32554	9.05566	4.25799	6.7047	11.1791	9.45004	5.91469	3.99792	5.24409	8.00643	0.943876	1.51533	0.74942	1.376	0.748025	1.06692	0.331316	0.36645	0.494048	0.148307	0.196363	0.304364	0.323901	0.324545	0.21636
4.85_282.148				282.148		4.85	24	12	9	3	0.0935614		0.510825	0.0984995		0.196183	0.173333	10.7672	0.0563991	0.205296	0.540963	0.14017	0.15597		0.148888			0.0813978	0.0988657	0.277584	0.126647	0.0778161		0.111397			0.159985	0.154885		0.046792	0.158104	0.0883541		0.110482
4.71_282.15				282.15		4.71	14	11	0	3	0.0970849	0.0859495	0.588486	0.0931712			0.201223	10.7512	0.078386		0.644442	0.131108	0.198452		0.0926708																0.167918	0.0804668		0.0730039
4.49_282.15				282.15		4.49	33	14	15	4	0.746458	0.535411	1.67822	0.305035	0.322375	0.326471	0.739271	16.8479	0.769716	0.162181	0.925653	0.903184	0.275898		0.297636	0.348005	0.243637	0.381294	0.637532	0.954147	0.758589	0.559073	0.531026	0.760867	0.50888	0.352623	0.366434	1.81347	0.177825	0.72737	0.415363	0.518685	0.110631	0.39567
4.46_282.15				282.15		4.46	33	14	15	4	0.0926282	0.340307	1.59037	0.448185	0.243755	0.599261	0.528494	16.8583	0.412833	0.750938	1.82848	0.561022	0.218539		0.29632	0.323007	0.198514	0.344406	0.545783	0.556147	0.647185	0.40582	0.444717	0.472896	0.449244	0.196787	0.593607	1.53158	0.170665	0.508563	0.423891	0.444071	0.20368	0.399892
3.76_282.985				282.985		3.76	40	15	15	10	0.23444	0.288316	0.362193	0.377354	0.348374	0.307486	0.33241	0.284683	0.172793	0.248685	0.340139	0.470031	0.392197	0.459286	0.407718	0.243225	0.309126	0.256057	0.452508	0.317773	0.263089	0.17304	0.233782	0.280574	0.293568	0.206552	0.22951	0.267593	0.288867	0.195908	0.161879	0.179849	0.176753	0.332944	0.185889	0.165447	0.173882	0.173256	0.206702
1.43_283.092				283.092		1.43	40	15	15	10	0.381906	0.244624	0.44163	0.465048	0.398671	0.326863	0.555051	2.90878	0.300474	0.384545	0.291811	0.201136	0.235591	0.356111	0.316143	0.488344	0.427698	0.321001	0.830515	0.580627	0.5677	0.350459	0.439272	0.427474	0.359791	0.379693	0.268245	0.255598	0.355473	0.249374	0.495168	0.423964	0.346281	0.285828	0.221852	0.184469	0.114282	0.15437	0.130144
0.92_283.978				283.978		0.92	40	15	15	10	0.332201	0.296388	0.468082	0.382339	0.392268	0.27188	0.573557	0.344063	0.250362	0.366859	0.372343	0.262079	0.546203	0.398667	0.38891	0.443226	0.48072	0.300987	0.976796	0.740223	0.608117	0.345215	0.523928	0.461356	0.525527	0.358835	0.460985	0.491761	0.475365	0.375217	0.1502	0.188572	0.140573	0.351236	0.335647	0.267197	0.258708	0.254671	0.0943868
4.06_284.057				284.057		4.06	24	0	15	9																0.264203	0.131367	0.137401	0.923966	0.47151	0.480368	0.640399	0.45543	0.766142	0.369901	0.394012	0.232959	0.15729	0.148842	0.136526	0.249206	0.278197	0.390739	0.29536	0.350357	0.534576	0.088158	0.131946
3.71_284.089				284.089		3.71	28	11	13	4	0.0896827	0.270545	0.215951	0.0967107	0.268078	0.268528	0.2432	0.242731	0.314781					1.31897	0.180509	0.0927052	0.0863908			0.362046	0.141171	0.101999	0.766398	0.236249	0.0724519	0.162834	0.242022	0.0870553	0.258155	0.246734	0.0888655	0.0913013	0.0946667
1.08_284.111				284.111		1.08	30	15	15	0	1.19001	1.07954	1.26829	1.55843	1.52137	1.46959	2.50053	2.18234	2.1724	2.95614	2.42346	1.81443	1.67881	2.14421	2.04188	0.828756	0.762804	0.924014	0.75743	1.98687	0.98093	0.825772	1.34987	1.28093	0.67021	1.00499	1.07301	0.729786	1.08756	1.16424
5.22_284.117				284.117		5.22	40	15	15	10	0.0847335	0.146603	0.18591	0.143093	0.185425	0.191155	0.307232	0.272536	0.123847	0.212961	0.276238	0.353128	0.190746	0.265643	0.193859	0.135652	0.113276	0.136408	0.294002	0.129508	0.0955898	0.0763564	0.0801711	0.279644	0.101036	0.121241	0.131207	0.126422	0.10489	0.0603973	0.141272	0.117737	0.124406	0.224249	0.12356	0.0834976	0.0360499	0.0748563	0.0975821
3.23_286.141				286.141		3.23	30	15	15	0	0.408881	0.164995	0.382397	0.760558	0.439523	0.433534	0.549266	0.830359	0.368745	1.1216	1.04041	0.600797	0.730064	0.65527	0.553904	0.408064	0.215427	0.276351	0.55675	0.288825	0.345174	0.285538	0.332626	0.50136	0.388268	0.208849	0.654227	0.203005	0.227204	0.0926409
1.08_286.147				286.147		1.08	16	0	8	8																0.0677251			0.200416	0.218905	0.137	0.132975	0.069209	0.213462	0.0615706						1.50259	1.83259	1.41934	2.30404	0.428179	0.798377		0.209049
1.01_286.15				286.15		1.01	20	3	9	8								0.0660177	0.0572589	0.0837274						0.0944278			0.105043	0.242113	0.119789	0.0578728	0.104315	0.273735	0.0807095	0.0637098					0.415594	0.454392	0.247908	0.352405	0.0730318	0.264095		0.288161
5.89_286.214				286.214		5.89	40	15	15	10	0.842855	0.32537	0.655754	0.552318	0.393393	0.279332	0.580615	0.404578	0.369989	0.391774	0.605268	0.615476	0.717987	1.0803	0.874425	0.564065	0.72223	0.309785	0.584076	0.493857	0.404141	0.197072	0.234813	0.781343	0.294078	0.301641	0.366628	0.298727	0.272769	0.226022	0.192401	0.137064	0.142459	0.180266	0.0857083	0.108608	0.0688198	0.127219	0.101904
3.75_286.979				286.979		3.75	40	15	15	10	0.98247	1.49012	1.76124	1.63484	1.42884	1.3869	1.26181	1.15642	0.646403	0.80928	1.36739	1.87995	1.87223	1.97681	1.89337	1.2752	1.41538	1.31797	1.96007	1.44314	1.12951	0.681385	1.0945	1.15757	1.17509	1.00361	1.11053	1.25068	1.0259	0.71314	0.903488	0.86633	0.82221	1.84637	1.01422	0.933736	1.05141	0.974198	1.33513
1.98_287.103				287.103		1.98	35	15	15	5	0.388249	0.161258	0.202976	0.436768	0.43973	0.265888	0.656404	0.467896	0.438046	0.500671	0.522925	0.430619	0.511294	0.473725	0.577346	0.211466	0.176835	0.24378	0.338131	0.224372	0.176996	0.247392	0.153844	0.31352	0.189813	0.163391	0.186959	0.172953	0.10923	0.101571	0.175399		0.177944	0.170412			0.132704	0.141059
5.21_287.246				287.246		5.21	33	15	15	3	1.74095	1.78703	1.89133	1.37415	1.93912	1.60727	3.85432	3.36196	1.68171	3.11328	5.58879	4.3141	2.69821	2.93586	3.35784	1.97704	0.899846	1.65817	4.33419	0.574725	1.37481	0.417059	1.29721	5.47572	2.77267	3.54746	2.00788	0.565127	1.06786	1.36584					0.055304	0.0753516		0.067831
2.12_288.048				288.048		2.12	38	14	15	9	0.151494	0.111024	0.364899	0.147665	0.152123	0.216316	0.287203	0.420489	0.316053	0.465321	0.371636	0.112655	0.160119		0.205797	0.246162	0.185301	0.166028	0.615381	0.529751	0.301184	0.676478	0.495546	0.858026	0.81899	0.783982	0.586449	0.529816	0.554318	0.446475	0.299479	0.276812	0.333052	0.409124	0.316679	0.323508	0.117116	0.216887
3.43_288.063				288.063		3.43	33	15	15	3	1.17449	0.725534	1.06912	0.808886	0.688374	1.67175	2.67045	1.51848	1.26676	2.77316	1.89218	0.742251	1.04914	1.53868	2.06816	0.794698	0.643419	0.447611	0.60912	1.08166	0.4375	0.843236	0.340052	0.754228	0.471695	0.597679	0.857857	0.224981	0.538841	0.454161	0.0757093	0.0552375			0.0719226
2.61_288.064				288.064		2.61	30	15	15	0	1.20384	1.13973	1.99057	1.45243	1.10434	1.48901	1.99996	1.5633	1.3204	1.34583	1.45282	0.880547	1.30509	1.48677	1.44661	0.74557	0.713147	0.800696	0.528119	1.04461	0.676956	0.790701	0.588945	0.987236	0.564596	0.729684	1.03876	0.504906	1.02917	1.02358
1.65_288.085				288.085		1.65	34	15	15	4	6.81004	4.60532	4.47433	6.77069	8.35786	5.2881	10.9884	6.87092	4.85144	6.30341	9.14922	5.60153	7.43625	7.85427	10.2288	3.23981	4.79214	4.05676	4.06018	4.14311	3.88106	2.24219	2.02015	3.73749	1.79608	1.57053	1.97783	1.30372	1.13374	1.7811	0.0371907	0.0394442	0.0658631					0.078153
1.32_288.085				288.085		1.32	34	15	15	4	0.534925	0.410752	0.35432	0.655888	0.809833	0.47141	0.875357	0.813872	0.540964	0.771677	0.816994	0.646574	0.70673	0.462971	0.47777	0.417901	0.445218	0.443516	0.606853	0.576589	0.500355	0.767736	0.791512	0.687099	0.464149	1.37781	0.693548	0.651516	0.996032	1.77991	0.190398	0.26364	0.139035			0.036641
2.73_288.132				288.132		2.73	20	0	10	10																			0.235555	0.12609	0.0733623	0.189463	0.119928	0.146127	0.126212	0.0835496	0.0840394	0.137831			0.454621	0.463358	0.428157	0.410893	0.258236	0.180482	0.11815	0.189618	0.122957
3_288.157				288.157		3	30	15	15	0	0.651851	0.319045	0.966805	1.01803	0.70665	0.588723	0.884968	1.16901	0.643281	1.22737	1.04907	0.881781	1.37159	0.74401	0.992734	0.579643	0.386931	0.492321	0.837373	0.206305	0.486416	0.26119	0.327528	0.757103	0.271905	0.143002	0.641346	0.209135	0.190239	0.177246
6.01_288.23				288.23		6.01	33	15	12	6	3.40783	1.18401	1.08497	3.21808	1.66468	2.07262	4.17084	1.17336	1.99716	1.95475	1.85917	1.76689	1.66891	1.44736	1.59117	0.862433	0.707786	0.767635	1.31248	0.467433	0.708212	0.743204	0.432395	1.39654		0.253676	0.133079		0.152516		0.0553921	0.0719628	0.0839862	0.143431	0.0735567			0.0472205
1.81_289.075				289.075		1.81	40	15	15	10	0.285445	0.145378	0.304701	0.319816	0.328035	0.146146	0.560657	0.440864	0.28286	0.420497	0.563637	0.311522	0.336939	0.337352	0.350837	0.253979	0.246685	0.175499	0.518684	0.402709	0.355168	0.357968	0.364489	0.549918	0.28356	0.222364	0.322331	0.243498	0.269206	0.343676	0.900543	0.827533	0.770449	0.784353	0.483319	0.562696	0.107714	0.300697	0.0830759
3.88_289.113				289.113		3.88	24	0	14	10																0.0924585	0.081714		0.141791	0.0909645	0.108023	0.121629	0.132877	0.169326	0.290285	0.23799	0.166041	0.311593	0.217903	0.115848	0.133031	0.0992206	0.166893	0.145755	0.824259	0.482489	0.656546	0.936512	0.222063
0.84_289.127				289.127		0.84	25	0	15	10																0.688068	0.750318	0.566749	0.864219	0.585388	0.58802	0.604533	0.695301	0.720233	0.38257	0.491501	0.346241	0.231925	0.156967	0.0913661	2.1002	2.02344	2.37093	2.31801	1.73725	2.02086	0.537197	1.45301	0.449397
1.12_290.074				290.074		1.12	33	11	14	8	0.206965	0.136238	0.392808		0.206627		0.475791	0.566986	0.202521	0.252803	0.177026	0.162673			0.278138	0.20083	0.208892	0.15776	0.47722	0.363069	0.261202	0.2341	0.185397	0.289484	0.200916	0.167955	0.113678		0.181431	0.0796829	0.449801	0.557461	0.520095	0.472662	0.329787	0.280147		0.133275
1.73_290.1				290.1		1.73	30	15	15	0	0.478543	0.206529	0.25646	0.480493	0.701591	0.334402	0.879088	2.47	0.601162	0.589565	0.931743	0.636138	0.615999	0.459948	0.651825	1.24973	1.71107	1.566	0.364175	2.18527	0.255758	0.875018	0.956375	1.67112	0.213125	1.04761	1.08009	0.823916	0.819296	1.02794
1.65_290.1				290.1		1.65	30	15	15	0	1.45662	1.24672	1.2063	1.96215	2.20294	1.3345	2.42629	2.46852	1.38906	1.57151	2.34546	1.76877	1.77509	1.59714	1.40407	1.29051	1.41404	1.566	1.86549	2.18527	1.23137	0.886159	0.960249	1.52419	1.17022	1.04761	1.07406	0.823946	0.843053	1.01732
1.28_290.11				290.11		1.28	33	15	15	3	0.482046	0.598814	0.323413	0.563481	0.636782	0.451786	0.709562	0.912069	0.76798	0.979512	0.847064	0.684437	0.511502	0.960717	0.271306	0.279489	0.357398	0.170743	0.466846	0.556626	0.400241	0.39446	0.474676	0.33114	0.386904	0.522736	0.519558	0.178471	0.279741	0.201121	0.182712	0.137368	0.169345
3.09_290.173				290.173		3.09	30	15	15	0	0.276138	0.130462	0.405225	0.494783	0.410531	0.35404	0.409571	0.397922	0.253407	0.3869	0.464508	0.255105	0.363871	0.28452	0.430942	0.204043	0.125797	0.171985	0.221318	0.0792348	0.232345	0.120935	0.167764	0.219212	0.09804	0.0890119	0.186226	0.0847364	0.182784	0.0624783
3.16_290.174				290.174		3.16	30	15	15	0	1.52944	0.402274	1.12957	1.71845	0.88594	1.11375	1.10582	1.43071	0.747209	1.68638	1.71129	1.12039	2.42349	1.13277	1.70431	1.08955	0.584641	1.23379	1.25481	0.226841	0.723843	0.264443	0.27598	0.648787	0.249831	0.0881356	0.649278	0.22315	0.182784	0.105081
5.46_290.187				290.187		5.46	21	0	15	6																0.197947	0.117904	0.111116	1.20527	0.421602	0.361141	1.22128	1.24136	1.80998	1.56945	1.78573	0.395798	0.434242	0.499516	0.345185	0.0435508		0.0533733		0.153679	0.102214	0.0793555	0.0732838
0.73_290.944				290.944		0.73	39	15	15	9	1.9466	1.9622	2.42952	2.36816	2.11623	1.91282	2.64832	1.18617	1.11912	0.859163	1.55157	1.17673	2.12153	2.69529	2.34843	1.52408	1.87709	1.34079	1.10326	1.47475	0.680727	0.255511	0.589593	0.323315	0.543577	0.517744	0.594846	0.58347	0.97424	0.417721	0.257295	0.202595	0.0992968	0.168123	0.145195	0.234928	0.0662567	0.102067
3.76_291.11				291.11		3.76	40	15	15	10	0.159711	0.194446	0.225965	0.258265	0.210248	0.215758	0.197705	0.199055	0.114858	0.143616	0.20386	0.329155	0.308012	0.307937	0.289679	0.168392	0.179369	0.173082	0.289211	0.185818	0.16824	0.122082	0.153716	0.200354	0.171947	0.151438	0.147235	0.177277	0.161375	0.108373	0.0980385	0.118443	0.0908353	0.233808	0.10875	0.100143	0.108465	0.112508	0.146518
1.48_292.001				292.001		1.48	30	15	15	0	0.701532	0.595411	0.535457	0.855954	1.11227	0.515159	1.06141	0.694402	0.60998	0.615599	0.468002	0.60844	0.580713	0.783326	0.420606	0.409914	0.789927	0.741934	0.872515	0.930772	0.779253	0.477734	0.388259	0.567864	0.529971	0.138789	0.672832	0.35685	0.379127	0.367845
1.64_292.086				292.086		1.64	32	15	13	4	0.293017	0.182619	0.162227	0.298836	0.309725	0.239756	0.384108	0.262246	0.269326	0.310048	0.41694	0.218028	0.204108	0.176669	0.146693	0.133305	0.140295	0.161754	0.198574	0.186609	0.179811	0.127629		0.185354	0.0545479	0.13915	0.0983449		0.140266	0.0648263	0.270236	0.3274	0.158766	0.222107
4.14_293.853				293.853		4.14	23	0	13	10																	0.082249		0.13449	0.134022	0.0904613	0.11675	0.204551	0.134166	0.206471	0.191367	0.15028	0.209133	0.234009	0.104241	1.19989	1.0467	0.771397	0.846571	0.452824	0.521446	0.201815	0.391216	0.0937653
0.78_294.095				294.095		0.78	30	15	15	0	0.356064	0.30051	0.303247	0.517108	0.414486	0.276452	0.701325	0.447161	0.464612	0.671921	0.715592	0.543456	0.454544	0.650444	0.446386	0.182808	0.230925	0.206523	0.333514	0.34245	0.191527	0.297099	0.328574	0.209665	0.234044	0.289409	0.348686	0.229732	0.173324	0.229788
2.77_294.131				294.131		2.77	30	15	15	0	0.761886	0.512858	0.599966	0.851776	0.800111	0.806782	1.54694	0.94752	0.993059	1.12297	1.11763	0.545313	0.79614	0.555353	1.19223	0.441218	0.461146	0.465187	0.460684	0.607872	0.436024	0.55089	0.789239	0.863406	0.383256	0.286422	0.515237	0.374178	0.294014	0.471416
2.68_294.131				294.131		2.68	33	15	15	3	0.536898	0.422301	0.517496	0.664496	0.655756	0.44646	0.963993	0.709894	0.723565	0.952824	0.798513	0.55193	0.541	0.479612	0.720896	0.363091	0.438674	0.377687	0.439519	0.550883	0.461786	0.518729	0.494761	0.676879	0.377004	0.32169	0.497976	0.327575	0.600503	0.694452				0.0865964		0.100868		0.0585647
2.16_294.131				294.131		2.16	30	15	15	0	0.505279	0.543193	0.433296	0.801946	0.65856	0.524458	0.425527	0.659298	0.954384	1.54418	1.60306	1.3147	1.2549	0.916365	1.01083	0.40992	0.281622	0.361493	0.275228	0.987905	0.376233	0.948237	0.321304	1.12054	0.82376	0.795859	0.817688	0.711427	0.705661	1.03168
2.05_294.131				294.131		2.05	30	15	15	0	0.327005	0.555219	0.477337	0.943732	0.767732	0.700163	0.386575	1.03958	0.966318	1.26073	1.24674	1.16631	1.22335	1.08006	0.527756	0.174779	0.4507	0.481652	0.562774	0.574765	0.193885	0.809973	0.462655	0.61099	0.699816	0.720554	0.753737	0.643957	0.676108	0.940156
1.93_294.131				294.131		1.93	24	15	9	0	0.332348	0.40299	0.304194	0.298881	0.773874	0.700163	0.412114	0.413975	0.96594	0.300443	1.24674	1.1656	0.250039	0.190648	0.98697	0.126081	0.120989	0.120428		0.270111	0.198145	0.131373	0.136699		0.114359					0.164515
5.28_294.183				294.183		5.28	40	15	15	10	0.630626	0.86821	1.26186	1.2213	0.672097	1.29016	1.3945	12.3996	0.745065	0.993827	1.37443	3.88779	0.805616	2.03699	0.898133	1.117	1.00304	1.23453	0.904589	0.919039	0.591015	0.749326	0.97295	2.2664	1.08329	1.08991	1.77711	1.03545	1.08473	0.712555	0.872665	0.397704	0.882083	0.583225	0.795	0.611524	0.637343	1.0199	0.82747
5.43_294.184				294.184		5.43	40	15	15	10	0.253724	0.100926	0.275305	0.390746	0.284064	0.646346	0.359351	1.70184	0.178605	0.243024	0.375193	0.883296	0.278929	0.284064	0.4158	0.290849	0.288753	0.184883	0.37168	0.186583	0.280264	0.315345	0.227861	0.406573	0.177952	0.166999	0.569959	0.138695	0.206541	0.103114	0.34423	0.160358	0.104506	0.294473	0.187767	0.114634	0.122319	0.381278	0.304888
6.15_294.218				294.218		6.15	40	15	15	10	2.22064	1.63964	2.25074	1.78705	1.50359	1.48157	1.22	0.567174	1.17085	1.87919	2.00489	0.699127	1.26914	1.87662	2.09336	7.846	7.0785	2.76319	5.97954	3.32416	2.81356	3.13279	7.68838	6.9838	3.00421	5.24174	3.31747	1.49323	1.33993	1.06091	9.31217	2.31229	10.3971	1.90183	18.0942	6.89954	2.75013	5.35116	1.0062
6.36_294.219		C18H30O3	294.219	294.219	0.49	6.36	39	15	14	10	0.465463	0.263008	0.329356	0.436891	0.357514	0.171791	0.869995	0.628204	0.277556	0.534086	0.571004	0.37903	0.23697	0.460557	0.618321	0.235053	0.595282	0.224782	0.745379	0.778084	0.39211		0.235964	0.358935	0.150665	0.38309	0.148856	0.175888	0.261859	0.210532	0.631896	0.591146	0.48624	0.316057	0.381526	0.884081	0.321365	0.319304	0.18651
6.12_294.219		C18H30O3	294.219	294.219	0.49	6.12	40	15	15	10	0.19836	0.159762	0.191169	0.12526	0.175047	0.103745	1.41054	0.848813	0.0855501	2.07522	0.895236	0.793495	1.26914	1.87662	2.09336	7.84585	0.123812	2.60026	5.84921	9.48943	3.21003	2.91406	0.183485	5.95089	3.12065	5.62832	3.31747	1.42631	1.17469	1.13908	0.168676	4.68365	0.165215	1.96323	18.0939	9.54714	4.31604	8.45807	1.0062
6.08_294.219		C18H30O3	294.219	294.219	0.49	6.08	40	15	15	10	7.38794	5.27075	6.46095	6.93756	5.60248	5.76713	9.41543	6.20491	4.17965	11.0475	10.1327	6.06037	5.21568	7.27394	7.92594	22.7765	21.5281	10.8355	48.5774	52.7798	23.8418	36.6285	24.1127	79.6421	27.3448	29.5506	13.668	13.8516	11.1569	9.51173	11.809	7.65048	16.6918	2.86668	77.6479	82.3617	31.5651	51.0582	1.60746
5.83_294.219		C18H30O3	294.219	294.219	0.49	5.83	34	15	15	4	4.85272	2.74601	3.9539	3.04001	3.47827	2.71956	4.61854	3.79006	2.3511	4.21125	3.40398	2.80674	2.51586	3.60852	3.54316	3.09724	3.19321	1.89164	3.5377	4.3834	2.22978	1.79615	1.17216	3.8397	1.42884	1.46927	1.22151	0.786926	1.64603	1.10321	0.198334		0.165394		0.514418	0.661856
5.12_294.219		C18H30O3	294.219	294.219	0.49	5.12	23	0	14	9																0.368128	0.32521	0.22283	2.85154		0.53171	1.11911	1.03456	1.44103	0.858239	0.312433	0.34052	0.169828	0.315499	0.0968046	0.636092	0.464512	0.261974	0.224798	2.66453	2.39496	1.25052	1.2077	0.072569
1.59_295.038				295.038		1.59	40	15	15	10	0.244708	0.204479	0.196342	0.344978	0.271168	0.293093	0.396278	0.214392	0.255532	0.385646	0.363786	0.117818	0.166834	0.133051	0.230472	0.454222	0.252018	0.21226	0.966955	0.85703	0.509586	0.646485	0.482307	0.738915	0.76396	0.681597	0.568897	0.368607	0.329964	0.244609	1.08573	1.17738	1.08143	1.80045	1.19815	1.2119	0.814792	1.08906	0.519674
4.14_295.851				295.851		4.14	33	8	15	10							0.080988	0.0698985	0.0792899	0.0889419	0.122331	0.161627	0.146114	0.137266		0.116365	0.121806	0.0722819	0.251581	0.230767	0.184226	0.210875	0.359888	0.26658	0.389504	0.367726	0.254506	0.418725	0.475549	0.223175	2.22934	2.06366	1.58289	1.71697	0.926015	1.02083	0.37527	0.773004	0.164506
2.57_296.053				296.053		2.57	30	15	15	0	0.287886	0.171246	0.210426	0.242412	0.308656	0.239447	0.802302	0.620628	0.29847	0.590428	0.993143	0.428749	0.657982	0.905546	1.18745	0.267973	0.117738	0.161028	0.264666	0.175712	0.147377	0.704867	0.365026	0.635041	0.426745	0.416421	0.362125	0.324859	0.513776	1.43295
1.83_296.066				296.066		1.83	30	15	15	0	0.924677	0.360104	0.450751	1.00172	0.952842	0.550769	1.46223	0.965996	0.751328	0.625747	0.780094	0.633045	0.481256	0.411539	0.440667	0.291684	0.382961	0.265129	0.553194	0.262369	0.281808	0.281417	0.227145	0.428673	0.277509	0.209559	0.228809	0.206391	0.193617	0.157965
1.09_296.069				296.069		1.09	36	15	15	6	1.71519	2.31428	2.91538	4.35164	3.282	2.359	3.18958	2.97964	1.69255	2.34935	3.13022	3.40832	3.27336	2.32758	1.89958	1.52404	2.04399	1.45939	3.45932	1.89284	1.76881	0.890362	1.61652	1.50632	1.73013	1.25857	1.68644	1.88842	1.35	0.741261	0.540943	0.27792	0.212877	0.235225		0.0713088
3.15_296.09				296.09		3.15	30	15	15	0	0.57378	0.210212	0.177211	0.433059	0.485702	0.308214	0.590502	1.42585	0.251758	0.353879	0.611775	0.401313	0.443452	0.344789	0.553375	0.262925	0.311435	0.516152	0.488187	0.0728801	0.204301	0.302257	0.290178	0.422716	0.244316	0.432228	0.244541	0.292716	0.172371	0.213488
2.96_296.09				296.09		2.96	30	15	15	0	0.38496	0.231101	0.191438	0.217471	0.431103	0.377727	0.494549	0.521453	0.341124	0.345441	0.376442	0.393797	0.303937	0.2482	0.57393	0.189643	0.309302	0.303315	0.424524	0.122195	0.229954	0.23747	0.22846	0.417489	0.270083	0.231269	0.313811	0.255087	0.115449	0.150181
1.12_296.11				296.11		1.12	30	15	15	0	1.30661	0.738975	1.01316	1.04631	1.36639	0.293323	2.68789	1.02752	1.61914	1.62887	1.57012	1.95351	1.28213	0.483826	1.04014	0.873797	0.657421	0.562597	0.101876	1.25618	1.17747	0.485738	1.07464	0.242209	0.629122	0.487225	0.651738	0.330335	0.347583	0.378378
1.57_296.111				296.111		1.57	33	15	15	3	14.3758	11.948	11.0444	14.515	16.6551	13.1297	32.2174	18.3517	14.9659	25.8777	20.5048	19.3877	20.6843	26.7583	44.8417	7.52221	9.40677	5.63899	10.7494	7.52564	7.71541	11.1513	9.34321	9.50793	9.59157	13.3738	10.0263	8.84457	22.3706	25.3614	0.0367213		0.0245093					0.036506
1.31_296.111				296.111		1.31	38	15	15	8	22.3022	24.4398	15.2496	34.0026	25.442	28.5452	39.1019	28.1743	21.9133	29.3754	25.5662	22.0838	20.9136	32.3793	34.0915	10.3561	13.3172	13.6933	13.9076	14.3833	12.5917	18.3888	15.4529	16.8968	19.3526	21.9997	21.9505	13.5819	29.2133	29.1828	0.129238	0.124461	0.132916	0.0720414	0.0671506	0.0614033		0.121258
3.19_296.147		C12H24O8	296.147	296.147	0.12	3.19	29	15	14	0	0.744054	0.463045	0.354595	0.801581	0.671313	0.45045	1.61321	0.584844	1.03389	1.83854	1.90488	0.64119	0.498614	0.707898	1.89233	0.140184	0.224138	0.106488	0.535775	0.325554	0.0838251	0.184099	0.120353	0.203501	0.0845059	0.175988	0.135412		0.143286	0.167173
3.11_296.147		C12H24O8	296.147	296.147	0.12	3.11	30	15	15	0	1.02284	0.732067	0.671758	1.43959	1.29548	0.848797	1.86931	0.876432	0.784251	1.15578	1.24674	0.610713	0.739794	0.891159	1.36244	0.287029	0.397345	0.285049	0.533701	0.325554	0.269123	0.184769	0.120353	0.278673	0.0973936	0.17642	0.134556	0.0995914	0.135723	0.167173
6.38_296.235				296.235		6.38	30	15	12	3	0.128065	0.200947	0.236604	0.214771	0.227021	0.126303	0.277081	0.986923	0.125257	0.223548	0.230577	0.332521	0.177102	0.411338	0.26038	0.213658		0.173925	0.31302	0.538395	0.203912	0.245536		0.55577	0.494246	1.29393	0.432128	0.299464	0.406915								0.648665	0.538819	0.185738
6.08_296.235		C18H32O3	296.235	296.235	0.14	6.08	40	15	15	10	5.5594	3.54267	4.89005	4.70218	4.08495	4.08872	7.49387	5.13998	3.25715	9.18174	9.42158	4.93201	4.1751	5.39384	6.03631	15.3857	13.3796	7.93604	36.2136	43.1173	17.5712	33.7183	15.7541	66.0228	24.3479	23.6488	10.7017	10.8633	8.8946	7.35722	4.62172	2.94405	5.07197	1.84221	58.3005	64.8249	27.1855	35.4866	0.220412
5.89_296.235		C18H32O3	296.235	296.235	0.14	5.89	40	15	15	10	0.236403	0.0720582	0.171853	0.136044	0.135997	0.103602	0.229689	0.11801	0.0937075	0.220358	0.151394	0.15593	0.166307	0.202736	0.242326	1.04951	0.922416	0.449416	2.08346	1.84911	1.19037	1.27482	1.11467	2.23956	1.4324	1.34704	0.598983	0.494429	0.498953	0.433156	0.419516	0.45187	0.658099	0.447522	2.26553	1.94315	0.581304	1.77326	0.146166
1.66_297.006				297.006		1.66	30	15	15	0	0.932651	0.918435	0.833693	1.48634	1.32765	1.19928	1.43565	1.15852	0.803456	0.916858	1.31283	1.30375	1.63771	1.71599	1.72481	0.847925	1.06104	0.889333	1.56288	0.954066	0.887257	0.613706	0.745026	0.849448	0.854792	0.71908	0.853251	0.830922	0.69144	0.50026
2.18_297.089				297.089		2.18	39	14	15	10	0.110613	0.0890049	0.099601	0.138318	0.128609	0.0728157	0.167185	0.0968086	0.0832251	0.125677	0.161468	0.123045	0.121697		0.183919	0.24101	0.218729	0.157765	0.39364	0.238907	0.212612	0.196679	0.190709	0.282721	0.20438	0.171791	0.17145	0.121222	0.179628	0.164809	0.351519	0.365278	0.226779	0.248661	0.346124	0.369313	0.14033	0.312338	0.0566924
4.14_297.849				297.849		4.14	23	0	13	10																0.0636097			0.144897	0.12734	0.0920765	0.101598	0.198533	0.142552	0.191461	0.181518	0.133746	0.223148	0.239705	0.119701	1.11943	1.02243	0.733275	0.792543	0.438774	0.507422	0.180152	0.386123	0.0800105
1.3_298.124				298.124		1.3	30	15	15	0	1.62515	1.35199	1.07366	2.32908	2.1917	1.66747	2.82824	2.31174	1.86705	2.63958	3.20908	2.58647	2.37876	2.07545	2.41985	0.977881	1.22023	1.06688	1.50864	1.51797	1.4175	0.955055	0.946261	1.34489	1.04447	0.996443	0.974929	0.77397	1.12299	0.97303
1.52_298.128				298.128		1.52	30	15	15	0	0.670516	0.716445	1.36905	1.28573	0.661842	0.700505	1.31488	2.08454	1.10115	2.56747	1.49362	0.977393	0.955085	0.62533	0.657828	1.02579	1.00194	0.850877	1.50793	1.74033	1.11636	1.39978	2.00192	2.12017	1.051	1.04925	1.72569	1.52521	1.23775	1.33728
6.08_298.16				298.16		6.08	40	15	15	10	6.77924	10.5647	33.0571	10.3749	10.7234	21.2481	10.0933	169.674	6.92705	13.3818	17.4583	13.7116	17.9687	12.1018	5.49183	8.73505	6.75385	17.0907	8.35184	5.42002	8.64628	6.27645	7.53578	13.9222	14.3284	6.17451	9.05742	13.5314	6.41218	0.272366	3.27323	2.77701	2.92464	6.23804	0.243553	5.95393	7.57898	6.07122	6.0041
6.05_298.16				298.16		6.05	40	15	15	10	3.28463	10.5647	33.0571	5.83584	5.0896	16.148	5.79252	169.674	3.47374	13.3879	17.4362	9.96382	17.916	5.18552	6.55401	6.77137	3.19422	17.0907	5.48644	4.56002	4.8124	3.02532	6.83072	13.9222	14.3284	5.12471	7.8698	13.1567	5.81023	0.160241	1.20841	1.2904	1.39713	3.30119	0.16008	5.95393	7.57898	6.07122	3.12388
6.21_298.25				298.25		6.21	39	15	15	9	0.892429	0.6135	1.01206	1.4404	0.566387	0.729332	1.63653	1.6889	0.76662	0.969489	1.08814	1.32308	1.09736	1.42519	1.18115	1.34876	1.64381	0.686789	1.67313	0.589828	0.91874	0.391844	0.950153	2.80337	1.24032	1.01592	1.11833	0.941637	0.616462	0.577438	2.11708	1.34559	1.19581	0.865647	1.45523	0.899964	0.824392	1.09345
2.45_300.007				300.007		2.45	33	15	15	3	0.446818	0.35248	0.418428	0.661796	0.390652	0.421377	0.385073	0.440035	0.3252	0.330328	0.39696	0.605853	0.601239	0.56892	0.434108	0.392454	0.439259	0.400804	0.652051	0.479037	0.379438	0.305859	0.338114	0.433925	0.499782	0.382004	0.437202	0.397845	0.272212	0.21552	0.112727	0.0820441	0.0370275
2.76_300.098				300.098		2.76	30	15	15	0	1.14393	0.650762	0.451342	1.40224	1.47296	0.777657	2.46534	1.9463	1.37613	1.91795	2.01957	1.29974	1.21254	0.967046	1.04287	0.362051	0.364	0.36924	0.530719	0.410695	0.377828	0.295858	0.197085	0.579643	0.21138	0.166437	0.265703	0.14403	0.120117	0.212332
2.66_300.098				300.098		2.66	30	15	15	0	0.394939	0.168431	0.105754	0.305142	0.368253	0.184948	0.492127	0.367625	0.373599	0.672101	0.543216	0.319106	0.225834	0.253812	0.294669	0.212192	0.225355	0.171482	0.293273	0.360694	0.227335	0.311142	0.24727	0.568666	0.200816	0.219608	0.198674	0.159742	0.168225	0.235126
6.38_300.104				300.104		6.38	38	14	14	10	0.118556	0.249258	0.242806		0.201977	0.311109	0.130226	0.270907	0.104395	0.217467	0.31066	0.483608	0.269823	0.4377	0.211515	0.270609	0.359522	0.26325	0.300823		0.11356	0.106085	0.211134	0.359016	0.0806923	0.2207	0.349474	0.207637	0.167179	0.192389	0.060873	0.0257158	0.153166	0.0548168	0.31141	0.1063	0.230225	0.295877	0.161366
2.78_301.116				301.116		2.78	30	15	15	0	1.16564	0.618591	0.616121	2.20594	2.09778	1.15928	3.09623	1.58322	1.91392	2.38327	2.22735	2.28697	2.66053	1.4977	2.07066	0.52659	0.777747	0.532953	1.61607	0.900464	1.07062	0.91001	1.05236	2.37578	1.18822	1.29331	1.09586	1.46682	1.31594	1.00426
4.11_302.095				302.095		4.11	31	10	15	6	1.73716	1.50767	0.0714622		2.50341	2.06169		0.606833	2.21649			0.0327454	2.83568		3.11199	0.140782	0.0897478	0.113756	1.0493	0.423674	0.419327	1.30849	2.29191	1.52171	1.1902	0.410285	0.323002	0.395107	0.189975	0.198046	0.0298956		0.0668262		0.156353	0.241281	0.0521224	0.0561893
2.76_302.095				302.095		2.76	28	15	13	0	0.483433	0.198603	0.207289	0.486034	0.398621	0.270889	0.892553	0.573809	0.45556	0.654451	0.569479	0.334106	0.326213	0.250749	0.343761	0.110273	0.10455	0.104605	0.116342	0.115011	0.102761	0.10525	0.0610483	0.139661	0.0980562	0.0603225	0.0795405			0.102265
2.96_302.136				302.136		2.96	30	15	15	0	0.813722	0.955462	2.07984	1.72093	1.81507	1.33164	2.48692	2.21842	1.72156	2.42929	2.26903	1.45477	1.88571	1.92506	1.64174	1.23836	0.815136	0.730281	1.14258	0.888429	1.07451	1.19172	1.65802	1.48998	1.13005	0.644647	2.08777	0.789486	0.739862	0.683596
1.11_303.096				303.096		1.11	29	14	15	0	0.461245	0.202237		0.475864	0.644894	0.333522	0.859277	0.591244	0.551064	0.56841	0.97231	1.02589	1.07475	1.0771	0.649413	0.119439	0.275246	0.190972	0.530261	0.223833	0.267479	0.272684	0.229583	0.401438	0.537277	0.695365	0.498642	0.505237	0.579413	0.252864
1.74_304.079				304.079		1.74	30	15	15	0	1.0448	0.519059	0.801691	1.14186	1.46405	0.583105	1.13078	1.07255	1.06078	1.54161	1.34794	1.52849	0.921908	0.780844	0.911693	1.69839	0.854598	1.78809	1.9295	0.348511	0.765808	0.622738	0.513263	0.662576	0.607799	0.388592	0.456546	0.492581	0.418453	0.825193
1.67_304.079				304.079		1.67	30	15	15	0	0.958412	0.97976	0.970246	1.156	1.35698	0.818996	1.42199	1.13254	0.86162	0.988138	1.41395	0.849863	0.879395	0.872871	0.633343	0.509253	0.724646	0.597435	0.774882	1.11428	0.660122	0.634098	0.683769	0.66091	0.546767	0.572455	0.589636	0.459827	0.534885	0.582308
1.42_304.079				304.079		1.42	30	15	15	0	2.77898	1.01735	0.958806	2.62412	3.0887	1.77458	3.62564	2.52072	2.20149	2.50881	3.25339	2.56661	2.80652	2.2847	2.59118	1.24283	1.73326	1.49381	2.2292	1.76043	1.47784	1.35885	1.36134	2.09518	1.25326	1.09415	1.71101	0.915044	0.988194	1.09921
0.5_304.079				304.079		0.5	30	15	15	0	0.939349	0.640925	0.522993	1.51529	1.37858	0.791093	1.04497	0.573805	0.693517	0.772396	1.29444	1.4422	1.15357	0.518513	0.879281	0.368516	0.314986	0.559901	0.756756	0.619066	0.229257	0.543662	0.760932	0.493208	0.714788	0.658788	1.17976	0.704697	0.786902	0.557963
3.47_304.129				304.129		3.47	10	0	0	10																															0.265291	0.268311	0.57745	0.642286	0.331355	0.331544	0.280156	0.295325	0.187181
3.1_304.153				304.153		3.1	30	15	15	0	4.6187	3.66048	8.26005	10.0005	9.1964	7.68311	11.2866	12.8255	8.1789	13.9342	13.2791	9.68275	12.9103	11.1514	12.3692	5.50288	3.24556	4.07053	6.34252	3.20996	5.15813	5.51554	5.88952	7.30665	4.51572	2.45593	11.0877	3.99075	3.11878	2.47464
1.42_305.112				305.112		1.42	30	15	15	0	0.351312	0.15747	0.200665	0.261852	0.338244	0.260618	0.466352	0.273776	0.289212	0.306856	0.30718	0.202023	0.32957	0.269182	0.282137	0.152778	0.213753	0.14179	0.221048	0.157114	0.177836	0.173658	0.226913	0.213197	0.0982011	0.0927532	0.163079	0.0933611	0.19926	0.151659
1.91_306.017				306.017		1.91	30	15	15	0	0.562872	0.38647	0.462071	0.414109	0.78013	0.223569	0.843724	0.568514	0.557181	0.370043	0.319576	0.225273	0.320592	0.502729	0.310445	0.148361	0.423879	0.408318	0.316127	0.567076	0.405212	0.393257	0.314901	0.403818	0.269526	0.071144	0.292373	0.218523	0.187341	0.244438
2.87_306.078				306.078		2.87	29	14	15	0	0.229667	0.430176	0.250982	0.323381	0.273693	0.201908	0.747838	0.631759	0.532158	0.381332	0.663481	0.271993	0.213646		0.220152	0.174413	0.0847857	0.145417	0.181123	0.226208	0.1141	0.171554	1.2544	0.52152	0.0916946	0.157303	0.0668793	0.0754744	0.128339	0.335825
1.84_306.081				306.081		1.84	30	15	15	0	34.6439	13.0849	22.8901	34.7128	18.9019	47.8873	36.0106	23.174	29.2516	22.5098	23.098	18.4969	32.7254	54.8438	53.8699	11.3601	16.4738	20.6051	7.62667	12.6943	13.2089	14.017	11.5049	16.6244	11.8029	19.7129	22.2768	8.1921	14.7489	15.5823
1.83_306.092				306.092		1.83	30	15	15	0	21.3962	10.0617	11.7132	32.2067	28.4793	14.3493	44.9265	24.3521	19.189	16.342	25.1139	25.8281	12.4466	7.55888	11.8557	8.19636	12.1303	6.08585	21.2287	6.62149	8.57577	5.21548	4.7609	9.88658	5.46452	3.96026	4.12056	5.36407	2.81668	3.20964
1.31_306.095				306.095		1.31	39	15	15	9	1.94791	0.79966	0.508291	2.05108	1.9225	1.59968	2.17644	1.85209	1.83298	3.64093	2.96273	0.51222	0.819052	0.903842	0.625944	0.854288	0.732141	0.733069	1.13052	1.03044	0.705658	0.576258	0.327565	0.823861	0.415994	0.194306	0.39281	0.232366	0.272774	0.0577162	8.05235		4.51038	4.32639	2.52412	3.09956	0.894425	1.52909	0.254763
3.76_306.096				306.096		3.76	40	15	15	10	13.1526	18.687	24.1882	23.3644	19.2379	20.7149	13.2706	12.8392	6.59328	8.88502	14.7623	32.3401	27.6612	29.1637	26.443	18.2119	20.8103	19.8867	33.4421	21.2775	17.2286	9.60362	13.277	14.6863	15.9712	13.3276	14.6794	18.911	14.8571	8.66739	11.4649	13.6545	10.8501	28.2239	15.4407	13.2253	15.3402	13.8093	20.3635
1.31_306.107				306.107		1.31	40	15	15	10	1.95486	0.732729	0.616497	2.02244	1.82672	1.60061	2.14786	1.82996	1.80063	3.7816	2.99729	0.872747	0.897958	0.716737	0.60554	0.900494	0.692429	0.741167	1.09499	0.983326	0.72183	0.582559	0.314497	0.813337	0.417988	0.387108	0.385606	0.226336	0.251524	0.211401	8.08398	6.71668	4.49011	4.30055	2.54574	3.1136	0.887669	1.52014	0.267215
2.09_306.971				306.971		2.09	25	0	15	10																0.24774	0.176408	0.123486	0.661261	0.38039	0.322324	1.03044	0.670764	0.865456	0.868835	0.643366	0.655536	0.640545	0.45016	0.392318	0.756477	0.722561	1.21471	1.02528	1.57142	1.18902	0.725495	1.13571	0.213601
1.58_307.128				307.128		1.58	33	15	15	3	2.09027	1.6472	1.22385	2.75069	2.94869	1.76526	2.97243	2.52982	2.29498	3.18939	3.71431	2.64822	2.78042	2.64145	2.71405	1.1573	1.45418	1.21543	1.77855	1.73385	1.49317	0.808552	0.868701	1.72686	1.00517	0.815927	1.03434	0.644577	0.696672	0.490072	0.041457	0.0368858	0.0507941
3.79_308.009				308.009		3.79	40	15	15	10	3.14614	3.62544	4.66386	5.50548	4.25274	4.02735	3.96974	2.93014	2.09424	3.01504	3.89362	5.71232	5.84661	6.90454	5.56655	0.801563	4.28415	3.90267	6.37617	3.87449	3.39616	1.04284	3.10886	3.21079	3.4616	1.82735	3.25123	3.64937	2.81299	2.10203	2.06567	2.11867	1.93054	4.53232	2.63353	2.28991	2.61753	2.52388	3.20867
3.73_308.01				308.01		3.73	40	15	15	10	0.960007	1.59115	0.737539	1.79067	1.05187	1.30962	1.50785	1.14356	0.630326	0.888073	1.23062	0.989142	1.93601	2.4771	1.82541	1.39304	1.42705	1.29939	1.82927	1.49771	1.21745	0.502899	1.04233	0.888344	0.366282	0.920193	1.09228	1.05941	1.03629	0.625531	0.691349	0.667345	0.639258	1.54239	0.885502	0.816045	0.941828	0.852539	1.14076
3.76_308.072				308.072		3.76	40	15	15	10	12.173	14.4111	18.2293	19.1353	16.6723	16.1035	15.2821	16.0875	8.68774	10.9315	17.0577	30.3971	22.489	24.1339	22.5612	13.0752	14.9019	14.0577	24.4083	15.1656	12.3958	8.51691	12.4176	16.1059	12.9996	11.5412	11.8514	14.2344	12.2074	8.7919	9.10791	9.9382	8.62877	18.323	9.91131	8.51408	9.4561	9.66775	11.9542
2.61_308.089				308.089		2.61	30	15	15	0	1.37658	1.05377	1.99481	1.37781	1.13225	1.65979	2.56427	1.82559	1.75418	1.89601	1.54303	0.847365	1.16203	1.27862	1.22298	0.662038	0.570844	0.746336	0.459827	0.954364	0.584185	1.08266	0.581536	1.12805	0.49314	0.794528	1.08453	0.473375	1.00703	1.34896
3.51_308.09				308.09		3.51	30	15	15	0	0.574559	0.120511	0.222986	0.678402	0.22348	0.318527	0.443961	0.511364	0.20689	0.592009	0.6704	0.636568	0.349991	0.17262	0.230744	0.272161	0.321214	0.209396	0.706179	0.2668	0.269098	0.259689	0.201233	0.128036	0.311392	0.429173	0.244151	0.149321	0.135278	0.146607
3.42_308.09				308.09		3.42	30	15	15	0	0.464414	0.101144	0.14543	0.422414	0.363576	0.302544	0.268771	0.633912	0.192814	0.392698	0.460998	0.447255	0.313765	0.193917	0.214094	0.226375	0.258751	0.215792	0.585068	0.151756	0.227137	0.214371	0.190648	0.212792	0.303595	0.212869	0.250672	0.0906153	0.121362	0.0334109
1.6_308.113				308.113		1.6	30	15	15	0	0.502737	0.40613	0.284305	0.688693	0.691469	0.554635	0.678717	0.560404	0.534514	0.706828	0.723462	0.696705	0.734179	0.62715	0.599731	0.429916	0.455424	0.333868	0.642173	0.544837	0.389181	0.227914	0.290547	0.541783	0.34671	0.299377	0.399895	0.26884	0.313642	0.211767
3.35_308.146				308.146		3.35	30	15	15	0	0.410157	0.377586	0.376709	0.414584	0.399769	0.281905	0.774865	0.470878	0.40867	0.565778	0.440806	0.342726	0.437362	0.340447	0.495976	0.199885	0.190943	0.212208	0.157167	0.38568	0.172185	0.186356	0.190131	0.425606	0.150051	0.125948	0.160224	0.0922705	0.151873	0.139528
3.04_308.147				308.147		3.04	30	15	15	0	2.18417	1.64594	0.759554	2.95212	3.03696	1.75522	5.62349	2.86081	2.70888	5.24604	5.89736	2.24387	2.44451	3.01749	4.35813	1.30525	1.45554	1.12529	1.48044	1.94257	1.55324	1.6143	1.28049	2.95809	1.50417	1.62863	1.23153	1.84148	1.71265	1.95302
2.71_308.147				308.147		2.71	30	15	15	0	0.542094	0.901828	0.575609	1.32837	1.12507	0.91414	1.65506	0.820318	1.40838	1.68291	1.77822	1.59582	1.36205	1.22415	1.12582	1.02971	0.827901	0.799472	0.835916	0.759855	0.791061	0.427529	0.522799	0.759159	0.568019	0.35635	0.64872	0.886298	0.328347	1.57349
5.57_308.198				308.198		5.57	24	0	15	9																0.372544	0.199013	0.0805457	1.23905	0.295953	0.477977	1.13292	1.28779	2.97689	2.02971	2.04278	0.473919	0.457462	0.731773	0.441732	0.123266	0.0652819	0.0829646	0.102135	0.223896	0.114665	0.0880062	0.161091
5.46_308.198				308.198		5.46	27	3	15	9	0.102573									0.178477	0.181707					1.14067	0.779059	0.372537	6.74998	1.96909	2.27823	7.68156	7.28447	10.6619	9.10245	10.5678	2.36878	2.47508	2.93178	2.02616	0.447006	0.315798	0.33975	0.099234	1.22613	0.771114	0.479027	0.82061
5.25_308.198				308.198		5.25	21	0	14	7																0.0946032	0.106063		1.57431	0.372852	0.318062	0.458054	1.45042	2.28628	1.72741	1.3452	0.26023	0.298429	0.479003	0.375955	0.0885791	0.0513865	0.0527183		0.0495278	0.0803829	0.0683186	0.0729849
1.75_309.061				309.061		1.75	32	14	15	3	0.269354	0.103095		0.229759	0.379567	0.156708	0.536814	0.439851	0.425526	0.493756	0.546505	0.375325	0.285314	0.205854	0.247362	0.159885	0.158136	0.150928	0.226124	0.143426	0.180812	0.186266	0.136541	0.252899	0.138181	0.14241	0.149384	0.109445	0.11989	0.148931					0.0480509	0.0374124		0.0509254
2.66_310.126				310.126		2.66	40	15	15	10	5.24119	2.85053	1.73347	5.06837	6.06037	3.81302	7.23222	5.21085	4.7247	9.79121	8.76578	5.05389	5.92802	4.9266	5.79664	3.31394	3.76555	3.04115	4.00198	4.9388	3.61793	3.01436	2.94441	6.28694	2.62406	2.89557	2.6166	2.34437	2.44251	2.56901	0.148371	0.179895	0.275923	0.36273	0.161154	0.142542	0.0932781	0.157412	0.068766
1.55_310.126				310.126		1.55	39	15	15	9	5.5012	2.68645	3.46178	6.84628	7.034	4.83397	8.48843	6.02155	5.81178	8.36951	9.41825	7.26088	7.30767	5.76078	6.24001	3.15857	3.75641	3.32867	4.42196	4.03248	4.19146	2.48345	2.50897	4.36643	2.82535	1.62487	2.47688	1.95918	2.10235	1.28005	1.86047	2.0461	1.85754	1.42767	0.269952	0.348817	0.0673065	0.208592
2.77_310.127		C12H22O9	310.126	310.127	-0.62	2.77	30	15	15	0	14.2714	11.3976	8.51062	26.816	27.002	14.5389	44.1069	30.1737	23.0534	32.4793	40.4026	25.9251	24.6657	20.9704	21.2925	6.54682	6.69983	6.59814	10.4597	6.42272	6.92992	4.27726	2.89841	9.30577	2.85981	2.45739	3.92278	2.52929	1.88286	2.59708
2.03_310.127		C12H22O9	310.126	310.127	-0.62	2.03	30	15	15	0	3.28459	2.54364	2.45321	3.23196	4.37909	2.8238	8.47564	3.30491	3.75491	6.0659	4.90031	4.27155	6.66979	9.55188	15.0458	1.52843	2.17902	1.18204	2.26885	1.67599	1.6854	2.0632	2.33206	2.27116	2.0185	3.8044	2.26442	2.35911	7.61873	9.02393
3.73_310.162				310.162		3.73	15	15	0	0	0.391196	0.179394	0.265646	0.253989	0.217364	0.20433	0.81109	0.349292	0.391544	0.555873	0.960203	0.253895	0.205868	0.28543	0.915023
5.33_310.18				310.18		5.33	39	15	15	9	0.17574	0.155215	0.630672	0.494815	0.149587	0.222428	0.301431	4.17444	0.104906	0.253066	0.223548	0.412242	0.23521	0.250631	0.240544	0.197615	0.275087	0.192951	0.440436	0.286921	0.19924	0.159918	0.306235	0.392879	0.274953	0.280287	0.424251	0.13373	0.128116	0.163895	0.189535	0.0711203	0.0790719	0.111702	0.235246	0.306275		0.17788	0.120396
6.31_310.181				310.181		6.31	40	15	15	10	5.08003	6.35172	10.4303	6.5013	7.45557	11.2288	8.2218	69.011	4.21735	7.07002	8.94202	20.409	7.93973	10.6648	9.44725	7.34522	5.97923	5.85421	10.5753	6.25636	5.79945	4.28039	8.66333	6.71897	6.51923	5.40486	7.10159	6.92823	5.32079	4.49034	3.69519	2.87604	3.53053	6.88947	4.14441	3.14492	4.06079	3.91971	6.33658
5.79_310.212				310.212		5.79	40	15	15	10	0.0749052	0.144098	0.432686	0.314955	0.326811	0.157777	0.419756	0.0731942	0.183525	0.473008	0.381271	0.438594	0.487644	0.713214	0.76146	0.434297	0.876763	0.138109	0.320046	0.382068	0.812141	0.288078	0.5906	1.37747	0.818652	0.51468	0.726879	0.415553	0.479303	0.443449	2.14976	1.46017	1.5357	0.870361	0.44161	0.75108	0.374257	0.249574	0.141874
5.67_310.213				310.213		5.67	40	15	15	10	0.307053	0.157498	0.252711	0.156018	0.0977961	0.230064	0.20423	0.129028	0.133897	0.24744	0.155674	0.121582	0.0964231	0.35778	0.237981	0.802327	0.770201	0.200815	0.17513	1.23322	0.0638687	0.0981938	0.151154	0.544774	0.301535	0.176368	0.308506	0.231689	0.227001	0.227717	0.415325	0.462348	0.498859	0.413769	1.88056	1.34761	0.461738	0.269358	0.0958632
5.26_310.213				310.213		5.26	30	15	15	0	1.73744	0.966862	3.2972	1.04832	1.95365	0.715717	4.02728	1.30985	0.873544	1.74525	1.63344	3.85911	0.927513	0.402352	1.65636	1.75408	1.56444	0.642742	2.59666	1.96367	1.44787	1.66159	1.03116	1.46769	1.1219	1.82525	0.415091	0.729504	0.983459	0.596576
5.77_310.214				310.214		5.77	40	15	15	10	0.392752	0.373988	0.787999	0.547371	0.546059	0.460344	0.400971	0.754123	0.197964	0.287335	0.696999	0.407781	0.734137	0.797781	0.849458	0.538332	1.01735	0.444969	1.20852	1.06025	1.02871	0.915383	0.722092	2.06672	1.02302	1.14466	0.714152	0.486515	0.416091	0.405938	0.962659	2.43335	0.85159	0.29363	1.33902	1.10026	0.591842	0.91242	0.0882418
5.66_310.215		C18H30O4	310.214	310.215	-0.59	5.66	40	15	15	10	0.488452	0.532349	0.687587	0.756747	0.436533	0.531146	0.324389	0.531969	0.455787	1.29415	1.16058	0.90624	0.588069	0.839739	0.293252	2.13533	1.84855	0.479999	3.93368	4.10866	1.35495	2.04137	2.02833	3.761	1.49025	2.47511	1.36171	1.40168	1.16042	0.635221	3.93646	4.16715	3.70751	0.731653	4.61588	3.61911	1.6343	2.99471	0.581989
1.65_310.996				310.996		1.65	30	15	15	0	0.496756	0.358558	0.394917	0.659529	0.728676	0.576431	0.821739	0.678626	0.396616	0.415901	0.758734	0.645162	0.778599	0.714899	0.818797	0.338052	0.49533	0.394405	0.778801	0.44062	0.453818	0.252542	0.316033	0.427123	0.342106	0.329755	0.361773	0.337084	0.318814	0.242538
1.59_311.009				311.009		1.59	38	13	15	10	0.0900827	0.100818	0.146201	0.13871	0.0995785	0.160856	0.125658	0.145179	0.112678	0.193272	0.109016	0.0819948			0.114147	0.286187	0.16138	0.102397	0.57403	0.482998	0.280538	0.325412	0.350056	0.473412	0.511586	0.425498	0.306675	0.235617	0.210314	0.172959	0.603917	0.613833	0.649121	1.31745	0.776757	0.727907	0.598652	0.689574	0.438331
1.05_311.032				311.032		1.05	28	3	15	10			0.18876		0.191857	0.16339										0.259581	0.150871	0.152957	0.455881	0.353642	0.328861	0.25676	0.215761	0.204043	0.183076	0.206081	0.153777	0.118366	0.155887	0.124927	0.374689	0.363798	0.39393	0.778751	0.518903	0.317797	0.329341	0.514261	0.188021
2.24_311.1				311.1		2.24	30	15	15	0	1.22897	0.792761	0.825093	1.87424	2.12607	1.14304	2.73742	1.91533	1.76286	2.34453	2.76599	2.20073	2.28729	1.83622	1.69517	0.870026	1.22062	0.87194	1.88615	1.42532	0.880864	1.52504	1.30488	1.87367	1.81615	1.69558	1.58417	2.02525	2.03145	2.31714
2.17_311.1				311.1		2.17	30	15	15	0	2.04206	1.2746	1.0194	3.03695	3.20144	2.04238	4.34099	2.92035	2.6728	3.56368	4.51732	3.71845	3.43515	2.7357	3.03282	1.21035	1.63583	1.19055	2.88602	1.93545	1.65212	2.39095	1.97558	3.10243	2.74556	3.12224	2.69146	2.9638	3.17148	3.75405
0.73_311.977				311.977		0.73	37	15	15	7	1.00658	0.740843	1.08543	1.20746	1.3357	0.920175	1.63409	0.829804	0.772146	0.667415	0.937319	0.72737	1.23323	1.27899	1.71464	0.669522	0.801437	0.421487	0.522835	0.541576	0.437284	0.170418	0.504851	0.210341	0.368406	0.356888	0.33065	0.432874	0.670235	0.440286	0.117428	0.0842504	0.0698584		0.0962299	0.100743		0.057603
2.61_312.061				312.061		2.61	25	14	11	0	0.218935	0.23502	0.592628	0.191378	0.13085	0.414967	0.403851	0.327016		0.332895	0.160182	0.222249	0.368524	0.473689	0.372317	0.178845		0.0963857		0.288036	0.117656	0.0957046	0.114798	0.0775575	0.0949813	0.131815		0.137385	0.279686
2.6_312.082				312.082		2.6	30	15	15	0	0.900918	0.505531	0.549999	0.898168	0.789356	0.474321	1.08627	0.782564	0.457231	0.46527	0.967404	0.434376	0.466097	0.491419	0.444033	0.405076	0.484275	0.483525	0.606047	0.29256	0.351731	0.437254	0.142902	0.333509	0.224953	0.310345	0.293238	0.161665	0.08257	0.340214
3.09_312.085				312.085		3.09	30	15	15	0	0.638491	0.637425	0.491527	0.833939	0.692463	0.520272	1.53131	1.31299	0.971675	0.952196	1.74065	0.779805	0.489999	0.365788	0.759434	0.237537	0.178663	0.218984	0.425319	0.358908	0.283617	0.396289	0.372246	0.40341	0.345303	0.483226	0.529217	0.47225	0.154612	0.543104
2.52_312.085				312.085		2.52	30	15	15	0	1.79409	0.902785	0.917886	1.3148	1.77303	1.08384	1.6813	1.78755	0.977414	0.840471	1.60026	0.946095	0.76611	0.949097	1.3177	0.936623	1.13249	1.28193	1.23767	0.484756	0.793868	0.852678	0.573071	1.11176	0.492028	0.559042	0.627863	0.372779	0.57195	0.529313
2_312.141				312.141		2	31	11	15	5					0.284412	0.108356	0.314956	0.426612	0.167726	0.401998	0.698842	0.161861	0.393078	0.36697	0.267907	0.298635	0.295774	0.107461	0.379073	0.307031	0.175112	0.240743	0.26559	0.518121	0.348999	0.246946	0.229417	0.313333	0.213228	0.550657	0.0745622	0.0646574	0.11171		0.0601116	0.0709677
1.83_312.142		C12H24O9	312.142	312.142	0.03	1.83	28	13	15	0	0.315561			0.143618	0.0675521	0.243391	0.23229	0.189376	0.445951	0.224379	0.746709	0.325353	0.487753	0.238109	0.397081	0.484557	0.531182	0.23152	0.641933	1.17332	0.559342	0.846982	0.983247	1.54498	0.673402	0.812084	0.658222	0.875109	0.530432	1.24538
1.61_312.142		C12H24O9	312.142	312.142	0.03	1.61	30	15	15	0	1.48186	0.958182	0.789452	2.02187	1.96143	1.35994	2.29709	1.75271	1.58277	2.63347	1.99532	2.33734	2.54603	1.86755	2.00849	0.987842	0.955529	0.859454	1.69005	1.43135	1.12076	0.578988	0.606656	1.29079	0.859522	0.866527	0.771543	0.639452	0.687043	0.615764
6.08_312.222				312.222		6.08	21	15	0	6	1.67723	0.678551	1.25809	0.678474	0.842145	0.483215	1.19184	0.812046	0.550941	1.21011	1.13941	0.605673	0.568882	2.29294	1.449																1.53126	0.813382	1.84163					1.43119	0.27602
6.08_312.23				312.23		6.08	22	15	0	7	1.7451	0.630291	1.31426	0.741921	1.1212	0.611378	1.37306	0.789452	0.509002	1.06169	1.07981	0.710139	0.602614	2.30798	1.23426																1.53522	0.803728	1.76478	0.301549				1.51555	0.220085
5.59_312.23		C18H32O4	312.23	312.23	0.06	5.59	40	15	15	10	0.468914	0.459407	0.632289	0.433162	0.360024	0.453491	0.611977	0.716976	0.290837	0.835596	0.693917	0.415813	0.47993	0.567726	0.592621	1.26712	1.49948	0.621485	4.81285	2.16034	1.23234	2.74865	2.61329	2.85776	2.90744	1.43394	1.37372	0.682711	1.2101	0.46369	2.11282	1.87046	2.23493	0.599503	2.20845	2.28303	0.848992	2.74387	0.118245
5.48_312.23				312.23		5.48	40	15	15	10	4.22651	2.40878	8.54076	3.23727	5.65449	2.298	15.1061	3.28724	3.03887	8.48309	5.70163	14.4489	3.41558	1.45409	6.49689	5.51503	6.3598	2.31957	14.3588	5.94418	7.77432	10.686	6.40587	8.87376	7.31959	11.4661	2.41595	4.59763	6.40898	3.72328	5.56637	4.47487	4.96388	1.52825	14.263	12.5196	5.14477	4.96627	0.0944048
5.12_312.23				312.23		5.12	25	0	15	10																4.7144	4.47557	2.62263	34.8664	8.46542	7.31608	15.0627	12.5059	17.8635	11.2033	4.29414	4.40844	2.32033	4.22491	1.25867	7.60804	5.05157	3.30013	2.34245	34.7109	29.6638	15.4939	14.9484	0.825346
1.37_313.101				313.101		1.37	38	15	15	8	0.203429	0.200608	0.5218	0.16343	0.233779	0.172372	0.706278	0.481489	0.300066	0.489862	0.20757	0.179057	0.259583	0.280718	0.54098	0.482677	0.399199	0.250543	1.12436	0.648759	0.765499	0.417742	0.470232	0.604797	0.489035	0.325422	0.293859	0.196395	0.324865	0.17668	0.347218	0.347904	0.321339	0.215387	0.126357			0.0631102	0.209924
1.26_313.115				313.115		1.26	38	13	15	10	0.249848	0.450812	0.497011	0.755066	0.322533	0.682763		0.385364	0.278834	0.298813	0.417935		0.699042	0.365256	0.205418	0.234389	0.231705	0.573071	0.35824	0.373353	0.318843	0.381457	0.385102	0.405134	0.348564	0.262204	0.289156	0.517378	0.557594	0.714428	0.453439	0.44365	0.664621	0.756389	0.451065	0.291748	0.404733	0.464014	0.221438
2.34_314.064				314.064		2.34	28	15	13	0	0.440602	0.448071	0.398027	0.572702	0.516305	0.257011	1.19111	0.39821	0.70162	0.421049	0.805046	0.391822	0.381509	0.357762	0.699248	0.273519	0.216577	0.343463	0.256099	0.41113	0.234149	0.429902	1.58998	0.534178	0.262065		0.225748	0.287346	0.378418
1.93_314.064				314.064		1.93	30	15	15	0	0.492899	0.462185	0.315209	0.671462	0.608392	0.406042	0.812417	0.461648	0.523904	0.449837	0.75397	0.526675	0.623588	0.311096	0.555398	0.354571	0.324646	0.32751	0.283803	0.422558	0.256386	0.340778	1.27502	0.53921	0.322333	0.211613	0.26738	0.300537	0.301918	0.362823
2.74_314.1		C14H18O8	314.1	314.1	0.2	2.74	30	15	15	0	0.377179	0.198017	0.137114	0.381674	0.447298	0.301625	0.477177	0.435685	0.332209	0.378151	0.320852	0.332205	0.295319	0.224535	0.192523	0.231862	0.284339	0.201935	0.31692	0.266222	0.241495	0.1576	0.140108	0.268706	0.157005	0.101665	0.160267	0.0949844	0.126666	0.122474
1.97_314.1		C14H18O8	314.1	314.1	0.2	1.97	30	15	15	0	0.528418	0.237518	0.277122	0.503802	0.572772	0.371573	0.979174	0.610186	0.524376	0.708985	0.787235	0.579137	0.507275	0.428822	0.548955	0.232824	0.311339	0.248596	0.445613	0.336949	0.314185	0.356584	0.242751	0.458375	0.29121	0.28552	0.343828	0.245546	0.324374	0.420465
3.27_314.113				314.113		3.27	30	15	15	0	0.154232	0.681116	0.170926	0.707815	0.0992014	1.55	0.908049	0.733195	0.903644	1.87284	0.167219	0.118665	0.987835	0.941037	0.668617	0.430274	0.751042	0.393077	0.876798	0.580714	0.379896	0.543879	0.466695	0.707659	0.675385	0.840358	0.647399	0.690444	0.343591	0.651381
1.26_314.121				314.121		1.26	39	15	15	9	0.855968	0.769778	0.461437	1.52493	1.13127	0.874498	1.40701	1.21894	0.995747	1.89192	1.94416	1.54565	1.91748	1.41914	1.9627	0.616797	0.771747	0.575068	0.761536	0.98735	0.791514	0.630234	0.532479	0.73063	0.667112	0.532969	0.587304	0.685594	0.571281	0.678822	0.0712116	0.096855	0.12507	0.120117	0.0620261	0.060026	0.0632923	0.0898067
5.61_314.244				314.244		5.61	39	15	15	9	0.249707	0.182723	0.264871	0.281083	0.260898	0.210163	0.305138	0.635995	0.179311	0.240471	0.291934	0.261351	0.397865	0.254364	0.385007	0.496288	0.470022	0.208704	0.910566	1.22204	0.490219	0.339644	0.407708	0.190021	0.388604	0.487023	0.376092	0.188652	0.201014	0.182263	0.19688	0.376436	0.10904	0.24238	0.403022	0.467627	0.244896	0.315771
5.65_314.245				314.245		5.65	39	15	15	9	0.169089	0.184357	0.147193	0.289235	0.186028	0.198103	0.209752	0.340678	0.149037	0.211571	0.12114	0.240376	0.317771	0.212505	0.266134	0.401198	0.414243	0.149364	0.778525	0.562092	0.388926	0.274495	0.33716	0.489955	0.37329	0.392849	0.134025	0.159711	0.163529	0.146422	0.139256	0.15571	0.16468	0.277042	0.491287	0.377275	0.133486	0.261765
6.35_314.246				314.246		6.35	27	15	9	3	0.405384	0.161651	0.328047	0.196155	0.194574	0.192643	0.404813	1.17749	0.158415	0.203492	0.268551	0.422242	0.338327	0.564202	0.480992	0.213253	0.324856	0.172426		0.246957	0.162277						0.208077	0.166381	0.157785	0.105925				0.119949					0.0614132
5.75_315.277				315.277		5.75	25	15	10	0	0.216284	0.217191	0.151922	0.111793	0.179168	0.142287	0.266997	0.322982	0.1671	0.224384	0.435037	0.107695	0.323968	0.469831	0.574136	0.168362	0.0797199	0.172667	0.49103		0.136614			0.367349	0.308428	0.406886	0.194125			0.132636
4.06_316.074				316.074		4.06	24	0	15	9																0.347158	0.181558	0.163263	1.49754	0.752262	0.745323	1.26183	0.860768	1.53335	0.705362	0.638638	0.307876	0.260209	0.244459	0.212771	0.564729	0.616745	0.751074	0.380849	0.588133	0.928957	0.126034	0.190374
2.01_316.079		C13H16O9	316.079	316.079	0.4	2.01	30	15	15	0	1.20493	2.69643	3.0983	3.10161	2.85047	2.33044	5.52443	5.59925	4.76493	2.85372	3.03281	1.44794	1.92754	4.62582	2.88284	1.07999	1.66316	2.01735	0.767465	2.73009	1.59637	2.20101	6.2798	2.07264	0.738095	1.4818	2.11118	1.55345	2.88848	5.35961
1.76_316.08		C13H16O9	316.079	316.08	-0.6	1.76	30	15	15	0	3.09283	7.5547	2.65458	3.62732	4.31288	3.7471	9.43777	5.69651	5.47898	8.61919	7.16111	5.59398	8.7289	10.9227	7.12485	2.86566	6.30204	6.01391	1.8006	3.84164	2.81272	6.92058	4.59926	1.7799	1.65006	4.45034	4.10049	5.11445	10.2953	11.8814
2.69_316.094				316.094		2.69	30	15	15	0	0.549209	0.454394	0.51206	0.449653	0.603128	0.291664	0.715837	0.526704	0.488954	0.315767	0.541421	0.267287	0.277902	0.31373	0.353619	0.276965	0.319216	0.346592	0.266372	0.505402	0.268341	0.308233	0.148777	0.396119	0.148965	0.142021	0.170965	0.119672	0.117664	0.162724
1.97_316.115		C14H20O8	316.116	316.115	0.8	1.97	30	15	15	0	0.535466	0.552264	0.576686	0.575472	0.65041	0.505354	1.04132	0.748334	0.736285	0.949628	0.809295	0.747601	0.694677	0.584378	0.927274	0.354572	0.404879	0.386004	0.452953	0.533267	0.550373	0.46152	0.349017	0.614969	0.27506	0.354872	0.371111	0.278714	0.380588	0.607225
2.8_316.116		C14H20O8	316.116	316.116	-0.2	2.8	30	15	15	0	4.88992	2.58888	3.33648	5.51007	4.52031	3.37824	7.26528	3.39029	4.42699	4.73559	5.14205	2.55402	3.05679	3.6436	7.43622	1.75071	2.36096	1.43811	1.89731	1.45485	1.74455	0.763214	0.492459	1.06698	0.440898	0.774611	0.494347	0.451588	1.92929	1.08697
5.02_316.188				316.188		5.02	40	15	15	10	0.247713	0.323822	0.473331	0.444684	0.463901	0.308496	0.366761	1.5729	0.199829	0.267208	0.286622	0.816189	0.359443	0.408892	0.307739	0.222199	0.42823	0.377732	0.400018	0.300354	0.210613	0.249995	0.252479	0.248978	0.24397	0.251616	0.277039	0.301684	0.191373	0.144249	0.172983	0.135217	0.16594	0.422318	0.115557	0.164275	0.155378	0.14434	0.217404
5.92_316.26				316.26		5.92	40	15	15	10	0.108005	0.115544	0.146776	0.138447	0.155186	0.146513	0.209272	0.343409	0.13569	0.0982873	0.150742	0.285012	0.199885	0.244392	0.196742	0.114301	0.154844	0.115692	0.302013	0.168215	0.148725	0.131032	0.134933	0.266731	0.120465	0.129358	0.151283	0.0787188	0.110492	0.0812449	0.0870104	0.147917	0.0785979	0.137045	0.0997652	0.0763286	0.0591059	0.0719708	0.0699212
2.49_318.144				318.144		2.49	30	15	15	0	0.454067	0.379805	0.496197	0.629305	0.643221	0.39622	0.881535	0.630054	0.49798	0.574986	0.808367	0.592953	0.479587	0.469078	0.46437	0.248325	0.299312	0.344675	0.357708	0.383447	0.326599	0.372764	0.297121	0.471032	0.269124	0.291595	0.350911	0.27151	0.280554	0.485836
2.12_320.059				320.059		2.12	25	3	13	9								0.170034		0.149275	0.144539					0.0854509			0.304352	0.192294	0.131153	0.385361	0.149577	0.395734	0.47056	0.40702	0.248319	0.278529	0.198323	0.192033	0.161362	0.154336	0.203441	0.201924	0.188974	0.183552	0.0578599	0.11265
1.24_320.075				320.075		1.24	39	15	15	9	0.486421	0.29627	0.471928	0.68298	0.809604	0.42343	0.925365	0.609483	0.627392	0.501712	0.928657	0.649105	0.653059	0.593932	0.472274	0.475778	0.493949	0.576329	0.605848	0.497891	0.524195	0.283326	0.551081	0.363188	0.321366	0.287948	0.403062	0.294611	0.248485	0.318996	0.167672	0.144374	0.163073	0.142474	0.138097	0.133676	0.0368601	0.114243
1.61_320.111				320.111		1.61	30	15	15	0	1.5539	1.70588	2.20577	2.24634	2.2251	2.1847	3.45057	3.97436	4.43605	2.04892	2.02046	0.893317	1.88378	3.03969	2.16068	1.12957	1.15521	4.31016	0.926898	2.15342	1.60436	1.51183	2.90514	2.80028	1.16438	1.32456	4.19992	1.41841	2.10291	2.19246
3.34_320.146				320.146		3.34	30	15	15	0	0.27285	0.12724	0.207962	0.303695	0.302818	0.1787	0.204132	0.700874	0.193701	0.198429	0.33798	0.225887	0.219988	0.143531	0.227032	0.104361	0.167583	0.105937	0.202139	0.155403	0.155314	0.116807	0.0918502	0.230518	0.0713732	0.076477	0.14922	0.0741953	0.098112	0.127696
2.99_320.147				320.147		2.99	27	14	13	0	0.215938	0.441201	0.249153	0.790072	0.403715	0.572276	0.5691	0.976029	0.636448	1.04827	1.065	0.811734		0.211996	0.902359	0.171244	0.12247	0.208949	0.626117	0.268794	0.219142	0.354016	0.0982178	0.532462	0.44231	0.223978	0.333128			0.309672
3.6_320.22				320.22		3.6	25	15	10	0	0.899899	0.337268	0.26151	0.978936	0.915686	0.53228	1.45717	0.820193	1.0383	1.02843	1.71934	1.49556	1.53909	1.27467	1.26374	0.188771	0.276935	0.274956	0.495065	0.187683	0.242756	0.12788		0.264295	0.119173			0.117863
1.49_320.955				320.955		1.49	30	15	15	0	0.542644	0.37898	0.432835	0.55323	0.802539	0.322054	0.740128	0.442229	0.47547	0.318979	0.312363	0.393832	0.432186	0.554361	0.349411	0.260749	0.563426	0.510952	0.510651	0.611068	0.485123	0.28522	0.268112	0.35747	0.389294	0.0758204	0.392891	0.288556	0.258015	0.231173
2.14_322.036				322.036		2.14	30	15	15	0	0.567279	0.735052	1.1731	0.7624	0.734809	0.684839	1.60557	1.61321	1.40786	1.63589	0.873958	0.685767	0.635362	0.73198	0.397503	0.565185	0.467144	0.385931	0.404747	0.814566	0.639338	0.635374	1.01102	1.15782	0.410979	0.548078	0.644034	0.272707	0.443584	0.57991
2.62_322.048				322.048		2.62	24	0	15	9																0.186598	0.126993	0.085861	0.656207	0.284026	0.288729	0.600357	0.566522	0.781424	0.605208	0.431219	0.424564	0.444972	0.342117	0.378847	0.257929	0.21493	0.229145	0.261064	0.813525	0.849974	0.711193	0.622607
1.58_322.061				322.061		1.58	38	14	15	9	0.264799		0.168139	0.200559	0.184861	0.0893508	0.40132	0.222224	0.197846	0.183186	0.303843	0.171219	0.140452	0.197902	0.272203	0.245329	0.192871	0.14655	0.463107	0.282409	0.252012	0.256024	0.325278	0.273061	0.324251	0.207702	0.298914	0.228624	0.13821	0.28116	0.0867825	0.184969	0.196479	0.176113	0.542998	0.440108	0.300375	0.796395
3.76_322.069				322.069		3.76	40	15	15	10	1.57736	2.24158	2.78123	2.77154	2.23098	2.22751	1.58639	1.52693	0.91148	1.16242	1.85903	4.1358	3.04418	3.31203	2.87681	2.14064	2.43607	2.24131	3.57192	3.01956	1.91137	1.18188	1.61196	1.98691	1.96189	1.63947	1.77401	2.18053	1.7608	1.16921	1.43886	1.67143	1.24391	3.13289	1.57174	1.52051	1.65871	1.63405	2.05817
2.12_322.08				322.08		2.12	32	15	14	3	0.196722	0.561192	0.579662	0.328855	0.365143	0.514205	1.04462	1.28887	1.91629	0.97567	0.31114	0.139345	0.169355	0.491035	0.283049	0.140061	0.136252	0.148519		0.806126	0.385407	0.449041	1.9538	1.79217	0.318372	0.709868	0.854771	0.259946	0.54804	0.459814	0.035845	0.0336806	0.0304465
0.5_322.084				322.084		0.5	37	15	15	7	2.67776	0.848506	0.255658	4.37503	3.74939	2.21183	2.52377	3.53615	2.04212	2.22657	4.10213	5.2317	4.49862	0.316297	2.49633	1.78093	2.4548	1.9612	2.4885	2.4944	1.14548	0.983623	2.4406	1.11241	2.02463	2.20783	3.57793	2.44043	2.02075	1.9869	0.15404	0.193105	0.0723165	0.262069				0.0486925	0.0318764
0.5_322.088				322.088		0.5	37	15	15	7	2.71091	1.60327	1.8211	4.39521	3.7489	2.27853	2.76632	3.58097	2.11058	2.41098	4.07285	5.38266	4.59222	2.39981	3.1286	1.82674	2.52799	1.94404	2.41999	2.46623	1.95028	1.79227	2.46821	1.11412	1.96007	2.20514	3.65188	2.51548	2.04167	2.00069	0.0213652	0.179764	0.0967435	0.157576				0.0411442	0.0648308
1.68_322.125				322.125		1.68	39	15	14	10	0.190099	0.397354	0.487754	0.237563	0.676503	0.41041	0.597714	0.650176	0.259476	0.148705	0.541958	0.357254	0.292034	0.387631	0.166231	0.266499	0.346611	0.119577		0.50192	0.37869	0.324287	0.651375	0.379054	0.306835	0.32553	0.228251	0.221487	0.290386	0.584064	0.066894	0.0730775	0.089616	0.123931	0.132758	0.123358	0.149938	0.129959	0.0649644
2.34_322.126				322.126		2.34	30	15	15	0	0.301	0.183894	0.152936	0.305445	0.422162	0.215509	0.434107	0.338315	0.349635	0.354667	0.413205	0.368759	0.282821	0.271605	0.265727	0.20468	0.212925	0.14881	0.215342	0.226996	0.196453	0.112467	0.143098	0.168518	0.0841001	0.118635	0.136636	0.0916114	0.142987	0.208796
1.89_322.126				322.126		1.89	29	15	14	0	0.0932954	0.152408	0.143052	0.375142	0.207273	0.210508	0.392797	0.675474	0.698025	0.339894	0.307561	0.118724	0.366044	0.337796	0.468586	0.0944241	0.0548959	0.167248		0.124646	0.130824	0.0944668	0.610094	0.366235	0.063389	0.182544	0.180929	0.110823	0.213375	0.274597
3.39_322.161				322.161		3.39	17	13	4	0	0.116408	0.0783995	0.365808	0.16099		0.0735828	0.234604	0.638034	0.134958	0.38405	0.228559	0.130929	0.148189	0.138161			0.121778	0.0871536		0.087631	0.307491
3.24_322.162		C14H26O8	322.163	322.162	0.77	3.24	30	15	15	0	0.573682	0.28444	0.465851	0.564233	0.67388	0.296799	0.81839	0.751033	0.63136	0.73085	0.882678	0.329532	0.566119	0.416813	0.478522	0.617885	0.491947	0.371641	1.10076	1.25969	0.306079	1.35134	1.2843	1.58997	2.44372	2.10159	1.762	2.21735	1.08106	2.7555
3.15_322.162		C14H26O8	322.163	322.162	0.77	3.15	30	15	15	0	0.938292	0.612327	0.57718	1.31455	1.11802	0.663867	1.62853	1.27149	1.21612	1.74719	1.89447	1.4243	1.51333	0.987085	0.85023	1.16987	1.26566	0.795617	2.65296	1.64864	0.71281	0.91435	0.709199	2.08986	2.616	2.21694	0.968239	2.61134	2.42037	3.10441
3.06_322.163		C14H26O8	322.163	322.163	-0.23	3.06	30	15	15	0	0.262816	0.0827506	0.739736	0.142548	0.346657	0.355728	0.552617	0.688785	0.112842	0.606602	0.760443	0.532392	0.135958	0.128412	0.101802	2.40693	1.82242	1.13804	2.88823	3.38314	2.35	3.36024	3.9748	4.84967	8.53837	5.15346	3.31884	6.09362	5.43107	7.5655
6.26_322.181				322.181		6.26	40	15	15	10	0.163236	0.197605	0.465407	0.287176	0.215695	0.289914	0.319073	1.49115	0.140035	0.205005	0.246633	0.310695	0.364028	0.408373	0.325211	0.271191	0.276662	0.226113	0.44225	0.215067	0.297348	0.237004	0.294656	0.372031	0.189797	0.387261	0.320591	0.401235	0.254181	0.260521	0.21106	0.159341	0.295045	0.311196	0.419544	0.377388	0.627878	0.459043	0.458385
3.06_323.1				323.1		3.06	30	15	15	0	0.256971	0.201203	0.152796	0.455276	0.3455	0.364229	0.629481	0.473824	0.42891	0.732097	0.831874	0.816674	0.836272	0.652016	0.587589	0.221178	0.278451	0.251358	0.601391	0.494794	0.42819	1.15748	0.784001	1.47028	1.60698	2.23076	1.34115	1.97995	1.43297	1.11312
5.8_323.171				323.171		5.8	40	15	15	10	0.100563	0.978587	0.254642	0.519558	0.170667	0.981054	0.798472	0.801677	0.378919	0.730098	0.489554	2.64425	0.224986	1.50407	0.244349	1.15112	0.228576	0.797474	0.322488	0.376545	0.216265	0.208099	0.3964	1.50417	0.652156	0.575847	0.607822	0.549115	0.488234	0.545948	0.45597	0.155216	0.452814	0.135227	0.328673	0.605687	0.514058	0.481074	0.505654
3.76_324.021				324.021		3.76	40	15	15	10	0.493861	0.82221	0.882492	1.04087	0.806475	0.771651	0.753009	0.565238	0.117866	0.503215	0.714303	0.725759	0.944448	1.27238	1.04904	0.705334	0.881225	0.686137	1.11293	0.624836	0.598402	0.373893	0.568973	0.621593	0.413906	0.175779	0.575647	0.710993	0.167856	0.37924	0.247657	0.385336	0.299466	0.897845	0.343589	0.449449	0.301537	0.29692	0.650915
0.55_324.036				324.036		0.55	40	15	15	10	6.08527	2.44706	3.77438	3.89289	2.9039	3.43233	1.46299	2.35379	1.85529	2.38999	2.93617	2.15161	3.01245	4.45513	3.1341	8.52942	8.12686	5.30661	11.8706	10.4788	7.97689	3.71241	5.20166	5.28543	4.59436	3.07086	3.64351	2.02785	2.6878	1.67022	4.98564	4.97425	2.96424	3.77985	7.20498	4.98693	2.4125	6.07519	0.986566
1.67_324.062				324.062		1.67	29	15	14	0	0.295907	0.343291	0.401958	0.202999	0.207668	0.26114	0.303161	0.360844	0.255273	0.21694	0.300533	0.158322	0.236234	0.3294	0.414478	0.294754	0.195226	0.350394	0.1522	0.312369	0.183039	0.209024	0.168548	0.215911	0.138506	0.063819	0.152355	0.12634		0.113225
1.09_324.064				324.064		1.09	30	15	15	0	7.29348	9.64891	11.3019	19.2414	14.5608	9.30788	13.6159	11.4486	7.33753	9.88863	13.3052	13.8577	14.5277	8.83625	7.67209	6.57757	8.29872	6.12363	15.6488	8.55677	7.00589	3.53827	6.23568	6.98056	7.6126	5.54805	7.49318	8.02157	6.0213	3.1961
0.56_324.104				324.104		0.56	39	15	14	10	0.68291	0.418536	0.41076	1.50117	0.569563	0.591639	0.533141	1.44483	0.979711	1.1514	1.458	0.74962	1.31415	1.06971	0.842815	0.326819	0.492809	1.33053	2.48779	0.643405	0.450097	0.748408	0.582151	1.32231	0.846277	0.526714	1.40319	0.449069	0.243007		0.22823	0.466581	0.331321	0.260011	0.136933	0.0791901	0.0660124	0.105771	0.127536
1.33_324.106				324.106		1.33	30	15	15	0	0.591643	0.411593	2.36376	0.379171	0.7578	0.280949	0.961433	0.604945	0.674755	0.812289	0.769338	4.19656	5.04134	5.43408	6.26326	0.264976	0.226468	0.27794	0.4425	0.361223	0.387722	0.358775	0.38026	0.438532	0.266873	0.247399	0.401535	0.202237	0.233609	0.139738
3.28_324.142		C13H24O9	324.142	324.142	0.03	3.28	30	15	15	0	0.66929	0.453109	0.258773	0.855374	0.850318	0.625548	1.40285	0.875414	0.751723	1.51004	1.81733	0.903607	1.03783	0.862207	1.23136	7.1773	10.3268	4.49246	16.4825	11.0145	8.00724	9.16149	7.90522	14.0611	11.0144	12.804	8.84991	12.1146	7.94945	9.78654
2.76_324.142		C13H24O9	324.142	324.142	0.03	2.76	30	15	15	0	12.5963	7.18486	7.14041	13.3486	17.3379	9.36684	19.6532	14.2301	13.5064	17.5568	19.0132	11.0715	11.1409	10.7432	12.1312	5.58569	8.28127	6.01004	11.0131	7.72359	8.03119	6.99786	5.92527	10.0342	6.75745	6.21992	6.02854	4.53236	6.20465	7.7814
2.14_324.142		C13H24O9	324.142	324.142	0.03	2.14	30	15	15	0	0.591697	0.378879	0.335813	0.784712	0.781735	0.50715	6.17292	8.70881	0.703221	6.23517	5.44308	0.642702	5.70508	0.743041	1.09749	1.782	1.66966	0.945178	1.18981	2.87862	2.43534	2.01571	8.24572	4.94002	0.371911	3.74553	4.51368	0.158723	5.07655	0.606377
1.73_324.142		C13H24O9	324.142	324.142	0.03	1.73	30	15	15	0	0.627523	0.575138	0.568041	0.644491	0.593694	0.539088	1.06553	0.948642	0.967083	1.4585	1.20691	0.662924	0.450163	0.784297	0.805005	0.686993	0.357275	0.93411	0.293973	0.578999	0.505018	0.466465	0.477923	0.39207	0.285935	0.39499	0.679692	0.35271	0.323264	0.874081
6.18_324.23				324.23		6.18	25	0	15	10																0.726153	0.557139	0.263152	0.999013	0.729138	0.487306	0.787223	0.57007	1.5718	0.643403	1.00671	0.449652	0.629222	0.311624	0.682485	2.65873	2.3286	2.19819	1.5284	4.23214	4.23633	4.92652	4.44279	1.05964
2.61_326.056				326.056		2.61	30	15	15	0	1.17954	0.874759	1.57483	0.982614	0.757982	1.12889	1.93064	1.44221	1.13177	1.29302	1.10679	0.589436	0.733158	0.940174	1.05466	0.593916	0.452368	0.59032	0.334167	0.934105	0.579225	0.983275	0.650269	1.14336	0.509308	0.732236	0.994092	0.417221	1.00555	1.13947
1.67_326.076				326.076		1.67	30	15	15	0	0.806513	1.14734	1.3096	0.987287	1.14822	0.78898	1.28151	1.1388	0.917832	0.861728	1.1448	0.913056	0.906142	1.4121	0.871747	1.04042	0.743531	1.31943	1.0696	1.7324	0.755498	0.424699	0.753153	0.813658	0.901945	0.73219	0.830331	0.699069	0.660595	0.350445
1.64_326.077				326.077		1.64	30	15	15	0	0.31278	1.24787	1.3096	0.464046	0.384076	0.357031	0.47363	0.45107	0.0949977	0.861728	0.292996	0.221702	0.370569	1.4032	0.409526	1.04042	0.402895	1.32362	0.488271	1.7324	0.359308	0.161822	0.74664	0.239542	0.901945	0.73792	0.850172	0.699069	0.0486314	0.217333
0.52_326.084				326.084		0.52	40	15	15	10	0.492968	0.459236	0.483311	0.951848	0.0644101	0.758777	1.10911	0.536717	0.739171	1.15961	0.273003	0.886079	0.923901	0.651961	0.706923	0.466486	0.369315	0.435075	0.40897	0.588044	0.176672	0.292305	0.668053	0.757985	0.897296	0.698902	0.875603	0.716561	0.295624	0.675558	0.931165	0.51464	0.799431	0.186269	0.229939	0.345752	0.453413	0.500324	0.214796
1.52_326.119				326.119		1.52	40	15	15	10	0.532946	0.371889	0.416927	0.773575	0.577096	0.488705	0.844425	0.63231	0.729501	0.671335	0.783077	0.897144	0.611299	0.70929	0.685742	0.935026	0.639645	0.57146	0.969938	1.14414	0.976764	1.33922	1.10181	1.25095	1.15962	0.917511	1.07232	0.893494	0.698354	0.958133	1.27911	0.898546	3.19541	1.66109	3.36539	2.72405	1.32525	3.69109	0.316758
1.29_326.121		C12H22O10	326.121	326.121	0.3	1.29	30	15	15	0	2.47144	2.06718	1.93043	2.98465	2.82429	2.09707	3.48132	2.86154	2.62143	2.80519	4.23231	3.33951	3.14452	3.08123	2.86991	1.40622	1.81247	1.50893	1.64909	2.40546	1.87295	1.21166	1.65613	1.86901	1.20174	1.29005	1.45277	1.15141	1.27166	1.14452
1.19_326.121		C12H22O10	326.121	326.121	0.3	1.19	30	15	15	0	0.726233	0.559696	0.402393	0.711841	0.720837	0.599122	0.903652	0.736707	0.663309	0.705428	1.13173	0.836722	0.773185	0.785132	0.674361	0.375786	0.523833	0.378411	0.421628	0.615287	0.461445	0.366051	0.367095	0.520365	0.403505	0.420779	0.444985	0.353665	0.285798	0.36454
0.83_326.121		C12H22O10	326.121	326.121	0.3	0.83	30	15	15	0	1.37947	1.20288	1.10322	0.954197	1.87681	1.44243	2.17494	2.22424	1.64019	2.4286	2.71301	2.60992	1.1648	2.18519	0.6954	0.590096	0.88949	1.22575	1.30007	1.21868	1.0912	1.52161	1.27147	1.11113	0.862869	1.26133	1.21106	1.01078	0.774359	0.617295
3.09_326.156				326.156		3.09	30	15	15	0	1.98609	0.992971	0.449175	2.90012	2.8776	2.2985	5.96963	2.72842	5.10079	9.03752	7.05138	5.90119	4.79515	4.09733	5.85258	0.804972	1.21703	0.771854	1.34621	0.986269	0.894789	0.48221	0.39524	0.960295	0.400437	0.366858	0.23818	0.192923	0.126856	0.316038
1.97_326.157				326.157		1.97	30	15	15	0	0.45111	0.303054	0.22798	0.506386	0.484145	0.334969	0.575243	0.43132	0.394092	0.687478	0.663146	0.487572	0.464323	0.368884	0.315484	0.234888	0.285311	0.224524	0.558859	0.376331	0.312117	0.213204	0.177405	0.390211	0.284326	0.191057	0.224708	0.134564	0.184703	0.12509
2.58_326.158				326.158		2.58	15	0	15	0																0.590579	0.900951	0.425286	4.04186	2.58096	1.66255	3.12165	4.30782	6.24484	4.36127	4.62037	3.43124	7.11633	3.74568	4.61024
5.24_326.195				326.195		5.24	33	13	13	7	0.358858	0.260678	0.2792	0.362345	0.233952	0.202779	0.249745	0.303897		0.227308	0.264322	0.399604	0.298291	0.388773		0.244609			0.818076	0.262336	0.402679	0.515464	0.628033	0.785544	0.737018	0.381069	0.384028	0.343888	0.317013	0.214175	0.0580287	0.149588	0.107095		0.26249	0.109003	0.331204	0.292161
5.17_326.201				326.201		5.17	27	7	15	5	0.241821			0.241408	0.120315			0.231165	0.129748	0.144641		0.312781				0.42493	0.517801	0.281984	1.04241	0.544922	0.360534	0.559823	0.434042	0.89491	0.789753	0.921439	0.432106	0.348759	0.275444	0.336677			0.12131		0.356776	0.453327	0.234404	0.257481
1.65_326.965				326.965		1.65	30	15	15	0	0.313155	0.234592	0.220329	0.524077	0.491002	0.328237	0.68977	0.490617	0.331362	0.297596	0.619935	0.54889	0.567561	0.504467	0.532623	0.242023	0.377049	0.310389	0.460834	0.355828	0.238093	0.194426	0.214076	0.308666	0.259553	0.208738	0.273918	0.17818	0.191988	0.179148
0.73_327.948				327.948		0.73	36	15	15	6	0.837553	0.554754	0.714312	0.75611	0.724016	0.557899	0.952389	0.502962	0.488501	0.486578	0.546591	0.457148	0.572551	0.592012	0.677073	0.510458	0.541926	0.379718	0.367936	0.404656	0.300626	0.17902	0.266541	0.192412	0.263603	0.245125	0.253397	0.265433	0.344535	0.183836	0.152396	0.254777	0.102289		0.0880935	0.107289		0.0748201
2.61_328.047				328.047		2.61	30	15	15	0	0.501884	0.357644	0.691345	0.399664	0.366208	0.431178	0.736836	0.619494	0.498093	0.509548	0.475518	0.251684	0.373178	0.48646	0.405472	0.245404	0.210957	0.279094	0.130677	0.378518	0.239193	0.357113	0.266979	0.412838	0.184571	0.272402	0.366158	0.167155	0.347796	0.39296
3.76_328.066				328.066		3.76	40	15	15	10	0.18002	0.256445	0.364499	0.356522	0.315644	0.327643	0.209959	0.230428	0.119453	0.163903	0.25586	0.521514	0.387485	0.437726	0.455798	0.242404	0.283616	0.271702	0.471328	0.370429	0.250644	0.131166	0.210973	0.219817	0.228944	0.184926	0.18779	0.252894	0.206409	0.147402	0.146193	0.158678	0.121755	0.366724	0.186349	0.16197	0.192723	0.182048	0.270047
1.67_328.075				328.075		1.67	13	7	6	0	0.360427	0.389553	0.377027	0.211847	0.348228	0.276711		0.394908								0.374239	0.367168	0.457985	0.337684	0.658246	0.255574
3.13_328.08				328.08		3.13	22	11	11	0	0.125443					0.202768	0.407097	0.217228	0.215327	0.398255	0.459386	0.389275	0.778401	0.470175	1.07728		0.0754995		0.147868	0.137687		0.147193		0.133643	0.216958	0.179005	0.232677	0.226908	0.158345	0.17547
2.91_328.08				328.08		2.91	29	14	15	0	0.148733	0.103963		0.13292	0.427382	0.334231	0.822366	0.406087	0.443643	0.874053	0.937982	0.785089	1.1784	0.75175	1.50174	0.135645	0.0889915	0.161788	0.216978	0.129213	0.211667	0.335312	0.282007	0.335499	0.403579	0.340784	0.450154	0.434336	0.236248	0.360362
2.83_328.08				328.08		2.83	29	14	15	0	0.275855	0.104017		0.148369	0.296895	0.268996	0.518878	0.258316	0.330998	0.544385	0.679406	0.666326	0.895523	0.445594	0.786861	0.126243	0.176158	0.171514	0.214376	0.126586	0.17368	0.291292	0.276229	0.292848	0.344631	0.284814	0.390582	0.352522	0.251527	0.215654
2.31_328.08				328.08		2.31	26	12	14	0	0.29666	0.119732		0.270444	0.322224	0.284094	0.568804		0.340729	0.521809	0.626681	0.670417	0.882101		0.860671	0.0990585	0.168865	0.192353	0.227747	0.137633		0.237819	0.17223	0.434428	0.317316	0.215536	0.340754	0.312171	0.193102	0.195546
3.1_328.11				328.11		3.1	30	15	15	0	0.296915	0.26777	0.481108	0.670048	0.638648	0.498883	0.73412	0.92194	0.622777	1.12494	1.02974	0.773453	0.841872	0.82541	0.77654	0.387339	0.224647	0.253422	0.384101	0.2145	0.391811	0.408546	0.508655	0.682721	0.353021	0.179141	0.750702	0.328109	0.222255	0.172476
2.22_328.114				328.114		2.22	30	15	15	0	0.14079	0.357022	0.203914	0.136972	0.205036	0.183106	0.604467	0.113882	0.291433	0.232131	0.130423	0.138004	0.193109	0.294736	0.311596	0.213813	0.125612	0.387072	0.12001	0.305135	0.213965	0.0830652	0.131169	0.280448	0.0672329	0.239514	0.0804493	0.0592921	0.139832	0.129109
4.33_328.225				328.225		4.33	23	0	15	8																0.120771	0.0827456	0.0719359	0.34513	0.202753	0.195584	0.430166	0.296892	0.594895	0.316155	0.31713	0.124167	0.129093	0.0919641	0.0597972	0.266227	0.205623	0.314111	0.115118	0.417086	0.31875	0.0829485	0.0880394
2.45_328.959				328.959		2.45	30	15	15	0	0.257972	0.233102	0.231912	0.418011	0.252937	0.235082	0.230648	0.259875	0.177446	0.171036	0.239434	0.321498	0.35297	0.360486	0.274152	0.270563	0.344039	0.241993	0.44106	0.271725	0.232003	0.163722	0.204472	0.285336	0.304366	0.220266	0.245071	0.255364	0.173483	0.129733
3.25_330.131		C15H22O8	330.131	330.131	0.47	3.25	30	15	15	0	2.64965	1.23956	1.32847	2.336	1.76054	1.53911	2.2172	0.94534	0.941398	0.954328	0.95883	0.711698	1.08067	1.33696	1.84532	0.655899	0.852526	0.634529	0.670796	0.408806	0.49715	0.233114	0.199674	0.49523	0.252339	0.305329	0.19792	0.218656	0.286175	0.243385
6.01_330.196				330.196		6.01	25	14	11	0	0.517006	0.411664	0.320415	0.362469	0.309937	0.308983	0.385557	0.285222	0.304358	0.297601	0.171656	0.137204		0.192147	0.199698	0.339127	0.359361	0.19139	0.219786	0.570594	0.199789	0.0890641		0.292533	0.106485		0.0701315		0.075573
5.14_330.24				330.24		5.14	30	15	15	0	0.1248	0.071251	0.34757	0.167759	0.222779	0.0734088	0.547134	0.0948872	0.0972609	0.423724	0.24674	0.583391	0.117438	0.133126	0.23358	0.204661	0.288488	0.115149	0.548989	0.424755	0.265084	0.259246	0.255795	0.350435	0.335187	0.354542	0.0913512	0.140472	0.201746	0.163872
4.75_330.24				330.24		4.75	40	15	15	10	0.67453	0.854215	0.971721	0.710214	0.684415	0.72116	1.30328	2.54054	0.506097	1.95205	2.21588	0.851395	0.799762	0.84281	1.22514	2.12653	1.64365	0.909357	4.38623	4.14047	2.44508	2.47392	1.88235	3.48604	2.21926	4.32735	1.23042	0.992849	1.14192	0.907853	1.69486	1.83513	2.05941	0.662279	2.2602	2.00639	0.960125	1.81166	0.162617
0.88_331.054				331.054		0.88	30	15	15	0	9.34745	6.76686	8.8176	7.7932	7.89818	9.53677	11.1546	3.99865	3.83016	5.23419	5.98695	5.23886	4.96709	6.62893	8.31055	3.1192	4.93207	3.83656	1.642	2.48038	2.63831	0.43074	1.60456	0.532516	0.754076	0.563711	1.9894	0.990947	2.56999	1.45395
1.2_331.127				331.127		1.2	30	15	15	0	5.28894	4.33592	4.44048	7.26132	5.71398	5.85684	6.43334	4.82675	4.53706	5.7057	6.40618	7.60646	6.06057	5.28569	5.19668	3.3488	4.05146	4.8129	5.12925	3.58522	3.84716	3.25878	4.87529	5.50841	3.62786	3.69095	4.96333	4.17348	4.04898	5.70098
4.77_331.987				331.987		4.77	40	15	15	10	0.275422	0.332729	0.343202	0.372087	0.345764	0.275319	0.496114	0.3483	0.2073	0.40122	0.46602	0.421612	0.364984	0.479713	0.442815	0.276247	0.276281	0.262186	0.519615	0.435037	0.252524	0.161866	0.261841	0.389022	0.3298	0.1991	0.296291	0.283577	0.217061	0.196695	0.209329	0.23961	0.208024	0.413602	0.202761	0.194278	0.205242	0.193597	0.220588
2.35_332.111				332.111		2.35	29	15	14	0	0.367436	0.209252	0.150787	0.381631	0.547135	0.285579	0.69177	0.612723	0.51384	0.508698	0.904004	0.560497	0.632298	0.421253	0.468437	0.195377	0.311011	0.163068	0.417505	0.257887	0.218873	0.198683	0.123937	0.37666	0.241837	0.19546	0.159201	0.110703	0.261294
1.93_332.111				332.111		1.93	30	15	15	0	0.716693	16.6403	18.2843	1.03867	1.22281	0.566984	1.59597	1.25662	0.926681	1.33731	1.42988	1.16485	1.17694	1.019	1.02256	0.446956	10.9008	13.397	0.8234	17.3843	0.545141	13.4893	12.5144	15.8366	10.167	12.1319	15.246	9.49738	10.2507	13.4917
1.84_332.111				332.111		1.84	30	15	15	0	12.9031	16.9197	18.5987	17.3482	14.8143	14.1388	28.8364	19.0426	18.5458	21.5254	20.0699	18.2135	14.8061	16.0185	12.0067	9.81123	10.4228	13.5555	12.3339	17.7575	10.6424	13.7533	12.8469	15.5991	9.83182	12.3312	15.515	9.50655	10.3298	13.8688
3.68_333.994				333.994		3.68	36	15	15	6	0.146677	0.154928	0.155127	0.237244	0.156389	0.144719	0.112591	0.214479	0.0924541	0.0890449	0.105794	0.118664	0.19995	0.228063	0.224138	0.307025	0.197542	0.201129	0.348461	0.181723	0.190997	0.153833	0.160651	0.124607	0.177621	0.158217	0.162227	0.160323	0.13024	0.121387	0.0564851		0.060346		0.321962	0.36458	0.218108	0.300796
2.12_334.048				334.048		2.12	40	15	15	10	0.238255	0.23462	0.645827	0.234229	0.283368	0.387187	0.512303	0.901362	0.555687	0.762057	0.654731	0.274038	0.277037	0.285117	0.436134	0.385958	0.31963	0.30635	1.20033	1.05585	0.627493	1.18904	0.912684	1.78819	1.57184	1.42656	1.16346	0.979083	1.02648	0.892663	0.539806	0.546648	0.630965	0.808305	0.614288	0.622669	0.262919	0.44776	0.0672964
1.65_334.09				334.09		1.65	30	15	15	0	8.88763	6.17276	5.73416	9.29885	10.9709	6.8592	14.9068	8.60595	7.05681	8.73543	12.3457	7.71433	10.0661	10.3754	13.4079	4.41798	6.41387	5.66918	6.20313	6.17425	5.21109	2.81774	2.74432	5.32016	2.61035	2.27109	2.62615	1.99355	1.55566	2.25899
5.96_334.143				334.143		5.96	40	15	15	10	3.53722	1.40073	10.6225	2.05039	1.86114	5.26952	3.29188	4.35651	1.96597	4.54347	10.5997	4.45922	4.39391	1.32543	3.42506	1.28588	1.27363	2.51919	2.98169	4.03118	3.32658	1.8223	1.55774	2.75068	0.88741	0.920018	2.99288	7.48236	0.88296	1.92043	2.4058	1.72865	1.57963	2.86997	0.218246	0.174518	0.283194	0.211322	0.349362
3.78_334.164				334.164		3.78	30	15	15	0	0.109259	0.290563	0.277296	0.511192	0.368742	0.215902	0.504403	0.304702	0.300854	0.324427	0.46404	0.30367	0.341975	0.274679	0.2115	0.14685	0.183419	0.172592	0.236875	0.264611	0.11123	0.193121	0.133518	0.200531	0.119606	0.100685	0.116585	0.0790999	0.125534	0.0778655
3.55_334.198				334.198		3.55	30	15	15	0	0.506869	0.234977	0.284532	0.805487	0.867195	0.422542	1.21659	0.692296	0.818924	1.05811	1.32148	1.44188	1.20157	0.866657	0.877644	0.178357	0.159663	0.118298	0.347388	0.174942	0.184266	0.174496	0.113716	0.189974	0.123627	0.104851	0.136339	0.225488	0.0878518	0.0932935	0.0549574	0.086722	0.0452872					0.0473748
6.21_334.213				334.213		6.21	16	3	3	10	0.0933973													0.157722	0.095189					0.147062				0.268201	0.147499						0.842933	0.682636	0.772736	0.15277	0.546977	0.538837	0.276332	0.47059	0.0701649
1.91_334.97				334.97		1.91	30	15	15	0	0.33482	0.287922	0.338932	0.276012	0.396521	0.170507	0.389692	0.272775	0.26698	0.179442	0.176184	0.176205	0.214195	0.323556	0.236844	0.113511	0.26396	0.257499	0.205796	0.342557	0.220811	0.195439	0.163487	0.237663	0.168402	0.065801	0.178961	0.113972	0.104644	0.115179
1.65_336.106				336.106		1.65	35	15	15	5	59.9852	44.2955	40.4985	77.3551	96.8809	52.8242	97.9171	67.5197	53.9246	53.9028	98.5419	73.7799	70.1607	58.686	50.1342	36.0917	55.1979	47.9493	71.7202	67.2164	49.0006	26.9681	27.6131	47.1862	34.5013	30.8807	33.332	23.6679	27.519	26.8768	0.0642093	0.050184	0.0606444			0.0421904		0.289033
1.59_336.106				336.106		1.59	35	15	15	5	1.80023	1.14934	0.904883	2.07591	2.64041	1.54179	2.23598	1.6414	1.44644	1.63638	2.17968	2.08592	1.77479	1.40311	1.09239	1.18605	1.37992	1.13701	2.12594	1.59783	1.31749	0.799844	0.941037	1.38084	1.22986	1.13116	1.14547	0.733365	0.901924	0.644911	0.0610553	0.055152	0.0667293			0.0412707		0.288167
2.98_336.142				336.142		2.98	30	15	15	0	3.87958	1.38369	0.840298	2.72481	3.41621	1.86731	3.9969	2.97543	2.23418	3.51032	2.53843	1.96155	2.0272	1.40478	2.50554	0.964921	2.20752	1.69485	2.97291	1.8013	1.7857	1.29527	0.944737	2.69414	1.42223	1.0117	1.06446	0.580643	0.656626	1.06744
4.2_336.177				336.177		4.2	19	4	15	0								0.0859518	0.042377	0.207325					0.121001	0.288319	0.33946	0.154094	0.63049	0.431443	0.413185	0.414074	0.370468	0.919202	0.281708	0.279938	0.344943	0.14465	0.187696	0.292359
3.79_336.177				336.177		3.79	30	15	15	0	0.230581	0.278014	0.184685	0.447451	0.355101	0.166686	0.569035	0.473086	0.476536	0.457469	0.430729	0.374166	0.230305	0.226094	0.13408	0.0754118	0.125785	0.108905	0.351825	0.122896	0.0873489	0.427386	0.278043	0.41296	0.133752	0.194059	0.148458	0.195883	0.106969	0.28222
3.73_336.178				336.178		3.73	30	15	15	0	0.508868	0.95041	0.739364	0.876736	0.859042	0.24408	1.31513	1.31556	0.930986	0.802893	1.34478	0.478877	0.340887	0.366911	0.180248	0.275432	0.289683	0.309562	0.302952	0.769763	0.279371	0.441419	0.210148	0.398553	0.204571	0.22259	0.192528	0.173831	0.0938691	0.287026
3.51_336.178				336.178		3.51	30	15	15	0	0.53407	0.314105	0.440456	1.03864	1.04535	0.776229	0.59207	1.08799	0.955109	2.04133	1.49806	1.09861	1.04964	0.801747	1.10645	0.805762	0.72758	0.640943	1.20462	0.920337	0.785675	0.518236	0.506214	1.03595	2.12163	2.32383	1.13211	2.27398	2.39024	3.17774
5.98_336.229				336.229		5.98	21	0	11	10																0.203633	0.197179		0.429077	0.213894	0.127757	0.0985464		0.304825	0.197829	0.172268		0.165615		0.0951908	0.198516	0.19287	0.11575	0.323704	0.123399	0.233074	0.1449	0.168247	0.114405
3.76_338.032				338.032		3.76	40	15	15	10	1.4252	1.74603	2.01671	2.27608	1.92158	1.93605	1.75031	1.79219	1.00918	1.57316	2.09802	3.70911	2.73115	2.87335	2.63771	1.59456	1.84233	1.69222	2.71953	1.87074	1.40347	0.909284	1.48782	1.92386	1.52812	1.39254	1.30569	1.69045	1.39966	1.02138	1.03354	1.16531	0.914765	2.02778	1.14317	0.994077	1.13459	1.14267	1.37544
1.57_338.078				338.078		1.57	33	15	15	3	0.301298	0.456618	0.427299	0.279345	0.627219	0.235144	0.44394	0.472074	0.361965	0.38917	0.763905	0.664254	0.612558	0.55142	0.672823	0.302271	0.239036	0.292087	0.472537	0.493753	0.416112	0.231979	0.409965	0.229389	0.133598	0.191045	0.423155	0.341412	0.37676	0.427179	0.0860134					0.0439358		0.0408475
0.69_338.084				338.084		0.69	34	15	15	4	2.79512	2.59364	2.46695	4.1083	4.88387	2.85327	7.50262	5.34776	4.47782	5.08627	7.22055	5.44416	3.06916	3.77478	4.25798	1.74404	2.51146	2.47882	2.78539	3.77352	2.7313	2.66826	3.20172	2.89076	2.19723	3.0154	3.05365	2.49943	2.47562	3.46093	0.0631511	0.14809	0.0729277	0.0695697
0.69_338.085				338.085		0.69	33	15	15	3	2.93448	2.69548	2.91639	3.94517	4.94099	2.57852	7.62643	5.65933	4.54449	5.18444	7.46186	5.43892	4.29567	3.44019	4.39574	2.11795	2.49303	1.93771	2.96592	3.93599	2.85897	2.61381	3.1486	3.04012	2.01366	2.81955	3.09371	2.48527	2.31067	3.25047		0.0507677	0.129703
4.83_338.115				338.115		4.83	30	15	15	0	0.425399	0.314365	0.342405	0.429961	0.344584	0.309188	0.697574	0.670108	0.415198	0.527976	0.654146	0.404731	0.330305	0.320746	0.319501	0.284639	0.333778	0.371329	0.40027	0.330863	0.255747	0.291642	0.256014	0.687	0.285443	0.197463	0.230376	0.258476	0.127509	0.151506
1.73_338.119				338.119		1.73	30	15	15	0	0.747292	0.570076	0.472557	0.726143	0.88648	0.424314	1.06013	0.734538	0.731063	1.03741	0.915258	0.421276	0.410203	0.615457	0.700007	0.452516	0.362062	0.549014	0.565219	0.69867	0.394121	0.43122	0.391783	0.701747	0.325967	0.372523	0.377784	0.289212	0.333352	0.482165
1.59_338.12				338.12		1.59	30	15	15	0	0.594067	0.584109	0.468182	0.729855	0.904219	0.51449	0.644765	0.696052	0.661212	0.518419	1.1191	0.669476	0.182356	0.629561	0.442846	0.474232	0.167079	0.611981	0.536255	0.637289	0.340971	0.443067	0.390237	0.725082	0.372643	0.406361	0.431553	0.375084	0.369072	0.317382
3.74_338.156				338.156		3.74	15	0	15	0																0.289503	0.396797	0.192795	0.64185	0.417195	0.380716	1.33628	0.758989	0.946385	1.40358	1.9695	0.980793	1.32066	1.32496	1.12105
3.22_338.156				338.156		3.22	30	15	15	0	0.825494	0.642581	0.607723	0.913702	0.303655	0.691749	1.30642	1.15635	1.09528	1.37766	1.213	0.624734	0.653981	0.787176	0.951895	0.294553	0.441532	0.239885	0.4187	0.441125	0.28891	0.141196	0.404376	0.25246	0.414352	0.129967	0.311155	0.284987	0.53016	0.751556
2.44_338.157				338.157		2.44	30	15	15	0	0.278719	0.187893	0.217255	0.410689	0.348665	0.288381	0.612017	0.31211	0.507297	0.611459	0.631965	0.382657	0.533174	0.443935	0.487314	0.149519	0.168667	0.278573	0.28283	0.228821	0.211115	0.183797	0.215912	0.446186	0.222865	0.226232	0.21222	0.208543	0.250194	0.451428
4.44_338.193				338.193		4.44	30	15	15	0	1.29107	1.03068	0.280622	0.105406	0.107424	0.531471	0.540198	0.0673689	0.0339269	0.219239	0.311147	0.251296	1.52571	0.753054	0.269707	0.50584	0.617622	0.26419	0.319847	0.212027	0.26156	0.196435	0.131548	0.660784	0.300015	0.414578	0.370006	0.35185	0.293574	0.522668
4.38_338.193				338.193		4.38	30	15	15	0	3.82182	1.49162	3.01369	1.22152	1.07149	0.335515	4.27376	0.683691	1.18365	1.10567	1.99352	0.768731	1.53015	0.673292	1.43668	0.362963	1.0187	0.255386	0.632341	0.193792	0.462106	0.214324	0.147488	0.660633	0.302505	0.26802	0.220906	0.551906	0.139245	0.625198
4.44_338.198				338.198		4.44	33	15	15	3	3.50171	0.664672	1.96598	0.941796	1.13064	0.718895	3.89593	0.839226	1.13276	1.71904	1.64998	1.28408	0.899486	0.399947	1.70236	0.504586	0.700188	0.131547	0.29846	0.197709	0.182015	0.535051	0.215313	0.215921	0.315733	0.416619	0.364433	0.34132	0.320074	0.671341	0.0317199						0.047752	0.0581511
1.84_339.095				339.095		1.84	30	15	15	0	0.491595	0.358582	0.373383	0.781254	0.665697	0.498286	1.00251	0.733602	0.531212	0.623834	0.736932	0.903761	0.624646	0.585532	0.52794	0.459078	0.665389	0.531876	1.74857	1.22078	0.934954	1.76612	1.51401	2.02646	2.16894	2.70501	2.01094	2.61852	2.22454	2.5536
2.93_339.13				339.13		2.93	30	15	15	0	0.351369	0.316204	0.292799	0.332406	0.425045	0.38345	0.521748	0.818188	0.400013	0.673141	0.5888	0.347633	0.354157	0.330883	0.424852	0.249045	0.29535	0.310473	0.314431	0.320863	0.228563	0.302795	0.255086	0.410826	0.23851	0.275506	0.340086	0.21978	0.212576	0.305626
2.12_340.027				340.027		2.12	29	15	14	0	0.194645	0.0883514	0.164188	0.277331	0.3157	0.203504	0.757526	0.394574	0.384138	0.399439	0.413422	0.393717	0.367254	0.381504	0.472928	0.0740988	0.106292		0.18904	0.0963413	0.101896	0.246872	0.169139	0.197189	0.206728	0.17788	0.133422	0.138071	0.121459	0.185886
3.76_340.032				340.032		3.76	40	15	15	10	0.374128	0.431228	0.551092	0.559863	0.489684	0.481318	0.492489	0.55526	0.273189	0.362404	0.589968	1.12868	0.7241	0.708171	0.685831	0.353799	0.431327	0.418686	0.728415	0.464702	0.350823	0.232965	0.375085	0.573209	0.396513	0.342955	0.302526	0.34354	0.350683	0.273847	0.268296	0.276146	0.253974	0.483123	0.262859	0.255696	0.263006	0.301939	0.333747
3.93_340.101				340.101		3.93	28	13	15	0	0.180466			0.233732	0.264421	0.242704	0.36539	0.226687	0.264875	0.604251	0.518057	0.484837	0.302421	0.178754	0.223402	0.134262	0.187867	0.123329	0.433583	0.273513	0.200952	0.292848	0.237445	0.62569	0.492712	0.577378	0.291814	0.399863	0.787131	0.367911
2.78_340.101				340.101		2.78	29	15	14	0	0.246477	0.141946	0.127785	0.352424	0.32923	0.184477	0.537638	0.335766	0.374209	0.569036	0.600473	0.485903	0.314837	0.47554	0.462042	0.116416	0.148923	0.0752688	0.248531	0.154504	0.186717	0.111774	0.105488	0.146859	0.140959	0.126831	0.174966		0.0953872	0.0495489
3.12_340.129				340.129		3.12	30	15	15	0	0.307148	0.302256	0.458276	0.495973	0.460195	0.352267	0.680361	0.564467	0.430021	0.448281	0.558266	0.330505	0.447006	0.634938	0.570414	0.227516	0.246524	0.218884	0.206561	0.306398	0.245335	0.211546	0.164183	0.4076	0.190127	0.219498	0.23868	0.182259	0.199045	0.201144
3.56_340.132				340.132		3.56	30	15	15	0	0.78335	0.426489	0.405504	0.727096	1.33838	0.335287	1.2271	0.924647	0.740009	0.919903	1.15084	0.527679	0.870085	0.977152	1.30536	0.29624	0.472565	0.432448	0.757504	0.574486	0.493113	0.335224	0.335973	0.876071	0.382237	0.359532	0.285853	0.308116	0.442605	0.616392
1.51_340.136				340.136		1.51	30	15	15	0	0.93627	0.616789	0.981374	1.76906	1.24492	0.582919	1.87298	2.0359	1.3691	2.30178	1.72966	1.78948	1.65948	1.14778	1.48065	0.74842	0.762779	1.14836	1.42153	1.01722	0.796794	0.934182	1.0342	0.948379	0.986335	0.54053	1.30811	0.751573	0.752715	0.906345
3.69_340.152				340.152		3.69	15	0	15	0																0.194728	0.214334	0.142951	0.432914	0.474658	0.323745	0.405019	0.470819	0.628121	0.365043	0.546469	0.575958	0.444834	0.534884	0.723194
3.53_340.172				340.172		3.53	30	15	15	0	0.482688	0.398423	0.195388	0.82951	0.818314	0.475713	1.34886	0.833345	0.710565	0.817764	1.40671	0.484614	0.813892	0.594234	0.954926	0.31117	0.266519	0.20933	0.238239	0.274762	0.2445	0.181712	0.16861	0.263038	0.254986	0.0867608	0.0557518	0.368514	0.0753105	0.143459
2.91_340.172				340.172		2.91	35	15	15	5	0.243944	0.193587	0.154777	0.4861	0.459026	0.248984	0.493517	0.450458	0.341072	0.574492	0.378817	0.420112	0.375703	0.311988	0.306423	0.167459	0.140238	0.208975	0.221655	0.270875	0.17123	0.0954384	0.160438	0.267109	0.145482	0.16427	0.0474297	0.095361	0.0999033	0.164942	0.152349	0.190989	0.102864	0.140124
3.42_340.173				340.173		3.42	30	15	15	0	0.37216	0.27757	0.163091	0.597837	0.639067	0.333916	1.29464	0.699142	0.665778	1.54318	1.38252	1.0397	1.00134	0.681548	0.913739	0.209914	0.252148	0.172619	0.443826	0.337094	0.254117	0.18382	0.144405	0.333771	0.254986	0.278351	0.222722	0.368514	0.233616	0.21945
2.8_340.173				340.173		2.8	35	15	15	5	0.414581	0.2897	0.316813	0.551738	0.571252	0.363339	0.563096	1.21162	0.480666	0.754021	0.721001	0.638524	0.562581	0.40352	0.454793	0.312867	0.271366	0.324901	0.557113	0.336755	0.278844	0.165249	0.24232	0.45957	0.380029	0.254744	0.0589181	0.061069	0.157315	0.165504	0.162906	0.194068	0.119469	0.137602
1.49_341.984				341.984		1.49	30	15	15	0	0.819546	0.37004	0.366211	0.61736	1.2108	0.429146	1.07864	0.596976	0.672597	0.510255	0.420828	0.457054	0.428008	0.604213	0.313151	0.290349	0.685529	0.646675	0.719617	0.781152	0.742874	0.495794	0.337848	0.486545	0.471302	0.0894083	0.551283	0.273544	0.318912	0.386012
3.76_342.027				342.027		3.76	40	15	15	10	0.138641	0.20585	0.22677	0.276523	0.227516	0.206972	0.192363	0.196661	0.112796	0.141928	0.22724	0.420111	0.266408	0.344405	0.329309	0.163814	0.207544	0.221078	0.279035	0.194755	0.147207	0.0936763	0.164688	0.207528	0.149532	0.149992	0.15433	0.196942	0.167518	0.0995211	0.118963	0.12036	0.0968282	0.257768	0.129325	0.119418	0.121621	0.139202	0.174156
3.61_342.076				342.076		3.61	30	15	15	0	4.82175	1.86955	4.30869	2.60875	2.40701	2.25298	5.25855	4.54321	3.25419	2.23223	3.29179	2.07708	1.78544	2.88977	1.73418	1.56473	1.59105	1.85682	1.63533	1.58274	1.5307	2.27923	1.79174	2.34607	0.869528	1.29344	2.4132	1.68387	1.05174	1.2937
3.44_342.112				342.112		3.44	30	15	15	0	0.572333	0.456811	0.491124	0.503108	0.714268	0.60121	0.632762	0.740105	0.507363	0.586456	0.64005	0.362444	0.535926	0.418925	0.417582	0.326816	0.405002	0.411074	0.528374	0.526632	0.462169	0.448627	0.347944	0.655676	0.299822	0.281599	0.384548	0.230089	0.268735	0.211017
4.2_342.144				342.144		4.2	28	13	15	0	0.0885343	0.0886253		0.152436	0.119619		0.232192	0.126923	0.0780059	0.133081	0.145201	0.115326	0.186984	0.152776	0.235018	0.345536	0.391817	0.326789	0.399164	0.325629	0.266874	0.384013	0.278711	0.515507	0.565476	0.53109	0.436711	0.722562	0.434999	0.332359
3.48_342.144				342.144		3.48	30	15	15	0	0.864106	0.54756	0.809366	0.985606	0.900281	0.825551	1.23092	1.04038	0.811106	0.893046	0.955541	0.600108	1.07588	1.63301	1.8975	0.406919	0.514665	0.471263	0.62453	0.718029	0.564256	0.432021	0.327324	1.10945	0.374622	0.367762	0.439281	0.31357	0.414043	0.391152
2.18_343.095				343.095		2.18	40	15	15	10	0.707798	0.413901	0.571658	0.650909	0.693736	0.373727	0.704637	0.512009	0.401789	0.669016	0.929472	0.518789	0.588856	0.569599	0.617272	1.24761	1.10082	0.79674	1.9965	1.24583	1.06827	1.00157	0.839224	1.5228	1.06463	0.882126	0.919271	0.577038	0.749434	0.955823	2.01533	1.90168	1.17812	1.13133	1.90653	1.90464	0.726299	1.61951	0.264518
2.81_344.11				344.11		2.81	30	15	15	0	1.16874	0.943972	0.84592	1.21143	0.858849	0.793313	1.17091	0.97723	0.922997	0.948291	1.28611	0.91705	0.577225	0.536082	0.54974	0.641056	0.536238	0.870358	0.555861	0.69842	0.455424	0.740046	0.547667	0.793645	0.369442	0.288374	0.467619	0.327555	0.180073	0.473327
3.07_344.111				344.111		3.07	30	15	15	0	0.738574	0.549201	0.390881	1.3844	1.30602	0.564007	1.43688	1.04107	0.79024	0.927789	1.54958	1.02614	1.07426	0.952095	0.851898	0.602473	0.759869	0.715143	0.895502	0.669496	0.474918	0.403535	0.353556	0.854562	0.174292	0.288391	0.214282	0.284875	0.167045	0.174134
2.22_344.111				344.111		2.22	30	15	15	0	2.41444	1.12205	0.654824	1.66388	2.76524	0.998543	2.25221	1.90906	1.65881	2.14535	2.37278	1.55601	1.44097	1.77603	1.70027	1.31249	1.68393	1.60606	1.65418	1.22778	1.21281	0.849923	0.615842	1.91329	0.537552	0.742618	0.76308	0.364374	0.510405	0.695284
1.73_344.112				344.112		1.73	29	14	15	0	0.582515		0.499553	0.50869	0.48285	0.348561	0.830412	0.474534	0.522457	0.573294	0.755939	0.531968	0.472435	0.370069	0.599316	0.24028	0.387883	0.312172	0.482617	0.38848	0.287132	0.473529	0.219065	0.623587	0.275526	0.318285	0.400901	0.308223	0.309356	0.514891
6.38_344.219				344.219		6.38	34	13	12	9	0.164269	0.175157		0.330905	0.323477	0.175174	1.68474	0.383432	0.300853	0.394664	1.05122	0.356034	0.166142		0.417972	0.0782888			0.141399		0.100444	0.0906818	0.153602	0.412165	0.248224	0.176942	0.256134	0.316754	0.186771	0.488059	0.114774	0.0635528	0.125784	0.095954	0.208878	0.212887	0.092583	0.156518
3.99_344.219				344.219		3.99	40	15	15	10	0.573206	0.855196	0.950641	0.79756	0.683859	1.13225	0.730215	1.16045	0.384004	0.768375	1.31772	0.823697	0.737388	0.990762	0.793015	0.672738	0.599683	0.581618	1.0796	0.965366	0.612763	0.311842	0.144155	0.464688	0.543439	0.550297	0.512421	0.437189	0.392178	0.321621	0.270755	0.353529	0.238201	0.56683	0.312732	0.312293	0.335539	0.364488	0.365162
5.13_344.261				344.261		5.13	40	15	15	10	0.102338	0.111045	0.133028	0.146837	0.097864	0.128821	0.152158	0.717089	0.090777	0.222007	0.187269	0.230938	0.151323	0.229546	0.248829	0.135403	0.138822	0.133151	0.325863	0.266983	0.1975	0.13195	0.327348	0.231047	0.0985742	0.24228	0.17529	0.186719	0.154022	0.10938	0.116361	0.111471	0.0725957	0.136287	0.140543	0.131651	0.0884341	0.0851711	0.105552
1.27_345.047				345.047		1.27	38	15	15	8	0.28529	0.10408	0.580541	0.208036	0.233124	0.120834	0.421778	0.207054	0.160275	0.226256	0.149848	0.17824	0.147486	0.146462	0.198434	0.179173	0.184813	0.120773	0.350133	0.217522	0.233737	0.0922685	0.170308	0.121237	0.0852545	0.0850588	0.0949715	0.065968	0.165742	0.108574	0.184327	0.176144	0.208828	0.159749	0.0604966	0.0400877		0.0833693
3.29_345.133				345.133		3.29	30	15	15	0	0.32911	0.316545	0.48349	0.411478	0.224266	0.397353	0.448058	0.505882	0.399824	0.281213	0.354457	0.358062	0.459654	0.340426	0.354346	0.271	0.203435	0.31988	0.226358	0.384138	0.23671	0.237522	0.22984	0.428355	0.173577	0.217104	0.325047	0.178838	0.162084	0.231353
3.76_346.032				346.032		3.76	40	15	15	10	1.20512	1.53991	1.77687	2.09029	1.77248	1.63743	1.4999	1.45086	0.831264	1.3312	1.69034	2.43652	2.44061	2.62267	2.36961	1.43182	1.60239	1.44812	2.471	1.76308	1.4056	0.866439	1.34631	1.60613	1.32471	1.25072	1.19306	1.51703	1.29472	0.792765	0.71578	0.858512	0.67926	1.69148	0.982937	0.8604	1.01096	0.911172	1.3382
1.22_346.088				346.088		1.22	29	15	14	0	1.37234	0.780035	0.925267	1.12178	1.71473	0.72568	2.1442	2.18675	1.55968	1.15012	1.37377	1.01918	0.463539	0.490425	0.30742	0.766403	0.970078	0.559133	1.59337	1.92812	0.950905	0.88446	0.554919	1.21755	0.63216	0.570212	0.557175	0.155659	0.144018
3.17_346.125				346.125		3.17	24	15	9	0	0.374772	0.196242	0.109114	0.380608	0.383904	0.32004	0.659649	0.240984	0.430685	0.522745	0.49676	0.448023	0.341259	0.326114	0.43043	0.159201	0.201204	0.145889	0.285933	0.171684	0.170244	0.0745195	0.0504452	0.136907
2.29_346.125				346.125		2.29	30	15	15	0	0.42292	0.251794	0.211079	0.422953	0.594627	0.328593	0.586356	0.469445	0.434284	0.422056	0.600345	0.407463	0.346628	0.254033	0.208844	0.197529	0.272626	0.245996	0.403865	0.278583	0.247919	0.113185	0.142888	0.262217	0.149029	0.132667	0.191091	0.0854141	0.118532	0.143554
1.92_346.125				346.125		1.92	30	15	15	0	0.446124	0.372328	0.525065	0.498145	0.542721	0.421806	0.72845	0.630508	0.50671	0.542671	0.620813	0.44875	0.454058	0.395376	0.417645	0.337323	0.31233	0.326195	0.299929	0.399578	0.340596	0.334833	0.272366	0.42643	0.272385	0.261024	0.296419	0.194864	0.220893	0.314264
0.7_347.062				347.062		0.7	40	15	15	10	1.9409	1.3728	1.89864	1.74413	1.77307	1.24671	2.16211	1.48398	1.08882	1.67167	1.59669	1.36739	0.887307	1.86236	1.32252	4.85157	4.06578	3.22715	8.30098	6.02791	5.50132	4.07615	5.11724	5.18312	3.64386	2.60765	2.7262	1.68537	1.76696	1.45321	10.0879	13.9833	8.77629	8.47892	11.1538	11.4742	3.19082	7.88152	1.08032
1.68_347.12				347.12		1.68	30	15	15	0	0.571161	0.557352	0.621673	0.767155	0.945725	0.549284	1.30141	0.915341	0.776962	0.966853	1.17216	0.761695	1.15219	0.918515	1.08824	0.38316	0.420862	0.427764	0.404698	0.770034	0.521117	0.710178	0.802869	0.826668	0.564194	0.613763	0.744499	0.662798	0.848406	1.1765
2.78_347.122				347.122		2.78	30	15	15	0	0.955913	0.498306	0.441746	1.76398	1.74059	0.836054	2.47671	1.19371	1.57274	1.7668	1.78725	1.8304	2.032	1.32204	1.54754	0.433234	0.59758	0.469135	1.32636	0.708643	0.772065	0.677639	0.77006	2.02437	0.948101	1.05311	0.889529	1.18979	1.0941	0.814571
3.75_348.031				348.031		3.75	40	15	15	10	0.617641	0.687622	0.850062	0.944239	0.848231	0.789313	0.780159	0.681782	0.392794	0.573479	0.789787	1.21977	1.17443	1.22319	1.13644	0.69123	0.774256	0.747103	1.19238	0.827706	0.62591	0.392556	0.651695	0.662959	0.633078	0.594555	0.562494	0.751847	0.622124	0.402646	0.374516	0.406021	0.337405	0.86875	0.494526	0.426841	0.494528	0.441939	0.693078
1.82_348.064				348.064		1.82	36	15	15	6	0.799593	0.573046	0.676915	1.44979	1.15459	0.811967	1.41875	0.843314	0.63473	0.668326	0.978452	1.03479	0.839221	0.670572	0.666435	0.422556	0.619064	0.392463	0.964918	0.405499	0.411583	0.285418	0.283283	0.496311	0.354857	0.259067	0.292159	0.311283	0.208855	0.203487	0.0347322	0.0338535	0.0456648		0.0409746	0.0431448		0.0623198
1.53_348.106				348.106		1.53	30	15	15	0	2.83364	2.30202	2.75844	3.45398	3.56342	3.14404	5.34121	4.40128	3.55009	4.66683	4.56196	3.36456	3.28275	2.69709	3.06958	1.71889	1.85311	1.71796	2.25709	2.52564	1.87565	1.87724	1.70897	3.27327	1.71459	1.8534	2.22108	1.71814	1.69774	2.4704
1.49_348.152				348.152		1.49	30	15	15	0	0.117699	0.108741	0.114908	0.237277	0.241071	0.13867	0.519074	0.352026	0.248611	0.397377	0.540893	0.333534	0.332354	0.405827	0.573923	0.0937782	0.109502	0.0854348	0.202533	0.153089	0.121823	0.226804	0.206644	0.249155	0.237258	0.310887	0.288448	0.267005	0.296129	0.43943
3.99_348.178				348.178		3.99	29	15	14	0	0.540958	0.342493	0.192129	0.798927	0.788067	0.493585	1.3498	1.14003	0.940797	1.58664	1.97385	1.06875	1.12158	0.890219	0.874605	0.201666	0.285914	0.240507	0.484082	0.264761	0.357037	0.178244	0.156496	0.390519	0.18446	0.168748	0.169986	0.136159	0.158354
3.72_348.178				348.178		3.72	30	15	15	0	0.484441	0.178763	0.525049	0.271356	0.416325	0.21098	0.790015	1.7603	0.638877	0.405192	0.539584	1.1875	0.193888	0.473014	0.326006	0.125064	0.142222	0.107527	0.807737	0.163252	0.235627	0.600151	0.216905	0.250318	0.131625	0.477468	0.0870148	0.0702998	0.121827	0.181374
3.64_348.178				348.178		3.64	33	15	15	3	0.823702	0.43566	0.466424	0.743665	0.719698	0.690701	1.31794	2.46599	1.12271	1.28439	1.50394	0.546883	1.36015	0.718844	0.591985	0.403713	0.346992	0.384639	0.968117	0.4839	0.617081	0.527828	0.354949	0.927186	0.56384	0.384499	0.66505	0.229397	0.359136	0.661587	0.0718211	0.054414		0.0661847
5.71_348.206				348.206		5.71	29	14	15	0	0.292038	0.0939313	0.48882	0.190433	0.350416	0.147235	0.836235	0.366959	0.158968	0.396009	0.31821	0.653688	0.209833		0.252086	0.214627	0.307434	0.128399	0.599695	0.278849	0.284697	0.433122	0.315574	0.500488	0.370223	0.250899	0.0999115	0.205665	0.141039	0.145453
2.12_349.101				349.101		2.12	24	12	12	0	0.166028	0.213967	0.247273	0.114421	0.151574	0.195081	0.333607	0.381272	0.577028	0.258922	0.121398			0.142255				0.0862967		0.298756	0.125093	0.155101	0.427197	0.486658	0.0849016	0.173222	0.24661	0.0704095	0.148177	0.0953581
2.48_349.137				349.137		2.48	30	15	15	0	0.426033	0.335523	0.25979	0.770131	0.749454	0.35955	1.10274	0.824818	0.817807	1.23633	1.37443	0.788038	1.0614	0.649243	0.948133	0.230137	0.287987	0.228759	0.530789	0.391377	0.334708	0.404632	0.373478	0.868275	0.492917	0.48155	0.436488	0.531027	0.541221	0.527883
2.45_349.988				349.988		2.45	30	15	15	0	0.353793	0.239268	0.274641	0.393599	0.357227	0.333396	0.302037	0.392603	0.285277	0.253927	0.278072	0.393065	0.36384	0.390917	0.325287	0.23737	0.271821	0.276815	0.441153	0.304664	0.276964	0.25416	0.236613	0.306493	0.301558	0.268993	0.317925	0.234025	0.210643	0.174281
2.12_350.02				350.02		2.12	38	14	15	9	0.113492	0.111317	0.27149	0.120631	0.139956	0.198614	0.222086	0.344641	0.178972	0.363158	0.303184	0.130035	0.121305		0.211396	0.201401	0.187317	0.158639	0.576462	0.498136	0.264273	0.592971	0.378397	0.861766	0.839057	0.684497	0.546098	0.507798	0.494254	0.46012	0.319662	0.318055	0.324051	0.435057	0.33502	0.36254	0.151659	0.246422
3.75_350.023				350.023		3.75	40	15	15	10	0.280756	0.353788	0.372672	0.413493	0.348038	0.365553	0.360044	0.304222	0.190405	0.267708	0.410062	0.497429	0.510918	0.520293	0.514405	0.283507	0.358648	0.321562	0.538302	0.305315	0.264523	0.162388	0.254924	0.267871	0.265453	0.208573	0.243171	0.249557	0.27059	0.168973	0.150417	0.16502	0.158036	0.40533	0.207278	0.165145	0.175217	0.176321	0.26299
1.74_350.085				350.085		1.74	28	13	15	0	0.263468		0.182144	0.258443	0.253462		0.275815	0.219991	0.253179	0.377572	0.305395	0.366241	0.22495	0.143282	0.167095	0.411574	0.178473	0.398863	0.400171	0.151164	0.154475	0.131037	0.114983	0.146373	0.0955875	0.0829984	0.0902917	0.122919	0.09152	0.162743
1.39_350.085				350.085		1.39	30	15	15	0	0.527061	0.296255	0.267686	0.545415	0.579759	0.324927	0.634797	0.589001	0.508396	0.544344	0.808563	0.591047	0.368086	0.302827	0.375209	0.250646	0.3581	0.322188	0.411544	0.276363	0.297456	0.296965	0.37858	0.423695	0.249964	0.307662	0.35301	0.249506	0.239138	0.286792
2.37_350.121				350.121		2.37	29	15	14	0	0.350456	0.191998	0.116481	0.406233	0.509737	0.227561	0.564843	0.346665	0.433543	0.419879	0.700973	0.365907	0.287033	0.314469	0.255488	0.141916	0.169948	0.162637	0.278918	0.198003	0.191493	0.126574	0.126942	0.258682	0.129297	0.0759384	0.12915		0.0967453	0.0878846
1.55_351.099				351.099		1.55	30	15	15	0	1.30664	0.92354	0.617735	2.69509	2.07648	1.75281	2.61185	1.7526	1.73978	2.41434	2.47345	3.38151	2.91712	1.92214	1.69998	0.685488	1.041	0.746196	2.02977	0.828385	0.974424	0.495306	0.506963	1.16657	0.749247	0.709275	0.730527	0.553995	0.559237	0.329732
5.96_351.132				351.132		5.96	37	15	15	7	1.15208	0.451928	3.74743	0.43519	0.530654	1.74559	0.581466	1.71804	0.629442	1.44356	3.617	1.4552	1.45069	0.453365	1.03852	0.417206	0.406624	0.842581	0.916788	0.915138	0.972057	0.583607	0.479494	0.81394	0.179582	0.280314	0.912238	2.40797	0.296792	0.622131	0.463994	0.281297	0.415091	0.552125			0.0692507		0.123933
4.11_352.077				352.077		4.11	18	0	14	4																0.0813417		0.0694723	0.674036	0.202498	0.309465	0.918297	0.830197	0.957062	0.723977	0.293527	0.195761	0.19071	0.241193	0.157808			0.038195		0.101106	0.165579		0.036045
3.76_352.088				352.088		3.76	40	15	15	10	0.142498	0.178634	0.21484	0.23775	0.207197	0.201721	0.177399	0.222434	0.113149	0.147585	0.18738	0.405513	0.276449	0.282498	0.257903	0.162869	0.175042	0.154129	0.26931	0.176495	0.153085	0.0969304	0.127293	0.198121	0.136318	0.131512	0.125001	0.173784	0.134314	0.114032	0.0875725	0.106495	0.0782894	0.213108	0.110922	0.0877842	0.0974744	0.0956999	0.136063
2.77_352.094		C20H16O6	352.095	352.094	0.69	2.77	27	15	12	0	0.233379	0.214539	0.200528	0.522471	0.538529	0.269331	0.621386	0.570135	0.339521	0.528909	0.674431	0.503003	0.457965	0.417041	0.367315	0.18111	0.162734	0.149547	0.231255	0.137272	0.160069	0.0980007	0.0875293	0.219211	0.08125	0.0620759	0.0852993
2.37_352.095		C20H16O6	352.095	352.095	-0.31	2.37	26	15	11	0	0.807601	0.458256	0.260976	1.55643	1.28524	0.687702	2.0752	1.2328	1.34601	2.62017	2.48224	1.70246	1.21249	1.35116	2.09469	0.283463	0.42767	0.216973	0.407604	0.175058	0.20525	0.112709		0.215696	0.110212	0.0564397				0.127455
1.6_352.1				352.1		1.6	30	15	15	0	1.93614	1.25538	0.822466	2.70866	1.52943	2.14555	1.63825	1.57814	1.51599	1.90086	2.06253	0.502011	0.580351	0.486552	0.49212	0.849481	0.493029	0.631758	0.624832	0.517481	0.538374	0.465168	0.291374	0.454916	0.275223	0.289634	0.231017	0.229622	0.190756	0.127932
2.25_352.136				352.136		2.25	30	15	15	0	0.498178	0.356185	0.567798	1.42017	1.65566	0.56254	2.16913	2.88846	2.05105	3.37227	2.91136	2.01784	1.49454	0.773886	0.546456	0.387825	0.552233	0.244711	2.10126	0.706668	0.454107	0.880924	0.973445	1.23408	1.25557	0.720734	1.07195	0.894063	0.881325	0.660785
1.57_352.137				352.137		1.57	19	0	9	10																						0.404979	0.380546	0.49106	0.355406	0.475173	0.371158	0.379758	0.430281	0.590402	2.27986	2.4763	3.33019	2.3037	1.17203	1.1704	0.711465	1.2911	1.13603
3.03_352.172				352.172		3.03	30	15	15	0	0.272594	0.273525	1.07756	1.21416	0.240691	0.500471	0.832276	0.838453	0.669249	1.06117	1.44005	0.784769	0.579569	0.179601	0.335916	0.121056	0.170937	0.225809	0.287556	0.219022	0.138869	0.463237	0.37981	0.465348	0.430076	0.717395	0.232745	0.322995	0.43885	0.853665
4.2_352.173		C15H28O9	352.173	352.173	0.33	4.2	30	15	15	0	1.54552	1.01228	0.576922	1.57994	1.75957	1.20753	4.49796	1.69464	1.92385	4.22405	3.51833	2.45496	2.98199	2.09483	3.91672	4.53462	6.57252	3.50292	7.05149	4.71347	3.84473	5.6242	4.03939	9.82732	7.72792	9.37032	5.78815	11.0606	6.83638	5.41716
2.94_352.173		C15H28O9	352.173	352.173	0.33	2.94	30	15	15	0	0.376169	0.131291	0.250561	0.456712	0.399735	0.109456	0.499423	0.336352	0.468288	0.599795	0.654992	0.876183	1.37536	0.604358	0.479942	0.342553	0.189583	0.401471	0.279161	0.0759232	0.290251	0.331502	0.225239	0.502829	0.337584	0.409364	0.29966	0.470988	0.432937	0.803537
6.15_352.224				352.224		6.15	25	0	15	10																0.229045	0.184349	0.109523	0.253584	0.206268	0.196327	0.195682	0.14925	0.451899	0.157974	0.202889	0.134407	0.157098	0.0980281	0.151768	0.884855	0.830737	0.854515	0.39392	1.28531	0.899344	0.642539	0.960063	0.50029
1.09_353.017				353.017		1.09	30	15	15	0	7.93187	9.70048	10.7348	19.123	14.1366	8.92972	14.6723	12.033	7.9904	10.3549	11.934	13.6603	14.3201	8.34009	7.16192	6.81506	7.80555	6.00589	14.1026	8.80898	7.2838	4.23708	6.68119	7.85086	7.97039	5.34044	7.01536	7.99047	5.77216	3.27726
2.61_353.075				353.075		2.61	30	15	15	0	1.6628	0.791523	1.31475	0.812748	0.656328	0.904192	1.39312	1.05097	1.03838	0.964322	0.927388	0.433046	0.644867	0.681199	0.733667	0.509321	0.398376	0.591287	0.28564	0.719555	0.428141	0.713742	0.426588	0.838057	0.367022	0.478093	0.703756	0.269451	0.624634	0.662355
5.04_354.11				354.11		5.04	30	15	15	0	0.242175	0.198071	0.16493	0.311435	0.213917	0.291528	0.163384	0.208613	0.14455	0.212949	0.310034	0.23671	0.263005	0.22375	0.250465	0.221204	0.234654	0.232839	0.355288	0.194078	0.158747	0.172764	0.117944	0.319438	0.193228	0.10926	0.182281	0.170118	0.0934853	0.0795291
3.47_354.111				354.111		3.47	30	15	15	0	0.345537	1.05469	0.253243	0.352102	1.58696	1.2477	0.509969	1.65455	0.247057	0.331747	0.43929	0.205739	1.08416	0.166998	0.846523	0.798903	0.179326	0.870748	0.999592	1.11374	0.185618	0.989977	0.65406	1.28476	0.658559	0.15208	0.763516	0.147966	0.123809	0.177832
3.44_354.111				354.111		3.44	30	15	15	0	0.953865	1.05815	0.841308	0.853882	1.56316	1.25248	1.09671	1.30395	0.91122	1.01396	0.98608	0.689517	1.10871	0.673421	0.885943	0.624992	0.693449	0.87728	0.998379	1.11324	0.825938	0.989977	0.647372	1.28476	0.65435	0.426638	0.771109	0.33782	0.426071	0.381719
1.59_354.113				354.113		1.59	26	6	10	10	0.0944907			0.102588		0.163528				0.0658566	0.122081	0.107327				0.0697959			0.154898	0.118397	0.0902996	0.145985	0.0772757	0.169688	0.215234	0.206049	0.0461637				0.495128	0.616497	0.583691	1.13339	0.921413	0.78055	0.365036	0.643852	0.0785654
3.58_354.129				354.129		3.58	26	13	13	0	0.313244	0.474479	0.458151	0.217369	0.561875	0.278604	0.932437	0.313907	0.279551	0.44271	0.263729		0.119398	0.217604		0.3219	0.191698	0.107969	0.0967112	0.365952	0.21633	0.134668	0.175187	0.374678		0.113073	0.154811		0.205575	0.13237
2.83_354.151				354.151		2.83	30	7	13	10	0.0948604					0.141936	0.0857693	0.132942	0.204196	0.287485	0.317159					0.122626		0.142738	0.158069	0.108331		0.118751	0.10123	0.15785	0.131606	0.069741	0.0809009	0.0797941	0.0782233	0.252367	0.17126	0.193404	0.306823	0.379533	0.175595	0.159729	0.117299	0.226254	0.0702894
1.92_354.152				354.152		1.92	28	14	14	0	0.203651	0.13016	0.198323	0.435731	0.323663	0.143313	0.466729	0.415326	0.308185	0.50692	0.359938	0.286956	0.169785		0.165744	0.175378	0.171769	0.0984434	0.58422	0.184779	0.191907	0.145439	0.138387	0.215633	0.153342	0.174021	0.203	0.0615787	0.133124
1.64_354.152				354.152		1.64	30	15	15	0	2.31939	2.99033	3.0428	6.73885	3.06099	2.79406	4.97057	7.70548	4.69744	9.00342	7.19501	6.71548	7.00255	5.46438	2.81595	1.84722	2.21008	1.67571	6.64658	3.48756	2.70622	3.61581	4.31341	4.26711	4.70035	3.69152	6.60925	4.24898	4.44254	1.94316
3.64_354.188				354.188		3.64	26	15	11	0	0.292297	0.320891	0.150513	0.571601	0.418352	0.253054	0.784168	0.587058	0.444402	0.410704	0.825971	0.5031	0.636844	0.451803	0.308618	0.117403	0.0990887	0.176904	0.317486	0.14883	0.215562	0.155859		0.157993	0.114589	0.0515928	0.0808508
3.42_354.189				354.189		3.42	30	15	15	0	1.59194	1.10673	0.736836	2.1576	2.07675	1.15337	2.78162	2.26075	1.51836	2.33469	3.69916	1.71637	2.11675	1.46554	0.953751	0.957006	1.00943	1.17699	2.00109	1.18586	1.22659	1.33255	0.821104	1.7049	1.66757	2.114	1.29939	1.56083	1.28649	0.716608
3.2_354.189				354.189		3.2	30	15	15	0	2.33939	1.44723	1.38831	3.1577	3.22118	2.21915	4.01371	3.23086	2.55263	4.11823	2.79172	3.1279	3.85085	3.1696	2.13598	1.53735	1.41928	1.07856	3.20985	1.52309	1.69622	1.81261	1.75961	2.49148	2.2786	2.64767	1.76565	2.07055	1.77197	2.00245
1.91_355.999				355.999		1.91	30	15	15	0	0.498824	0.250946	0.28619	0.308132	0.662136	0.213692	0.731012	0.445776	0.621206	0.284021	0.232602	0.174037	0.184915	0.39702	0.2199	0.0860035	0.271948	0.234296	0.16405	0.340959	0.334924	0.319577	0.187315	0.280753	0.179669	0.0663884	0.194266	0.127008	0.136482	0.202545
4.99_356.036				356.036		4.99	40	15	15	10	0.559063	0.731773	0.989892	1.04136	0.884809	0.904595	0.629135	0.559348	0.356955	0.46965	0.692519	0.787994	1.04166	1.17763	0.888998	0.652507	0.780149	0.743308	1.12538	0.862945	0.657244	0.425391	0.63546	0.415152	0.554194	0.492602	0.710032	0.750964	0.624385	0.439804	0.647241	0.368546	0.402386	1.06314	0.571362	0.421788	0.521727	0.444744	0.925813
2.91_356.111				356.111		2.91	30	15	15	0	0.79649	0.837872	1.45853	0.844568	0.806509	0.564532	1.69811	1.30324	0.701475	0.738813	1.14162	0.445593	0.573259	0.907957	0.666563	0.47644	0.332049	0.392581	0.44138	0.84479	0.410028	0.479957	0.369146	0.446832	0.248007	0.364234	0.330757	0.327913	0.326193	0.62049
2.58_356.111				356.111		2.58	30	15	15	0	0.39555	0.457719	0.592152	0.373217	0.416467	0.375016	0.539181	0.505244	0.377136	0.409587	0.391173	0.286722	0.280111	0.311984	0.247805	0.273378	0.278982	0.274272	0.239581	0.416423	0.223053	0.316862	0.200112	0.293124	0.14986	0.170597	0.243706	0.158629	0.138473	0.209373
2.02_356.113				356.113		2.02	30	15	15	0	0.238311	0.12126	0.152666	0.316753	0.365758	0.258289	0.646628	0.460602	0.438526	0.68268	0.638796	0.604229	0.414265	0.520375	0.417159	0.115716	0.1581	0.107722	0.18857	0.107173	0.139455	0.145525	0.135734	0.126093	0.183319	0.198588	0.151407	0.129059	0.137046	0.135198
1.25_356.132				356.132		1.25	30	15	15	0	5.03167	3.62098	3.30648	6.00818	7.20898	3.82258	7.71033	5.14048	5.07852	5.14289	10.3555	5.08032	5.63584	5.09695	5.38316	2.85685	4.20754	4.41097	4.10384	4.2812	4.0454	3.77946	3.86134	5.26392	3.9193	3.39984	4.06685	3.95566	3.83919	5.77276
2.53_356.167				356.167		2.53	30	15	15	0	0.697853	0.508504	0.249492	1.04004	0.9012	0.639845	1.32231	1.14027	1.04404	2.2091	1.90546	0.98663	1.30197	1.08626	1.29308	0.30099	0.450644	0.332767	0.779831	0.636041	0.449284	0.502511	0.353484	0.853687	0.431098	0.547995	0.412596	0.39313	0.440127	0.517538
5.46_356.218				356.218		5.46	20	0	14	6																0.0725652	0.117487		1.42257	0.267996	0.24591	0.533688	1.17433	1.99908	1.98193	1.64905	0.332031	0.37285	0.435821	0.420354	0.0346243		0.0370291		0.11665	0.0597803	0.0596652	0.0967208
1.13_358.06				358.06		1.13	31	6	15	10	0.133721		0.303473				0.136982	0.213884		0.119095					0.234351	0.203038	0.1486	0.12906	0.277099	0.284201	0.222562	0.181442	0.190595	0.167526	0.150035	0.14919	0.0982075	0.0971863	0.186326	0.151605	1.05934	1.17814	1.09966	0.820238	0.622434	0.596406	0.0991989	0.363161	0.113994
2.6_358.065				358.065		2.6	30	15	15	0	1.46683	1.44478	2.2641	1.67207	1.32659	1.77895	2.35942	1.70836	1.40724	1.54288	1.61031	1.07033	1.59663	1.91179	1.89371	0.895803	0.838221	1.00465	0.638016	1.20667	0.789943	0.68861	0.644413	0.969917	0.597058	0.841512	1.12874	0.583008	1.09791	1.04425
2.7_358.125				358.125		2.7	30	15	15	0	3.04232	1.59144	1.8122	5.282	2.08314	4.1529	3.28046	2.96881	2.30955	2.22348	3.13034	1.83317	1.87377	1.66231	4.88856	1.0673	0.946823	1.79724	2.81053	1.4085	1.16889	1.52464	1.10067	2.0882	1.99012	2.43391	3.52759	2.68962	2.46989	3.15644
2.73_358.126				358.126		2.73	30	15	15	0	5.70584	2.5878	3.75108	2.35621	3.16801	3.96668	5.23053	3.14758	2.9732	3.26669	3.15457	2.1617	2.84895	5.20315	4.71636	1.52766	1.6746	3.25856	2.67908	2.4986	1.58527	1.70698	1.37947	2.45804	1.91817	2.37238	3.40667	2.60746	2.40429	3.07823
2.22_358.126				358.126		2.22	29	15	14	0	0.52323	0.216049	0.335414	0.408838	0.297564	0.358742	0.712353	0.381206	0.356938	0.283164	0.373976	0.158893	0.218374	0.315959	0.420894	0.145113	0.201838	0.191822	0.153989	0.379874	0.291916	0.169583		0.269228	0.110504	0.12458	0.113714	0.090707	0.168778	0.24284
3.11_358.131				358.131		3.11	29	14	15	0	0.560027	0.4245	0.420178	0.438038	0.554796	0.325942	1.20674	0.742637	0.654554	0.74543	0.845758	0.450212	0.332518	0.399434		0.190343	0.217779	0.200855	0.232866	0.311495	0.160267	0.291023	0.18399	0.370189	0.101854	0.130433	0.237028	0.149194	0.143633	0.231906
1.09_358.979				358.979		1.09	30	15	15	0	0.608425	0.546877	0.676704	1.02511	0.868935	0.636462	1.04638	0.899881	0.588228	0.808706	0.8302	0.842842	0.762263	0.471199	0.533666	0.503745	0.442101	0.371289	0.861739	0.52458	0.524267	0.407692	0.550981	0.71865	0.58077	0.438179	0.496973	0.607855	0.438354	0.26298
1.36_359.089				359.089		1.36	38	15	15	8	0.155414	0.103458	0.140864	0.162791	0.119147	0.140798	0.147611	0.0793921	0.0807626	0.16476	0.147102	0.106628	0.123536	0.148499	0.172349	0.381677	0.281326	0.196905	0.439725	0.366278	0.280729	0.237741	0.254422	0.31008	0.20061	0.226	0.190498	0.192073	0.206039	0.160921	0.0741736	0.049057	0.0660667		0.841858	0.5915	0.632959	0.920567
3.65_359.122				359.122		3.65	30	15	15	0	0.233933	0.13494	0.114182	0.290722	0.349864	0.185747	0.367713	0.302827	0.25547	0.361172	0.432901	0.296753	0.313999	0.286092	0.218674	0.12125	0.177462	0.11854	0.273767	0.188047	0.179467	0.120624	0.153367	0.213866	0.150421	0.122352	0.131646	0.0937546	0.177252	0.170771
3.75_360.013				360.013		3.75	40	15	15	10	0.250778	0.311004	0.375462	0.354823	0.319019	0.304483	0.190206	0.188994	0.101731	0.150225	0.237283	0.551236	0.441381	0.438144	0.396527	0.283535	0.343158	0.308751	0.517304	0.299083	0.230645	0.135465	0.227999	0.271005	0.244087	0.221598	0.217482	0.303536	0.214803	0.129246	0.171071	0.208385	0.162438	0.44077	0.232747	0.20893	0.235741	0.203839	0.305474
1.68_360.063				360.063		1.68	30	15	15	0	0.666788	0.882867	0.928559	0.749628	1.06427	0.609116	0.767334	0.790999	0.494061	0.545792	0.405389	1.03997	0.783719	0.68253	0.462606	0.29949	0.632183	0.516561	1.01436	0.866941	0.607456	0.221561	0.502635	0.664062	0.583767	0.374922	0.616943	0.485108	0.526173	0.331385
2.14_360.105				360.105		2.14	30	15	15	0	1.08651	1.98003	1.52382	1.48033	1.35096	1.73646	2.61659	2.5848	1.77508	2.23711	2.12616	1.50902	1.39219	2.69158	1.45453	0.857913	0.78835	0.769633	0.937016	1.87044	1.01099	1.1788	1.14143	1.38417	1.05447	1.70659	2.04094	1.02643	1.08018	1.40371
1.97_360.105				360.105		1.97	30	15	15	0	0.205082	0.102012	0.138075	0.175177	0.233863	0.165296	0.278698	0.26176	0.190373	0.230447	0.299748	0.216423	0.207394	0.272692	0.140286	0.12047	0.16808	0.113133	0.206745	0.181902	0.142581	0.130188	0.135011	0.214139	0.152057	0.135108	0.15406	0.104374	0.150532	0.162199
3.29_360.156				360.156		3.29	30	15	15	0	0.201812	0.165689	0.473425	0.506085	0.387222	0.388741	0.653036	0.428614	0.463703	0.269658	0.206788	0.240619	0.252177	0.429371	0.321801	0.376213	0.165263	0.292584	0.167575	0.25664	0.22418	0.328144	0.216321	0.413784	0.196807	0.26572	0.290583	0.201348	0.0949637	0.262549
1.22_362.056				362.056		1.22	30	15	15	0	1.2664	0.759971	0.893662	0.988167	1.52775	0.717394	1.80613	1.82828	1.43702	1.00797	1.19223	0.922341	0.510996	0.490288	0.274423	0.751229	0.930732	0.539785	1.50931	1.82936	0.908558	0.878305	0.489136	1.08823	0.60159	0.582148	0.50734	0.124261	0.148352	0.0886153
2.05_362.085				362.085		2.05	30	15	15	0	0.49239	0.191969	0.185884	0.541524	0.670967	0.489186	0.88377	0.583154	0.568593	1.00567	1.67202	1.06633	1.32507	0.520434	0.718998	0.417481	0.538129	0.342158	1.00091	0.828981	0.726322	1.34892	1.99606	1.36023	1.45828	1.2179	1.81937	2.75676	2.09769	2.92208
4.95_362.097				362.097		4.95	40	15	15	10	0.23903	0.266695	0.288203	0.403248	0.298837	0.298036	0.258992	0.284737	0.210261	0.202133	0.301658	0.469946	0.458284	0.415787	0.485833	0.282108	0.317067	0.230314	0.450637	0.274749	0.263347	0.180624	0.280896	0.324946	0.235099	0.297098	0.296958	0.22803	0.236134	0.161355	0.233961	0.217459	0.248467	0.284174	0.221923	0.199452	0.285424	0.282547	0.224962
1.08_362.113				362.113		1.08	22	4	10	8			0.136978					0.124451	0.0712072	0.140728						0.121187	0.102713		0.38681	0.311023	0.185385	0.177879	0.157037	0.354956	0.11288	0.0928107					1.01556	1.14214	0.883122	1.41539	0.288261	0.479094		0.1391
1.75_362.119				362.119		1.75	30	15	15	0	0.243066	0.130963	0.182423	0.270476	0.376724	0.171948	0.561136	0.520649	0.25963	0.303843	0.332248	0.202559	0.243664	0.227618	0.283216	0.136263	0.14409	0.136557	0.133536	0.267692	0.159094	0.168053	0.107193	0.205519	0.108769	0.118152	0.110256	0.114628	0.198949	0.254415
3.52_362.158				362.158		3.52	30	15	15	0	0.400084	0.234797	0.344661	0.233506	0.360328	0.222326	0.444622	0.557941	0.556324	0.412817	0.428071	0.248365	0.52783	0.371437	0.412502	0.189648	0.209876	0.245795	0.177075	0.361937	0.207468	0.254557	0.314791	0.558033	0.145051	0.216941	0.295574	0.168113	0.279806	0.38241
0.76_363.058				363.058		0.76	40	15	15	10	0.25625	0.175426	0.268933	0.242208	0.252163	0.197561	0.265923	0.290318	0.14599	0.176701	0.214001	0.184561	0.174305	0.192259	0.220092	0.663142	0.657173	0.462929	0.933607	0.721597	0.697894	0.529788	0.634897	0.541604	0.501126	0.391865	0.361279	0.279498	0.268483	0.23024	1.91816	2.12543	1.44121	1.29257	1.28766	1.31823	0.413328	0.843703	0.287616
1.57_364.096				364.096		1.57	30	15	15	0	0.327237	0.266533	0.266635	0.31213	0.331587	0.239061	0.583133	0.308726	0.267205	0.415149	0.484066	0.348335	0.506159	0.659831	0.85778	0.177148	0.221099	0.138709	0.261854	0.221963	0.172603	0.137962	0.193556	0.234627	0.263202	0.272489	0.195269	0.230134	0.411146	0.354148
3.09_364.115				364.115		3.09	34	15	15	4	2.34868	0.835321	2.28219	1.55412	2.17509	1.20255	3.22855	2.38912	1.67804	1.88917	2.54325	0.65871	1.84612	2.72131	2.62729	1.02143	1.35613	1.16205	1.47659	1.55519	1.37981	1.31105	1.44473	2.64419	0.792217	0.861987	1.16343	1.27587	1.54039	1.94595			0.0375385				0.0363052	0.0287352
2.73_364.116				364.116		2.73	30	15	15	0	1.23501	1.22656	1.34322	1.14649	1.36965	0.662458	1.5114	1.12791	1.02895	1.00404	1.22026	0.692538	0.604834	0.659969	0.768325	0.68631	0.896923	0.877854	0.753254	1.20517	0.803552	0.741655	0.29822	0.940957	0.363285	0.434802	0.378429	0.226378	0.289312	0.31964
6.08_364.222				364.222		6.08	39	15	15	9	0.239822	0.181026	0.274093	0.200584	0.306272	0.218284	0.255878	0.343748	0.174355	0.387235	0.443497	0.273793	0.212001	0.290066	0.276029	0.636961	0.619973	0.412645	1.25914	1.1052	0.659541	1.39916	0.70985	2.36052	0.755781	0.940016	0.527657	0.647626	0.493112	0.405457	0.0884223	0.0626454	0.114339		2.16226	2.05215	1.37958	1.46209	0.124687
0.85_365.086				365.086		0.85	38	15	13	10	0.251733	0.162874	0.236034	0.265783	0.258911	0.252339	0.323065	0.267553	0.272063	0.232121	0.476234	0.385071	0.416791	0.26548	0.426442	0.240065	0.301395	0.198897	0.394433	0.299223	0.19835	0.159258	0.158817	0.214143	0.143151	0.159908	0.174169		0.141986		1.08999	1.21848	0.679987	0.595679	0.348203	0.424221	0.101781	0.216873	0.110745
4.06_366.056				366.056		4.06	24	0	15	9																0.198644	0.0922282	0.0998772	0.793304	0.386194	0.411752	0.705764	0.440722	0.857252	0.378309	0.375363	0.149353	0.11422	0.115095	0.101979	0.325274	0.396585	0.444116	0.234777	0.328596	0.570704	0.0712159	0.0920119
1.92_366.062				366.062		1.92	30	15	15	0	8.30673	6.90467	9.25374	12.3672	20.7396	8.69333	21.2814	23.8094	31.8044	13.2664	10.6874	4.7087	9.13089	19.8315	9.8749	5.49632	6.65017	5.18203	3.9262	8.78233	7.03977	5.66325	23.0848	7.71412	3.55428	8.66088	9.91802	5.59111	12.2848	10.6229
2.12_366.064				366.064		2.12	30	7	14	9		0.123785	0.240624			0.149337	0.0845012	0.371822			0.301934				0.19237	0.208238	0.0550295		0.259714	0.214	0.237768	0.318199	0.514561	0.611295	0.623669	0.414471	0.278957	0.400732	0.389418	0.355098	0.250515	0.226806	0.275618	0.293254	0.238358	0.235314	0.0887291	0.16266
1.31_366.074				366.074		1.31	30	15	15	0	0.552843	0.863225	0.6438	1.33043	0.816536	0.91739	0.904143	0.678103	0.508535	0.707558	0.849027	0.799707	0.987659	1.41957	1.22014	0.423987	0.462409	0.586625	0.526281	0.612981	0.429378	0.480108	0.519968	0.525529	0.604887	0.672649	0.705077	0.557882	0.876429	0.635384
3.71_366.188		C16H30O9	366.189	366.188	0.98	3.71	30	15	15	0	2.76711	0.419799	0.287014	1.0507	1.05073	0.48337	1.76732	1.12269	0.822773	0.994888	2.16821	0.963254	1.56678	0.868543	1.07544	0.318599	0.414948	0.255117	0.418595	0.50799	0.375683	0.233916	0.273646	0.534642	0.200504	0.16753	0.331303	0.18056	0.230327	1.16118
3.77_366.189		C16H30O9	366.189	366.189	-0.02	3.77	30	15	15	0	2.76708	1.59963	1.83389	2.81501	2.89301	1.93633	4.79217	3.63201	2.73793	3.07373	4.67178	1.20791	2.44951	2.45953	3.50915	1.04687	1.11311	0.950817	0.977668	1.21796	1.04106	0.934256	0.903291	1.91008	0.517886	0.560127	0.864175	0.388906	1.15119	0.960988
3.54_366.189		C16H30O9	366.189	366.189	-0.02	3.54	19	11	8	0	0.144904	0.246159	0.215891			0.115019	0.866504	0.177763	0.123047	0.315537		0.566836		0.192773	0.160223			0.0743081		0.186796	0.0811188	0.165836	0.0778003	0.137717			0.108395		0.10622
1.2_367.103				367.103		1.2	34	15	15	4	0.127535	0.142743	0.177628	0.23934	0.165676	0.196978	0.15579	0.243711	0.125372	0.165238	0.158934	0.237475	0.252222	0.182452	0.199628	0.105827	0.127692	0.168626	0.159346	0.102584	0.158921	0.129412	0.21019	0.173479	0.157591	0.156173	0.186224	0.146216	0.144402	0.227892	0.0778311	0.0869616	0.0664937	0.119176
3.76_368.066				368.066		3.76	40	15	15	10	0.854345	1.05701	1.36905	1.32511	1.20914	1.25035	0.972247	1.00052	0.549165	0.711724	1.15798	2.1231	1.69323	1.83409	1.67958	0.965447	1.05397	1.04571	1.81981	1.09603	0.986051	0.621163	0.877845	1.0263	0.88824	0.804731	0.909349	1.05889	0.897331	0.630032	0.599825	0.666331	0.616266	1.38222	0.740434	0.633085	0.73481	0.690437	1.02009
1.58_368.078				368.078		1.58	30	15	15	0	1.46777	0.77361	0.944934	1.33852	1.73577	0.842753	2.7962	2.05101	1.82547	2.63398	2.70537	1.46485	1.55645	1.60674	1.77494	1.2534	0.85975	0.685184	1.02335	1.38912	0.943884	1.46993	1.83827	1.91294	1.09928	1.39957	1.35563	1.0298	1.35693	2.3361
1.44_368.091				368.091		1.44	30	15	15	0	0.169039	0.365104	0.68514	0.856361	0.214229	0.214604	0.629417	0.786021	0.374251	0.937264	0.515035	0.503499	0.202484	0.344823	0.216014	0.317377	0.260743	0.249751	0.478487	0.802171	0.321173	0.39396	0.518195	0.478603	0.297966	0.27066	0.490908	0.390602	0.312829	0.286944
4.07_368.147				368.147		4.07	15	0	15	0																0.136738	0.149387	0.145178	0.723362	0.589106	0.346163	1.03916	0.707251	1.81073	0.799654	0.914537	0.603817	0.622487	0.551339	0.761958
2.58_368.168				368.168		2.58	30	15	15	0	1.19142	0.616566	0.350154	1.27436	1.06942	0.871335	1.20798	1.14411	1.09356	1.94692	1.69315	1.86652	1.21849	1.37377	1.29201	0.600788	0.730956	0.535404	1.10081	0.734112	0.6697	0.430335	0.623138	0.859708	0.578871	0.601762	0.643566	0.363941	0.35314	0.337763
3.47_368.203				368.203		3.47	30	15	15	0	0.740338	0.405594	1.03438	1.34475	0.963285	0.85326	1.28191	0.86784	0.963725	2.03732	1.88034	1.62847	1.22613	1.4134	1.15315	0.433035	0.456405	0.340117	0.873083	0.339463	0.411809	0.261339	0.395174	1.01454	0.355855	0.515077	0.365716	0.316716	0.291567	0.426813
3.85_368.204				368.204		3.85	30	15	15	0	2.62364	1.96021	1.74792	3.76042	3.63789	2.28128	6.61755	4.54952	3.39311	5.4147	7.60651	2.80929	4.0055	2.65395	3.00784	1.48068	1.47342	1.02458	1.97121	1.88629	1.46563	1.15057	1.19755	2.29291	0.8095	0.8427	1.08193	0.481341	0.848617	0.967373
3.53_368.204				368.204		3.53	30	15	15	0	1.75886	0.795645	0.757153	2.96341	2.0935	1.95838	3.31352	2.42196	2.14356	4.43314	4.56868	3.02488	2.33162	2.20036	2.55999	0.678149	0.96529	0.827306	1.47123	0.723129	0.95658	0.711166	0.666675	1.16466	0.683923	0.733059	0.609034	0.499853	0.336299	0.826206
3.4_368.204				368.204		3.4	30	15	15	0	0.247677	0.0892095	0.881775	0.163309	0.250608	0.17455	1.31463	0.236704	0.22525	0.451769	0.409468	0.267576	0.234007	1.40447	0.140402	0.056015	0.0909131	0.278547	0.66207	0.282019	0.372284	0.0665944	0.388234	0.074907	0.0570022	0.501238	0.285751	0.0609316	0.275523	0.607669
4.91_368.222				368.222		4.91	40	15	15	10	0.324931	0.164522	0.134834	0.444374	0.338912	0.317382	0.558429	0.259708	0.253355	0.4608	0.493795	0.284014	0.433842	0.322376	0.348184	0.150088	0.188684	0.170739	0.348693	0.116049	0.232426	0.183105	0.168014	0.260032	0.188947	0.230471	0.163816	0.290246	0.176097	0.244783	0.37879	0.315387	0.34326	0.292697	0.45514	0.301218	0.213712	0.401532	0.316808
0.56_369.012				369.012		0.56	30	15	15	0	0.211099	0.652109	0.459116	0.989209	0.623691	0.889147	0.52282	0.608229	0.333168	0.468154	0.532426	0.681606	1.07617	0.566574	0.846286	0.225339	0.321733	1.19515	0.531584	0.663182	0.367367	0.198569	0.396841	0.590046	0.268867	0.43126	0.376151	0.382287	0.41913	0.296386
1.31_369.091				369.091		1.31	27	14	13	0	0.819826	0.237922	0.148119	0.382602	0.469835	0.367181	0.451149	0.404753	0.511807	0.603397	0.556076	0.146826	0.177818	0.0927913		0.185097	0.143072	0.164122	0.170747	0.23352	0.115834	0.200853	0.087967	0.226378	0.0694922	0.0604994	0.0648452			0.0720871
1.56_369.105				369.105		1.56	30	15	15	0	2.27444	0.644875	2.28165	2.07125	2.67473	2.02857	4.45093	2.48791	1.74592	2.88361	1.52424	0.758322	2.60896	0.798407	3.00763	1.05165	1.66865	1.28465	1.07647	0.724795	1.86689	1.03965	0.746663	0.947503	0.962035	1.43675	0.479195	0.616975	1.28701	1.28881
0.56_370.111				370.111		0.56	30	15	15	0	1.26574	1.65605	1.9437	2.45987	2.23699	2.10087	1.91476	1.27563	1.42084	1.49296	1.87888	1.64094	1.16817	0.925937	0.961911	1.06012	1.31787	1.45707	1.3819	2.44118	1.3387	1.1213	1.22589	1.87837	1.08345	0.993758	1.41934	0.928	0.778376	0.609245
3.2_370.126				370.126		3.2	30	15	15	0	0.168463	0.266958	0.146938	0.402418	0.247406	0.830135	0.387684	0.568404	0.257763	0.570754	0.255154	0.158596	0.2252	0.22081	0.15888	0.0983109	0.0894197	0.125446	0.262348	0.127231	0.155192	0.144377	0.903128	0.538919	0.085863	0.136343	0.147007	0.104794	0.150547	0.094845
1.5_370.147				370.147		1.5	30	15	15	0	1.67856	0.294063	0.35907	4.2885	0.532102	1.85543	0.583222	0.761113	0.532087	0.776683	0.415568	0.742829	0.703146	0.301593	1.64999	0.163884	1.42354	1.14784	0.767113	0.374797	0.328509	0.10799	0.339075	0.364814	0.402342	0.26463	2.6232	0.306936	0.327657	1.20228
1.41_370.147				370.147		1.41	30	15	15	0	1.81586	1.45506	1.83814	4.22049	2.90202	1.8931	3.64355	4.77144	2.9519	4.71248	4.08581	4.05821	3.6612	1.42974	1.65095	1.03514	1.42354	1.14802	4.20494	1.77477	1.48815	1.59639	1.64929	1.85142	1.9308	1.824	2.29677	1.38723	1.62515	1.2017
3.34_370.184				370.184		3.34	30	15	15	0	1.98067	1.13625	0.520095	2.16405	2.08622	1.28849	2.83804	1.96869	1.63804	3.3767	3.72092	1.86561	2.17494	2.02184	2.38299	0.772243	1.11092	0.878524	1.14777	1.22916	1.01668	0.654951	0.466231	1.4026	0.551569	0.488706	0.546985	0.426674	0.421078	0.45303
3.25_370.184				370.184		3.25	30	15	15	0	0.458047	0.404295	0.345083	0.575216	0.65646	0.451404	0.940817	0.648471	0.562469	0.741492	0.874593	0.5492	0.460746	0.446202	0.412061	0.332667	0.335258	0.280594	0.408892	0.436547	0.304909	0.244408	0.300459	0.416825	0.198965	0.181206	0.227314	0.159502	0.196195	0.255855
4.48_372.048				372.048		4.48	40	15	15	10	0.214825	0.275217	0.284501	0.495098	0.344847	0.311412	0.351791	0.303232	0.166832	0.191742	0.347995	0.370197	0.35786	0.533267	0.485264	0.282561	0.276902	0.277967	0.406593	0.305981	0.206555	0.160861	0.198786	0.234043	0.261914	0.231922	0.237082	0.212037	0.203687	0.194028	0.133466	0.147058	0.122987	0.25809	0.152882	0.146819	0.178608	0.147241	0.226554
1.39_372.066				372.066		1.39	30	15	15	0	0.256869	0.174671	0.138329	0.221282	0.33172	0.223631	0.358034	0.26469	0.222624	0.238065	0.360398	0.279472	0.271841	0.261319	0.264841	0.130538	0.209036	0.155767	0.209152	0.186506	0.179171	0.154055	0.175659	0.194729	0.146941	0.191469	0.202297	0.140643	0.155543	0.169629
2.28_372.105				372.105		2.28	28	14	14	0	0.306182	0.231287	0.246452	0.243667	0.247897	0.408926	0.391624	0.331543	0.268747	0.200444	0.287411		0.175447	0.190907	0.262376	0.134513	0.140106	0.150824	0.12064	0.252494	0.141463	0.140307	0.126801	0.198887	0.0893911	0.0787167	0.11403		0.0984553	0.150533
3.16_372.106		C16H20O10	372.106	372.106	-0.3	3.16	30	15	15	0	1.53793	1.10847	0.826726	3.58342	3.21527	2.46959	6.88859	3.33722	4.62654	4.93674	5.8583	6.85819	6.18587	4.25692	4.4247	0.473421	0.720736	0.687423	1.17726	1.63216	1.3531	1.1688	1.39952	1.13505	1.12366	0.866324	1.72783	1.89958	1.44025	2.21744
3.46_372.154				372.154		3.46	30	15	15	0	0.490337	0.213923	0.343319	0.262875	0.186079	0.339668	0.562978	0.240186	0.255406	0.393128	0.244662	0.27968	0.238826	0.42611	0.538987	0.201981	0.265969	0.248318	0.293207	0.196409	0.190271	0.159228	0.0943225	0.533628	0.142187	0.176517	0.187432	0.0966066	0.185935	0.14169
2.6_374.037		C28H6O2	374.037	374.037	-0.22	2.6	30	15	15	0	0.907972	0.748094	1.25997	0.980973	0.755594	0.96855	1.25263	0.988492	0.749201	0.901269	0.920692	0.627131	0.886901	1.12775	0.957805	0.524907	0.489433	0.60219	0.376191	0.710977	0.473214	0.399407	0.351627	0.558665	0.349974	0.469373	0.664354	0.330508	0.562595	0.561182
1.1_374.046				374.046		1.1	30	15	15	0	1.14947	1.67391	1.9836	3.26648	2.46346	1.84167	2.27948	1.81641	1.17365	1.65956	2.38691	2.67152	2.90808	2.17616	1.96782	1.20259	1.54541	1.15409	2.82607	1.47518	1.45929	0.611369	1.11908	1.0766	1.30415	1.0896	1.35008	1.52225	1.30078	0.676126
1.84_374.061				374.061		1.84	30	15	15	0	0.586228	0.245265	0.388833	0.552862	0.381737	0.546851	0.74354	0.450561	0.39472	0.354537	0.439412	0.277759	0.530281	0.802208	0.871124	0.201885	0.31516	0.330471	0.192636	0.176393	0.237889	0.175926	0.159341	0.220768	0.185114	0.250945	0.30293	0.185835	0.332155	0.217792
3.22_374.1				374.1		3.22	30	15	15	0	0.908421	1.01196	0.999942	0.652835	1.24052	0.850605	1.53392	1.23066	0.846502	0.76838	0.833172	0.290364	0.782681	1.76458	1.50892	0.549293	0.462411	0.615303	0.396979	0.951279	0.47195	0.646686	0.341541	1.11813	0.478439	0.37875	0.37344	0.266864	0.672703	0.875892
3.56_374.147				374.147		3.56	29	15	14	0	0.199037	0.133867	0.165587	0.431263	0.205938	0.186422	0.506054	0.3206	0.498493	0.930586	0.654225	0.127098	0.49744	0.20229	0.319915	0.0944705		0.0906562	0.0958778	0.171445	0.128602	0.21415	0.946429	0.454581	0.12138	0.12715	0.133233	0.193703	0.262406	0.20827
4.04_374.194				374.194		4.04	30	15	15	0	0.359381	0.410136	0.436211	0.498399	0.298326	0.291478	0.54686	0.569158	0.36887	0.656409	0.70258	0.357347	0.285515	0.374146	0.310012	0.213504	0.133826	0.317739	0.14609	0.168979	0.121997	0.258314	0.161057	0.380011	0.143791	0.1362	0.25078	0.0900158	0.0809945	0.0886948
4.21_374.266				374.266		4.21	28	15	13	0	0.453561	0.336042	0.185663	0.510962	0.42647	0.361531	0.709874	0.467685	0.508446	0.551142	0.693042	0.378782	0.340378	0.428422	0.298019	0.168382	0.174191	0.159564	0.154186	0.250559	0.153937	0.284912	0.0937639	0.527428	0.105266	0.121839	0.0954242			0.0689202
1.58_375.115				375.115		1.58	30	15	15	0	0.275848	0.262684	0.143417	0.343743	0.378227	0.234053	0.415776	0.328577	0.28706	0.363322	0.45761	0.219962	0.409445	0.374749	0.326585	0.149379	0.255962	0.179572	0.298115	0.331072	0.330616	0.216659	0.16497	0.243315	0.184169	0.19317	0.205565	0.116878	0.19633	0.0837719
1.49_376.022				376.022		1.49	25	12	13	0	0.970482	0.127533		0.129122	1.13636	0.110333	0.930852	0.203333	1.04939	0.210759	0.0890846	0.102045		0.122984		0.0696635	0.296786	0.248401	0.136273	0.384856	0.438323	0.311928	0.0785269	0.192587	0.173324		0.180315		0.0799523	0.121271
1.82_376.059				376.059		1.82	30	15	15	0	3.74433	2.89337	3.1084	6.66284	5.57067	3.73709	6.75559	3.99775	3.06847	2.92152	4.67071	5.03356	3.50307	3.00778	3.21785	1.90733	2.80096	1.89808	4.37324	1.98494	1.98335	1.08865	1.2342	2.24917	1.61412	1.26734	1.24173	1.32291	0.844355	0.762649
3.21_376.114				376.114		3.21	29	14	15	0	0.507108	0.548636	0.560614	0.56285	0.750918	0.580331		3.63046	0.605124	0.623633	0.506617	0.289424	2.45697	0.524966	0.549319	0.310629	0.257099	0.312498	0.287547	0.383477	0.363955	0.214462	0.25515	0.905589	0.217777	0.238145	0.323034	0.244001	0.185543	0.450854
2.18_376.184				376.184		2.18	30	15	15	0	0.249893	0.116301	0.15466	0.232948	0.285905	0.149257	0.461788	0.354664	0.224717	0.279144	0.501673	0.204087	0.272744	0.331317	0.538962	0.0789281	0.12665	0.101541	0.209936	0.134052	0.119796	0.175281	0.10455	0.245417	0.116868	0.142221	0.156205	0.170955	0.171025	0.281179
4.22_376.281				376.281		4.22	38	15	15	8	0.643751	0.454864	0.291005	0.574632	0.564524	0.434539	0.872528	0.674222	0.675349	0.81868	0.767164	0.458188	0.374959	0.499583	0.358548	0.191472	0.277039	0.155702	1.08966	0.263411	0.659726	1.5415	0.901414	2.00642	0.663782	0.411078	0.122936	0.288059	0.280966	0.0947795	0.0575976	0.0417403	0.128717	0.0835615	0.568331	1.36998	0.133921	0.141622
1.22_378.024				378.024		1.22	30	15	15	0	0.93212	0.740103	0.841645	1.06842	1.30893	0.64467	1.73518	1.56998	1.16705	0.962004	1.29733	0.91344	0.514606	0.600647	0.410781	0.68006	0.889551	0.510808	1.30199	1.6436	0.751265	0.685105	0.447863	1.01456	0.567851	0.51733	0.477914	0.0974917	0.105275	0.0808515
2.6_378.053				378.053		2.6	30	15	15	0	0.298749	0.345073	0.457177	0.438965	0.336504	0.399014	0.429011	0.369164	0.256265	0.308099	0.369562	0.291704	0.35779	0.55244	0.38357	0.262733	0.221513	0.274713	0.203837	0.31532	0.197193	0.190922	0.123644	0.224684	0.15968	0.200663	0.305601	0.174508	0.230924	0.194712
3.04_378.11				378.11		3.04	30	15	15	0	0.30575	0.334502	0.150897	0.585591	0.616554	0.309166	0.750758	0.555425	0.363248	0.90287	0.994407	0.529707	0.459443	0.578814	0.724813	0.27652	0.301653	0.224843	0.352025	0.336643	0.34545	0.298949	0.21922	0.376926	0.313585	0.353176	0.260794	0.357878	0.347531	0.332045
2.66_378.113				378.113		2.66	35	15	15	5	0.582359	0.306374	0.203956	0.571294	0.673216	0.348594	0.774428	0.562881	0.559687	0.905682	0.870501	0.530003	0.515684	0.434169	0.526869	0.327149	0.369284	0.287057	0.379729	0.552676	0.362429	0.396142	0.363667	0.791009	0.381184	0.339657	0.212689	0.279638	0.3438	0.390144	0.0559153	0.0561596	0.0610378		0.0645642			0.0479049
1.65_378.115				378.115		1.65	30	15	15	0	0.523447	0.733372	0.639266	0.659319	0.34622	0.97796	1.34023	0.664901	0.808268	0.960198	0.72139	0.676309	0.854407	0.976102	0.678807	0.488315	0.492452	0.556596	0.533419	0.856607	0.589451	0.421194	0.59912	0.821934	0.639147	0.898234	1.04037	0.592123	0.591246	0.804748
1.84_378.116				378.116		1.84	30	15	15	0	2.48212	3.31286	3.13385	3.49376	2.71509	2.6585	5.52794	3.6758	3.47847	4.17427	3.6809	3.56969	2.53707	3.02886	2.14721	1.97647	1.99087	2.62859	2.26674	3.41186	2.00329	2.36549	2.24581	2.88012	1.88995	2.22101	3.01316	1.68341	1.93188	2.52724
1.08_378.158				378.158		1.08	26	7	10	9	0.066568		0.101292			0.0809766	0.0831836	0.126193	0.0897248	0.166965						0.137	0.0909429		0.413819	0.363431	0.209453	0.225929	0.139286	0.429306	0.145382	0.0973393					2.04133	2.25508	1.82408	3.64196	0.802831	1.2643	0.0558419	0.377243
1.01_378.158				378.158		1.01	27	8	10	9	0.0789023		0.128175		0.0775454	0.0938725	0.0946976	0.0903455	0.0792423	0.195687						0.0832866	0.0675786		0.198751	0.41633	0.0731637	0.08708	0.188465	0.081571	0.15866	0.0688437					0.544081	0.646905	0.333476	0.616149	0.155001	0.425389	0.0591681	0.0692051
6.31_378.169				378.169		6.31	40	15	15	10	0.206362	0.173895	0.38647	0.208798	0.254026	0.462328	0.229847	1.52591	0.117206	0.201378	0.584503	0.581047	0.46456	0.312209	0.243617	0.270963	0.124709	0.283281	0.320528	0.103524	0.127059	0.0426696	0.0474133	0.116724	0.754658	0.70839	0.196339	0.211485	0.319706	0.189805	0.0390227	0.0515933	0.0891921	0.195082	0.124686	0.140504	0.374842	0.0944573	0.125363
3.47_378.188				378.188		3.47	30	15	15	0	0.465256	0.324892	0.126495	1.0909	0.752433	0.533731	0.673081	0.457473	0.722148	0.770585	1.7794	0.560669	0.579748	0.585908	0.526822	0.326594	0.363105	0.433009	0.533857	0.488635	0.480272	0.370664	0.19163	0.981748	0.331123	0.289556	0.309606	0.194383	0.409759	0.297584
3.26_378.188				378.188		3.26	30	15	15	0	1.61173	0.902412	0.603329	2.00093	1.82065	1.09842	2.41467	2.33818	1.46829	2.77498	3.44204	1.7472	2.45727	1.54046	1.77487	0.67029	0.767215	0.653483	0.861657	1.21209	0.912609	0.436018	0.331625	1.23641	0.502194	0.488934	0.520406	0.325591	0.58406	0.405324
1.46_380.041				380.041		1.46	30	15	15	0	0.801361	0.402218	0.838497	0.664761	0.530435	0.576262	1.22368	0.934919	0.804877	1.25007	0.665116	0.485181	0.657719	0.783547	0.664888	0.419935	0.614649	0.352379	0.450099	0.516339	0.680888	0.365359	0.274558	0.629468	0.271487	0.346407	0.36021	0.222642	0.274715	0.276107
1.31_380.067				380.067		1.31	30	15	15	0	0.354917	0.478477	0.276039	0.705554	0.383362	0.577623	0.507999	0.467188	0.312232	0.359565	0.449373	0.406507	0.481209	0.665008	0.742226	0.211342	0.256975	0.304469	0.272989	0.302126	0.215848	0.250011	0.269633	0.263205	0.405832	0.395708	0.386579	0.31935	0.525287	0.415422
1.55_380.088		C21H16O7	380.09	380.088	1.6	1.55	29	15	14	0	0.326825	0.279379	0.287184	0.616469	0.542986	0.471721	0.476034	0.432047	0.305865	0.548805	0.702286	0.639671	0.715677	0.50821	0.484627	0.28918	0.325885	0.323994	0.587157	0.356541	0.341957	0.121182	0.205724	0.31524	0.201276	0.183373	0.23913	0.182938	0.179262
2.77_380.089		C21H16O7	380.09	380.089	0.6	2.77	30	15	15	0	0.901947	0.870417	0.601276	2.18246	2.00889	1.11435	2.81615	1.87297	1.20691	1.9847	2.68998	2.12751	2.1123	1.83611	1.78336	0.634948	0.65895	0.57063	0.990852	0.559335	0.572514	0.32848	0.283915	0.727946	0.273542	0.231677	0.343761	0.224542	0.171925	0.204081
2.66_380.09		C21H16O7	380.09	380.09	-0.4	2.66	30	15	15	0	0.268714	0.225924	0.595042	0.368219	0.406035	0.228034	0.480867	0.315167	0.249677	0.598279	0.647459	0.393032	0.459621	0.358242	0.426963	0.259537	0.306137	0.212714	0.367826	0.373246	0.236419	0.176825	0.206048	0.447305	0.251264	0.248322	0.177008	0.199343	0.174945	0.189743
2.83_380.167				380.167		2.83	30	15	15	0	1.75382	1.90806	1.81856	1.39566	1.89747	0.777587	2.81926	2.77869	1.75439	2.13268	2.69157	1.1789	0.794764	0.836965	0.850205	0.856546	0.780378	0.637492	1.13074	2.00778	0.783789	1.07311	0.570437	1.64117	0.37411	0.488365	0.675399	0.43931	0.422281	0.519414
3.32_380.168				380.168		3.32	30	15	15	0	1.07528	0.45347	0.176522	1.57278	1.71688	1.14734	2.83168	1.72826	2.61255	4.41375	3.16146	2.78501	2.44584	2.07147	2.52839	0.494614	0.615826	0.447567	1.06422	0.567841	0.537386	0.471421	0.375505	0.917415	0.47435	0.493234	0.479319	0.310331	0.435669	0.623778
6.08_380.196				380.196		6.08	31	10	15	6	0.106299	0.067721	0.106113			0.0902847	0.130474		0.0701944	0.191588	0.177857	0.0857437			0.115616	0.218047	0.177373	0.155952	0.34556	0.280815	0.220785	0.467237	0.211781	0.784981	0.205709	0.326517	0.209509	0.182376	0.176289	0.100643	0.0387481		0.0439165		0.454881	0.323486	0.276848	0.261944
4.68_380.204				380.204		4.68	23	15	8	0	0.236999	0.241575	0.215693	0.224532	0.396305	0.166326	0.67515	0.231201	0.365784	0.891931	0.595836	0.349862	0.411322	0.24834	0.540573	0.135884	0.213473	0.114261				0.221572		0.199077		0.204991		0.206877		0.289223
5.48_380.216				380.216		5.48	37	14	15	8	0.200232	0.089578	0.340454	0.122316	0.315068	0.0965515	0.583293	0.130786	0.143129	0.433364	0.251162	0.627496	0.180785		0.319812	0.210789	0.339543	0.0967888	0.662671	0.254125	0.272413	0.624348	0.321867	1.2414	0.978548	0.487928	0.105868	0.303623	0.298815	0.160876	0.236912	0.199827	0.157074	0.082644	0.685994	0.64386	0.193052	0.199334
5.12_380.216				380.216		5.12	23	0	15	8																0.163345	0.185186	0.104462	1.43448	0.351176	0.332774	0.543184	0.525949	0.702444	0.461541	0.208787	0.211005	0.0999201	0.167728	0.0594547	0.300644	0.202906	0.134288	0.114248	1.29602	1.13983	0.664796	0.589382
2.37_381.048				381.048		2.37	27	15	12	0	0.825956	0.558463	0.279035	1.46434	1.21878	0.799668	1.87322	0.920506	1.21129	2.1369	2.02659	1.45719	1.08766	1.43038	1.99927	0.304135	0.434718	0.218552	0.38343	0.293647	0.288822	0.12942		0.156915		0.0624519	0.100442		0.0935267	0.0665655
1.94_381.163				381.163		1.94	30	15	15	0	0.575801	0.371036	0.622806	0.582861	0.461552	0.558589	0.900117	1.10404	0.679372	0.734941	0.842738	0.448732	0.502606	0.525554	0.483138	0.252031	0.328077	0.401044	0.29566	0.502428	0.307837	0.448292	0.277681	0.495858	0.241271	0.333807	0.523075	0.31769	0.204588	0.387209
6.43_381.165				381.165		6.43	19	7	10	2		0.242795	0.64273					1.28107		0.25934	0.400981	0.417048	0.361963			0.288412		0.29522				0.0772696	0.355382	0.364509		0.271392	0.236774	0.36597	0.307444	0.163517			0.136614						0.186464
5.07_381.978				381.978		5.07	40	15	15	10	0.344644	0.402882	0.473601	0.559109	0.461116	0.386352	0.46847	0.474954	0.264647	0.355006	0.484592	0.479089	0.499288	0.587797	0.599819	0.327356	0.403154	0.355673	0.637412	0.445924	0.331966	0.230959	0.316479	0.337318	0.330674	0.313022	0.344282	0.361266	0.310005	0.252032	0.189823	0.193281	0.208632	0.412953	0.290728	0.236399	0.234435	0.258324	0.322534
1.35_382.058				382.058		1.35	30	15	15	0	0.482852	0.397939	0.357497	0.531143	0.736898	0.4205	0.925447	0.847538	0.606732	0.650527	0.633707	0.476802	0.556509	0.49461	0.40123	0.355998	0.383852	0.182972	0.546885	0.448624	0.485859	0.348965	0.317385	0.435139	0.376831	0.358949	0.37381	0.228666	0.277131	0.282237
0.51_382.095				382.095		0.51	38	15	15	8	0.40967	1.15402	0.496208	0.450239	0.409625	0.221918	0.904236	0.531295	0.145578	0.833003	0.271719	0.617323	1.91972	2.74049	1.75396	0.446386	0.0499185	0.464628	0.467473	0.525621	0.283715	0.139716	0.0895216	0.10287	0.294057	0.445666	0.780282	1.11367	0.902013	1.00088	0.189671	0.197702	0.0527043	0.439008	0.364517	0.717088		0.28402
3.38_382.183				382.183		3.38	30	15	15	0	0.717565	0.40648	0.247327	1.28002	0.358033	0.56047	1.16562	0.541365	0.569797	0.772444	1.12937	0.598277	0.866576	0.530552	0.769523	0.547839	0.308907	0.133472	0.646456	0.212882	0.454354	0.321177	0.369714	0.640535	0.186944	0.427329	0.254407	0.289686	0.305457	0.722087
3.13_382.183				382.183		3.13	30	15	15	0	0.731948	0.418525	0.255072	1.37431	0.992543	0.653713	1.19956	1.06719	0.444878	1.16757	1.50677	0.571887	0.915845	1.43234	2.11612	0.2847	0.626843	0.253233	0.35577	0.385027	0.398262	0.186333	0.271124	0.472042	0.137294	0.310052	0.485986	0.134225	0.0705449	0.179289
3.07_382.183				382.183		3.07	30	15	15	0	0.140812	0.185927	0.0899135	0.471244	0.271409	0.247895	0.113657	0.153255	0.0927978	0.365542	0.438898	0.109941	0.531693	0.415581	0.558929	0.107657	0.0941077	0.0943912	0.35577	0.145212	0.24732	0.107922	0.17499	0.193354	0.0399366	0.052128	0.217932	0.0931001	0.0705449	0.0779069
2.87_382.184				382.184		2.87	30	15	15	0	5.12241	2.92555	1.59585	9.43897	7.72457	6.58709	11.4865	9.12552	9.15006	18.8564	16.0643	17.4958	14.6914	12.2299	12.5791	2.77811	3.88742	2.23188	5.69421	4.55624	3.92198	2.64481	2.68918	5.06238	2.99143	3.27524	2.79925	2.01604	2.32768	1.94674
5.12_382.194				382.194		5.12	25	0	15	10																0.241739	0.216118	0.136411	1.93597	0.383589	0.314598	0.67084	0.687967	0.654622	0.54655	0.229224	0.263855	0.138034	0.210443	0.0790298	0.333188	0.225573	0.150461	0.133434	1.86775	1.31094	0.828683	0.752053	0.0652172
1.93_383.106				383.106		1.93	33	15	15	3	0.193532	0.126852	0.168249	0.197613	0.236364	0.163919	0.333267	0.29485	0.22166	0.215704	0.271778	0.230031	0.190671	0.18089	0.228673	0.130316	0.155573	0.123657	0.243015	0.194972	0.188382	0.15333	0.155144	0.18282	0.156547	0.153076	0.120029	0.155017	0.173643	0.20142	0.197622	0.243386	0.0497493
2.88_383.122				383.122		2.88	29	14	15	0	0.142685	0.0980227		0.191042	0.265604	0.122287	0.372551	0.226746	0.192527	0.20989	0.328008	0.238791	0.222699	0.213565	0.325727	0.0638254	0.0892576	0.0823464	0.178935	0.124281	0.0980645	0.146563	0.128489	0.201149	0.142966	0.136575	0.163807	0.223163	0.141702	0.147636
3.84_384.142				384.142		3.84	29	14	15	0	0.195712	0.118422	0.166124	0.360698	0.455854	0.144711	0.841295	0.622111	0.356457	0.518928	0.906032	0.18571	0.26661		0.284436	0.0613366	0.105809	0.0884196	0.239845	0.13182	0.143537	0.252639	0.105515	0.205137	0.0645517	0.121094	0.0541168	0.111313	0.109807	0.104219
3.39_384.198				384.198		3.39	26	11	15	0	0.227953	0.160837	0.217819	0.310492	0.293841		0.336881	0.164075	0.33652	0.26079	0.439009		0.231868			0.152857	0.121256	0.340271	1.31809	0.106436	0.169099	0.112841	0.278618	0.187641	0.9649	1.46848	2.12071	1.90154	0.119148	3.57045
2.97_384.198				384.198		2.97	37	14	14	9	0.0996494	0.0800907		0.134153	0.199451	0.100953	0.434372	0.684651	0.158192	0.268459	0.253854	0.154418	0.168502	0.155624	0.133621	0.0949451	0.0825742	0.0783557	0.226204	0.14374	0.0985088	0.0674389	0.0880286	0.152792	0.07176	0.0735321	0.0774706		0.0807384	0.0720788	0.220909	0.265179	0.219646	0.258061	0.0861599	0.0699372	0.0599162	0.0376626
3.34_384.199				384.199		3.34	30	15	15	0	0.883655	0.518308	0.54622	1.12839	1.15851	0.505621	1.14044	0.41946	0.55216	0.929607	0.576377	0.453265	0.809008	0.468453	0.54706	0.302317	0.456008	0.270889	0.599692	0.577099	0.369234	0.320645	0.157114	0.628537	0.23661	0.22138	0.274725	0.159603	0.296678	0.185562
3.93_384.218				384.218		3.93	30	15	15	0	2.93811	0.986696	0.91384	2.32875	3.00416	1.44377	4.65838	4.03785	3.12967	7.97031	5.12055	2.99764	6.10428	2.89587	6.00317	0.722127	1.14669	0.811746	2.56116	0.417901	1.44257	1.37968	1.1114	0.926092	0.916684	0.578289	1.02661	1.03409	1.13734	0.971382
2.8_386.082				386.082		2.8	30	15	15	0	0.707192	0.314419	0.506531	0.989234	0.865903	0.555794	1.17393	0.418756	0.596082	0.732159	0.525446	1.64297	4.813	6.18466	22.6369	0.379442	0.460473	1.37337	0.413071	0.218676	0.322371	1.47778	2.66451	0.269103	0.0839612	0.174154	2.84231	0.628798	0.32121	4.23108
2.25_386.084				386.084		2.25	30	15	15	0	0.148195	0.371136	0.513367	0.341767	0.214199	0.11623	0.356346	0.499379	0.172459	0.347596	0.103579	0.523478	1.14086	1.01069	3.91202	0.148217	0.185989	0.317929	0.215802	0.160412	0.231172	0.335467	0.717272	0.148489	0.19157	0.17626	0.755637	0.175652	0.141267	1.68349
2.76_386.085				386.085		2.76	30	15	15	0	0.340268	0.0749651	0.134849	0.854921	0.585008	0.408235	1.65129	0.0954072	0.519703	0.922312	0.263566	1.64297	4.813	6.14503	22.5608	0.343245	0.140454	1.37337	0.194469	0.317138	0.134294	1.45956	2.57721	0.521809	0.139068	0.111977	2.84231	0.628798	0.238729	4.28292
2.31_386.085				386.085		2.31	30	15	15	0	0.591808	0.389309	0.504316	0.593305	0.45838	0.252535	0.780566	0.463053	0.685646	0.405933	0.455484	0.304701	0.206508	1.02323	3.89788	0.230653	0.198765	0.365147	0.197971	0.349921	0.272861	0.460195	1.55949	0.411358	0.16752	0.202381	0.315297	0.116977	0.131671	1.67993
1.32_386.089				386.089		1.32	30	15	15	0	0.21331	0.129595	0.145115	0.233388	0.409213	0.186329	0.640763	0.548018	0.435218	0.619817	0.842092	0.460047	0.60479	0.395715	0.489128	0.231552	0.1948	0.132257	0.322536	0.318582	0.230289	0.28503	0.407919	0.323262	0.371406	0.399009	0.373186	0.274883	0.384203	0.586792
3.24_386.121				386.121		3.24	30	15	15	0	1.45728	0.826184	0.664667	2.31204	2.32364	1.67929	3.78325	2.69745	2.64264	3.46211	4.48926	4.37583	3.74099	2.89947	3.00482	0.893573	1.18205	1.1567	2.06307	2.19261	1.31561	2.0052	1.39153	2.25007	1.90655	1.65688	2.25625	1.86698	1.53012	1.42476
2.78_386.121				386.121		2.78	30	15	15	0	0.784259	0.930357	0.927749	0.664568	0.721642	0.848287	1.02677	0.874591	0.799348	1.03232	0.883745	0.822936	0.751397	0.613421	0.0778371	0.664375	0.662287	0.637833	0.82127	1.05363	0.626632	0.992091	1.05121	1.16135	0.638886	0.696764	0.920872	0.404331	0.561785	0.910241
1.54_386.141				386.141		1.54	30	15	15	0	0.811589	0.73036	0.828581	1.77249	1.04406	0.793974	1.47535	2.28861	1.34699	2.34182	1.7664	1.71905	1.4441	0.855768	0.511662	0.588658	0.606613	0.513044	1.77606	0.94005	0.760612	0.998444	1.03135	0.96563	0.957563	0.673434	1.40683	0.70248	0.639192	0.383069
3.78_386.157				386.157		3.78	28	13	15	0	0.121679			0.173129	0.157114	0.0974076	0.417773	0.268606	0.183396	0.317969	0.477336	0.121454	0.22062	0.242812	0.3531	0.34236	0.344204	0.178473	0.646314	0.724488	0.0886765	0.0924688	0.707028	0.277348	0.532812	0.785075	0.843087	0.81211	0.0912532	1.35934
3.55_386.157				386.157		3.55	15	0	15	0																0.433124	0.556127	0.339958	1.30685	1.89922	1.09132	1.37395	2.09838	2.16272	0.953097	1.43263	2.14294	1.90704	1.97726	3.54953
2.6_387.977				387.977		2.6	30	15	15	0	0.965886	0.914434	1.3921	1.21038	0.937453	1.0905	1.23173	1.07204	0.739939	0.993103	1.01178	0.749379	1.10663	1.19843	1.22112	0.62177	0.582348	0.698013	0.382944	0.77735	0.457255	0.293062	0.343644	0.427157	0.323995	0.450504	0.627233	0.336502	0.628499	0.441968
2.6_388.055				388.055		2.6	30	15	15	0	0.474347	0.287658	0.569075	0.444479	0.327618	0.446219	0.750146	0.55798	0.480101	0.525119	0.453642	0.269882	0.297629	0.357913	0.380918	0.246083	0.200625	0.241793	0.152769	0.359223	0.217782	0.352249	0.227565	0.407955	0.189323	0.285974	0.324819	0.134728	0.312672	0.320261
1.65_388.079				388.079		1.65	30	15	15	0	0.456991	0.28775	0.274879	0.688894	0.546421	0.355999	0.673783	0.476968	0.59561	0.449271	0.608787	0.428487	0.471196	0.370288	0.35401	0.285982	0.39981	0.323445	0.517865	0.64431	0.426886	0.335556	0.386453	0.619319	0.35209	0.461703	0.309205	0.225125	0.23455	0.263161
2.94_388.136				388.136		2.94	30	15	15	0	0.92454	0.290705	0.418387	0.369395	0.31532	0.520134	0.670674	0.478243	0.460725	0.382396	0.419204	0.282568	0.41814	0.425156	0.633057	0.220176	0.306481	0.323639	0.203197	0.39147	0.307367	0.245655	0.261127	0.539787	0.144303	0.210429	0.268262	0.213478	0.29331	0.318124
2.81_388.136				388.136		2.81	30	15	15	0	1.97566	1.04537	1.31642	1.46027	1.21631	1.61586	2.03946	1.74437	1.61309	1.53342	1.75133	1.30609	1.58936	1.86198	1.31307	0.667188	0.679311	0.913666	0.855644	0.889102	0.694529	0.924332	0.839826	1.29349	0.650273	0.955459	1.72325	0.8725	0.756153	0.940005
2.51_388.136				388.136		2.51	30	15	15	0	2.61147	1.47642	1.81714	1.96678	2.66483	1.38709	3.31713	2.33777	2.10684	2.40161	2.70486	1.4604	1.71056	1.71642	2.1825	1.05378	1.42436	1.20831	1.19956	1.8085	1.36931	1.20866	0.923398	1.9958	0.66781	0.784388	0.835037	0.683131	0.813567	1.27436
2.98_388.172				388.172		2.98	30	15	15	0	0.790398	0.736519	1.04515	1.08186	1.39472	0.770626	2.27632	1.24388	1.37597	1.44974	1.34149	0.887922	1.14055	1.24711	1.36914	0.681968	0.435907	0.975871	0.764408	1.10923	0.651115	0.49723	2.65829	2.33426	0.385971	0.453066	0.679507	0.409829	0.812595	0.703796
5.18_388.293				388.293		5.18	40	15	15	10	0.120042	0.165164	0.209524	0.18921	0.160482	0.237423	0.204236	1.30475	0.0975629	0.16646	0.20642	0.838384	0.230295	0.248272	0.217588	0.238166	0.154883	0.154353	0.25393	0.172008	0.140395	0.086414	0.213511	0.132262	0.15352	0.121955	0.165933	0.161789	0.122716	0.120889	0.116429	0.0868301	0.0945671	0.180619	0.0843388	0.0882568	0.102708	0.0979152	0.117916
1.65_389.017				389.017		1.65	30	15	15	0	1.46239	1.88116	1.70177	2.62675	2.56576	1.91465	2.26734	1.74912	1.1372	1.30649	1.7302	2.11939	2.24782	2.2933	1.69973	1.44802	1.90829	1.92056	2.50944	2.46091	1.50677	0.773228	1.13534	1.35511	1.30252	1.09244	1.12368	1.01361	1.03503	0.822865
4.45_389.825				389.825		4.45	38	13	15	10	0.147536			0.187777	0.133974	0.134355	0.213608	0.202289	0.162617	0.196316	0.247541	0.303683	0.286063	0.314861	0.238125	0.331048	0.290024	0.182154	0.513432	0.689986	0.427288	0.536965	1.14807	0.671216	1.36681	1.26512	0.825891	1.26954	1.76456	0.897838	7.52993	6.34378	5.61521	5.51502	2.811	2.83359	1.05477	1.98855	0.603564
2.6_389.976				389.976		2.6	29	14	15	0	0.787817	0.597141	1.05998	0.876307	0.742082		0.36793	0.890986	0.128642	0.744151	0.634235	0.596327	0.846309	0.956913	0.979604	0.462106	0.414438	0.478852	0.240732	0.494905	0.320233	0.101078	0.142999	0.070662	0.122495	0.11522	0.158884	0.137473	0.180518	0.0783395
2.6_390.002				390.002		2.6	30	15	15	0	0.831473	0.896051	1.38394	1.11315	0.83208	1.11319	1.50411	1.14848	0.804008	0.973407	1.13253	0.736649	1.01128	1.1948	1.22307	0.630635	0.573894	0.715519	0.429554	0.844025	0.53046	0.413755	0.431495	0.628678	0.40123	0.523911	0.729388	0.379534	0.618123	0.628555
1.63_390.128				390.128		1.63	40	15	15	10	0.582485	1.92238	2.43695	2.18321	0.662969	0.869627	0.847586	1.82872	0.782811	1.66743	1.47423	1.29173	1.97759	2.77891	0.96135	1.21419	0.703519	1.04685	2.3216	2.20963	1.07065	1.14807	2.21671	1.35937	1.71426	1.97107	3.21277	2.83733	2.46598	1.07502	1.31705	0.797207	4.58043	5.20556	0.365647	0.518944	0.158748	0.446712	0.626071
3.09_390.188				390.188		3.09	30	15	15	0	0.805195	0.711953	1.12197	1.66408	1.13083	0.866759	1.42936	1.75015	1.03633	1.47755	1.38603	1.15036	1.38781	1.02006	1.1841	0.733088	0.535604	0.783805	1.08662	0.696874	0.667062	0.617088	0.718956	1.2236	0.654635	0.419428	1.19548	0.518322	0.419041	0.344338
2.72_390.199				390.199		2.72	30	15	15	0	0.329063	0.17582	0.177191	0.347591	0.386113	0.201199	0.504915	0.404652	0.328973	0.397147	0.510016	0.249755	0.271829	0.266772	0.413624	0.121858	0.194422	0.167346	0.269663	0.213775	0.14692	0.185962	0.14419	0.418752	0.177154	0.172823	0.167584	0.150854	0.192857	0.23462
1.28_391.096				391.096		1.28	34	15	15	4	0.26635	0.291264	0.202286	0.560341	0.366882	0.374415	0.504246	0.384204	0.206945	0.413964	0.583287	0.591448	0.727545	0.76134	0.779615	0.274457	0.206144	0.280612	0.444081	0.443117	0.369091	0.59548	0.512018	0.543025	0.510267	0.527553	0.531984	0.468307	0.403794	0.591666				0.179326	0.10127	0.105412		0.0694442
3.59_392.11				392.11		3.59	33	15	15	3	0.331187	0.374542	0.366806	0.649434	0.990636	0.284703	1.2231	0.823739	0.635597	0.539307	1.00206	0.263406	0.3794	0.169592	0.296504	0.212618	0.140767	0.138682	0.208364	0.337626	0.243593	0.271239	0.174777	0.409519	0.0733156	0.146762	0.0798862	0.0923512	0.101672	0.334823					0.0411929				0.0442123
3.24_392.115				392.115		3.24	29	15	14	0	0.277121	0.328737	0.32548	0.464704	0.786736	0.252716	0.783055	0.590674	0.468218	0.349474	0.683857	0.276586	0.345706	0.148125	0.199267	0.164571	0.121984	0.0715293	0.147081	0.159902	0.159789	0.198058	0.0940106	0.174415	0.0579615	0.0775518	0.127773		0.0594622	0.252919
3.28_392.127				392.127		3.28	28	13	15	0	0.135465	0.0963191		0.211541	0.176402	0.137459	0.260325	0.0696288	0.152518	0.317974	0.327022	0.207399		0.223924	0.256507	1.08153	1.53602	0.77975	2.19109	1.73762	1.22033	1.32694	1.09574	1.85301	1.43758	1.6745	1.36592	1.55643	1.08849	1.11533
2.76_392.127				392.127		2.76	29	15	14	0	0.222349	0.160059	0.190617	0.236534	0.382501	0.182063	0.326529	0.258065	0.222603	0.351836	0.388202	0.292293	0.180951	0.16434	0.294533	0.126974	0.208767	0.131655	0.25462	0.1679	0.159804	0.110349	0.104826	0.183705	0.149184	0.114431	0.133335	0.0740885	0.13235
2.1_392.131				392.131		2.1	30	15	15	0	1.50638	0.981625	1.40161	1.84711	2.08627	1.48735	2.991	3.24909	2.25488	2.74797	3.03534	2.88705	1.87227	2.16163	1.51713	0.92877	1.09525	0.815167	2.04154	1.19327	1.17167	1.30629	1.46759	1.85503	1.28968	1.52911	1.88608	0.951863	1.23182	0.42761
3.31_392.203				392.203		3.31	30	15	15	0	0.438582	0.204702	0.488415	0.432082	0.397423	0.481729	0.844471	0.620113	0.572681	0.715497	0.767252	0.439688	0.452527	0.342901	0.556239	0.333999	0.302786	0.335745	0.364539	0.330516	0.294982	0.271106	0.276172	0.620397	0.236644	0.124434	0.34882	0.221521	0.15261	0.223903
3.91_392.204				392.204		3.91	30	15	15	0	0.75053	0.591293	0.876864	0.990602	0.546501	0.580091	1.01952	1.17738	0.840849	1.30129	1.30731	0.71588	0.820561	0.709463	0.916478	0.351489	0.268069	0.380379	0.358759	0.280395	0.373036	0.372088	0.282145	0.696916	0.275569	0.227384	0.471997	0.219331	0.209403	0.152185
3.09_393.09				393.09		3.09	30	15	15	0	1.13723	0.343642	0.617867	0.384475	0.446578	0.280255	0.896644	0.649375	0.674073	0.812073	0.660735	0.24714	0.314796	0.323395	0.374884	0.207852	0.163471	0.183386	0.15676	0.252346	0.20971	0.318648	0.157863	0.396546	0.0856556	0.147486	0.218512	0.09306	0.330489	0.352886
1.3_394.084				394.084		1.3	30	15	15	0	0.34064	0.346523	0.360806	0.618542	0.357273	0.44373	0.482124	0.504712	0.300449	0.415671	0.434655	0.398127	0.650954	0.776841	0.496096	0.200177	0.180951	0.274497	0.290637	0.313598	0.145799	0.23724	0.284555	0.251176	0.287606	0.339701	0.284557	0.310047	0.31499	0.216726
2.76_394.104				394.104		2.76	30	15	15	0	0.297736	0.178334	0.178208	0.225424	0.461341	0.243721	0.358148	0.347241	0.316931	0.370621	0.39935	0.260016	0.353356	0.193247	0.176927	0.167052	0.208898	0.0929966	0.2182	0.211324	0.186207	0.233053	0.175947	0.298363	0.187028	0.19168	0.159572	0.117738	0.173287	0.186886
2.14_394.105				394.105		2.14	30	15	15	0	0.229461	0.186877	0.32472	0.20528	0.382108	0.27557	0.506549	0.686138	0.563575	0.494506	0.458385	0.141562	0.466553	0.810828	0.503137	0.159835	0.164826	0.220201	0.154835	0.265078	0.196481	0.179873	0.694853	0.39799	0.135215	0.389107	0.400266	0.2934	0.456187	0.541231
1.2_394.118				394.118		1.2	30	15	15	0	0.549628	0.575054	0.456085	0.534635	0.260852	0.490513	0.266343	0.253386	0.257311	0.2967	0.28432	0.270217	0.301504	0.237633	0.241088	0.280286	0.368084	0.619782	0.261504	0.176489	0.250875	0.255802	0.223027	0.331405	0.218127	0.135666	0.284852	0.205092	0.163601	0.181936
3.7_394.183				394.183		3.7	29	14	15	0	0.265304	0.183122		0.26633	0.337325	0.418229	0.762524	0.4215	0.923013	1.62255	1.04878	0.618068	0.59682	0.506623	1.26233	0.0789598	0.173912	0.098128	0.19621	0.0654272	0.126962	0.0812497	0.0556121	0.138795	0.476175	0.0630833	0.0842913	0.454957	0.0835452	0.429856
3.58_394.183				394.183		3.58	29	14	15	0	0.19207	0.0986099		0.15935	0.228502	0.210118	0.386838	0.45903	0.447572	0.666981	0.642235	0.428156	0.537493	0.268566	0.410161	0.156251	0.130985	0.198139	0.437526	0.332069	0.355484	0.499018	0.406013	0.795659	0.476175	0.665569	0.383771	0.473318	0.622894	0.429655
3.01_394.183				394.183		3.01	30	15	15	0	1.92558	0.857181	0.670215	2.40304	1.85169	1.65314	2.66673	2.07668	2.01259	3.85323	3.22872	2.72485	2.179	2.26605	2.28619	1.06169	1.26264	1.1395	1.80328	1.68104	1.38043	1.24324	1.18484	2.83778	1.25744	1.37204	1.26356	1.10868	1.19176	0.884991
3.66_394.184				394.184		3.66	30	15	15	0	0.318792	0.216463	0.148458	0.1632	0.211266	0.143264	0.301819	0.702553	0.241569	0.369126	0.261123	0.166419	0.240991	0.220312	0.219479	0.0802963	0.208111	0.079467	0.159241	0.134416	0.068276	0.495348	0.0790695	0.199074	0.541794	0.0756282	0.0664167	0.477184	0.661587	0.492525
4.77_395.983				395.983		4.77	40	15	15	10	0.16496	0.206356	0.213387	0.284377	0.184992	0.178666	0.289253	0.216685	0.122127	0.231576	0.226447	0.234892	0.256062	0.317645	0.286887	0.177494	0.154532	0.170465	0.296862	0.273635	0.157348	0.0909095	0.151454	0.23778	0.232709	0.183502	0.145748	0.207425	0.111083	0.0964164	0.121727	0.128374	0.0916067	0.258111	0.105706	0.133489	0.123103	0.114211	0.141812
1.31_396.033				396.033		1.31	30	15	15	0	0.445047	0.689857	0.419968	0.980781	0.614686	0.707224	0.757197	0.56649	0.447331	0.616572	0.730268	0.745562	0.629271	0.894979	0.913292	0.321836	0.444374	0.403823	0.371632	0.462869	0.365858	0.363278	0.364337	0.473793	0.52434	0.581445	0.4826	0.388178	0.632665	0.514798
1.57_396.034				396.034		1.57	34	15	15	4	0.395454	0.413135	0.322296	0.357899	0.412834	0.347827	0.59542	0.376388	0.164599	0.506831	0.475372	0.463583	0.627566	0.72338	1.1068	0.252891	0.157205	0.209011	0.172327	0.319727	0.119342	0.285208	0.192123	0.169103	0.276442	0.366496	0.21767	0.268607	0.408881	0.597421	0.0952363	0.0853043	0.0424716					0.0404493
1.73_396.036				396.036		1.73	34	15	14	5	0.284916	0.451781	0.537384	0.415844	0.46557	0.298831	0.840902	1.14023	0.660828	0.547083	0.520732	0.24871	0.361751	0.638213	0.559834	0.225273	0.257329	0.401263		0.393556	0.275686	0.287021	0.177978	0.388522	0.162387	0.230693	0.299326	0.213528	0.297944	0.414059	0.0964892	0.0773173	0.044891		0.054446			0.0445778
5.96_396.114				396.114		5.96	36	15	15	6	0.720502	0.270705	2.40126	0.419306	0.37236	1.11564	0.635528	2.37773	0.432492	0.930878	2.32239	0.938405	0.913044	0.276194	0.782848	0.29622	0.268963	0.502697	0.660051	0.800538	0.713852	0.391699	0.277772	0.52656	0.183154	0.191099	0.615591	1.59212	0.182728	0.410786	0.50211	0.371891	0.347597	0.603793			0.0775024
2.79_396.163				396.163		2.79	30	15	15	0	0.567391	0.368745	0.357193	0.99808	1.02806	0.598852	1.45988	1.2837	1.05145	1.71962	1.86599	1.4635	1.23706	1.30516	1.12717	0.329387	0.383811	0.269335	1.14699	0.455676	0.622098	0.489337	0.478338	0.730685	0.479409	0.653588	0.65269	0.492535	0.502728	0.410068
5.12_396.189				396.189		5.12	22	0	14	8																0.12255	0.107234	0.0725195	0.844872	0.205905	0.194648	0.35521	0.333564	0.380154	0.30778	0.0989143	0.105052	0.067968	0.111023		0.193784	0.138508	0.0888482	0.0850919	0.647061	0.563339	0.341793	0.342257
3.57_396.198				396.198		3.57	30	15	15	0	1.52143	0.961462	0.686966	0.752771	1.36706	1.55867	2.76752	2.52826	2.05626	2.91022	2.29872	1.87874	1.53713	2.38013	3.6279	0.733658	0.811668	0.455321	1.11505	0.955772	0.858069	0.553733	0.218602	1.2747	0.375196	0.63495	0.507583	0.286033	0.56567	0.276363
3.31_396.199				396.199		3.31	30	15	15	0	2.57685	1.86929	1.14706	3.06995	4.45641	3.56869	8.55234	5.95095	6.50802	12.8938	8.70663	9.46223	7.70929	7.22782	8.30351	1.33822	1.65734	1.00847	2.63782	1.0899	1.85693	0.908888	0.908135	1.88539	1.20235	1.08992	0.955694	0.422674	0.948095	0.797813
3.25_396.199				396.199		3.25	30	15	15	0	0.992428	0.697533	0.627377	2.65393	1.17671	1.38351	3.73922	2.79612	2.5552	4.2362	1.72454	1.50324	3.1345	2.32429	2.49458	0.518543	0.724971	0.506169	1.53572	0.318473	0.821993	0.58987	0.542038	1.43344	0.866514	0.757772	1.30767	0.262251	0.734151	0.594766
4.32_396.234				396.234		4.32	30	15	15	0	0.412564	0.320766	0.197766	0.463773	0.411521	0.265503	0.485346	0.516752	0.367494	0.565239	0.660671	0.328298	0.436903	0.310299	0.34164	0.180959	0.249029	0.220825	0.375943	0.274585	0.203767	0.184199	0.142043	0.373867	0.186993	0.153673	0.168926	0.129708	0.0684678	0.131291
5.36_396.25				396.25		5.36	40	15	15	10	0.310577	0.256495	0.519959	0.463094	0.298026	0.284364	0.397378	4.76992	0.240518	0.279424	0.443373	0.461692	0.425824	0.484784	0.557878	0.261944	0.283683	0.281179	0.420226	0.27091	0.206431	0.169386	0.249734	0.656813	0.302307	0.306113	0.318421	0.281371	0.305429	0.213014	0.523222	0.378913	0.418745	0.315202	0.273833	0.190228	0.38591	0.603318	0.21672
1.44_397.043				397.043		1.44	30	15	15	0	0.176887	0.336026	0.652236	0.645047	0.19731	0.24469	0.476387	0.624069	0.417292	0.684062	0.38556	0.422388	0.320806	0.297934	0.153121	0.280416	0.183338	0.167553	0.271942	0.58593	0.238447	0.306832	0.46517	0.387801	0.266974	0.18344	0.620857	0.268472	0.238447	0.200059
5.88_397.259				397.259		5.88	39	14	15	10	0.495106	0.399734	0.253055	0.265749	1.08812	0.208476	0.107933	0.352016	0.175313	0.123411		0.107647	0.481047	0.189707	0.799025	0.222487	0.21953	0.115317	0.542397	0.215967	0.457064	0.384741	0.391449	0.166356	0.668027	1.69883	0.646879	1.27892	0.518147	0.6719	0.323102	0.296154	0.315594	0.430773	0.640809	0.592495	1.48311	1.28459	3.95919
2.47_398.079		C24H14O6	398.079	398.079	0.04	2.47	30	15	15	0	0.307627	0.320668	0.467696	0.314083	0.332427	0.307239	0.592111	0.350272	0.33017	0.318222	0.425094	0.284604	0.335065	0.454464	0.370337	0.224169	0.217497	0.226227	0.162228	0.291606	0.191056	0.200155	0.192599	0.280011	0.136144	0.138379	0.182616	0.115241	0.169436	0.228177
1.89_398.082				398.082		1.89	30	15	15	0	0.307016	0.314363	0.425707	0.382025	0.373781	0.29795	0.56142	0.47834	0.31568	0.394293	0.458405	0.271533	0.390833	0.331535	0.41452	0.200143	0.228739	0.195345	0.246701	0.292801	0.220232	0.202035	0.192047	0.324471	0.153405	0.142794	0.208346	0.1853	0.244892	0.304087
1.57_398.089				398.089		1.57	29	15	14	0	0.246198	0.131025	0.234799	0.249504	0.311233	0.152098	0.53934	0.346291	0.33376	0.450794	0.494521	0.245483	0.439124	0.474911	0.575743	0.107264	0.214271		0.160791	0.233477	0.176546	0.178666	0.215452	0.225954	0.152739	0.181318	0.200869	0.185877	0.291511	0.437787
3.51_398.161				398.161		3.51	30	15	15	0	0.258411	0.478724	0.559929	0.297423	0.330378	0.193855	0.741824	0.646025	0.540741	0.613876	0.322537	0.477467	0.496816	0.237825	0.210294	0.217075	0.151532	0.170464	0.12244	0.531576	0.261307	0.200935	0.361332	0.388029	0.0561767	0.155047	0.237161	0.130199	0.246647	0.0837953
3.59_398.167				398.167		3.59	30	15	15	0	0.667927	0.516435	0.500439	0.647436	0.403123	0.104818	1.06031	0.88609	0.79161	0.887511	0.675309	0.109808	0.347823	0.165785	0.238595	0.20604	0.26304	0.320688	0.153424	0.426399	0.176341	0.110102	0.397886	0.727828	0.161975	0.0988433	0.201011	0.174225	0.124307	0.145845
2.99_398.178				398.178		2.99	17	0	7	10																						0.0919278	0.13332	0.139955	0.117651	0.0660003	0.0819456			0.0774184	0.143798	0.157888	0.250688	0.306477	0.195685	0.152704	0.124691	0.22963	0.0705885
2.41_400.098				400.098		2.41	28	14	14	0	0.376175	0.0733452		0.222416	0.365878	0.185278	0.390751	0.255292	0.452203	0.441716	0.504579	0.38106	0.46263	0.550708	0.289165	0.109926	0.116898		0.121495	0.0895954	0.132382	0.238304	0.679152	0.288112	0.210392	0.54239	0.605276	0.284819	0.309286	0.176059
2.12_400.098				400.098		2.12	35	15	15	5	0.402964	1.09018	1.17799	0.655229	0.750119	0.925471	1.68473	1.81329	2.31892	1.55047	0.639573	0.30759	0.428893	1.03102	0.573043	0.30335	0.287061	0.283301	0.271037	1.73358	0.860097	0.654907	3.03429	2.51741	0.600904	1.17449	1.57454	0.606281	1.09825	0.689426	0.0968334	0.0652212	0.0511403		0.0417363	0.0323758
1.33_400.119				400.119		1.33	19	14	5	0	0.157985	0.216951		0.186693	0.147054	0.247652	0.351775	0.181813	0.177411	0.20177	0.222662	0.256444	0.287801	0.255235	0.248079	0.0915581		0.152805		0.138988			0.0512381	0.0899703
1.64_400.158				400.158		1.64	30	15	15	0	22.8988	28.3496	32.3204	67.3508	30.3575	26.4952	49.615	80.0022	45.8022	88.8977	73.1316	70.47	71.0947	53.4598	27.7391	18.3415	21.0389	15.3451	65.5363	33.815	26.9864	37.4656	43.9517	41.9292	46.3001	35.7054	66.1375	42.9961	43.7779	18.6765
1.92_400.16				400.16		1.92	28	14	14	0	0.232374	0.101291	0.209332	0.791948	0.323377	0.277231	0.541819	0.606129	0.591745	0.579969	0.543145	0.803088	0.122159		0.222531	0.114775	0.108028		0.417384	0.141772	0.232657	0.360491	0.616203	0.336753	1.01081	0.924296	1.55025	1.05716	2.42976	3.47431
3.65_400.211				400.211		3.65	30	15	15	0	0.643286	0.267287	0.236847	1.20363	1.71865	0.703224	2.39604	1.27698	1.75373	2.16145	2.54278	1.70838	2.03469	1.53203	2.26139	0.179048	0.295393	0.265619	0.766485	0.250138	0.440195	0.388557	0.280712	0.828852	0.326407	0.236837	0.351484	0.364935	0.22441	0.304785
3.32_400.212				400.212		3.32	30	15	15	0	0.606527	0.921551	0.699305	0.755182	1.69197	0.459214	2.04954	1.05521	1.47524	1.16594	1.69862	1.2723	1.10464	1.72078	1.37284	0.328527	0.435508	0.222187	0.909547	0.407907	0.367241	0.407219	0.34079	0.703921	0.377532	0.363576	0.559898	0.687245	0.804986	0.504188
3.27_400.212				400.212		3.27	30	15	15	0	0.574372	0.919657	0.692736	0.562074	1.31838	0.5066	1.62993	0.798951	1.22502	0.862166	1.71264	1.01865	0.599367	1.71771	0.918652	0.212853	0.403523	0.293443	0.616842	0.419766	0.339029	0.571676	0.366192	0.788697	0.436372	0.459059	0.371366	0.33357	0.560548	0.552571
3.2_400.212				400.212		3.2	30	15	15	0	0.684177	0.44368	0.452617	0.75851	1.50083	0.614117	2.03874	1.42673	1.38753	1.34476	2.26603	1.30758	0.850983	0.831442	1.05535	0.432493	0.572596	0.257925	0.838298	0.699121	0.597766	0.578736	0.499175	0.853567	0.544171	0.574939	0.608782	0.522419	0.497172	0.676179
6.17_400.328				400.328		6.17	40	15	15	10	0.117375	0.148265	0.211444	0.201961	0.179487	0.167274	0.205339	0.149901	0.0839918	0.127922	0.158332	0.148893	0.220401	0.247776	0.150564	0.102724	0.153207	0.144324	0.206242	0.235672	0.125514	0.0890289	0.114524	0.1459	0.130134	0.109259	0.130089	0.126149	0.0993329	0.0890326	0.0901062	0.112211	0.0803568	0.219112	0.0885355	0.0848168	0.0860597	0.0838234	0.108492
1.74_401.107				401.107		1.74	20	0	10	10																					0.0518909	0.138271	0.0865277	0.153078	0.122272	0.129782	0.0986529	0.0939027	0.06369	0.032847	0.136131	0.129083	0.154112	0.137379	0.512867	0.76404	0.603424	0.493565	0.0772898
2.12_402.073				402.073		2.12	30	15	15	0	0.241292	1.13216	0.939091	0.616913	0.577929	0.761575	1.08466	0.966965	1.4264	0.74619	0.420489	0.31773	0.45057	1.09696	0.532614	0.23859	0.246898	0.310358	0.188218	1.02455	0.479884	0.163464	1.92486	0.649201	0.136057	0.327811	0.552675	0.243109	0.494775	0.179656
2.41_402.075				402.075		2.41	30	15	15	0	0.383133	0.294924	0.20677	0.658639	0.239659	0.246254	0.92824	0.318687	0.469292	1.10489	0.613506	0.858106	0.937156	1.18662	1.01767	0.261909	0.349768	0.183256	0.265701	0.189976	0.24308	0.278965	0.872863	0.29666	0.23248	0.649545	0.664366	0.445627	0.302978	0.14494
2.58_402.115				402.115		2.58	30	15	15	0	0.393652	0.435149	0.491978	0.403592	0.412071	0.38729	0.486901	0.467764	0.377387	0.449624	0.444136	0.277278	0.241451	0.38227	0.27961	0.239592	0.24349	0.258686	0.213665	0.380986	0.223011	0.236784	0.173528	0.248751	0.129316	0.124842	0.196456	0.112121	0.137658	0.18403
5.96_402.129				402.129		5.96	35	15	15	5	0.566956	0.256602	1.78035	0.239171	0.282295	0.87379	0.446136	0.874609	0.315052	0.710875	1.63336	0.684069	0.681256	0.212963	0.526151	0.221064	0.180893	0.438749	0.492424	0.639015	0.540331	0.280684	0.229403	0.412423	0.125384	0.160842	0.451225	1.20584	0.184891	0.296346	0.361538	0.229452	0.243766	0.351237
3.74_402.152				402.152		3.74	28	13	15	0	0.192998			0.487362	0.431816	0.31332	0.855292	0.397736	0.414828	0.51933	1.16228	0.234237	0.292585	0.224875	0.437761	0.0836847	0.147359	0.101552	0.326564	0.0762431	0.197231	0.312272	0.210677	0.391381	0.235562	0.543536	0.175306	0.249286	0.307431	1.20468
2.9_402.152				402.152		2.9	30	15	15	0	3.14134	2.54027	1.93486	5.12893	4.06539	3.76039	6.02887	4.88112	4.41126	5.91233	5.81162	6.22502	4.3333	4.93385	4.53073	2.1267	2.17499	1.80172	3.5382	2.35547	2.38626	1.85836	2.02115	2.76804	1.81215	2.06715	2.12777	1.31011	1.49291	1.54274
1.09_403				403		1.09	30	15	15	0	0.95595	1.30466	1.36995	2.44825	1.68888	1.29938	1.68444	1.43039	0.839583	1.2292	1.50832	1.72639	1.87814	1.36122	1.29132	0.909474	0.949038	0.841416	1.94443	1.06292	0.983968	0.51878	0.83889	0.809543	1.01942	0.723817	0.98658	1.20352	0.810247	0.420037
1.39_404.003				404.003		1.39	30	15	15	0	0.347979	0.252089	0.140397	0.444847	0.468146	0.28813	0.419248	0.351497	0.318182	0.399495	0.634365	0.425759	0.44408	0.472028	0.425644	0.168697	0.294423	0.268599	0.275316	0.289074	0.233932	0.213647	0.231024	0.27805	0.233224	0.276187	0.274151	0.233737	0.22082	0.229493
1.65_404.057				404.057		1.65	30	15	15	0	0.304115	0.628325	0.519734	0.762819	0.577167	0.519805	0.491382	0.628468	0.425864	0.492281	0.766055	0.444207	0.840021	1.02884	0.58684	0.35247	0.483295	0.497527	0.390321	0.464402	0.278928	0.15538	0.17441	0.218698	0.174458	0.141236	0.183408	0.0458294	0.0939582	0.133388
3.75_404.059				404.059		3.75	40	15	15	10	0.745553	0.897926	1.15776	1.23006	1.03651	1.03351	0.91684	0.977924	0.489098	0.630902	0.984603	1.4217	1.3481	1.59536	1.39202	0.81658	0.942026	0.856384	1.4888	0.892545	0.774812	0.534254	0.773379	0.892455	0.818347	0.701606	0.681421	0.877945	0.731512	0.542058	0.512288	0.517352	0.475208	1.0534	0.580753	0.512439	0.571879	0.562464	0.725972
2.61_404.072				404.072		2.61	34	15	15	4	3.33781	3.11189	4.96208	4.12856	3.22342	3.99835	5.41879	4.19129	3.03529	3.9046	3.89219	2.77188	3.60005	4.32454	4.43371	2.39259	2.20665	2.61567	1.49168	3.38271	2.27507	2.31256	1.96344	2.97416	1.79976	2.3219	3.07639	1.74583	3.04588	2.72716	0.0802064	0.0848529	0.0518219					0.0660429
1.68_404.091				404.091		1.68	33	15	15	3	0.519243	0.675684	0.728861	0.678032	0.705431	0.468476	0.911224	0.641022	0.411381	0.458452	0.750807	0.679244	0.708723	1.1711	1.02456	0.791665	0.582694	0.441109	0.704182	0.644158	0.500332	0.276446	0.54603	0.536112	0.833089	0.661429	0.408602	0.344376	0.309434	0.28185	0.0664995	0.0885948	0.0741424
3.7_404.113				404.113		3.7	30	15	15	0	0.514668	0.364764	0.284149	0.842127	0.846986	0.612813	1.40908	1.53015	1.43143	1.47283	1.59957	0.516951	0.830586	0.939195	0.962383	0.238739	0.220255	0.18971	0.408692	0.642294	0.418665	0.845784	0.649982	1.78518	0.577112	0.756878	0.678043	0.565023	0.426242	1.00332
2.31_404.131				404.131		2.31	30	15	15	0	1.34962	1.4733	1.27446	1.26129	1.16987	1.40373	1.68244	1.59056	1.52632	1.66647	1.49995	1.11177	0.929462	1.125	0.739796	0.625936	0.731912	0.782619	0.700268	1.31726	0.629594	1.05471	0.688708	1.21451	0.625981	0.716659	1.01697	0.627089	0.532827	0.715883
2.52_404.132				404.132		2.52	31	15	13	3	0.988125	0.386316	0.252904	0.431748	0.561254	0.277428	0.551602	0.393675	0.795213	0.299129	0.510327	0.271507	0.457754	0.35333	0.184333	0.377943	0.445373	0.256842	0.212964	0.283073	0.406759	0.363341	0.622409	0.404606	0.311915			0.216215	0.322499	0.191953					0.0554313	0.043869		0.0678213
3.47_404.166				404.166		3.47	30	15	15	0	0.559391	0.25649	0.369748	0.492818	0.631611	0.481909	0.921781	0.71987	0.462994	0.598912	0.880638	0.438015	0.769319	0.595548	0.73072	0.238967	0.321122	0.24551	0.350726	0.424074	0.560991	0.25355	0.290829	0.645806	0.194462	0.226722	0.347428	0.352136	0.349889	0.536886
3.16_404.167				404.167		3.16	30	15	15	0	0.505229	0.385311	0.366083	0.541248	0.630656	0.429711	0.790903	0.354982	0.656705	0.672503	0.337966	0.49956	0.672088	0.343144	0.67056	0.277014	0.329279	0.21602	0.420951	0.311616	0.320729	0.341326	0.164462	0.385645	0.191232	0.267573	0.321331	0.273438	0.30246	0.0701897
3.07_404.168				404.168		3.07	30	15	15	0	1.27721	0.865823	0.68497	2.28807	1.82914	1.29013	2.64547	2.19539	2.16336	3.66409	3.79578	2.88676	3.18936	2.56735	2.90483	0.572198	0.76445	0.615884	1.4804	1.02236	0.861179	1.16515	1.00976	2.35117	1.38532	1.44058	1.33386	1.43166	1.45066	1.74265
1.82_405.011				405.011		1.82	30	15	15	0	3.18724	2.4366	2.61617	5.59946	4.56597	3.03555	5.52039	3.52385	2.51665	2.54395	3.76221	4.03998	3.00385	2.66285	2.67559	1.8409	2.39392	1.64482	3.48032	1.74445	1.68364	1.03017	1.19768	2.04137	1.4597	1.11588	1.19822	1.12868	0.788218	0.709658
0.84_405.136				405.136		0.84	20	0	11	9																0.147414	0.11138		0.797895	0.703185	0.471315	0.421244	0.461859	0.787409	0.106428	0.114106	0.109345				2.0554	1.81949	4.34723	4.34844	1.20181	1.65295	0.210619	0.655301
0.73_406.035				406.035		0.73	33	15	15	3	4.46741	1.73186	2.50347	1.82562	2.6659	1.3145	3.92944	1.05498	1.45666	0.610598	0.961463	0.777367	1.7477	2.07795	2.66425	1.20462	1.96698	0.763961	0.484134	0.873419	0.397706	0.119928	0.354087	0.110455	0.216705	0.20059	0.283615	0.306248	0.74903	0.313966	0.0963743	0.0989605				0.051893
2.6_406.048		C25H10O6	406.048	406.048	-0.26	2.6	30	15	15	0	0.71546	0.802767	1.18926	0.995777	0.758655	0.976144	1.10863	0.954398	0.636631	0.857052	0.881717	0.704926	0.94102	1.19099	1.11893	0.600523	0.62955	0.680593	0.493598	0.832338	0.506278	0.397074	0.424073	0.58086	0.489475	0.503914	0.67248	0.451173	0.675734	0.467037
1.68_406.069				406.069		1.68	30	15	15	0	0.838195	1.09816	1.63637	1.41362	1.5562	1.40738	1.77751	1.32564	0.347746	0.986335	1.62831	1.35533	1.45538	1.42955	1.23348	0.757502	1.28669	0.73862	1.32873	1.52204	0.939059	0.518112	0.792654	1.08801	0.753226	0.607828	0.560513	0.416083	0.523076	0.422714
3.42_406.09				406.09		3.42	30	15	15	0	0.740422	0.894551	0.94669	1.02722	0.871931	1.30147	1.68855	1.85772	1.42916	1.39051	1.12119	0.745434	0.906131	0.784296	0.649628	0.622807	0.548426	0.626877	0.468316	1.0424	0.897683	0.865233	0.604565	1.30453	0.534185	0.654694	1.19239	0.589122	0.639813	0.868973
1.6_406.099				406.099		1.6	30	15	15	0	0.319303	0.228566	0.19181	0.32998	0.273755	0.255171	0.447962	0.344243	0.304425	0.38374	0.328728	0.196064	0.339037	0.432576	0.545232	0.170047	0.241128	0.145406	0.155634	0.169136	0.277328	0.239435	0.182509	0.191033	0.138023	0.223053	0.300718	0.126498	0.275894	0.437815
1.54_406.102				406.102		1.54	30	15	15	0	0.396285	0.189098	0.206338	0.348953	0.244003	0.252007	0.391087	0.253947	0.266068	0.351619	0.314877	0.218447	0.383465	0.429295	0.532007	0.128425	0.277604	0.134406	0.309609	0.308584	0.388335	0.220669	0.215014	0.208922	0.214658	0.228529	0.33396	0.160587	0.258828	0.3545
1.4_406.121				406.121		1.4	36	13	15	8	0.16567	0.0675746	0.105352	0.305555	0.21723	0.162122	0.381575	0.419642	0.331942	0.541783	0.266524	0.262965	0.218385			0.0997956	0.119398	0.0968141	0.190686	0.206044	0.124503	0.289467	0.157621	0.234186	0.210734	0.178849	0.230405	0.141482	0.140008	0.139747	0.0633712	0.0365481	0.290392	0.451067		0.0451638		0.0556209	0.127542
2.39_406.147				406.147		2.39	30	15	15	0	1.13093	0.665326	1.08374	2.14625	1.78286	1.39184	3.5931	2.62385	2.10283	2.84563	3.24318	3.85685	2.61993	3.09918	2.58117	0.684953	1.03457	0.663421	1.95955	0.907441	1.04903	0.975135	0.90026	1.73669	1.29918	1.21525	1.44896	1.06247	1.13855	0.744163
3.28_406.178				406.178		3.28	30	15	15	0	0.157862	0.392397	0.333134	0.614159	0.475317	0.319927	0.517484	0.288432	0.308797	0.314878	0.305741	0.282004	0.277767	0.377298	0.234803	0.239046	0.195674	0.130195	0.14237	0.216059	0.103345	0.407627	0.235395	0.244625	0.167312	0.163112	0.0974476	0.205294	0.0935318	0.131749
3.61_406.182				406.182		3.61	30	15	15	0	0.439058	0.467839	0.211494	0.798261	0.468875	0.314664	0.761773	0.696214	0.561043	2.36289	1.99989	1.14147	0.629666	1.00784	1.08773	0.286948	0.24037	0.263192	0.445916	0.268372	0.497486	0.307482	0.356324	0.802603	0.666062	0.710538	0.338099	0.269681	0.319026	0.498007
3.57_406.184				406.184		3.57	30	15	15	0	0.557789	0.324565	0.0754397	0.850832	0.439308	0.219144	0.740596	0.570666	0.554527	2.30571	2.00349	1.10847	1.25318	1.13117	1.07066	0.174908	0.176053	0.181555	0.606412	0.526444	0.533462	0.33532	0.266032	0.635048	0.662167	0.70456	0.21461	0.701233	0.356873	0.394165
3.03_407.064				407.064		3.03	30	15	15	0	0.250951	0.19952	0.134642	0.350538	0.350995	0.198225	0.53611	0.35202	0.203189	0.476856	0.666327	0.320787	0.307136	0.388509	0.540256	0.175795	0.199185	0.162007	0.274095	0.244689	0.203084	0.185073	0.16402	0.330087	0.195273	0.250557	0.149901	0.249738	0.221384	0.200599
0.73_408.012				408.012		0.73	29	15	14	0	1.75836	1.01369	1.32666	0.892403	1.14388	0.672396	1.35897	0.378177	0.540302	0.256003	0.468538	0.379137	0.780959	1.02618	1.062	0.652756	1.09199	0.43751	0.228992	0.537085	0.234119	0.0805153	0.148961		0.0898298	0.0835021	0.125759	0.137267	0.321875	0.0963088
1.72_408.076				408.076		1.72	30	15	15	0	0.326981	0.35237	0.313701	0.516851	0.398162	0.445655	0.575327	0.483887	0.494779	0.494256	0.544808	0.525483	0.468897	0.389305	0.310538	0.208731	0.344123	0.30502	0.356891	0.308796	0.254309	0.263756	0.217821	0.236366	0.314864	0.185271	0.284664	0.201411	0.237782	0.24352
2.36_408.084				408.084		2.36	30	15	15	0	0.597834	0.868833	1.21691	0.66157	0.621557	0.823738	1.37605	1.01954	1.03653	0.45993	0.791391	0.346047	0.592601	0.637938	0.493498	0.39718	0.346135	0.541196	0.189544	0.313122	0.324067	0.459057	0.320542	0.52742	0.234517	0.296354	0.260268	0.156201	0.507066	0.828525
2.76_408.099				408.099		2.76	30	15	15	0	0.201958	0.178363	0.132759	0.275919	0.430323	0.143739	0.31064	0.224602	0.23055	0.28681	0.374452	0.207422	0.216321	0.192861	0.237584	0.115164	0.162774	0.116078	0.235253	0.209917	0.168425	0.144167	0.103742	0.197958	0.176193	0.148763	0.138086	0.0974446	0.110821	0.166063
3.14_408.105				408.105		3.14	30	15	15	0	0.254377	0.38189	0.333698	0.373748	0.354224	0.458074	0.700404	0.511007	0.396307	0.465336	0.266	0.17125	0.265945	0.151976	0.181669	0.189882	0.178173	0.295176	0.172214	0.302494	0.241088	0.219796	0.141574	0.41847	0.189689	0.08406	0.19384	0.139498	0.107733	0.164224
3.58_408.199				408.199		3.58	30	15	15	0	5.84026	4.37018	3.87853	5.00103	3.93652	2.89786	7.69308	6.42736	6.37903	6.83567	7.30576	3.18631	2.7773	2.10819	2.92601	1.72987	2.47128	3.22202	2.3098	3.12497	1.81182	2.73552	1.73016	7.82149	1.51186	1.16089	2.23997	1.4227	1.05358	1.47576
3.52_408.199				408.199		3.52	30	15	15	0	2.28719	2.17847	1.92181	2.28029	1.98465	1.21883	3.21906	2.80808	2.65685	2.98578	3.47494	1.66948	1.3476	1.12285	1.22781	0.780304	1.03902	1.37626	0.927664	1.41375	0.785466	0.99262	0.758509	3.10551	0.519622	0.504515	0.933442	0.636429	0.521877	0.724638
3.2_408.199				408.199		3.2	30	15	15	0	0.547688	0.252852	0.20572	0.718562	0.733353	0.589882	1.15081	1.16029	0.921941	2.19564	2.00316	1.49645	1.11912	1.17546	1.13461	0.248387	0.383545	0.220295	0.559154	0.711533	0.449934	0.448712	0.42344	1.18211	0.691935	0.671144	0.465695	0.632832	0.526419	0.450708
2.93_408.199				408.199		2.93	23	11	12	0	0.811502	0.585962	1.39454	1.37025		0.963952	1.323	1.67729	1.0073			1.15297	1.24146	1.08016		0.629253	0.464831	0.719455	0.739039		0.549149	0.619987	0.569232	0.882238	0.483289		0.96602	0.672373		0.307819
2.76_409.043				409.043		2.76	30	15	15	0	0.66297	0.659994	0.539083	1.58456	1.45263	0.76989	2.04481	1.36265	0.875562	1.28038	1.90218	1.39783	1.43556	1.40373	1.08672	0.450824	0.473879	0.450475	0.698274	0.473881	0.421993	0.233817	0.161076	0.577535	0.216061	0.193638	0.217457	0.19993	0.129151	0.164884
2.66_409.043				409.043		2.66	30	15	15	0	0.273482	0.207996	0.539769	0.329301	0.336384	0.223158	0.410221	0.253684	0.233348	0.4463	0.486636	0.359968	0.35386	0.357146	0.318364	0.224913	0.280925	0.2009	0.260467	0.305656	0.238435	0.13811	0.186537	0.371938	0.186667	0.199539	0.15462	0.156478	0.14602	0.138222
1.68_410.051				410.051		1.68	30	15	15	0	1.39919	1.10132	1.68663	1.79486	1.66086	1.49654	3.08595	2.34048	1.89733	3.07652	2.06476	1.52864	2.41167	2.1729	2.19712	1.02229	1.19816	0.854264	1.22422	1.2272	1.41937	0.977156	0.880021	1.52885	0.743398	0.767438	1.0913	0.666558	0.876002	0.960108
3.61_410.066				410.066		3.61	30	15	15	0	0.866215	0.793593	0.877366	0.87099	0.537336	0.313289	1.14003	0.926825	0.72034	0.891168	0.725539	0.56259	0.667917	0.622017	0.831417	0.323295	0.577724	0.286019	0.423117	0.639412	0.229879	0.310137	0.158127	0.727401	0.201963	0.182439	0.239597	0.143587	0.172064	0.200423
3.65_410.138				410.138		3.65	25	14	11	0	0.210369	0.134025		0.422171	0.336622	0.163251	0.797032	0.49203	0.410051	0.730711	0.98397	0.570146	0.622483	0.501599	0.654173		0.0784221	0.0682706	0.2255	0.0930465		0.147032	0.0991528	0.224663	0.0997855	0.151632	0.13785	0.163815
3.95_410.214		C18H34O10	410.215	410.214	1.2	3.95	30	15	15	0	0.308077	0.226427	0.220046	0.792312	0.187471	0.50552	1.1336	0.855669	0.894611	0.591709	1.10016	0.675575	0.336606	0.850486	0.659263	0.329451	0.110391	0.103031	0.156301	0.121182	0.269838	0.23857	0.0576055	0.40446	0.23953	0.100247	0.0870352	0.195015	0.0854196	0.116882
3.7_410.215		C18H34O10	410.215	410.215	0.2	3.7	30	15	15	0	4.47819	2.62561	2.07802	7.23886	6.01733	4.9512	12.9008	9.27073	8.68396	16.9581	13.906	9.33436	8.46808	8.38113	9.36558	1.67705	1.74579	1.30735	2.91626	2.32319	2.64711	1.39438	1.34105	2.56851	1.34898	1.29759	1.2818	0.984546	1.19521	1.03325
1.56_412.067				412.067		1.56	30	15	15	0	0.290187	0.17911	0.22663	0.307393	0.287524	0.201296	0.577365	0.3963	0.335825	0.416196	0.321564	0.272249	0.270793	0.350073	0.282731	0.124901	0.303644	0.16268	0.219063	0.219432	0.286731	0.172471	0.171522	0.327117	0.225953	0.237375	0.33232	0.14351	0.160213	0.161732
2.22_412.096				412.096		2.22	28	14	14	0	0.297649	0.0886025		0.185295	0.381318	0.13687	0.299727	0.288819	0.252399	0.391569	0.432621	0.21209	0.22533	0.211997	0.214327	0.117039	0.169196	0.145104	0.159959	0.118943	0.174065	0.140073	0.0898507	0.269857	0.0985661	0.103601	0.105514		0.0589522	0.109628
2.59_412.133				412.133		2.59	39	15	15	9	0.207985	0.170321	0.231782	0.225518	0.226009	0.159502	0.324118	0.239845	0.188395	0.238842	0.295209	0.208017	0.213718	0.199811	0.217377	0.173477	0.189726	0.14808	0.300281	0.251346	0.217656	0.275101	0.208415	0.316793	0.233013	0.204882	0.210013	0.16868	0.149528	0.198055	0.326345	0.311834	0.353351	0.317252	0.134636	0.139485	0.0549188	0.127539
6.08_412.203				412.203		6.08	27	5	15	7	0.0568141						0.116624	0.0712264		0.114473	0.174973					0.188968	0.155189	0.099002	0.387634	0.34217	0.217177	0.352395	0.20842	0.48424	0.285649	0.301928	0.132286	0.150486	0.0959808	0.0871134	0.0619872	0.0623929	0.0302116		0.495983	0.311692	0.246009	0.229495
3.65_412.214				412.214		3.65	30	15	15	0	0.169454	0.0997258	0.0944342	0.248607	0.283622	0.157165	0.451372	0.278662	0.29502	0.561402	0.482974	0.309105	0.308803	0.28011	0.36953	1.32938	1.84293	1.44586	2.55423	1.51473	1.36167	2.24074	2.276	3.87259	1.95064	4.42129	1.40609	1.49085	2.32776	2.63977
2.4_412.996				412.996		2.4	29	15	14	0	0.233763	0.117793	0.110834	0.340725	0.35091	0.191867	0.537712	0.412607	0.348708	0.490163	0.653315	0.832557	0.640502	0.542575	0.552441		0.0870301	0.0809341	0.209027	0.0961553	0.120205	0.127059	0.133585	0.196472	0.16707	0.207479	0.169614	0.193506	0.121256	0.129339
2.18_413.058				413.058		2.18	27	3	15	9							0.123146			0.0700103	0.104473					0.149783	0.12448	0.102781	0.252756	0.169683	0.137619	0.115983	0.102661	0.196451	0.154387	0.109141	0.109965	0.0787688	0.0946419	0.110088	0.224441	0.20823	0.134008	0.150578	0.252699	0.228709	0.0892078	0.205923
1.59_414.111				414.111		1.59	21	0	11	10																			0.0987509	0.0662774	0.0794401	0.105417	0.0396822	0.101331	0.147425	0.108733	0.0501486		0.0756412	0.131504	0.36737	0.386964	0.398897	0.410883	0.353752	0.32475	0.151552	0.311174	0.0639748
3.68_414.152		C19H26O10	414.153	414.152	0.6	3.68	18	3	15	0							0.14866		0.0768166		0.133668					0.99203	1.39162	1.05388	5.7106	4.03454	2.77622	10.7926	8.95585	13.0141	9.51267	10.9723	6.57216	9.3453	6.74327	12.7306
2.69_414.173				414.173		2.69	30	15	15	0	0.715188	0.187029	0.14115	0.842344	0.785687	0.615308	0.978666	0.766263	0.912312	1.63056	1.17229	1.41135	0.9876	1.04016	1.37357	0.274941	0.470883	0.302637	0.559941	0.434096	0.490836	0.236262	0.328733	0.473729	0.286345	0.278475	0.207123	0.172588	0.167377	0.166707
2.58_414.173				414.173		2.58	30	15	15	0	4.55361	1.55642	1.01904	4.73258	3.80438	3.35061	4.50697	4.05763	3.8781	6.64224	5.59042	6.36406	4.26836	5.44913	5.33122	1.95362	2.78672	1.90661	3.90236	2.37562	2.30251	1.43926	2.02796	3.02331	1.82727	1.94369	1.92822	1.18087	1.01202	1.09757
2.44_414.173				414.173		2.44	30	15	15	0	0.406315	0.188227	0.209797	0.481152	0.404881	0.40627	0.602293	0.419983	0.523757	0.773703	0.700267	0.560374	0.462756	0.476596	0.599992	0.20013	0.269251	0.24222	0.266454	0.328505	0.237537	0.219361	0.258733	0.38081	0.18467	0.20691	0.197699	0.150444	0.155423	0.184184
2.19_414.173				414.173		2.19	30	15	15	0	1.26982	0.83036	0.988409	1.80227	1.46579	1.27822	2.20292	2.42105	2.33718	3.35529	3.09835	2.32362	1.9948	1.6215	1.51975	0.762934	1.13576	0.804317	1.25481	1.36365	0.94157	1.19581	1.07948	1.73176	1.08286	1.10437	1.20489	0.877804	1.10577	0.759087
2.09_414.173				414.173		2.09	30	15	15	0	0.299473	0.247541	0.312169	0.461511	0.287801	0.293343	0.552769	0.392657	0.511319	0.582904	0.659743	0.351368	0.433775	0.532686	0.263865	0.160486	0.220487	0.151573	0.187131	0.293392	0.223126	0.305562	0.318633	0.300121	0.236339	0.287549	0.402193	0.226446	0.239119	0.286557
2.8_415.033				415.033		2.8	27	15	12	0	0.437943	0.347043	0.381873	0.656461	0.496782	0.361815	0.66075	0.286323	0.358254	0.37168	0.473429	0.276523	0.312452	0.466059	0.805578	0.221994	0.302304	0.19313	0.253817	0.207147	0.197485	0.086176	0.0795236	0.139045		0.109094			0.228267	0.118188
3.43_415.975				415.975		3.43	30	15	15	0	0.733901	0.461097	0.659213	0.620909	0.426193	1.03621	1.68512	0.571707	0.795705	1.68043	1.20757	0.369025	0.641195	1.00762	1.19797	0.499668	0.366843	0.29401	0.257913	0.644669	0.27729	0.482165	0.180554	0.450458	0.19705	0.347561	0.461091	0.181912	0.326092	0.285158
1.61_416.055				416.055		1.61	30	15	15	0	0.379744	0.569358	1.04235	0.564948	0.474797	0.449464	0.596984	0.550574	0.374624	0.435871	0.588256	0.291887	0.536037	0.563325	0.477241	0.348699	0.445636	0.404383	0.367142	0.486712	0.370142	0.236972	0.310571	0.322726	0.142661	0.271324	0.268102	0.168615	0.325705	0.179975
1.58_416.056				416.056		1.58	30	15	15	0	0.1608	0.158079	1.27226	0.359701	0.225917	0.697397	0.727986	0.796223	0.498361	0.609139	0.278934	0.286134	0.371876	0.395993	0.541359	0.466946	0.140154	0.56841	0.562621	0.731512	0.541168	0.0887197	0.406786	0.134711	0.175196	0.19527	0.161107	0.170326	0.462799	0.23153
1.31_416.059				416.059		1.31	30	15	15	0	0.198616	0.267839	0.225312	0.408148	0.262195	0.349879	0.433061	0.253457	0.201541	0.282324	0.306305	0.30682	0.338996	0.47115	0.468949	0.119974	0.187592	0.202694	0.217123	0.192536	0.185103	0.184826	0.190247	0.198589	0.267161	0.261166	0.279116	0.187223	0.371267	0.303758
1.53_416.091				416.091		1.53	30	15	15	0	0.33787	0.300729	0.392236	0.469639	0.438265	0.389914	0.615833	0.474204	0.330597	0.416535	0.472007	0.421827	0.452154	0.4239	0.496272	0.251884	0.30481	0.154509	0.439513	0.244666	0.317584	0.204791	0.287834	0.431906	0.332094	0.332609	0.406862	0.313552	0.281979	0.320028
1.41_416.151				416.151		1.41	30	15	15	0	2.45512	2.31899	2.58219	5.66732	4.15802	2.49237	5.49823	6.93152	4.1019	7.20817	6.21059	5.74864	5.07622	2.18606	2.00092	1.5374	2.04655	2.01027	5.51548	2.52143	2.39613	2.61223	2.31781	3.16734	2.81385	2.49886	3.25235	2.05042	2.45728	1.62623
1.3_416.153				416.153		1.3	30	15	15	0	0.951605	0.88243	0.578847	1.24914	1.12268	1.39976	1.14456	1.73085	0.913436	1.07598	1.38911	1.33261	1.48687	1.26317	1.537	0.537689	0.756168	1.26761	0.693949	0.965741	0.650085	1.07669	0.835725	1.24521	1.01486	0.905303	1.18621	1.01333	0.962988	0.783277
3.56_416.168				416.168		3.56	14	0	14	0																0.0936792	0.124678		0.412036	0.633041	0.254162	0.492707	0.529261	1.38346	0.672229	1.00349	0.348407	0.590047	0.734794	0.660119
3.05_416.168				416.168		3.05	30	15	15	0	4.08963	3.07358	2.86692	8.19935	7.17318	5.63294	11.4592	7.60475	7.8779	9.81735	10.4466	9.67887	9.20942	7.91118	8.82954	2.58576	3.01436	2.16598	5.14776	3.64756	4.05522	2.75673	2.44824	5.05997	2.66958	2.61818	2.84934	2.47301	2.48561	2.66966
3.72_416.203				416.203		3.72	30	15	15	0	0.369996	0.312145	0.119678	0.524147	0.443166	0.344522	0.469748	0.574022	0.285407	0.790709	1.09196	0.355399	0.479133	0.403347	0.451483	0.1984	0.177425	0.216772	0.248701	0.241912	0.236421	0.236249	0.3225	0.657217	0.21966	0.303963	0.301533	0.221657	0.300996	0.462808
3.62_416.203				416.203		3.62	30	15	15	0	0.879783	0.486445	0.342666	1.51242	0.990861	0.781585	1.29983	1.69647	1.23408	1.63146	1.95725	0.894132	1.17599	1.03524	1.15965	0.348655	0.423783	0.48673	0.640875	0.549192	0.472065	0.536064	0.86423	0.775764	0.431299	0.646795	0.540933	0.480636	0.494114	0.651985
5.71_416.328				416.328		5.71	40	15	15	10	0.150693	0.183571	0.227752	0.21889	0.237536	0.235379	0.240165	0.822007	0.116214	0.1583	0.22883	0.828195	0.237508	0.332301	0.240599	0.259903	0.148196	0.192157	0.311177	0.182463	0.15623	0.103771	0.191579	0.202287	0.166853	0.144653	0.189037	0.163423	0.128151	0.113568	0.103375	0.0900545	0.11537	0.218836	0.101814	0.0923581	0.102134	0.123746	0.135322
1.21_417.011				417.011		1.21	27	12	15	0	0.13968	0.157701		0.261481	0.165297	0.272428	0.173536			0.130505	0.129387	0.204478	0.293573	0.266971	0.287973	0.208079	0.149364	0.190146	0.207249	0.22008	0.225767	0.26718	0.496032	0.246276	0.352409	0.994329	0.417069	0.598368	0.935185	1.99276
1.67_417.147				417.147		1.67	30	15	15	0	0.193693	0.838005	1.25824	0.324391	0.173251	0.182589	0.240434	0.283258	0.28395	0.442177	0.36238	0.26918	0.283605	0.776014	0.327619	0.504632	0.143777	0.49431	0.382172	0.794282	0.175394	0.320361	0.293431	0.334328	0.294824	0.510279	0.331929	0.743613	0.663146	0.248471
1.63_417.147				417.147		1.63	30	15	15	0	0.327515	0.838005	1.25822	0.689063	0.213823	0.392219	0.243623	0.456923	0.275914	0.44944	0.440446	0.283295	0.46607	0.775011	0.215232	0.504632	0.257506	0.496021	0.72058	0.794282	0.343251	0.455149	0.388131	0.437032	0.516863	0.512343	0.729219	0.757269	0.665368	0.242819
1.53_418.068				418.068		1.53	30	15	15	0	0.222471	0.257066	0.321101	0.696158	0.533818	0.519969	0.574042	0.518449	0.351	0.563057	0.421402	0.354005	0.387785	0.541369	0.614817	0.272818	0.403358	0.191172	0.393318	0.484906	0.321103	0.265657	0.314058	0.425617	0.193835	0.287487	0.405589	0.387166	0.285496	0.316284
2.33_418.11				418.11		2.33	30	15	15	0	0.283216	0.143717	0.156398	0.24041	0.351639	0.197218	0.402545	0.331078	0.283048	0.281977	0.441859	0.298412	0.228617	0.21149	0.202858	0.137636	0.183273	0.115313	0.215353	0.161744	0.217265	0.165642	0.256192	0.220181	0.127936	0.141223	0.179095	0.112561	0.126205	0.111051
2.75_418.147				418.147		2.75	30	15	15	0	1.74403	0.627033	0.678365	0.960048	1.18424	0.699589	1.09688	0.888793	1.70644	0.838879	1.26806	0.684206	1.40625	0.922943	0.589787	0.744794	1.23698	0.573291	0.573737	0.581408	1.16456	0.869634	2.97003	1.16726	1.1052	0.431825	0.592027	0.548032	0.861483	0.473663
2.73_418.147				418.147		2.73	30	15	15	0	2.42173	0.509958	1.33191	1.6153	1.93003	1.28709	0.868328	1.48142	2.40613	0.740204	0.722901	1.4371	2.12177	0.665307	0.214683	0.307819	0.319678	0.329477	0.336856	0.624225	1.35122	1.33727	3.41842	1.57811	1.14162	0.360586	0.437096	0.918923	0.397304	0.723789
2.87_418.157				418.157		2.87	30	15	15	0	3.54393	1.10022	0.829065	3.88507	3.66523	2.70885	6.33717	5.19091	4.81073	8.17724	7.4617	6.10564	5.34067	4.5108	4.84362	1.25783	1.49956	1.08183	2.33071	1.75313	1.49861	1.44073	1.39735	2.67509	1.47372	1.43987	1.39596	0.868205	1.17205	1.18374
4.08_418.219				418.219		4.08	28	15	13	0	0.423568	0.167356	0.382102	0.481932	0.314094	0.329183	0.635193	0.409993	0.37756	0.811066	0.567692	0.279627	0.509086	0.474266	0.645298	0.171968	0.0911296	0.197808	0.183586	0.084524	0.165903	0.125211	0.0914294	0.339166	0.0958934	0.0861765	0.150056			0.0660743
2.6_420.037				420.037		2.6	30	15	15	0	0.944394	0.966965	1.66747	1.08955	0.949551	1.20953	1.68726	1.23703	0.893104	1.10021	1.15208	0.779444	0.962061	1.22606	1.27461	0.580633	0.536455	0.649947	0.419574	0.839897	0.49736	0.48231	0.401745	0.658316	0.402084	0.535146	0.75429	0.388832	0.734932	0.715099
1.39_420.048				420.048		1.39	30	15	15	0	0.503414	0.300599	0.239826	0.57561	0.705527	0.416641	0.722167	0.516649	0.456086	0.505035	0.783116	0.636421	0.455753	0.543168	0.481633	0.233782	0.365854	0.355999	0.41933	0.375909	0.311992	0.324106	0.302433	0.428836	0.347379	0.340759	0.374694	0.288933	0.262747	0.307071
1.85_420.067				420.067		1.85	30	15	15	0	1.14352	0.623367	1.04464	1.22717	0.855906	1.95142	1.25573	0.791004	0.951205	0.878464	0.726832	0.704515	1.39814	2.72872	2.61331	0.574354	0.645663	0.875903	0.420894	0.510457	0.641151	0.558907	0.499281	0.621555	0.478987	0.74914	0.948829	0.423088	0.871241	0.661865
1.31_420.087				420.087		1.31	30	15	15	0	0.616476	0.286805	0.153273	0.664335	0.609603	0.576672	0.701243	0.546236	0.534181	0.982557	0.975976	0.300301	0.32155	0.322042	0.254253	0.236579	0.18687	0.203135	0.299123	0.338568	0.221352	0.212586	0.120147	0.291104	0.149099	0.171832	0.157874	0.112937	0.122339	0.0855557
1.85_420.125				420.125		1.85	30	15	15	0	0.340872	0.177671	0.210782	0.34001	0.400974	0.278937	0.444165	0.298869	0.267973	0.289385	0.407746	0.310959	0.280884	0.268398	0.268375	0.166308	0.258231	0.175015	0.172194	0.258111	0.213837	0.163536	0.171772	0.244136	0.142387	0.157362	0.17588	0.137082	0.152602	0.154238
2.87_420.158				420.158		2.87	30	15	15	0	1.19366	0.331051	0.193105	1.18932	1.2454	0.951361	2.0893	1.68066	1.67836	3.07116	2.3957	2.3987	1.89184	1.5688	1.6196	0.444293	0.472308	0.289278	0.790128	0.655121	0.532604	0.521347	0.434259	0.752408	0.457257	0.615698	0.462601	0.336113	0.219938	0.44559
4.2_420.161				420.161		4.2	29	14	15	0	0.129545	0.16847		0.18971	0.165022	0.146059	0.329541	0.129468	0.187294	0.35474	0.340878	0.269232	0.341405	0.36118	0.484569	0.625188	0.845316	0.467445	0.917592	0.735936	0.489271	0.554487	0.49101	0.816798	0.977948	0.983365	0.795047	1.28855	0.674422	0.631296
4.17_420.198				420.198		4.17	30	15	15	0	0.726394	0.578496	1.37793	1.22504	0.564686	0.709864	1.33782	0.962809	0.718957	0.858109	1.48397	0.579767	0.70107	0.678421	1.03966	0.473826	0.267659	0.659671	0.304854	0.336022	0.289745	0.446789	0.422099	0.753857	0.281543	0.169315	0.501957	0.195907	0.147301	0.165904
0.73_422.005				422.005		0.73	34	15	15	4	5.78254	2.74327	3.45837	1.78225	2.62701	1.55883	3.19782	0.975669	1.68948	0.548774	0.92611	0.727405	1.29011	1.69741	1.76155	1.91766	2.87599	1.16013	0.614625	1.34526	0.460737	0.170345	0.38208	0.119057	0.258782	0.160326	0.239856	0.234748	0.676971	0.242093	0.239865	0.307804	0.0994164			0.0846068
1.85_422.044				422.044		1.85	30	15	15	0	0.414206	0.214851	0.509453	0.463083	0.347506	0.500359	0.509419	0.227801	0.272745	0.299251	0.30571	0.364625	0.634943	0.944753	0.884382	0.232626	0.290727	0.294343	0.184756	0.191446	0.187706	0.149101	0.124457	0.201547	0.171773	0.217704	0.302364	0.142065	0.392456	0.188306
1.15_422.141				422.141		1.15	30	15	15	0	1.38335	1.17311	1.49369	1.23563	1.85281	1.12083	2.26188	2.06214	1.48182	1.31248	1.83858	1.35115	0.992858	0.958537	0.839273	0.7039	0.893191	0.780798	1.02703	1.11282	1.07812	0.919875	0.754559	0.968708	0.595131	0.874371	0.860464	0.744542	0.824079	1.43745
2.9_422.178				422.178		2.9	39	15	15	9	1.36466	0.931463	1.17331	2.0864	1.78478	1.17668	2.1215	1.57814	1.68291	1.7307	2.18713	1.7894	1.33339	1.07174	1.94096	0.953054	0.872244	0.821419	1.08744	0.666129	0.845267	1.16984	0.855024	1.09062	0.905575	0.640885	0.885356	0.842002	0.584961	0.568577	0.18456	0.181016	0.168785	0.101714	0.0773351	0.140101	0.0595805	0.0722718
3.98_422.214				422.214		3.98	29	14	15	0	0.366168	0.19267		0.609549	0.362856	0.109341	0.747395	0.686899	0.232131	0.664679	0.481445	0.315797	0.339042	0.330959	0.320399	0.286214	0.201729	0.2875	0.900245	0.44236	0.279909	0.877682	0.769797	1.55833	1.1936	1.46665	1.35574	1.06158	1.19958	2.71855
3.86_422.214				422.214		3.86	30	15	15	0	0.432089	0.197874	0.115599	0.492332	0.178959	0.322689	0.422932	0.520789	0.550502	1.029	0.42618	0.303595	0.408488	0.234927	0.251265	0.13992	0.215937	0.0647201	0.376794	0.10876	0.0987498	0.0634245	0.16961	0.246201	0.127045	1.43782	0.122589	1.00486	0.157393	2.70593
3.98_422.215				422.215		3.98	30	15	15	0	0.397873	0.348015	0.211007	0.72904	0.158382	0.322222	0.715729	0.960989	0.817379	1.00119	0.602334	0.443101	0.356826	0.534184	0.526227	0.525995	0.22163	0.301897	0.929208	0.566866	0.35533	0.88822	0.809112	1.64514	1.20702	1.43858	1.50205	1.14257	1.28141	2.70593
2.6_424.058				424.058		2.6	30	15	15	0	0.659623	0.778717	0.971634	0.98913	0.750001	0.95783	1.11068	0.862672	0.567397	0.850327	0.860357	0.586543	0.874682	1.07529	1.0854	0.613001	0.601419	0.639907	0.636263	0.942891	0.486269	0.433978	0.529427	0.688113	0.550009	0.686222	0.774115	0.737133	0.77247	0.604807
1.72_424.157				424.157		1.72	30	15	15	0	0.190489	0.145276	0.10335	0.229627	0.213276	0.179178	0.278983	0.237982	0.257095	0.299312	0.353597	0.24627	0.236141	0.293018	0.202028	0.107391	0.165278	0.109774	0.178206	0.220705	0.144938	0.120949	0.166481	0.20851	0.129346	0.172369	0.174032	0.114629	0.165966	0.129512
[truncated: 1,005 more rows]
[truncated: 1 more columns]
