# Supplementary material for: Regulation of pectin remodeling and ectomycorrhiza development by cell wall localized proanthocyanidins in hybrid aspen roots
Source: Research Square preprint supplement (doi:10.21203/rs.3.rs-6966375/v1), 2025-07-04
Supplement: Supplementary file 2 [file 328a4d9c9ea0dff5ca9a1952.xlsx]

## Sheet: Table S8
Table S8: Numeric data on ectomycorrhiza (ECM) formation (% of all root tips per plant) in MYB115 and MYB165 overexpressor hybrid aspen lines compared to the wild type.
Lines	Ectomycorrhizae (ECM)	Non-ECM	Total number of lateral roots per plant	%ECM
WT (grown alongside MYB115 OE)	16	28	44	36.3636
WT (grown alongside MYB115 OE)	27	30	57	47.3684
WT (grown alongside MYB115 OE)	14	21	35	40
WT (grown alongside MYB115 OE)	18	9	27	66.6667
WT (grown alongside MYB115 OE)	19	27	46	41.3043
WT (grown alongside MYB115 OE)	18	26	44	40.9091
WT (grown alongside MYB115 OE)	14	31	45	31.1111
WT (grown alongside MYB115 OE)	24	54	78	30.7692
WT (grown alongside MYB115 OE)	3	18	21	14.2857
WT (grown alongside MYB115 OE)	12	20	32	37.5
MYB115_L4	8	20	28	28.5714
MYB115_L4	7	58	65	10.7692
MYB115_L4	11	46	57	19.2982
MYB115_L4	11	47	58	18.9655
MYB115_L4	32	85	117	27.3504
MYB115_L4	19	38	57	33.3333
MYB115_L4	28	72	100	28
MYB115_L4	27	57	84	32.1429
MYB115_L5	25	46	71	35.2113
MYB115_L5	7	27	34	20.5882
MYB115_L5	6	31	37	16.2162
MYB115_L5	12	37	49	24.4898
MYB115_L5	17	34	51	33.3333
MYB115_L5	23	59	82	28.0488
MYB115_L5	4	12	16	25
MYB115_L5	12	45	57	21.0526
MYB115_L5	6	20	26	23.0769
MYB115_L5	6	37	43	13.9535
MYB115_L5	8	32	40	20
MYB115_L5	10	24	34	29.4118
MYB115_L5	17	44	61	27.8689
MYB115_L5	13	48	61	21.3115
MYB115_L5	17	24	41	41.4634
MYB115_L5	12	47	59	20.339
MYB115_L5	17	43	60	28.3333
MYB115_L5	17	38	55	30.9091
WT (grown alongside MYB165 OE)	64	45	109	58.7156
WT (grown alongside MYB165 OE)	41	61	102	40.1961
WT (grown alongside MYB165 OE)	25	25	50	50
WT (grown alongside MYB165 OE)	45	90	135	33.3333
WT (grown alongside MYB165 OE)	49	74	123	39.8374
MYB165_B1	87	44	131	66.4122
MYB165_B1	80	36	116	68.9655
MYB165_B1	60	48	108	55.5556
MYB165_B1	66	55	121	54.5455
MYB165_B1	94	51	145	64.8276
MYB165_C2	97	49	146	66.4384
MYB165_C2	103	37	140	73.5714
MYB165_C2	68	28	96	70.8333
MYB165_C2	115	82	197	58.3756
MYB165_C2	76	51	127	59.8425
MYB165_C2	69	58	127	54.3307
