# Supplementary material for: Regulation of pectin remodeling and ectomycorrhiza development by cell wall localized proanthocyanidins in hybrid aspen roots
Source: Research Square preprint supplement (doi:10.21203/rs.3.rs-6966375/v1), 2025-07-04
Supplement: Supplementary file 3 [file 58af24d1f15d62b6bb4c9466.xlsx]

## Sheet: S1_colorimetric_PA_assay
Supplementary Table S1. The concentration proanthocyanidins (PA) in the roots of Populus tremula × P. tremuloides plants after contact with Laccaria bicolor. Total PA level was determined with acid-butanol assay as a sum of soluble PA fraction and the cell wall bound PA fraction after the extraction of the soluble ones using Procyanidin B2 as a standard. The effect of time and ECM (ectomycorrhiza…
Time	Treatment	Mean Total PA mg/g DW	SE Total PA mg/g DW	Mean Soluble PA mg/g DW	SE Soluble PA mg/g DW	Mean Bound PA mg/g DW	SE Bound PA mg/gDW	Mean % Soluble PA	SE % Soluble PA	Mean % Bound PA	SE % Bound PA
3	C	328.031	71.8522	130.469	37.9146	197.561	51.5913	40.0735	10.2362	59.9265	10.2362
7	C	333.312	40.9239	101.273	22.3685	232.04	29.6003	30.0007	5.41717	69.9993	5.41717
14	C	441.779	35.6805	157.665	32.4386	284.114	18.7331	35.1651	4.7657	64.8349	4.7657
21	C	307.561	51.762	117.112	29.2318	190.449	29.344	37.6128	5.18849	62.3872	5.18849
28	C	284.789	65.5867	97.998	18.4139	186.791	56.2404	35.7554	5.90292	64.2446	5.90292
3	ECM	251.5	38.2909	58.5737	26.3439	192.927	12.496	20.8372	8.05955	79.1628	8.05955
7	ECM	177.734	27.3683	35.6199	12.9277	142.114	14.5175	18.6198	4.61639	81.3802	4.61639
14	ECM	163.261	12.4014	36.6903	2.64377	126.571	10.4495	22.5296	1.11389	77.4704	1.11389
21	ECM	150.486	7.83628	29.5416	5.38231	120.945	4.55156	19.4322	2.67923	80.5678	2.67923
28	ECM	197.414	38.6375	66.8683	9.18955	130.546	31.0146	35.3404	4.46266	64.6596	4.46266
Two-way ANOVA
	Treatment	Time (day)	Treatment × Time interaction	Treatment(F.val)	Treatment(raw.p)	Treatment(adj.p)	Time(F.val)	Time(raw.p)	Time(adj.p)	Interaction(F.val)	Interaction(raw.p)	Interaction(adj.p)
Total PA mg/g DW	**	NS	NS	34.034	1.0448e-05	5.224e-05	1.0054	0.42803	0.59714	1.7176	0.18562	0.53804
Soluble PA mg/g DW	**	NS	NS	26.207	5.2278e-05	0.0001307	0.52822	0.71631	0.71631	0.81541	0.53027	0.53804
Bound PA mg/g DW	**	NS	NS	13.017	0.0017557	0.0029262	1.036	0.41323	0.59714	1.5235	0.23337	0.53804
Relative Soluble PA (%)	**	NS	NS	9.8974	0.0050848	0.0050848	0.90997	0.47713	0.59714	0.80531	0.53621	0.53804
Relative Bound PA (%)	**	NS	NS	10.528	0.0040602	0.0050752	0.90888	0.47771	0.59714	0.80221	0.53804	0.53804
t-test 3 d
		Levene's Test for Equality of Variances		t-test for Equality of Means
		F	Sig.	t	df	Significance		Mean Difference	Std. Error Difference	95% Confidence Interval of the Difference
						One-Sided p	Two-Sided p			Lower	Upper
BoundPA	Equal variances assumed	4.4181	0.103428	-0.170868	4	0.436311	0.872623	-0.0222784	0.130384	-0.384281	0.339725
	Equal variances not assumed			-0.170868	2.21014	0.439355	0.87871	-0.0222784	0.130384	-0.535136	0.490579
SolublePA	Equal variances assumed	2.69011	0.176316	1.34269	4	0.125253	0.250506	0.466309	0.347296	-0.497938	1.43056
	Equal variances not assumed			1.34269	2.89809	0.137426	0.274851	0.466309	0.347296	-0.661256	1.59388
TotalPA	Equal variances assumed	0.353909	0.583929	0.944192	4	0.199267	0.398534	0.107531	0.113887	-0.20867	0.423732
	Equal variances not assumed			0.944192	3.83012	0.200368	0.400736	0.107531	0.113887	-0.214278	0.429341
BoundPA_relative	Equal variances assumed	0.760539	0.43238	-1.47131	4	0.107587	0.215174	-0.12981	0.0882274	-0.374768	0.115149
	Equal variances not assumed			-1.47131	3.15324	0.116659	0.233318	-0.12981	0.0882274	-0.403024	0.143405
SolublePA_relative	Equal variances assumed	2.58272	0.183313	1.33375	4	0.126582	0.253164	0.358778	0.269	-0.388085	1.10564
	Equal variances not assumed			1.33375	2.93461	0.138176	0.276352	0.358778	0.269	-0.508193	1.22575
t-test 7 d
		Levene's Test for Equality of Variances		t-test for Equality of Means
		F	Sig.	t	df	Significance		Mean Difference	Std. Error Difference	95% Confidence Interval of the Difference
						One-Sided p	Two-Sided p			Lower	Upper
BoundPA	Equal variances assumed	0.131996	0.734758	2.9955	4	0.0200598	0.0401195	0.210971	0.0704293	0.0154281	0.406514
	Equal variances not assumed			2.9955	3.91738	0.0206002	0.0412004	0.210971	0.0704293	0.0137909	0.408152
SolublePA	Equal variances assumed	1.03041	0.367471	2.25345	4	0.0436553	0.0873105	0.501844	0.2227	-0.11647	1.12016
	Equal variances not assumed			2.25345	3.23248	0.051598	0.103196	0.501844	0.2227	-0.178905	1.18259
TotalPA	Equal variances assumed	0.327922	0.597536	3.15762	4	0.0171312	0.0342623	0.277667	0.0879356	0.0335187	0.521815
	Equal variances not assumed			3.15762	3.7059	0.0190447	0.0380894	0.277667	0.0879356	0.0256841	0.52965
BoundPA_relative	Equal variances assumed	0.319525	0.602092	-1.58812	4	0.093727	0.187454	-0.0666958	0.0419966	-0.183297	0.0499055
	Equal variances not assumed			-1.58812	3.62601	0.0973458	0.194692	-0.0666958	0.0419966	-0.188197	0.0548052
SolublePA_relative	Equal variances assumed	0.834486	0.41266	1.54046	4	0.0991474	0.198295	0.224177	0.145526	-0.179868	0.628221
	Equal variances not assumed			1.54046	3.44943	0.104676	0.209352	0.224177	0.145526	-0.206618	0.654971
t-test 14 d
		Levene's Test for Equality of Variances		t-test for Equality of Means
		F	Sig.	t	df	Significance		Mean Difference	Std. Error Difference	95% Confidence Interval of the Difference
						One-Sided p	Two-Sided p			Lower	Upper
BoundPA	Equal variances assumed	0.377301	0.572268	7.88226	4	0.000700322	0.00140064	0.35213	0.0446737	0.228096	0.476164
	Equal variances not assumed			7.88226	3.84586	0.000822918	0.00164584	0.35213	0.0446737	0.22611	0.478149
SolublePA	Equal variances assumed	4.63164	0.0977484	6.89886	4	0.00115745	0.0023149	0.618657	0.0896753	0.369679	0.867636
	Equal variances not assumed			6.89886	2.58849	0.00493681	0.00987361	0.618657	0.0896753	0.305805	0.931509
TotalPA	Equal variances assumed	0.0147379	0.909229	8.97677	4	0.000426127	0.000852253	0.43183	0.0481053	0.298269	0.565392
	Equal variances not assumed			8.97677	3.95396	0.000449445	0.000898891	0.43183	0.0481053	0.297653	0.566008
BoundPA_relative	Equal variances assumed	8.02536	0.0472057	-2.36496	4	0.0386219	0.0772438	-0.0797006	0.0337006	-0.173268	0.0138672
	Equal variances not assumed			-2.36496	2.14421	0.0666275	0.133255	-0.0797006	0.0337006	-0.215746	0.0563452
SolublePA_relative	Equal variances assumed	3.76785	0.124221	3.10008	4	0.0181092	0.0362183	0.186827	0.0602651	0.0195039	0.354149
	Equal variances not assumed			3.10008	2.54195	0.0331638	0.0663276	0.186827	0.0602651	-0.0260778	0.399731
t-test 21 d
		Levene's Test for Equality of Variances		t-test for Equality of Means
		F	Sig.	t	df	Significance		Mean Difference	Std. Error Difference	95% Confidence Interval of the Difference
						One-Sided p	Two-Sided p			Lower	Upper
BoundPA	Equal variances assumed	5.07042	0.0874747	2.54439	4	0.0318417	0.0636834	0.186554	0.0733198	-0.0170142	0.390122
	Equal variances not assumed			2.54439	2.21268	0.0570175	0.114035	0.186554	0.0733198	-0.101567	0.474675
SolublePA	Equal variances assumed	0.317947	0.602957	4.51952	4	0.0053311	0.0106622	0.585221	0.129487	0.225707	0.944735
	Equal variances not assumed			4.51952	3.58917	0.00682782	0.0136556	0.585221	0.129487	0.208881	0.961561
TotalPA	Equal variances assumed	3.94317	0.118024	4.06986	4	0.00761233	0.0152247	0.299996	0.0737116	0.0953399	0.504652
	Equal variances not assumed			4.06986	2.42572	0.0198113	0.0396227	0.299996	0.0737116	0.0306388	0.569353
BoundPA_relative	Equal variances assumed	4.43925	0.102843	-2.9989	4	0.0199927	0.0399854	-0.113442	0.0378278	-0.218469	-0.00841493
	Equal variances not assumed			-2.9989	2.68888	0.0331465	0.0662929	-0.113442	0.0378278	-0.242104	0.0152203
SolublePA_relative	Equal variances assumed	0.157637	0.711615	3.29111	4	0.015092	0.030184	0.285225	0.0866653	0.0446036	0.525847
	Equal variances not assumed			3.29111	3.92417	0.0155257	0.0310514	0.285225	0.0866653	0.0427587	0.527691
t-test 28 d
		Levene's Test for Equality of Variances		t-test for Equality of Means
		F	Sig.	t	df	Significance		Mean Difference	Std. Error Difference	95% Confidence Interval of the Difference
						One-Sided p	Two-Sided p			Lower	Upper
BoundPA	Equal variances assumed	0.00667997	0.938787	0.87365	4	0.215811	0.431623	0.151257	0.173132	-0.329435	0.631948
	Equal variances not assumed			0.87365	3.99792	0.215823	0.431647	0.151257	0.173132	-0.329533	0.632047
SolublePA	Equal variances assumed	1.22539	0.330392	1.437	4	0.112041	0.224082	0.155997	0.108558	-0.145408	0.457402
	Equal variances not assumed			1.437	3.38993	0.1181	0.2362	0.155997	0.108558	-0.168054	0.480048
TotalPA	Equal variances assumed	0.0103352	0.923917	1.12558	4	0.161653	0.323307	0.155754	0.138376	-0.22844	0.539948
	Equal variances not assumed			1.12558	3.99352	0.161701	0.323401	0.155754	0.138376	-0.228686	0.540194
BoundPA_relative	Equal variances assumed	0.36599	0.577841	-0.0874951	4	0.467242	0.934483	-0.00449733	0.0514009	-0.147209	0.138215
	Equal variances not assumed			-0.0874951	3.69326	0.467407	0.934814	-0.00449733	0.0514009	-0.152007	0.143013
SolublePA_relative	Equal variances assumed	0.198766	0.678787	0.00273425	4	0.498975	0.997949	0.000243121	0.0889169	-0.24663	0.247116
	Equal variances not assumed			0.00273425	3.74199	0.498979	0.997958	0.000243121	0.0889169	-0.25349	0.253976
