# Supplementary material for: Regulation of pectin remodeling and ectomycorrhiza development by cell wall localized proanthocyanidins in hybrid aspen roots
Source: Research Square preprint supplement (doi:10.21203/rs.3.rs-6966375/v1), 2025-07-04
Supplement: Supplementary file 4 [file 63ca08fb589b379ccdf31324.xlsx]

## Sheet: Table S9
Table S9: Log₂-transformed relative expression values to reference genes from RT-qPCR analysis of fungal symbiosis marker genes in free-living Laccaria bicolor mycelium and during its interaction with PA-altered transgenic poplar lines or wild type trees.
Target	Line	Normalised expression	Log2 relative expression	Cor SEM	Mean Cq	Cq SEM
PME1	WT/ECM	13.2973	3.73307	0.35974	29.16	0.03864
PME1	WT/ECM	10.1212	3.33931	0.87985	31.28	0.20951
PME1	WT/ECM	3.98406	1.99424	0.10849	31.17	0.07069
PME1	WT/ECM	6.39638	2.67726	0.14407	29.17	0.07289
PME1	WT/ECM	7.02233	2.81195	0.39991	30.37	0.1943
PME1	MYB115_L5/ECM	8.74036	3.12769	0.80727	32.34	0.0403
PME1	MYB115_L5/ECM	8.51794	3.0905	0.40077	30.89	0.1245
PME1	MYB115_L5/ECM	14.4971	3.8577	2.20292	31.84	0.53664
PME1	MYB115_L5/ECM	5.88382	2.55675	0.23243	34.96	0.13978
PME1	MYB115_L5/ECM	6.82279	2.77036	0.31755	30.09	0.08662
PME1	MYB115_L4/ECM	8.48217	3.08443	0.34309	32.06	0.05528
PME1	MYB115_L4/ECM	4.3864	2.13304	0.49204	34.37	0.33123
PME1	MYB115_L4/ECM	9.30389	3.21783	1.32992	32.75	0.28123
PME1	MYB115_L4/ECM	7.19595	2.84719	0.16239	30.7	0.03472
PME1	MYB115_L4/ECM	7.56138	2.91865	0.90277	36.02	0.41726
PME1	Free-living mycelia	1.26876	0.343419	0.04608	33.35	0.07651
PME1	Free-living mycelia	1.41918	0.505058	0.03804	33.86	0.07843
PME1	Free-living mycelia	1.01938	0.027692	0.02541	30.43	0.0811
PME1	Free-living mycelia	1.17402	0.231457	0.031	30.56	0.0829
PME1	Free-living mycelia	1	0	0.03586	31.13	0.12072
PF6.2	WT/ECM	26.9318	4.75124	0.23746	23.26	0.06825
PF6.2	WT/ECM	21.2355	4.40841	0.41064	25.33	0.0913
PF6.2	WT/ECM	15.0584	3.91249	0.20427	24.37	0.15797
PF6.2	WT/ECM	23.0396	4.52604	0.19018	22.45	0.09887
PF6.2	WT/ECM	22.1578	4.46974	0.2052	23.83	0.10296
PF6.2	MYB115_L5/ECM	24.7968	4.63208	0.64557	25.96	0.04664
PF6.2	MYB115_L5/ECM	20.1285	4.33117	0.19542	24.77	0.05148
PF6.2	MYB115_L5/ECM	35.3068	5.14187	0.24126	25.68	0.07001
PF6.2	MYB115_L5/ECM	16.1704	4.01528	0.06703	28.62	0.0514
PF6.2	MYB115_L5/ECM	17.8806	4.16032	0.20003	23.82	0.01297
PF6.2	MYB115_L4/ECM	15.6865	3.97145	0.16476	26.3	0.00561
PF6.2	MYB115_L4/ECM	10.5925	3.40497	0.19538	28.22	0.07451
PF6.2	MYB115_L4/ECM	25.6178	4.67907	0.85745	26.41	0.01815
PF6.2	MYB115_L4/ECM	19.6287	4.29489	0.117	24.37	0.02128
PF6.2	MYB115_L4/ECM	33.5937	5.07012	0.3125	28.99	0.0924
PF6.2	Free-living mycelia	5.59724	2.48472	0.0485	26.33	0.03474
PF6.2	Free-living mycelia	1	0	0.00601	29.49	0.05354
PF6.2	Free-living mycelia	7.82694	2.96845	0.07455	22.61	0.11489
PF6.2	Free-living mycelia	6.77038	2.75924	0.02624	23.16	0.02217
PF6.2	Free-living mycelia	7.50437	2.90773	0.0469	23.34	0.0679
Target	Line	Normalised expression	Log2 relative expression	Cor SEM	Mean Cq	Cq SEM
Aquaporin	WT/ECM	13.6318	3.76891	0.41718	28.15	0.08805
Aquaporin	WT/ECM	16.623	4.05511	0.97802	29.6	0.07738
Aquaporin	WT/ECM	7.16104	2.84017	0.19718	29.36	0.0905
Aquaporin	WT/ECM	7.42164	2.89174	0.06145	27.99	0.00792
Aquaporin	WT/ECM	8.55436	3.09666	0.11771	29.12	0.00876
Aquaporin	MYB115_L5/ECM	16.9804	4.0858	1.53495	30.42	0.17103
Aquaporin	MYB115_L5/ECM	9.92212	3.31065	0.39285	29.7	0.11636
Aquaporin	MYB115_L5/ECM	15.5731	3.96098	0.56126	30.77	0.13756
Aquaporin	MYB115_L5/ECM	7.06049	2.81977	0.89347	33.73	0.51418
Aquaporin	MYB115_L5/ECM	9.21132	3.20341	0.32854	28.69	0.03551
Aquaporin	MYB115_L4/ECM	10.0123	3.3237	0.34232	30.86	0.04216
Aquaporin	MYB115_L4/ECM	5.77289	2.52929	0.32905	33.01	0.07114
Aquaporin	MYB115_L4/ECM	6.76235	2.75752	0.7307	32.25	0.12186
Aquaporin	MYB115_L4/ECM	9.00501	3.17073	0.21075	29.41	0.062
Aquaporin	MYB115_L4/ECM	9.21226	3.20356	1.41723	34.77	0.621
Aquaporin	Free-living mycelia	1.63239	0.706986	0.04268	32.02	0.02338
Aquaporin	Free-living mycelia	4.60516	2.20325	0.14725	31.2	0.11831
Aquaporin	Free-living mycelia	1.12587	0.17104	0.02491	29.32	0.08275
Aquaporin	Free-living mycelia	1.22148	0.28863	0.04078	29.54	0.12848
Aquaporin	Free-living mycelia	1	0	0.04651	30.16	0.18473
PME1	WT/ECM	7.51694	5.18513	2.91015	35.09	0.98789
PME1	WT/ECM	14.8835	1.46966	3.89565	28.38	0.13792
PME1	WT/ECM	12.7603	0.56422	3.67359	28.11	0.00386
PME1	WT/ECM	22.756	1.30376	4.50818	27.05	0.03958
PME1	WT/ECM	10.6343	1.2124	3.41065	30.29	0.15041
PME1	MYB165_B1	16.513	1.32909	4.04553	30.3	0.10244
PME1	MYB165_B1	7.96514	1.47187	2.9937	33.49	0.26127
PME1	MYB165_B1	8.5031	0.45074	3.08799	28.02	0.02738
PME1	MYB165_B1	5.14661	0.84588	2.36362	31.52	0.23504
PME1	MYB165_B1	6.74578	1.17515	2.75399	30.56	0.24935
PME1	MYB165_C2	21.041	2.67536	4.39513	28.97	0.1775
PME1	MYB165_C2	10.4487	0.18718	3.38525	29.74	0.00652
PME1	MYB165_C2	11.7266	0.79913	3.55171	28.77	0.02406
PME1	MYB165_C2	9.97042	1.24957	3.31765	29.58	0.17272
PME1	MYB165_C2	5.93537	0.23955	2.56934	30.13	0.05009
PME1	Free-living mycelia	1	0.02665	0	29.59	0.02315
PME1	Free-living mycelia	0.83632	0.12672	-0.257873	29.89	0.21319
PME1	Free-living mycelia	0.95334	0.06043	-0.0689373	29.9	0.0372
PME1	Free-living mycelia	1.00332	0.04443	0.00478181	29.53	0.02472
PME1	Free-living mycelia	1.10635	0.05275	0.145808	29.42	0.06605
PF6.2	WT/ECM	2.74646	0.43822	1.45757	30.23	0.1964
PF6.2	WT/ECM	3.16013	0.11745	1.65998	24.3	0.04005
PF6.2	WT/ECM	1.72615	0.08539	0.787558	24.68	0.03224
PF6.2	WT/ECM	2.15454	0.10962	1.10738	24.14	0.01106
PF6.2	WT/ECM	1.62151	0.22986	0.697338	26.69	0.19338
PF6.2	MYB165_B1	2.10271	0.18668	1.07225	26.95	0.11583
PF6.2	MYB165_B1	1.62098	0.05957	0.696866	29.47	0.00156
PF6.2	MYB165_B1	1.3696	0.06785	0.453755	24.33	0.00311
PF6.2	MYB165_B1	0.96154	0.03688	-0.0565812	27.62	0.04561
PF6.2	MYB165_B1	1.06163	0.05462	0.086281	26.91	0.06725
PF6.2	MYB165_C2	2.69538	0.12579	1.43049	25.62	0.04888
PF6.2	MYB165_C2	1.85271	0.1142	0.889637	25.92	0.08534
PF6.2	MYB165_C2	1.46692	0.13742	0.55279	25.45	0.0958
PF6.2	MYB165_C2	1.79449	0.2348	0.843574	25.73	0.18104
PF6.2	MYB165_C2	1.68682	0.05161	0.754306	25.63	0.03267
PF6.2	Free-living mycelia	1	0.02663	0	23.28	0.0231
PF6.2	Free-living mycelia	0.95814	0.03313	-0.0616916	23.38	0.01248
PF6.2	Free-living mycelia	1.09855	0.09857	0.135601	23.37	0.09889
PF6.2	Free-living mycelia	0.68979	0.03756	-0.535771	23.76	0.05197
PF6.2	Free-living mycelia	0.86189	0.0593	-0.214424	23.46	0.09739
Aquaporin	WT/ECM	7.44492	1.12522	2.89626	31.79	0.18201
Aquaporin	WT/ECM	5.5698	1.26322	2.47763	26.49	0.32525
Aquaporin	WT/ECM	5.22557	0.33563	2.38559	26.09	0.06732
Aquaporin	WT/ECM	8.94528	0.64904	3.16113	25.09	0.07544
Aquaporin	WT/ECM	14.485	1.13375	3.85648	26.54	0.09122
Aquaporin	MYB165_B1	7.37022	0.77437	2.88171	28.15	0.14138
Aquaporin	MYB165_B1	3.6481	0.52936	1.86715	31.31	0.20253
Aquaporin	MYB165_B1	2.88919	0.24843	1.53067	26.26	0.10144
Aquaporin	MYB165_B1	5.82494	0.19592	2.54224	28.03	0.03705
Aquaporin	MYB165_B1	5.03303	0.11534	2.33143	27.67	0.01029
Aquaporin	MYB165_C2	5.54113	0.89693	2.47018	27.59	0.22889
Aquaporin	MYB165_C2	5.5784	0.22594	2.47985	27.33	0.05281
Aquaporin	MYB165_C2	4.84336	0.34498	2.27601	26.73	0.03837
Aquaporin	MYB165_C2	5.83959	0.38602	2.54587	27.04	0.07896
Aquaporin	MYB165_C2	5.16425	0.54958	2.36856	27.02	0.15063
Aquaporin	Free-living mycelia	1	0.07777	0	26.28	0.10792
Aquaporin	Free-living mycelia	0.78304	0.03041	-0.352842	26.68	0.0284
Aquaporin	Free-living mycelia	0.97846	0.0894	-0.0314152	26.55	0.10196
Aquaporin	Free-living mycelia	0.4501	0.02153	-1.15168	27.38	0.03596
Aquaporin	Free-living mycelia	0.53163	0.05054	-0.911506	27.17	0.13579
