# Supplementary material for: Regulation of pectin remodeling and ectomycorrhiza development by cell wall localized proanthocyanidins in hybrid aspen roots
Source: Research Square preprint supplement (doi:10.21203/rs.3.rs-6966375/v1), 2025-07-04
Supplement: Supplementary file 5 [file 6723710c21af9a87fe823fcd.xlsx]

## Sheet: S4_OPLS-DA
Supplementary Table S4. Results of OPLS-DA (orthogonal projections to latent structures discriminant analysis) of control and ECM root samples. OPLS-DA was performed with Simca®. The analysis included control and ectomycorrhizal (ECM) root samples and 2155 mass features with less than 50% of missing values. Mass features considered to account the most for the separation of control (C) and ECM roo…
Primary ID	Metabolite group	Formula	Mass	RT (min)	Hits	Hits C	Hits ECM	VIP[1+1+0]	VIP cvSE * 2.44693	p	p(corr)		Primary ID	Compound Name	Sample ID	Time (day)	Treatment, C=control, ECM=ectomycorrhiza, F=fungi	Class	t * 1.00179	to * 1.27949
1.77_139.063		C7H9NO2	139.063	1.77	30	15	15	1.53583	0.277031	-0.0353918	-0.960376		1	1	3d_CONT_R1	3	C	1	-20.1109	-6.48573
Prodelphinidin dimer 9	PA	C30H26O13	594.136	2.83	30	15	15	1.48667	0.235782	-0.0343644	-0.932678		2	2	3d_CONT_R2	3	C	1	-21.8101	-37.7297
Prodelphinidin dimer 3	PA	C30H26O13	594.136	1.76	30	15	15	1.47475	0.274231	-0.0340232	-0.923314		3	3	3d_CONT_R3	3	C	1	-20.7227	-25.0535
Prodelphinidin trimer 3	PA	C45H38O20	898.194	2.08	30	15	15	1.45933	0.242344	-0.0336654	-0.913809		4	11	7d_Cont_R1	7	C	1	-30.1085	0.715272
Prodelphinidin trimer 6	PA	C45H38O19	882.199	2.42	30	15	15	1.45844	0.281338	-0.0336482	-0.91315		5	12	7d_Cont_R2	7	C	1	-25.3764	1.07414
2.76_302.095			302.095	2.76	28	15	13	1.51831	0.153058	-0.0344707	-0.909889		6	13	7d_Cont_R3	7	C	1	-27.2207	-24.1332
3.11_296.147		C12H24O8	296.147	3.11	30	15	15	1.47202	0.167014	-0.0334619	-0.908141		7	21	14d_Cont_R1	14	C	1	-38.6525	22.6136
2.6_387.977			387.977	2.6	30	15	15	1.44641	0.245706	-0.0334542	-0.907817		8	22	14d_Cont_R2	14	C	1	-29.1799	15.2458
2.37_282.131		C11H22O8	282.131	2.37	30	15	15	1.46389	0.201128	-0.0332116	-0.901663		9	23	14d_Cont_R3	14	C	1	-29.1752	-9.62594
2.6_358.065			358.065	2.6	30	15	15	1.43647	0.306773	-0.0332259	-0.901509		10	33	21d_Cont_R1	21	C	1	-24.2809	16.8842
2.6_374.037		C28H6O2	374.037	2.6	30	15	15	1.43509	0.301996	-0.0331938	-0.900729		11	34	21d_Cont_R2	21	C	1	-27.2534	25.6249
2.6_420.037			420.037	2.6	30	15	15	1.42553	0.329453	-0.0329766	-0.894739		12	35	21d_Cont_R3	21	C	1	-19.5685	5.40646
2.6_390.002			390.002	2.6	30	15	15	1.42584	0.310894	-0.0329679	-0.894635		13	45	28d_Cont_R1	28	C	1	-27.2983	0.332618
3.1_425.074			425.074	3.1	30	15	15	1.45333	0.1637	-0.0328759	-0.892675		14	46	28d_Cont_R2	28	C	1	-28.1209	1.83511
Epigallocatechin 1	PA	C15H14O7	306.074	2.46	30	15	15	1.42497	0.216914	-0.0328654	-0.892162		15	47	28d_Cont_R3	28	C	1	-25.3439	5.14239
2.6_618.112			618.112	2.6	29	15	14	1.42645	0.317028	-0.0329933	-0.888569		16	5	3d_ECM_R1	3	ECM	2	24.055	-7.45788
Prodelphinidin trimer 5	PA	C45H38O19	882.199	2.24	30	15	15	1.41246	0.441032	-0.032562	-0.883607		17	6	3d_ECM_R2	3	ECM	2	17.2286	-0.432425
2.77_310.127		C12H22O9	310.127	2.77	30	15	15	1.4643	0.116123	-0.0325029	-0.88247		18	7	3d_ECM_R3	3	ECM	2	9.73347	-21.5801
3.3_459.194			459.194	3.3	30	15	15	1.45357	0.108393	-0.032457	-0.88132		19	15	7d_ECM_R1	7	ECM	2	34.0183	41.4158
2.76_300.098			300.098	2.76	30	15	15	1.46245	0.120255	-0.03243	-0.880493		20	16	7d_ECM_R2	7	ECM	2	21.4685	21.1047
2.76_102.068		C5H10O2	102.068	2.76	30	15	15	1.44609	0.141491	-0.0323838	-0.879202		21	17	7d_ECM_R3	7	ECM	2	23.9671	6.14879
3.12_340.129			340.129	3.12	30	15	15	1.43873	0.179503	-0.0323875	-0.879177		22	25	14d_ECM_R1	14	ECM	2	29.9369	-3.97613
3.77_366.189		C16H30O9	366.189	3.77	30	15	15	1.43507	0.229247	-0.0323487	-0.878195		23	26	14d_ECM_R2	14	ECM	2	33.0814	-0.954068
2.8_316.116		C14H20O8	316.116	2.8	30	15	15	1.40771	0.163008	-0.0323112	-0.877065		24	27	14d_ECM_R3	14	ECM	2	22.8759	32.9372
2.47_398.079		C24H14O6	398.079	2.47	30	15	15	1.40681	0.445066	-0.0323015	-0.87649		25	37	21d_ECM_R1	21	ECM	2	39.6106	-0.133786
2.6_435.001			435.001	2.6	30	15	15	1.39596	0.347248	-0.032286	-0.876089		26	38	21d_ECM_R2	21	ECM	2	33.8154	-3.98366
4.16_901.371			901.371	4.16	29	14	15	1.40631	0.235722	-0.0314504	-0.873309		27	39	21d_ECM_R3	21	ECM	2	19.9573	-5.47801
Prodelphinidin dimer 1	PA	C30H26O14	610.131	1.5	30	15	15	1.39203	0.28791	-0.03214	-0.872503		28	49	28d_ECM_R1	28	ECM	2	31.6677	-21.5422
4.96_512.282			512.282	4.96	30	15	15	1.4399	0.18655	-0.0320433	-0.870105		29	50	28d_ECM_R1	28	ECM	2	22.4531	-22.5158
Prodelphinidin dimer 4	PA	C30H26O13	594.137	1.92	30	15	15	1.38728	0.211585	-0.0320475	-0.869827		30	51	28d_ECM_R1	28	ECM	2	20.0325	-23.3603
2.76_208.057			208.057	2.76	29	15	14	1.47007	0.170822	-0.0326729	-0.869101
2.6_502.036			502.036	2.6	30	15	15	1.38453	0.308223	-0.0320252	-0.869031
2.6_452.053		C26H12O8	452.053	2.6	30	15	15	1.38362	0.32442	-0.0320062	-0.86851
Prodelphinidin dimer 7	PA	C30H26O14	610.131	2.33	30	15	15	1.38184	0.334892	-0.0319617	-0.867589
1.29_280.116		C11H20O8	280.116	1.29	30	15	15	1.43139	0.239483	-0.0318923	-0.865947
3.31_510.191			510.191	3.31	30	15	15	1.42609	0.153388	-0.0318294	-0.864335
Homogentisic acid/Hydroxymethoxybenzoic acid glucoside 3	Phenolic glycoside	C14H18O9	330.094	2.86	30	15	15	1.42238	0.282205	-0.0317854	-0.863274
Catechin(-)	PA	C15H14O6	290.079	2.99	30	15	15	1.37347	0.321675	-0.0317613	-0.861781
4.6_508.251			508.251	4.6	30	15	15	1.40625	0.354962	-0.0317388	-0.861708
2.61_288.064			288.064	2.61	30	15	15	1.37263	0.355579	-0.0317525	-0.861531
Prodelphinidin trimer 2	PA	C45H38O20	898.193	1.89	29	15	14	1.37699	0.335206	-0.0318397	-0.860173
Prodelphinidin trimer 4	PA	C45H38O21	914.189	1.81	29	15	14	1.38407	0.365122	-0.0320164	-0.859474
3.7_410.215		C18H34O10	410.215	3.7	30	15	15	1.43796	0.107794	-0.0316321	-0.859006
3.31_508.103			508.103	3.31	30	15	15	1.43007	0.157684	-0.0316307	-0.858926
4.37_484.252		C21H40O12	484.252	4.37	30	15	15	1.41426	0.222241	-0.0316348	-0.858783
1.29_326.121		C12H22O10	326.121	1.29	30	15	15	1.42953	0.207078	-0.0315915	-0.857792
2.37_352.095		C20H16O6	352.095	2.37	26	15	11	1.46127	0.182578	-0.0328965	-0.857329
3.25_330.131		C15H22O8	330.131	3.25	30	15	15	1.3693	0.301573	-0.0315844	-0.856935
Prodelphinidin trimer 1	PA	C45H38O19	882.199	1.52	30	15	15	1.37873	0.435254	-0.0315879	-0.856858
3.11_358.131			358.131	3.11	29	14	15	1.40348	0.258853	-0.0315818	-0.856115
Benzyl-HCH fr	Phenolic	C14H14O4	246.089	2.6	30	15	15	1.36298	0.338157	-0.0315292	-0.85556
3.55_334.198			334.198	3.55	30	15	15	1.41187	0.271124	-0.031507	-0.855545
3.3_432.188			432.188	3.3	30	15	15	1.42294	0.164653	-0.0314938	-0.855238
2.6_481.007			481.007	2.6	30	15	15	1.36219	0.442736	-0.0315111	-0.855015
2.74_196.073			196.073	2.74	30	15	15	1.38533	0.298505	-0.0314922	-0.854603
2.6_222.089		C12H14O4	222.089	2.6	30	15	15	1.36109	0.373504	-0.0314845	-0.854342
2.85_438.173			438.173	2.85	30	15	15	1.41296	0.110489	-0.0314704	-0.854321
3.3_434.173		C26H26O6	434.173	3.3	30	15	15	1.42881	0.11023	-0.0314505	-0.854004
Tremuloidin 1	Salicinoid	C20H22O8	390.132	3.38	30	15	15	1.36332	0.397404	-0.0314604	-0.85372
2.76_409.043			409.043	2.76	30	15	15	1.42461	0.137584	-0.0314389	-0.853606
4.78_512.282			512.282	4.78	30	15	15	1.40158	0.336383	-0.0314298	-0.853344
2.77_352.094		C20H16O6	352.094	2.77	27	15	12	1.48505	0.233854	-0.0330006	-0.853243
3.7_456.221			456.221	3.7	30	15	15	1.4301	0.112898	-0.031365	-0.851789
3.7_576.166			576.166	3.7	30	15	15	1.42153	0.221838	-0.0313646	-0.851701
Catechin(+)	PA	C15H14O6	290.079	2.6	30	15	15	1.35698	0.359685	-0.0313858	-0.851638
3.91_392.204			392.204	3.91	30	15	15	1.39427	0.217899	-0.031349	-0.850774
Benzyl salicylate 2	SA derivative	C14H12O3	228.079	3.72	29	15	14	1.35462	0.289943	-0.0312408	-0.849348
3.28_480.09			480.09	3.28	30	15	15	1.36914	0.341543	-0.0312908	-0.849129
2.77_380.089		C21H16O7	380.089	2.77	30	15	15	1.4215	0.147154	-0.0312586	-0.848774
4.26_583.168			583.168	4.26	30	15	15	1.39247	0.288179	-0.0312579	-0.848553
2.37_381.048			381.048	2.37	27	15	12	1.4701	0.17292	-0.0330983	-0.846109
1.73_459.003			459.003	1.73	28	14	14	1.36208	0.183636	-0.0304675	-0.8457
0.88_331.054			331.054	0.88	30	15	15	1.35114	0.324479	-0.0311602	-0.84555
3.35_308.146			308.146	3.35	30	15	15	1.38831	0.273952	-0.0311187	-0.844532
2.6_204.079		C12H12O3	204.079	2.6	30	15	15	1.34548	0.332672	-0.0311232	-0.84448
2.6_378.053			378.053	2.6	30	15	15	1.3452	0.307669	-0.0311129	-0.844235
1.89_398.082			398.082	1.89	30	15	15	1.37292	0.245822	-0.0310926	-0.843914
Salicylic acid fr 5	SA derivative	C7H6O3	138.032	2.6	30	15	15	1.34427	0.367776	-0.0310937	-0.843814
Homogentisic acid/Hydroxymethoxybenzoic acid glucoside 2 (FA)	Phenolic glycoside	C15H20O11	376.099	1.89	30	15	15	1.364	0.343695	-0.0310524	-0.8429
2.6_406.048		C25H10O6	406.048	2.6	30	15	15	1.34373	0.331853	-0.03106	-0.84285
2.6_633.068			633.068	2.6	30	15	15	1.34493	0.376286	-0.0310587	-0.842802
2.77_430.073			430.073	2.77	30	15	15	1.41961	0.104564	-0.0309896	-0.841464
Benzyl salicylate 1	SA derivative	C14H12O3	228.079	3.38	30	15	15	1.34167	0.328954	-0.031007	-0.841141
3.22_162.089		C7H14O4	162.089	3.22	30	15	15	1.40741	0.134069	-0.0309827	-0.841103
Homogentisic acid/Hydroxymethoxybenzoic acid fr 2	Phenolic	C8H8O4	168.042	1.89	30	15	15	1.36169	0.383862	-0.0309674	-0.840641
1.6_280.116		C11H20O8	280.116	1.6	30	15	15	1.40366	0.133938	-0.030938	-0.840064
3.7_524.208			524.208	3.7	30	15	15	1.41602	0.135854	-0.0309304	-0.839941
4.08_418.219			418.219	4.08	28	15	13	1.41968	0.188681	-0.0319446	-0.838553
1.65_288.085			288.085	1.65	30	15	15	1.38905	0.286224	-0.030867	-0.837997
4.74_524.246			524.246	4.74	30	15	15	1.40536	0.131083	-0.0308379	-0.837377
3.25_432.176			432.176	3.25	28	14	14	1.36086	0.182921	-0.030393	-0.837018
1.92_346.125			346.125	1.92	30	15	15	1.38314	0.190452	-0.0308307	-0.836861
2.61_404.072			404.072	2.61	30	15	15	1.33111	0.382777	-0.0307905	-0.835599
1.84_374.061			374.061	1.84	30	15	15	1.32986	0.410228	-0.0307575	-0.835184
Dehydroquercetin 3	Flavonoid	C15H12O7	304.06	1.85	30	15	15	1.32991	0.392588	-0.0307593	-0.835147
4.67_498.267			498.267	4.67	30	15	15	1.40454	0.130889	-0.0307305	-0.834627
3.7_473.209			473.209	3.7	30	15	15	1.41299	0.115425	-0.0307265	-0.834436
2.28_372.105			372.105	2.28	28	14	14	1.34584	0.274413	-0.0309537	-0.833595
Homogentisic acid/Hydroxymethoxybenzoic acid glucoside 2	Phenolic glycoside	C14H18O9	330.095	1.89	30	15	15	1.35461	0.327544	-0.0307001	-0.83338
3.6_320.22			320.22	3.6	25	15	10	1.42272	0.143406	-0.031857	-0.833082
3.95_456.22			456.22	3.95	30	15	15	1.3969	0.29422	-0.0306393	-0.832035
4.26_508.211			508.211	4.26	30	15	15	1.38266	0.210694	-0.0306246	-0.831556
4.59_566.254			566.254	4.59	30	15	15	1.39871	0.105163	-0.0306099	-0.83148
3.85_368.204			368.204	3.85	30	15	15	1.41502	0.231628	-0.0305799	-0.830331
1.68_410.051			410.051	1.68	30	15	15	1.39604	0.175542	-0.030577	-0.830306
4.13_494.236			494.236	4.13	30	15	15	1.3759	0.320656	-0.0305592	-0.829825
3.19_296.147			296.147	3.19	29	15	14	1.40978	0.277883	-0.0314202	-0.829673
3.31_512.168			512.168	3.31	30	15	15	1.38617	0.173048	-0.0305301	-0.829114
2.58_402.115			402.115	2.58	30	15	15	1.33275	0.287261	-0.0305637	-0.829066
1.84_436.031			436.031	1.84	30	15	15	1.32163	0.434947	-0.0305126	-0.828276
4.22_584.335			584.335	4.22	29	15	14	1.40369	0.180034	-0.0313319	-0.82773
Tremuloidin 2	Salicinoid	C20H22O8	390.131	3.72	30	15	15	1.31957	0.345554	-0.0305085	-0.827631
Prodelphinidin trimer 7	PA	C45H38O19	882.199	2.71	30	15	15	1.31838	0.260147	-0.0304796	-0.827126
3.48_585.205			585.205	3.48	30	15	15	1.35597	0.28897	-0.0304708	-0.827014
3.7_446.191			446.191	3.7	30	15	15	1.40705	0.116117	-0.0304403	-0.826766
2.8_415.033			415.033	2.8	27	15	12	1.36073	0.164477	-0.0313259	-0.826242
3.7_498.189			498.189	3.7	30	15	15	1.38688	0.182424	-0.0303833	-0.825085
1.53_348.106			348.106	1.53	30	15	15	1.38343	0.126581	-0.0303797	-0.824898
4.26_476.22			476.22	4.26	30	15	15	1.3929	0.153462	-0.0303773	-0.824822
3.7_555.138			555.138	3.7	30	15	15	1.3965	0.202183	-0.0303711	-0.824643
4.25_438.246			438.246	4.25	30	15	15	1.38646	0.196254	-0.0303687	-0.824595
4.08_464.225			464.225	4.08	30	15	15	1.36471	0.144695	-0.0303002	-0.822523
4.26_604.197			604.197	4.26	30	15	15	1.34092	0.282579	-0.0302842	-0.822468
3.74_552.27			552.27	3.74	30	15	15	1.39564	0.12263	-0.0302735	-0.822207
2.89_426.063			426.063	2.89	30	15	15	1.34083	0.287282	-0.0302815	-0.8222
2.82_474.085			474.085	2.82	30	15	15	1.33529	0.287821	-0.0302983	-0.822161
1.72_408.076			408.076	1.72	30	15	15	1.34252	0.361934	-0.0302788	-0.822146
3.32_702.218			702.218	3.32	30	15	15	1.352	0.349411	-0.0302806	-0.821965
Salicyl-HCH (Acylsaligenin)	Salicinoid	C14H14O5	262.084	1.84	30	15	15	1.30952	0.417683	-0.0302734	-0.821937
Caffeoylshikimate	Phenolic	C16H16O8	336.085	3.12	30	15	15	1.30919	0.49567	-0.0302849	-0.821761
1.94_478.116			478.116	1.94	30	15	15	1.33088	0.36492	-0.0302734	-0.821556
3.64_546.27			546.27	3.64	30	15	15	1.39204	0.101292	-0.0302429	-0.821502
3.07_568.142			568.142	3.07	30	15	15	1.33907	0.376248	-0.0302512	-0.821483
1.65_334.09			334.09	1.65	30	15	15	1.37252	0.284676	-0.0302354	-0.820881
3.7_526.185			526.185	3.7	26	15	11	1.4425	0.0976288	-0.0317068	-0.820116
4.09_468.22			468.22	4.09	30	15	15	1.37377	0.340185	-0.0301988	-0.819825
Salicylic acid fr 2	SA derivative	C7H6O3	138.032	1.84	29	14	15	1.29398	0.377635	-0.0299332	-0.819536
1.3_298.124			298.124	1.3	30	15	15	1.39373	0.116544	-0.0301316	-0.818475
3.12_538.203			538.203	3.12	30	15	15	1.37104	0.255118	-0.0301442	-0.818215
4.09_470.236			470.236	4.09	30	15	15	1.37779	0.262453	-0.0301377	-0.818141
Salirepin 2	Phenolic glycoside	C13H18O8	302.1	2.32	30	15	15	1.36188	0.265822	-0.0301377	-0.818113
4.59_452.261			452.261	4.59	30	15	15	1.35451	0.216444	-0.0300883	-0.817218
0.73_327.948			327.948	0.73	30	15	15	1.30203	0.249344	-0.030112	-0.817066
3.99_348.178			348.178	3.99	29	15	14	1.40699	0.144958	-0.0304139	-0.816933
1.92_482.106			482.106	1.92	29	15	14	1.37091	0.261462	-0.0308412	-0.816838
3.05_479.164			479.164	3.05	30	15	15	1.37166	0.115562	-0.0300753	-0.816661
Catechin glucoside	PA	C21H24O11	452.133	2.3	30	15	15	1.3213	0.313436	-0.0300576	-0.816307
3.21_522.205			522.205	3.21	30	15	15	1.32487	0.159168	-0.0300585	-0.815863
1.19_326.121			326.121	1.19	30	15	15	1.37048	0.22868	-0.0300278	-0.815416
Catechol/Hydroquinone 1	Phenolic	C6H6O2	110.037	1.86	30	15	15	1.30688	0.285292	-0.030014	-0.81516
6.3_562.335			562.335	6.3	30	15	15	1.35554	0.433589	-0.0299752	-0.813963
4.26_578.257			578.257	4.26	30	15	15	1.33685	0.239286	-0.0299793	-0.81384
1.65_236.035			236.035	1.65	30	15	15	1.34996	0.21978	-0.0299303	-0.812912
Hydroxycinnamic acid/Coniferoyl aldehyde 1	Coniferyl alcohol derivative	C10H10O3	178.063	2.7	30	15	15	1.32004	0.206229	-0.0299371	-0.812567
Pinobanksin/Naringenin	Flavonoid	C15H12O5	272.068	3.62	30	15	15	1.31528	0.411252	-0.0299302	-0.812557
3.49_1056.383			1056.38	3.49	30	15	15	1.35093	0.223656	-0.0299326	-0.812513
Acetyl-salicin 2 {2’ or 6’} (FA)	Salicinoid	C16H22O10	374.121	2	30	15	15	1.35785	0.122377	-0.029896	-0.81189
3.26_378.188			378.188	3.26	30	15	15	1.38494	0.152509	-0.0298719	-0.811381
2.81_482.105			482.105	2.81	30	15	15	1.29951	0.368267	-0.0298845	-0.810717
OH-Tremuloidin-like 1 (FA)	Salicinoid	C21H24O11	452.132	2.02	28	13	15	1.31006	0.349	-0.0296835	-0.810621
1.83_426.04			426.04	1.83	30	15	15	1.33932	0.230245	-0.0298586	-0.810529
2.81_388.136			388.136	2.81	30	15	15	1.30332	0.20478	-0.0298575	-0.810465
3.48_558.186			558.186	3.48	30	15	15	1.34789	0.326967	-0.0298391	-0.810073
1.85_420.125			420.125	1.85	30	15	15	1.35875	0.320248	-0.0297962	-0.809308
1.89_542.051			542.051	1.89	30	15	15	1.31098	0.418169	-0.0297614	-0.807845
Homogentisic acid/Hydroxymethoxybenzoic acid glucoside 4	Phenolic glycoside	C14H18O9	330.095	3.09	30	15	15	1.3032	0.495435	-0.029755	-0.807718
4.25_554.214			554.214	4.25	30	15	15	1.33586	0.370884	-0.0297506	-0.807495
2.9_438.129			438.129	2.9	30	15	15	1.37756	0.0776098	-0.029727	-0.807346
3.48_1097.33			1097.33	3.48	30	15	15	1.34162	0.280173	-0.0297183	-0.806896
3.31_396.199			396.199	3.31	30	15	15	1.3597	0.213118	-0.0297064	-0.806821
2.9_448.157			448.157	2.9	30	15	15	1.38773	0.158069	-0.0296989	-0.806587
3.2_452.187			452.187	3.2	30	15	15	1.37183	0.162053	-0.0296854	-0.806254
3.57_442.205			442.205	3.57	30	15	15	1.36546	0.35324	-0.0296825	-0.806116
2.86_664.256			664.256	2.86	28	15	13	1.38748	0.215924	-0.0308787	-0.80578
3.48_564.181			564.181	3.48	30	15	15	1.33831	0.345662	-0.0296842	-0.80563
3.2_173.105			173.105	3.2	30	15	15	1.28793	0.384594	-0.0296693	-0.8053
Prodelphinidin dimer 6	PA	C30H26O13	594.136	2.04	30	15	15	1.28566	0.273598	-0.0296645	-0.80502
0.73_311.977			311.977	0.73	30	15	15	1.28135	0.443242	-0.0296407	-0.804481
Caffeoyl glucose 3	Phenolic glycoside	C15H18O9	342.095	2.94	30	15	15	1.30914	0.419029	-0.0296239	-0.804019
3.48_1082.38			1082.38	3.48	30	15	15	1.32705	0.219539	-0.0296114	-0.803991
2.47_606.124			606.124	2.47	30	15	15	1.34812	0.118665	-0.0296113	-0.803832
3.25_370.184			370.184	3.25	30	15	15	1.37031	0.271255	-0.0295916	-0.80348
3.88_436.23			436.23	3.88	30	15	15	1.32431	0.239238	-0.0295779	-0.803059
3.09_326.156			326.156	3.09	30	15	15	1.35583	0.171653	-0.0295612	-0.802875
4.26_474.223			474.223	4.26	30	15	15	1.3638	0.189607	-0.0295553	-0.802454
4.16_462.205			462.205	4.16	30	15	15	1.36428	0.343803	-0.0295602	-0.80244
2.49_318.144			318.144	2.49	30	15	15	1.33155	0.38283	-0.0295346	-0.802026
4.26_568.213			568.213	4.26	30	15	15	1.35035	0.198672	-0.0295293	-0.801896
4.59_488.238			488.238	4.59	30	15	15	1.35971	0.123676	-0.0294945	-0.801243
2.9_402.152			402.152	2.9	30	15	15	1.37571	0.127267	-0.0294834	-0.800746
3.22_568.215			568.215	3.22	30	15	15	1.28411	0.214278	-0.0295096	-0.800679
2.24_234.11			234.11	2.24	30	15	15	1.35373	0.167848	-0.0294748	-0.800593
1.29_266.1			266.1	1.29	30	15	15	1.31699	0.219784	-0.0294986	-0.800497
3.7_510.139			510.139	3.7	30	15	15	1.33686	0.383022	-0.0294763	-0.800491
4.43_496.25			496.25	4.43	30	15	15	1.34477	0.232252	-0.0294781	-0.800478
3.53_368.204			368.204	3.53	30	15	15	1.36128	0.219213	-0.029441	-0.799745
5.4_944.287			944.287	5.4	30	15	15	1.31472	0.273604	-0.0294618	-0.799574
1.89_475.017			475.017	1.89	30	15	15	1.30455	0.331259	-0.0294571	-0.799462
3.05_452.144			452.144	3.05	30	15	15	1.37683	0.0867027	-0.0293959	-0.798463
4.04_374.194			374.194	4.04	30	15	15	1.29713	0.215414	-0.0294097	-0.79802
1.58_307.128			307.128	1.58	30	15	15	1.37014	0.195832	-0.0293877	-0.797987
3.12_520.19			520.19	3.12	30	15	15	1.3011	0.401799	-0.0293867	-0.797818
5_646.204			646.204	5	30	15	15	1.3248	0.379246	-0.0293853	-0.797691
3.68_502.204			502.204	3.68	25	12	13	1.2047	0.385695	-0.0276914	-0.797535
3.48_522.21			522.21	3.48	30	15	15	1.3319	0.288454	-0.0293663	-0.797321
2.51_388.136			388.136	2.51	30	15	15	1.33079	0.213247	-0.0293557	-0.796962
Salirepin 1 (FA)	Phenolic glycoside	C14H20O10	348.106	1.57	30	15	15	1.34747	0.215542	-0.0293414	-0.796711
4.11_274.214			274.214	4.11	25	15	10	1.43661	0.179689	-0.032058	-0.796212
2.34_322.126			322.126	2.34	30	15	15	1.32821	0.366988	-0.0292965	-0.795825
3.48_568.215			568.215	3.48	30	15	15	1.33021	0.285575	-0.029279	-0.794937
4.26_501.241			501.241	4.26	30	15	15	1.35028	0.236146	-0.0292719	-0.794682
4.59_498.268			498.268	4.59	30	15	15	1.35266	0.152019	-0.0292562	-0.794616
1.89_446.064			446.064	1.89	30	15	15	1.29113	0.420447	-0.0292594	-0.794241
3.05_462.174			462.174	3.05	30	15	15	1.36835	0.13483	-0.0292313	-0.794024
1.83_296.066			296.066	1.83	30	15	15	1.33007	0.172838	-0.0292299	-0.793519
3.24_392.115			392.115	3.24	29	15	14	1.31023	0.415138	-0.0298283	-0.793274
3.64_354.188			354.188	3.64	26	15	11	1.39544	0.255178	-0.0310577	-0.792926
4.11_482.269			482.269	4.11	29	15	14	1.28683	0.428368	-0.0293291	-0.792682
4.17_420.198			420.198	4.17	30	15	15	1.28534	0.15657	-0.0292032	-0.792423
3.88_470.235			470.235	3.88	30	15	15	1.3376	0.192192	-0.0291538	-0.791783
3.32_493.179			493.179	3.32	30	15	15	1.35014	0.143967	-0.0291466	-0.791609
3.14_612.132			612.132	3.14	30	15	15	1.30896	0.262837	-0.0291544	-0.791432
3.51_488.188			488.188	3.51	30	15	15	1.31378	0.376106	-0.0291244	-0.790662
1.97_316.115		C14H20O8	316.115	1.97	30	15	15	1.31485	0.166386	-0.0291108	-0.790404
3.48_1090.422			1090.42	3.48	30	15	15	1.30899	0.290984	-0.0290514	-0.788792
3.5_534.173			534.173	3.5	30	15	15	1.29108	0.367097	-0.0290636	-0.788643
Procyanidin pentamer 2	PA	C75H62O30	1442.33	2.77	30	15	15	1.26789	0.536718	-0.0290369	-0.788044
3.48_600.212			600.212	3.48	30	15	15	1.31331	0.303683	-0.0290074	-0.787472
3.31_442.205			442.205	3.31	30	15	15	1.34414	0.104815	-0.0289859	-0.787422
3.52_486.232			486.232	3.52	30	15	15	1.37306	0.119251	-0.0289481	-0.786261
3.05_584.209			584.209	3.05	30	15	15	1.29106	0.273369	-0.0289729	-0.78608
3.53_340.172			340.172	3.53	30	15	15	1.29518	0.42006	-0.0289493	-0.78606
2.73_562.144			562.144	2.73	30	15	15	1.25765	0.427786	-0.0289593	-0.785636
3.69_480.175			480.175	3.69	30	15	15	1.304	0.371954	-0.0289414	-0.785557
3.05_416.168			416.168	3.05	30	15	15	1.35821	0.150801	-0.0289107	-0.785362
2.61_308.089			308.089	2.61	30	15	15	1.25088	0.435525	-0.0289361	-0.785179
3.45_684.261			684.261	3.45	30	15	15	1.30062	0.448747	-0.02893	-0.785155
3.73_166.063			166.063	3.73	30	15	15	1.34238	0.192775	-0.0289144	-0.785144
3.61_410.066			410.066	3.61	30	15	15	1.30195	0.305466	-0.0289028	-0.78422
2.4_606.124			606.124	2.4	30	15	15	1.32879	0.153123	-0.0288721	-0.783757
3.48_342.144			342.144	3.48	30	15	15	1.3154	0.305915	-0.0288588	-0.783482
3.34_370.184			370.184	3.34	30	15	15	1.35152	0.145595	-0.0288217	-0.782892
2.87_482.106			482.106	2.87	30	15	15	1.31579	0.202624	-0.0288219	-0.78272
4.59_568.227			568.227	4.59	27	13	14	1.29374	0.417439	-0.0288999	-0.782604
4.22_436.265			436.265	4.22	29	15	14	1.34332	0.246124	-0.0296893	-0.782255
3.48_560.184			560.184	3.48	30	15	15	1.30805	0.311362	-0.0288147	-0.782141
3.48_612.236			612.236	3.48	30	15	15	1.29589	0.354192	-0.0288093	-0.782121
2_534.065			534.065	2	30	15	15	1.35509	0.210973	-0.0287928	-0.782063
4.25_523.26			523.26	4.25	30	15	15	1.33211	0.238407	-0.0288014	-0.782018
3.09_290.173			290.173	3.09	30	15	15	1.27853	0.309753	-0.0287866	-0.781542
2.17_252.12			252.12	2.17	29	15	14	1.37694	0.243797	-0.0298041	-0.781315
3.29_652.17			652.17	3.29	30	15	15	1.24926	0.193181	-0.0287917	-0.781112
3.48_630.134			630.134	3.48	30	15	15	1.28976	0.275932	-0.0287529	-0.780508
3.63_434.214			434.214	3.63	30	15	15	1.2837	0.343828	-0.0287308	-0.780155
3.86_468.22			468.22	3.86	30	15	15	1.32423	0.274305	-0.028723	-0.78001
5.85_594.28			594.28	5.85	30	15	15	1.31396	0.248638	-0.0287257	-0.779865
4.26_526.22			526.22	4.26	30	15	15	1.31868	0.252606	-0.0287092	-0.779419
2.91_356.111			356.111	2.91	30	15	15	1.25287	0.432417	-0.0287256	-0.77919
1.82_348.064			348.064	1.82	30	15	15	1.30397	0.222592	-0.0286901	-0.778752
Dehydroquercetin 1	Flavonoid	C15H12O7	304.058	2.61	30	15	15	1.24073	0.425397	-0.0286945	-0.778604
2.85_450.209			450.209	2.85	30	15	15	1.28392	0.257782	-0.0286568	-0.777959
4.21_374.266			374.266	4.21	28	15	13	1.35364	0.416096	-0.0299162	-0.777946
2.28_606.124			606.124	2.28	30	15	15	1.30244	0.244053	-0.0286618	-0.77792
3.09_444.087			444.087	3.09	30	15	15	1.24829	0.601601	-0.0286563	-0.77787
3.48_610.175			610.175	3.48	30	15	15	1.29243	0.389702	-0.0286402	-0.77754
3.43_415.975			415.975	3.43	30	15	15	1.26034	0.490042	-0.0286349	-0.777302
Procyanidin dimer 4	PA	C30H26O12	578.142	3.1	30	15	15	1.24647	0.4967	-0.0286567	-0.777245
4.09_512.244			512.244	4.09	26	15	11	1.26622	0.209569	-0.0283028	-0.776983
2.9_422.178			422.178	2.9	30	15	15	1.29771	0.276581	-0.0286147	-0.776965
3.48_590.195			590.195	3.48	30	15	15	1.28642	0.29804	-0.0285957	-0.776227
3.14_428.191			428.191	3.14	30	15	15	1.32956	0.369769	-0.0285742	-0.77616
3.31_541.122			541.122	3.31	30	15	15	1.31069	0.185443	-0.0285667	-0.775924
1.84_306.081			306.081	1.84	30	15	15	1.23528	0.462115	-0.0285661	-0.775593
Prodelphinidin dimer 1 (A-type)	PA	C30H24O13	592.12	2.36	29	15	14	1.25984	0.45998	-0.0291078	-0.775503
2.72_444.073			444.073	2.72	30	15	15	1.27416	0.480324	-0.0285479	-0.774682
5.74_722.371			722.371	5.74	30	15	15	1.29278	0.313551	-0.028484	-0.773398
4.22_710.398			710.398	4.22	30	15	15	1.30585	0.258979	-0.0284595	-0.772869
2.02_356.113			356.113	2.02	30	15	15	1.2894	0.193874	-0.0284467	-0.772865
2_480.148			480.148	2	30	15	15	1.35813	0.192166	-0.028443	-0.772737
5.08_466.276			466.276	5.08	22	15	7	1.32226	0.260193	-0.0301683	-0.772422
Aconitate 2 (cis or trans)	Primary	C6H6O6	174.017	0.73	30	15	15	1.23443	0.280645	-0.0284732	-0.772373
2.54_426.173			426.173	2.54	30	15	15	1.33118	0.130698	-0.0284215	-0.772202
4.53_566.254			566.254	4.53	30	15	15	1.29379	0.354188	-0.0284212	-0.771927
1.82_573.089			573.089	1.82	29	15	14	1.29908	0.297039	-0.0287567	-0.77192
1.82_405.011			405.011	1.82	30	15	15	1.29583	0.246734	-0.0284391	-0.771894
1.82_376.059			376.059	1.82	30	15	15	1.29235	0.271275	-0.0284388	-0.771861
Acetyl-salicin {2’ or 6’}	Salicinoid	C15H20O8	328.116	2.47	30	15	15	1.23199	0.536607	-0.0284373	-0.771638
3.48_652.167			652.167	3.48	30	15	15	1.2808	0.325626	-0.0284234	-0.771601
3.47_368.203			368.203	3.47	30	15	15	1.30906	0.282326	-0.0284095	-0.771416
2.78_466.112			466.112	2.78	30	15	15	1.23144	0.40655	-0.0284225	-0.771022
3.82_746.276			746.276	3.82	30	15	15	1.2967	0.254105	-0.0283985	-0.770902
Cinnamic acid 2	Phenolic	C9H8O2	148.052	2.47	30	15	15	1.25362	0.597639	-0.0283766	-0.770567
1.08_284.111			284.111	1.08	30	15	15	1.27378	0.353904	-0.0283717	-0.770552
2_434.142			434.142	2	30	15	15	1.35604	0.197119	-0.0283577	-0.77043
0.73_406.035			406.035	0.73	30	15	15	1.23265	0.295132	-0.028384	-0.770132
3.27_516.242			516.242	3.27	30	15	15	1.35475	0.30043	-0.0283244	-0.769441
3.31_596.136			596.136	3.31	30	15	15	1.32188	0.176745	-0.0283029	-0.768699
3.05_582.119			582.119	3.05	30	15	15	1.32649	0.140033	-0.0282757	-0.767903
5.08_524.282			524.282	5.08	28	15	13	1.37014	0.222899	-0.0299205	-0.767205
3.29_500.188			500.188	3.29	30	15	15	1.24969	0.381924	-0.028254	-0.767084
2.78_432.127			432.127	2.78	30	15	15	1.35557	0.193468	-0.0282398	-0.767066
3.12_574.178			574.178	3.12	30	15	15	1.27176	0.288801	-0.0282478	-0.767
1.55_310.126			310.126	1.55	30	15	15	1.33396	0.209317	-0.0282352	-0.766984
6.03_560.319			560.319	6.03	30	15	15	1.24458	0.417009	-0.0282462	-0.766979
3.64_482.089			482.089	3.64	30	15	15	1.29417	0.138472	-0.0282594	-0.766929
1.22_282.095			282.095	1.22	30	15	15	1.23923	0.280561	-0.0282499	-0.766604
2_921.194			921.194	2	30	15	15	1.33758	0.231739	-0.0282051	-0.766273
3.82_700.272			700.272	3.82	30	15	15	1.28895	0.356061	-0.0282295	-0.766252
1.61_445.008			445.008	1.61	30	15	15	1.22077	0.408094	-0.0282369	-0.766005
1.94_381.163			381.163	1.94	30	15	15	1.25602	0.305123	-0.0282089	-0.765864
3.07_730.264			730.264	3.07	30	15	15	1.2725	0.295014	-0.0281943	-0.76584
1.82_544.136			544.136	1.82	29	15	14	1.29841	0.199603	-0.028562	-0.765803
Procyanidin dimer 1 (A-type)	PA	C30H24O12	576.125	2.35	30	15	15	1.22171	0.433602	-0.0282266	-0.765704
3.48_466.204			466.204	3.48	30	15	15	1.28454	0.170512	-0.0281811	-0.765684
2.9_488.207			488.207	2.9	27	14	13	1.26883	0.299122	-0.0280425	-0.765636
3.57_396.198			396.198	3.57	30	15	15	1.30344	0.334989	-0.0281963	-0.765595
3.22_338.156			338.156	3.22	30	15	15	1.22639	0.309652	-0.0282024	-0.765557
Phenylalanine fr 1		C9H11NO2	165.079	2.99	30	15	15	1.26157	0.495089	-0.0281694	-0.764983
2.87_817.277			817.277	2.87	28	14	14	1.32371	0.138668	-0.0282923	-0.764528
0.73_194.032			194.032	0.73	30	15	15	1.21965	0.28113	-0.0281789	-0.7645
Tremuloidin 1 (FA)	Salicinoid	C21H24O10	436.135	3.38	29	15	14	1.25721	0.431097	-0.0284287	-0.764492
3.17_760.277			760.277	3.17	30	15	15	1.28312	0.236249	-0.0281338	-0.763987
3.41_472.213			472.213	3.41	29	15	14	1.30076	0.200467	-0.0272976	-0.763707
1.42_305.112			305.112	1.42	30	15	15	1.27046	0.453618	-0.0281202	-0.763687
2.61_456.03			456.03	2.61	30	15	15	1.2169	0.356734	-0.0281362	-0.763525
1.31_206.079			206.079	1.31	30	15	15	1.27749	0.345587	-0.0280929	-0.76332
3.13_382.183			382.183	3.13	30	15	15	1.29439	0.501264	-0.0280921	-0.762946
3.13_730.267			730.267	3.13	30	15	15	1.26007	0.390741	-0.0280721	-0.762564
3.29_568.215			568.215	3.29	30	15	15	1.21961	0.232641	-0.0280971	-0.762254
2.44_414.173			414.173	2.44	30	15	15	1.32469	0.109045	-0.0280466	-0.762046
5.24_526.296			526.296	5.24	30	15	15	1.24452	0.290654	-0.0280372	-0.761539
2.85_258.11			258.11	2.85	30	15	15	1.2919	0.27357	-0.028041	-0.761202
4.46_592.306			592.306	4.46	24	15	9	1.39687	0.188559	-0.0309244	-0.760316
Salicyl aldehyde/Benzoic acid 1	Salicinoid	C7H6O2	122.036	1.93	30	15	15	1.32461	0.21267	-0.0279812	-0.76027
Isopropylmalate-like 1		C7H12O5	176.068	1.75	30	15	15	1.3032	0.291748	-0.0279878	-0.759904
2.6_577.133			577.133	2.6	30	15	15	1.22348	0.558217	-0.0280105	-0.75978
3.48_638.183			638.183	3.48	30	15	15	1.25941	0.360176	-0.0279821	-0.759625
1.89_230.025			230.025	1.89	30	15	15	1.25059	0.520075	-0.0279682	-0.75951
3.52_408.199			408.199	3.52	30	15	15	1.25584	0.337942	-0.027979	-0.759281
3.84_480.22			480.22	3.84	30	15	15	1.27952	0.258571	-0.0279421	-0.759091
3.6_456.219			456.219	3.6	30	15	15	1.27208	0.353603	-0.027936	-0.758833
3.41_434.121			434.121	3.41	30	15	15	1.23285	0.244959	-0.0279487	-0.758401
2.76_324.142			324.142	2.76	30	15	15	1.32649	0.141759	-0.0279166	-0.758332
0.73_112.016			112.016	0.73	30	15	15	1.21101	0.269014	-0.0279448	-0.758144
3.71_366.188			366.188	3.71	30	15	15	1.25677	0.457367	-0.0278933	-0.75771
5.17_614.177			614.177	5.17	30	15	15	1.29736	0.481842	-0.0279051	-0.757591
Arbutin/hydroquinone glucoside-like (FA)	Phenolic glycoside	C13H18O9	318.094	1.7	30	15	15	1.2248	0.474505	-0.0279008	-0.757323
1.67_304.079			304.079	1.67	30	15	15	1.25939	0.345767	-0.0279003	-0.757096
1.02_143.058			143.058	1.02	30	15	15	1.23309	0.412724	-0.0278676	-0.757006
2.58_616.109			616.109	2.58	30	15	15	1.28703	0.150696	-0.0278679	-0.756988
5.44_474.131			474.131	5.44	30	15	15	1.27746	0.483991	-0.0278782	-0.75697
4.65_258.089			258.089	4.65	30	15	15	1.20609	0.567698	-0.0278548	-0.756221
2_564.108			564.108	2	30	15	15	1.32813	0.196283	-0.0278323	-0.756038
2.36_408.084			408.084	2.36	30	15	15	1.21796	0.397744	-0.0278693	-0.755866
1.65_404.057			404.057	1.65	30	15	15	1.23003	0.283332	-0.0278381	-0.755473
4.49_498.267			498.267	4.49	30	15	15	1.25628	0.34494	-0.0278035	-0.755028
2.87_445.178			445.178	2.87	30	15	15	1.31177	0.10242	-0.0277845	-0.754779
4.44_338.198			338.198	4.44	30	15	15	1.2028	0.221499	-0.0278134	-0.75469
4.53_515.257			515.257	4.53	30	15	15	1.28569	0.450836	-0.0277834	-0.754562
3.04_588.113			588.113	3.04	30	15	15	1.27537	0.282014	-0.0277867	-0.754556
2.78_512.131			512.131	2.78	30	15	15	1.31855	0.114446	-0.0277708	-0.754281
3.15_466.111			466.111	3.15	29	14	15	1.2344	0.462097	-0.0278135	-0.753999
1.89_492.069			492.069	1.89	30	15	15	1.21694	0.557171	-0.0277811	-0.753971
3.3_706.303			706.303	3.3	30	15	15	1.28771	0.177359	-0.027751	-0.75373
3.05_546.135			546.135	3.05	30	15	15	1.31905	0.19311	-0.0277464	-0.753723
3.09_393.09			393.09	3.09	30	15	15	1.20955	0.326089	-0.0277716	-0.75366
2.89_526.168			526.168	2.89	27	13	14	1.19415	0.401157	-0.0276088	-0.752841
1.85_466.131			466.131	1.85	30	15	15	1.31816	0.239295	-0.0277071	-0.752668
2.31_404.131			404.131	2.31	30	15	15	1.21625	0.44022	-0.0277442	-0.752502
Catechol/Hydroquinone 4	Phenolic	C6H6O2	110.036	2.61	29	15	14	1.20645	0.594376	-0.0278961	-0.752203
2.46_166.062			166.062	2.46	30	15	15	1.19942	0.56307	-0.0277214	-0.752035
4.16_540.2			540.2	4.16	30	15	15	1.26631	0.432906	-0.0276995	-0.751829
1.82_454.994			454.994	1.82	30	15	15	1.25452	0.327466	-0.0276831	-0.751313
3.62_466.204			466.204	3.62	30	15	15	1.26122	0.158256	-0.0276696	-0.751263
3.78_334.164			334.164	3.78	30	15	15	1.25758	0.52633	-0.0276721	-0.751073
4.16_590.182			590.182	4.16	30	15	15	1.27144	0.369871	-0.0276592	-0.750863
Citric acid	Primary	C6H8O7	192.027	0.73	30	15	15	1.19996	0.274142	-0.0276714	-0.750743
4.02_500.244			500.244	4.02	24	14	10	1.11013	0.39564	-0.024878	-0.750664
1.6_352.1			352.1	1.6	30	15	15	1.21072	0.382863	-0.0276639	-0.750495
4.8_510.267			510.267	4.8	30	15	15	1.29117	0.296252	-0.02764	-0.750225
3.05_454.142			454.142	3.05	30	15	15	1.31859	0.118027	-0.0276193	-0.750184
1.62_430.042			430.042	1.62	30	15	15	1.21033	0.200605	-0.0276415	-0.749774
2.85_462.119			462.119	2.85	30	15	15	1.27126	0.329598	-0.0276039	-0.749764
1.46_380.041			380.041	1.46	30	15	15	1.26624	0.317325	-0.0275981	-0.749214
4.59_515.258			515.258	4.59	30	15	15	1.25178	0.598778	-0.0275817	-0.749179
3.67_505.12			505.12	3.67	30	15	15	1.21507	0.422654	-0.0275632	-0.748655
1.8_262.015			262.015	1.8	30	15	15	1.24462	0.221963	-0.0275574	-0.748596
3.32_466.159			466.159	3.32	30	15	15	1.31024	0.150528	-0.027553	-0.74858
3.32_476.189			476.189	3.32	30	15	15	1.30962	0.133058	-0.027496	-0.747017
1.02_101.048			101.048	1.02	30	15	15	1.21342	0.452584	-0.0274912	-0.746804
4.13_496.215			496.215	4.13	30	15	15	1.29099	0.354036	-0.0275014	-0.746801
3.55_718.281			718.281	3.55	30	15	15	1.23609	0.290793	-0.02752	-0.746796
3.9_462.206			462.206	3.9	28	15	13	1.32961	0.231461	-0.0288231	-0.746514
3.95_410.214			410.214	3.95	30	15	15	1.23363	0.172407	-0.02749	-0.746346
2_600.093			600.093	2	30	15	15	1.29088	0.249328	-0.0274674	-0.746128
3.65_508.121			508.121	3.65	30	15	15	1.23302	0.514422	-0.0274905	-0.74593
2_472.116			472.116	2	30	15	15	1.32328	0.269242	-0.0274442	-0.745699
1.66_280.116		C11H20O8	280.116	1.66	30	15	15	1.28689	0.27026	-0.0274193	-0.745023
Procyanidin pentamer 1	PA	C75H62O30	1442.33	2.7	29	15	14	1.22085	0.596307	-0.0281391	-0.744979
2.78_442.168			442.168	2.78	30	15	15	1.32662	0.12874	-0.0274157	-0.744791
3.65_410.138			410.138	3.65	25	14	11	1.25181	0.264347	-0.0270772	-0.744451
4.56_436.231			436.231	4.56	27	15	12	1.18701	0.51326	-0.0266238	-0.743923
3.43_288.063			288.063	3.43	30	15	15	1.23314	0.566221	-0.0273922	-0.743603
1.98_287.103			287.103	1.98	30	15	15	1.30505	0.188418	-0.0273667	-0.743505
2.23_482.163			482.163	2.23	30	15	15	1.31857	0.141393	-0.027362	-0.743501
3.48_606.168			606.168	3.48	30	15	15	1.24249	0.316791	-0.0273658	-0.743072
2.37_350.121			350.121	2.37	29	15	14	1.35134	0.247432	-0.0284976	-0.7429
2.6_577.635			577.635	2.6	29	15	14	1.23272	0.575286	-0.0282732	-0.742718
2.58_356.111			356.111	2.58	30	15	15	1.19154	0.321316	-0.0273505	-0.741657
3.65_400.211			400.211	3.65	30	15	15	1.28371	0.187597	-0.0272823	-0.74132
6.03_628.306			628.306	6.03	30	15	15	1.19324	0.463014	-0.0273015	-0.741305
2.81_208.071			208.071	2.81	30	15	15	1.21238	0.492304	-0.0272934	-0.741114
3.13_454.057			454.057	3.13	30	15	15	1.22862	0.277447	-0.0272995	-0.740881
3.73_208.073			208.073	3.73	30	15	15	1.27067	0.218779	-0.0272828	-0.740856
Dehydroquercetin 2	Flavonoid	C15H12O7	304.059	2.98	26	15	11	1.22779	0.327397	-0.0281548	-0.740236
2_579.064			579.064	2	30	15	15	1.29201	0.219561	-0.0272518	-0.740211
3.05_530.16			530.16	3.05	30	15	15	1.29687	0.146308	-0.0272495	-0.7402
3.25_458.197			458.197	3.25	30	15	15	1.28	0.107642	-0.0272396	-0.740008
3.32_430.183			430.183	3.32	30	15	15	1.30207	0.144468	-0.0272365	-0.739997
3.05_532.137			532.137	3.05	30	15	15	1.29305	0.169008	-0.0272405	-0.73996
Procyanidin tetramer 2	PA	C60H50O24	1154.27	2.6	30	15	15	1.18245	0.475561	-0.0272785	-0.739895
1.31_420.087			420.087	1.31	30	15	15	1.25958	0.289329	-0.0272401	-0.739642
4.53_488.238			488.238	4.53	30	15	15	1.27656	0.300805	-0.0272353	-0.739535
0.78_294.095			294.095	0.78	30	15	15	1.25102	0.39972	-0.0272311	-0.739524
2.86_472.158			472.158	2.86	30	15	15	1.20148	0.234321	-0.0272217	-0.738769
1.89_464.074			464.074	1.89	30	15	15	1.19848	0.310763	-0.0272192	-0.738677
4.73_496.251			496.251	4.73	30	15	15	1.27345	0.369469	-0.0272148	-0.738671
3.72_132.079			132.079	3.72	30	15	15	1.22929	0.413995	-0.0272093	-0.738627
5.8_543.256			543.256	5.8	30	15	15	1.20735	0.448951	-0.0271924	-0.738293
3.26_446.173			446.173	3.26	29	15	14	1.26569	0.242341	-0.0274654	-0.738243
1.55_351.099			351.099	1.55	30	15	15	1.28142	0.254195	-0.0271747	-0.73815
3.48_688.161			688.161	3.48	30	15	15	1.22355	0.392912	-0.0271867	-0.737965
2.87_452.145			452.145	2.87	23	12	11	1.24591	0.161877	-0.0259712	-0.737679
1.83_306.092			306.092	1.83	30	15	15	1.25532	0.284413	-0.0271671	-0.737505
3.05_504.142			504.142	3.05	30	15	15	1.29129	0.161777	-0.0271195	-0.73663
1.73_396.036			396.036	1.73	29	15	14	1.16842	0.415509	-0.0266122	-0.735732
3.48_592.173			592.173	3.48	30	15	15	1.22283	0.397494	-0.0271018	-0.735725
1.99_453.181			453.181	1.99	30	15	15	1.27141	0.171388	-0.0270831	-0.735619
1.61_312.142			312.142	1.61	30	15	15	1.2989	0.18098	-0.0270675	-0.735336
2.04_271.051			271.051	2.04	30	15	15	1.24988	0.288651	-0.0270696	-0.735273
0.73_86.037			86.037	0.73	30	15	15	1.17542	0.271441	-0.0271006	-0.735197
4.67_488.238			488.238	4.67	30	15	15	1.24969	0.4166	-0.0270718	-0.735192
2.97_452.226			452.226	2.97	30	15	15	1.20688	0.33861	-0.0270646	-0.734862
2.6_389.976			389.976	2.6	29	14	15	1.16833	0.513547	-0.0270219	-0.734848
5.78_503.3			503.3	5.78	30	15	15	1.20628	0.387685	-0.0270664	-0.734812
4.09_512.246			512.246	4.09	25	14	11	1.16599	0.350061	-0.0256444	-0.734742
2_522.116			522.116	2	30	15	15	1.28621	0.229256	-0.0270453	-0.734644
0.73_408.012			408.012	0.73	29	15	14	1.16847	0.159908	-0.0270075	-0.734513
Cinnamic acid 3	Phenolic	C9H8O2	148.052	3.73	30	15	15	1.26146	0.310873	-0.0270499	-0.734483
6.01_288.23			288.23	6.01	27	15	12	1.27247	0.268396	-0.0285828	-0.734123
3.48_1074.428			1074.43	3.48	30	15	15	1.2327	0.391385	-0.0270449	-0.73406
4.53_498.267			498.267	4.53	30	15	15	1.24546	0.332504	-0.0270236	-0.733793
4.16_538.223			538.223	4.16	30	15	15	1.26975	0.372808	-0.0270175	-0.733647
4.11_550.255			550.255	4.11	28	15	13	1.27367	0.297333	-0.0281056	-0.733516
5.78_563.322			563.322	5.78	30	15	15	1.20732	0.393179	-0.0270173	-0.733477
3.58_476.188			476.188	3.58	30	15	15	1.2216	0.364858	-0.0270169	-0.733351
2.91_340.172			340.172	2.91	30	15	15	1.24949	0.284611	-0.0269905	-0.733073
1.85_450.996			450.996	1.85	30	15	15	1.17003	0.609874	-0.0269967	-0.732908
0.73_290.944			290.944	0.73	30	15	15	1.16859	0.317094	-0.0270078	-0.732777
0.73_88.016			88.016	0.73	30	15	15	1.17231	0.225411	-0.0270003	-0.732407
2.29_346.125			346.125	2.29	30	15	15	1.26341	0.179936	-0.0269675	-0.732336
3.34_434.121			434.121	3.34	30	15	15	1.23159	0.173369	-0.0269632	-0.732286
4.61_436.231			436.231	4.61	27	14	13	1.16831	0.346411	-0.0262328	-0.732072
3.48_621.126			621.126	3.48	30	15	15	1.21089	0.285328	-0.0269662	-0.731998
4.4_462.244			462.244	4.4	28	15	13	1.25275	0.17468	-0.0271981	-0.731997
4.19_482.236			482.236	4.19	30	15	15	1.26874	0.233625	-0.0269495	-0.731798
Salicylic acid glucoside 1	SA derivative	C13H16O8	300.085	1.61	30	15	15	1.19176	0.308371	-0.026971	-0.731687
3.97_516.22			516.22	3.97	24	13	11	1.08845	0.367602	-0.0249917	-0.731581
2.22_358.126			358.126	2.22	29	15	14	1.20106	0.269285	-0.0271928	-0.731388
2.93_408.199			408.199	2.93	23	11	12	1.26514	0.250111	-0.0281754	-0.731357
2.36_662.096			662.096	2.36	30	15	15	1.17821	0.540495	-0.0269687	-0.731311
3.56_566.2			566.2	3.56	30	15	15	1.24702	0.288796	-0.0269218	-0.731119
3.29_600.204			600.204	3.29	30	15	15	1.16752	0.281983	-0.0269394	-0.730874
2.36_677.058			677.058	2.36	30	15	15	1.17001	0.343322	-0.0269236	-0.730075
6.06_506.266			506.266	6.06	30	15	15	1.17246	0.523481	-0.0268848	-0.729951
1.65_229.048			229.048	1.65	29	14	15	1.24508	0.24602	-0.0259195	-0.729944
1.85_422.044			422.044	1.85	30	15	15	1.16275	0.533079	-0.026871	-0.729545
2.23_436.158			436.158	2.23	30	15	15	1.29154	0.149301	-0.0268426	-0.729412
1.33_400.119			400.119	1.33	19	14	5	1.17118	0.47484	-0.0270785	-0.729341
0.73_218.024			218.024	0.73	30	15	15	1.1643	0.31281	-0.0268676	-0.729197
1.83_691.116			691.116	1.83	30	15	15	1.24487	0.154436	-0.0268692	-0.729191
3.32_400.212			400.212	3.32	30	15	15	1.20333	0.319548	-0.0268398	-0.728619
5.78_631.307			631.307	5.78	30	15	15	1.19344	0.380957	-0.026835	-0.728543
3.25_440.189			440.189	3.25	30	15	15	1.28133	0.121392	-0.0268048	-0.728287
1.96_468.146			468.146	1.96	30	15	15	1.26063	0.451132	-0.0268175	-0.728165
3.1_504.132			504.132	3.1	30	15	15	1.17447	0.295414	-0.0267761	-0.727445
4.38_338.193			338.193	4.38	30	15	15	1.16673	0.289351	-0.0268173	-0.727423
1.3_394.084			394.084	1.3	30	15	15	1.16378	0.480555	-0.026791	-0.727225
2_497.138			497.138	2	30	15	15	1.24067	0.332417	-0.0267807	-0.727169
Gallic acid	Phenolic	C7H6O5	170.021	1.34	30	15	15	1.15904	0.24671	-0.0267744	-0.72707
2.77_294.131			294.131	2.77	30	15	15	1.22946	0.29387	-0.0267639	-0.726716
2.87_418.157			418.157	2.87	30	15	15	1.28774	0.0829311	-0.026738	-0.726666
2.45_190.084			190.084	2.45	30	15	15	1.25957	0.217128	-0.0267526	-0.726381
Aconitate 1 (cis or trans)	Primary	C6H6O6	174.016	0.83	30	15	15	1.16121	0.491936	-0.0267673	-0.726367
2.61_328.047			328.047	2.61	30	15	15	1.15649	0.445879	-0.0267503	-0.725786
2.78_340.101			340.101	2.78	29	15	14	1.32988	0.17992	-0.0278754	-0.725747
4.5_496.251			496.251	4.5	30	15	15	1.20224	0.280589	-0.0266863	-0.724763
3.34_384.199			384.199	3.34	30	15	15	1.22197	0.335842	-0.0266715	-0.723889
1.26_314.121			314.121	1.26	30	15	15	1.23674	0.304777	-0.0266278	-0.723613
3.05_538.202			538.202	3.05	15	6	9	1.28927	0.139371	-0.0293397	-0.722995
3.32_544.176			544.176	3.32	30	15	15	1.26558	0.189441	-0.0266058	-0.722703
2.18_438.136			438.136	2.18	30	15	15	1.29581	0.156797	-0.0266049	-0.722692
4.59_490.236			490.236	4.59	30	15	15	1.21853	0.306722	-0.0265967	-0.722681
3.32_468.159			468.159	3.32	30	15	15	1.26869	0.1848	-0.026592	-0.722575
3.05_486.131			486.131	3.05	30	15	15	1.25389	0.199876	-0.0265898	-0.722258
2.52_466.111			466.111	2.52	30	15	15	1.16686	0.442133	-0.0266096	-0.722079
3.93_384.218			384.218	3.93	30	15	15	1.21249	0.288375	-0.0265584	-0.721602
3.48_636.202			636.202	3.48	30	15	15	1.19902	0.377072	-0.0265806	-0.721558
1.31_276.084			276.084	1.31	30	15	15	1.21355	0.232158	-0.0265679	-0.721299
0.73_436.965			436.965	0.73	30	15	15	1.15831	0.232437	-0.0265856	-0.721221
3.03_522.207			522.207	3.03	25	12	13	1.19412	0.379872	-0.0264819	-0.721153
5.5_474.365			474.365	5.5	24	15	9	1.28427	0.248775	-0.0288657	-0.720772
2.8_462.173			462.173	2.8	30	15	15	1.26081	0.253595	-0.0265344	-0.720667
3.12_584.21			584.21	3.12	30	15	15	1.17403	0.161279	-0.0265694	-0.720654
3.05_561.09			561.09	3.05	30	15	15	1.27054	0.190761	-0.0265284	-0.7206
3.05_514.142			514.142	3.05	30	15	15	1.28135	0.176352	-0.0265	-0.719941
Salirepin 1	Phenolic glycoside	C13H18O8	302.101	1.58	30	15	15	1.26854	0.194319	-0.0264971	-0.719748
Syringin 2	Sinapate derivative	C17H24O9	372.14	3.91	30	15	15	1.23825	0.486523	-0.0264854	-0.719411
3.23_682.179			682.179	3.23	30	15	15	1.14719	0.34135	-0.0265263	-0.719314
2_470.119			470.119	2	30	15	15	1.30297	0.255825	-0.0264538	-0.718831
3.59_392.11			392.11	3.59	30	15	15	1.1966	0.401299	-0.0264839	-0.718799
5.8_475.269			475.269	5.8	30	15	15	1.20329	0.514129	-0.0264641	-0.718605
1.75_362.119			362.119	1.75	30	15	15	1.20492	0.29512	-0.0264235	-0.717976
4.32_396.234			396.234	4.32	30	15	15	1.27384	0.332904	-0.0264382	-0.717813
2_550.112			550.112	2	30	15	15	1.26484	0.238878	-0.0264238	-0.717787
3.46_588.197			588.197	3.46	30	15	15	1.2178	0.473006	-0.0264465	-0.717643
1.65_80.026			80.026	1.65	30	15	15	1.27171	0.198495	-0.0263979	-0.71738
1.65_476.066			476.066	1.65	30	15	15	1.2726	0.215768	-0.0263835	-0.716984
2.6_388.055			388.055	2.6	30	15	15	1.14743	0.4955	-0.0263967	-0.716317
3.57_494.123			494.123	3.57	30	15	15	1.21303	0.317663	-0.0263859	-0.716163
4.17_470.236			470.236	4.17	30	15	15	1.24613	0.213042	-0.0263494	-0.71592
3.42_444.174			444.174	3.42	26	13	13	1.22686	0.301696	-0.0268447	-0.715447
6.11_560.319			560.319	6.11	30	15	15	1.14822	0.459608	-0.0263483	-0.715301
2.57_444.199			444.199	2.57	30	15	15	1.19674	0.488348	-0.0263223	-0.71497
3.16_372.106			372.106	3.16	30	15	15	1.17721	0.339554	-0.0263021	-0.714682
1.65_492.035			492.035	1.65	30	15	15	1.27198	0.240963	-0.0262984	-0.714639
3.27_400.212			400.212	3.27	30	15	15	1.17856	0.593435	-0.026326	-0.714422
5.24_628.193			628.193	5.24	30	15	15	1.21362	0.573412	-0.0263066	-0.714383
1.64_292.086			292.086	1.64	28	15	13	1.25407	0.540435	-0.0274968	-0.714324
3.45_538.203			538.203	3.45	15	9	6	1.13259	0.164639	-0.0259475	-0.714205
2.86_444.073			444.073	2.86	30	15	15	1.20185	0.354715	-0.0263147	-0.714142
3.25_508.187			508.187	3.25	23	8	15	1.21926	0.299191	-0.0254658	-0.714009
2_548.135			548.135	2	30	15	15	1.28097	0.251916	-0.0262598	-0.713511
3.17_346.125			346.125	3.17	24	15	9	1.30342	0.232101	-0.0289314	-0.713259
3.19_502.225			502.225	3.19	30	15	15	1.27739	0.287476	-0.0262593	-0.713104
Salicylic acid glucoside 2	SA derivative	C13H16O8	300.085	1.92	30	15	15	1.26763	0.392509	-0.0262349	-0.712994
1.39_372.066			372.066	1.39	30	15	15	1.23995	0.333512	-0.0262354	-0.712907
3.36_466.111			466.111	3.36	30	15	15	1.13481	0.372534	-0.0262405	-0.712141
3.2_588.114			588.114	3.2	30	15	15	1.18751	0.340468	-0.0262306	-0.711957
1.61_416.055			416.055	1.61	30	15	15	1.14053	0.40642	-0.0262404	-0.711652
Homogentisic acid/Hydroxymethoxybenzoic acid glucoside 1	Phenolic glycoside	C14H18O9	330.095	1.47	27	13	14	1.14878	0.336727	-0.0232227	-0.711517
3_288.157			288.157	3	30	15	15	1.20874	0.329855	-0.0261778	-0.710871
2_504.105			504.105	2	30	15	15	1.23338	0.247041	-0.0261684	-0.710813
Caffeoyl glucose 2	Phenolic glycoside	C15H18O9	342.095	2.67	30	15	15	1.19612	0.313909	-0.0261531	-0.709847
3.57_510.191			510.191	3.57	28	15	13	1.24757	0.375138	-0.0272687	-0.708736
Salicylic acid fr 1	SA derivative	C7H6O3	138.032	1.62	30	15	15	1.15327	0.277771	-0.0261221	-0.708581
2.87_382.184			382.184	2.87	30	15	15	1.25663	0.128655	-0.0260628	-0.708273
1.58_426.069			426.069	1.58	30	15	15	1.15226	0.406973	-0.0260775	-0.708174
2.87_428.189			428.189	2.87	30	15	15	1.25894	0.109432	-0.0260538	-0.708006
6.21_432.227			432.227	6.21	30	15	15	1.22944	0.349283	-0.0260756	-0.707953
3.46_552.22			552.22	3.46	30	15	15	1.192	0.49671	-0.0260832	-0.707751
0.91_240.067			240.067	0.91	30	15	15	1.25894	0.234044	-0.0260416	-0.707722
4.25_580.301			580.301	4.25	30	15	15	1.21144	0.324214	-0.0260491	-0.707227
4.17_464.225			464.225	4.17	30	15	15	1.17093	0.26492	-0.0260504	-0.707188
1.93_294.131			294.131	1.93	24	15	9	1.13232	0.538714	-0.0258998	-0.707059
3.1_548.12			548.12	3.1	30	15	15	1.15879	0.227093	-0.026004	-0.706598
3.32_380.168			380.168	3.32	30	15	15	1.23412	0.112297	-0.0259789	-0.706155
2.94_388.136			388.136	2.94	30	15	15	1.13425	0.316321	-0.0260096	-0.706057
3.42_340.173			340.173	3.42	30	15	15	1.23299	0.201339	-0.0259804	-0.706032
3.29_345.133			345.133	3.29	30	15	15	1.14206	0.264415	-0.0260198	-0.70594
3.46_615.215			615.215	3.46	30	15	15	1.16577	0.490462	-0.0260241	-0.705859
3.32_518.158			518.158	3.32	30	15	15	1.23773	0.259606	-0.0259346	-0.704598
3.03_260.126			260.126	3.03	30	15	15	1.20103	0.303178	-0.0259277	-0.704053
1.85_420.067			420.067	1.85	30	15	15	1.12736	0.548529	-0.0259141	-0.703489
3.49_426.062			426.062	3.49	30	15	15	1.15884	0.30636	-0.0259333	-0.703401
3.14_282.075			282.075	3.14	30	15	15	1.14564	0.419126	-0.0258943	-0.703026
3.25_396.199			396.199	3.25	30	15	15	1.20606	0.387444	-0.0258734	-0.702858
Salicylic acid glucoside 1 (FA)	SA derivative	C14H18O10	346.09	1.62	30	15	15	1.15262	0.258519	-0.0258994	-0.702644
1.15_422.141			422.141	1.15	30	15	15	1.14428	0.323915	-0.0258829	-0.702481
3.58_498.23			498.23	3.58	30	15	15	1.25129	0.347391	-0.0258541	-0.702434
3.39_450.08			450.08	3.39	30	15	15	1.18405	0.563277	-0.0258735	-0.702374
3.32_528.161			528.161	3.32	30	15	15	1.27747	0.160454	-0.0258507	-0.702303
1.47_222.056			222.056	1.47	30	15	15	1.25778	0.256751	-0.0258439	-0.702157
5.74_582.188			582.188	5.74	30	15	15	1.16505	0.557667	-0.0258619	-0.701766
2.69_316.094			316.094	2.69	30	15	15	1.15752	0.357227	-0.025858	-0.701523
1.46_488.173			488.173	1.46	30	15	15	1.20694	0.528978	-0.0258027	-0.700988
3.84_384.142			384.142	3.84	29	14	15	1.23237	0.391778	-0.0259149	-0.700874
3.46_598.225			598.225	3.46	30	15	15	1.18374	0.498576	-0.0258267	-0.700823
3.29_432.192			432.192	3.29	30	15	15	1.23227	0.28266	-0.0257898	-0.700805
3.1_588.114			588.114	3.1	30	15	15	1.15581	0.349232	-0.0258281	-0.700767
4.53_452.262			452.262	4.53	30	15	15	1.20004	0.332008	-0.0257884	-0.700476
3.5_536.186			536.186	3.5	30	15	15	1.15049	0.359974	-0.0258201	-0.700307
2.76_392.127			392.127	2.76	29	15	14	1.2544	0.181427	-0.0261925	-0.700079
3.61_342.076			342.076	3.61	30	15	15	1.12997	0.314567	-0.0257971	-0.699979
3.48_484.212			484.212	3.48	30	15	15	1.17717	0.292689	-0.0257497	-0.699415
2.87_512.148			512.148	2.87	30	15	15	1.26333	0.179714	-0.0257336	-0.699245
2.73_526.168			526.168	2.73	30	15	15	1.14562	0.30415	-0.0257736	-0.699144
3.67_437.132			437.132	3.67	30	15	15	1.14555	0.421155	-0.02573	-0.69894
3.16_290.174			290.174	3.16	30	15	15	1.15802	0.392675	-0.0257355	-0.698891
3.34_320.146			320.146	3.34	30	15	15	1.1987	0.627321	-0.0257323	-0.69877
3.7_394.183			394.183	3.7	29	14	15	1.10486	0.570417	-0.0253365	-0.698218
3_210.051			210.051	3	30	15	15	1.21827	0.434283	-0.0257054	-0.697942
1.31_306.107			306.107	1.31	30	15	15	1.20122	0.231787	-0.0256854	-0.697423
4.26_528.274			528.274	4.26	30	15	15	1.20616	0.287864	-0.0256696	-0.697407
Procyanidin tetramer 3	PA	C60H50O24	1154.27	2.97	30	15	15	1.13177	0.625476	-0.0257157	-0.697235
0.73_130.027			130.027	0.73	30	15	15	1.11416	0.427859	-0.0256812	-0.696747
3.31_436.193			436.193	3.31	30	15	15	1.12604	0.337218	-0.0256685	-0.696642
2.73_536.152			536.152	2.73	30	15	15	1.15641	0.286502	-0.0256612	-0.696512
1.65_478.043			478.043	1.65	30	15	15	1.24699	0.237518	-0.0256227	-0.696362
3.61_103.993			103.993	3.61	30	15	15	1.11916	0.336894	-0.0256607	-0.696331
1.65_139.063			139.063	1.65	30	15	15	1.25965	0.205824	-0.0256064	-0.695948
3.57_494.125			494.125	3.57	30	15	15	1.18575	0.276556	-0.0256341	-0.695901
2.61_353.075			353.075	2.61	30	15	15	1.1091	0.350709	-0.0256491	-0.695691
3.43_262.093			262.093	3.43	19	9	10	1.06831	0.571861	-0.0245194	-0.695633
1.65_97.053			97.053	1.65	30	15	15	1.25343	0.215763	-0.0255793	-0.695206
1.65_141.043			141.043	1.65	30	15	15	1.2535	0.2215	-0.0255736	-0.695121
6.17_506.265			506.265	6.17	30	15	15	1.12823	0.474225	-0.0256002	-0.695095
4.26_538.172			538.172	4.26	30	15	15	1.1442	0.400571	-0.0255986	-0.694908
3.13_265.095			265.095	3.13	30	15	15	1.18295	0.33168	-0.0255758	-0.694333
3.85_434.121			434.121	3.85	30	15	15	1.11768	0.392774	-0.0255795	-0.694037
3.58_408.199			408.199	3.58	30	15	15	1.16981	0.317411	-0.025564	-0.693764
Procyanidin trimer 3	PA	C45H38O18	866.205	2.58	30	15	15	1.12165	0.566132	-0.025572	-0.693495
4.26_552.239			552.239	4.26	30	15	15	1.1953	0.268975	-0.0255277	-0.693427
0.83_86.037			86.037	0.83	30	15	15	1.12502	0.332321	-0.0255416	-0.692926
1.84_378.116			378.116	1.84	30	15	15	1.14492	0.689294	-0.0255205	-0.692677
1.84_332.111			332.111	1.84	30	15	15	1.14402	0.678148	-0.0255154	-0.692461
3.65_132.079			132.079	3.65	30	15	15	1.12854	0.452631	-0.0254958	-0.691966
3.29_590.195			590.195	3.29	30	15	15	1.10264	0.27247	-0.0255051	-0.691685
2.87_480.157			480.157	2.87	30	15	15	1.25109	0.112674	-0.0254427	-0.691286
1.55_380.088			380.088	1.55	29	15	14	1.2165	0.355181	-0.0257903	-0.69084
Procyanidin dimer 1	PA	C30H26O12	578.142	2.36	30	15	15	1.10446	0.547937	-0.0254652	-0.690685
4.44_514.262			514.262	4.44	30	15	15	1.20293	0.527803	-0.0254155	-0.690606
4.16_487.225			487.225	4.16	30	15	15	1.17894	0.356481	-0.0254231	-0.690395
Isopropylmalate-like 4		C7H12O5	176.069	2.18	29	15	14	1.27584	0.17438	-0.0258832	-0.689565
3.07_344.111			344.111	3.07	30	15	15	1.21969	0.301577	-0.0253556	-0.688767
3.29_1090.423			1090.42	3.29	30	15	15	1.09688	0.273287	-0.0253722	-0.688253
3.06_450.116			450.116	3.06	30	15	15	1.09736	0.458197	-0.0253799	-0.688189
3.6_438.099			438.099	3.6	26	14	12	1.25174	0.434133	-0.0268598	-0.68812
3.61_164.014			164.014	3.61	30	15	15	1.11288	0.379586	-0.0253517	-0.68791
1.65_336.106			336.106	1.65	30	15	15	1.22554	0.270821	-0.0253235	-0.687873
3.62_416.203			416.203	3.62	30	15	15	1.18818	0.419197	-0.0252962	-0.687478
3.09_390.188			390.188	3.09	30	15	15	1.20596	0.250025	-0.0253145	-0.687363
Procyanidin dimer 3	PA	C30H26O12	578.141	2.91	29	15	14	1.11458	0.412334	-0.0255106	-0.687005
Mevalonic acid 1	MVA	C6H12O4	148.073	1.41	30	15	15	1.0953	0.382318	-0.0253042	-0.686727
3.23_630.215			630.215	3.23	30	15	15	1.10626	0.351724	-0.0253214	-0.686723
5.29_696.08			696.08	5.29	30	15	15	1.16242	0.53737	-0.0252981	-0.686659
3.09_312.085			312.085	3.09	30	15	15	1.13471	0.40131	-0.025282	-0.686141
4.25_484.252			484.252	4.25	30	15	15	1.19816	0.238977	-0.0252517	-0.686103
3.46_682.176			682.176	3.46	30	15	15	1.14724	0.544802	-0.025283	-0.685946
0.83_130.027			130.027	0.83	30	15	15	1.0935	0.644945	-0.0252843	-0.685895
0.73_229.977			229.977	0.73	30	15	15	1.09545	0.325727	-0.0252722	-0.685378
2.61_312.061			312.061	2.61	25	14	11	1.1123	0.535731	-0.0254233	-0.685271
6.38_562.334			562.334	6.38	30	15	15	1.12033	0.439419	-0.0252404	-0.685208
1.65_95.037			95.037	1.65	30	15	15	1.24954	0.206792	-0.0252039	-0.685015
1.75_309.061			309.061	1.75	29	14	15	1.19411	0.109163	-0.024218	-0.684926
2.6_312.082			312.082	2.6	30	15	15	1.13415	0.353041	-0.0252264	-0.684692
3.05_424.177			424.177	3.05	29	15	14	1.22223	0.431294	-0.0256031	-0.684398
3.14_598.224			598.224	3.14	30	15	15	1.09538	0.528251	-0.025236	-0.684321
2.55_434.142			434.142	2.55	30	15	15	1.21848	0.324247	-0.025202	-0.684286
3.92_432.198			432.198	3.92	30	15	15	1.17409	0.334865	-0.0251778	-0.683894
0.73_422.005			422.005	0.73	30	15	15	1.09998	0.275431	-0.0252135	-0.683839
2_629.198			629.198	2	28	13	15	1.06311	0.209667	-0.0240719	-0.683683
3.1_304.153			304.153	3.1	30	15	15	1.16677	0.254326	-0.0251666	-0.683528
3.07_428.188			428.188	3.07	30	15	15	1.23457	0.224954	-0.0251652	-0.683439
2.92_490.168			490.168	2.92	30	15	15	1.24732	0.166592	-0.0251398	-0.68306
Dihydroxybenzoic acid 2	Phenolic	C7H6O4	154.027	1.67	30	15	15	1.08893	0.567571	-0.0251697	-0.683048
1.25_210.055			210.055	1.25	30	15	15	1.14892	0.392946	-0.0251372	-0.682732
Deoxyhexopyranose 3		C6H12O5	164.068	3.36	30	15	15	1.11571	0.444106	-0.0251489	-0.682532
5.83_722.371			722.371	5.83	30	15	15	1.13859	0.407327	-0.0251192	-0.681961
2.02_744.266			744.266	2.02	30	15	15	1.12649	0.398491	-0.0250866	-0.68172
2.39_469.142			469.142	2.39	30	15	15	1.21586	0.273017	-0.025085	-0.681624
2.87_548.134			548.134	2.87	29	15	14	1.24663	0.129957	-0.0255479	-0.68161
1.65_555.098			555.098	1.65	30	15	15	1.20557	0.291892	-0.0250886	-0.681541
3.8_658.224			658.224	3.8	30	15	15	1.15978	0.306011	-0.0251026	-0.681108
3.45_714.271			714.271	3.45	30	15	15	1.21055	0.396665	-0.0250648	-0.680945
5.65_460.152			460.152	5.65	30	15	15	1.15668	0.444765	-0.0250843	-0.680862
3.22_636.19			636.19	3.22	30	15	15	1.08565	0.376929	-0.0251099	-0.680836
3.72_468.223			468.223	3.72	30	15	15	1.12924	0.378842	-0.0250597	-0.680631
3.25_502.226			502.226	3.25	30	15	15	1.11548	0.401699	-0.0250794	-0.680615
1.31_396.033			396.033	1.31	30	15	15	1.08518	0.42023	-0.025068	-0.680549
3.67_448.101			448.101	3.67	30	15	15	1.08502	0.522021	-0.0250866	-0.680474
4.25_536.221			536.221	4.25	30	15	15	1.19643	0.302085	-0.0250605	-0.680374
3.31_392.203			392.203	3.31	30	15	15	1.1987	0.257899	-0.0250331	-0.679979
2.93_339.13			339.13	2.93	30	15	15	1.17929	0.358027	-0.0250255	-0.679796
4.49_224.105			224.105	4.49	30	15	15	1.19745	0.327644	-0.025031	-0.679686
0.77_204.027			204.027	0.77	30	15	15	1.17576	0.511723	-0.0250131	-0.679684
2.23_550.149			550.149	2.23	30	15	15	1.22608	0.125349	-0.0250072	-0.679622
1.39_449.002			449.002	1.39	30	15	15	1.18124	0.339141	-0.0249989	-0.679547
2.81_344.11			344.11	2.81	30	15	15	1.10975	0.28272	-0.025032	-0.679173
3.67_748.29			748.29	3.67	30	15	15	1.15923	0.481529	-0.0250068	-0.678333
3.52_476.189			476.189	3.52	30	15	15	1.15315	0.241062	-0.0249735	-0.678216
Hypoxanthine-like		C5H4N4O	136.038	2.81	30	15	15	1.08867	0.524867	-0.0250036	-0.678153
1.31_369.091			369.091	1.31	27	14	13	1.15753	0.39426	-0.0259604	-0.678063
Coniferin	Coniferyl alcohol derivative	C16H22O8	342.13	3.58	30	15	15	1.10835	0.320236	-0.02499	-0.67805
3.45_668.266			668.266	3.45	30	15	15	1.21522	0.341542	-0.0249555	-0.678012
3.08_432.197			432.197	3.08	30	15	15	1.16647	0.38079	-0.024971	-0.677977
4.93_496.173			496.173	4.93	30	15	15	1.17496	0.399377	-0.0249716	-0.677889
3.42_454.205			454.205	3.42	30	15	15	1.1787	0.543074	-0.0249591	-0.677683
6.11_550.291			550.291	6.11	30	15	15	1.09163	0.381132	-0.024955	-0.677457
1.65_111.068			111.068	1.65	30	15	15	1.23619	0.205651	-0.0249189	-0.677329
3.25_442.205			442.205	3.25	30	15	15	1.217	0.120603	-0.0249141	-0.677161
3.07_474.083			474.083	3.07	30	15	15	1.12053	0.470959	-0.0249624	-0.677118
3.23_552.22			552.22	3.23	30	15	15	1.0796	0.426984	-0.0249619	-0.676846
1.77_134.058			134.058	1.77	27	15	12	1.07621	0.737637	-0.0246687	-0.676704
3.21_426.207			426.207	3.21	30	15	15	1.20878	0.0929785	-0.0248796	-0.676211
3.52_440.224			440.224	3.52	30	15	15	1.25515	0.161771	-0.0248829	-0.676075
2.35_332.111			332.111	2.35	29	15	14	1.25162	0.270144	-0.0253676	-0.675939
5.25_774.229			774.229	5.25	30	15	15	1.20372	0.270826	-0.02488	-0.675731
3.47_404.166			404.166	3.47	30	15	15	1.16503	0.434883	-0.0248439	-0.675122
3.77_578.201			578.201	3.77	30	15	15	1.07593	0.60424	-0.0248785	-0.67472
0.73_233.994			233.994	0.73	30	15	15	1.07583	0.250538	-0.0248614	-0.674698
0.69_338.085			338.085	0.69	30	15	15	1.19557	0.425143	-0.0248309	-0.674666
5.29_620.164			620.164	5.29	30	15	15	1.16387	0.402831	-0.0248477	-0.674432
Phenol fr 7	Phenolic	C6H6O	94.042	5.29	30	15	15	1.18717	0.387298	-0.0248279	-0.674068
1.66_267.005			267.005	1.66	30	15	15	1.1722	0.346755	-0.0248046	-0.673721
4.11_482.235			482.235	4.11	30	15	15	1.18109	0.387692	-0.0248004	-0.673676
Isopropylmalate-like 3		C7H12O5	176.068	2	30	15	15	1.21311	0.154775	-0.0247662	-0.673194
Dihydroxybenzoic acid 1	Phenolic	C7H6O4	154.027	1.51	30	15	15	1.09432	0.51173	-0.0247842	-0.672942
3.29_832.313			832.313	3.29	30	15	15	1.08891	0.297186	-0.0247888	-0.672711
2.4_412.996			412.996	2.4	29	15	14	1.15532	0.196492	-0.0248429	-0.672278
2.46_470.199			470.199	2.46	26	15	11	1.22522	0.290555	-0.0259885	-0.671748
4.67_566.254			566.254	4.67	30	15	15	1.14788	0.360811	-0.0247159	-0.671464
Procyanidin trimer 1	PA	C45H38O18	866.204	1.68	30	15	15	1.09146	0.565894	-0.0247483	-0.670955
3.29_1097.328			1097.33	3.29	30	15	15	1.06976	0.243766	-0.0247358	-0.670894
1.65_570.054			570.054	1.65	30	15	15	1.1846	0.346246	-0.0246853	-0.670605
3.88_424.23			424.23	3.88	29	15	14	1.14861	0.456765	-0.0245414	-0.67058
3.36_516.239			516.239	3.36	30	15	15	1.24697	0.158406	-0.0246279	-0.669441
4.15_518.2			518.2	4.15	30	15	15	1.22649	0.110241	-0.0246133	-0.668782
1.39_420.048			420.048	1.39	30	15	15	1.19927	0.278554	-0.0245999	-0.668694
1.31_602.205			602.205	1.31	26	14	12	1.05275	0.396859	-0.0238465	-0.668613
3.32_500.148			500.148	3.32	30	15	15	1.17294	0.301571	-0.0246003	-0.668135
2.87_420.158			420.158	2.87	30	15	15	1.20652	0.144194	-0.0245781	-0.668051
Procyanidin tetramer 1	PA	C60H50O24	1154.27	2.25	30	15	15	1.07223	0.6105	-0.0246186	-0.667692
1.97_314.1		C14H18O8	314.1	1.97	30	15	15	1.21065	0.268314	-0.0245569	-0.667546
5.29_698.084			698.084	5.29	30	15	15	1.12882	0.617312	-0.0245868	-0.667349
1.65_326.965			326.965	1.65	30	15	15	1.20848	0.419428	-0.0245452	-0.667131
2.38_426.094			426.094	2.38	30	15	15	1.08599	0.508473	-0.0246008	-0.667068
5.29_520.209			520.209	5.29	30	15	15	1.18191	0.386833	-0.0245674	-0.666904
5.29_661.179			661.179	5.29	30	15	15	1.1702	0.384293	-0.0245683	-0.666879
3.52_566.199			566.199	3.52	30	15	15	1.07504	0.2498	-0.0245692	-0.666488
2.69_526.168			526.168	2.69	30	15	15	1.10987	0.330054	-0.0245522	-0.66619
3.25_512.168			512.168	3.25	30	15	15	1.2214	0.302243	-0.0245	-0.66577
3.16_404.167			404.167	3.16	30	15	15	1.10691	0.603465	-0.0245051	-0.665088
2.22_412.096			412.096	2.22	28	14	14	1.2073	0.221657	-0.0246364	-0.665018
1.6_308.113			308.113	1.6	30	15	15	1.21139	0.172488	-0.0244781	-0.665008
2.47_432.162			432.162	2.47	29	15	14	1.22079	0.250409	-0.0249174	-0.664583
3.21_376.114			376.114	3.21	29	14	15	1.13079	0.547279	-0.0255308	-0.664553
3.66_434.12			434.12	3.66	30	15	15	1.11921	0.366913	-0.0244648	-0.664328
4.16_523.147			523.147	4.16	30	15	15	1.13721	0.558155	-0.0244774	-0.664146
2.61_604.113			604.113	2.61	29	15	14	1.05817	0.672032	-0.0243825	-0.663656
2.72_390.199			390.199	2.72	30	15	15	1.20151	0.222719	-0.024417	-0.663475
3.31_282.075			282.075	3.31	30	15	15	1.08544	0.386819	-0.0244496	-0.663283
2.46_442.109			442.109	2.46	29	15	14	1.0567	0.699266	-0.0236842	-0.662535
3.29_606.167			606.167	3.29	30	15	15	1.06416	0.263497	-0.024423	-0.662516
3.37_500.246			500.246	3.37	30	15	15	1.19143	0.182931	-0.0243733	-0.661906
3.49_674.154			674.154	3.49	30	15	15	1.08659	0.338656	-0.0243846	-0.661863
3.21_489.204			489.204	3.21	19	14	5	1.15026	0.226489	-0.0244826	-0.66183
2.12_340.027			340.027	2.12	29	15	14	1.12109	0.383686	-0.0241707	-0.661182
2.39_444.121			444.121	2.39	29	15	14	1.19461	0.344728	-0.0242399	-0.660837
3.46_630.214			630.214	3.46	30	15	15	1.12775	0.463467	-0.0243491	-0.660685
2.95_434.177			434.177	2.95	29	15	14	1.18544	0.27921	-0.024727	-0.66065
3.52_580.21			580.21	3.52	30	15	15	1.13965	0.276396	-0.0243368	-0.66044
3.65_359.122			359.122	3.65	30	15	15	1.21914	0.290917	-0.0242929	-0.660314
2.69_414.173			414.173	2.69	30	15	15	1.20151	0.192023	-0.0242864	-0.660211
3.08_118.062			118.062	3.08	30	15	15	1.06461	0.773817	-0.0243066	-0.659726
3.26_492.184			492.184	3.26	30	15	15	1.20386	0.120404	-0.0242427	-0.658911
3.95_550.212			550.212	3.95	29	15	14	1.12597	0.239306	-0.0235293	-0.658911
3.32_530.105			530.105	3.32	30	15	15	1.16646	0.304127	-0.0242403	-0.658689
1.65_310.996			310.996	1.65	30	15	15	1.17403	0.42052	-0.0242397	-0.658543
2.53_356.167			356.167	2.53	30	15	15	1.19698	0.265833	-0.0242258	-0.658404
3.23_598.225			598.225	3.23	30	15	15	1.05168	0.457729	-0.0242754	-0.658261
Cinnamoyl glucose 2	Phenolic glycoside	C15H18O7	310.105	3.36	30	15	15	1.06636	0.405022	-0.0242522	-0.658207
3.32_546.153			546.153	3.32	30	15	15	1.1956	0.193012	-0.0242221	-0.658188
3.24_500.246			500.246	3.24	30	15	15	1.20196	0.51252	-0.0242197	-0.658003
Procyanidin trimer 5	PA	C45H38O18	866.204	2.97	30	15	15	1.05266	0.5568	-0.0242527	-0.657958
2.9_516.147			516.147	2.9	30	15	15	1.19429	0.294769	-0.0241885	-0.657427
1.65_252.063			252.063	1.65	30	15	15	1.12163	0.706493	-0.0241947	-0.657145
1.72_470.162			470.162	1.72	30	15	15	1.19574	0.415438	-0.0241783	-0.656973
1.2_331.127			331.127	1.2	30	15	15	1.07397	0.560989	-0.0241765	-0.656812
5.06_932.287			932.287	5.06	30	15	15	1.17153	0.386506	-0.0241775	-0.656436
5.29_478.162			478.162	5.29	30	15	15	1.15915	0.422082	-0.0241722	-0.656155
3.28_406.178			406.178	3.28	30	15	15	1.05047	0.56003	-0.0241805	-0.655732
5.88_475.269			475.269	5.88	30	15	15	1.09199	0.406499	-0.0241461	-0.655657
4.43_578.236			578.236	4.43	30	15	15	1.20008	0.449674	-0.024131	-0.655372
1.73_338.119			338.119	1.73	30	15	15	1.14931	0.434698	-0.0241283	-0.655205
1.31_296.111			296.111	1.31	30	15	15	1.04312	0.530745	-0.0241297	-0.655115
3.73_336.178			336.178	3.73	30	15	15	1.08605	0.376427	-0.0241495	-0.655108
2.58_368.168			368.168	2.58	30	15	15	1.20412	0.194275	-0.0240806	-0.654345
5.29_634.16			634.16	5.29	30	15	15	1.16068	0.396296	-0.0241045	-0.654324
2.73_358.126			358.126	2.73	30	15	15	1.04206	0.61344	-0.0241057	-0.654258
4.74_452.26			452.26	4.74	30	15	15	1.14173	0.41381	-0.0240794	-0.653866
1.91_456.184			456.184	1.91	30	15	15	1.20536	0.274976	-0.0240638	-0.653849
5.29_666.169			666.169	5.29	30	15	15	1.13616	0.320016	-0.024082	-0.653674
1.85_440.061			440.061	1.85	30	15	15	1.11139	0.602402	-0.0240839	-0.653468
1.42_304.079			304.079	1.42	30	15	15	1.2251	0.246125	-0.0240347	-0.653464
0.92_189.063			189.063	0.92	30	15	15	1.0475	0.41567	-0.0240841	-0.653167
3.49_464.095			464.095	3.49	30	15	15	1.04182	0.609156	-0.0240828	-0.653012
2.69_640.161			640.161	2.69	30	15	15	1.09084	0.364588	-0.0240677	-0.652982
3.45_492.197			492.197	3.45	28	14	14	1.0721	0.436769	-0.0241457	-0.652868
2.39_442.123			442.123	2.39	30	15	15	1.18439	0.268555	-0.0240037	-0.652282
5.29_636.155			636.155	5.29	30	15	15	1.15596	0.350828	-0.024004	-0.651623
2.83_380.167			380.167	2.83	30	15	15	1.12252	0.397948	-0.023997	-0.650969
Caffeoyl quinic acid	Quinic acid derivative	C16H18O9	354.095	2.71	30	15	15	1.03673	0.485441	-0.0239792	-0.650833
1.73_324.142			324.142	1.73	30	15	15	1.03862	0.581785	-0.0239466	-0.650544
Coumaric acid glucoside 2 (FA)	Phenolic glycoside	C16H20O10	372.106	2.71	30	15	15	1.03975	0.614072	-0.0239729	-0.650535
Prodelphinidin dimer 2	PA	C30H26O14	610.131	1.62	30	15	15	1.03715	0.589166	-0.0239662	-0.650426
2.52_312.085			312.085	2.52	30	15	15	1.08603	0.383912	-0.0239525	-0.650397
4.93_730.187			730.187	4.93	30	15	15	1.15993	0.304633	-0.0239401	-0.64997
2.74_314.1		C14H18O8	314.1	2.74	30	15	15	1.16017	0.26445	-0.0238768	-0.648666
3.46_668.195			668.195	3.46	30	15	15	1.09843	0.50423	-0.0238902	-0.648206
3.58_434.085			434.085	3.58	30	15	15	1.06109	0.409681	-0.0238879	-0.648071
4.93_616.193			616.193	4.93	30	15	15	1.13995	0.32602	-0.0238705	-0.647962
1.39_404.003			404.003	1.39	30	15	15	1.12965	0.30994	-0.0238069	-0.647276
1.31_366.074			366.074	1.31	30	15	15	1.03149	0.518991	-0.0238405	-0.647122
5.34_914.277			914.277	5.34	30	15	15	1.13974	0.436818	-0.0238378	-0.647059
3.29_622.131			622.131	3.29	30	15	15	1.03465	0.270889	-0.0238532	-0.647059
2.76_448.157			448.157	2.76	30	15	15	1.22299	0.190104	-0.0237953	-0.646802
5.1_674.199			674.199	5.1	30	15	15	1.09898	0.707777	-0.0238148	-0.646328
Quinic acid 2	Quinic acid derivative	C7H12O6	192.064	2.71	30	15	15	1.02882	0.507606	-0.0237979	-0.645847
1.68_452.149			452.149	1.68	30	15	15	1.17052	0.360145	-0.0237379	-0.644957
2.87_527.105			527.105	2.87	30	15	15	1.18376	0.138445	-0.023712	-0.644394
1.31_306.095			306.095	1.31	30	15	15	1.12092	0.313229	-0.0237329	-0.644335
2.66_409.043			409.043	2.66	30	15	15	1.13714	0.125821	-0.0237311	-0.644168
3.02_456.069			456.069	3.02	30	15	15	1.05082	0.538737	-0.0237433	-0.644054
0.69_338.084			338.084	0.69	30	15	15	1.13253	0.430705	-0.023695	-0.644011
3.22_374.1			374.1	3.22	30	15	15	1.03045	0.582094	-0.0237293	-0.643756
3.45_536.186			536.186	3.45	30	15	15	1.06349	0.4797	-0.0237343	-0.643692
3.17_556.177			556.177	3.17	30	15	15	1.0421	0.665779	-0.0237054	-0.643039
2.44_338.157			338.157	2.44	30	15	15	1.10128	0.300576	-0.0236538	-0.642962
0.73_148.037			148.037	0.73	30	15	15	1.02572	0.353574	-0.0236823	-0.642704
5.29_712.176			712.176	5.29	30	15	15	1.13786	0.439131	-0.0236624	-0.642313
2.58_414.173			414.173	2.58	30	15	15	1.18983	0.242116	-0.0236234	-0.642095
4.25_554.215			554.215	4.25	30	15	15	1.08622	0.464791	-0.0236315	-0.641662
3.01_430.156			430.156	3.01	30	15	15	1.08721	0.392114	-0.0236008	-0.641375
5.29_598.184			598.184	5.29	30	15	15	1.13019	0.44481	-0.0235989	-0.640593
2.72_590.256			590.256	2.72	30	15	15	1.09622	0.418047	-0.023559	-0.640534
2.89_212.032			212.032	2.89	30	15	15	1.05467	0.296855	-0.0235842	-0.64049
1.65_541.1			541.1	1.65	30	15	15	1.12724	0.324891	-0.0235803	-0.640414
2.1_473.164			473.164	2.1	30	15	15	1.10554	0.370776	-0.0235534	-0.640129
2.1_438.137			438.137	2.1	30	15	15	1.20476	0.262226	-0.0235466	-0.63965
3.06_644.23			644.23	3.06	30	15	15	1.0967	0.43337	-0.0235605	-0.639432
5.29_460.153			460.153	5.29	30	15	15	1.12901	0.518819	-0.0235509	-0.639303
2.6_424.058			424.058	2.6	30	15	15	1.02216	0.502992	-0.02355	-0.639115
2.83_282.074			282.074	2.83	30	15	15	1.02437	0.522702	-0.0235632	-0.63908
3.46_650.182			650.182	3.46	30	15	15	1.08358	0.549196	-0.0235317	-0.638648
3.21_472.215			472.215	3.21	30	15	15	1.15967	0.100278	-0.0234725	-0.638144
3.39_596.209			596.209	3.39	30	15	15	1.0679	0.50075	-0.0234874	-0.637433
3.56_340.132			340.132	3.56	30	15	15	1.15999	0.218278	-0.0234506	-0.637286
2.33_418.11			418.11	2.33	30	15	15	1.17511	0.338863	-0.0234522	-0.637105
1.68_679.194			679.194	1.68	30	15	15	1.15696	0.354605	-0.0234174	-0.636607
1.97_326.157			326.157	1.97	30	15	15	1.20541	0.183884	-0.0234171	-0.635984
1.39_434.037			434.037	1.39	30	15	15	1.16786	0.26771	-0.0233855	-0.635821
1.43_686.189			686.189	1.43	30	15	15	1.08142	0.623838	-0.0233867	-0.635747
6.1_628.306			628.306	6.1	30	15	15	1.01527	0.547785	-0.0234145	-0.635677
2.73_364.116			364.116	2.73	30	15	15	1.06332	0.35835	-0.0234324	-0.635607
5.26_630.206			630.206	5.26	30	15	15	1.14193	0.293758	-0.0234003	-0.635381
3.21_540.196			540.196	3.21	30	15	15	1.1645	0.102253	-0.0233686	-0.635194
2.09_414.173			414.173	2.09	30	15	15	1.05655	0.621392	-0.0233743	-0.634763
1.39_90.031			90.031	1.39	30	15	15	1.10985	0.438417	-0.0233239	-0.634194
Procyanidin trimer 2	PA	C45H38O18	866.204	2.46	30	15	15	1.02779	0.42279	-0.0233885	-0.634103
1.75_273.085			273.085	1.75	30	15	15	1.1961	0.133042	-0.0233021	-0.633572
1.73_344.112			344.112	1.73	29	14	15	1.05475	0.380615	-0.0222173	-0.63312
1.6_406.099			406.099	1.6	30	15	15	1.01118	0.453151	-0.0232735	-0.63222
3.03_454.056			454.056	3.03	30	15	15	1.08586	0.42112	-0.023294	-0.63193
4.48_528.272			528.272	4.48	30	15	15	1.0339	0.512965	-0.0232606	-0.630982
2.15_482.163			482.163	2.15	30	15	15	1.17632	0.238845	-0.023207	-0.63087
3.51_555.211			555.211	3.51	18	11	7	1.15707	0.332644	-0.0264385	-0.630667
1.65_183.053			183.053	1.65	30	15	15	1.17	0.205615	-0.0231923	-0.630499
1.33_324.106			324.106	1.33	30	15	15	1.02678	0.387687	-0.0232271	-0.630435
3.14_408.105			408.105	3.14	30	15	15	1.0225	0.423805	-0.0232311	-0.630181
2.87_470.158			470.158	2.87	29	15	14	1.16662	0.13558	-0.0234516	-0.63013
6.1_577.309			577.309	6.1	29	15	14	1.01449	0.551405	-0.0234312	-0.629086
2.87_450.119			450.119	2.87	30	15	15	1.0148	0.330586	-0.0231728	-0.628589
2.79_510.155			510.155	2.79	30	15	15	1.18265	0.156388	-0.0231275	-0.628359
1.75_111.032			111.032	1.75	30	15	15	1.18295	0.193376	-0.0231107	-0.628346
1.09_296.069			296.069	1.09	30	15	15	1.06156	0.320857	-0.023149	-0.628224
2.04_191.061			191.061	2.04	30	15	15	1.09614	0.780942	-0.0231304	-0.628059
2.19_414.173			414.173	2.19	30	15	15	1.16535	0.344196	-0.0230968	-0.627778
1.09_486.152			486.152	1.09	29	14	15	1.101	0.254856	-0.0232053	-0.627297
1.35_382.058			382.058	1.35	30	15	15	1.16755	0.216961	-0.0230819	-0.626701
2.93_604.108			604.108	2.93	30	15	15	1.03842	0.493331	-0.0230944	-0.62668
4.69_616.193			616.193	4.69	30	15	15	1.10541	0.329866	-0.023083	-0.626526
2.18_376.184			376.184	2.18	30	15	15	1.08985	0.302461	-0.0230493	-0.626408
2.8_469.134			469.134	2.8	30	15	15	1.14583	0.177022	-0.0230436	-0.626402
6.1_724.386			724.386	6.1	30	15	15	1.09107	0.300524	-0.0230614	-0.62623
3.25_207.089			207.089	3.25	30	15	15	1.07819	0.558173	-0.0230499	-0.626213
2.74_131.095			131.095	2.74	30	15	15	1.05781	0.667597	-0.0230425	-0.626181
1.39_350.085			350.085	1.39	30	15	15	1.13233	0.42345	-0.0230271	-0.625805
2.26_271.052			271.052	2.26	30	15	15	1.15768	0.283532	-0.0230087	-0.625376
2.39_452.153			452.153	2.39	30	15	15	1.16408	0.172579	-0.0229807	-0.624614
3.51_398.161			398.161	3.51	30	15	15	1.01768	0.427462	-0.0230174	-0.624418
3.44_534.173			534.173	3.44	30	15	15	1.08398	0.333021	-0.0230061	-0.624252
2_629.046			629.046	2	30	15	15	1.09689	0.285728	-0.0229769	-0.623959
4.13_569.153			569.153	4.13	30	15	15	1.01935	0.714234	-0.0229172	-0.622139
2.15_436.157			436.157	2.15	30	15	15	1.15789	0.206288	-0.0228821	-0.622002
2.22_344.111			344.111	2.22	30	15	15	1.12833	0.29592	-0.0228638	-0.621293
5.88_543.256			543.256	5.88	30	15	15	1.03505	0.476656	-0.022872	-0.621083
2.39_406.147			406.147	2.39	30	15	15	1.14773	0.168243	-0.0228463	-0.62101
2.85_448.101			448.101	2.85	29	15	14	1.00967	0.673462	-0.0232979	-0.620583
3.1_328.11			328.11	3.1	30	15	15	1.08482	0.305051	-0.0228362	-0.620311
2.96_466.168			466.168	2.96	30	15	15	1.11597	0.393048	-0.0228091	-0.619838
4.25_494.234			494.234	4.25	30	15	15	1.06811	0.400504	-0.0228205	-0.61972
2.76_408.099			408.099	2.76	30	15	15	1.1466	0.192196	-0.022804	-0.619417
1.57_364.096			364.096	1.57	30	15	15	1.00978	0.504533	-0.0227801	-0.618712
Phenylalanine fr 3		C9H11NO2	165.079	3.25	30	15	15	1.09786	0.494884	-0.0227646	-0.618272
1.72_424.157			424.157	1.72	30	15	15	1.14809	0.412956	-0.022746	-0.618233
4.48_526.261			526.261	4.48	30	15	15	1.07333	0.396198	-0.02274	-0.618059
2.96_302.136			302.136	2.96	30	15	15	1.0643	0.37578	-0.0227261	-0.616969
4.16_494.195			494.195	4.16	30	15	15	1.06305	0.770937	-0.0227227	-0.616862
3.09_480.219			480.219	3.09	30	15	15	1.03982	0.259334	-0.0227254	-0.61686
1.65_517.142			517.142	1.65	30	15	15	1.15337	0.300175	-0.0226902	-0.616774
6.02_724.386			724.386	6.02	30	15	15	1.09501	0.295207	-0.0226677	-0.615682
2.8_479.163			479.163	2.8	30	15	15	1.16939	0.195806	-0.0226275	-0.615089
2.71_308.147			308.147	2.71	30	15	15	1.0104	0.458747	-0.0226259	-0.614784
3.77_430.183			430.183	3.77	30	15	15	1.0591	0.216109	-0.022541	-0.612531
3.44_342.112			342.112	3.44	30	15	15	1.0975	0.2396	-0.0225671	-0.612408
1.63_654.235			654.235	1.63	30	15	15	1.06435	0.625886	-0.0225469	-0.612138
5.27_568.172			568.172	5.27	30	15	15	1.06926	0.33173	-0.022536	-0.611792
1.65_227.043			227.043	1.65	30	15	15	1.14205	0.213287	-0.0224915	-0.611529
Salicylic acid fr 8	SA derivative	C7H6O3	138.032	5.29	30	15	15	1.09135	0.342929	-0.0225124	-0.611207
2.8_340.173			340.173	2.8	30	15	15	1.10497	0.432557	-0.022506	-0.61115
5.96_594.28			594.28	5.96	30	15	15	1.0411	0.283767	-0.022487	-0.6104
5.82_519.258			519.258	5.82	30	15	15	1.17349	0.216562	-0.0224532	-0.61001
1.65_1148.045			1148.05	1.65	30	15	15	1.16113	0.179204	-0.0224254	-0.609851
2.8_433.157			433.157	2.8	30	15	15	1.15907	0.207073	-0.0224299	-0.609708
5.83_294.219			294.219	5.83	30	15	15	1.08422	0.346908	-0.0224648	-0.609622
3.46_372.154			372.154	3.46	30	15	15	1.03076	0.65834	-0.0224078	-0.608264
2.87_496.176			496.176	2.87	30	15	15	1.14676	0.114947	-0.0223714	-0.608143
0.55_550.173			550.173	0.55	30	15	15	1.00396	0.529629	-0.0224055	-0.608136
2.76_428.189			428.189	2.76	30	15	15	1.04941	0.358048	-0.0223804	-0.608134
2.87_498.157			498.157	2.87	30	15	15	1.14741	0.160557	-0.0223547	-0.607707
3.12_601.198			601.198	3.12	30	15	15	1.10207	0.290338	-0.0223064	-0.605985
2.99_492.182			492.182	2.99	30	15	15	1.07756	0.379149	-0.0222976	-0.605865
3.14_204.1			204.1	3.14	30	15	15	1.15633	0.364776	-0.0222947	-0.605549
1.66_297.006			297.006	1.66	30	15	15	1.06133	0.394087	-0.0222869	-0.605367
2.77_588.113			588.113	2.77	30	15	15	1.02076	0.521174	-0.0222892	-0.604919
1.24_320.075			320.075	1.24	30	15	15	1.08634	0.421288	-0.0222496	-0.604807
1.65_290.1			290.1	1.65	30	15	15	1.144	0.385545	-0.0222545	-0.604744
1.02_222.056			222.056	1.02	29	15	14	1.15819	0.322324	-0.0227462	-0.603997
3.04_436.193			436.193	3.04	30	15	15	1.06755	0.420012	-0.0222293	-0.603789
1.09_353.017			353.017	1.09	30	15	15	1.04627	0.308587	-0.0222102	-0.602781
1.65_539.124			539.124	1.65	30	15	15	1.12064	0.386236	-0.0221378	-0.601498
4.17_522.206			522.206	4.17	27	14	13	1.11434	0.569731	-0.0230521	-0.601475
Hydroxycinnamic acid/Coniferoyl aldehyde 2	Coniferyl alcohol derivative	C10H10O3	178.062	3.6	30	15	15	1.04089	0.553642	-0.0221462	-0.60103
3.32_575.106			575.106	3.32	30	15	15	1.10903	0.201418	-0.0220519	-0.599417
1.11_240.067			240.067	1.11	30	15	15	1.12467	0.158437	-0.0220204	-0.598806
3.04_308.147			308.147	3.04	30	15	15	1.08125	0.304457	-0.0219924	-0.597896
3.56_634.185			634.185	3.56	30	15	15	1.00662	0.532156	-0.0219915	-0.59728
1.65_633.11			633.11	1.65	30	15	15	1.11757	0.262013	-0.021968	-0.59688
2.97_384.198			384.198	2.97	28	14	14	1.16895	0.323966	-0.022116	-0.595579
6.29_432.227			432.227	6.29	30	15	15	1.03587	0.3984	-0.0219337	-0.59544
3.46_718.171			718.171	3.46	30	15	15	1.00992	0.566052	-0.0219085	-0.594298
2.97_482.105			482.105	2.97	30	15	15	1.03193	0.468664	-0.0218706	-0.593367
3.64_174.089			174.089	3.64	30	15	15	1.08722	0.342009	-0.0218236	-0.59288
2.68_294.131			294.131	2.68	30	15	15	1.03166	0.549155	-0.0217991	-0.592381
3.2_400.212			400.212	3.2	30	15	15	1.12443	0.289971	-0.0217629	-0.591492
1.09_324.064			324.064	1.09	30	15	15	1.01754	0.337017	-0.0217777	-0.591068
2.01_882.262			882.262	2.01	30	15	15	1.05856	0.30581	-0.0217039	-0.590037
1.58_375.115			375.115	1.58	30	15	15	1.10487	0.402825	-0.0217014	-0.589474
1.06_268.062			268.062	1.06	30	15	15	1.09841	0.277286	-0.0216752	-0.589126
3.42_580.181			580.181	3.42	30	15	15	1.05226	0.522812	-0.0216565	-0.587904
3.64_348.178			348.178	3.64	30	15	15	1.09031	0.257776	-0.0216205	-0.587379
1.56_412.067			412.067	1.56	30	15	15	1.09271	0.560936	-0.0215668	-0.586018
2.66_310.126			310.126	2.66	30	15	15	1.15293	0.172617	-0.0215337	-0.585542
Coumaric acid glucoside 3 (FA)	Phenolic glycoside	C16H20O10	372.106	2.91	29	15	14	1.03069	0.363209	-0.021645	-0.58549
2.79_396.163			396.163	2.79	30	15	15	1.1242	0.292125	-0.0215351	-0.585406
5.26_914.277			914.277	5.26	30	15	15	1.07206	0.462933	-0.0215123	-0.584045
2_532.116			532.116	2	30	15	15	1.17074	0.193162	-0.0214765	-0.583809
4.91_368.222			368.222	4.91	30	15	15	1.01865	0.434552	-0.0213952	-0.581609
2.2_111.032			111.032	2.2	29	14	15	1.0401	0.553637	-0.0214885	-0.580261
1.25_356.132			356.132	1.25	30	15	15	1.02469	0.499226	-0.0212546	-0.578021
3.41_582.23			582.23	3.41	30	15	15	1.03235	0.537005	-0.0212833	-0.577695
3.41_628.234			628.234	3.41	30	15	15	1.01539	0.566732	-0.0212768	-0.577389
1.53_416.091			416.091	1.53	30	15	15	1.02873	0.374061	-0.0212191	-0.576041
3.27_642.143			642.143	3.27	30	15	15	1.05252	0.305812	-0.0212168	-0.576008
3.19_510.227			510.227	3.19	30	15	15	1.14793	0.260607	-0.0211707	-0.575798
2.05_458.199			458.199	2.05	30	15	15	1.12954	0.317982	-0.0210332	-0.571777
1.68_498.158			498.158	1.68	30	15	15	1.09477	0.394003	-0.0209483	-0.569356
3.54_366.189			366.189	3.54	19	11	8	1.06539	0.60941	-0.0231656	-0.56933
1.09_440.147			440.147	1.09	30	15	15	1.01682	0.43937	-0.02097	-0.569216
2.76_394.104			394.104	2.76	30	15	15	1.04304	0.305488	-0.0209469	-0.568853
1.09_469.1			469.1	1.09	30	15	15	1.00133	0.427489	-0.0209249	-0.567936
5.83_276.208			276.208	5.83	30	15	15	1.048	0.369503	-0.0208117	-0.56471
1.28_290.11			290.11	1.28	30	15	15	1.00068	0.436062	-0.0208054	-0.564615
2.66_380.09			380.09	2.66	30	15	15	1.06904	0.188773	-0.0207901	-0.56451
2.39_522.116			522.116	2.39	30	15	15	1.08303	0.200748	-0.0207154	-0.563078
5.13_914.277			914.277	5.13	30	15	15	1.04451	0.391238	-0.020687	-0.561733
2.98_336.142			336.142	2.98	30	15	15	1.08468	0.346678	-0.020615	-0.560174
1.06_122.004			122.004	1.06	30	15	15	1.06411	0.329835	-0.0205979	-0.559637
Anthranilic acid	ANT	C7H7NO2	137.048	1.66	30	15	15	1.01032	0.412535	-0.020579	-0.55926
2.01_448.121			448.121	2.01	30	15	15	1.01658	0.4104	-0.0205693	-0.559216
3.04_378.11			378.11	3.04	30	15	15	1.02913	0.345846	-0.0205584	-0.559071
3.16_486.23			486.23	3.16	30	15	15	1.09161	0.407179	-0.0205238	-0.55769
1.64_603.177			603.177	1.64	30	15	15	1.08975	0.268008	-0.0203937	-0.554189
4.42_526.261			526.261	4.42	30	15	15	1.01947	0.334222	-0.0203424	-0.553036
2.1_392.131			392.131	2.1	30	15	15	1.07193	0.346629	-0.0203361	-0.55245
5.31_630.206			630.206	5.31	30	15	15	1.02682	0.606051	-0.0203354	-0.552408
2.88_466.167			466.167	2.88	30	15	15	1.09209	0.190102	-0.0202914	-0.551934
1.59_336.106			336.106	1.59	30	15	15	1.06147	0.231893	-0.0202532	-0.550287
2.85_510.154			510.154	2.85	30	15	15	1.05114	0.322457	-0.0201582	-0.548047
1.08_254.101			254.101	1.08	30	15	15	1.02064	0.395016	-0.0200911	-0.545366
3.03_407.064			407.064	3.03	30	15	15	1.05901	0.360502	-0.0200409	-0.544959
3.56_562.261			562.261	3.56	30	15	15	1.05936	0.320145	-0.019997	-0.543747
4.83_338.115			338.115	4.83	30	15	15	1.05899	0.326446	-0.02002	-0.543683
1.09_358.979			358.979	1.09	30	15	15	1.01493	0.345576	-0.0199898	-0.542603
0.85_365.086			365.086	0.85	28	15	13	1.08581	0.454908	-0.0215341	-0.541561
2.99_320.147			320.147	2.99	27	14	13	1.00869	0.394949	-0.0212675	-0.540798
1.97_360.105			360.105	1.97	30	15	15	1.0903	0.38675	-0.0198015	-0.53849
5.22_284.117			284.117	5.22	30	15	15	1.00734	0.183197	-0.0197708	-0.536899
2.39_494.121			494.121	2.39	30	15	15	1.0592	0.152003	-0.0196373	-0.533851
3.69_452.078			452.078	3.69	26	15	11	1.01024	0.333486	-0.0210715	-0.533514
1.51_340.136			340.136	1.51	30	15	15	1.01571	0.296447	-0.0195116	-0.530784
1.93_383.106			383.106	1.93	30	15	15	1.04039	0.209653	-0.0193332	-0.525585
3.23_286.141			286.141	3.23	30	15	15	1.03256	0.238875	-0.0193349	-0.525539
2.39_551.068			551.068	2.39	30	15	15	1.03622	0.199293	-0.0192641	-0.523751
3.44_468.173			468.173	3.44	30	15	15	1.04809	0.402446	-0.0191417	-0.520295
1.41_370.147			370.147	1.41	30	15	15	1.00253	0.366614	-0.0190673	-0.5181
1.41_486.117			486.117	1.41	30	15	15	1.02403	0.233075	-0.0190592	-0.518022
2.67_496.177			496.177	2.67	30	15	15	1.07172	0.346885	-0.0189671	-0.515465
3.07_131.095			131.095	3.07	30	15	15	1.02155	0.332833	-0.018831	-0.511577
3.01_394.183			394.183	3.01	30	15	15	1.08116	0.257991	-0.0187896	-0.511225
2.39_520.139			520.139	2.39	30	15	15	1.00036	0.236818	-0.0185299	-0.50386
3.01_440.189			440.189	3.01	30	15	15	1.06561	0.2321	-0.0182275	-0.495699
2.73_446.177			446.177	2.73	30	15	15	1.04772	0.355054	-0.018102	-0.492214
6.39_530.308			530.308	6.39	30	15	15	1.04407	0.286317	-0.0179594	-0.488007
3.51_712.256			712.256	3.51	30	15	15	1.04129	0.1898	-0.0176168	-0.47952
2.66_378.113			378.113	2.66	30	15	15	1.00077	0.273144	-0.017518	-0.476476
2.62_472.214			472.214	2.62	24	15	9	1.04458	0.134776	-0.0177884	-0.4755
1.92_354.152			354.152	1.92	28	14	14	1.03914	0.412955	-0.0178898	-0.464593
6.06_1152.655			1152.66	6.06	25	10	15	1.0266	0.978659	0.0174816	0.386943
6.14_1040.605			1040.6	6.14	25	10	15	1.04987	0.816943	0.0180527	0.412752
0.92_215.925			215.925	0.92	23	8	15	1.00216	0.610727	0.0187003	0.461808
6.13_521.275			521.275	6.13	30	15	15	1.0684	0.761917	0.0191368	0.51863
1.37_135.054			135.054	1.37	30	15	15	1.00212	0.836386	0.0191726	0.520017
3.98_438.21			438.21	3.98	30	15	15	1.00692	0.703572	0.0196759	0.532556
6.08_412.203			412.203	6.08	20	5	15	1.12032	0.519009	0.0224822	0.540859
3.71_482.199			482.199	3.71	28	13	15	1.01365	0.528578	0.0217735	0.561733
6.06_1084.67			1084.67	6.06	30	15	15	1.06556	0.920761	0.0208648	0.565536
3.59_470.197			470.197	3.59	30	15	15	1.00798	0.742182	0.0214399	0.581121
3.93_580.264			580.264	3.93	28	13	15	1.01795	0.4645	0.0223595	0.583624
4_552.202			552.202	4	30	15	15	1.04721	0.521715	0.0216805	0.586922
4.75_330.24			330.24	4.75	30	15	15	1.12255	0.696139	0.0217745	0.59065
6.16_545.272			545.272	6.16	30	15	15	1.04179	0.939322	0.0221694	0.601048
4.2_336.177			336.177	4.2	19	4	15	1.10071	0.671148	0.0226682	0.601699
6.07_1064.603			1064.6	6.07	27	12	15	1.15047	0.939139	0.024054	0.602565
2.61_785.155			785.155	2.61	30	15	15	1.0188	0.93242	0.0222143	0.602566
6.08_280.24			280.24	6.08	30	15	15	1.13366	0.993083	0.0223957	0.607102
1.15_663.107			663.107	1.15	30	15	15	1.04162	0.86586	0.02241	0.60771
3.25_456.184			456.184	3.25	30	15	15	1.12087	0.639199	0.0225271	0.610233
4.01_474.187			474.187	4.01	29	14	15	1.1091	0.53021	0.0230816	0.611812
1.59_538.123			538.123	1.59	30	15	15	1.02935	0.456569	0.0226197	0.614434
1.59_281.049			281.049	1.59	20	5	15	1.08536	0.419445	0.0221032	0.622724
3.24_322.162			322.162	3.24	30	15	15	1.0098	0.461927	0.0230043	0.623845
4.01_501.205			501.205	4.01	29	14	15	1.08433	0.684771	0.023497	0.626562
5.79_508.338			508.338	5.79	19	4	15	1.09285	0.630418	0.023993	0.628295
Succinic acid	Primary	C4H6O4	118.027	0.92	30	15	15	1.09855	0.613758	0.0232264	0.630202
6.08_545.272			545.272	6.08	30	15	15	1.11629	0.94545	0.023267	0.630579
0.52_427.029			427.029	0.52	30	15	15	1.1054	0.845308	0.023362	0.633795
6.08_577.21			577.21	6.08	30	15	15	1.12475	0.907489	0.023657	0.641302
1.73_160.074			160.074	1.73	26	11	15	1.19856	0.867966	0.0247398	0.643036
Dihydrophaseic acid	DPA	C15H22O5	282.146	3.48	25	10	15	1.09119	0.677281	0.0242824	0.643409
2.12_288.048			288.048	2.12	29	14	15	1.06566	0.438418	0.0236967	0.643494
0.92_74.037			74.037	0.92	30	15	15	1.11665	0.606655	0.023732	0.643928
6.15_294.218			294.218	6.15	30	15	15	1.06137	0.711924	0.0239979	0.65147
0.92_100.016		C4H4O3	100.016	0.92	30	15	15	1.07891	0.487332	0.0240464	0.652501
Tyrosine	Aromatic amino acid	C9H11NO3	181.074	1.06	30	15	15	1.10465	0.623375	0.024099	0.654196
0.98_152.033			152.033	0.98	26	11	15	1.15516	0.631175	0.0247903	0.655182
1.52_326.119			326.119	1.52	30	15	15	1.1589	0.722716	0.0243426	0.659628
1.81_227.043			227.043	1.81	26	11	15	1.04692	0.334024	0.024038	0.660154
2.12_334.048			334.048	2.12	30	15	15	1.09535	0.393719	0.0243621	0.661053
2.12_117.058		C8H7N	117.058	2.12	30	15	15	1.08153	0.30651	0.0244129	0.662464
0.92_1039.027			1039.03	0.92	28	13	15	1.17514	0.525627	0.025779	0.663186
1.42_257.138			257.138	1.42	29	14	15	1.15686	0.516871	0.0253611	0.670411
0.77_164.032			164.032	0.77	27	12	15	1.11036	0.655393	0.0250836	0.671048
6.08_380.196			380.196	6.08	25	10	15	1.14705	0.571455	0.0239115	0.671169
6.08_477.286			477.286	6.08	30	15	15	1.19917	0.953778	0.0248231	0.672991
5.46_308.198			308.198	5.46	18	3	15	1.08148	0.380498	0.0248651	0.677781
3.94_568.177			568.177	3.94	27	12	15	1.1667	0.73591	0.0245076	0.679054
1.59_295.038			295.038	1.59	30	15	15	1.17103	0.59862	0.0251539	0.682621
2.12_272.077			272.077	2.12	30	15	15	1.119	0.350513	0.0252294	0.684609
3.65_551.876			551.876	3.65	28	13	15	1.07986	0.382698	0.0243153	0.687199
5.88_652.38			652.38	5.88	16	4	12	1.04094	0.46336	0.023824	0.688991
6.07_996.616			996.616	6.07	30	15	15	1.22235	0.913435	0.0254998	0.691298
0.77_139.027			139.027	0.77	27	12	15	1.09776	0.523039	0.0253353	0.692981
2.18_297.089			297.089	2.18	29	14	15	1.23383	0.806807	0.0255288	0.693233
Tryptophan	Trp/auxin metabolism	C11H12N2O2	204.09	2.12	30	15	15	1.13461	0.355226	0.0256905	0.697127
1.59_233.065			233.065	1.59	26	11	15	1.14711	0.463748	0.0251533	0.701038
2.63_216.148			216.148	2.63	30	15	15	1.16487	0.558851	0.0259536	0.703781
2.82_456.104			456.104	2.82	30	15	15	1.22649	0.777928	0.0260954	0.707723
3.93_205.955			205.955	3.93	19	5	14	1.08331	0.169034	0.0250187	0.70816
2.12_350.02			350.02	2.12	29	14	15	1.1673	0.411464	0.0261937	0.711084
3.68_482.141			482.141	3.68	27	12	15	1.12084	0.520983	0.0258422	0.711837
1.83_312.142		C12H24O9	312.142	1.83	28	13	15	1.15782	0.46686	0.0265037	0.712527
2.18_343.095			343.095	2.18	30	15	15	1.2587	0.760032	0.0262863	0.712667
6.08_561.246			561.246	6.08	30	15	15	1.20586	0.83413	0.0263736	0.715401
3.44_526.197			526.197	3.44	23	8	15	1.13121	0.475464	0.0259085	0.722981
1.84_339.095			339.095	1.84	30	15	15	1.17872	0.469946	0.0269302	0.730221
4.14_295.851			295.851	4.14	23	8	15	1.11128	0.230943	0.0256717	0.732053
1.74_202.132			202.132	1.74	30	15	15	1.21323	0.624826	0.0270335	0.733193
2.18_135.054			135.054	2.18	30	15	15	1.29434	0.772724	0.027103	0.734781
0.7_347.062			347.062	0.7	30	15	15	1.24638	0.674738	0.027207	0.738217
3.68_414.152		C19H26O10	414.152	3.68	18	3	15	1.10203	0.0830056	0.0254155	0.740072
Coumaric acid 3	Phenolic	C9H8O3	164.046	3.41	25	11	14	1.15318	0.435265	0.0264588	0.743835
3.63_458.218			458.218	3.63	30	15	15	1.19045	0.563123	0.0274032	0.743967
4.2_352.173		C15H28O9	352.173	4.2	30	15	15	1.23571	0.564201	0.027463	0.74407
5.17_326.201			326.201	5.17	22	7	15	1.30884	0.765939	0.0288027	0.760397
5.66_310.215		C18H30O4	310.215	5.66	30	15	15	1.28251	0.637646	0.0281964	0.765121
1.36_359.089			359.089	1.36	30	15	15	1.27186	0.736919	0.0284464	0.771639
0.77_95.037			95.037	0.77	30	15	15	1.26651	0.37725	0.0286476	0.777083
4.19_202.12			202.12	4.19	30	15	15	1.29291	0.487057	0.0287117	0.779092
3.57_145.053			145.053	3.57	30	15	15	1.27527	0.558184	0.0288807	0.783776
6.07_815.565			815.565	6.07	28	13	15	1.37083	0.718335	0.0293359	0.785053
0.76_363.058			363.058	0.76	30	15	15	1.29713	0.613416	0.0289607	0.785698
0.77_94.052			94.052	0.77	30	15	15	1.27887	0.355501	0.0290013	0.786759
0.55_102.032		C4H6O3	102.032	0.55	30	15	15	1.30745	0.495938	0.0291546	0.79092
0.54_605.076			605.076	0.54	30	15	15	1.27409	0.619063	0.0292273	0.793282
5.59_312.23		C18H32O4	312.23	5.59	30	15	15	1.33901	0.630474	0.0292613	0.794041
6.08_296.235		C18H32O3	296.235	6.08	30	15	15	1.36278	0.607773	0.0293864	0.797182
1.4_143.058			143.058	1.4	29	14	15	1.32679	0.546456	0.0297374	0.806788
1.57_253.058			253.058	1.57	30	15	15	1.33862	0.581027	0.0298878	0.810545
1.58_253.071			253.071	1.58	25	10	15	1.33201	0.520751	0.0299327	0.813466
1.59_311.009			311.009	1.59	28	13	15	1.33447	0.518942	0.0299447	0.814011
6.08_294.219		C18H30O3	294.219	6.08	30	15	15	1.37862	0.638293	0.0300287	0.814677
3.98_484.215			484.215	3.98	30	15	15	1.34841	0.517882	0.0301587	0.817467
4.45_389.825			389.825	4.45	28	13	15	1.28295	0.34896	0.0296686	0.82043
Phenylalanine	Aromatic amino acid	C9H11NO2	165.079	1.59	30	15	15	1.35996	0.438397	0.0304918	0.827484
6.08_364.222			364.222	6.08	30	15	15	1.39514	0.5357	0.030722	0.833375
0.55_145.038			145.038	0.55	30	15	15	1.37443	0.570124	0.0307637	0.834849
4.2_420.161			420.161	4.2	29	14	15	1.34582	0.463181	0.0308514	0.835392
3.16_456.184		C18H32O13	456.184	3.16	30	15	15	1.3566	0.583646	0.031043	0.842209
4.2_342.144			342.144	4.2	28	13	15	1.36716	0.440603	0.0315373	0.85253
3.65_412.214			412.214	3.65	30	15	15	1.43916	0.568989	0.0328013	0.889207
3.06_322.163		C14H26O8	322.163	3.06	30	15	15	1.42609	0.366896	0.0329147	0.892793
2.52_130.063		C6H10O3	130.063	2.52	28	13	15	1.50546	0.478864	0.0340343	0.894948
5.89_296.235		C18H32O3	296.235	5.89	30	15	15	1.47965	0.57894	0.0333419	0.904416
4.06_200.105		C10H16O4	200.105	4.06	23	8	15	1.46842	0.391371	0.033678	0.912214
3.28_392.127			392.127	3.28	28	13	15	1.48957	0.492058	0.0341729	0.926033
3.28_324.142		C13H24O9	324.142	3.28	30	15	15	1.49724	0.508785	0.0342183	0.92783
2.96_180.062			180.062	2.96	30	15	15	0.999294	0.795046	-0.02303	-0.624931
2.68_166.027			166.027	2.68	30	15	15	0.9989	0.62296	-0.0229417	-0.622539
1.09_403			403	1.09	30	15	15	0.99843	0.343033	-0.0218108	-0.591928
Salicylic acid fr 7	SA derivative	C7H6O3	138.032	4.7	30	15	15	0.996746	0.60394	-0.0213293	-0.578803
0.77_270.078			270.078	0.77	30	15	15	0.996161	0.404724	-0.0178831	-0.486507
5.56_896.267			896.267	5.56	30	15	15	0.995101	0.691297	-0.0208267	-0.565376
Cinnamic acid 1	Phenolic	C9H8O2	148.053	1.58	30	15	15	0.99443	0.551437	-0.0226965	-0.616522
1.1_374.046			374.046	1.1	30	15	15	0.993994	0.326218	-0.02174	-0.590168
1.57_296.111			296.111	1.57	30	15	15	0.993871	0.551983	-0.0227505	-0.617981
Dihydroxybenzoic acid 3	Phenolic	C7H6O4	154.026	1.83	30	15	15	0.992331	0.548691	-0.0226993	-0.616429
2.14_360.105			360.105	2.14	30	15	15	0.992275	0.597584	-0.0224986	-0.610342
3.59_425.188			425.188	3.59	18	3	15	0.988561	0.335959	0.0228005	0.611436
4.2_498.23			498.23	4.2	30	15	15	0.986843	0.343743	-0.0190379	-0.517948
1.23_472.178			472.178	1.23	30	15	15	0.985411	0.328809	-0.0182195	-0.49471
3.11_480.122			480.122	3.11	30	15	15	0.985022	0.646494	-0.0222021	-0.602276
1.41_416.151			416.151	1.41	30	15	15	0.984175	0.400562	-0.0182997	-0.497307
6.08_976.551			976.551	6.08	22	7	15	0.984027	0.885405	0.0186845	0.465245
1.54_204.062			204.062	1.54	30	15	15	0.984026	0.220528	-0.019586	-0.531555
4.17_425.233			425.233	4.17	29	14	15	0.982289	0.785846	-0.0226664	-0.616819
6.16_477.285			477.285	6.16	30	15	15	0.982284	0.940244	0.0200672	0.544251
1.65_238.96			238.96	1.65	30	15	15	0.981986	0.383854	-0.0177552	-0.482992
4.17_554.203			554.203	4.17	30	15	15	0.981647	0.516364	-0.0222487	-0.603642
0.64_262.079			262.079	0.64	29	15	14	0.981603	0.745923	-0.0226512	-0.602667
3.14_483.173			483.173	3.14	27	12	15	0.980981	0.371536	-0.0163628	-0.45197
0.65_208.058			208.058	0.65	30	15	15	0.980575	0.428962	-0.0208713	-0.566683
1.15_541.061			541.061	1.15	30	15	15	0.978728	0.954919	0.0195869	0.530743
5.56_776.246			776.246	5.56	30	15	15	0.978252	0.301196	-0.0191326	-0.519512
Phenol fr 6	Phenolic	C6H6O	94.042	4.7	30	15	15	0.97723	0.489831	-0.0204127	-0.553961
1.25_282			282	1.25	30	15	15	0.977107	0.454128	-0.0210788	-0.57233
3.76_678.245			678.245	3.76	27	13	14	0.976887	0.448991	-0.0224296	-0.637344
0.92_262.949			262.949	0.92	30	15	15	0.976673	0.710086	0.0208145	0.564955
1.22_246.005			246.005	1.22	30	15	15	0.976396	0.430887	-0.0179056	-0.48593
0.73_275.98			275.98	0.73	30	15	15	0.975305	0.338751	-0.0225616	-0.612273
3.46_666.212			666.212	3.46	30	15	15	0.975223	0.639408	-0.0215591	-0.584636
2.48_349.137			349.137	2.48	30	15	15	0.975028	0.339582	-0.0187929	-0.511029
2.98_484.214			484.214	2.98	29	14	15	0.974866	0.565885	-0.0198105	-0.534658
1.64_605.154			605.154	1.64	30	15	15	0.973486	0.286657	-0.018623	-0.505904
5.21_581.331			581.331	5.21	30	15	15	0.972844	0.76825	0.018661	0.506207
3.55_716.266			716.266	3.55	30	15	15	0.971063	0.299561	-0.0212212	-0.575751
1.57_398.089			398.089	1.57	29	15	14	0.971045	0.404589	-0.0214017	-0.586594
Dihydroxybenzoic acid 4	Phenolic	C7H6O4	154.026	3.16	30	15	15	0.970825	0.501527	-0.0224136	-0.608636
4.15_569.151			569.151	4.15	30	15	15	0.969781	0.843609	-0.0221709	-0.601892
2.99_556.178			556.178	2.99	30	15	15	0.969709	0.535466	-0.0223085	-0.604662
5.87_503.3			503.3	5.87	30	15	15	0.969486	0.438265	-0.0213944	-0.580881
3.98_552.202			552.202	3.98	30	15	15	0.969329	0.654216	0.0192649	0.52168
1.08_208.095			208.095	1.08	30	15	15	0.968583	0.415359	-0.0186668	-0.506697
5.41_568.173			568.173	5.41	30	15	15	0.968279	0.413079	-0.0203744	-0.553025
1.67_324.062			324.062	1.67	29	15	14	0.968237	0.386695	-0.0223961	-0.610176
3.51_666.243			666.243	3.51	28	13	15	0.967932	0.130992	-0.016299	-0.516658
1.6_130.063			130.063	1.6	29	15	14	0.966674	0.427376	-0.0211063	-0.599255
3.96_494.233			494.233	3.96	26	13	13	0.966094	0.278996	-0.0205629	-0.617126
3.21_464.178			464.178	3.21	26	13	13	0.965645	0.338377	-0.0186849	-0.506053
4.44_281.991			281.991	4.44	30	15	15	0.96564	0.433586	-0.0196731	-0.534021
3.38_382.183			382.183	3.38	30	15	15	0.965201	0.870357	-0.020317	-0.55183
Coumaroyl quinic acid	Quinic acid derivative	C16H18O8	338.101	3.05	26	15	11	0.964556	0.565575	-0.0222323	-0.578439
1.56_369.105			369.105	1.56	30	15	15	0.964421	0.476111	-0.0219722	-0.596836
3.29_620.18			620.18	3.29	30	15	15	0.963946	0.371105	-0.022141	-0.600975
3.07_404.168			404.168	3.07	30	15	15	0.962819	0.304242	-0.0192502	-0.523437
3.29_560.181			560.181	3.29	30	15	15	0.962646	0.371093	-0.0222544	-0.603356
6.16_543.256			543.256	6.16	30	15	15	0.962499	0.961061	0.0191444	0.519009
Tremuloidin 3 (FA)	Salicinoid	C21H24O10	436.136	3.97	30	15	15	0.962334	0.503933	-0.0219551	-0.595489
6.06_565.338			565.338	6.06	30	15	15	0.962272	1.01771	0.0169841	0.460165
4.3_496.25			496.25	4.3	30	15	15	0.961527	0.362893	-0.0197291	-0.53579
3.6_478.24			478.24	3.6	30	15	15	0.961425	0.331663	-0.0205999	-0.559201
5.12_432.175			432.175	5.12	19	4	15	0.960796	0.609156	0.017362	0.41099
4.62_512.247			512.247	4.62	29	15	14	0.960494	0.440306	-0.0218208	-0.580409
3.28_612.248			612.248	3.28	30	15	15	0.96025	0.550636	-0.0216538	-0.588336
3.47_378.188			378.188	3.47	30	15	15	0.959156	0.543932	-0.0177256	-0.482159
3.93_580.265			580.265	3.93	28	13	15	0.95882	0.463648	0.0210313	0.548685
5.87_563.322			563.322	5.87	30	15	15	0.958794	0.477921	-0.0210694	-0.572053
1.68_406.069			406.069	1.68	30	15	15	0.957739	0.426239	-0.0195893	-0.531564
1.31_380.067			380.067	1.31	30	15	15	0.957479	0.443583	-0.022018	-0.597711
Deoxyhexopyranose 2		C6H12O5	164.067	3.29	30	15	15	0.955447	0.475921	-0.0198216	-0.538146
2.61_326.056			326.056	2.61	30	15	15	0.955166	0.487087	-0.0220934	-0.599334
6.11_527.32			527.32	6.11	30	15	15	0.954352	0.553172	-0.0169918	-0.46173
6.15_996.616			996.616	6.15	30	15	15	0.953999	0.947646	0.0191153	0.518272
1.93_497.155			497.155	1.93	30	15	15	0.953855	0.308893	-0.0170557	-0.46404
4.9_194.094			194.094	4.9	30	15	15	0.953738	0.424183	-0.0198228	-0.538137
Shikimic acid	Phenolic	C7H10O5	174.053	1.61	30	15	15	0.952859	0.348055	-0.0203903	-0.55363
3.52_362.158			362.158	3.52	30	15	15	0.952848	0.261607	-0.0210545	-0.571869
3.44_504.182			504.182	3.44	30	15	15	0.952705	0.278868	-0.0214852	-0.583406
2.12_143.073			143.073	2.12	23	9	14	0.951995	0.409041	0.021707	0.605504
6.15_1064.602			1064.6	6.15	27	12	15	0.951256	0.911174	0.0188071	0.458547
6.12_294.219			294.219	6.12	30	15	15	0.950971	0.602682	0.0195723	0.53031
5.24_326.195			326.195	5.24	26	13	13	0.950777	0.590475	0.0202156	0.565123
2.87_577.088			577.088	2.87	30	15	15	0.949636	0.254083	-0.017848	-0.485036
3.42_406.09			406.09	3.42	30	15	15	0.949291	0.324413	-0.0214652	-0.582584
3.1_436.194			436.194	3.1	30	15	15	0.949089	0.449772	-0.0190817	-0.5183
3.68_478.111			478.111	3.68	30	15	15	0.948572	0.645179	-0.0217037	-0.588393
1.91_355.999			355.999	1.91	30	15	15	0.948147	0.696292	-0.0213788	-0.580284
1.31_220.058			220.058	1.31	30	15	15	0.948049	0.432452	-0.0176755	-0.480434
3.94_554.183			554.183	3.94	28	13	15	0.947899	0.508952	0.0183188	0.480914
3.2_354.189			354.189	3.2	30	15	15	0.947766	0.252915	-0.0179	-0.486607
3.13_328.08			328.08	3.13	22	11	11	0.946894	0.369911	-0.0218726	-0.618731
4.15_430.147			430.147	4.15	25	15	10	0.945514	0.386023	-0.0201076	-0.482181
3.64_432.105			432.105	3.64	30	15	15	0.945232	0.396354	-0.0189779	-0.515485
1.58_430.168			430.168	1.58	30	15	15	0.944529	0.457342	-0.0204701	-0.556184
2.5_490.168			490.168	2.5	30	15	15	0.94427	0.169858	-0.0153054	-0.416557
3.29_612.205			612.205	3.29	30	15	15	0.944207	0.588654	-0.0214046	-0.581384
1.53_418.068			418.068	1.53	30	15	15	0.941427	0.504981	-0.0191545	-0.520526
5.22_493.279			493.279	5.22	30	15	15	0.937829	0.959229	0.0161388	0.437688
5.83_551.319			551.319	5.83	26	11	15	0.937127	0.889975	0.0152208	0.310199
6.24_543.256			543.256	6.24	30	15	15	0.937037	0.960628	0.0173507	0.470619
1.59_162.053		C6H10O5	162.053	1.59	30	15	15	0.937025	0.330601	-0.0154314	-0.41949
2.88_383.122			383.122	2.88	29	14	15	0.936995	0.200262	-0.0189348	-0.535254
3.44_354.111			354.111	3.44	30	15	15	0.93631	0.374352	-0.0194203	-0.526792
Arbutin/hydroquinone glucoside	Phenolic glycoside	C12H16O7	272.089	1.22	30	15	15	0.93598	0.639035	0.0213463	0.578814
3.51_520.193			520.193	3.51	30	15	15	0.935113	0.63776	-0.0214782	-0.583123
1.65_388.079			388.079	1.65	30	15	15	0.934745	0.286303	-0.0132362	-0.359924
2.31_328.08			328.08	2.31	26	12	14	0.93464	0.312246	-0.0197069	-0.544638
6.25_538.349			538.349	6.25	28	13	15	0.933676	0.80077	0.0201161	0.557536
3.63_490.203			490.203	3.63	30	15	15	0.933571	0.68754	-0.0199331	-0.539887
6.06_505.317			505.317	6.06	30	15	15	0.932856	1.03393	0.0159324	0.431575
3.43_488.098			488.098	3.43	30	15	15	0.932175	0.410869	-0.0197842	-0.536364
5.87_631.308			631.308	5.87	30	15	15	0.931954	0.443837	-0.0207996	-0.564688
3.49_454.204			454.204	3.49	30	15	15	0.931234	0.520925	-0.0198267	-0.537934
1.91_334.97			334.97	1.91	30	15	15	0.929235	0.7042	-0.0208921	-0.566688
3.58_354.129			354.129	3.58	26	13	13	0.929189	0.571015	-0.0213066	-0.559385
1.22_261.976			261.976	1.22	30	15	15	0.928726	0.428385	-0.0170988	-0.463878
3.2_408.199			408.199	3.2	30	15	15	0.928394	0.350118	-0.0158659	-0.431777
3.76_536.192			536.192	3.76	25	13	12	0.92822	0.405917	-0.0212801	-0.610264
3.29_585.205			585.205	3.29	30	15	15	0.927122	0.250493	-0.0204315	-0.553604
0.83_326.121			326.121	0.83	30	15	15	0.927093	0.426601	-0.0194234	-0.527503
3.23_668.186			668.186	3.23	30	15	15	0.926078	0.611061	-0.0211209	-0.57247
4.77_331.987			331.987	4.77	30	15	15	0.926005	0.352731	-0.0161514	-0.438604
3.5_604.139			604.139	3.5	30	15	15	0.925588	0.568762	-0.0214103	-0.580984
2.82_466.167			466.167	2.82	30	15	15	0.923945	0.199171	-0.0138048	-0.376128
5.39_180.115			180.115	5.39	30	15	15	0.923438	0.340281	-0.0204543	-0.555081
3.69_490.204			490.204	3.69	30	15	15	0.923105	0.483809	-0.020765	-0.563291
6.08_607.243			607.243	6.08	30	15	15	0.922623	1.0296	0.0190774	0.516996
3.47_478.074			478.074	3.47	30	15	15	0.92217	0.345951	-0.0195209	-0.529821
6.08_613.258			613.258	6.08	30	15	15	0.921163	0.957964	0.0193098	0.523487
3.76_482.09			482.09	3.76	30	15	15	0.920761	0.539667	-0.0191746	-0.520982
3.1_453.183			453.183	3.1	30	15	15	0.920636	0.531782	-0.020999	-0.569675
5.66_830.421			830.421	5.66	30	15	15	0.919308	0.327686	-0.016533	-0.449881
1.22_212.08			212.08	1.22	26	15	11	0.917905	0.576814	-0.0178065	-0.427328
3.53_456.22			456.22	3.53	24	15	9	0.917117	0.407612	-0.0124478	-0.43421
6.16_577.208			577.208	6.16	30	15	15	0.916999	0.890081	0.0194637	0.528095
2.78_301.116			301.116	2.78	30	15	15	0.916213	0.335177	-0.0164518	-0.447552
3.59_398.167			398.167	3.59	30	15	15	0.916085	0.400422	-0.0200278	-0.543503
Coumaric acid glucoside 4	Phenolic glycoside	C15H18O8	326.099	2.95	30	15	15	0.916027	0.637285	-0.0202589	-0.549656
6.25_251.152			251.152	6.25	30	15	15	0.915441	0.632265	-0.0179265	-0.486922
4.11_468.22			468.22	4.11	30	15	15	0.914145	0.342314	-0.0206364	-0.560633
2.12_430.16			430.16	2.12	18	8	10	0.913572	0.432272	0.0209816	0.617076
1.57_396.034			396.034	1.57	30	15	15	0.913552	0.689931	-0.0210868	-0.572492
3.72_348.178			348.178	3.72	30	15	15	0.913363	0.314592	-0.0182693	-0.495871
6.24_521.275			521.275	6.24	30	15	15	0.913124	0.94697	0.0164509	0.446189
1.12_296.11			296.11	1.12	30	15	15	0.911801	0.607365	-0.0210072	-0.570455
1.22_188.049			188.049	1.22	30	15	15	0.911684	0.470698	-0.0165071	-0.448042
3.99_344.219			344.219	3.99	30	15	15	0.908584	0.535508	-0.0200046	-0.542769
1.5_477.183			477.183	1.5	30	15	15	0.907889	0.398551	-0.0163033	-0.443267
1.93_332.111			332.111	1.93	30	15	15	0.906559	0.504097	0.0197541	0.536735
5.77_310.214			310.214	5.77	30	15	15	0.906113	0.625064	0.0178665	0.484854
2.34_456.183			456.183	2.34	21	15	6	0.905539	0.318728	-0.0149317	-0.344681
6.1_650.363			650.363	6.1	29	14	15	0.905393	0.662992	0.0209355	0.56566
5.24_776.244			776.244	5.24	30	15	15	0.905196	0.456533	-0.0180329	-0.489883
0.56_270.095			270.095	0.56	30	15	15	0.904882	0.296563	-0.0207633	-0.563839
4.08_504.219			504.219	4.08	30	15	15	0.904812	0.499505	-0.018975	-0.51511
3.78_556.23			556.23	3.78	30	15	15	0.903619	0.58449	-0.0208502	-0.565516
2.66_300.098			300.098	2.66	30	15	15	0.903591	0.423694	-0.0116561	-0.317439
3.09_728.252			728.252	3.09	30	15	15	0.902165	0.55043	-0.0202011	-0.549199
6.06_679.315			679.315	6.06	30	15	15	0.901938	1.07938	0.0166141	0.450286
3.72_416.203			416.203	3.72	30	15	15	0.900703	0.607213	-0.0180608	-0.491068
1.66_132.042			132.042	1.66	30	15	15	0.900011	0.675207	0.0208194	0.565328
Coumaric acid 1	Phenolic	C9H8O3	164.048	2.83	30	15	15	0.898676	0.54731	-0.0207123	-0.561807
1.65_389.017			389.017	1.65	30	15	15	0.898439	0.38192	-0.0192253	-0.521874
1.31_416.059			416.059	1.31	30	15	15	0.898236	0.658237	-0.0207697	-0.564026
2.65_458.198			458.198	2.65	29	15	14	0.897779	0.638648	0.018112	0.49508
5.07_381.978			381.978	5.07	30	15	15	0.896884	0.505476	-0.0185549	-0.503727
5.65_314.245			314.245	5.65	30	15	15	0.896868	0.737744	0.0159952	0.433936
3.77_2124.1			2124.1	3.77	30	15	15	0.896647	0.268792	-0.0190091	-0.515963
2.73_589.162			589.162	2.73	30	15	15	0.896074	0.49271	-0.0203732	-0.552578
3.01_434.214			434.214	3.01	30	15	15	0.896004	0.20055	-0.0171597	-0.466592
2.78_347.122			347.122	2.78	30	15	15	0.895268	0.33065	-0.0158882	-0.432315
3.24_386.121			386.121	3.24	30	15	15	0.894628	0.294542	-0.0150303	-0.409368
3.61_406.182			406.182	3.61	30	15	15	0.894292	0.36479	-0.0170865	-0.464446
1.58_322.061			322.061	1.58	29	14	15	0.894267	0.763149	0.0140757	0.344776
1.21_429.099			429.099	1.21	30	15	15	0.893789	0.277148	-0.0158668	-0.431165
0.92_283.978			283.978	0.92	30	15	15	0.893021	0.786346	0.0173065	0.469397
2.73_640.16			640.16	2.73	30	15	15	0.892962	0.383226	-0.0196703	-0.533437
4.17_424.231			424.231	4.17	30	15	15	0.89277	0.740406	-0.0196408	-0.533012
3.2_222.087			222.087	3.2	29	14	15	0.892765	0.318432	-0.0169141	-0.482281
3.09_682.245			682.245	3.09	30	15	15	0.891612	0.554916	-0.0199545	-0.542502
3.52_172.073			172.073	3.52	30	15	15	0.891175	0.514474	-0.0178552	-0.485195
6.37_244.203			244.203	6.37	30	15	15	0.890911	0.716202	-0.0167666	-0.455305
6.06_555.308			555.308	6.06	30	15	15	0.889514	1.01607	0.0154593	0.418864
3.93_474.187			474.187	3.93	29	14	15	0.889266	0.544984	0.017041	0.446116
3.48_720.152			720.152	3.48	30	15	15	0.889009	0.469671	-0.0199013	-0.540336
2.98_388.172			388.172	2.98	30	15	15	0.888807	0.621028	-0.0182346	-0.495247
1.41_433.155			433.155	1.41	28	13	15	0.888227	0.517589	-0.0152974	-0.407631
4.1_718.228			718.228	4.1	30	15	15	0.888141	0.639839	-0.0195707	-0.531394
3.2_454.208			454.208	3.2	30	15	15	0.887899	0.36015	-0.0155307	-0.4227
3.21_538.201			538.201	3.21	30	15	15	0.887727	0.624001	-0.0205154	-0.557211
1.22_378.024			378.024	1.22	30	15	15	0.886655	0.418103	-0.0154152	-0.41823
6.06_582.326			582.326	6.06	30	15	15	0.886547	1.00444	0.0148517	0.402306
0.92_260.014			260.014	0.92	25	10	15	0.886389	0.648252	0.0182589	0.480756
2.14_322.036			322.036	2.14	30	15	15	0.886063	0.514429	-0.0191996	-0.520838
3.93_484.216			484.216	3.93	30	15	15	0.885985	0.725969	0.0165239	0.447084
4.8_252.135			252.135	4.8	30	15	15	0.88568	0.551589	-0.0187113	-0.507945
Homogentisic acid/Hydroxymethoxybenzoic acid fr 3	Phenolic	C8H8O4	168.043	2.61	26	11	15	0.884979	0.470578	-0.0197371	-0.540373
6.18_244.203			244.203	6.18	30	15	15	0.884562	0.700451	-0.015629	-0.42455
3.3_489.164			489.164	3.3	19	4	15	0.884476	0.321564	0.0204017	0.558577
5.76_276.172			276.172	5.76	30	15	15	0.88413	0.646994	-0.0166317	-0.451532
1.53_447.019			447.019	1.53	30	15	15	0.883797	0.328154	-0.0155078	-0.420839
6.13_439.269			439.269	6.13	30	15	15	0.882859	0.577144	0.0196012	0.531667
4.68_380.204			380.204	4.68	23	15	8	0.882396	0.291216	-0.0173093	-0.514009
3.3_466.112			466.112	3.3	30	15	15	0.882372	0.521395	-0.0203673	-0.552432
2.12_218.069			218.069	2.12	18	6	12	0.879808	0.420807	0.0203468	0.604226
3.07_382.183			382.183	3.07	30	15	15	0.879064	0.697329	-0.0182032	-0.494317
5.78_684.363			684.363	5.78	30	15	15	0.878815	0.444237	-0.0152414	-0.414661
1.08_378.158			378.158	1.08	17	7	10	0.878397	0.442873	0.0166208	0.557025
Salicin 1	Salicinoid	C13H18O7	286.105	2.14	30	15	15	0.878181	0.362932	-0.0185031	-0.501866
3.07_173.105			173.105	3.07	30	15	15	0.877657	0.320439	-0.0134008	-0.364473
1.22_524.104			524.104	1.22	26	14	12	0.876637	0.349825	-0.0153529	-0.348807
3.23_615.213			615.213	3.23	30	15	15	0.875948	0.463567	-0.0197878	-0.53599
3.76_1063.059			1063.06	3.76	30	15	15	0.875121	0.375845	-0.0179377	-0.487078
Prodelphinidin dimer 5	PA	C30H26O13	594.134	2.04	19	9	10	0.874893	0.536657	-0.0201991	-0.518985
4.6_676.214			676.214	4.6	30	15	15	0.874794	0.804138	-0.0188631	-0.511822
6.03_278.223			278.223	6.03	30	15	15	0.874656	0.472844	-0.0117629	-0.320005
3.76_480.09			480.09	3.76	30	15	15	0.874083	0.374735	-0.0174166	-0.47309
4.05_566.203			566.203	4.05	30	15	15	0.873922	0.227727	-0.0179284	-0.487439
3.75_556.179			556.179	3.75	28	15	13	0.873772	0.490065	-0.0191865	-0.548688
Deoxystrigol-like 1	Strigolactone	C19H22O5	330.146	3.36	30	15	15	0.87288	0.511055	-0.01957	-0.531802
3.68_444.197			444.197	3.68	30	15	15	0.872831	0.595302	-0.0194555	-0.527791
1.22_204.021			204.021	1.22	30	15	15	0.872827	0.428457	-0.0166708	-0.452218
0.77_490.153			490.153	0.77	30	15	15	0.872216	0.62069	-0.0195598	-0.530708
4.28_188.141			188.141	4.28	30	15	15	0.871742	0.421387	0.0150694	0.408954
1.64_162.053		C6H10O5	162.053	1.64	30	15	15	0.871605	0.479207	-0.0182367	-0.495495
1.21_493.179			493.179	1.21	30	15	15	0.870098	0.317339	-0.0163572	-0.443972
2.06_444.123			444.123	2.06	30	15	15	0.869717	0.515346	-0.0194893	-0.528704
1.83_478.037			478.037	1.83	30	15	15	0.869501	0.536363	-0.0187312	-0.508161
4.27_530.237			530.237	4.27	18	12	6	0.869306	0.306755	-0.0168444	-0.6567
3.29_118.042			118.042	3.29	30	15	15	0.867805	0.44914	-0.0193969	-0.5262
3.29_636.201			636.201	3.29	30	15	15	0.867594	0.372688	-0.0194162	-0.526027
Procyanidin trimer 4	PA	C45H38O18	866.204	2.65	30	15	15	0.865443	0.480532	-0.0189928	-0.515102
Pyrogallol	Phenolic	C6H6O3	126.031	1.32	30	15	15	0.8639	0.462811	-0.0190651	-0.518129
3.65_554.145			554.145	3.65	30	15	15	0.86366	0.662437	-0.0193396	-0.524823
1.54_386.141			386.141	1.54	30	15	15	0.863341	0.399985	-0.0145438	-0.395161
3.44_602.16			602.16	3.44	30	15	15	0.863229	0.442623	-0.0187059	-0.507551
1.64_581.195			581.195	1.64	30	15	15	0.862894	0.398145	-0.0133847	-0.364164
3.98_501.204			501.204	3.98	29	14	15	0.862747	0.537415	0.0175847	0.463957
2.96_296.09			296.09	2.96	30	15	15	0.862712	0.752598	-0.0171288	-0.465376
0.65_252.048			252.048	0.65	30	15	15	0.862032	0.255491	-0.0192144	-0.521574
6.36_294.219			294.219	6.36	29	15	14	0.86063	0.404439	-0.0123034	-0.326976
3.3_473.169			473.169	3.3	22	7	15	0.859177	0.378553	0.0192226	0.538108
0.92_173.963			173.963	0.92	30	15	15	0.859128	0.760017	0.0181668	0.493056
3.22_558.185			558.185	3.22	30	15	15	0.85906	0.409672	-0.0150092	-0.407231
3.98_422.214			422.214	3.98	29	14	15	0.858759	0.595011	0.0191568	0.514614
6.16_280.241			280.241	6.16	30	15	15	0.858592	0.974087	0.0165949	0.449819
5.47_602.327			602.327	5.47	30	15	15	0.856699	0.498604	-0.0178404	-0.484599
4.09_538.223			538.223	4.09	30	15	15	0.856188	0.656943	-0.017646	-0.47952
2.2_155.022			155.022	2.2	30	15	15	0.854237	0.524518	-0.0157105	-0.426811
1.22_102.032		C4H6O3	102.032	1.22	30	15	15	0.85395	0.369976	-0.013957	-0.378669
4-hydroxyacetophenone fr 1		C8H8O2	136.052	2.67	29	14	15	0.853528	0.323235	-0.0190387	-0.516076
5.55_267.109			267.109	5.55	30	15	15	0.853351	0.700049	-0.0161302	-0.438083
2.89_440.186			440.186	2.89	30	15	15	0.853278	0.409216	-0.0153952	-0.418514
1.22_160.004			160.004	1.22	29	15	14	0.85265	0.455466	-0.0158335	-0.417106
6.21_596.296			596.296	6.21	30	15	15	0.851915	0.248764	-0.00629794	-0.171887
5.44_264.172			264.172	5.44	30	15	15	0.851012	0.51607	-0.0179428	-0.487027
3.94_438.21			438.21	3.94	30	15	15	0.850862	0.789623	0.0152725	0.413162
2.8_547.15			547.15	2.8	30	15	15	0.849466	0.197941	-0.0137012	-0.37278
3.98_468.22			468.22	3.98	30	15	15	0.848421	0.532081	0.0186327	0.504676
1.21_417.011			417.011	1.21	27	12	15	0.848167	0.439987	0.0174912	0.487007
1.4_406.121			406.121	1.4	28	13	15	0.84816	0.38487	-0.0138599	-0.368876
1.81_289.075			289.075	1.81	30	15	15	0.847791	0.236681	-0.00173327	-0.048122
0.86_178.048			178.048	0.86	30	15	15	0.846594	0.861041	-0.0174438	-0.473356
3.09_364.115			364.115	3.09	30	15	15	0.842972	0.463143	-0.0173927	-0.472629
0.92_206			206	0.92	30	15	15	0.84229	0.89973	0.0159607	0.433053
1.22_162.053		C6H10O5	162.053	1.22	30	15	15	0.842206	0.364063	-0.0135878	-0.368693
1.92_366.062			366.062	1.92	30	15	15	0.8409	0.44848	-0.0193992	-0.526795
4.47_570.287			570.287	4.47	30	15	15	0.840788	0.405043	-0.0134118	-0.365131
2.45_349.988			349.988	2.45	30	15	15	0.839477	0.637854	-0.0156251	-0.424405
1.22_118.063			118.063	1.22	30	15	15	0.838973	0.327638	-0.0133745	-0.362891
3.75_350.023			350.023	3.75	30	15	15	0.838779	0.403997	-0.0182178	-0.494532
1.85_117.079			117.079	1.85	30	15	15	0.838588	0.532522	-0.0168542	-0.457585
1.5_190.048			190.048	1.5	30	15	15	0.838163	0.38792	-0.017587	-0.477338
6.06_633.324			633.324	6.06	30	15	15	0.837695	1.03588	0.0149523	0.404971
5.07_445.979			445.979	5.07	30	15	15	0.83744	0.620935	-0.0166817	-0.452806
3.16_436.193			436.193	3.16	30	15	15	0.836626	0.571591	-0.0183322	-0.49769
3.94_476.186			476.186	3.94	29	14	15	0.836084	0.548886	0.0190637	0.515749
5.89_286.214			286.214	5.89	30	15	15	0.835165	0.471451	-0.0163466	-0.443971
2.87_306.078			306.078	2.87	29	14	15	0.835124	0.723598	-0.0181742	-0.49119
Sinapoyl alcohol	Sinapate derivative	C11H14O4	210.091	4.59	30	15	15	0.833889	0.682312	-0.0158698	-0.43135
6.13_434.242			434.242	6.13	24	9	15	0.832666	0.709834	0.0136352	0.292661
2.03_310.127			310.127	2.03	30	15	15	0.832368	0.608408	-0.0191804	-0.52114
Arbutin/hydroquinone glucoside 1 (FA)	Phenolic glycoside	C13H18O9	318.095	1.22	30	15	15	0.832195	0.638471	0.0189333	0.513363
Coumaric acid glucoside 3	Phenolic glycoside	C15H18O8	326.1	2.91	30	15	15	0.831927	0.530272	-0.0184935	-0.501637
1.22_164.058			164.058	1.22	30	15	15	0.830459	0.3876	-0.0131605	-0.357082
3.29_638.179			638.179	3.29	30	15	15	0.830323	0.292763	-0.0190832	-0.517215
2.67_149.084			149.084	2.67	30	15	15	0.82988	0.482124	-0.0152442	-0.415065
3.79_336.177			336.177	3.79	30	15	15	0.829851	0.458304	-0.0170725	-0.463399
3.76_340.032			340.032	3.76	30	15	15	0.829816	0.440131	-0.0166591	-0.452355
2.59_412.133			412.133	2.59	30	15	15	0.828856	0.194486	-0.00255753	-0.0697205
5.12_380.216			380.216	5.12	15	0	15	0.828855	0.389284	0.0041084	0.146242
0.92_233.995			233.995	0.92	30	15	15	0.827244	0.781038	0.0160887	0.436635
0.51_231.919			231.919	0.51	29	15	14	0.826849	0.418333	-0.0185054	-0.502009
1.91_306.017			306.017	1.91	30	15	15	0.826484	0.688064	-0.0181221	-0.491888
0.56_99.032			99.032	0.56	22	8	14	0.825229	0.696375	0.0152271	0.381834
2.43_546.215			546.215	2.43	30	15	15	0.824893	0.451358	-0.0128053	-0.348013
5.92_248.177			248.177	5.92	29	14	15	0.824869	0.269008	-0.01438	-0.372848
6.15_1084.669			1084.67	6.15	30	15	15	0.824773	0.912458	0.0145818	0.395196
1.11_303.096			303.096	1.11	29	14	15	0.823804	0.346168	-0.017264	-0.48551
3.12_652.196			652.196	3.12	29	14	15	0.823641	0.536302	-0.014644	-0.358084
1.32_224.036			224.036	1.32	30	15	15	0.821668	0.68788	-0.0155214	-0.422362
1.57_338.078			338.078	1.57	30	15	15	0.82141	0.673744	-0.0183725	-0.498945
Caffeoyl salicin	Salicinoid	C22H24O10	448.139	3.76	30	15	15	0.82074	0.463404	-0.0167125	-0.453803
1.22_1083.054			1083.05	1.22	30	15	15	0.819845	0.359668	-0.0119998	-0.32561
2.75_216.147			216.147	2.75	30	15	15	0.819687	0.702676	0.0128419	0.348455
3.08_476.152			476.152	3.08	30	15	15	0.819153	0.722671	-0.0177417	-0.481666
3.01_508.177			508.177	3.01	30	15	15	0.818628	0.374782	-0.0136318	-0.370774
5.64_272.198			272.198	5.64	30	15	15	0.81804	0.732273	-0.0175816	-0.477272
3.76_352.088			352.088	3.76	30	15	15	0.816578	0.50509	-0.017487	-0.474739
6.06_649.298			649.298	6.06	30	15	15	0.816562	1.04761	0.0142425	0.385909
1.93_314.064			314.064	1.93	30	15	15	0.81458	0.742356	-0.0178435	-0.484499
0.55_324.036			324.036	0.55	30	15	15	0.814451	0.674854	0.0175255	0.475644
3.52_128.084			128.084	3.52	30	15	15	0.812573	0.562832	-0.0163435	-0.444122
5.59_209.105			209.105	5.59	30	15	15	0.811876	0.472749	-0.0119946	-0.326304
5.12_312.23			312.23	5.12	15	0	15	0.811771	0.386544	0.00391547	0.140016
4.48_372.048			372.048	4.48	30	15	15	0.810184	0.585693	-0.0173801	-0.471997
2.18_413.058			413.058	2.18	18	3	15	0.808544	0.603936	0.0126383	0.273989
1.22_100.052			100.052	1.22	30	15	15	0.807561	0.377617	-0.0130217	-0.35326
4.06_284.057			284.057	4.06	15	0	15	0.806653	0.315146	0.00430793	0.151798
5.8_240.075			240.075	5.8	30	15	15	0.806642	0.462284	-0.015644	-0.424906
3.42_354.189			354.189	3.42	30	15	15	0.805689	0.536207	-0.0127949	-0.348193
3.07_169.045			169.045	3.07	30	15	15	0.80451	0.314927	-0.0139955	-0.380337
1.21_206.043			206.043	1.21	25	10	15	0.803207	0.712582	0.0158891	0.400345
1.91_278.022			278.022	1.91	29	15	14	0.802727	0.745054	-0.0172499	-0.460643
2.12_402.073			402.073	2.12	30	15	15	0.802723	0.341203	-0.0185606	-0.50308
1.3_416.153			416.153	1.3	30	15	15	0.802411	0.364467	-0.0179467	-0.488028
6.05_785.489			785.489	6.05	23	10	13	0.802214	0.542649	-0.0150764	-0.426004
6.38_344.219			344.219	6.38	25	13	12	0.80098	0.453586	-0.0170189	-0.500974
3.2_628.235			628.235	3.2	30	15	15	0.799803	0.571245	-0.0179545	-0.486969
5.45_195.09			195.09	5.45	30	15	15	0.79846	0.366949	-0.016991	-0.461289
3.99_490.204			490.204	3.99	30	15	15	0.798341	0.726983	-0.0166418	-0.452021
0.67_148.037			148.037	0.67	30	15	15	0.798321	0.529612	-0.0181068	-0.491364
5.16_493.28			493.28	5.16	30	15	15	0.797651	0.735765	0.0146693	0.398003
trans-Zeatin	Cytokinin	C10H13N5O	219.111	1.8	30	15	15	0.79723	0.296194	-0.00218381	-0.0603096
2.05_362.085			362.085	2.05	30	15	15	0.797217	0.697797	0.0175078	0.473921
3.07_125.055			125.055	3.07	30	15	15	0.797116	0.231535	-0.0154557	-0.41998
0.56_224.089			224.089	0.56	30	15	15	0.796759	0.401375	-0.0182214	-0.494944
5.17_208.146			208.146	5.17	30	15	15	0.796702	0.541043	-0.0162135	-0.440322
5.12_382.194			382.194	5.12	15	0	15	0.796274	0.409702	0.0044755	0.155069
0.92_201.979			201.979	0.92	30	15	15	0.795427	0.754435	0.0170435	0.4627
3.42_308.09			308.09	3.42	30	15	15	0.795312	0.424803	-0.0123375	-0.335547
1.37_313.101			313.101	1.37	30	15	15	0.795179	0.700573	0.0124394	0.337499
2.94_251.079			251.079	2.94	30	15	15	0.794507	0.840554	0.0102583	0.276861
3.97_532.214			532.214	3.97	30	15	15	0.79408	0.448368	-0.0156361	-0.425257
0.65_134.058			134.058	0.65	30	15	15	0.792983	0.758447	-0.018342	-0.497906
1.74_350.085			350.085	1.74	28	13	15	0.792851	0.337863	-0.0173161	-0.504149
1.86_513.184			513.184	1.86	26	13	13	0.792651	0.394148	0.0177727	0.514908
6.32_280.17			280.17	6.32	30	15	15	0.792537	0.688015	-0.0162027	-0.439967
2.87_498.144			498.144	2.87	30	15	15	0.792324	0.351682	-0.012105	-0.329555
6.16_561.246			561.246	6.16	30	15	15	0.791782	1.01537	0.0173954	0.471735
1.81_243.069			243.069	1.81	30	15	15	0.791095	0.235577	0.000757508	0.0193829
2.25_352.136			352.136	2.25	30	15	15	0.790846	0.438331	-0.0113358	-0.308529
4.77_395.983			395.983	4.77	30	15	15	0.790765	0.532693	-0.0139378	-0.37833
3.29_360.156			360.156	3.29	30	15	15	0.790614	0.444999	-0.0179761	-0.487956
3.09_504.181			504.181	3.09	30	15	15	0.790273	0.400642	-0.0151721	-0.412209
6.35_314.246			314.246	6.35	24	15	9	0.789471	0.728418	-0.0151722	-0.453294
5.48_380.216			380.216	5.48	29	14	15	0.787446	0.489123	0.0133325	0.363383
1.22_346.088			346.088	1.22	29	15	14	0.786917	0.403036	-0.012804	-0.332874
3.97_424.171			424.171	3.97	25	13	12	0.785778	0.615755	-0.0179819	-0.477253
2.12_492.132			492.132	2.12	16	4	12	0.785372	0.48338	0.017982	0.534926
3.09_434.213			434.213	3.09	30	15	15	0.784183	0.616696	-0.017118	-0.464823
5.29_238.123			238.123	5.29	30	15	15	0.784008	0.777274	-0.01634	-0.443673
4.42_438.133			438.133	4.42	30	15	15	0.783841	0.310718	-0.0125366	-0.34051
1.68_347.12			347.12	1.68	30	15	15	0.783715	0.566033	-0.017301	-0.470283
3.62_540.167			540.167	3.62	30	15	15	0.783101	0.728016	-0.0147909	-0.402097
2.01_204.064			204.064	2.01	30	15	15	0.78282	0.649378	-0.01639	-0.445682
6.13_559.231			559.231	6.13	19	5	14	0.782717	0.516606	0.00682221	0.163987
2.38_475.15			475.15	2.38	30	15	15	0.782571	0.547139	-0.0126516	-0.343879
0.5_322.088			322.088	0.5	30	15	15	0.782313	0.67108	-0.0173427	-0.471767
1.22_362.056			362.056	1.22	30	15	15	0.781981	0.363885	-0.0127768	-0.346581
1.89_322.126			322.126	1.89	29	15	14	0.781662	0.490766	-0.0171282	-0.484989
3.3_242.115			242.115	3.3	30	15	15	0.780586	0.324466	-0.0120027	-0.326191
6.37_184.182			184.182	6.37	29	14	15	0.78051	0.729575	0.00986426	0.269243
Epigallocatechin 2	PA	C15H14O7	306.075	2.61	30	15	15	0.779428	0.559293	-0.0167389	-0.454222
5.92_316.26			316.26	5.92	30	15	15	0.779319	0.509303	-0.0101285	-0.275284
3.23_590.195			590.195	3.23	30	15	15	0.778073	0.602332	-0.0169953	-0.461012
4.39_210.1			210.1	4.39	30	15	15	0.777528	0.503126	-0.0164265	-0.446328
3.37_218.115			218.115	3.37	15	0	15	0.773692	0.402182	0.00479182	0.16417
4.06_316.074			316.074	4.06	15	0	15	0.773608	0.342472	0.00502267	0.170961
3.76_100.072			100.072	3.76	30	15	15	0.772151	0.38115	-0.0152546	-0.414294
3.76_488.083			488.083	3.76	30	15	15	0.771568	0.379834	-0.01573	-0.427254
3.94_552.202			552.202	3.94	30	15	15	0.770445	0.791014	0.0127852	0.345596
1.8_273.029			273.029	1.8	25	10	15	0.769292	0.17145	0.000382	-0.0771898
6.43_381.165			381.165	6.43	17	7	10	0.768253	0.621081	-0.0175428	-0.49381
3.23_666.211			666.211	3.23	30	15	15	0.768167	0.551963	-0.0173891	-0.470968
4.06_366.056			366.056	4.06	15	0	15	0.767615	0.333586	0.0046873	0.161197
1.63_468.144			468.144	1.63	30	15	15	0.76671	0.61379	0.0176713	0.479841
5.27_581.33			581.33	5.27	30	15	15	0.766524	0.734894	0.014662	0.398001
5.48_428.201			428.201	5.48	30	15	15	0.766402	0.700255	0.0151207	0.410149
4.06_156.115			156.115	4.06	15	0	15	0.765836	0.325109	0.00460568	0.158864
2.75_444.125			444.125	2.75	30	15	15	0.764407	0.439273	-0.0169975	-0.461411
Coumarin 2	Phenolic	C9H6O2	146.037	3.36	30	15	15	0.763263	0.580875	-0.014963	-0.406412
5.21_287.246			287.246	5.21	30	15	15	0.763133	0.564888	-0.0135404	-0.367753
0.56_369.012			369.012	0.56	30	15	15	0.762522	0.327391	-0.0174949	-0.475062
2.12_236.079			236.079	2.12	22	8	14	0.762368	0.682431	0.0166265	0.444553
4.52_216.136			216.136	4.52	30	15	15	0.761146	0.838744	-0.0160529	-0.435775
5.99_555.496			555.496	5.99	28	13	15	0.760801	0.588835	0.0158259	0.430374
3.75_197.961			197.961	3.75	30	15	15	0.760663	0.416721	-0.0168675	-0.457783
4.83_230.152			230.152	4.83	30	15	15	0.759293	0.879419	-0.0157763	-0.428324
1.11_280.046			280.046	1.11	19	7	12	0.758749	0.318529	-0.0123402	-0.315649
5.36_431.98			431.98	5.36	30	15	15	0.758056	0.577927	-0.0168398	-0.456916
6.17_400.328			400.328	6.17	30	15	15	0.757665	0.365287	-0.0154928	-0.420411
3.7_404.113			404.113	3.7	30	15	15	0.757493	0.432789	-0.0136673	-0.371537
1.08_261.053			261.053	1.08	30	15	15	0.75741	0.725304	0.0155395	0.422305
3.23_588.196			588.196	3.23	30	15	15	0.75727	0.54275	-0.0174993	-0.474232
3.99_504.214			504.214	3.99	30	15	15	0.757258	0.514785	-0.0148625	-0.404091
2.72_472.179			472.179	2.72	30	15	15	0.755067	0.400948	-0.0127935	-0.348492
3.2_370.126			370.126	3.2	30	15	15	0.752469	0.370898	-0.0160183	-0.434517
5.48_428.198			428.198	5.48	30	15	15	0.75192	0.692469	0.015584	0.422897
1.2_394.118			394.118	1.2	30	15	15	0.751479	0.451236	-0.0163726	-0.44354
3.15_296.09			296.09	3.15	30	15	15	0.750651	0.656095	-0.0153453	-0.417393
3.23_476.137			476.137	3.23	30	15	15	0.749265	0.808645	-0.014509	-0.394575
3.76_98.067			98.067	3.76	30	15	15	0.748865	0.382573	-0.0150138	-0.407682
2.01_316.079		C13H16O9	316.079	2.01	30	15	15	0.748403	0.644477	-0.0172022	-0.466979
2.75_464.149			464.149	2.75	30	15	15	0.747883	0.522635	-0.015931	-0.432771
1.27_345.047			345.047	1.27	30	15	15	0.747879	0.413791	-0.0153173	-0.415656
3.06_323.1			323.1	3.06	30	15	15	0.747326	0.47975	0.0164863	0.446554
2.8_426.173			426.173	2.8	30	15	15	0.747	0.838	-0.0159913	-0.4345
3.07_472.156			472.156	3.07	30	15	15	0.746718	0.344256	-0.0132597	-0.361038
1.4_484.139			484.139	1.4	30	15	15	0.746695	0.422724	-0.0105799	-0.288033
6.15_352.224			352.224	6.15	15	0	15	0.746478	0.394923	0.00120132	0.0620776
5.61_314.244			314.244	5.61	30	15	15	0.745942	0.949751	0.0118643	0.321576
5.9_539.322			539.322	5.9	26	14	12	0.745711	0.364387	-0.0129012	-0.286376
3.58_452.224			452.224	3.58	30	15	15	0.745198	0.367781	-0.0111439	-0.303498
3.63_562.259			562.259	3.63	30	15	15	0.745111	0.346094	-0.0111073	-0.302551
6.06_557.304			557.304	6.06	30	15	15	0.744887	0.817662	0.0122461	0.331636
1.59_548.142			548.142	1.59	20	10	10	0.744448	0.535095	-0.0153794	-0.397627
3.94_501.21			501.21	3.94	29	14	15	0.743442	0.791421	0.0134121	0.347635
2.14_206.079			206.079	2.14	20	8	12	0.743428	0.353559	-0.0151696	-0.495514
1.09_277.025			277.025	1.09	30	15	15	0.742633	0.661378	0.0128957	0.350375
6.21_664.281			664.281	6.21	30	15	15	0.742496	0.253948	-0.00819501	-0.223004
3.57_406.184			406.184	3.57	30	15	15	0.74137	0.516481	-0.0116196	-0.31636
5.14_330.24			330.24	5.14	30	15	15	0.740218	0.525065	0.0098796	0.26756
5.41_225.1			225.1	5.41	30	15	15	0.740108	0.534243	-0.0153633	-0.416927
5.13_237.149			237.149	5.13	30	15	15	0.739981	0.51063	-0.0151557	-0.411497
1.68_404.091			404.091	1.68	30	15	15	0.739589	0.849188	-0.0146575	-0.397591
3.21_582.228			582.228	3.21	30	15	15	0.739581	0.578319	-0.0163887	-0.444662
3.76_144.062			144.062	3.76	30	15	15	0.73905	0.450684	-0.0148635	-0.403592
Homogentisic acid/Hydroxymethoxybenzoic acid fr 1	Phenolic	C8H8O4	168.042	1.51	24	15	9	0.739006	0.484228	-0.016674	-0.478837
5.02_316.188			316.188	5.02	30	15	15	0.738483	0.5742	-0.01627	-0.441787
0.58_432.145			432.145	0.58	21	9	12	0.738469	0.774574	-0.0161988	-0.381185
1.44_252.121			252.121	1.44	29	14	15	0.738422	0.476682	-0.0137549	-0.370224
Glutathione (GSH)	Primary	C10H17N3O6S	307.083	0.68	24	15	9	0.738191	0.388349	-0.0155266	-0.361439
3.15_480.219			480.219	3.15	30	15	15	0.737564	0.646462	-0.0170325	-0.461996
0.5_304.079			304.079	0.5	30	15	15	0.736826	0.427574	-0.0168131	-0.456684
6.29_166.047			166.047	6.29	30	15	15	0.73566	0.502225	-0.0128437	-0.348586
5.26_220.11			220.11	5.26	15	0	15	0.735433	0.242128	0.000461027	0.0389999
5.38_258.183			258.183	5.38	30	15	15	0.73476	0.939074	-0.0148312	-0.402744
1_206.042			206.042	1	19	8	11	0.734466	0.453456	0.0167479	0.462136
4.02_488.204			488.204	4.02	25	12	13	0.733877	0.471431	0.0169392	0.488527
5.85_508.337			508.337	5.85	15	0	15	0.733325	0.266769	-0.000303026	0.0161191
0.75_134.058			134.058	0.75	30	15	15	0.733111	0.577943	0.0167846	0.455591
5.96_1187.156			1187.16	5.96	30	15	15	0.732795	0.934085	-0.0154819	-0.420376
1.49_320.955			320.955	1.49	30	15	15	0.732323	0.788534	-0.0159163	-0.432243
1.54_406.102			406.102	1.54	30	15	15	0.731932	0.410692	-0.0145681	-0.395993
1.59_338.12			338.12	1.59	30	15	15	0.731031	0.524205	-0.015441	-0.418975
1.74_304.079			304.079	1.74	30	15	15	0.729306	0.395993	-0.0151292	-0.411522
5.17_270.139			270.139	5.17	30	15	15	0.727819	0.34754	-0.0162982	-0.441938
4.63_243.184			243.184	4.63	30	15	15	0.727429	0.871262	-0.0150152	-0.407714
1.43_266.1			266.1	1.43	30	15	15	0.726887	0.59866	0.00901233	0.244132
3.33_262.098			262.098	3.33	30	15	15	0.726099	0.882335	0.0163369	0.442521
2.84_424.185			424.185	2.84	29	15	14	0.726074	0.451604	-0.0137171	-0.367871
3.76_291.11			291.11	3.76	30	15	15	0.726051	0.424057	-0.0153137	-0.415646
6.14_565.338			565.338	6.14	30	15	15	0.72502	0.996507	0.0113947	0.308714
3.98_422.215			422.215	3.98	30	15	15	0.724609	0.488899	0.0162253	0.439802
4.01_215.152			215.152	4.01	30	15	15	0.724432	0.813856	-0.0159516	-0.433231
0.56_370.111			370.111	0.56	30	15	15	0.724198	0.490786	-0.0152666	-0.413883
1.67_326.076			326.076	1.67	30	15	15	0.723096	0.616878	-0.0154384	-0.418785
3.44_486.23			486.23	3.44	30	15	15	0.722263	0.597642	0.00510671	0.137996
6.16_613.259			613.259	6.16	30	15	15	0.721365	1.0406	0.0129215	0.349961
6.01_272.235			272.235	6.01	30	15	15	0.721035	0.521047	-0.0101765	-0.276259
5.28_474.225			474.225	5.28	24	10	14	0.720783	0.561274	-0.0134604	-0.295137
3.76_338.032			338.032	3.76	30	15	15	0.720113	0.445383	-0.0146705	-0.398386
5.88_278.151			278.151	5.88	30	15	15	0.71908	0.646497	-0.0131686	-0.357401
5.71_416.328			416.328	5.71	30	15	15	0.718702	0.743764	-0.0147023	-0.399363
dinor-12-oxo-phytodienoic acid	Jasmonate	C18H28O3	292.204	5.67	27	13	14	0.717518	0.774371	-0.0164873	-0.452187
Procyanidin dimer 2	PA	C30H26O12	578.141	2.81	30	15	15	0.71746	0.662989	-0.0165327	-0.448846
0.82_116.01			116.01	0.82	30	15	15	0.716986	0.401623	-0.0162133	-0.439323
3.93_516.222			516.222	3.93	21	12	9	0.716713	0.4047	-0.016432	-0.506142
5.04_354.11			354.11	5.04	30	15	15	0.716229	0.577927	-0.0127466	-0.346119
1.46_132.043			132.043	1.46	30	15	15	0.715985	0.570065	-0.0115348	-0.31378
2.11_508.103			508.103	2.11	27	13	14	0.715337	0.589231	0.0136369	0.363937
Catechol/Hydroquinone 2	Phenolic	C6H6O2	110.036	2.07	28	15	13	0.714517	0.666269	-0.0165217	-0.438857
2.65_470.196			470.196	2.65	22	15	7	0.713477	0.376447	-0.00591088	-0.263905
4.06_482.236			482.236	4.06	30	15	15	0.713381	0.586567	-0.0137398	-0.37327
6.14_505.316			505.316	6.14	30	15	15	0.712173	0.98884	0.0111054	0.300864
1.48_292.001			292.001	1.48	30	15	15	0.710042	0.724519	-0.0143845	-0.390753
1.58_368.078			368.078	1.58	30	15	15	0.709977	0.758322	-0.0117181	-0.31909
3.51_308.09			308.09	3.51	30	15	15	0.708471	0.356699	-0.0107671	-0.293042
3.76_282.985			282.985	3.76	30	15	15	0.706251	0.323202	-0.0144114	-0.39128
1.64_697.163			697.163	1.64	30	15	15	0.70617	0.411978	-0.010589	-0.2877
3.44_604.137			604.137	3.44	30	15	15	0.705586	0.572233	-0.0153576	-0.416888
5.96_396.114			396.114	5.96	30	15	15	0.70505	1.03684	-0.0155265	-0.421499
5.36_396.25			396.25	5.36	30	15	15	0.704421	0.84376	-0.0140708	-0.382238
5.43_294.184			294.184	5.43	30	15	15	0.704228	0.473779	-0.0127677	-0.347249
4.32_274.177			274.177	4.32	30	15	15	0.703949	0.541649	-0.0122958	-0.333675
2.41_402.075			402.075	2.41	30	15	15	0.703903	0.469254	-0.0149692	-0.406944
3.56_374.147			374.147	3.56	29	15	14	0.70335	0.619943	-0.0146564	-0.402507
1.31_172.085			172.085	1.31	30	15	15	0.702921	0.350797	-0.0152343	-0.414458
Coumarin 1	Phenolic	C9H6O2	146.037	3.29	30	15	15	0.701488	0.396533	-0.0127058	-0.344937
2.22_328.114			328.114	2.22	30	15	15	0.701279	0.665395	-0.0161282	-0.437489
6.01_330.196			330.196	6.01	25	14	11	0.700605	0.484414	-0.0159445	-0.410826
1.08_131.094			131.094	1.08	30	15	15	0.700495	0.49049	0.0089264	0.242482
4-hydroxyacetophenone fr 2		C8H8O2	136.052	3.17	30	15	15	0.699872	0.833015	0.0154962	0.420168
2.12_366.064			366.064	2.12	21	7	14	0.699863	0.292319	0.0161307	0.462136
4.33_328.225			328.225	4.33	15	0	15	0.698942	0.432308	0.00573375	0.188286
5.79_310.212			310.212	5.79	30	15	15	0.697487	0.618007	0.0147825	0.40069
1.52_659.225			659.225	1.52	30	15	15	0.696922	0.678217	-0.0143825	-0.390933
3.73_310.162			310.162	3.73	15	15	0	0.69658	0.156638	-0.00127285	-0.0625228
6.38_296.235			296.235	6.38	27	15	12	0.694955	0.740497	0.0144304	0.406122
1.22_232.017			232.017	1.22	30	15	15	0.692888	0.568357	-0.0145443	-0.394716
3.29_610.186			610.186	3.29	30	15	15	0.69276	0.244993	-0.0156691	-0.424515
5.21_222.139			222.139	5.21	30	15	15	0.690287	0.479115	-0.015038	-0.408147
3.94_482.236			482.236	3.94	30	15	15	0.688899	0.360357	-0.0145146	-0.393805
5.96_700.233			700.233	5.96	30	15	15	0.688635	1.00098	-0.0150468	-0.408375
1.12_290.074			290.074	1.12	25	11	14	0.687887	0.484664	-0.00863902	-0.223982
2.91_328.08			328.08	2.91	29	14	15	0.687427	0.357157	-0.0146172	-0.410324
5.48_312.23			312.23	5.48	30	15	15	0.687354	0.291878	0.0110932	0.300809
3.79_308.009			308.009	3.79	30	15	15	0.687189	0.367939	-0.0150589	-0.408805
3.76_308.072			308.072	3.76	30	15	15	0.686697	0.460206	-0.0139156	-0.377826
3.2_524.17			524.17	3.2	29	14	15	0.684865	0.587806	0.00212648	0.0313993
6.04_222.162			222.162	6.04	30	15	15	0.684551	0.402162	-0.0109855	-0.298307
6.02_805.506			805.506	6.02	15	0	15	0.683949	0.336795	0.0022211	0.0873858
3.18_169.045			169.045	3.18	30	15	15	0.683751	0.436881	-0.0102464	-0.278627
3.76_342.027			342.027	3.76	30	15	15	0.683715	0.394962	-0.0148109	-0.402178
2.1_506.123			506.123	2.1	30	15	15	0.683081	0.499319	-0.00539728	-0.147178
4.33_229.168			229.168	4.33	30	15	15	0.682113	0.869338	-0.0140525	-0.381522
5.71_348.206			348.206	5.71	29	14	15	0.681392	0.257236	-0.00214667	-0.0558188
6_893.557			893.557	6	15	0	15	0.681196	0.36329	0.000881005	0.0499883
Phenol fr 2	Phenolic	C6H6O	94.042	2.45	30	15	15	0.680564	0.717145	-0.0125264	-0.340214
3.1_550.225			550.225	3.1	30	15	15	0.680093	0.41911	-0.00987053	-0.269024
1.05_311.032			311.032	1.05	18	3	15	0.679257	0.453201	0.00282993	0.170603
3.78_386.157			386.157	3.78	28	13	15	0.678903	0.870381	0.0146017	0.376058
3.46_622.178			622.178	3.46	30	15	15	0.678765	0.662836	0.0126503	0.343565
6.16_976.55			976.55	6.16	21	6	15	0.677614	0.798847	0.0104952	0.237915
4.02_498.23			498.23	4.02	30	15	15	0.67687	0.536907	0.0135406	0.366286
1.49_264.006			264.006	1.49	30	15	15	0.673404	0.794233	-0.0132967	-0.361204
5.96_97.968			97.968	5.96	30	15	15	0.672371	0.923349	-0.0145099	-0.393962
6.23_477.285			477.285	6.23	30	15	15	0.672253	0.896902	0.0106711	0.289438
0.51_178.048			178.048	0.51	30	15	15	0.671863	0.598142	-0.00304125	-0.0832967
6.07_277.204			277.204	6.07	30	15	15	0.671451	0.424262	-0.0116266	-0.315615
N6-isopentenyladenosine	Cytokinin	C15H21N5O4	335.161	6.45	18	6	12	0.671425	0.567349	-0.0152489	-0.39121
5.96_334.143			334.143	5.96	30	15	15	0.670515	0.978565	-0.0148172	-0.402172
1.68_360.063			360.063	1.68	30	15	15	0.670258	0.567482	-0.0146577	-0.397318
4.45_556.269			556.269	4.45	30	15	15	0.66966	0.489132	-0.00735818	-0.200411
5.96_266.156			266.156	5.96	30	15	15	0.669612	0.989874	-0.0142779	-0.387654
0.6_182.027			182.027	0.6	30	15	15	0.668507	0.299876	-0.012558	-0.341455
3.15_456.06			456.06	3.15	30	15	15	0.668368	0.346424	-0.0136762	-0.371479
3.03_352.172			352.172	3.03	30	15	15	0.667463	0.572096	-0.0152292	-0.413387
1.52_298.128			298.128	1.52	30	15	15	0.667355	0.537188	0.0117022	0.317068
6.1_278.223			278.223	6.1	30	15	15	0.667086	0.226389	-0.00314832	-0.0858705
1.64_354.152			354.152	1.64	30	15	15	0.666926	0.538177	-0.00980841	-0.266719
1.72_226.095			226.095	1.72	30	15	15	0.666368	0.584682	0.0112656	0.305328
6.34_596.295			596.295	6.34	30	15	15	0.666165	0.454622	-0.00530238	-0.144386
2.83_328.08			328.08	2.83	29	14	15	0.665704	0.28607	-0.0139293	-0.392187
3.62_504.184			504.184	3.62	30	15	15	0.665436	0.298131	-0.0142194	-0.385535
1_176.032		C6H8O6	176.032	1	27	12	15	0.664871	0.820442	-0.0144299	-0.386576
Phenol fr 3	Phenolic	C6H6O	94.042	2.82	26	11	15	0.664669	0.574183	-0.00815021	-0.196112
6.36_541.337			541.337	6.36	30	15	15	0.664531	0.422215	-0.0142218	-0.386193
0.56_324.104			324.104	0.56	29	15	14	0.664415	0.46062	-0.00745908	-0.186887
1.64_400.158			400.158	1.64	30	15	15	0.664336	0.538107	-0.00978844	-0.266154
6.16_607.243			607.243	6.16	30	15	15	0.664174	0.938094	0.0127651	0.346032
3.15_322.162			322.162	3.15	30	15	15	0.664096	0.510944	0.0127709	0.345479
5.88_397.259			397.259	5.88	29	14	15	0.664011	0.691167	0.0144657	0.38179
3.68_470.199			470.199	3.68	30	15	15	0.663983	0.743686	0.00206625	0.0546218
5.11_244.167			244.167	5.11	30	15	15	0.663934	0.81182	-0.0132656	-0.360112
2.1_428.105			428.105	2.1	30	15	15	0.663674	0.48541	-0.00821151	-0.223436
1.57_463.073			463.073	1.57	29	15	14	0.662816	0.579295	-0.0151255	-0.409786
5.31_196.147			196.147	5.31	30	15	15	0.662494	0.636318	-0.0127229	-0.345564
2.44_139.063			139.063	2.44	29	14	15	0.661506	0.318016	-0.0126801	-0.315148
6.14_555.307			555.307	6.14	30	15	15	0.661029	1.00293	0.0110795	0.300204
1.76_316.08			316.08	1.76	30	15	15	0.660964	0.611999	-0.0141143	-0.383755
2.15_550.148			550.148	2.15	30	15	15	0.660724	0.57694	-0.00315293	-0.0865737
0.56_208.058			208.058	0.56	30	15	15	0.660308	0.529761	-0.0130673	-0.354872
1.49_176.032		C6H8O6	176.032	1.49	25	12	13	0.66015	0.531627	-0.0132264	-0.371347
1.74_238.051			238.051	1.74	29	15	14	0.658843	0.593825	-0.0130723	-0.384468
0.65_150.052			150.052	0.65	30	15	15	0.658379	0.511255	-0.0122934	-0.333717
5.38_242.152			242.152	5.38	30	15	15	0.658087	0.832448	-0.00997548	-0.271364
3.91_558.24			558.24	3.91	30	15	15	0.658055	0.845632	-0.015157	-0.410277
4.1_614.219			614.219	4.1	24	12	12	0.657715	0.508184	0.0151898	0.439675
1.11_244.07			244.07	1.11	30	15	15	0.657095	0.313483	-0.0051517	-0.139874
4.12_556.22			556.22	4.12	30	15	15	0.655171	0.744512	-0.0151524	-0.410778
4.37_642.154			642.154	4.37	30	15	15	0.65407	0.661627	-0.0149862	-0.40641
0.55_602.139			602.139	0.55	30	15	15	0.653468	0.608569	-0.0146032	-0.397224
3.23_620.205			620.205	3.23	30	15	15	0.647382	0.586816	-0.0127908	-0.346692
6.18_324.23			324.23	6.18	15	0	15	0.647034	0.444576	0.00397604	0.137394
3.3_472.159			472.159	3.3	29	14	15	0.646447	0.761854	-0.0148585	-0.406018
6.37_481.315			481.315	6.37	30	15	15	0.645238	0.441128	-0.0140248	-0.380827
6.06_701.312			701.312	6.06	30	15	15	0.643052	1.03088	0.0107243	0.290385
3.1_588.115			588.115	3.1	30	15	15	0.642787	0.504566	-0.0140491	-0.381037
3.75_404.059			404.059	3.75	30	15	15	0.642741	0.526931	-0.0134514	-0.365095
4.63_259.215			259.215	4.63	30	15	15	0.642459	0.416511	-0.0115434	-0.313611
6.31_310.181			310.181	6.31	30	15	15	0.641869	0.841553	-0.0133691	-0.363053
4.96_676.215			676.215	4.96	30	15	15	0.639982	0.93172	-0.0126353	-0.342634
2.7_358.125			358.125	2.7	30	15	15	0.639936	0.506044	-0.0147374	-0.400286
6.06_713.268			713.268	6.06	30	15	15	0.639483	1.10705	0.0123573	0.334935
3.75_239.954			239.954	3.75	30	15	15	0.639427	0.514623	-0.0135378	-0.367534
0.76_168.028			168.028	0.76	16	3	13	0.639079	0.363149	0.00609219	0.152325
0.56_260.066			260.066	0.56	30	15	15	0.637662	0.42494	-0.0135576	-0.368362
6.24_280.169			280.169	6.24	30	15	15	0.6375	0.479036	-0.013799	-0.37464
0.74_222.037			222.037	0.74	29	14	15	0.63699	0.523593	-0.0132503	-0.357574
1.5_204.009			204.009	1.5	30	15	15	0.636124	0.455439	-0.0108534	-0.29544
2.34_314.064			314.064	2.34	28	15	13	0.635412	0.658234	-0.0137527	-0.363081
5.31_240.136			240.136	5.31	30	15	15	0.635221	0.68416	-0.0113482	-0.308321
Coumaric acid glucoside 2	Phenolic glycoside	C15H18O8	326.1	2.72	30	15	15	0.634376	0.430599	-0.0146305	-0.39709
0.84_289.127			289.127	0.84	15	0	15	0.633797	0.282236	0.00022255	0.0271186
2.11_431.027			431.027	2.11	27	15	12	0.633419	0.578342	-0.0144356	-0.386817
1.49_341.984			341.984	1.49	30	15	15	0.633348	0.745104	-0.0122742	-0.33371
6.06_695.295			695.295	6.06	30	15	15	0.631337	1.05117	0.00922258	0.249671
3.75_195.965			195.965	3.75	30	15	15	0.631264	0.472257	-0.0130096	-0.353014
5.96_402.129			402.129	5.96	30	15	15	0.628396	0.998471	-0.0141316	-0.383476
Salicylic acid fr 4	SA derivative	C7H6O3	138.032	2.45	30	15	15	0.628374	0.692676	-0.0111151	-0.301855
Coumaric acid glucoside 5	Phenolic glycoside	C15H18O8	326.099	3.04	30	15	15	0.627861	0.557501	-0.0128115	-0.346971
3.76_346.032			346.032	3.76	30	15	15	0.62762	0.411458	-0.0121574	-0.330091
1.08_438.104			438.104	1.08	29	14	15	0.624918	0.447937	0.00628117	0.172875
5.96_351.132			351.132	5.96	30	15	15	0.624739	1.07912	-0.0142179	-0.385843
3.79_230.031			230.031	3.79	30	15	15	0.624096	0.48467	-0.0124956	-0.339662
5.18_388.293			388.293	5.18	30	15	15	0.62342	0.846442	-0.0131392	-0.356961
4.08_214.022			214.022	4.08	30	15	15	0.623015	0.586583	-0.0102698	-0.279388
6.14_582.326			582.326	6.14	30	15	15	0.622558	0.97809	0.00804565	0.217967
4.98_254.152			254.152	4.98	30	15	15	0.617153	0.846834	-0.0119653	-0.324865
2.31_386.085			386.085	2.31	30	15	15	0.617061	0.832782	-0.0142056	-0.385552
Deoxystrigol-like 2	Strigolactone	C19H22O5	330.146	3.48	30	15	15	0.616584	0.885238	-0.011763	-0.319734
4.3_498.23			498.23	4.3	30	15	15	0.615297	0.496471	-0.00575823	-0.15752
2.97_492.131			492.131	2.97	27	15	12	0.614223	0.661707	-0.0140078	-0.370691
2.12_446.135			446.135	2.12	28	14	14	0.614156	0.70268	0.0132553	0.35802
1.03_224.036			224.036	1.03	30	15	15	0.613121	0.262478	-0.00982841	-0.267432
3.09_796.239			796.239	3.09	30	15	15	0.612866	0.762073	-0.0138122	-0.375697
1.74_142.026			142.026	1.74	30	15	15	0.611368	0.472833	-0.0117536	-0.319848
3.45_459.156			459.156	3.45	15	0	15	0.610619	0.428656	0.00555035	0.179779
4.06_514.209			514.209	4.06	30	15	15	0.609759	0.575471	-0.012946	-0.351056
Salicin 1 (FA)	Salicinoid	C14H20O9	332.111	2.12	30	15	15	0.609491	0.348733	-0.0140967	-0.381918
6.14_649.298			649.298	6.14	30	15	15	0.608828	1.02428	0.00772568	0.209108
3.83_698.386			698.386	3.83	30	15	15	0.60758	0.870423	-0.0114815	-0.312139
3.71_518.199			518.199	3.71	25	12	13	0.607464	0.646252	-0.0131665	-0.328675
4.98_210.162			210.162	4.98	30	15	15	0.60737	0.873219	-0.0122925	-0.333553
3.75_348.031			348.031	3.75	30	15	15	0.606627	0.473678	-0.0122679	-0.33319
1.01_277.024			277.024	1.01	30	15	15	0.606553	0.880707	0.0117493	0.319229
2.12_490.194			490.194	2.12	21	9	12	0.606118	0.576952	0.0120839	0.316747
4.22_376.281			376.281	4.22	30	15	15	0.605468	0.351449	-0.00456598	-0.123682
5.75_278.188			278.188	5.75	30	15	15	0.605315	0.709622	-0.0091023	-0.247299
OH-Tremuloidin-like 2	Salicinoid	C20H22O9	406.127	3.8	30	15	15	0.604871	0.612599	-0.0139687	-0.378932
1.32_386.089			386.089	1.32	30	15	15	0.604136	0.483376	-0.00692963	-0.189436
3.1_474.172			474.172	3.1	18	10	8	0.603133	0.39694	-0.00142016	-0.260301
Phenol fr 5	Phenolic	C6H6O	94.042	4.61	30	15	15	0.602811	0.952623	-0.0134311	-0.364193
3.15_260.126			260.126	3.15	30	15	15	0.602263	0.676673	-0.0116506	-0.316531
3.55_520.194			520.194	3.55	30	15	15	0.602136	0.443148	-0.0139157	-0.377766
6.15_679.316			679.316	6.15	30	15	15	0.601138	0.996349	0.00806126	0.218387
3.1_504.179			504.179	3.1	30	15	15	0.599192	0.906262	-0.0137814	-0.374021
1.58_416.056			416.056	1.58	30	15	15	0.599081	0.560451	-0.0136024	-0.3693
3.58_208.072			208.072	3.58	30	15	15	0.599047	0.960958	-0.0128003	-0.34711
3.46_554.218			554.218	3.46	30	15	15	0.598075	0.555069	-0.0131742	-0.357231
4.1_546.23			546.23	4.1	30	15	15	0.597274	0.676102	0.0103553	0.279885
6.32_518.323			518.323	6.32	25	11	14	0.596696	0.670065	-0.0132187	-0.349151
6.06_717.283			717.283	6.06	30	15	15	0.596465	0.927385	0.0100042	0.270889
3.74_402.152			402.152	3.74	28	13	15	0.595727	0.557953	-0.0133182	-0.38086
6.08_298.16			298.16	6.08	30	15	15	0.593708	0.64049	-0.013142	-0.356472
0.63_167.904			167.904	0.63	30	15	15	0.593313	0.514958	-0.0102436	-0.278842
3.8_704.224			704.224	3.8	28	14	14	0.593172	0.694471	-0.0115228	-0.342126
3.75_241.952			241.952	3.75	30	15	15	0.5929	0.460054	-0.0122782	-0.333359
4.98_178.099			178.099	4.98	30	15	15	0.5907	0.651081	-0.0112666	-0.306128
3.73_308.01			308.01	3.73	30	15	15	0.590413	0.691214	-0.0128602	-0.349365
0.54_107.988			107.988	0.54	30	15	15	0.590286	0.470775	-0.0104838	-0.285693
0.95_254.046			254.046	0.95	30	15	15	0.590101	0.867774	-0.0122163	-0.332247
1.21_282			282	1.21	30	15	15	0.5894	0.617206	-0.0136287	-0.370107
4.95_362.097			362.097	4.95	30	15	15	0.588407	0.51532	-0.010502	-0.285199
6.21_298.25			298.25	6.21	30	15	15	0.587206	0.240523	-0.00305871	-0.083594
3.01_173.105			173.105	3.01	30	15	15	0.585671	0.630231	-0.000160844	-0.00561726
Cinnamoyl glucose 1	Phenolic glycoside	C15H18O7	310.106	3.29	30	15	15	0.585332	0.549936	-0.0115797	-0.314411
2.24_311.1			311.1	2.24	30	15	15	0.58442	0.476263	-0.00729416	-0.199375
1.49_348.152			348.152	1.49	30	15	15	0.583091	0.446157	-0.0101059	-0.275346
3.58_394.183			394.183	3.58	29	14	15	0.582526	0.493058	0.00834367	0.209934
3.75_226.01			226.01	3.75	30	15	15	0.580548	0.542437	-0.0124348	-0.337343
1.56_469.024			469.024	1.56	30	15	15	0.580281	0.708941	0.00444287	0.118797
Salicyl aldehyde/Benzoic acid 2	Salicinoid	C7H6O2	122.037	2.68	25	14	11	0.580018	0.520465	-0.0121542	-0.326453
4.55_252.103			252.103	4.55	30	15	15	0.579599	0.544644	-0.0086958	-0.236742
6.34_664.283			664.283	6.34	30	15	15	0.579551	0.407036	-0.00451105	-0.122768
3.87_676.161			676.161	3.87	28	14	14	0.579425	0.399077	-0.0110971	-0.330874
0.63_165.907			165.907	0.63	30	15	15	0.579252	0.503686	-0.00832114	-0.226753
4.36_498.232			498.232	4.36	30	15	15	0.579051	0.73455	0.0118354	0.320859
3.38_487.132			487.132	3.38	30	15	15	0.578879	0.247797	-0.0133123	-0.360738
2.02_494.162			494.162	2.02	30	15	15	0.578759	0.449249	-0.0125444	-0.340842
6.15_505.315			505.315	6.15	30	15	15	0.57854	0.365716	-0.0112088	-0.304574
1.17_134.058			134.058	1.17	30	15	15	0.577597	0.6566	-0.0129701	-0.352376
4.85_282.148			282.148	4.85	21	12	9	0.576851	0.595355	-0.01241	-0.328596
1.61_320.111			320.111	1.61	30	15	15	0.576661	0.444732	-0.0132708	-0.360536
1.5_370.147			370.147	1.5	30	15	15	0.575678	0.595478	-0.0133169	-0.362089
Indole-3-acetonitrile	Trp/auxin metabolism	C10H8N2	156.069	2.12	15	3	12	0.573456	0.513021	0.01322	0.405163
1.64_452.128			452.128	1.64	30	15	15	0.57295	0.52605	-0.000966253	-0.0267564
2_312.141			312.141	2	26	11	15	0.571925	0.485447	0.00207158	-0.00831051
6.36_609.32			609.32	6.36	30	15	15	0.571456	0.572994	-0.0121574	-0.330273
2.17_311.1			311.1	2.17	30	15	15	0.571196	0.498423	-0.00719185	-0.196499
6.14_633.324			633.324	6.14	30	15	15	0.571152	0.987623	0.00730515	0.197742
5.13_344.261			344.261	5.13	30	15	15	0.567585	0.451754	0.00309137	0.0832398
3.38_460.113			460.113	3.38	30	15	15	0.567484	0.353843	-0.013126	-0.355874
2.05_294.131			294.131	2.05	30	15	15	0.566831	0.536572	-0.0129037	-0.350689
Grandidentatin 1	Salicinoid	C21H28O9	424.174	3.97	30	15	15	0.565686	0.911427	-0.0130693	-0.354592
3.76_241.98			241.98	3.76	30	15	15	0.562297	0.432844	-0.011618	-0.315248
3.76_157.045			157.045	3.76	30	15	15	0.560947	0.473739	-0.0104063	-0.282679
3.39_322.161			322.161	3.39	17	13	4	0.560224	0.296365	-0.00722917	-0.168679
2.14_394.105			394.105	2.14	30	15	15	0.558222	0.556479	-0.0127682	-0.34705
1.76_432.048			432.048	1.76	28	15	13	0.557283	0.606432	-0.0117776	-0.289478
3.81_504.219			504.219	3.81	30	15	15	0.557185	0.50697	-0.00616652	-0.167982
3.29_688.161			688.161	3.29	30	15	15	0.55718	0.311457	-0.0112435	-0.304442
6.24_559.23			559.23	6.24	30	15	15	0.556402	0.959213	0.00726955	0.197318
3.1_182.021			182.021	3.1	28	15	13	0.555087	0.68622	-0.0114158	-0.315661
3.9_556.23			556.23	3.9	30	15	15	0.554974	0.850372	-0.011891	-0.321974
5.9_502.397			502.397	5.9	29	14	15	0.553712	0.494679	-0.00785338	-0.199856
0.51_382.095			382.095	0.51	30	15	15	0.552488	0.626337	-0.0122558	-0.332661
2.76_614.183			614.183	2.76	29	15	14	0.550358	0.563078	-0.0123062	-0.316534
1.6_475.079			475.079	1.6	23	11	12	0.548822	0.791003	-0.0106681	-0.289324
3.94_646.303			646.303	3.94	30	15	15	0.548554	0.721682	-0.00167412	-0.0465185
2.83_354.151			354.151	2.83	20	7	13	0.548428	0.445169	-0.011721	-0.358592
2.12_320.059			320.059	2.12	16	3	13	0.547354	0.694287	0.0125119	0.361549
2.14_324.142			324.142	2.14	30	15	15	0.546996	0.477243	0.00202425	0.0538055
0.77_178.048			178.048	0.77	30	15	15	0.546671	0.733668	-0.00742457	-0.201773
2.8_386.082			386.082	2.8	30	15	15	0.54221	0.795209	-0.0124261	-0.337953
3.76_368.066			368.066	3.76	30	15	15	0.541534	0.464534	-0.0113404	-0.307818
3.54_428.111			428.111	3.54	29	15	14	0.540044	0.426828	-0.0123671	-0.338082
3.4_368.204			368.204	3.4	30	15	15	0.54003	0.934234	-0.0115108	-0.312751
3.83_424.173			424.173	3.83	30	15	15	0.539851	0.466418	-0.0116869	-0.316786
3.21_486.229			486.229	3.21	30	15	15	0.539649	0.423099	-0.00391236	-0.107175
3.76_197.991			197.991	3.76	30	15	15	0.538507	0.400438	-0.0108282	-0.293852
3.89_146.094			146.094	3.89	30	15	15	0.536934	0.515159	-0.00442384	-0.120396
3.38_462.113			462.113	3.38	28	14	14	0.535912	0.4769	-0.0115919	-0.330855
1.2_367.103			367.103	1.2	30	15	15	0.535903	0.772181	-0.0123895	-0.336645
2.45_300.007			300.007	2.45	30	15	15	0.53566	0.645978	-0.00774344	-0.210367
Tremulacin	Salicinoid	C27H28O11	528.163	4.37	30	15	15	0.534888	0.661638	-0.0123491	-0.334761
1.74_114.031			114.031	1.74	29	15	14	0.53421	0.460564	-0.00893269	-0.240157
3.38_538.129			538.129	3.38	30	15	15	0.533072	0.384014	-0.0121634	-0.329652
3.73_274.038			274.038	3.73	30	15	15	0.532211	0.978126	-0.0123097	-0.333883
3.47_514.261			514.261	3.47	30	15	15	0.530492	0.451055	-0.00249083	-0.0677825
1.08_195.057			195.057	1.08	30	15	15	0.530028	0.600496	-0.00847191	-0.230575
2.91_492.182			492.182	2.91	30	15	15	0.529858	0.432446	-0.00862493	-0.234939
0.75_210.02			210.02	0.75	22	9	13	0.529558	0.440054	-0.0102828	-0.243878
3.89_528.223			528.223	3.89	21	12	9	0.528827	0.327483	0.00221128	-0.0885602
3.38_540.109			540.109	3.38	28	14	14	0.528461	0.441647	-0.011747	-0.331037
3.75_272.015			272.015	3.75	30	15	15	0.527403	0.537621	-0.0107995	-0.292968
6.29_508.338			508.338	6.29	15	0	15	0.525726	0.396646	0.00507407	0.163843
0.72_225.031			225.031	0.72	30	15	15	0.52414	0.606393	0.0121246	0.328521
Galloyl glucose	Phenolic glycoside	C13H16O10	332.074	1.59	30	15	15	0.524103	0.454726	-0.0115494	-0.31341
3.78_698.387			698.387	3.78	30	15	15	0.523489	0.51769	-0.00895909	-0.243308
0.63_163.91			163.91	0.63	30	15	15	0.519847	0.414117	-0.00567171	-0.154951
5.46_290.187			290.187	5.46	15	0	15	0.519545	0.392767	0.00730674	0.225512
2.15_472.131			472.131	2.15	28	14	14	0.519191	0.517448	-0.00115429	-0.0463487
1.55_537.12			537.12	1.55	30	15	15	0.517818	0.583921	-0.0119465	-0.323261
4.76_558.267			558.267	4.76	21	12	9	0.517681	0.372151	-0.00890817	-0.360806
6.14_713.268			713.268	6.14	30	15	15	0.514556	0.9878	0.00715214	0.193782
3.35_164.049			164.049	3.35	30	15	15	0.51435	0.781314	-0.0118977	-0.323148
1.64_200.014			200.014	1.64	30	15	15	0.513202	0.836232	-0.010863	-0.294956
3.73_230.031			230.031	3.73	30	15	15	0.511374	0.660322	-0.0103717	-0.281516
5.35_268.166			268.166	5.35	30	15	15	0.510988	0.883588	-0.0117025	-0.317676
1.34_249.067			249.067	1.34	15	0	15	0.509804	0.455417	0.00596293	0.188257
3.76_470.124			470.124	3.76	30	15	15	0.506771	0.224621	0.000207947	0.00498251
6.06_817.491			817.491	6.06	26	13	13	0.506538	0.28986	0.00203771	0.0744883
3.76_324.021			324.021	3.76	30	15	15	0.505756	0.669289	-0.0104852	-0.284497
0.59_188.079			188.079	0.59	29	14	15	0.505682	0.305216	-0.0113633	-0.309592
Deoxyhexopyranose 1		C6H12O5	164.069	0.53	30	15	15	0.505072	0.339009	-0.00317166	-0.0859516
1.01_131.095			131.095	1.01	30	15	15	0.505062	0.564927	0.00678242	0.184315
cis-12-oxo-phytodienoic acid	Jasmonate	C18H28O3	292.203	5.91	30	15	15	0.503739	0.614551	-0.0107617	-0.291484
HCH-Salicortin	Salicinoid	C27H30O13	562.168	3.87	28	14	14	0.503154	0.382007	-0.00973299	-0.2893
0.89_276.094			276.094	0.89	28	14	14	0.503076	0.462163	-0.00174364	-0.0613265
Tremulacin (FA)	Salicinoid	C28H30O13	574.167	4.37	30	15	15	0.502857	0.677456	-0.0116188	-0.314936
5.57_308.198			308.198	5.57	15	0	15	0.501732	0.483117	0.0071747	0.220856
4.66_712.198			712.198	4.66	27	14	13	0.501698	0.720591	-0.0102151	-0.30112
Coumaric acid glucoside 1	Phenolic glycoside	C15H18O8	326.1	2.64	30	15	15	0.498432	0.539212	-0.00752888	-0.204931
1.44_397.043			397.043	1.44	30	15	15	0.49757	0.546465	-0.00958618	-0.259895
4.29_185.99			185.99	4.29	30	15	15	0.49655	0.619442	-0.00834104	-0.22644
4.07_532.211			532.211	4.07	30	15	15	0.495939	0.705876	0.00676471	0.182756
1.65_378.115			378.115	1.65	30	15	15	0.49521	0.841325	-0.0110539	-0.300038
2.12_159.089			159.089	2.12	30	15	15	0.494018	0.486813	-0.00259726	-0.0713489
6.37_453.285			453.285	6.37	30	15	15	0.493377	0.835728	0.0086888	0.235441
Salicyl alcohol	Salicinoid	C7H8O2	124.052	2.12	29	15	14	0.493288	0.47933	-0.0109527	-0.306307
Phenol fr 1	Phenolic	C6H6O	94.042	2.12	29	15	14	0.492722	0.489641	-0.0108486	-0.304848
4.99_224.035			224.035	4.99	30	15	15	0.492217	0.54124	-0.0104173	-0.282856
2.12_349.101			349.101	2.12	24	12	12	0.491715	0.401444	-0.00829453	-0.254219
4.02_698.382			698.382	4.02	30	15	15	0.4916	0.841796	-0.0103715	-0.281804
2.82_425.981			425.981	2.82	30	15	15	0.491352	0.381682	-0.0111985	-0.304756
5.26_310.213			310.213	5.26	30	15	15	0.491344	0.316087	-0.00431428	-0.116973
5.28_222.16			222.16	5.28	30	15	15	0.49087	0.686556	-0.0096705	-0.26296
Salicylic acid fr 3	SA derivative	C7H6O3	138.032	2.28	30	15	15	0.490216	0.301151	-0.0113191	-0.307001
3.76_548.076			548.076	3.76	30	15	15	0.488998	0.526604	-0.00998556	-0.271112
2.93_448.122			448.122	2.93	25	10	15	0.488972	0.434669	0.0103308	0.26787
3.74_230.035			230.035	3.74	30	15	15	0.488696	0.566174	-0.0108356	-0.293871
3.99_696.371			696.371	3.99	30	15	15	0.488053	0.777417	-0.0112683	-0.305453
5.96_554.291			554.291	5.96	30	15	15	0.487329	0.916797	-0.0105171	-0.285679
2.52_404.132			404.132	2.52	28	15	13	0.48701	0.408045	-0.0109737	-0.295475
1.5_160.019			160.019	1.5	30	15	15	0.486667	0.378929	-0.00855045	-0.2326
6.31_378.169			378.169	6.31	30	15	15	0.486465	0.776627	-0.0112247	-0.304879
5.75_315.277			315.277	5.75	25	15	10	0.486173	0.22466	-0.00140298	-0.00426756
3.82_188.105			188.105	3.82	30	15	15	0.484416	0.944145	-0.00971069	-0.263639
1.57_220.058			220.058	1.57	19	8	11	0.483708	0.481018	-0.00905344	-0.285177
4.16_460.207			460.207	4.16	30	15	15	0.48114	0.418869	-0.00865795	-0.234825
2.62_322.048			322.048	2.62	15	0	15	0.480248	0.350285	0.00686773	0.212105
3.66_262.141			262.141	3.66	30	15	15	0.479554	0.800821	-0.00877763	-0.238595
3.87_704.224			704.224	3.87	28	14	14	0.477237	0.397479	-0.00857891	-0.26045
2.9_131.095			131.095	2.9	27	12	15	0.473591	0.241667	0.00996944	0.25209
3.75_286.979			286.979	3.75	30	15	15	0.473107	0.511738	-0.0101876	-0.276281
6.05_298.16			298.16	6.05	30	15	15	0.470984	0.715545	-0.0104072	-0.282183
3.38_468.161			468.161	3.38	29	15	14	0.470862	0.464529	-0.0108592	-0.297254
3.51_336.178			336.178	3.51	30	15	15	0.469728	0.26767	0.0104022	0.281101
0.51_194.079			194.079	0.51	30	15	15	0.469655	0.263743	-0.00165441	-0.0458363
4.11_302.095			302.095	4.11	25	10	15	0.468748	0.245882	-0.0094826	-0.214036
1.49_376.022			376.022	1.49	25	12	13	0.468394	0.759009	-0.0103495	-0.274253
Salicyl aldehyde/Benzoic acid 3	Salicinoid	C7H6O2	122.037	2.86	30	15	15	0.468266	0.98879	0.00543057	0.147255
3.29_522.21			522.21	3.29	30	15	15	0.46671	0.408398	-0.0105243	-0.2851
3.01_446.177			446.177	3.01	28	13	15	0.465439	0.469211	-0.00546763	-0.12882
5.33_310.18			310.18	5.33	30	15	15	0.464715	0.617202	-0.00591393	-0.160681
3.79_258.026			258.026	3.79	30	15	15	0.463462	0.630549	-0.00957174	-0.25958
3.64_448.183			448.183	3.64	30	15	15	0.463222	0.807617	-0.0106303	-0.288571
Syringin 1	Sinapate derivative	C17H24O9	372.141	3.17	30	15	15	0.463036	0.856817	-0.0106216	-0.288336
6.14_695.295			695.295	6.14	30	15	15	0.459305	0.857297	0.00415177	0.112176
2.16_294.131			294.131	2.16	30	15	15	0.458916	0.520012	-0.00992045	-0.269771
1.24_634.13			634.13	1.24	30	15	15	0.458912	0.706786	-0.0071844	-0.195003
0.76_743.073			743.073	0.76	28	13	15	0.457251	0.884364	0.00727805	0.207048
1.43_283.092			283.092	1.43	30	15	15	0.456438	0.354242	5.47617e-05	0.00118196
Catechol/Hydroquinone 3	Phenolic	C6H6O2	110.036	2.31	30	15	15	0.456347	0.851956	-0.0103592	-0.281027
3.38_523.053			523.053	3.38	28	14	14	0.455076	0.43604	-0.0104383	-0.287498
4.37_564.139			564.139	4.37	26	14	12	0.454752	0.685095	-0.010348	-0.293087
Salicortin	Salicinoid	C20H24O10	424.137	3.38	30	15	15	0.453886	0.386031	-0.0104744	-0.283773
1.28_258.084			258.084	1.28	28	14	14	0.453842	0.716152	-0.00538343	-0.144715
1_261.052			261.052	1	30	15	15	0.453546	0.963329	0.00925654	0.251752
3.76_464.116			464.116	3.76	30	15	15	0.452711	0.493645	-0.0092376	-0.250743
3.78_436.133			436.133	3.78	30	15	15	0.450844	0.660952	-0.0099506	-0.26983
3.93_340.101			340.101	3.93	28	13	15	0.450087	0.397285	0.00730542	0.169647
3.75_210.042			210.042	3.75	30	15	15	0.449477	0.614746	-0.0100926	-0.273812
3.87_625.163			625.163	3.87	26	14	12	0.446198	0.394079	-0.00871864	-0.256972
2.45_251.928			251.928	2.45	19	10	9	0.44616	0.339589	-0.00731065	-0.247789
Salicortin (FA)	Salicinoid	C21H26O12	470.142	3.38	30	15	15	0.445938	0.362996	-0.0102096	-0.276646
1.24_261.95			261.95	1.24	29	15	14	0.445348	0.430948	-0.00379089	-0.0907672
1.82_444.183			444.183	1.82	30	15	15	0.445194	0.485438	-0.00706772	-0.192144
HCH-Salicortin (FA)	Salicinoid	C28H32O15	608.173	3.87	30	15	15	0.441539	0.406257	-0.0102109	-0.27706
2.41_180.062			180.062	2.41	28	14	14	0.441188	0.588713	-0.00904695	-0.277022
5.28_294.183			294.183	5.28	30	15	15	0.441053	0.562982	-0.00844127	-0.229597
6.27_541.336			541.336	6.27	30	15	15	0.440117	0.227719	-0.00663638	-0.18067
3.71_284.089			284.089	3.71	24	11	13	0.439632	0.670018	-0.00998866	-0.275801
5.96_570.266			570.266	5.96	21	12	9	0.439426	0.61891	-0.0101297	-0.271012
3.39_384.198			384.198	3.39	26	11	15	0.439315	0.445243	0.0100747	0.278777
4.19_166.987			166.987	4.19	30	15	15	0.438834	0.543625	-0.00920986	-0.249909
1.44_368.091			368.091	1.44	30	15	15	0.434998	0.240281	-0.00346685	-0.0941349
2.45_328.959			328.959	2.45	30	15	15	0.431644	0.624557	-0.00403326	-0.109682
5.97_524.332			524.332	5.97	15	0	15	0.430997	0.342906	0.00652737	0.196968
3.76_328.066			328.066	3.76	30	15	15	0.430571	0.523078	-0.00885675	-0.240348
2.73_418.147			418.147	2.73	30	15	15	0.428559	0.730959	-0.00989508	-0.268197
6.14_717.282			717.282	6.14	30	15	15	0.427684	0.843221	0.00311241	0.0839142
Mevalonic acid 2	MVA	C6H12O4	148.073	1.52	30	15	15	0.426167	0.932598	-0.00896655	-0.244332
5.67_310.213			310.213	5.67	30	15	15	0.425324	0.780874	0.00961861	0.260922
1.63_390.128			390.128	1.63	30	15	15	0.424833	0.731253	0.00982681	0.267102
1.73_290.1			290.1	1.73	30	15	15	0.424128	0.941292	0.00745354	0.200737
2.62_238.096			238.096	2.62	15	0	15	0.424021	0.371362	0.00646094	0.198806
Arbutin/hydroquinone glucoside-like	Phenolic glycoside	C12H16O7	272.09	2.31	30	15	15	0.423766	0.847229	-0.00956879	-0.259528
3.68_333.994			333.994	3.68	30	15	15	0.423328	0.840358	0.00952378	0.258442
Salicylic acid glucoside 3	SA derivative	C13H16O8	300.084	2.44	27	13	14	0.420825	0.512862	0.00645035	0.218094
1.15_224.035			224.035	1.15	30	15	15	0.420727	0.423562	-0.0045404	-0.124295
3.8_274.038			274.038	3.8	30	15	15	0.420427	0.54776	-0.00895054	-0.242797
2.12_156.069			156.069	2.12	28	13	15	0.419213	0.633566	-0.00652707	-0.209466
0.58_189.064			189.064	0.58	30	15	15	0.419087	0.363616	0.0034718	0.0942138
[truncated: 157 more rows]
