# Supplementary material for: Regulation of pectin remodeling and ectomycorrhiza development by cell wall localized proanthocyanidins in hybrid aspen roots
Source: Research Square preprint supplement (doi:10.21203/rs.3.rs-6966375/v1), 2025-07-04
Supplement: Supplementary file 6 [file 851878680cc2093307b03075.xlsx]

## Sheet: S5_Linear_models
Supplementary Table S5. The effects of treatment and time (days) on the levels of mass features (UPLC-MS/QTOF/ESI-) tested with linear models. P-values were FDR-adjusted (False discovery rate) for multiple comparisons, P-value <0.05 was considered significant. The log2 fold changes are colored based on higher (orange) and lower (turquoise) levels in the ectomycorrhizal (ECM) roots than in the con…
Treatment									Time										Time, control										Time, ECM
Mass feature	logFC (ECM/C)	AveExpr	t	P.Value	FDR adj.P.Val	B		Mass feature	7d/3d	14d/3d	21d/3d	28d/3d	AveExpr	F	P.Value	FDR adj.P.Val		Mass feature	7d/3d	14d/3d	21d/3d	28d/3d	AveExpr	F	P.Value	FDR adj.P.Val		Mass feature	7d/3d	14d/3d	21d/3d	28d/3d	AveExpr	F	P.Value	FDR adj.P.Val
1.77_139.063	-1.9336	-1.8504e-17	-8.1093	1.124e-11	2.4952e-08	16.306		4.1_546.23	1.3605	2.2703	2.2499	2.4016	1.6769e-18	6.7245	2.0844e-05	0.027013		2.89_440.186	1.0311	1.5224	2.7469	1.6734	7.1702e-17	4.8344	0.0017801	0.038388		4.05_566.203	1.3499	1.906	2.5433	2.1064	-6.9389e-18	4.4972	0.0024878	0.04236
3.28_324.142	1.8692	3.8858e-17	7.6093	9.3883e-11	1.0421e-07	14.272		3.1_550.225	1.3006	1.9244	2.4629	2.1498	-4.3137e-17	6.203	5.4879e-05	0.027013		3.2_408.199	1.1902	1.8757	2.7106	1.9716	2.8681e-17	5.0926	0.0012414	0.038388		2.12_334.048	1.824	2.3581	2.5352	1.8961	6.0137e-18	4.802	0.0015891	0.04236
3.28_392.127	1.8133	2.4055e-17	7.2088	5.1071e-10	3.4798e-07	12.648		3.94_646.303	1.3287	1.9743	2.4208	2.183	-4.5334e-17	6.1851	5.6734e-05	0.027013		4.26_528.274	1.3826	2.1116	2.7099	2.1369	4.9035e-17	5.4242	0.00078449	0.038388		2.12_272.077	1.636	2.374	2.5303	1.9627	-4.811e-17	4.853	0.0014747	0.04236
3.65_412.214	1.8063	7.4015e-18	7.1602	6.2699e-10	3.4798e-07	12.451		1.49_348.152	0.95974	1.8367	2.159	2.3321	-2.0077e-16	6.1646	5.8921e-05	0.027013		3.53_456.22	1.3011	2.0028	2.6997	1.4495	-1.8504e-18	4.8088	0.001845	0.038388		2.12_288.048	1.6367	2.3233	2.4953	1.8215	-2.1279e-17	4.5818	0.002196	0.04236
2.76_302.095	-1.7686	-1.3566e-16	-6.9078	1.8123e-09	7.8166e-07	11.434		4.02_498.23	1.0441	1.6698	2.316	2.2012	-9.0206e-18	5.9305	9.0797e-05	0.027013		3.98_484.215	0.9601	1.8087	2.687	1.5163	1.4826e-16	4.8191	0.0018186	0.038388		2.91_492.182	1.2408	1.708	2.4908	1.9989	-4.6259e-19	4.1179	0.0043616	0.04236
5.89_296.235	1.763	-6.6613e-17	6.8712	2.1126e-09	7.8166e-07	11.287		3.06_323.1	0.95915	1.6985	2.3176	2.1159	-2.1164e-17	5.8761	0.00010039	0.027013		2.72_472.179	1.414	1.7821	2.6862	1.7785	3.5157e-17	4.5505	0.0026539	0.038388		2.12_350.02	1.5881	2.1729	2.4753	1.8506	-4.6259e-17	4.2924	0.003367	0.04236
3.06_322.163	1.7436	2.0817e-17	6.7457	3.572e-09	9.2637e-07	10.783		4.13_714.381	0.58503	1.8875	1.8852	2.1354	-4.7994e-18	5.8601	0.00010339	0.027013		3.25_512.168	1.53	1.9977	2.6719	2.1426	2.3708e-17	5.0609	0.0012974	0.038388		2.92_472.215	1.6079	2.2983	2.4733	2.3278	-8.1416e-17	5.0497	0.0011062	0.04236
3.3_459.194	-1.7387	2.3592e-17	-6.715	4.0602e-09	9.2637e-07	10.661		3.58_394.183	1.2141	2.1244	2.2696	1.9843	7.4593e-18	5.7951	0.00011655	0.027013		2.54_426.173	1.2603	2.2346	2.6702	1.8859	1.9891e-17	5.323	0.00090193	0.038388		3.06_323.1	0.90755	1.9188	2.4707	2.2898	-9.2519e-18	5.2009	0.00088759	0.04236
3.11_296.147	-1.7368	3.7007e-18	-6.7027	4.2744e-09	9.2637e-07	10.611		1.63_549.207	0.81475	1.6719	2.0266	2.2804	2.683e-17	5.7769	0.00012051	0.027013		3.1_550.225	1.226	1.9377	2.6656	2.2777	-8.8818e-17	5.4914	0.00071517	0.038388		2.12_117.058	1.4501	2.4481	2.4665	1.883	3.4463e-17	4.8728	0.0014323	0.04236
2.76_102.068	-1.7348	1.3091e-16	-6.6903	4.5022e-09	9.2637e-07	10.562		2.15_550.148	1.3956	2.0787	2.4491	1.6514	-2.5211e-17	5.7487	0.00012692	0.027013		3.51_336.178	1.6969	1.4775	2.6609	1.7664	3.7007e-18	4.383	0.0033642	0.038388		Tryptophan	1.3559	2.371	2.4535	1.814	-1.471e-16	4.6803	0.0018999	0.04236
4.16_901.371	-1.7341	-7.6125e-17	-6.6856	4.5901e-09	9.2637e-07	10.543		Phenol fr 3	1.6158	2.0073	2.4654	1.2795	1.6763e-16	5.715	0.00013504	0.027013		3.2_454.208	1.2901	1.8793	2.6532	2.0195	-9.3444e-17	4.8567	0.0017252	0.038388		3.1_550.225	1.5322	2.1022	2.4427	2.1977	1.2953e-17	4.5093	0.0024437	0.04236
2.85_438.173	-1.73	1.3878e-17	-6.66	5.1069e-09	9.4478e-07	10.441		2.82_425.981	0.92263	1.2592	1.9788	2.385	-1.9521e-16	5.6725	0.00014602	0.027013		3.25_440.189	1.5684	2.2795	2.651	2.0042	3.3168e-16	5.2174	0.0010438	0.038388		1.84_339.095	1.4199	1.9853	2.4258	2.5569	-4.7184e-17	5.1521	0.00095285	0.04236
2.37_282.131	-1.7268	-3.8424e-17	-6.64	5.5512e-09	9.4798e-07	10.361		0.54_107.988	1.3255	1.6807	2.1547	2.3295	-7.0545e-18	5.604	0.0001656	0.027332		2.79_396.163	1.3476	2.0929	2.6484	2.0421	-2.313e-19	5.0849	0.0012547	0.038388		4_552.202	1.7489	1.8314	2.4203	2.1154	1.1657e-16	4.092	0.0045325	0.04236
4.26_583.168	-1.7183	-1.1357e-16	-6.5868	6.9284e-09	1.0821e-06	10.149		2.17_311.1	1.4315	1.854	2.2875	2.1531	1.5081e-16	5.5822	0.00017237	0.027332		3.53_368.204	1.5919	1.8189	2.6478	1.6428	-5.4123e-17	4.3591	0.0034803	0.038388		2.12_320.059	1.4623	2.034	2.4197	1.6321	-1.5636e-16	3.8572	0.0064275	0.043033
3.55_334.198	-1.7154	-6.8464e-17	-6.5687	7.4683e-09	1.0821e-06	10.077		2.1_428.105	0.663	2.0329	1.9632	0.49211	2.0585e-16	5.4926	0.00020315	0.027673		2.8_479.163	1.4551	2.1947	2.6464	1.8373	-2.4679e-16	4.9644	0.001484	0.038388		0.77_95.037	1.5624	2.344	2.4177	1.5977	9.4832e-18	4.386	0.0029316	0.04236
3.1_425.074	-1.7129	1.3274e-16	-6.5534	7.9598e-09	1.0821e-06	10.016		0.63_163.91	1.0038	1.7072	1.6729	2.4151	-1.4601e-17	5.4053	0.00023839	0.027673		3.74_552.27	1.1356	1.9992	2.6442	1.7037	7.494e-17	4.8073	0.001849	0.038388		2.1_506.123	1.677	1.8963	2.4168	0.92111	-6.06e-17	4.0551	0.0047878	0.04236
Prodelphinidin dimer 9	-1.7113	-1.5034e-17	-6.5437	8.2866e-09	1.0821e-06	9.9771		2.57_296.053	0.21683	1.5723	1.4682	2.07	9.4832e-17	5.3648	0.00025673	0.027673		3.3_434.173	0.95584	1.8217	2.6419	1.7687	2.5905e-17	4.8442	0.0017557	0.038388		1.63_549.207	1.3953	2.0518	2.3825	2.3863	5.5511e-18	4.7368	0.0017485	0.04236
3.3_434.173	-1.6908	7.4477e-17	-6.4189	1.3902e-08	1.517e-06	9.4815		1.32_386.089	0.98482	1.8822	2.17	1.9624	-5.5511e-18	5.3496	0.00026399	0.027673		3.01_508.177	1.2809	2.0566	2.6418	1.5744	1.966e-18	4.7043	0.0021367	0.038388		3.94_646.303	1.5823	1.9823	2.3783	2.1456	3.7007e-18	4.1428	0.0042031	0.04236
2.37_381.048	-1.6889	-3.7875e-18	-6.4072	1.4594e-08	1.517e-06	9.435		1.22_362.056	0.46246	0.41835	-0.10877	-1.7346	2.313e-18	5.2682	0.00030633	0.027673		2.87_452.145	1.2562	1.5745	2.6416	2.0107	4.6953e-17	4.6462	0.0023189	0.038388		3.16_456.184	1.5805	2.153	2.3738	1.7519	-8.6042e-17	3.972	0.0054177	0.04236
3.31_508.103	-1.6883	8.4192e-17	-6.4037	1.4806e-08	1.517e-06	9.4212		1.64_452.128	1.0903	1.9992	2.2297	0.92609	-1.1241e-16	5.2514	0.00031584	0.027673		2.87_428.189	1.4132	1.8677	2.6399	2.1671	6.4208e-16	4.9416	0.001532	0.038388		0.77_94.052	1.498	2.0796	2.3619	1.492	1.1102e-17	3.7607	0.0074225	0.043033
3.3_432.188	-1.6877	4.3484e-17	-6.4004	1.5009e-08	1.517e-06	9.4082		1.21_493.179	0.4564	0.39356	0.15692	-1.7057	1.0177e-17	5.2277	0.00032981	0.027673		2.87_382.184	1.466	1.804	2.6394	2.2229	-1.064e-16	4.9676	0.0014774	0.038388		4.02_498.23	1.1294	1.7735	2.3555	2.4557	6.1294e-17	4.8405	0.0015019	0.04236
2.76_300.098	-1.684	-1.7463e-17	-6.3777	1.6482e-08	1.517e-06	9.3185		3.01_173.105	1.2591	1.9364	2.1538	2.0104	-1.7579e-17	5.1999	0.00034697	0.027673		2.92_490.168	1.4616	1.9948	2.6394	2.0948	-5.0885e-18	4.9176	0.0015844	0.038388		3.68_484.116	1.5118	2.4471	2.3533	2.3399	-3.5157e-17	5.1623	0.00093877	0.04236
2.77_310.127	-1.6835	3.8627e-17	-6.3751	1.6663e-08	1.517e-06	9.3081		1.22_102.032	0.59732	0.62446	0.043582	-1.5615	5.0191e-17	5.1783	0.00036094	0.027673		3.1_425.074	0.82636	1.7636	2.6362	1.7586	1.2027e-16	4.9573	0.001499	0.038388		0.77_139.027	1.3826	2.3551	2.3495	1.399	-1.2814e-16	4.308	0.0032901	0.04236
4.37_484.252	-1.6828	2.3407e-16	-6.3706	1.6977e-08	1.517e-06	9.2902		2.1_506.123	1.2391	1.6829	2.1798	0.45392	4.6259e-17	5.1497	0.00038023	0.027673		2.9_402.152	1.6294	2.1349	2.6357	1.8414	3.3191e-16	4.7815	0.001917	0.038388		1.28_391.096	1.6203	2.4984	2.3438	2.0807	3.1456e-17	4.8324	0.0015197	0.04236
3.31_510.191	-1.6821	1.5959e-17	-6.3664	1.727e-08	1.517e-06	9.2738		2.91_328.08	0.7024	1.5296	2.0035	2.0502	2.391e-17	5.1441	0.00038418	0.027673		2.19_414.173	0.98196	2.0729	2.6255	1.2956	5.5511e-17	4.9926	0.0014268	0.038388		3.74_338.156	0.74269	1.8335	2.3386	2.1812	3.7007e-18	4.7982	0.0015978	0.04236
3.7_410.215	-1.6805	1.2027e-16	-6.357	1.7952e-08	1.517e-06	9.2367		1.22_162.053	0.50838	0.57596	0.023687	-1.6128	-1.9545e-16	5.1319	0.00039278	0.027673		1.72_470.162	1.2089	1.9533	2.6249	1.3881	5.8287e-17	4.5209	0.0027673	0.038388		3.71_482.199	1.489	1.8592	2.3378	1.9359	1.7579e-17	3.681	0.0083606	0.044364
2.37_352.095	-1.6773	-2.313e-17	-6.3378	1.9434e-08	1.517e-06	9.1608		3.7_404.113	1.2385	2.3783	1.7931	1.604	-6.9389e-19	5.1293	0.00039468	0.027673		2.8_433.157	1.3853	2.2083	2.6206	1.7741	-2.9837e-16	4.9101	0.0016011	0.038388		2.91_328.08	0.75029	1.882	2.3333	1.9854	-4.6259e-17	4.4503	0.002666	0.04236
Prodelphinidin trimer 3	-1.6768	2.5385e-17	-6.3352	1.9648e-08	1.517e-06	9.1503		0.63_165.907	1.0443	1.6863	1.6382	2.3622	1.4803e-17	5.125	0.00039775	0.027673		3.93_484.216	1.3064	1.8391	2.6202	1.8311	6.1062e-17	4.4724	0.0029637	0.038388		3.93_580.265	1.3189	1.7636	2.3288	2.0274	-3.9783e-17	3.7456	0.0075915	0.043033
2.6_387.977	-1.6747	3.7759e-17	-6.3229	2.0665e-08	1.517e-06	9.102		1.55_537.12	-0.43109	-0.92297	-0.93688	-2.3513	-4.9266e-17	5.1207	0.00040087	0.027673		2.78_512.131	1.5123	1.796	2.6192	2.3495	7.7716e-17	5.1384	0.0011647	0.038388		Phenol fragment 3	1.3061	1.7816	2.3251	0.84259	1.892e-16	3.551	0.010152	0.047514
4.26_508.211	-1.6743	-8.3267e-18	-6.3204	2.0885e-08	1.517e-06	9.0919		3.68_502.204	1.8328	1.9555	2.0654	2.0183	3.932e-17	5.1122	0.00040715	0.027673		3.06_323.1	1.2492	1.7556	2.6117	2.3345	4.7647e-17	5.2661	0.00097578	0.038388		3.93_580.264	1.6273	1.801	2.3232	2.0048	2.8912e-17	3.6915	0.0082301	0.044248
4.25_554.214	-1.6736	-1.8874e-16	-6.3163	2.1241e-08	1.517e-06	9.0756		1.22_118.063	0.50716	0.56797	0.01512	-1.6121	-9.3675e-17	5.1049	0.00041259	0.027673		2.02_356.113	1.2219	2.1624	2.6104	1.9242	9.4832e-17	5.0627	0.0012941	0.038388		3.53_456.22	2.1868	1.3136	2.3212	1.7248	3.9783e-17	3.9678	0.0054516	0.04236
2.76_208.057	-1.6682	-6.3288e-17	-6.2844	2.4221e-08	1.517e-06	8.95		Deoxyhexopyranose 1	0.23072	-0.057926	-0.031285	-1.9215	-2.4587e-16	5.0915	0.00042277	0.027673		3.98_438.21	1.3491	2.0445	2.6091	1.8151	-3.5041e-17	4.6455	0.002321	0.038388		3.68_162.104	1.4195	2.5106	2.3207	2.2918	4.996e-17	5.2311	0.00084948	0.04236
3.91_392.204	-1.6681	-9.7145e-17	-6.2837	2.4291e-08	1.517e-06	8.9472		1.22_100.052	0.43929	0.41343	-0.067491	-1.7069	1.5867e-16	5.0846	0.00042816	0.027673		3.21_426.207	1.1856	1.7762	2.6066	2.3588	5.8749e-17	5.3989	0.00081233	0.038388		2.15_550.148	2.12	2.282	2.319	1.9006	1.9566e-17	4.4474	0.0026774	0.04236
Epigallocatechin 1	-1.6677	-1.7579e-17	-6.2815	2.4509e-08	1.517e-06	8.9387		1.22_164.058	0.51433	0.59637	-0.013891	-1.5915	-5.4817e-17	5.072	0.00043806	0.027673		2.9_448.157	1.656	2.1921	2.6053	1.7819	3.2289e-16	4.7506	0.0020022	0.038388		3.3_489.164	1.0673	2.1519	2.3065	2.1246	1.1842e-16	4.551	0.0022979	0.04236
1.6_280.116	-1.6677	-2.1626e-17	-6.2815	2.4516e-08	1.517e-06	8.9384		0.59_188.079	-0.71744	-1.5801	-2.1402	-1.8431	-7.7253e-17	5.0636	0.0004448	0.027673		4.59_498.268	1.16	1.9838	2.6012	1.7592	-2.9143e-16	4.6472	0.0023157	0.038388		3.68_206.094	1.4169	2.5	2.294	2.3196	-7.7716e-17	5.2098	0.00087611	0.04236
4.26_578.257	-1.6671	-4.1633e-18	-6.278	2.4872e-08	1.517e-06	8.9246		1.28_391.096	1.3689	1.4445	1.9397	2.318	1.4572e-16	5.0583	0.00044915	0.027673		4.59_488.238	1.2517	2.0207	2.6011	1.8451	7.4015e-18	4.6863	0.0021914	0.038388		3.98_552.202	1.434	1.9207	2.294	2.049	-7.5865e-17	3.7977	0.0070242	0.043033
3.7_576.166	-1.6664	5.528e-17	-6.274	2.5283e-08	1.517e-06	8.9089		0.8_129.043	-0.31725	-0.57007	-1.5747	-2.0718	-1.3508e-16	5.043	0.00046182	0.027673		6.39_530.308	0.82385	0.86194	2.5982	0.93128	-3.6082e-17	4.2252	0.0042102	0.038388		2.11_508.103	1.0545	2.0747	2.2919	1.1742	-2.0585e-16	3.7881	0.0071257	0.043033
2.52_130.063	1.664	-2.5298e-19	6.2596	2.6827e-08	1.5673e-06	8.8522		4.05_566.203	1.1368	1.9138	2.0716	1.9697	-1.2403e-17	5.0114	0.00048916	0.027673		3.94_438.21	1.4965	1.9327	2.598	1.6642	1.5728e-17	4.3183	0.003688	0.038388		2.09_306.971	1.469	2.5525	2.2868	1.6496	-1.0038e-16	4.6371	0.0020246	0.04236
3.7_456.221	-1.6606	-1.9845e-16	-6.2396	2.9125e-08	1.6579e-06	8.7735		3.97_532.214	0.8822	1.9516	1.8151	2.0194	3.7933e-17	5.0102	0.00049026	0.027673		3.7_456.221	1.2758	2.1317	2.595	1.8953	-2.7756e-16	4.8704	0.0016926	0.038388		1.64_452.128	1.6263	2.2931	2.2868	1.2699	1.3878e-16	4.0856	0.0045758	0.04236
3.7_524.208	-1.6577	-6.4763e-18	-6.2231	3.1165e-08	1.669e-06	8.7087		2.24_311.1	1.2317	1.7669	2.0908	2.0791	7.7831e-17	4.9927	0.00050609	0.027673		3.24_386.121	1.4143	2.0537	2.5937	2.1643	-4.6259e-17	4.9859	0.0014402	0.038388		1.42_257.138	1.1548	2.4706	2.2865	1.7374	-2.0169e-16	4.671	0.0019259	0.04236
4.2_342.144	1.6574	1.6283e-16	6.2211	3.142e-08	1.669e-06	8.7009		1.15_224.035	0.24106	1.4671	1.9043	1.6698	1.0079e-16	4.9746	0.000523	0.027673		3.21_472.215	1.3144	1.8056	2.5921	2.3173	-7.6559e-17	5.1243	0.0011879	0.038388		1.46_253.059	0.053341	-0.062217	2.2839	0.68587	7.5865e-17	4.6107	0.0021046	0.04236
Homogentisic acid/Hydroxymethoxybenzoic acid glucoside 3	-1.6569	-3.7933e-17	-6.2183	3.1791e-08	1.669e-06	8.6897		3.68_470.199	0.91865	2.01	2.1327	1.3661	3.1948e-17	4.9609	0.00053622	0.027673		2.79_510.155	1.4959	1.8941	2.59	2.0008	2.7756e-18	4.5223	0.0027617	0.038388		3.68_414.152	1.4003	2.5028	2.2784	2.3363	8.0491e-17	5.2355	0.00084406	0.04236
Prodelphinidin trimer 6	-1.6559	-1.4803e-17	-6.2122	3.2587e-08	1.669e-06	8.666		3.07_472.156	1.2472	1.575	2.1154	2.1049	9.1073e-19	4.938	0.00055894	0.027673		3.31_512.168	1.5426	1.7411	2.5836	2.4372	5.4586e-17	5.2061	0.0010603	0.038388		2.12_143.073	1.0707	2.2642	2.2772	1.5301	4.996e-17	4.1281	0.0042956	0.04236
4.96_512.282	-1.6553	-9.7145e-18	-6.2086	3.3079e-08	1.669e-06	8.6517		1.08_131.094	0.68764	0.64554	-0.14626	-1.4545	2.5443e-17	4.9216	0.00057588	0.027673		4.53_488.238	1.6181	2.3279	2.5817	1.7547	-8.1416e-17	4.9319	0.0015531	0.038388		4.45_389.825	1.109	1.6257	2.2622	2.4382	4.5334e-17	4.5233	0.0023937	0.04236
1.29_280.116	-1.6536	-6.7076e-17	-6.1989	3.442e-08	1.6724e-06	8.6136		4.76_558.267	1.9261	1.8579	1.9943	1.9564	-8.3267e-18	4.9038	0.00059472	0.027673		3.07_404.168	1.2766	1.8256	2.5807	2.2404	7.2164e-17	4.9703	0.0014718	0.038388		2.8_547.15	1.5592	2.2463	2.2611	1.4833	-8.0491e-17	3.8438	0.0065577	0.043033
Prodelphinidin dimer 3	-1.653	-1.1426e-16	-6.1956	3.4892e-08	1.6724e-06	8.6006		2.75_470.008	0.55384	0.88275	1.6387	2.18	3.3769e-16	4.9018	0.00059691	0.027673		3.69_480.175	1.4359	2.0885	2.5799	1.7797	8.2804e-17	4.5489	0.0026599	0.038388		4.14_295.851	1.4843	1.8876	2.2602	2.3856	1.4757e-16	4.2831	0.0034138	0.04236
3.6_320.22	-1.6524	-3.8858e-17	-6.192	3.5406e-08	1.6724e-06	8.5866		1.22_1083.054	0.61482	0.37314	0.2194	-1.5679	-1.9891e-17	4.8978	0.00060126	0.027673		4.67_498.267	1.0736	2.0096	2.5797	1.763	-1.6191e-16	4.7181	0.0020958	0.038388		3.3_473.169	1.5322	2.5334	2.26	2.1998	2.5905e-17	4.9548	0.0012704	0.04236
3.7_526.185	-1.6509	-1.8504e-18	-6.1835	3.6666e-08	1.6905e-06	8.5531		1.4_406.121	1.3015	2.1484	1.9548	0.89396	1.9516e-16	4.8938	0.0006056	0.027673		4.15_518.2	1.4122	1.8167	2.5789	1.9091	-1.8041e-17	4.3444	0.0035538	0.038388		2.1_428.105	1.2296	2.1114	2.2529	0.92234	-1.3323e-16	3.8634	0.0063688	0.043033
4.25_438.246	-1.6502	1.057e-16	-6.1792	3.7312e-08	1.6905e-06	8.5364		3.87_625.163	0.86358	2.1238	0.023101	0.79079	-5.0885e-18	4.8891	0.00061081	0.027673		3.05_462.174	1.6555	2.2631	2.5778	2.1752	4.6768e-16	5.1519	0.0011432	0.038388		2.58_326.158	1.6961	2.3126	2.2366	2.4614	2.2204e-17	4.8789	0.0014196	0.04236
2.6_358.065	-1.6491	1.6191e-17	-6.1729	3.829e-08	1.7001e-06	8.5116		3.89_528.223	1.9005	1.8549	1.9966	1.9266	9.7145e-18	4.8339	0.0006751	0.029974		3.7_410.215	1.2461	2.1455	2.5753	1.8901	-3.3336e-17	4.8566	0.0017256	0.038388		3.68_482.141	1.3546	2.5672	2.2349	2.2867	-2.1279e-17	5.2767	0.00079506	0.04236
1.57_253.058	1.646	5.0885e-18	6.1549	4.1224e-08	1.7008e-06	8.441		3.51_336.178	0.98491	0.53998	1.9594	1.9133	3.3075e-17	4.7951	0.00072426	0.031524		3.26_492.184	1.4655	1.7597	2.5736	2.0784	-4.7069e-17	4.4911	0.0028865	0.038388		3.93_205.955	1.5212	1.8739	2.2323	2.1158	1.6653e-16	3.7153	0.0079423	0.043923
3.16_456.184	1.6454	-7.0545e-18	6.1515	4.1811e-08	1.7008e-06	8.4275		2.05_362.085	1.0424	1.5918	1.9937	2.0816	1.3646e-17	4.7787	0.00074619	0.031524		3.31_396.199	1.065	2.0008	2.5704	2.1641	1.6653e-16	5.248	0.0010005	0.038388		3.59_425.188	0.52772	1.8329	2.2177	2.1753	1.6885e-17	4.9397	0.0012989	0.04236
2.6_420.037	-1.6453	-3.4579e-17	-6.1508	4.1926e-08	1.7008e-06	8.4249		1.22_346.088	0.56737	0.5845	-0.059744	-1.5117	-2.4517e-17	4.7663	0.00076315	0.031524		3.31_508.103	1.3686	1.9139	2.5702	2.1229	-1.5404e-16	4.7201	0.0020897	0.038388		4.12_572.266	1.4718	2.4103	2.2117	2.546	-2.5905e-17	5.3213	0.00074528	0.04236
3.12_340.129	-1.6452	-3.1919e-17	-6.1506	4.1968e-08	1.7008e-06	8.4239		2.13_448.121	0.43908	1.9084	1.333	1.846	6.3375e-17	4.7561	0.00077729	0.031524		2.78_442.168	1.3386	2.2173	2.5692	1.942	-1.7023e-16	4.9365	0.0015431	0.038388		3.58_394.183	1.6525	2.3917	2.2087	2.2351	-2.4864e-17	4.5762	0.0022144	0.04236
2.6_374.037	-1.645	4.1807e-17	-6.1496	4.2136e-08	1.7008e-06	8.4201		0.89_276.094	0.63258	1.6057	1.9876	0.31075	3.1919e-17	4.7533	0.00078119	0.031524		3.52_440.224	1.4995	2.1002	2.5658	1.5956	1.1102e-16	4.437	0.0031163	0.038388		1.49_348.152	1.009	1.7891	2.2038	2.5427	-1.7949e-16	4.9266	0.0013241	0.04236
1.29_326.121	-1.6434	-1.4375e-16	-6.1399	4.3842e-08	1.7138e-06	8.3821		0.51_178.048	0.77978	2.2204	1.3254	0.48354	-1.116e-16	4.7435	0.0007952	0.031524		3.21_540.196	1.2089	1.6583	2.5626	2.3115	1.1565e-17	5.0493	0.0013184	0.038388		Salicylic acid fragment 3	0.88388	1.7036	2.1986	2.0899	2.683e-17	3.8974	0.0060538	0.043033
1.4_143.058	1.6424	-1.7347e-17	6.1342	4.4868e-08	1.7138e-06	8.3599		1.08_438.104	0.86455	0.60133	-0.077683	-1.3195	-7.9479e-17	4.6652	0.00091622	0.035324		3.01_434.214	1.4126	1.8086	2.5612	2.2342	-1.0732e-16	4.7792	0.0019232	0.038388		0.54_107.988	1.1631	1.6071	2.1978	2.3341	9.2519e-18	4.0621	0.0047384	0.04236
4.09_470.236	-1.6413	-3.7007e-18	-6.1283	4.5975e-08	1.7138e-06	8.3366		3.2_222.087	1.1519	1.8684	2.1009	1.7519	-7.1239e-17	4.6612	0.00092287	0.035324		3.31_442.205	1.4236	1.998	2.5586	2.166	-3.2382e-18	4.8102	0.0018414	0.038388		2.9_131.095	1.0922	2.4366	2.1945	1.2971	1.1102e-17	4.3702	0.0030012	0.04236
2.6_618.112	-1.6412	-8.7271e-17	-6.1276	4.6096e-08	1.7138e-06	8.3341		3.93_484.216	1.1652	1.6394	2.2306	1.6892	2.9485e-16	4.6251	0.00098489	0.035494		4.59_566.254	1.057	2.0432	2.5541	1.829	1.2027e-17	4.7731	0.00194	0.038388		4.07_368.147	1.7127	2.677	2.1934	1.9637	1.7579e-17	4.9273	0.0013225	0.04236
4.2_420.161	1.6405	-5.6436e-17	6.1237	4.6848e-08	1.7138e-06	8.3186		2.87_498.144	1.8052	1.6895	2.1197	1.7539	-1.6885e-17	4.6144	0.0010042	0.035494		3.05_416.168	1.7085	2.2696	2.5535	2.2195	-1.3276e-16	5.1531	0.0011412	0.038388		1.25_227.127	1.3552	2.1656	2.1892	2.3576	2.1395e-16	4.4963	0.0024911	0.04236
3.31_512.168	-1.6403	2.8681e-17	-6.1224	4.7091e-08	1.7138e-06	8.3137		2.83_328.08	0.37864	1.2468	1.8992	1.7649	1.0125e-16	4.614	0.001005	0.035494		3.25_442.205	1.6489	2.2423	2.5532	2.0156	2.5535e-16	4.8562	0.0017264	0.038388		3.98_468.22	0.79014	1.7285	2.1869	2.3686	3.4232e-17	4.6917	0.0018681	0.04236
3.25_330.131	-1.6395	2.9606e-17	-6.1178	4.7989e-08	1.7153e-06	8.2956		4.47_570.287	1.1309	1.9903	2.0788	1.44	-6.3607e-18	4.6033	0.0010246	0.035494		1.75_111.032	1.4	1.8356	2.5517	1.5289	1.064e-17	4.0389	0.0054924	0.038856		5.88_397.259	1.0096	0.66912	2.1834	1.9592	-4.6259e-18	3.7169	0.0079234	0.043923
4.26_476.22	-1.6389	7.6328e-17	-6.1143	4.8677e-08	1.7153e-06	8.282		2.65_470.196	0.99	1.6397	1.8714	0.18999	-6.245e-17	4.5842	0.0010604	0.035494		4.37_484.252	1.4586	2.2142	2.5497	1.1751	-1.8504e-18	4.783	0.0019131	0.038388		0.6_182.027	1.4217	2.0539	2.1826	2.1334	1.2999e-16	3.8755	0.0062544	0.043033
3.7_473.209	-1.638	-4.6259e-18	-6.1093	4.9691e-08	1.7236e-06	8.2623		3.94_438.21	1.2836	1.6934	2.2424	1.605	-2.7871e-17	4.5833	0.0010621	0.035494		2.87_548.134	1.5559	1.6723	2.5476	2.515	1.1334e-17	5.2914	0.00094219	0.038388		2.12_446.135	0.56216	2.0472	2.1694	1.3753	-2.0817e-17	4.0355	0.0049293	0.04236
2.8_316.116	-1.6352	1.6653e-17	-6.0935	5.3006e-08	1.8103e-06	8.2005		0.58_189.064	-0.18	1.5757	0.65864	-0.55253	-9.5121e-17	4.5802	0.0010681	0.035494		3.25_456.184	0.87948	1.3987	2.5464	1.6782	2.8681e-17	4.186	0.0044521	0.038544		4.1_546.23	1.4679	2.3035	2.1582	2.5475	-2.4055e-17	5.0441	0.0011153	0.04236
2.77_352.094	-1.633	-4.0014e-17	-6.0805	5.5884e-08	1.8544e-06	8.1499		1.31_172.085	1.0734	1.279	1.7687	2.2194	2.4587e-16	4.5775	0.0010732	0.035494		3.42_340.173	1.0558	1.8654	2.545	1.8833	-1.3878e-17	4.5489	0.0026601	0.038388		2.83_328.08	0.19738	1.6985	2.1526	1.5037	-3.5712e-16	4.2053	0.0038308	0.04236
4.08_418.219	-1.6329	8.4192e-17	-6.0802	5.5966e-08	1.8544e-06	8.1485		3.93_474.187	1.0584	1.9428	2.0695	1.5155	6.3607e-18	4.5727	0.0010826	0.035494		2.05_458.199	1.196	1.5772	2.5448	1.7925	3.0531e-17	4.0717	0.0052411	0.038586		5.46_308.198	1.4868	2.4681	2.1512	1.2489	-3.3769e-17	4.229	0.0036985	0.04236
3.22_162.089	-1.6295	1.4456e-17	-6.0611	6.0499e-08	1.9751e-06	8.074		2.8_547.15	1.3047	1.7631	2.1146	1.8308	-3.7007e-17	4.5704	0.0010872	0.035494		2.87_470.158	1.4878	1.5291	2.5423	2.3923	-5.7362e-17	4.9811	0.0014499	0.038388		6.27_654.396	1.7969	1.8394	2.148	2.2243	1.8504e-17	3.7854	0.0071539	0.043033
4.26_604.197	-1.628	-2.6599e-17	-6.0522	6.2736e-08	2.016e-06	8.0393		0.56_370.111	0.90385	0.037988	-0.08093	-1.4231	-7.4709e-17	4.5537	0.0011204	0.036048		3.1_328.11	1.3845	1.9323	2.5395	2.1312	-5.0885e-17	4.6504	0.0023052	0.038388		3.69_340.152	1.7479	2.1741	2.144	2.4367	-3.7007e-18	4.492	0.0025068	0.04236
2.77_430.073	-1.6269	1.3832e-16	-6.0461	6.4311e-08	2.016e-06	8.0155		1.22_378.024	0.45046	0.3682	-0.024631	-1.6042	9.9457e-18	4.5443	0.0011394	0.036137		1.3_298.124	1.4621	1.8729	2.5394	1.8484	-1.5104e-16	4.1992	0.0043687	0.038544		5.46_290.187	1.5068	2.4637	2.1433	1.1896	5.9212e-17	4.244	0.0036176	0.04236
4.13_494.236	-1.6268	-6.8666e-18	-6.0455	6.4475e-08	2.016e-06	8.0131		1.64_581.195	1.3098	1.8838	2.1147	1.0404	-2.8681e-17	4.5053	0.0012225	0.038223		2.71_308.147	1.4156	1.7169	2.537	1.7003	2.5211e-17	3.9572	0.0061742	0.040055		3.98_422.214	0.81809	1.7827	2.1319	2.2941	1.6191e-17	4.3829	0.0029453	0.04236
4.26_474.223	-1.624	3.5912e-16	-6.03	6.8664e-08	2.099e-06	7.9529		3.24_386.121	1.3795	1.775	2.1372	1.691	-6.6151e-17	4.459	0.0013285	0.040585		3.09_326.156	1.2882	1.9022	2.5348	2.0384	-3.3307e-17	4.5306	0.0027298	0.038388		2.62_322.048	1.7445	2.5952	2.1292	1.7814	1.175e-16	4.5131	0.0024302	0.04236
2.76_409.043	-1.6238	7.2858e-18	-6.0288	6.902e-08	2.099e-06	7.948		1.24_650.101	-0.20836	-1.3926	-1.8269	-1.5134	4.5623e-17	4.4565	0.0013345	0.040585		2.15_550.148	0.71132	1.8632	2.5344	1.3997	5.6899e-17	4.6593	0.0022765	0.038388		3.24_322.162	0.64256	1.5514	2.1279	1.9751	3.7007e-18	3.7481	0.0075637	0.043033
3.95_456.22	-1.6207	3.7933e-17	-6.011	7.4215e-08	2.189e-06	7.8786		3.76_436.053	0.54767	-1.6155	-0.24064	0.14764	-2.7831e-16	4.4443	0.0013642	0.040926		2.87_498.157	1.6045	1.7489	2.5326	2.3931	3.747e-17	4.9373	0.0015413	0.038388		1.72_226.095	1.2951	2.5549	2.127	1.7815	-9.8995e-17	4.5017	0.0024713	0.04236
4.09_468.22	-1.6203	1.9521e-16	-6.0087	7.4899e-08	2.189e-06	7.8698		0.72_225.031	0.49637	1.5517	1.4975	1.9751	-3.3538e-18	4.4149	0.0014383	0.042573		2.24_234.11	1.4371	1.8965	2.5326	2.255	4.8572e-18	4.7881	0.0018995	0.038388		2.15_436.157	1.9091	1.8598	2.1185	0.75404	7.4015e-18	3.7749	0.0072671	0.043033
3.77_366.189	-1.6202	5.3661e-17	-6.0086	7.494e-08	2.189e-06	7.8693		2.72_472.179	1.2968	1.4681	2.1752	1.7689	2.1817e-16	4.4039	0.0014669	0.042849		3.48_466.204	1.4927	2.0909	2.5312	1.8196	1.2027e-17	4.4149	0.0032153	0.038388		2.62_276.055	1.6012	2.697	2.1164	1.8535	1.9452e-16	4.8137	0.0015619	0.04236
3.74_552.27	-1.6191	2.7409e-17	-6.0024	7.6831e-08	2.1963e-06	7.8454		3.2_454.208	1.2585	1.6248	2.1619	1.6913	2.5905e-17	4.3821	0.0015255	0.043322		Homogentisic acid/Hydroxymethoxybenzoic acid glucoside 3	1.803	2.1177	2.5297	1.9253	1.2953e-17	4.5424	0.0026845	0.038388		2.17_311.1	1.2604	1.6875	2.1067	2.4991	1.0177e-16	4.282	0.0034192	0.04236
2.6_390.002	-1.6187	-8.7893e-18	-5.9998	7.7669e-08	2.1963e-06	7.8351		0.63_167.904	0.82221	1.4431	1.5931	2.1395	9.7202e-17	4.3772	0.001539	0.043322		3.36_516.239	1.2189	1.6436	2.5291	1.6431	-3.7007e-17	3.9136	0.0065726	0.040442		2.62_194.105	1.5473	2.7496	2.1035	1.7865	-9.2519e-19	4.9397	0.001299	0.04236
2.77_380.089	-1.6184	-5.6436e-17	-5.9982	7.8157e-08	2.1963e-06	7.8291		2.65_458.198	1.2199	1.8952	1.9574	1.7677	-7.9161e-17	4.3762	0.0015416	0.043322		Coumaric acid glucoside 3 (FA)	1.2541	2.1957	2.5262	2.2894	-1.0547e-16	5.4036	0.00080709	0.038388		3.22_430.147	1.2181	2.3402	2.0973	2.4129	-7.4709e-17	4.9326	0.0013124	0.04236
4.26_501.241	-1.6171	-2.2898e-17	-5.991	8.0508e-08	2.2341e-06	7.8007		3.98_468.22	0.7491	1.7188	1.9177	1.6654	-9.4832e-18	4.3194	0.0017071	0.04684		3.7_526.185	1.4414	2.0965	2.5262	2.085	5.0885e-17	4.7103	0.0021188	0.038388		3.07_472.156	1.2212	1.9944	2.086	2.0357	-1.027e-16	3.5869	0.0096224	0.046519
3.7_498.189	-1.6154	-7.4015e-17	-5.9813	8.3737e-08	2.268e-06	7.7631		2.25_352.136	1.2553	1.9221	2.0067	1.0113	-6.3317e-18	4.3187	0.001709	0.04684		2.23_436.158	1.3495	1.9753	2.5244	1.6089	7.7716e-17	4.1655	0.0045837	0.038544		1.31_172.085	1.0313	1.0545	2.0822	2.4895	4.5334e-17	4.474	0.0025743	0.04236
3.7_446.191	-1.6153	2.0875e-17	-5.9811	8.3804e-08	2.268e-06	7.7624		3.68_282.017	0.040795	-1.8241	-1.2076	-0.45326	9.8532e-17	4.2812	0.0018281	0.049493		3.01_440.189	1.3051	1.6633	2.5219	1.6708	-3.629e-16	3.884	0.006858	0.040897		4.13_714.381	0.8427	2.0978	2.0782	2.2997	1.4803e-17	4.7071	0.0018265	0.04236
4.26_526.22	-1.6148	1.5049e-17	-5.9782	8.4796e-08	2.268e-06	7.7511												2.44_414.173	1.3686	1.8104	2.5216	1.8094	-8.4655e-17	4.0829	0.005158	0.038586		1.32_386.089	1.2825	1.7132	2.0727	2.1786	2.9698e-16	3.4832	0.011235	0.048897
Benzyl salicylate 2	-1.6131	-1.249e-16	-5.9689	8.8046e-08	2.3269e-06	7.7152												2.05_362.085	1.2611	1.5336	2.5207	1.8202	6.4763e-18	3.9715	0.006049	0.039614		3.2_222.087	1.35	2.0942	2.0716	1.9954	2.609e-16	3.5876	0.0096119	0.046519
3.05_479.164	-1.6125	4.2559e-17	-5.9651	8.9415e-08	2.3353e-06	7.7004												2.18_438.136	1.3226	2.0747	2.5206	1.8278	-1.1842e-16	4.4477	0.0030693	0.038388		1.4_406.121	1.4789	2.2787	2.0664	0.89605	-3.0069e-16	3.8859	0.0061586	0.043033
3.98_484.215	1.6112	2.5327e-16	5.9584	9.1907e-08	2.3725e-06	7.6741												3.16_372.106	1.5311	2.2029	2.5204	2.2494	-6.8464e-17	5.0663	0.0012875	0.038388		2.62_238.096	1.5285	2.738	2.0655	1.7376	1.33e-16	4.8355	0.0015129	0.04236
3.7_555.138	-1.61	-6.4994e-17	-5.9513	9.4585e-08	2.4136e-06	7.6467												3.64_546.27	1.1298	2.1134	2.5201	2.0685	-1.4803e-17	5.0005	0.0014111	0.038388		3.06_322.163	0.93257	1.5663	2.0631	2.3926	1.6838e-16	4.1738	0.0040144	0.04236
3.11_358.131	-1.609	1.0362e-16	-5.9456	9.6804e-08	2.4338e-06	7.6245												1.75_273.085	1.4296	1.892	2.5197	1.7171	-3.2382e-17	4.0712	0.0052447	0.038586		3.98_422.215	0.79913	1.6806	2.0589	2.2588	2.0354e-17	4.0807	0.0046093	0.04236
4.67_498.267	-1.6082	4.6259e-17	-5.9412	9.8537e-08	2.4338e-06	7.6075												3.01_394.183	1.3947	1.7006	2.5195	1.71	-1.308e-16	3.9032	0.006671	0.040613		3.93_474.187	1.1849	2.4708	2.0485	1.6905	-3.8858e-17	4.1684	0.0040465	0.04236
2.8_415.033	-1.6081	-1.249e-16	-5.9409	9.8667e-08	2.4338e-06	7.6063												3.99_348.178	1.201	2.0539	2.5185	1.7737	-2.0354e-17	4.4619	0.0030083	0.038388		0.89_276.094	1.0506	1.2488	2.0475	-0.16415	-2.4055e-17	3.8355	0.0066394	0.043033
4.22_584.335	-1.6066	1.0177e-17	-5.9326	1.0206e-07	2.4897e-06	7.574												2.34_456.183	1.0878	1.7609	2.518	1.6216	6.43e-17	4.0593	0.0053344	0.038586		3.76_678.245	0.96014	1.3755	2.0385	2.2536	1.0327e-16	3.6737	0.0084512	0.044364
3.64_546.27	-1.6061	6.2233e-18	-5.9299	1.0318e-07	2.4899e-06	7.5635												1.6_280.116	0.71353	1.8222	2.5148	1.8999	-7.4015e-18	4.995	0.001422	0.038388		2.63_216.148	1.0717	2.3356	2.0384	1.9486	-2.0354e-17	4.1599	0.0040979	0.04236
Prodelphinidin trimer 5	-1.6047	-1.0871e-17	-5.9218	1.0663e-07	2.5396e-06	7.5321												2.87_498.144	1.6586	2.1284	2.5145	2.4414	3.7007e-18	5.277	0.00096115	0.038388		2.15_472.131	0.66992	1.4062	2.0307	-0.042126	2.1464e-16	3.6534	0.0087118	0.044772
2.24_234.11	-1.6037	-5.8518e-17	-5.9164	1.0898e-07	2.5396e-06	7.5112												4.59_490.236	1.177	1.8866	2.5132	1.7849	2.4517e-17	4.2368	0.0041408	0.038388		2.12_156.069	0.26158	1.7841	2.0276	1.1021	1.0732e-16	3.6173	0.0091948	0.045558
2.47_398.079	-1.603	-2.6738e-16	-5.9126	1.1066e-07	2.5396e-06	7.4966												4.59_452.261	1.042	1.871	2.5124	1.6865	7.5403e-17	4.2655	0.0039755	0.038388		4.64_206.094	0.79945	1.9982	2.0268	2.0775	1.8504e-18	4.0328	0.004949	0.04236
Prodelphinidin dimer 7	-1.6022	-8.6555e-17	-5.9085	1.1253e-07	2.5396e-06	7.4806												3.72_468.223	1.1995	2.0731	2.5114	1.6879	2.7756e-18	4.4149	0.0032155	0.038388		1.64_581.195	1.6666	2.012	2.0218	0.73324	1.2721e-16	3.5546	0.010098	0.047514
4.26_568.213	-1.6021	0	-5.9076	1.1293e-07	2.5396e-06	7.4772												3.27_516.242	1.1003	1.9038	2.5086	1.0812	7.5692e-17	4.2271	0.0041986	0.038388		3.44_458.216	0.28476	1.3036	2.0107	1.7317	1.5266e-17	3.5098	0.010797	0.048257
6.08_364.222	1.602	-3.8742e-17	5.9069	1.1323e-07	2.5396e-06	7.4746												2.87_527.105	1.5813	1.5981	2.5082	2.4339	-1.0177e-17	4.9569	0.0014997	0.038388		6.19_652.38	1.4949	2.2043	1.9959	1.9419	-1.8504e-17	3.5689	0.0098846	0.047265
2.6_435.001	-1.602	3.1659e-17	-5.9069	1.1325e-07	2.5396e-06	7.4745												3.65_412.214	1.2271	1.9923	2.5082	1.8978	2.35e-16	4.4322	0.0031375	0.038388		1.59_446.127	1.754	1.8993	1.9881	0.61101	-6.6613e-17	3.5789	0.0097374	0.046765
2.74_196.073	-1.6015	-7.1702e-17	-5.9043	1.1445e-07	2.5409e-06	7.4644												2.62_472.214	1.4713	2.0826	2.5072	1.4648	-1.0004e-16	4.2341	0.0041569	0.038388		5.57_308.198	1.1564	2.2548	1.9834	1.0982	-7.4015e-18	3.4984	0.010984	0.048541
4.78_512.282	-1.5986	-3.2844e-17	-5.8883	1.2211e-07	2.684e-06	7.4025												0.77_270.078	1.5436	1.8848	2.5057	1.4481	1.6006e-16	3.9503	0.0062353	0.04009		3.07_404.168	1.3522	1.9976	1.9647	2.2281	9.0206e-18	3.6771	0.0084095	0.044364
4.59_566.254	-1.598	4.6259e-17	-5.885	1.2375e-07	2.6933e-06	7.3897												3.32_476.189	1.7431	2.0822	2.5033	2.1595	-4.4872e-16	4.6701	0.0022422	0.038388		2_629.198	0.86479	2.2898	1.9624	1.9879	-2.2019e-16	4.2675	0.0034935	0.04236
Prodelphinidin trimer 4	-1.5975	1.5751e-16	-5.8825	1.2499e-07	2.694e-06	7.3802												3.44_486.23	0.92204	1.8926	2.5022	2.0338	-1.1102e-17	4.8707	0.0016917	0.038388		1.74_202.132	1.3655	2.5917	1.9427	1.5755	5.0191e-17	4.2166	0.0037672	0.04236
3.32_493.179	-1.5968	-5.9212e-17	-5.8786	1.27e-07	2.711e-06	7.3649												1.64_581.195	1.2355	2.069	2.5022	1.4296	-3.1919e-17	4.2834	0.0038752	0.038388		3.1_474.172	2.0556	0.32251	1.9427	0.78514	-2.6946e-17	4.002	0.0051815	0.04236
3.51_488.188	-1.5929	-8.4192e-17	-5.8573	1.3842e-07	2.9153e-06	7.2827												3.93_340.101	1.1	1.3302	2.501	0.96881	-1.4248e-16	3.666	0.0093832	0.046687		Phenylalanine	1.9013	2.0288	1.9405	0.42232	-8.6967e-17	4.3469	0.003106	0.04236
0.55_145.038	1.5927	-4.1633e-17	5.8559	1.392e-07	2.9153e-06	7.2773												4.2_498.23	1.1602	1.697	2.5002	1.8466	-8.8355e-17	4.0893	0.0051109	0.038583		0.63_163.91	1.561	2.3452	1.9403	2.5886	-2.313e-17	4.949	0.0012813	0.04236
3.69_480.175	-1.5897	-8.7893e-17	-5.8398	1.4856e-07	3.0674e-06	7.2151												2.15_436.157	0.96031	1.9413	2.498	1.6349	-4.1633e-17	4.3846	0.0033566	0.038388		3.28_612.248	0.93522	1.4822	1.9175	2.2741	1.2583e-16	3.5696	0.0098744	0.047265
1.83_426.04	-1.5889	3.7239e-17	-5.835	1.5146e-07	3.0674e-06	7.1966												4.02_500.244	1.5325	1.9351	2.4976	1.6679	1.0825e-16	4.0209	0.0056361	0.039002		1.59_281.049	1.9792	1.6496	1.9087	0.40313	5.5511e-17	3.8389	0.0066055	0.043033
3.88_470.235	-1.5887	-5.5511e-18	-5.8344	1.5184e-07	3.0674e-06	7.1942												2.39_452.153	1.2674	2.2049	2.4967	2.0982	1.6561e-16	4.9733	0.0014658	0.038388		2.82_425.981	0.73673	1.0162	1.9053	2.6286	1.3415e-16	5.0057	0.0011795	0.04236
3.35_308.146	-1.5884	9.2287e-17	-5.8325	1.5301e-07	3.0674e-06	7.1869												Isopropylmalate-like 3	1.3298	2.1677	2.4962	2.0227	-5.4586e-17	4.7364	0.0020424	0.038388		Indole-3-acetic acid	2.2424	1.8197	1.9031	1.6652	-1.4433e-16	3.4457	0.011884	0.049786
4.16_462.205	-1.5883	-5.6436e-17	-5.8319	1.5337e-07	3.0674e-06	7.1847												3.56_562.261	1.3455	2.2386	2.4953	1.8286	1.064e-17	4.6553	0.0022893	0.038388		2.05_362.085	1.0457	1.962	1.8984	2.7385	-1.1102e-17	5.2272	0.00085429	0.04236
4.25_523.26	-1.5859	-4.8572e-17	-5.8189	1.6163e-07	3.2011e-06	7.1346												2.87_482.106	1.1142	1.4522	2.4941	2.1807	4.5797e-17	4.5855	0.0025259	0.038388		0.63_165.907	1.6387	2.4659	1.8921	2.541	1.4803e-17	5.0264	0.0011444	0.04236
2.6_502.036	-1.5855	7.3437e-17	-5.8169	1.6294e-07	3.2011e-06	7.1268												4.53_498.267	0.76649	1.6934	2.4935	1.3509	3.5712e-16	4.1499	0.0046873	0.038544		3.7_404.113	1.3369	2.5567	1.8892	1.7758	8.3267e-17	4.1592	0.0041023	0.04236
3.2_173.105	-1.5851	-7.4015e-18	-5.8144	1.6457e-07	3.2048e-06	7.1173												3.55_334.198	1.3208	1.8387	2.4933	2.0105	-5.5511e-17	4.2828	0.0038787	0.038388		2.88_383.122	1.5038	2.0442	1.8786	2.2488	1.1889e-16	3.6489	0.0087705	0.044772
4.74_524.246	-1.5843	-1.0755e-17	-5.8105	1.6723e-07	3.2282e-06	7.102												2.39_406.147	1.2388	2.1064	2.4927	2.1431	-1.9429e-17	4.8954	0.0016343	0.038388		2.48_349.137	1.4381	2.0377	1.8147	2.1748	3.7007e-18	3.4554	0.011714	0.049545
2.9_438.129	-1.5835	9.6913e-17	-5.8057	1.705e-07	3.2629e-06	7.0835												2.9_516.147	1.6575	1.946	2.4921	2.1946	-2.9606e-17	4.5491	0.0026592	0.038388		1.59_311.009	1.9154	1.6648	1.8108	0.40672	-2.3962e-16	3.5404	0.010314	0.047818
3.31_396.199	-1.5827	-6.06e-17	-5.8013	1.7351e-07	3.276e-06	7.0668												1.93_497.155	1.056	1.5194	2.4916	2.1589	-4.8572e-17	4.6019	0.0024682	0.038388		3.55_386.157	1.7697	2.1914	1.8087	2.5777	4.915e-18	4.5732	0.0022241	0.04236
Prodelphinidin dimer 1	-1.5825	2.3592e-17	-5.8004	1.7413e-07	3.276e-06	7.0634												3.61_406.182	0.51458	0.99279	2.4878	1.427	1.064e-17	4.2193	0.0042458	0.038388		0.77_164.032	0.99798	2.4699	1.8004	1.9909	8.1416e-17	4.358	0.0030555	0.04236
3.2_452.187	-1.5816	2.7524e-17	-5.7956	1.7751e-07	3.3024e-06	7.045												3.31_541.122	1.493	1.3092	2.487	2.5454	7.4015e-18	5.3667	0.0008492	0.038388		0.63_167.904	1.137	2.3271	1.7803	2.4226	-1.3774e-16	4.6829	0.0018925	0.04236
4.08_464.225	-1.5814	-2.0817e-18	-5.7943	1.7851e-07	3.3024e-06	7.0396												3.88_470.235	1.2112	2.2373	2.4831	1.4827	-1.4155e-16	4.5902	0.0025095	0.038388		2.75_470.008	0.5535	1.072	1.761	2.2945	-1.5219e-16	3.8129	0.0068668	0.043033
2.6_452.053	-1.5807	-6.9389e-18	-5.7906	1.8118e-07	3.3146e-06	7.0254												2.82_466.167	1.7372	2.094	2.4822	2.0345	4.7184e-17	4.4735	0.0029591	0.038388		1.85_117.079	0.6491	2.0381	1.7569	0.37791	-2.6275e-16	3.5304	0.01047	0.047855
Catechin(-)	-1.5804	5.9212e-17	-5.7892	1.8216e-07	3.3146e-06	7.0203												3.47_368.203	1.0501	1.0249	2.4817	1.54	1.8504e-18	3.7203	0.0086777	0.045702		3.44_526.197	-0.1239	1.1428	1.7539	1.6162	1.2074e-16	3.5337	0.010418	0.047818
3.99_348.178	-1.5793	-3.2382e-18	-5.7829	1.8682e-07	3.372e-06	6.9961												4.02_498.23	1.0474	1.7095	2.4806	2.1298	0	4.6073	0.0024494	0.038388		1.59_295.038	1.9853	1.564	1.7387	0.14078	5.9212e-17	4.0433	0.0048727	0.04236
2.86_472.158	-1.5785	-7.9566e-17	-5.779	1.8981e-07	3.3982e-06	6.981												3.98_458.193	0.74204	1.3148	2.4805	1.7619	-2.424e-16	4.2262	0.0042038	0.038388		1.81_227.043	0.68184	1.3109	1.7276	2.4246	1.9293e-16	3.9864	0.0053025	0.04236
0.54_605.076	1.578	-4.0708e-17	5.7761	1.9206e-07	3.411e-06	6.9697												3.7_498.189	1.3533	1.9783	2.4804	2.1676	-2.8681e-17	4.6192	0.0024088	0.038388		3.65_551.876	0.51524	1.0045	1.7203	2.5997	-2.5905e-17	4.9487	0.0012819	0.04236
3.57_442.205	-1.5765	3.5157e-17	-5.7679	1.9851e-07	3.4948e-06	6.9382												2.37_352.095	1.3887	1.8684	2.479	1.8666	2.2869e-17	4.0625	0.0053106	0.038586		2.24_311.1	0.96739	1.4351	1.712	2.4022	3.1456e-17	3.595	0.0095059	0.046412
6.08_294.219	1.5757	-1.2536e-16	5.7638	2.0181e-07	3.4948e-06	6.9224												2.17_311.1	1.601	2.026	2.4787	1.8884	-3.7933e-17	4.2207	0.0042371	0.038388		2.12_322.08	1.4647	2.544	1.6998	1.2644	1.9111e-17	3.8325	0.0066691	0.043033
3.64_354.188	-1.5746	1.3693e-16	-5.758	2.0654e-07	3.4948e-06	6.9003												3.7_524.208	1.3983	2.0665	2.4785	2.1226	-4.9035e-17	4.6206	0.002404	0.038388		3.45_459.156	1.0962	1.9867	1.6815	-0.12811	-1.8504e-18	4.2613	0.0035257	0.04236
1.73_459.003	-1.5746	-9.1593e-17	-5.758	2.0658e-07	3.4948e-06	6.9001												2.87_496.176	1.5517	1.7532	2.4781	2.3212	1.892e-16	4.6398	0.0023399	0.038388		1.31_380.067	0.093578	0.089337	1.6769	1.8234	4.4872e-16	3.9127	0.0059178	0.043033
1.65_236.035	-1.5743	1.3117e-16	-5.7562	2.0808e-07	3.4948e-06	6.8932												3.2_222.087	1.1024	2.0031	2.476	1.8415	-5.5511e-17	4.4184	0.0031995	0.038388		1.52_326.119	1.5891	2.322	1.6596	0.76987	-1.2953e-17	3.6215	0.0091367	0.045558
3.28_480.09	-1.5743	-4.996e-17	-5.756	2.0822e-07	3.4948e-06	6.8926												3.32_380.168	1.4468	2.0192	2.4681	2.02	2.8681e-17	4.3574	0.0034887	0.038388		4.11_352.077	1.6568	2.7065	1.6511	1.0079	1.0362e-16	4.6245	0.0020622	0.04236
3.7_510.139	-1.5739	5.3198e-18	-5.7539	2.1e-07	3.4948e-06	6.8844												4.44_514.262	1.3256	1.9896	2.4675	1.9137	-1.8504e-17	4.2544	0.0040386	0.038388		0.75_210.02	0.0034048	1.1217	1.6404	2.0499	-2.7756e-17	4.0124	0.0051019	0.04236
1.19_326.121	-1.5738	-4.6259e-17	-5.7536	2.1024e-07	3.4948e-06	6.8833												4.96_512.282	1.0188	2.0392	2.4674	1.6702	-6.7539e-17	4.4021	0.0032742	0.038388		Indole-3-acetonitrile	-0.035886	1.8707	1.6038	0.74169	1.7868e-16	3.496	0.011023	0.048541
3.85_368.204	-1.5737	-7.8178e-17	-5.7528	2.1095e-07	3.4948e-06	6.8801												2.78_340.101	1.068	1.8518	2.465	1.868	1.1264e-16	4.2474	0.004079	0.038388		1.74_238.051	1.4032	1.9399	1.5944	2.5767	5.3661e-17	4.1605	0.004094	0.04236
2.6_481.007	-1.5727	1.3756e-16	-5.7474	2.1552e-07	3.5441e-06	6.8597												3.32_430.183	1.7647	2.041	2.4627	2.2092	-5.181e-17	4.6039	0.0024612	0.038388		3.16_372.106	1.9241	1.6548	1.5758	2.6019	-4.6809e-17	4.2153	0.0037744	0.04236
3.88_436.23	-1.5717	9.8995e-17	-5.7423	2.2003e-07	3.5798e-06	6.8399												2.23_482.163	1.2055	2.0145	2.46	1.6389	1.6006e-16	4.131	0.0048154	0.038544		1.28_290.11	1.5461	1.1038	1.5549	-0.45303	9.6219e-17	3.8803	0.0062107	0.043033
1.3_298.124	-1.5715	2.6281e-17	-5.7413	2.2091e-07	3.5798e-06	6.8361												2.23_550.149	1.0605	2.0695	2.4594	1.3456	-5.181e-17	4.2965	0.0038041	0.038388		1.92_400.16	0.10281	0.62935	1.5512	2.1169	2.683e-17	3.8871	0.0061476	0.043033
0.76_363.058	1.5711	-8.0491e-17	5.7392	2.2276e-07	3.5836e-06	6.8281												4.47_570.287	1.2012	2.3778	2.4545	1.4057	-3.7007e-18	4.88	0.0016698	0.038388		4.11_302.095	1.6048	2.6596	1.5497	0.77061	-8.9049e-18	4.6576	0.0019643	0.04236
2.9_402.152	-1.5703	7.4015e-18	-5.7345	2.2703e-07	3.6242e-06	6.81												2.87_512.148	1.2066	1.8243	2.4528	2.1533	-2.2725e-17	4.4832	0.0029187	0.038388		0.72_225.031	0.040454	1.5153	1.5261	2.0263	1.8966e-17	4.013	0.0050969	0.04236
2.9_448.157	-1.57	-2.2528e-16	-5.7328	2.2855e-07	3.6242e-06	6.8036												2.58_368.168	1.1817	1.3681	2.4527	1.6449	-1.7116e-17	3.5836	0.010567	0.048428		3.6_508.18	0.17844	2.0726	1.5035	1.5546	6.2913e-17	3.814	0.0068551	0.043033
6.3_562.335	-1.5689	3.0242e-17	-5.727	2.3394e-07	3.6696e-06	6.7814												3.07_428.188	1.2573	2.1496	2.4521	2.2262	3.7007e-17	4.9863	0.0014394	0.038388		0.55_145.038	1.9689	2.0267	1.5017	0.1061	7.309e-17	4.6552	0.0019713	0.04236
1.94_478.116	-1.5687	-4.7416e-17	-5.7262	2.3472e-07	3.6696e-06	6.7782												1.46_488.173	1.0493	1.6516	2.4504	1.3116	5.2736e-17	3.6504	0.0095965	0.046796		3.51_336.178	0.46444	-0.17898	1.4906	2.1146	-5.9674e-17	4.573	0.0022249	0.04236
4.6_508.251	-1.5683	1.4109e-16	-5.7237	2.3703e-07	3.6798e-06	6.7688												2.87_418.157	1.2794	2.0078	2.4496	1.8506	7.2164e-17	4.1954	0.0043924	0.038544		Arbutin/hydroquinone glucoside (FA)	0.38022	1.1059	1.4521	2.2273	7.4015e-17	3.4597	0.011638	0.04949
2.61_288.064	-1.5663	-1.2172e-17	-5.7133	2.4712e-07	3.7924e-06	6.729												4.67_488.238	0.86065	1.9772	2.4494	1.5736	-3.9783e-17	4.3916	0.0033234	0.038388		Hydroxytryptophan	1.2523	2.4746	1.4475	0.48479	-3.1086e-16	4.1546	0.0041301	0.04236
Salicylic acid fr 2	-1.5659	-1.7405e-16	-5.7111	2.4931e-07	3.7924e-06	6.7206												2.87_420.158	1.3115	1.955	2.4483	1.8633	3.2382e-17	4.1116	0.0049505	0.038544		3.98_458.193	-0.32596	1.1521	1.4401	1.6561	-1.6885e-16	3.5551	0.01009	0.047514
1.53_348.106	-1.5659	8.3267e-18	-5.711	2.4941e-07	3.7924e-06	6.7202												1.55_351.099	1.9125	1.7578	2.4483	1.8912	-2.1279e-17	4.0597	0.0053313	0.038586		3.97_532.214	0.82342	2.3147	1.4398	1.9887	-1.4803e-17	3.9117	0.0059261	0.043033
3.48_585.205	-1.5651	2.6553e-16	-5.7068	2.5368e-07	3.831e-06	6.704												4.1_546.23	1.3117	2.3394	2.4468	2.3606	0	5.553	0.00065722	0.038388		1.21_417.011	0.2492	0.76687	1.4396	2.3515	8.4192e-17	4.1735	0.004016	0.04236
1.65_288.085	-1.5648	9.6393e-17	-5.705	2.5551e-07	3.8327e-06	6.6971												3.07_472.156	1.4479	1.5492	2.4467	2.4591	9.0668e-17	4.8954	0.0016343	0.038388		2.52_130.063	2.3177	2.2342	1.4165	0.59272	-1.5034e-17	4.8598	0.00146	0.04236
3.05_452.144	-1.5642	-7.4246e-17	-5.7023	2.5834e-07	3.8407e-06	6.6866												3.84_480.22	1.2923	2.3062	2.4465	1.9111	-2.7756e-17	4.7818	0.0019164	0.038388		2.13_448.121	0.1136	1.5892	1.3477	1.921	1.9429e-17	3.4615	0.011607	0.049455
1.92_346.125	-1.5636	-9.2519e-18	-5.6991	2.6168e-07	3.8407e-06	6.6743												3.58_394.183	0.84605	2.0242	2.4451	1.876	7.494e-17	4.7845	0.001909	0.038388		1.68_347.12	0.87177	1.9567	1.3423	2.3018	-5.3661e-17	3.7368	0.0076923	0.043033
3.86_468.22	-1.5636	3.6545e-17	-5.6987	2.6203e-07	3.8407e-06	6.673												2.16_294.131	0.62372	0.59871	2.4413	1.6818	-4.1518e-17	4.5576	0.0026276	0.038388		4.33_328.225	1.3851	2.1908	1.3405	-0.0059	-4.9035e-17	4.2599	0.0035333	0.04236
4.59_452.261	-1.5633	3.8627e-17	-5.697	2.6386e-07	3.8407e-06	6.6664												3.7_446.191	1.2511	2.2057	2.4408	1.7727	4.9035e-17	4.4703	0.0029725	0.038388		1.57_352.137	2.5108	1.5225	1.3331	1.7666	-1.8272e-16	3.7828	0.0071822	0.043033
0.73_327.948	-1.5631	5.4586e-17	-5.6962	2.647e-07	3.8407e-06	6.6634												3.98_552.202	1.1016	1.9878	2.4383	1.2789	-2.313e-18	4.0491	0.0054133	0.038618		Coumaric acid glucoside 3 (FA)	1.2614	1.9501	1.2928	2.3204	1.064e-16	3.5041	0.01089	0.048472
1.72_408.076	-1.5601	3.2382e-17	-5.6801	2.8232e-07	3.9911e-06	6.6019												2.15_482.163	0.95537	2.0071	2.4373	1.4782	2.572e-16	4.2334	0.0041613	0.038388		2.57_296.053	0.14993	1.7381	1.2715	1.929	1.1056e-16	3.594	0.0095209	0.046412
2.9_422.178	-1.56	6.4763e-18	-5.6798	2.827e-07	3.9911e-06	6.6006												2.24_311.1	1.4692	2.0686	2.4366	1.8475	-9.0668e-17	4.1541	0.0046591	0.038544		0.55_102.032	1.8846	2.4379	1.2616	0.99508	3.6082e-17	3.8846	0.006171	0.043033
0.88_331.054	-1.5597	-7.2858e-17	-5.678	2.8467e-07	3.9911e-06	6.5939												1.49_540.168	1.5605	1.9056	2.4365	2.2072	-1.9614e-16	4.4058	0.003257	0.038388		3.67_437.132	1.4304	1.1774	1.2561	2.5248	-5.1463e-17	3.619	0.0091713	0.045558
4.59_498.268	-1.5596	2.4517e-16	-5.6776	2.8519e-07	3.9911e-06	6.5922												2.4_412.996	1.0994	1.762	2.4364	2.2574	-5.5511e-17	4.7236	0.0020794	0.038388		1.86_513.184	-0.067199	0.10179	1.2445	2.0985	1.2733e-16	4.2505	0.0035829	0.04236
4.22_710.398	-1.5596	3.8858e-17	-5.6774	2.8535e-07	3.9911e-06	6.5917												3.95_550.212	0.83124	2.1055	2.4355	1.9453	6.2913e-17	5.0411	0.0013335	0.038388		3.77_430.183	0.94504	2.247	1.2279	1.9168	-1.0686e-16	3.4502	0.011804	0.049786
1.29_266.1	-1.5595	1.064e-17	-5.677	2.8585e-07	3.9911e-06	6.59												3.97_532.214	1.0966	2.0812	2.4339	2.4375	2.9606e-17	5.5497	0.00066017	0.038388		3.05_514.142	2.3708	1.3364	1.1349	0.57105	-2.195e-16	3.5383	0.010347	0.047818
3.53_368.204	-1.5586	-1.0177e-17	-5.6725	2.9109e-07	4.0388e-06	6.5726												3.63_562.259	0.93385	2.018	2.4334	1.561	-1.8296e-16	4.3031	0.0037682	0.038388		4.06_316.074	1.8908	2.185	1.1173	0.11771	2.2204e-17	4.6549	0.0019722	0.04236
1.89_398.082	-1.5553	1.3184e-16	-5.6546	3.1265e-07	4.311e-06	6.5044												3.29_432.192	1.3185	2.0818	2.4322	1.9297	1.7671e-16	4.3165	0.0036973	0.038388		2.24_234.11	1.985	1.3706	1.07	-0.24252	-1.8134e-16	4.0252	0.0050055	0.04236
3.47_368.203	-1.5547	-8.3267e-18	-5.6513	3.1675e-07	4.3407e-06	6.492												4.01_474.187	1.1931	1.9518	2.4319	1.5367	-4.5334e-17	3.9171	0.00654	0.040442		0.51_178.048	1.0139	2.5308	1.0699	0.71248	4.3526e-16	3.8711	0.0062959	0.043033
1.83_296.066	-1.5521	5.0885e-17	-5.638	3.3414e-07	4.5508e-06	6.441												4.11_468.22	1.4903	2.2806	2.4307	1.739	-1.4294e-16	4.4406	0.0031005	0.038388		2.59_412.133	1.7496	1.8943	1.0386	0.035495	-3.6938e-16	3.6936	0.008205	0.044248
2.02_356.113	-1.5516	-1.2953e-17	-5.6354	3.3752e-07	4.5689e-06	6.4314												1.86_513.184	1.0386	1.9591	2.43	2.0605	-1.3993e-16	4.6059	0.0024545	0.038388		1.16_245.138	1.0389	1.846	1.0385	-0.38807	-4.1541e-16	3.6122	0.0092654	0.045804
1.22_282.095	-1.5503	-2.7756e-18	-5.6283	3.4726e-07	4.6722e-06	6.4042												3.31_510.191	0.91765	1.8123	2.4291	2.0069	7.0314e-17	4.502	0.0028421	0.038388		4.06_156.115	1.8691	2.0951	1.0346	-0.031122	-4.4409e-17	4.7248	0.0017797	0.04236
3.25_432.176	-1.5496	2.0672e-17	-5.6248	3.5211e-07	4.709e-06	6.391												1.58_430.168	0.97504	1.5629	2.4272	1.6153	-9.2519e-18	3.6973	0.0089693	0.046151		4.98_254.152	1.5574	-0.27271	1.0131	-0.69918	-1.064e-17	3.9991	0.0052035	0.04236
Phenylalanine	1.5492	-2.1279e-17	5.6223	3.5564e-07	4.7277e-06	6.3814												4.78_512.282	0.997	1.9908	2.4268	0.81734	1.2186e-16	4.4456	0.0030783	0.038388		4.06_366.056	1.7433	2.0515	1.009	-0.1281	5.5511e-17	4.5675	0.002243	0.04236
2.6_406.048	-1.5481	3.648e-17	-5.617	3.6332e-07	4.801e-06	6.3611												3.93_474.187	1.1201	1.8506	2.4261	1.6212	-3.0531e-17	3.8527	0.007173	0.041712		4.06_284.057	1.8762	1.9087	0.97384	-0.19852	2.4055e-17	4.6855	0.0018855	0.04236
1.68_410.051	-1.5474	-6.43e-17	-5.6131	3.6906e-07	4.8119e-06	6.3461												3.86_468.22	1.281	2.2736	2.4247	1.6118	1.929e-16	4.4684	0.0029805	0.038388		4.06_200.105	1.7992	2.0372	0.97304	-0.13664	1.2212e-16	4.6769	0.0019094	0.04236
4.11_274.214	-1.5473	-7.4709e-17	-5.6125	3.6986e-07	4.8119e-06	6.344												3.32_528.161	1.3357	1.935	2.4245	1.8136	1.9371e-17	3.9615	0.006136	0.040019		6.31_378.169	-0.33046	-1.492	0.9651	0.11814	3.481e-17	3.5529	0.010124	0.047514
3.09_326.156	-1.5472	-1.6538e-17	-5.612	3.7064e-07	4.8119e-06	6.342												2.76_428.189	0.9048	1.9394	2.4182	1.6522	2.1279e-17	4.2181	0.0042531	0.038388		3.37_218.115	1.4188	1.7809	0.92795	-0.26944	1.1241e-16	3.513	0.010746	0.048125
3.12_538.203	-1.5465	2.4517e-16	-5.6086	3.7566e-07	4.8486e-06	6.3292												4.53_452.262	1.2973	2.0515	2.4161	1.73	-4.7184e-17	4.0604	0.0053264	0.038586		2.87_480.157	1.5682	1.0833	0.85513	-0.69499	1.5913e-16	3.6779	0.0083984	0.044364
2.81_388.136	-1.5459	-2.1279e-17	-5.6054	3.8056e-07	4.8835e-06	6.3168												3.7_576.166	1.5129	2.0997	2.4155	2.4006	6.5688e-17	4.971	0.0014705	0.038388		4.29_428.168	1.9918	2.321	0.85014	1.8416	-2.4055e-17	4.2088	0.0038113	0.04236
0.73_311.977	-1.5449	5.8981e-17	-5.6	3.8885e-07	4.9612e-06	6.2963												1.55_310.126	1.514	1.7576	2.4129	1.6347	4.9497e-17	3.5971	0.010364	0.048244		3.67_505.12	1.4701	0.65589	0.83806	2.3456	-2.3916e-16	3.5339	0.010416	0.047818
3.05_462.174	-1.5446	3.6452e-16	-5.5984	3.9124e-07	4.9632e-06	6.2904												2.39_522.116	1.2627	1.9886	2.4126	2.2495	1.2953e-17	4.6874	0.0021881	0.038388		6.08_412.203	1.401	1.5297	0.83556	-0.51049	1.4017e-16	3.5136	0.010736	0.048125
2.87_482.106	-1.5442	-1.1033e-16	-5.5962	3.9473e-07	4.979e-06	6.2819												4.53_566.254	1.18	1.7987	2.4099	1.4763	-6.4763e-17	3.6358	0.0098008	0.047208		0.51_382.095	0.6731	-0.73599	0.80832	1.6151	-5.5511e-18	3.5143	0.010725	0.048125
4.59_488.238	-1.5434	9.2519e-18	-5.5924	4.0079e-07	5.0269e-06	6.2674												3.94_646.303	1.0616	1.9235	2.4075	2.1702	9.2519e-18	4.6687	0.0022464	0.038388		2.9_516.147	1.4854	1.4316	0.79846	-0.58219	6.8464e-17	3.682	0.0083478	0.044364
4.44_338.198	-1.543	-1.2259e-17	-5.5898	4.0494e-07	5.0504e-06	6.2576												2.65_458.198	1.2778	1.9026	2.4074	2.0763	1.3045e-16	4.2426	0.0041072	0.038388		4.98_210.162	1.5855	-0.41063	0.79532	-0.71636	-1.9429e-17	4.0128	0.0050986	0.04236
Prodelphinidin trimer 2	-1.5426	4.7184e-17	-5.5881	4.0759e-07	5.0551e-06	6.2513												2.69_414.173	1.4881	1.7395	2.4043	2.0903	1.2837e-17	4.0262	0.0055934	0.038869		trans-Zeatin	1.9882	2.2232	0.77396	1.0436	3.5897e-16	3.7422	0.0076297	0.043033
1.36_359.089	1.5417	-9.2519e-19	5.5833	4.156e-07	5.1051e-06	6.2328												3.2_452.187	1.3881	2.2846	2.4029	1.5852	2.7062e-17	4.3673	0.0034397	0.038388		2.73_418.147	0.97444	2.4264	0.76935	0.94188	9.2519e-19	3.4453	0.011891	0.049786
Prodelphinidin dimer 4	-1.5416	1.3323e-16	-5.5829	4.1622e-07	5.1051e-06	6.2313												4.19_482.236	1.585	2.2344	2.4023	2.0539	1.6838e-16	4.5212	0.002766	0.038388		5.12_380.216	1.5696	1.6407	0.73581	-0.45614	1.8504e-17	3.9514	0.0055861	0.042596
1.58_307.128	-1.5412	-2.7062e-17	-5.5807	4.1981e-07	5.1207e-06	6.2232												3.94_552.202	1.2625	1.9213	2.4018	1.6301	5.5511e-18	3.7883	0.007868	0.043523		4.29_220.11	1.9852	2.2401	0.72216	1.6943	9.2519e-19	4.0331	0.0049471	0.04236
3.31_442.205	-1.5408	4.6259e-17	-5.5786	4.2341e-07	5.1364e-06	6.215												2.88_466.167	1.4758	1.746	2.4013	2.0803	0	4.009	0.0057327	0.039202		4.3_496.155	1.9525	2.2256	0.7024	1.6909	-3.7007e-18	3.9684	0.0054468	0.04236
2.6_222.089	-1.5401	8.4423e-17	-5.5749	4.2963e-07	5.1836e-06	6.2011												2.46_470.199	1.129	1.9213	2.4013	1.2572	-3.0069e-17	3.8072	0.0076575	0.043198		2.87_548.134	1.9041	0.63203	0.68508	-0.43691	-1.6098e-16	3.5046	0.010882	0.048472
Homogentisic acid/Hydroxymethoxybenzoic acid glucoside 2 (FA)	-1.5395	9.5294e-17	-5.5717	4.3515e-07	5.1894e-06	6.1889												2.53_356.167	1.1936	1.7957	2.401	1.8892	-2.1279e-17	3.9123	0.0065845	0.040442		3.21_426.207	1.5251	0.8351	0.67159	-0.82272	-2.6021e-16	3.5579	0.010048	0.047514
Benzyl-HCH fr	-1.5391	-6.8464e-17	-5.5699	4.3827e-07	5.1894e-06	6.1821												2.77_352.094	1.6812	2.0655	2.3982	1.6171	1.1195e-16	3.9474	0.0062616	0.04009		1.81_289.075	2.0489	2.0131	0.6593	0.76981	9.2519e-17	3.6533	0.0087135	0.044772
Catechol/Hydroquinone 1	-1.539	-5.4355e-17	-5.569	4.3981e-07	5.1894e-06	6.1787												3.05_532.137	1.8895	1.8446	2.3975	2.5315	7.4477e-17	5.0232	0.0013672	0.038388		0.98_152.033	1.5795	1.3835	0.65724	-0.63968	-1.6653e-17	3.9574	0.0055365	0.042395
Tremuloidin 2	-1.5389	-1.7255e-16	-5.5688	4.4023e-07	5.1894e-06	6.1778												2.99_492.182	1.3776	1.9764	2.3975	2.0209	-1.7208e-16	4.1575	0.0046364	0.038544		Succinic acid	2.3605	1.6442	0.6552	0.45125	-2.9976e-16	4.2474	0.0035994	0.04236
Salirepin 2	-1.5387	4.597e-17	-5.5673	4.428e-07	5.1894e-06	6.1723												1.72_424.157	1.2163	1.9382	2.3974	1.7215	-3.932e-16	3.8862	0.0068358	0.040897		1.43_266.1	2.4346	1.8396	0.63936	0.67749	2.4055e-17	4.5925	0.0021619	0.04236
3.53_340.172	-1.5383	2.1742e-17	-5.5653	4.4636e-07	5.1894e-06	6.1646												2.47_432.162	1.324	1.8876	2.3967	2.3377	-5.4268e-17	4.6747	0.0022277	0.038388		3.26_493.205	1.421	2.0327	0.63718	-0.29001	-1.7579e-17	4.3431	0.0031238	0.04236
2.6_378.053	-1.5383	-4.0708e-17	-5.5653	4.4647e-07	5.1894e-06	6.1644												1.73_459.003	1.527	1.9914	2.3951	2.0096	9.8995e-17	4.1038	0.0050059	0.038544		5.12_382.194	1.4387	1.5447	0.63256	-0.46701	-5.0885e-17	3.4475	0.011852	0.049786
4.43_496.25	-1.5377	1.3184e-17	-5.5622	4.5184e-07	5.2245e-06	6.153												4.5_496.251	0.77106	1.7825	2.3918	1.4863	-4.4409e-17	3.9749	0.0060195	0.039614		2.83_160.073	0.02128	0.040483	0.63243	2.182	-1.1565e-17	4.0058	0.0051519	0.04236
Catechin(+)	-1.5369	-3.562e-16	-5.5584	4.5876e-07	5.268e-06	6.1385												2.39_494.121	1.3022	1.9332	2.3916	2.2234	-2.35e-16	4.4805	0.0029299	0.038388		0.92_260.014	2.4438	1.4485	0.59217	0.79945	-2.158e-16	3.9613	0.0055046	0.04236
2.58_402.115	-1.5368	2.7484e-16	-5.5576	4.6035e-07	5.268e-06	6.1352												Salicylic acid glucoside 2	0.6501	1.582	2.391	1.2153	1.2027e-16	3.7939	0.0078048	0.043523		5.89_296.235	1.389	1.1735	0.57618	-0.82801	-4.7184e-17	3.6651	0.0085607	0.044364
1.65_334.09	-1.5357	2.9664e-17	-5.552	4.7061e-07	5.3578e-06	6.1142												3.7_555.138	1.3501	1.8209	2.3887	2.1903	-9.2519e-18	4.2687	0.003957	0.038388		Shikimic acid	2.1605	1.4784	0.5577	1.9173	3.7933e-17	3.8101	0.0068955	0.043033
4.16_540.2	-1.5353	8.4539e-17	-5.5499	4.746e-07	5.3756e-06	6.1061												4.59_515.258	1.4033	1.8784	2.3876	1.9129	-5.9212e-17	3.8759	0.0069374	0.040897		5.12_432.175	1.425	1.4669	0.55415	-0.54911	4.0708e-17	3.4755	0.011366	0.048903
Hydroxycinnamic acid/Coniferoyl aldehyde 1	-1.5348	3.932e-17	-5.5472	4.7971e-07	5.4059e-06	6.0959												3.65_400.211	1.5683	2.1408	2.3862	2.2605	-9.2519e-19	4.6519	0.0023001	0.038388		2_532.116	1.1312	1.2057	0.54664	-1.0133	1.4803e-17	3.8032	0.0069671	0.043033
2.86_664.256	-1.5344	1.1628e-16	-5.5452	4.8358e-07	5.4156e-06	6.0882												4.42_526.261	0.95632	1.5826	2.3857	1.8912	2.498e-17	3.9285	0.0064333	0.040196		5.12_312.23	1.3985	1.5678	0.51279	-0.57276	1.2212e-16	3.7441	0.0076084	0.043033
1.84_436.031	-1.5342	-1.8552e-16	-5.5442	4.8546e-07	5.4156e-06	6.0845												2.87_480.157	1.1271	1.8334	2.3854	1.4018	2.7756e-17	3.6234	0.0099779	0.047572		4.22_376.281	1.1262	2.0932	0.50393	-0.026568	-7.1933e-17	3.5527	0.010127	0.047514
Homogentisic acid/Hydroxymethoxybenzoic acid fr 2	-1.5337	-5.2273e-17	-5.5417	4.9031e-07	5.4424e-06	6.0751												1.64_603.177	1.2217	1.8041	2.3832	1.2631	9.807e-17	3.5381	0.011285	0.049997		4.19_202.12	1.5974	1.653	0.50273	-0.61367	-5.5511e-17	4.614	0.0020943	0.04236
4.04_374.194	-1.5327	-1.4199e-16	-5.5366	5.0039e-07	5.5267e-06	6.0556												2.82_425.981	1.3235	1.7913	2.3818	2.4041	-7.6328e-17	4.7236	0.0020797	0.038388		0.92_74.037	2.2306	1.4913	0.48519	0.24189	-7.4015e-18	4.0413	0.0048868	0.04236
6.07_815.565	1.5319	1.4317e-16	5.5321	5.0941e-07	5.5635e-06	6.0386												2.76_448.157	1.1329	2.0719	2.3803	1.448	-7.0545e-17	4	0.0058072	0.039284		1.33_324.106	1.3295	1.2938	0.46938	-0.9387	1.9614e-16	4.152	0.0041463	0.04236
1.82_348.064	-1.5317	-1.0547e-16	-5.5313	5.1087e-07	5.5635e-06	6.0359												4.25_438.246	1.2737	2.097	2.3796	1.3203	9.3675e-17	3.9723	0.0060418	0.039614		4.28_188.141	1.0496	2.0738	0.4497	-0.49735	5.5511e-17	4.6395	0.0020173	0.04236
6.08_296.235	1.5317	2.9606e-17	5.5312	5.1124e-07	5.5635e-06	6.0352												1.31_206.079	1.6691	2.0594	2.3787	2.1429	9.807e-17	4.3211	0.003673	0.038388		6.08_561.246	2.0835	0.003015	0.44273	-0.028035	4.6259e-17	3.7057	0.0080572	0.044044
2.6_204.079	-1.5313	6.9158e-17	-5.529	5.1554e-07	5.5829e-06	6.0272												0.91_240.067	1.0949	1.9528	2.3774	1.5448	-1.3392e-16	3.8408	0.0072961	0.042074		5.12_294.219	1.6193	1.4568	0.43339	-0.57683	-1.6653e-17	4.0551	0.0047876	0.04236
3.52_486.232	-1.5308	1.2825e-16	-5.5263	5.2114e-07	5.6162e-06	6.0169												2.39_444.121	1.0256	2.3486	2.3751	1.4073	9.4369e-17	4.7502	0.0020033	0.038388		6.08_577.21	2.324	0.20401	0.42687	0.26421	3.0254e-16	4.1617	0.0040866	0.04236
3.24_392.115	-1.5294	-3.1919e-17	-5.5192	5.3614e-07	5.7185e-06	5.9898												2.48_349.137	1.1392	1.9844	2.3736	1.8985	1.4803e-17	4.1293	0.0048268	0.038544		3.56_374.147	0.43337	2.3832	0.41908	1.2655	-4.7878e-17	4.1209	0.0043419	0.04236
3.32_702.218	-1.5292	5.7593e-17	-5.5181	5.3851e-07	5.7185e-06	5.9856												3.05_486.131	1.8814	1.3071	2.3717	2.4689	5.7362e-17	4.953	0.0015078	0.038388		1.81_243.069	1.9512	1.9596	0.36035	0.97241	1.7972e-16	3.6219	0.0091322	0.045558
5.08_466.276	-1.5291	1.5728e-17	-5.5178	5.3902e-07	5.7185e-06	5.9847												3.52_486.232	1.1144	2.1272	2.3698	1.2111	2.9143e-17	4.1374	0.0047716	0.038544		1.65_388.079	1.391	0.79994	0.31655	-1.0097	1.8504e-17	3.6514	0.0087376	0.044772
4.46_592.306	-1.5289	1.6653e-17	-5.5169	5.4094e-07	5.7185e-06	5.9813												1.55_380.088	1.8956	0.92391	2.366	2.0118	-1.2444e-16	4.4225	0.0031808	0.038388		0.92_262.949	2.1579	0.62561	0.30185	-0.060543	8.6505e-17	3.7407	0.0076469	0.043033
2.82_474.085	-1.5287	-6.9158e-17	-5.5156	5.4389e-07	5.7225e-06	5.9761												2.39_520.139	1.1835	2.1846	2.3659	2.0207	-2.1539e-17	4.5665	0.0025946	0.038388		6.24_543.256	1.9536	0.19545	0.30019	-0.55388	-9.9457e-17	4.0391	0.0049029	0.04236
3.26_378.188	-1.5277	3.2382e-17	-5.5106	5.5459e-07	5.8075e-06	5.9575												2.37_282.131	1.2486	1.8589	2.3658	1.6109	1.9082e-16	3.608	0.010203	0.047854		6.16_577.208	2.0126	0.13665	0.27835	-0.32881	9.1593e-17	3.8228	0.006766	0.043033
Dehydroquercetin 3	-1.527	-1.4699e-16	-5.5071	5.625e-07	5.8627e-06	5.944												3.28_324.142	1.2035	1.688	2.3647	1.8092	-9.859e-18	3.621	0.010012	0.047572		1.93_383.106	2.2157	0.96113	0.2398	1.3458	2.7941e-16	3.5451	0.010243	0.047726
3.05_416.168	-1.5257	-1.9244e-16	-5.5001	5.7813e-07	5.9974e-06	5.9179												4.25_523.26	1.7981	2.0432	2.3586	1.5256	5.5511e-18	3.8788	0.0069095	0.040897		6.08_976.551	2.0807	-0.089936	0.22161	-0.49807	-6.3838e-17	4.7652	0.0016771	0.04236
Homogentisic acid/Hydroxymethoxybenzoic acid glucoside 2	-1.525	2.7889e-16	-5.4967	5.8597e-07	6.0455e-06	5.9051												2.37_381.048	1.4576	1.6883	2.3582	1.9296	-1.6653e-17	3.661	0.0094513	0.046687		5.61_314.244	1.3968	-0.35566	0.21958	-1.1284	6.7076e-18	3.852	0.0064781	0.043033
3.48_564.181	-1.5249	3.562e-17	-5.4958	5.8821e-07	6.0455e-06	5.9014												3.88_424.23	0.57462	1.9018	2.3549	0.95954	5.9212e-17	4.3842	0.0033583	0.038388		6.24_521.275	1.7357	0.069463	0.20857	-0.78423	7.1239e-17	3.8223	0.0067712	0.043033
4.16_590.182	-1.5245	1.9429e-17	-5.4939	5.9269e-07	6.0509e-06	5.8942												3.7_473.209	1.2284	2.2539	2.3545	1.7182	3.1456e-17	4.3285	0.0036345	0.038388		0.92_100.016	2.2765	1.6197	0.19965	0.27783	-1.4063e-16	4.8385	0.0015061	0.04236
Prodelphinidin trimer 1	-1.5243	-6.43e-17	-5.4929	5.9494e-07	6.0509e-06	5.8906												1.08_284.111	0.86121	2.2485	2.3529	1.707	9.7145e-18	4.7826	0.0019143	0.038388		3.64_432.105	0.90802	2.1601	0.19946	0.17013	1.0177e-17	3.585	0.0096494	0.046547
1.84_374.061	-1.5238	8.5811e-17	-5.4905	6.0075e-07	6.0509e-06	5.8813												2.8_469.134	1.0805	2.2421	2.3524	1.543	4.0419e-17	4.3581	0.0034853	0.038388		4.12_642.212	-1.4946	0.59627	0.18144	0.85564	-6.1294e-18	3.7912	0.0070924	0.043033
3.3_706.303	-1.5238	1.0593e-16	-5.4904	6.01e-07	6.0509e-06	5.8809												3.05_504.142	1.8604	1.7956	2.351	2.4374	5.4528e-17	4.6662	0.0022545	0.038388		1.8_273.029	2.1436	1.5892	0.17659	0.28149	-1.5497e-16	4.2962	0.0033481	0.04236
Tremuloidin 1	-1.5237	2.3708e-16	-5.4896	6.027e-07	6.0509e-06	5.8782												2.39_442.123	0.99596	2.3682	2.3504	1.6383	-4.8572e-17	4.8277	0.0017969	0.038388		6.23_477.285	1.5282	-0.38689	0.15912	-0.8088	7.5865e-17	3.4801	0.011288	0.048897
1.92_482.106	-1.5234	-1.6017e-16	-5.4885	6.0539e-07	6.0509e-06	5.874												5.08_524.282	0.87419	1.7743	2.3501	1.1059	3.5388e-17	3.6581	0.0094904	0.046687		2.75_216.147	1.1188	1.454	0.15378	-0.91786	-3.3769e-17	4.1005	0.0044759	0.04236
3.62_466.204	-1.5232	-3.7065e-17	-5.4875	6.0781e-07	6.0509e-06	5.8702												3.05_546.135	1.5907	1.7507	2.3493	2.3766	-7.679e-17	4.4441	0.0030848	0.038388		0.92_201.979	2.1646	0.54575	0.14991	-0.2119	2.7756e-18	4.1978	0.0038736	0.04236
0.55_102.032	1.5224	-4.6259e-19	5.4833	6.1811e-07	6.1104e-06	5.8541												1.26_314.121	1.2822	1.3815	2.3442	2.2942	-4.6722e-17	4.2953	0.0038101	0.038388		6.16_976.55	1.935	-0.27396	0.1475	-0.5588	1.9429e-17	4.4692	0.0025929	0.04236
2.93_408.199	-1.5223	2.4286e-18	-5.4828	6.1929e-07	6.1104e-06	5.8523												2.25_352.136	1.1426	2.1516	2.3437	0.81489	-3.1456e-17	4.4712	0.0029687	0.038388		Tyrosine	1.3908	0.7163	0.14724	-1.2269	-9.5757e-17	4.3591	0.0030507	0.04236
Acetyl-salicin 2 (FA)	-1.5207	-3.8395e-17	-5.4742	6.4069e-07	6.2855e-06	5.8199												2.77_380.089	1.7219	1.9169	2.3435	1.978	2.2204e-17	3.8918	0.0067808	0.040897		6.08_477.286	1.9315	-0.26534	0.14553	-0.49509	4.1587e-16	4.2996	0.0033312	0.04236
1.82_376.059	-1.5205	-2.9606e-17	-5.4734	6.4271e-07	6.2855e-06	5.8169												3.44_468.173	1.0642	2.2245	2.3426	0.89021	8.1416e-17	4.6097	0.0024411	0.038388		2.33_418.11	1.1659	1.423	0.12992	-0.74608	1.7902e-16	3.5634	0.0099663	0.047448
Caffeoyl glucose 3	-1.5188	-1.3184e-17	-5.4647	6.6531e-07	6.478e-06	5.784												1.6_308.113	1.9546	1.617	2.3407	2.0121	4.1633e-17	3.9389	0.0063387	0.040186		3.37_500.246	1.628	-0.036421	0.1286	-0.91754	-8.5348e-17	3.8325	0.0066685	0.043033
3.14_428.191	-1.5186	7.494e-17	-5.4635	6.6835e-07	6.4792e-06	5.7796												1.32_386.089	0.85087	2.079	2.3371	1.9268	-2.498e-17	4.6338	0.0023598	0.038388		1_261.052	1.4809	-0.20814	0.11192	-1.2753	1.1692e-16	4.5147	0.0024244	0.04236
3.31_541.122	-1.5179	1.3415e-16	-5.4599	6.7797e-07	6.5439e-06	5.766												3.67_437.132	1.5422	2.0204	2.3365	2.4442	-4.811e-17	4.79	0.0018943	0.038388		6.16_477.285	1.7792	-0.33174	0.10927	-0.7682	4.3484e-17	4.3454	0.0031131	0.04236
1.82_405.011	-1.5161	9.1131e-17	-5.4511	7.0202e-07	6.7466e-06	5.7328												2.77_310.127	1.4802	2.2606	2.336	1.5131	2.6738e-16	4.1171	0.0049115	0.038544		6.16_543.256	1.5925	-0.11262	0.10783	-0.98059	8.1416e-17	3.9232	0.0058262	0.043033
3.48_558.186	-1.5158	1.6434e-16	-5.4492	7.0727e-07	6.7678e-06	5.7257												2.1_392.131	0.9686	2.2456	2.3354	1.0341	1.8504e-17	4.5794	0.0025479	0.038388		1.08_438.104	1.1634	0.67977	0.092397	-1.4708	-3.3769e-17	4.6169	0.0020854	0.04236
2.78_512.131	-1.5133	-1.7671e-16	-5.4363	7.4415e-07	7.0902e-06	5.6772												3.15_322.162	0.94913	1.783	2.3346	1.181	4.8919e-17	3.537	0.011303	0.049997		2.18_438.136	0.9429	0.69558	0.085795	-1.44	-2.7663e-16	3.9091	0.0059494	0.043033
Salicyl-HCH (Acylsaligenin)	-1.5126	5.2967e-17	-5.4331	7.5349e-07	7.1262e-06	5.6653												1.61_312.142	1.5312	1.6938	2.3334	2.0882	-1.0628e-16	3.8263	0.0074503	0.042239		4.12_220.11	-1.3902	0.62539	0.078483	0.90718	-9.8359e-17	3.5158	0.010701	0.048125
5.85_594.28	-1.5126	6.2681e-17	-5.4328	7.5435e-07	7.1262e-06	5.6642												2.8_547.15	1.3144	1.6705	2.3325	2.3797	-1.1935e-16	4.4839	0.0029162	0.038388		3.26_492.184	1.4215	0.17546	0.069145	-1.209	-3.7007e-18	3.9613	0.0055047	0.04236
3.84_480.22	-1.5109	-3.7933e-17	-5.4245	7.7945e-07	7.3321e-06	5.633												3.3_432.188	0.69709	1.8603	2.3314	1.7131	1.5728e-17	4.2252	0.00421	0.038388		1.58_375.115	1.3892	0.21065	0.056233	-1.1346	1.0339e-16	3.6041	0.0093775	0.04615
2.85_450.209	-1.5086	-2.0817e-17	-5.4125	8.1732e-07	7.6531e-06	5.5878												1.99_453.181	1.0855	1.4821	2.3302	1.942	-1.1102e-17	3.6781	0.0092212	0.046607		3.31_596.136	1.8122	0.039947	0.053173	-0.47991	5.181e-17	3.4755	0.011366	0.048903
3.09_290.173	-1.5082	1.404e-16	-5.4107	8.2329e-07	7.6531e-06	5.5809												2.1_438.137	0.97937	2.0661	2.3268	0.85349	1.2906e-16	4.2526	0.0040491	0.038388		Coumaric acid glucoside 5	0.078865	0.79906	0.040429	-1.6136	7.6328e-17	3.5289	0.010493	0.047855
Caffeoylshikimate	-1.5082	1.1056e-16	-5.4105	8.2391e-07	7.6531e-06	5.5802												3.77_430.183	1.1821	2.3717	2.3238	1.7123	3.932e-18	4.5757	0.0025612	0.038388		0.76_168.028	1.8544	1.212	0.037736	-0.12643	1.3138e-16	3.5268	0.010526	0.047855
Salicylic acid fr 5	-1.5072	4.7763e-17	-5.4052	8.4102e-07	7.7794e-06	5.5606												3.24_500.246	1.1536	1.855	2.3226	0.78964	1.0177e-17	3.7869	0.0078849	0.043523		1.01_131.095	1.0583	-0.095238	0.035512	-1.5483	-6.2913e-17	3.9491	0.0056056	0.042596
4.53_488.238	-1.5063	-4.811e-17	-5.4009	8.5566e-07	7.8821e-06	5.5441												3.05_561.09	1.4963	1.6891	2.3199	2.4918	5.5511e-18	4.6669	0.0022523	0.038388		4.08_214.022	1.1762	-1.1091	0.025486	-1.0603	7.5171e-17	4.0639	0.004726	0.04236
Salirepin 1 (FA)	-1.5055	-3.4001e-17	-5.397	8.6865e-07	7.9686e-06	5.5298												3.94_568.177	0.77929	1.6674	2.3097	1.5168	1.0501e-16	3.5844	0.010556	0.048428		0.52_427.029	1.0102	0.093518	0.0072703	-1.625	2.0724e-16	4.155	0.0041276	0.04236
3.31_596.136	-1.5046	9.7145e-18	-5.3922	8.853e-07	8.0226e-06	5.5117												4.25_484.252	1.6713	2.1719	2.3096	1.703	-1.2953e-16	3.9369	0.006356	0.040186		1.11_244.07	1.6303	0.6947	0.001718	-0.83511	-1.6931e-16	3.8483	0.0065136	0.043033
4.21_374.266	-1.5045	1.6075e-16	-5.3919	8.8649e-07	8.0226e-06	5.5104												4.11_482.235	1.4905	2.5344	2.3065	1.589	-9.7607e-17	4.7455	0.0020165	0.038388		1.37_313.101	1.6188	0.59546	-0.021017	-0.9618	-5.8749e-17	4.1275	0.0042997	0.04236
1.82_573.089	-1.5042	-3.8858e-17	-5.3902	8.9224e-07	8.0226e-06	5.5042												3.32_518.158	1.9649	1.6672	2.3055	2.3125	-1.9891e-17	4.3601	0.003475	0.038388		1.05_311.032	1.848	0.53817	-0.0271	-0.80938	-2.7143e-16	4.5251	0.0023873	0.04236
3.21_522.205	-1.504	1.1056e-16	-5.389	8.964e-07	8.0226e-06	5.4998												0.54_107.988	1.5495	1.8725	2.3052	2.5214	-1.6653e-17	4.7885	0.0018985	0.038388		6.34_664.283	1.5668	-0.50732	-0.038704	-0.64591	-5.4788e-17	3.4629	0.011582	0.049443
4.53_566.254	-1.5039	3.3075e-17	-5.3889	8.9695e-07	8.0226e-06	5.4992												1.65_1148.045	1.7185	1.9723	2.3042	1.8174	4.6259e-17	3.7188	0.0086957	0.045702		6.08_280.24	1.7929	-0.2917	-0.041458	-0.72609	-4.3946e-17	4.2996	0.0033315	0.04236
3.5_534.173	-1.5038	-2.3407e-16	-5.3881	8.9958e-07	8.0226e-06	5.4964												3.25_508.187	1.5621	2.158	2.2999	1.9445	2.7756e-18	4.0511	0.0053978	0.038618		2.58_368.168	0.83117	-0.019635	-0.04751	-1.6843	-2.4633e-17	3.8055	0.0069432	0.043033
4.53_498.267	-1.5036	-6.3838e-17	-5.3871	9.0332e-07	8.0226e-06	5.4925												1.52_326.119	1.279	2.0425	2.2945	1.6867	-1.3161e-16	3.7228	0.0086458	0.045702		6.24_559.23	1.6684	-0.40535	-0.055471	-0.75241	-8.2342e-17	3.9608	0.0055089	0.04236
4.2_352.173	1.5036	8.0665e-17	5.387	9.0344e-07	8.0226e-06	5.4923												3.05_530.16	1.9228	1.8904	2.2901	2.5908	1.1472e-16	5.0085	0.0013955	0.038388		2.9_402.152	1.1704	0.29761	-0.05999	-1.3671	-1.966e-17	3.7645	0.0073807	0.043033
4.17_420.198	-1.5027	-3.0069e-17	-5.3827	9.192e-07	8.0735e-06	5.4759												2.76_102.068	1.4918	2.0862	2.2874	1.6612	-1.0012e-16	3.7062	0.0088558	0.046077		6.08_545.272	1.7919	-0.50819	-0.073243	-0.50801	-4.4814e-17	4.1785	0.003986	0.04236
3.45_538.203	-1.5027	-2.7871e-17	-5.3826	9.1934e-07	8.0735e-06	5.4757												2.85_510.154	1.8004	1.8372	2.284	2.2238	-2.7062e-17	4.0921	0.00509	0.038583		1.22_1083.054	0.73098	0.062897	-0.099542	-2.0401	-2.4055e-17	5.2115	0.00087398	0.04236
3.49_1056.383	-1.5026	1.3878e-18	-5.3824	9.2009e-07	8.0735e-06	5.4749												4.26_474.223	1.5383	2.2422	2.2766	1.3845	-3.0022e-16	3.96	0.0061493	0.040019		1.08_261.053	1.2185	0.55697	-0.10035	-1.5564	7.5865e-17	5.0269	0.0011435	0.04236
3.25_370.184	-1.5018	-2.2204e-17	-5.3779	9.3638e-07	8.1841e-06	5.4582												3.68_470.199	0.74891	2.1284	2.2733	1.3033	-7.4015e-18	4.2653	0.0039766	0.038388		1.22_188.049	0.86734	-0.276	-0.11505	-1.798	-6.1756e-17	4.3058	0.0033011	0.04236
1.82_454.994	-1.5016	-2.1973e-17	-5.3769	9.4038e-07	8.1868e-06	5.4542												2.77_430.073	1.5424	2.1309	2.2728	1.8127	-7.2164e-17	3.8359	0.0073477	0.042138		1.08_131.094	1.1014	0.7148	-0.12211	-1.5391	1.2953e-17	4.8474	0.0014867	0.04236
Benzyl salicylate 1	-1.5013	3.4463e-17	-5.3758	9.4438e-07	8.1896e-06	5.4501												3.26_446.173	0.96672	1.7961	2.2721	1.6894	2.0354e-17	3.5586	0.010956	0.049453		1.59_336.106	0.94627	-0.62809	-0.16725	-1.5884	-3.8627e-17	3.8953	0.0060726	0.043033
2.17_252.12	-1.5007	-1.7087e-17	-5.3727	9.5579e-07	8.2563e-06	5.4387												4.05_566.203	1.2808	2.4295	2.2717	2.3925	3.7007e-17	5.4825	0.00072399	0.038388		1.97_326.157	1.2182	-0.015961	-0.17298	-1.304	1.8966e-16	3.5897	0.0095821	0.046519
1.59_311.009	1.5004	-1.6503e-16	5.3713	9.6124e-07	8.2711e-06	5.4333												3.94_501.21	1.2316	1.867	2.2711	1.8001	-7.5639e-17	3.5389	0.011273	0.049997		1.22_102.032	0.91912	0.2844	-0.17325	-1.86	1.3415e-17	5.1058	0.0010193	0.04236
2.54_426.173	-1.4993	1.8504e-18	-5.3655	9.8323e-07	8.4089e-06	5.4117												0.69_338.084	1.0945	2.1704	2.271	0.95448	-2.3916e-16	4.1547	0.0046548	0.038544		6.16_545.272	1.5741	-0.54422	-0.1751	-1.085	-6.7654e-18	4.656	0.001969	0.04236
3.05_582.119	-1.4992	5.5511e-17	-5.3651	9.8483e-07	8.4089e-06	5.4102												3.32_546.153	1.8514	1.8019	2.2692	2.4236	-5.7362e-17	4.474	0.002957	0.038388		5.16_493.28	1.4889	0.29211	-0.17716	-0.97914	-1.0732e-16	3.6092	0.0093063	0.045903
2.87_452.145	-1.4988	9.3444e-17	-5.3629	9.9352e-07	8.4384e-06	5.4018												2.91_340.172	1.8166	2.0952	2.2628	1.426	-1.0796e-16	3.7769	0.0079982	0.043927		2.9_448.157	1.1142	0.51717	-0.18213	-1.2707	-4.2559e-17	3.5252	0.010552	0.047855
Prodelphinidin trimer 7	-1.4986	-1.5641e-17	-5.3618	9.9763e-07	8.4384e-06	5.3978												1.42_257.138	1.1629	1.7498	2.2581	2.0621	4.0708e-17	3.7948	0.0077951	0.043523		Coumarin 2	0.57293	-0.83849	-0.18614	-1.9212	-2.424e-16	4.1739	0.0040136	0.04236
6.01_288.23	-1.4985	2.8681e-17	-5.3613	9.9968e-07	8.4384e-06	5.3959												3.57_406.184	0.68147	1.0814	2.2547	1.792	5.5511e-18	3.6207	0.010017	0.047572		6.15_996.616	1.528	-0.50378	-0.18993	-1.0694	7.4015e-18	4.3506	0.0030893	0.04236
2.61_404.072	-1.498	7.228e-17	-5.3588	1.0096e-06	8.4901e-06	5.3865												2.44_338.157	1.1323	1.8815	2.2527	2.0345	-6.6613e-17	3.8984	0.0067176	0.040777		1.37_135.054	1.4309	0.4206	-0.20053	-1.1377	2.3592e-17	4.0025	0.0051773	0.04236
1.82_544.136	-1.4968	1.1519e-16	-5.353	1.0327e-06	8.6515e-06	5.3649												3.3_706.303	1.214	1.8314	2.2526	0.74645	-3.5157e-17	3.5841	0.010561	0.048428		3.31_541.122	0.62026	-0.88323	-0.20755	-1.688	1.1218e-17	3.4923	0.011084	0.048541
3.32_466.159	-1.4966	7.4015e-17	-5.3519	1.0373e-06	8.6569e-06	5.3607												2.78_301.116	1.6954	2.0759	2.2513	1.9884	-1.8504e-17	3.8917	0.0067818	0.040897		1.09_277.025	0.94713	0.37144	-0.20946	-1.7317	-2.0354e-17	4.6975	0.0018523	0.04236
2.49_318.144	-1.496	-1.4248e-16	-5.3488	1.05e-06	8.7306e-06	5.3491												3.32_466.159	1.6013	2.034	2.2506	2.0359	-6.4763e-17	3.8772	0.0069245	0.040897		1.22_162.053	0.79162	0.19375	-0.21003	-1.9577	-1.0547e-16	5.0817	0.0010558	0.04236
1.85_420.125	-1.4956	7.9566e-17	-5.3469	1.0579e-06	8.7446e-06	5.342												3.21_489.204	0.79408	1.8138	2.2495	1.5598	-3.5157e-17	3.6193	0.010037	0.047572		6.15_1064.602	1.4479	-0.56949	-0.22977	-1.1653	-8.1416e-17	4.38	0.0029578	0.04236
2.6_633.068	-1.4955	-4.5912e-17	-5.3465	1.0596e-06	8.7446e-06	5.3404												4.13_496.215	1.1501	1.9182	2.2437	0.48968	2.0817e-17	4.1433	0.0047314	0.038544		3.31_442.205	1.3733	-0.003541	-0.23592	-1.1234	8.9743e-17	3.5954	0.0095005	0.046412
3.63_434.214	-1.4953	9.4369e-17	-5.3452	1.0647e-06	8.7539e-06	5.3359												3.05_452.144	1.3907	2.244	2.2412	1.8586	1.4757e-16	4.0532	0.0053813	0.038618		1.22_164.058	0.85535	0.22688	-0.24179	-1.8704	-7.7253e-17	4.8839	0.0014094	0.04236
3.07_568.142	-1.4928	1.2143e-18	-5.3326	1.1185e-06	9.1629e-06	5.2889												1.49_348.152	0.97167	1.978	2.241	2.2853	-2.0169e-16	4.7148	0.0021055	0.038388		1.01_277.024	0.8181	-0.47948	-0.24262	-1.6887	5.6552e-17	3.7267	0.007809	0.043516
2.78_340.101	-1.492	-4.5334e-17	-5.3286	1.1365e-06	9.2635e-06	5.2737												2.91_328.08	0.9845	1.7137	2.235	2.4927	1.5873e-17	4.9701	0.0014724	0.038388		1.22_100.052	0.64211	0.056805	-0.25392	-2.0714	1.5245e-16	5.0525	0.0011016	0.04236
3.48_560.184	-1.4918	1.4849e-16	-5.3279	1.1397e-06	9.2635e-06	5.2711												3.2_400.212	1.078	2.2396	2.2311	1.1216	0	4.1008	0.0050274	0.038544		1.22_118.063	0.83588	0.18754	-0.26807	-1.9229	5.4586e-17	5.0359	0.0011286	0.04236
3.26_446.173	-1.4917	-1.9961e-16	-5.327	1.1433e-06	9.2635e-06	5.268												3.98_468.22	0.9551	2.3029	2.2286	1.3166	1.0397e-16	4.3129	0.0037159	0.038388		Salicyl aldehyde/Benzoic acid 1	1.7192	0.35266	-0.27312	-0.78164	1.2814e-16	4.0743	0.0046529	0.04236
3.32_476.189	-1.4903	1.7717e-16	-5.3201	1.175e-06	9.4855e-06	5.242												4.74_524.246	0.67539	1.9396	2.2281	1.2873	4.7271e-17	3.8247	0.0074671	0.042239		1.22_362.056	0.71008	0.080259	-0.28243	-2.0403	1.4109e-17	5.1152	0.0010055	0.04236
3.48_1082.38	-1.4874	-8.7893e-17	-5.3056	1.2435e-06	9.9025e-06	5.188												3.25_432.176	0.81435	2.1363	2.2243	1.5978	-6.1062e-17	4.1567	0.0046416	0.038544		6.16_561.246	1.2925	-0.87419	-0.28282	-0.94928	-9.0437e-17	3.7012	0.0081118	0.044053
5_646.204	-1.4872	7.4188e-17	-5.3047	1.2478e-06	9.9025e-06	5.1847												3.05_514.142	1.1546	2.1515	2.2229	1.3389	8.6042e-17	3.7381	0.0084577	0.045411		1.22_204.021	0.72711	-0.4108	-0.28315	-1.8716	6.1062e-17	4.1377	0.0042352	0.04236
3.05_454.142	-1.4872	-1.2953e-17	-5.3046	1.2483e-06	9.9025e-06	5.1844												2.01_448.121	0.8596	2.1155	2.2227	0.77339	-2.4795e-16	4.2578	0.004019	0.038388		1.22_378.024	0.59482	0.0026608	-0.28455	-2.1352	-4.7647e-17	5.1842	0.00090943	0.04236
Dehydroquercetin 2	-1.4872	-1.0732e-16	-5.3045	1.2486e-06	9.9025e-06	5.1841												3.96_494.233	0.54152	2.0419	2.2172	1.2977	8.6967e-17	4.262	0.0039951	0.038388		1.6_280.116	1.1738	0.033736	-0.29177	-1.5677	1.4988e-16	4.4631	0.0026161	0.04236
2.87_445.178	-1.487	1.8504e-18	-5.3036	1.2531e-06	9.9025e-06	5.1807												4.26_476.22	1.515	2.3354	2.2131	1.6286	2.619e-16	4.0288	0.0055728	0.038869		3.99_344.219	0.69028	-1.6676	-0.29373	-0.99835	-1.8504e-17	3.7372	0.0076871	0.043033
2.81_482.105	-1.487	-1.3473e-16	-5.3036	1.2534e-06	9.9025e-06	5.1804												4.07_532.211	1.0941	2.0841	2.2127	1.2312	2.365e-17	3.6255	0.0099482	0.047572		6.07_996.616	1.5618	-0.40514	-0.31546	-1.0067	2.4778e-17	4.2857	0.0034007	0.04236
0.78_294.095	-1.4865	9.2056e-17	-5.301	1.2659e-06	9.9347e-06	5.171												2.35_332.111	1.1677	2.0914	2.2114	1.6941	-2.8681e-17	3.6947	0.0090034	0.046151		6.07_1064.603	1.5033	-0.66055	-0.31585	-0.8589	-2.0504e-16	4.0098	0.0051212	0.04236
5.08_524.282	-1.4863	1.5728e-17	-5.3003	1.2694e-06	9.9347e-06	5.1684												4.48_526.261	0.26268	1.6699	2.2084	1.2861	-4.996e-17	4.0756	0.0052119	0.038586		0.84_405.136	1.9042	1.6748	-0.31963	0.86507	-4.4409e-17	4.5237	0.0023923	0.04236
3.61_410.066	-1.4863	6.2913e-17	-5.3	1.2709e-06	9.9347e-06	5.1672												3.1_304.153	1.4002	1.8459	2.2037	2.1985	-2.9513e-16	3.8743	0.0069541	0.040897		1.06_122.004	1.2959	0.29064	-0.31982	-1.1194	-3.7007e-18	3.4784	0.011317	0.048897
3.48_522.21	-1.4859	1.0362e-16	-5.2981	1.2804e-06	9.974e-06	5.1601												2.39_551.068	1.2794	1.6956	2.1997	2.3906	2.498e-17	4.2536	0.0040434	0.038388		3.57_442.205	0.70592	-0.3265	-0.3206	-1.7206	4.4409e-17	3.4798	0.011293	0.048897
4.25_580.301	-1.4852	3.5157e-17	-5.2946	1.2981e-06	1.0044e-05	5.1471												4.67_566.254	0.52978	1.6961	2.1987	1.7293	-1.2982e-17	3.9458	0.0062761	0.04009		1.22_246.005	0.89472	-0.2359	-0.32397	-1.8828	-2.0354e-17	4.7364	0.0017496	0.04236
1.89_542.051	-1.4852	1.0339e-16	-5.2945	1.2985e-06	1.0044e-05	5.1468												4.53_515.257	0.72347	1.9198	2.1944	1.2575	5.2736e-17	3.6166	0.010076	0.047624		6.16_280.241	1.5214	-0.65373	-0.32557	-1.0245	-2.3824e-17	4.4835	0.0025386	0.04236
2.85_258.11	-1.4849	1.2906e-16	-5.2933	1.3049e-06	1.0058e-05	5.1421												2.78_347.122	1.6553	2.0484	2.1924	1.9743	-2.0817e-18	3.7233	0.0086396	0.045702		3.65_554.145	0.76718	1.7758	-0.33083	1.3666	0	3.5347	0.010404	0.047818
3.48_466.204	-1.484	1.8272e-17	-5.2889	1.3274e-06	1.0145e-05	5.1258												3.25_458.197	1.1942	2.1226	2.1877	1.3673	2.1164e-17	3.571	0.010762	0.048779		1.23_472.178	0.39561	0.19413	-0.33178	-2.1635	1.5589e-16	5.0777	0.0010619	0.04236
3.48_1097.33	-1.484	-4.1633e-17	-5.2886	1.3289e-06	1.0145e-05	5.1248												Isopropylmalate-like 4	1.0454	2.0408	2.1857	1.7251	2.4402e-17	3.6777	0.0092271	0.046607		1.22_346.088	0.89065	0.16578	-0.33228	-1.7577	2.1279e-17	4.4211	0.0027836	0.04236
4.19_202.12	1.4839	1.7116e-17	5.2884	1.3298e-06	1.0145e-05	5.1241												4.26_578.257	1.5786	2.2076	2.1795	1.2455	4.3946e-17	3.7442	0.0083834	0.045411		4.37_484.252	1.415	-0.12088	-0.33266	-1.0916	4.5797e-17	3.7444	0.0076052	0.043033
4.67_488.238	-1.4833	-2.8392e-17	-5.2855	1.3451e-06	1.0226e-05	5.1132												1.72_408.076	1.4856	2.1345	2.1774	0.71799	2.9421e-16	4.1215	0.0048808	0.038544		6.3_562.335	1.8392	-0.28774	-0.34964	0.11279	-1.7949e-16	3.663	0.0085875	0.044364
3.05_584.209	-1.4829	6.245e-17	-5.283	1.358e-06	1.0289e-05	5.1041												1.4_406.121	1.386	2.3873	2.1764	1.4957	-8.0144e-17	4.0893	0.005111	0.038583		6.15_679.316	1.0206	-0.72571	-0.34993	-1.3973	1.4898e-16	3.6187	0.0091757	0.045558
3.48_568.215	-1.481	4.0246e-16	-5.2737	1.4083e-06	1.0579e-05	5.0695												1.08_195.057	0.88549	1.8053	2.1692	0.28993	6.1987e-17	4.1201	0.0048906	0.038544		1.21_493.179	0.28927	0.073876	-0.35719	-2.2777	-1.6653e-17	5.2486	0.00082812	0.04236
2.78_432.127	-1.481	9.2519e-19	-5.2737	1.4085e-06	1.0579e-05	5.0694												5.66_830.421	1.3436	2.0418	2.1675	2.0355	-7.4015e-17	3.7895	0.0078549	0.043523		2.58_414.173	0.63994	-0.14412	-0.36913	-1.8361	-6.962e-17	3.7951	0.0070516	0.043033
3.14_612.132	-1.4809	1.4803e-17	-5.2733	1.4109e-06	1.0579e-05	5.0677												Phenol fragment 3	1.73	2.1621	2.1662	1.6788	3.562e-17	3.6587	0.0094831	0.046687		6.15_1084.669	1.2838	-0.56965	-0.37845	-1.2143	-5.5511e-18	3.9064	0.0059734	0.043033
2_534.065	-1.4807	1.2895e-17	-5.2725	1.4152e-06	1.0579e-05	5.0648												1.75_309.061	1.1145	2.1596	2.1638	1.1466	1.3646e-16	3.6949	0.0090002	0.046151		1.3_298.124	1.5852	-0.07844	-0.38417	-0.69259	1.5728e-17	3.4714	0.011436	0.04911
4.49_498.267	-1.4804	-1.0038e-16	-5.2708	1.4246e-06	1.0613e-05	5.0585												2.85_438.173	1.0998	2.3318	2.1586	1.1076	0	4.1681	0.0045666	0.038544		1.22_261.976	0.61021	-0.30759	-0.40504	-2.0058	8.0954e-18	4.362	0.0030377	0.04236
Catechin glucoside	-1.48	7.0314e-17	-5.2688	1.4354e-06	1.0658e-05	5.0513												3.05_582.119	1.9044	2.0572	2.1564	2.4788	-7.4015e-17	4.6362	0.0023516	0.038388		3.89_146.094	1.0539	0.5313	-0.41566	-1.43	4.538e-16	4.1276	0.0042993	0.04236
2.18_135.054	1.4798	5.0827e-17	5.2679	1.4407e-06	1.0662e-05	5.0478												2.65_470.196	1.0399	2.1871	2.1536	0.58672	1.8504e-17	4.4126	0.003226	0.038388		1.58_253.071	0.49468	-0.21106	-0.42044	-2.1481	-3.8858e-17	4.7501	0.0017147	0.04236
2.47_606.124	-1.4795	1.1102e-17	-5.2662	1.4506e-06	1.0699e-05	5.0414												2.76_208.057	1.5145	2.3762	2.1519	1.7634	-6.6151e-17	4.0693	0.0052586	0.038586		6.08_607.243	1.6309	-0.77051	-0.42471	-0.38565	4.2443e-17	4.1066	0.0044353	0.04236
4.11_482.269	-1.479	-5.2736e-17	-5.2638	1.4638e-06	1.076e-05	5.0327												4.2_352.173	0.76225	1.6179	2.1468	1.9149	-1.0316e-16	3.6154	0.010094	0.047624		6.08_613.258	1.357	-0.90101	-0.42826	-0.75392	-4.4409e-17	3.7228	0.0078545	0.043658
1.3_394.084	-1.4779	-8.6389e-17	-5.2584	1.4949e-06	1.092e-05	5.0127												0.69_338.085	0.75524	2.0756	2.1437	1.004	2.9552e-16	3.8386	0.0073195	0.042092		1.22_160.004	0.81901	-0.089496	-0.42952	-1.8739	1.4225e-16	4.5239	0.0023917	0.04236
3.45_684.261	-1.4779	-6.2334e-17	-5.2584	1.4953e-06	1.092e-05	5.0124												Homogentisic acid/Hydroxymethoxybenzoic acid glucoside 1	1.341	2.3754	2.1411	1.1568	1.1218e-16	4.1127	0.004943	0.038544		5.21_581.331	1.2743	-0.1671	-0.43129	-1.247	2.9606e-17	3.7604	0.0074257	0.043033
5.5_474.365	-1.4777	-6.5226e-17	-5.2574	1.5007e-06	1.0923e-05	5.009												2.67_149.084	1.5654	2.1049	2.1399	1.9793	4.0708e-17	3.7102	0.0088041	0.046038		1.57_253.058	0.5185	-0.25416	-0.44698	-2.1214	-3.7933e-17	4.6565	0.0019676	0.04236
1.89_475.017	-1.4761	1.0177e-17	-5.2497	1.5465e-06	1.1164e-05	4.9804												3.32_544.176	1.8004	1.6271	2.1382	2.4079	1.8596e-16	4.1417	0.0047421	0.038544		3.29_832.313	-0.99328	0.17298	-0.45133	-2.0256	-5.2736e-17	3.5234	0.010581	0.047876
2.28_606.124	-1.4759	8.0954e-18	-5.2487	1.5525e-06	1.1164e-05	4.9767												3.19_502.225	0.57938	1.8493	2.1301	0.52965	-1.9429e-17	3.927	0.0064477	0.040196		5.5_474.365	0.43319	-1.9664	-0.45814	-0.074184	1.8041e-16	3.8804	0.0062096	0.043033
4.19_482.236	-1.4759	-4.811e-17	-5.2484	1.5545e-06	1.1164e-05	4.9755												3.32_468.159	1.6033	2.0075	2.1246	1.9824	0	3.5555	0.011005	0.049453		6.14_582.326	1.1157	-0.81622	-0.46075	-1.3505	1.9336e-16	3.9805	0.0053497	0.04236
5.59_312.23	1.4758	3.1456e-17	5.248	1.5567e-06	1.1164e-05	4.9741												3.6_320.22	1.086	1.6647	2.1228	2.0837	-3.7007e-17	3.5371	0.011303	0.049997		3.44_354.111	0.7211	0.63213	-0.46536	-1.5826	-1.5266e-17	4.0543	0.0047933	0.04236
2.28_372.105	-1.4757	-2.5073e-16	-5.2473	1.5611e-06	1.1164e-05	4.9714												2.83_328.08	0.66232	1.2972	2.1219	2.2384	-3.9783e-17	4.294	0.0038174	0.038388		6.14_565.338	1.2281	-0.74618	-0.46838	-1.2412	-1.0362e-16	4.026	0.0049993	0.04236
5.4_944.287	-1.4756	7.1702e-18	-5.2468	1.5639e-06	1.1164e-05	4.9697												3.01_173.105	1.202	1.9437	2.1216	2.0437	4.4409e-17	3.6653	0.0093926	0.046687		Coumarin 1	0.4637	-0.55858	-0.47254	-1.89	-1.0732e-16	3.4782	0.01132	0.048897
3.9_462.206	-1.475	-7.4304e-17	-5.244	1.5816e-06	1.1254e-05	4.959												2.9_438.129	0.883	2.0817	2.1209	1.0443	4.7878e-17	3.6323	0.0098506	0.047338		4.73_496.251	0.49265	-0.31631	-0.48809	-1.9605	-4.4929e-17	3.847	0.0065258	0.043033
2.89_426.063	-1.4744	1.0593e-16	-5.2412	1.5986e-06	1.1308e-05	4.9488												3.05_454.142	1.3349	2.3391	2.1141	1.7642	6.0137e-18	3.974	0.0060275	0.039614		3.31_508.103	1.2014	-0.26713	-0.49107	-1.4538	4.1865e-17	4.2216	0.0037392	0.04236
3.57_396.198	-1.4743	1.8504e-17	-5.2405	1.6031e-06	1.1308e-05	4.9462												2.01_882.262	0.74306	2.0638	2.0859	0.58697	6.9389e-18	4.081	0.0051716	0.038586		6.14_505.316	1.1603	-0.81999	-0.50806	-1.3299	1.175e-16	4.1271	0.0043025	0.04236
3.32_430.183	-1.4742	3.9783e-17	-5.2403	1.6046e-06	1.1308e-05	4.9453												3.51_712.256	1.2753	2.0797	2.0807	1.9723	-5.7824e-17	3.6439	0.0096878	0.046894		3.7_410.215	1.474	0.21662	-0.50976	-1.0945	1.1102e-17	4.2367	0.0036567	0.04236
3.29_500.188	-1.4734	-6.8232e-18	-5.2361	1.6309e-06	1.144e-05	4.9298												3.81_504.219	1.074	1.871	2.0791	0.46106	6.6613e-17	3.6114	0.010152	0.047789		1.4_143.058	1.2229	0.30891	-0.51715	-1.4483	7.4015e-18	4.5799	0.0022024	0.04236
3.34_370.184	-1.4733	8.0954e-19	-5.2357	1.6336e-06	1.144e-05	4.9283												4.43_496.25	0.16045	1.5785	2.0679	1.0564	-3.0762e-17	3.6219	0.01	0.047572		Isopropylmalate-like 4	0.61068	-0.089214	-0.52216	-1.7584	-4.3946e-18	3.4938	0.011059	0.048541
3.05_546.135	-1.4726	9.2519e-18	-5.232	1.657e-06	1.1568e-05	4.9147												1.11_303.096	0.96339	1.6073	2.0588	2.2394	6.245e-17	3.8321	0.0073885	0.042239		3.44_342.112	0.88579	0.65065	-0.5317	-1.4704	-1.9984e-16	4.1445	0.0041925	0.04236
1.31_206.079	-1.4713	-1.5387e-16	-5.2257	1.698e-06	1.1811e-05	4.8915												4.11_274.214	0.75656	2.1453	2.0543	0.66715	1.8504e-17	4.1013	0.0050236	0.038544		6.16_607.243	1.2962	-0.64082	-0.54436	-1.2002	3.0531e-17	4.1182	0.0043595	0.04236
2.78_442.168	-1.4711	-9.2519e-18	-5.225	1.7024e-06	1.1811e-05	4.889												3.32_575.106	1.6966	1.3659	2.0404	2.2484	-1.1334e-17	3.587	0.010517	0.048428		6.15_294.218	-0.51786	0.047084	-0.55282	-2.1961	1.6838e-16	3.7578	0.0074551	0.043033
5.74_722.371	-1.4707	-6.4763e-18	-5.2231	1.7155e-06	1.1864e-05	4.8817												1.8_262.015	1.0189	2.383	2.037	1.9314	-3.1456e-17	4.4229	0.0031788	0.038388		6.34_596.295	1.319	-0.50702	-0.56045	-1.2026	6.5688e-17	4.0985	0.004489	0.04236
1.55_310.126	-1.4698	-1.7417e-16	-5.2184	1.7471e-06	1.2025e-05	4.8643												2.55_434.142	0.6196	1.4719	2.0329	-0.016593	-1.4803e-17	3.8033	0.0077001	0.043321		6.14_555.307	0.96367	-0.96557	-0.56207	-1.3814	1.0177e-17	3.7614	0.0074152	0.043033
Homogentisic acid/Hydroxymethoxybenzoic acid glucoside 4	-1.4696	-1.9614e-16	-5.2175	1.7532e-06	1.2025e-05	4.861												2.12_340.027	1.1876	2.3888	2.0221	2.0344	-6.7539e-17	4.3626	0.0034631	0.038388		1.65_633.11	0.88173	-0.78193	-0.58255	-1.5158	-4.1633e-17	3.6264	0.009071	0.045505
2.58_616.109	-1.4696	-5.713e-17	-5.2172	1.755e-06	1.2025e-05	4.86												1.92_400.16	1.3669	1.8828	2.0179	0.28585	2.1279e-17	3.9321	0.0064004	0.040196		0.7_347.062	0.96012	0.34731	-0.58955	-1.7629	1.9822e-16	5.1085	0.0010153	0.04236
3.25_508.187	-1.4687	-2.498e-17	-5.2129	1.785e-06	1.2193e-05	4.8439												5.21_287.246	-0.2515	1.0366	2.0158	1.1944	5.5511e-18	3.9849	0.005934	0.03954		2.45_190.084	1.4858	0.14509	-0.60378	-0.83606	-1.4248e-16	3.7034	0.0080848	0.044044
3.6_456.219	-1.4681	-2.1279e-17	-5.21	1.8048e-06	1.229e-05	4.8334												2_629.198	0.28383	1.6497	2.0094	1.6816	8.743e-17	3.8488	0.0072132	0.041828		1.43_283.092	1.4187	-0.01878	-0.60919	-1.094	-1.9799e-16	4.08	0.0046139	0.04236
3.48_342.144	-1.4678	-3.1456e-17	-5.2085	1.8153e-06	1.2324e-05	4.8279												2.58_616.109	0.41571	2.1584	1.9899	1.2053	-1.8504e-18	4.2061	0.004326	0.038544		6.14_713.268	0.6626	-0.9724	-0.62206	-1.6553	1.8596e-16	3.5549	0.010094	0.047514
3.25_458.197	-1.4674	5.2504e-17	-5.2064	1.8305e-06	1.239e-05	4.8199												2.1_506.123	0.84768	1.5053	1.9861	0.025813	1.2814e-16	3.5385	0.011279	0.049997		6.06_1152.655	1.14	-0.52801	-0.63413	-1.3131	1.8504e-17	3.7882	0.0071238	0.043033
3.48_630.134	-1.4667	2.1077e-16	-5.2034	1.8521e-06	1.2446e-05	4.8088												2.17_252.12	0.9356	2.2319	1.9802	1.3915	0	3.5976	0.010357	0.048244		6.1_724.386	1.3263	-1.0196	-0.6385	-1.036	3.8858e-17	4.5612	0.0022637	0.04236
1.97_316.115	-1.4667	9.5381e-17	-5.2032	1.8529e-06	1.2446e-05	4.8084												1.53_348.106	1.0956	2.1952	1.9766	0.59001	-3.5573e-16	3.9518	0.0062222	0.04009		6.06_1084.67	1.0846	-0.58242	-0.646	-1.4082	5.5511e-18	3.9042	0.0059935	0.043033
3.48_600.212	-1.4666	-1.9891e-17	-5.2029	1.8556e-06	1.2446e-05	4.807												3.45_714.271	1.427	2.1929	1.9727	2.4351	2.3361e-17	4.4915	0.0028849	0.038388		6.06_565.338	1.0366	-0.75505	-0.654	-1.3852	4.0084e-16	3.8217	0.0067766	0.043033
3.95_410.214	-1.4662	3.9089e-17	-5.2005	1.8724e-06	1.252e-05	4.7984												2.02_744.266	0.64849	2.0151	1.9673	1.7394	-1.2953e-17	3.7361	0.0084825	0.045411		6.38_562.334	1.2538	-1.3298	-0.65781	-0.50208	-1.8504e-18	4.298	0.0033391	0.04236
2.91_356.111	-1.4655	-3.7007e-18	-5.1974	1.8956e-06	1.2604e-05	4.7867												3.75_556.179	0.83551	1.9608	1.9639	2.5205	3.7007e-17	5.0737	0.0012744	0.038388		1.31_420.087	0.77149	-0.15924	-0.6727	-1.7102	5.5511e-17	3.8184	0.0068103	0.043033
3.63_458.218	1.4655	2.4431e-17	5.1973	1.8963e-06	1.2604e-05	4.7863												3.25_370.184	1.1191	1.9173	1.9597	0.32155	1.9383e-16	3.674	0.0092764	0.046629		4.8_510.267	0.75484	-0.26026	-0.67918	-1.853	-3.3769e-17	4.2734	0.003463	0.04236
0.7_347.062	1.4651	-7.4015e-18	5.1953	1.9109e-06	1.2606e-05	4.779												2.75_470.008	0.92335	1.2074	1.9528	2.4369	-3.4556e-16	4.1651	0.0045869	0.038544		6.14_649.298	0.9951	-0.85111	-0.67944	-1.3734	-1.6653e-17	3.7687	0.0073346	0.043033
3.22_338.156	-1.465	-3.215e-17	-5.195	1.9129e-06	1.2606e-05	4.778												3.45_668.266	1.3772	2.228	1.9453	2.5468	-1.1102e-16	4.8623	0.0017118	0.038388		2.69_414.173	0.8984	-0.050734	-0.69699	-1.6914	-2.5512e-16	4.2445	0.0036146	0.04236
3.32_544.176	-1.465	2.3685e-16	-5.1949	1.9137e-06	1.2606e-05	4.7777												2.87_577.088	1.5849	1.0596	1.9419	2.4155	4.8572e-17	3.9842	0.0059395	0.03954		5.56_776.246	0.9504	-0.33173	-0.70555	-1.734	1.2953e-16	4.4887	0.0025193	0.04236
3.48_1090.422	-1.4643	-1.2259e-16	-5.1914	1.9401e-06	1.2743e-05	4.7646												1.15_224.035	-0.14554	1.5442	1.9355	1.3529	-6.245e-17	4.2083	0.0043123	0.038544		3.7_456.221	1.1598	-0.11472	-0.70749	-1.3162	-3.5157e-16	3.8576	0.0064237	0.043033
3.32_400.212	-1.4614	4.0246e-17	-5.177	2.0512e-06	1.3432e-05	4.7117												3.7_404.113	1.2928	2.4942	1.9226	1.6253	2.5269e-17	4.0352	0.0055214	0.038856		2.44_414.173	0.60384	0.65408	-0.7092	-1.4379	2.0724e-16	3.597	0.0094774	0.046412
4.59_515.258	-1.4605	2.5327e-17	-5.1726	2.0866e-06	1.3624e-05	4.6954												3.67_505.12	1.5589	1.6897	1.9176	2.6081	-7.2627e-17	4.3397	0.0035775	0.038388		3.31_510.191	0.92474	-0.4364	-0.71409	-1.6194	1.2953e-17	3.9898	0.0052761	0.04236
OH-Tremuloidin-like 1 (FA)	-1.4591	-1.4849e-16	-5.1658	2.142e-06	1.3945e-05	4.6704												3.07_568.142	1.6032	2.5758	1.9151	1.4682	2.7987e-17	4.2113	0.0042942	0.038544		1.58_307.128	0.68314	-0.43997	-0.74099	-1.877	4.0246e-17	4.1374	0.004237	0.04236
2_480.148	-1.4585	4.8179e-16	-5.1632	2.1643e-06	1.4003e-05	4.6606												Acetyl-salicin 2 (2 or 6) (FA)	0.86112	2.3157	1.9031	0.66323	1.7116e-17	4.1798	0.0044917	0.038544		2.82_456.104	0.70649	0.69706	-0.7533	-1.5983	-3.7007e-18	4.5925	0.0021619	0.04236
0.77_94.052	1.4585	-5.6436e-17	5.163	2.1658e-06	1.4003e-05	4.6599												3.1_182.021	0.58201	2.2326	1.8997	1.8116	1.1692e-16	4.369	0.0034315	0.038388		3.76_436.053	0.69409	-1.7311	-0.75795	-0.81433	2.3037e-16	3.7965	0.007037	0.043033
3.27_516.242	-1.4583	-1.0142e-16	-5.162	2.1741e-06	1.4003e-05	4.6563												3.93_580.265	-0.027649	0.80476	1.8898	-0.48904	-8.5695e-17	4.0935	0.0050799	0.038583		3.68_282.017	0.1464	-2.0592	-0.77346	-1.3488	-1.0131e-16	3.889	0.0061302	0.043033
3.42_444.174	-1.4582	-3.7239e-17	-5.1618	2.1762e-06	1.4003e-05	4.6554												2.39_469.142	0.60095	2.1981	1.8898	1.1536	-3.8858e-17	3.7463	0.008359	0.045411		0.84_289.127	0.0086125	0.01772	-0.7815	-2.3282	-9.2519e-18	4.8873	0.0014023	0.04236
3.32_468.159	-1.4575	-2.2204e-17	-5.1582	2.2066e-06	1.4158e-05	4.6422												4.2_420.161	0.55226	0.93224	1.8884	2.3017	1.6653e-16	4.2222	0.0042283	0.038388		6.14_633.324	0.84306	-1.1419	-0.79396	-1.5005	-9.992e-17	4.0644	0.0047221	0.04236
3.05_530.16	-1.4569	2.572e-16	-5.1552	2.2319e-06	1.4247e-05	4.6313												2.72_590.256	1.2886	2.3862	1.8865	2.0565	-1.0813e-17	4.1316	0.0048112	0.038544		1.68_406.069	0.78375	-0.38537	-0.83345	-1.6623	-1.0206e-17	3.7782	0.0072318	0.043033
3.67_505.12	-1.4569	-7.0314e-17	-5.1551	2.2333e-06	1.4247e-05	4.6307												1.51_212.079	1.5093	1.2109	1.8621	2.4799	-1.4433e-16	3.9149	0.0065605	0.040442		0.76_363.058	0.68906	-0.083098	-0.85113	-2.0015	1.2583e-16	4.9943	0.0011993	0.04236
1.89_446.064	-1.4566	-5.3892e-17	-5.1537	2.2448e-06	1.4256e-05	4.6259												4.4_462.244	0.69582	1.0637	1.8581	2.4864	-6.6613e-17	4.523	0.0027591	0.038388		3.14_204.1	0.8977	0.047928	-0.85748	-1.4501	-2.2204e-17	3.6904	0.0082435	0.044248
1.99_453.181	-1.4565	-1.4803e-17	-5.1534	2.2476e-06	1.4256e-05	4.6247												3.32_500.148	1.8105	1.5483	1.8533	2.6818	1.5161e-16	4.5853	0.0025268	0.038388		4.08_464.225	-0.2742	-0.1072	-0.86515	-2.1323	-1.2768e-16	3.4574	0.011679	0.049545
3.05_504.142	-1.4563	-5.4586e-17	-5.1523	2.2577e-06	1.4279e-05	4.6204												4.3_496.25	-0.3095	1.4395	1.8397	1.3032	-1.4803e-17	4.2244	0.0042149	0.038388		1.65_517.142	0.65991	-0.7944	-0.86516	-1.7391	5.7362e-17	3.7762	0.0072531	0.043033
2.51_388.136	-1.4556	7.4477e-17	-5.1491	2.2857e-06	1.4395e-05	4.6087												3.25_396.199	1.3008	2.3324	1.829	2.1143	-7.9566e-17	4.0306	0.0055578	0.038869		3.7_555.138	0.9218	-0.72334	-0.87669	-1.6176	7.9566e-17	4.276	0.0034498	0.04236
4.16_538.223	-1.4554	-4.5855e-17	-5.1481	2.2943e-06	1.4395e-05	4.6051												0.51_194.079	2.0908	2.1092	1.8279	1.8451	7.4015e-18	3.6074	0.010212	0.047854		6.06_555.308	0.71633	-0.85139	-0.87812	-1.5802	8.4886e-17	3.539	0.010337	0.047818
3.73_166.063	-1.4553	1.1825e-16	-5.1474	2.3004e-06	1.4395e-05	4.6026												0.89_276.094	0.098055	1.8086	1.7984	0.61871	1.0732e-16	3.5929	0.010427	0.048316		1.65_290.1	0.64678	-0.90692	-0.88958	-1.6041	-1.6653e-17	3.4441	0.011912	0.049786
3.48_590.195	-1.4552	1.7417e-16	-5.1471	2.3033e-06	1.4395e-05	4.6014												0.72_225.031	1.493	1.9874	1.795	2.3415	-6.6613e-17	3.7631	0.0081584	0.044688		6.06_505.317	0.94564	-0.78115	-0.89619	-1.4113	-6.2913e-17	3.8322	0.0066719	0.043033
2.4_606.124	-1.455	-1.0755e-17	-5.1458	2.3144e-06	1.4395e-05	4.5968												2.1_428.105	0.19142	2.0438	1.7858	0.13358	-2.2112e-16	4.785	0.0019078	0.038388		3.85_368.204	0.7316	0.28403	-0.9097	-1.4226	1.8504e-17	3.486	0.01119	0.048815
2.34_322.126	-1.455	-2.62e-16	-5.1458	2.3149e-06	1.4395e-05	4.5966												4.45_389.825	0.16839	0.97008	1.7829	2.1925	3.4139e-16	4.4117	0.0032299	0.038388		3.48_466.204	0.76279	-1.2238	-0.92264	-1.4769	-2.313e-17	3.9603	0.0055125	0.04236
Salicyl aldehyde/Benzoic acid 1	-1.4543	1.138e-16	-5.1423	2.3464e-06	1.455e-05	4.5837												Pyrogallol	1.6562	1.6596	1.7587	0.045318	1.966e-17	3.8622	0.0070757	0.041378		1.65_336.106	0.84788	-0.93656	-0.92664	-1.5891	-4.7555e-16	4.1637	0.004075	0.04236
4.53_515.257	-1.454	-2.9895e-17	-5.1409	2.3587e-06	1.4573e-05	4.5788												5.9_502.397	0.77202	0.76249	1.7586	2.363	-2.8449e-17	4.014	0.0056918	0.039202		3.44_534.173	0.38879	0.14453	-0.94712	-1.889	1.4618e-16	4.0995	0.0044822	0.04236
2.82_456.104	1.4537	3.932e-17	5.1397	2.3702e-06	1.4573e-05	4.5741												2.41_402.075	0.27374	0.95827	1.7287	2.0866	7.4015e-18	3.7073	0.0088419	0.046077		3.47_478.074	1.1951	0.28359	-0.95109	-0.83444	-4.3021e-17	3.447	0.011861	0.049786
2.76_324.142	-1.4536	2.1678e-16	-5.1391	2.3758e-06	1.4573e-05	4.5719												4.13_714.381	0.19094	1.6875	1.7151	2.0361	1.8504e-17	4.2739	0.0039279	0.038388		6.06_649.298	0.67305	-1.0568	-0.95337	-1.5874	9.2519e-19	3.7075	0.008036	0.044044
5.44_474.131	-1.4534	-2.6368e-17	-5.138	2.3852e-06	1.4573e-05	4.5681												2.57_296.053	0.29023	1.414	1.6932	2.2428	8.0029e-17	4.2527	0.0040485	0.038388		2.76_208.057	0.57724	-0.15566	-0.95895	-1.6845	-1.3323e-16	3.4947	0.011045	0.048541
1.6_352.1	-1.4534	2.2667e-17	-5.138	2.3858e-06	1.4573e-05	4.5679												4.09_512.244	-0.64545	1.16	1.6907	0.63718	3.7007e-18	3.9495	0.0062425	0.04009		6.06_582.326	0.82538	-0.84051	-0.96472	-1.5753	2.1279e-16	3.9858	0.0053074	0.04236
2.44_414.173	-1.4531	6.7307e-17	-5.1368	2.3965e-06	1.4573e-05	4.5637												3.34_434.121	1.2536	2.3878	1.6743	0.93978	-1.2351e-16	3.5579	0.010967	0.049453		1.65_541.1	0.56468	-1.3244	-0.97646	-1.7453	-3.5157e-17	4.1981	0.0038719	0.04236
Prodelphinidin dimer 6	-1.4531	-1.5381e-17	-5.1368	2.3965e-06	1.4573e-05	4.5636												1.28_391.096	1.1874	0.70038	1.6489	2.4752	-6.4763e-18	4.104	0.0050044	0.038544		2.29_346.125	0.58216	-0.89056	-0.98088	-1.7278	1.027e-16	3.6686	0.0085161	0.044364
3.05_538.202	-1.453	-1.5266e-17	-5.1362	2.4026e-06	1.4573e-05	4.5612												3.13_328.08	1.1904	0.89127	1.6191	2.5633	-8.4192e-17	4.16	0.0046201	0.038544		6.27_541.336	0.68917	-1.4342	-0.99253	-1.2661	1.2646e-16	3.7445	0.0076046	0.043033
2_434.142	-1.4524	-1.7029e-16	-5.1332	2.4303e-06	1.4701e-05	4.5504												4.1_614.219	-0.1186	1.4266	1.6173	1.6637	7.7253e-17	3.6801	0.0091952	0.046607		1.36_359.089	0.86163	-0.13581	-1.0148	-1.3602	5.6899e-17	3.4551	0.011719	0.049545
1.55_351.099	-1.4521	2.9808e-17	-5.1318	2.4438e-06	1.4742e-05	4.5451												Catechol/Hydroquinone 1	1.0754	2.4218	1.6039	2.0479	-2.2204e-17	4.1759	0.0045166	0.038544		1.65_570.054	0.57572	-1.1643	-1.0188	-1.7929	7.4015e-18	4.1689	0.0040437	0.04236
1.67_304.079	-1.4518	4.1633e-18	-5.1306	2.455e-06	1.4768e-05	4.5407												1.63_549.207	0.19173	1.2281	1.5961	2.0991	-8.0954e-19	3.7434	0.0083931	0.045411		1.55_380.088	0.70549	-1.1236	-1.0276	-1.4491	2.9698e-16	3.6435	0.0088414	0.044949
4.22_436.265	-1.4516	-6.1294e-17	-5.1294	2.4659e-06	1.4768e-05	4.5365												6.12_294.219	-0.27174	0.78447	1.5243	1.8623	-5.181e-17	3.9914	0.0058794	0.0395		1.82_405.011	0.27296	-0.8395	-1.042	-1.9383	-9.7145e-18	3.4671	0.01151	0.049327
3.65_400.211	-1.4516	2.2031e-17	-5.1292	2.468e-06	1.4768e-05	4.5357												3.09_728.252	1.2825	1.5322	1.5238	2.6023	3.3307e-17	4.008	0.0057405	0.039202		5.83_276.208	0.7345	-0.50956	-1.048	-1.5353	1.1472e-16	3.5144	0.010723	0.048125
3.48_610.175	-1.4506	-2.5905e-17	-5.1245	2.5136e-06	1.5e-05	4.5183												0.63_165.907	0.64737	1.1799	1.5221	2.3348	-2.7756e-17	3.5361	0.011319	0.049997		4.67_498.267	0.61149	-0.22756	-1.0542	-1.6439	1.3138e-16	3.5487	0.010188	0.047571
1.83_306.092	-1.4498	-2.6645e-16	-5.1204	2.5533e-06	1.5197e-05	4.5034												1.53_418.068	2.3519	1.7373	1.5194	1.9487	1.5728e-16	3.697	0.0089736	0.046151		6.03_278.223	0.79021	-0.29542	-1.0573	-1.4412	7.8641e-17	3.4638	0.011566	0.049443
2.23_482.163	-1.448	-1.471e-16	-5.1117	2.6401e-06	1.5671e-05	4.4716												0.63_163.91	0.61254	1.2703	1.5088	2.3352	-6.4763e-18	3.5938	0.010413	0.048316		1.26_534.179	1.3358	0.81362	-1.0603	-0.59892	-1.4895e-16	4.5266	0.0023823	0.04236
4.38_338.193	-1.4478	-4.0188e-18	-5.1107	2.6505e-06	1.5691e-05	4.4679												1.74_238.051	0.26397	2.3269	1.4759	1.0403	-1.7659e-16	4.1198	0.0048932	0.038544		2.97_482.105	0.73818	0.11415	-1.0671	-1.5405	1.8874e-16	3.9305	0.0057627	0.043033
Aconitate 2 (cis or trans)	-1.4474	-9.2519e-18	-5.1092	2.6665e-06	1.5744e-05	4.4621												3.83_698.386	-0.24918	1.836	1.4732	0.48643	6.1698e-17	3.826	0.0074537	0.042239		3.27_642.143	1.0938	0.013188	-1.0698	-1.3074	1.0894e-16	4.3092	0.0032843	0.04236
Pinobanksin/Naringenin	-1.4472	-3.0069e-17	-5.1078	2.6804e-06	1.5784e-05	4.4572												1.74_350.085	0.35043	0.19844	1.473	-1.1226	4.1171e-16	3.9777	0.0059954	0.039614		2.77_430.073	0.38989	-0.27454	-1.072	-1.8646	3.1456e-17	3.672	0.0084735	0.044364
1.98_287.103	-1.447	-1.249e-17	-5.107	2.6889e-06	1.5792e-05	4.4542												Arbutin/hydroquinone glucoside-like (FA)	0.29457	1.5821	1.4482	-0.76074	-1.4803e-16	4.7576	0.0019826	0.038388		1.65_555.098	0.64149	-1.0075	-1.0968	-1.7807	2.1187e-16	4.2654	0.0035044	0.04236
3.48_652.167	-1.4462	-1.138e-16	-5.103	2.7305e-06	1.5994e-05	4.4396												3.09_312.085	0.30734	1.7221	1.4099	-0.29096	-2.5443e-18	3.5812	0.010604	0.048491		1.55_310.126	0.56358	-0.3293	-1.1001	-1.7792	1.0593e-16	3.8614	0.0063873	0.043033
3.05_532.137	-1.446	9.2519e-18	-5.1021	2.74e-06	1.6007e-05	4.4363												3.09_682.245	1.094	1.4644	1.3991	2.6242	-2.0817e-17	4.1099	0.0049625	0.038544		1.65_389.017	0.51867	-1.3812	-1.1081	-1.6774	-3.4463e-17	4.0717	0.004671	0.04236
3.93_384.218	-1.4443	1.5728e-17	-5.094	2.8271e-06	1.6473e-05	4.4066												2.13_448.121	0.95568	2.4867	1.3753	1.8213	-7.8641e-17	4.0645	0.0052949	0.038586		0.55_324.036	0.56156	-0.72551	-1.1137	-2.0933	2.0169e-16	4.9773	0.0012294	0.04236
3.48_612.236	-1.4438	5.7362e-17	-5.0914	2.8553e-06	1.6575e-05	4.3971												3.79_336.177	0.59772	1.7689	1.3578	-0.39207	1.7764e-16	3.7386	0.0084514	0.045411		1.31_306.095	0.24566	-0.45496	-1.1235	-2.0328	-4.7184e-17	3.853	0.0064683	0.043033
2_564.108	-1.4437	-1.3369e-16	-5.091	2.8596e-06	1.6575e-05	4.3957												1.58_426.069	1.0424	1.0322	1.2833	2.5804	-1.2929e-16	3.9407	0.0063218	0.040186		5.96_594.28	0.58906	-1.1007	-1.1348	-1.6154	7.4015e-18	3.761	0.0074195	0.043033
2.18_438.136	-1.4431	-1.4618e-16	-5.0881	2.8921e-06	1.672e-05	4.385												4.83_338.115	0.00046383	1.652	1.2765	-0.34561	1.0351e-16	3.5717	0.010752	0.048779		6.29_432.227	0.61987	-1.2469	-1.1509	-1.4338	7.2858e-18	3.6652	0.0085594	0.044364
1.66_280.116	-1.4425	6.3607e-18	-5.0853	2.923e-06	1.6855e-05	4.3749												3.64_432.105	0.9393	2.5103	1.258	0.96968	4.8572e-18	3.7356	0.0084889	0.045411		3.7_498.189	0.8018	-0.22835	-1.1527	-1.3625	1.5821e-16	3.4933	0.011067	0.048541
4.09_512.244	-1.4421	6.0253e-17	-5.0833	2.9457e-06	1.6941e-05	4.3675												3.07_730.264	1.1923	1.5602	1.2052	2.5553	3.4463e-17	3.8682	0.0070145	0.041136		5.56_896.267	0.73011	-0.57271	-1.1587	-1.5889	-4.6259e-18	3.8396	0.0065988	0.043033
0.73_194.032	-1.4417	3.932e-17	-5.0814	2.9675e-06	1.7023e-05	4.3605												2.03_310.127	0.42126	1.0317	1.1505	2.4257	9.8995e-17	3.921	0.0065026	0.040417		2.76_300.098	0.37275	-0.25821	-1.1688	-1.8305	-1.5543e-16	3.6676	0.0085291	0.044364
2.72_444.073	-1.441	9.4369e-17	-5.0779	3.0075e-06	1.7208e-05	4.3477												3.04_448.156	0.84481	0.74075	1.1303	2.4212	6.9389e-17	3.5453	0.011169	0.049997		1.65_539.124	0.56836	-0.75571	-1.17	-1.9531	3.4417e-16	4.533	0.0023598	0.04236
0.77_95.037	1.4404	3.2382e-17	5.075	3.041e-06	1.7355e-05	4.3372												3.31_282.075	0.46481	1.4858	1.0681	-0.86372	-6.6613e-17	3.9077	0.0066287	0.040474		1.96_468.146	0.66634	0.12857	-1.1773	-1.5343	6.6613e-17	3.9472	0.0056211	0.042596
2.23_436.158	-1.4399	5.7607e-17	-5.0728	3.0673e-06	1.746e-05	4.3291												4.14_295.851	0.67953	-0.72295	1.0446	1.6729	4.3484e-16	3.9975	0.0058282	0.039284		5.44_474.131	-0.17084	-1.4389	-1.1826	-2.356	-2.0296e-17	4.3374	0.00315	0.04236
3.41_472.213	-1.4395	-6.3607e-18	-5.071	3.0887e-06	1.7499e-05	4.3225												3.07_382.183	1.3005	-0.18801	1.0073	1.9806	-4.6259e-18	3.7933	0.0078116	0.043523		6.06_717.283	0.46642	-1.4635	-1.1858	-1.5521	-2.7756e-17	3.8369	0.0066252	0.043033
2.37_350.121	-1.4395	-7.2164e-17	-5.0709	3.09e-06	1.7499e-05	4.3221												1.66_297.006	1.5245	0.7973	1.0018	2.4367	1.064e-17	3.7415	0.0084163	0.045411		0.54_605.076	0.48391	-0.47434	-1.1945	-1.7516	-9.2519e-18	3.6295	0.0090291	0.04547
Isopropylmalate-like 1	-1.4391	-1.0408e-17	-5.0691	3.1113e-06	1.7575e-05	4.3155												2.76_386.085	0.85424	0.66309	0.9946	2.547	2.4055e-17	4.1185	0.004902	0.038544		5.83_722.371	0.58859	-1.581	-1.2021	-1.4418	-5.3661e-17	4.3057	0.0033014	0.04236
2.31_404.131	-1.4381	2.0123e-17	-5.0642	3.1697e-06	1.786e-05	4.2978												1.89_322.126	1.1445	2.476	0.99261	1.8383	7.4015e-18	4.051	0.0053982	0.038618		1.31_306.107	0.31303	-0.68153	-1.2057	-2.1967	-9.2519e-17	4.6941	0.0018618	0.04236
3.12_520.19	-1.4376	3.3307e-17	-5.0619	3.1982e-06	1.7974e-05	4.2894												1.57_364.096	0.054392	0.63797	0.96725	2.2041	-1.6653e-17	3.6759	0.0092511	0.046615		6.37_481.315	0.89201	-1.358	-1.2088	-0.74982	9.2519e-18	3.9768	0.0053792	0.04236
2.18_343.095	1.4367	1.8272e-17	5.0573	3.2547e-06	1.8246e-05	4.2727												1.21_493.179	0.82234	0.96486	0.94788	-1.3304	-6.8261e-17	4.6497	0.0023074	0.038388		1.31_276.084	0.27187	-0.22696	-1.2174	-2.0528	1.1102e-17	4.328	0.0031944	0.04236
3.17_346.125	-1.4359	1.6838e-16	-5.0534	3.3045e-06	1.8479e-05	4.2583												1.22_1083.054	0.5715	1.1255	0.94095	-1.0976	-3.0878e-17	3.663	0.009424	0.046687		3.13_265.095	-0.20914	-0.64752	-1.2223	-2.2403	1.5358e-16	3.65	0.0087569	0.044772
2_921.194	-1.4346	3.2382e-18	-5.0471	3.3847e-06	1.8879e-05	4.2355												3.09_796.239	1.0795	0.68727	0.92789	2.4648	7.1239e-17	3.7204	0.0086762	0.045702		5.99_539.321	0.70243	-1.5028	-1.2303	-1.1271	-4.0246e-17	4.0507	0.0048195	0.04236
1.08_284.111	-1.4344	-2.7524e-17	-5.0464	3.3949e-06	1.8889e-05	4.2326												3.79_712.366	-1.0669	1.2631	0.87047	0.17358	-1.2953e-16	3.6702	0.0093274	0.046665		3.44_602.16	0.10873	-0.63232	-1.237	-2.1109	1.966e-16	3.858	0.0064204	0.043033
3.65_508.121	-1.4342	-5.5974e-17	-5.0452	3.4095e-06	1.8923e-05	4.2285												Isopropylmalate-like 2	-0.92031	0.83627	0.80031	1.6127	5.9674e-17	4.3785	0.0033855	0.038388		6.36_541.337	0.80931	-1.3437	-1.2502	-0.9306	-1.2953e-16	3.8784	0.0062279	0.043033
3.27_400.212	-1.4338	2.8912e-17	-5.0436	3.4306e-06	1.8948e-05	4.2227												2.87_306.078	-0.22769	1.6102	0.70955	-0.79072	-9.5294e-17	3.9839	0.0059424	0.03954		1.29_280.116	0.85807	-0.2656	-1.2691	-1.2602	-2.4517e-16	3.6638	0.0085771	0.044364
3.05_486.131	-1.4338	6.3838e-17	-5.0436	3.4311e-06	1.8948e-05	4.2226												3.42_406.09	0.64855	2.0574	0.64537	-0.32021	-3.2382e-18	3.8412	0.0072924	0.042074		1.27_345.047	1.0776	-0.53518	-1.2695	-0.87657	1.4803e-17	3.7415	0.0076383	0.043033
3.25_440.189	-1.4336	-2.5605e-16	-5.0427	3.4423e-06	1.8957e-05	4.2195												6.14_717.282	-0.67613	-1.0476	0.58366	1.259	-2.5535e-16	4.0459	0.0054378	0.03866		3.34_370.184	0.50102	-0.44005	-1.2704	-1.733	4.0708e-17	3.7639	0.0073866	0.043033
Catechol/Hydroquinone 4	-1.4335	-2.4656e-16	-5.0422	3.4498e-06	1.8957e-05	4.2174												1.22_524.104	0.37573	1.4184	0.55503	-1.2149	-8.3267e-17	4.3442	0.0035546	0.038388		5.83_551.319	0.83322	-0.67548	-1.2839	-1.4776	-1.9602e-17	4.1678	0.0040502	0.04236
3.48_638.183	-1.433	9.4253e-17	-5.0398	3.4816e-06	1.9057e-05	4.2087												1.22_378.024	0.35717	1.3801	0.54764	-1.2339	-8.4423e-18	4.2755	0.0039191	0.038388		5.87_503.3	0.28319	-1.7639	-1.2916	-1.4828	-2.313e-17	3.9084	0.0059557	0.043033
4.45_389.825	1.4329	-1.1102e-17	5.0393	3.4886e-06	1.9057e-05	4.2068												3.52_408.199	-0.49465	0.82464	0.53158	-1.4706	-2.313e-17	3.7852	0.0079037	0.043523		6.1_628.306	0.18907	-2.0466	-1.2942	-0.93073	-1.2583e-16	3.9016	0.0060162	0.043033
4.4_462.244	-1.4328	-1.1889e-16	-5.0387	3.4963e-06	1.9057e-05	4.2047												Salicin 1	0.51851	2.2474	0.50651	0.14599	-7.7716e-17	3.7355	0.0084891	0.045411		5.34_914.277	0.080434	-0.55163	-1.3045	-2.1695	6.9389e-18	4.1401	0.0042202	0.04236
4.25_536.221	-1.4327	2.4749e-17	-5.0382	3.5023e-06	1.9057e-05	4.203												2.8_386.082	0.40843	0.27092	0.48873	2.4641	6.4763e-18	4.6979	0.002156	0.038388		5.29_460.153	-0.070995	-0.56494	-1.3064	-2.2387	-1.212e-16	4.0573	0.0047719	0.04236
2.04_271.051	-1.4322	2.3037e-16	-5.0357	3.5361e-06	1.9194e-05	4.1939												1.33_324.106	-0.62103	-0.12109	0.47942	1.8012	1.4803e-17	3.9356	0.0063686	0.040186		5.29_636.155	0.07242	-0.27305	-1.3193	-2.0301	2.2019e-16	3.8866	0.0061523	0.043033
4.8_510.267	-1.4319	-3.5649e-17	-5.0344	3.5537e-06	1.9242e-05	4.1892												6.14_633.324	-0.70507	-0.98533	0.45607	1.203	-5.181e-17	3.5438	0.011194	0.049997		5.13_914.277	-0.16163	-0.17686	-1.3311	-2.0898	-1.5728e-17	3.8171	0.0068237	0.043033
3.22_568.215	-1.4314	-2.4439e-16	-5.032	3.5865e-06	1.9328e-05	4.1805												1.22_118.063	0.12558	1.2095	0.42211	-1.4473	1.8041e-17	4.4232	0.0031776	0.038388		5.88_543.256	0.54172	-1.5894	-1.3381	-1.1336	-7.494e-17	3.8824	0.0061908	0.043033
3.13_382.183	-1.4314	-2.3939e-17	-5.032	3.587e-06	1.9328e-05	4.1803												2.77_588.113	0.81717	0.43709	0.40438	-1.4933	6.1987e-17	3.7161	0.0087306	0.045769		5.29_520.209	0.14829	-0.51726	-1.3489	-2.1905	-5.5511e-17	4.4853	0.0025319	0.04236
3.05_514.142	-1.4311	2.7293e-17	-5.0308	3.6041e-06	1.9373e-05	4.1758												3.58_408.199	-0.44673	0.93935	0.38474	-1.4218	5.3198e-17	3.6399	0.0097438	0.047042		6.11_560.319	0.13747	-1.9995	-1.3519	-1.1484	4.6259e-17	3.8005	0.0069949	0.043033
4.26_538.172	-1.4301	4.3368e-17	-5.0256	3.6763e-06	1.9713e-05	4.157												1.22_102.032	0.2337	1.2742	0.38291	-1.4372	-1.2432e-16	4.6005	0.0024732	0.038388		Caffeoyl glucose 2	0.066972	-0.1874	-1.364	-1.923	-2.0354e-17	3.6915	0.0082306	0.044248
0.73_406.035	-1.4298	-8.0954e-18	-5.0242	3.6958e-06	1.977e-05	4.1519												1.22_162.053	0.18674	1.2436	0.37113	-1.4051	-4.0523e-16	4.3178	0.0036905	0.038388		5.85_594.28	0.31465	-0.91814	-1.364	-1.7892	1.249e-17	3.5657	0.0099311	0.047384
1.61_312.142	-1.429	-5.5511e-18	-5.0203	3.7509e-06	2.0017e-05	4.1379												1.15_422.141	0.065981	1.2142	0.34353	-1.2864	6.0137e-17	3.6909	0.0090526	0.046175		5.87_563.322	0.26786	-1.6049	-1.3658	-1.4417	-5.8634e-17	3.5325	0.010437	0.047818
2.6_389.976	-1.4286	9.7145e-18	-5.0184	3.7785e-06	2.0088e-05	4.1309												1.22_164.058	0.10349	1.2373	0.31664	-1.4541	-4.1633e-17	4.4469	0.0030727	0.038388		4-hydroxyacetophenone fragment 1	-0.29367	-1.5532	-1.3712	-2.23	-3.8627e-17	3.8789	0.0062232	0.043033
4.06_200.105	1.4285	-1.8966e-17	5.0182	3.7824e-06	2.0088e-05	4.13												3.2_588.114	-0.20729	1.3602	0.29067	-1.226	-1.0293e-17	4.0368	0.0055092	0.038856		5.29_634.16	-0.017741	-0.40543	-1.3731	-2.056	-4.1633e-17	3.7359	0.0077027	0.043033
2.89_526.168	-1.4283	2.3621e-17	-5.0173	3.7946e-06	2.0105e-05	4.1269												1.22_346.088	0.20004	1.1656	0.28335	-1.5458	4.1633e-18	4.6271	0.0023821	0.038388		2.73_364.116	0.18766	-0.59679	-1.3771	-2.0333	-1.2583e-16	3.9997	0.0051992	0.04236
2.61_308.089	-1.4266	1.8272e-17	-5.0089	3.9184e-06	2.0712e-05	4.0964												3.48_652.167	0.78106	0.50917	0.27053	2.2647	4.996e-17	3.5736	0.010721	0.048779		2.77_588.113	-0.11855	-0.28985	-1.3806	-2.0384	1.2768e-16	3.6293	0.0090316	0.04547
Deoxyhexopyranose 3	-1.4256	-6.777e-17	-5.0046	3.984e-06	2.1008e-05	4.0806												1.22_100.052	0.19513	1.1269	0.23754	-1.4878	1.5913e-16	4.1914	0.0044179	0.038544		5.29_661.179	-0.092631	-0.42277	-1.3986	-2.1461	-5.4586e-17	3.9287	0.0057786	0.043033
2.73_562.144	-1.4255	-3.7875e-17	-5.0037	3.9966e-06	2.1025e-05	4.0776												2.81_344.11	-0.14665	0.14767	0.2161	-2.0323	-4.996e-17	4.1686	0.004564	0.038544		2.74_314.1	0.36411	-0.69144	-1.4112	-1.8832	3.2196e-16	4.0285	0.0049813	0.04236
3.43_415.975	-1.4253	6.8001e-17	-5.0029	4.0098e-06	2.1044e-05	4.0745												3.48_606.168	1.1199	0.81887	0.21001	2.2649	-1.323e-16	3.654	0.0095468	0.046743		3.13_454.057	0.37471	-0.24353	-1.4115	-1.7542	3.6175e-16	3.8951	0.0060744	0.043033
3.32_518.158	-1.4241	-9.3212e-17	-4.997	4.1005e-06	2.147e-05	4.0533												6.06_713.268	-0.74878	-1.5109	0.20948	0.80929	-2.3107e-16	3.6986	0.0089523	0.046151		3.25_370.184	0.58712	-0.023479	-1.4215	-1.4462	6.6613e-17	3.8521	0.006477	0.043033
2.4_412.996	-1.4237	-5.0423e-17	-4.9953	4.128e-06	2.1563e-05	4.0469												0.58_189.064	-1.1619	0.98719	0.19629	-1.242	-1.4988e-16	4.2367	0.0041416	0.038388		5.29_478.162	-0.015498	-0.47769	-1.4262	-2.1564	-1.8504e-18	4.1177	0.0043625	0.04236
3.64_482.089	-1.4217	1.3276e-16	-4.9859	4.2788e-06	2.2298e-05	4.0128												3.29_832.313	0.18183	1.0391	0.18406	-1.5367	1.1102e-17	4.0854	0.0051389	0.038586		0.73_275.98	-0.34982	-2.2754	-1.4326	-1.4403	-1.966e-17	3.8318	0.0066759	0.043033
2.87_418.157	-1.4212	-7.1702e-18	-4.9836	4.3162e-06	2.244e-05	4.0046												6.14_713.268	-0.46254	-1.294	0.18111	1.2439	2.0539e-16	4.0013	0.0057963	0.039284		3.09_326.156	0.21067	-0.6615	-1.433	-2.1368	-1.2953e-17	4.5081	0.0024481	0.04236
4.26_528.274	-1.4201	-5.5511e-18	-4.9783	4.4048e-06	2.2847e-05	3.9853												6.14_701.312	-0.41849	-1.2467	0.17469	1.2272	-9.807e-17	3.7236	0.0086359	0.045702		1.24_320.075	0.17204	-0.96753	-1.4331	-1.9534	-1.1889e-16	3.7737	0.0072803	0.043033
1.02_143.058	-1.4194	-1.323e-16	-4.9747	4.4662e-06	2.3112e-05	3.9721												1.22_362.056	0.14616	1.083	0.16085	-1.6022	-2.0817e-18	4.4922	0.0028821	0.038388		2.77_310.127	0.29015	-0.56138	-1.4351	-1.9243	5.4586e-17	4.0288	0.0049788	0.04236
3.13_730.267	-1.4192	5.5511e-18	-4.9737	4.4824e-06	2.3142e-05	3.9687												0.56_370.111	1.1674	-0.17956	0.13659	-1.528	-1.8504e-18	4.3985	0.0032911	0.038388		0.8_129.043	-0.043835	-0.82926	-1.4378	-2.4666	-3.3307e-17	5.1039	0.0010221	0.04236
1.31_420.087	-1.4189	-1.774e-16	-4.9724	4.504e-06	2.3199e-05	3.9641												2.31_404.131	-0.29533	0.69896	0.13507	-1.7375	1.6653e-17	3.8275	0.0074372	0.042239		5.29_712.176	-0.038678	-0.5047	-1.443	-2.1268	-1.2814e-16	3.9641	0.005482	0.04236
3.57_145.053	1.4187	3.5359e-17	4.9714	4.522e-06	2.3238e-05	3.9603												3.76_436.053	0.46545	-1.573	0.081971	0.75883	9.3328e-17	3.7339	0.0085092	0.045411		4-hydroxyacetophenone fragment 2	0.17802	-0.89259	-1.4453	-1.9424	-1.2756e-16	3.7564	0.0074708	0.043033
3.12_574.178	-1.4179	-9.4253e-17	-4.9677	4.5855e-06	2.351e-05	3.9471												2.83_380.167	-0.78118	0.58729	0.076525	-1.7128	-2.7756e-17	3.6854	0.0091252	0.046431		5.74_582.188	0.14719	-0.91079	-1.4522	-1.9047	-4.2096e-17	3.5804	0.0097165	0.046765
0.73_112.016	-1.4178	1.3184e-17	-4.9671	4.596e-06	2.351e-05	3.9449												3.48_638.183	0.70978	0.49102	0.057693	2.2608	-1.0038e-16	3.9085	0.0066204	0.040474		2.76_409.043	0.22956	-0.91718	-1.4547	-1.9231	1.4803e-16	3.8618	0.0063841	0.043033
2.97_452.226	-1.4172	-3.2382e-17	-4.9643	4.6454e-06	2.3678e-05	3.9348												3.29_118.042	0.5305	0.382	0.049019	-1.701	-1.8596e-16	3.6701	0.0093285	0.046665		1.65_404.057	-0.25652	-1.321	-1.4557	-2.48	1.3508e-16	4.6991	0.001848	0.04236
2.91_340.172	-1.4171	8.211e-18	-4.9641	4.6503e-06	2.3678e-05	3.9338												4.06_200.105	-0.45877	-1.4539	0.0091255	1.1767	-1.0848e-16	4.2306	0.0041778	0.038388		5.29_620.164	-0.21635	-0.53741	-1.4605	-2.2166	1.0917e-16	3.9331	0.0057405	0.043033
4.73_496.251	-1.4168	5.6899e-17	-4.9627	4.674e-06	2.3744e-05	3.929												1.5_190.048	-0.13397	0.79543	-0.0058593	-1.6579	-9.2519e-19	3.6484	0.0096252	0.046796		5.27_568.172	-0.12959	-0.75737	-1.462	-2.4279	4.6259e-18	4.7828	0.0016345	0.04236
5.17_614.177	-1.4166	-4.0708e-17	-4.9615	4.6958e-06	2.3801e-05	3.9245												Deoxyhexopyranose 1	0.0038265	-0.1079	-0.041806	-2.084	-5.4586e-17	3.8795	0.0069019	0.040897		2.77_380.089	0.17455	-0.77179	-1.4694	-2.0936	-5.5511e-17	4.28	0.0034293	0.04236
3.71_366.188	-1.4159	-1.249e-17	-4.9584	4.7523e-06	2.4032e-05	3.9132												6.16_607.243	-0.64387	-0.13762	-0.10173	1.9296	-4.4872e-17	4.7534	0.0019942	0.038388		5.29_598.184	-0.10808	-0.59103	-1.4729	-2.2011	2.8773e-16	4.0632	0.0047306	0.04236
3.82_700.272	-1.4147	2.4633e-17	-4.9527	4.8553e-06	2.4497e-05	3.8928												1.21_282	0.39894	-0.042719	-0.10456	2.2976	7.0314e-17	5.0738	0.0012741	0.038388		Salirepin 2	0.084948	-0.47596	-1.4763	-2.0309	-1.0246e-16	3.992	0.0052586	0.04236
1.84_306.081	-1.4141	-3.1907e-16	-4.9498	4.9105e-06	2.4719e-05	3.8821												3.48_592.173	0.53493	0.23039	-0.15142	2.0455	-9.0206e-17	3.5559	0.010999	0.049453		2.8_415.033	-0.17768	-2.0915	-1.4777	-0.4692	1.2212e-16	3.6629	0.0085891	0.044364
1.8_262.015	-1.4128	1.7275e-17	-4.9438	5.0225e-06	2.5131e-05	3.8607												6.37_481.315	-0.86102	-1.325	-0.17669	1.1121	1.3936e-17	4.0091	0.0057314	0.039202		5.88_475.269	0.4483	-1.5331	-1.479	-1.2085	1.3369e-16	3.7947	0.0070552	0.043033
Arbutin/hydroquinone glucoside-like (FA)	-1.4128	-7.6212e-17	-4.9436	5.0263e-06	2.5131e-05	3.86												3.48_636.202	0.59722	0.28924	-0.19621	2.1045	3.7915e-16	3.8562	0.0071364	0.041616		5.87_631.308	0.14251	-1.7014	-1.4923	-1.4106	-6.4763e-17	3.525	0.010554	0.047855
3.12_584.21	-1.4127	4.2327e-17	-4.9431	5.0373e-06	2.5131e-05	3.8579												3.75_210.042	0.67293	-1.1273	-0.28724	1.1747	-3.4694e-18	3.5793	0.010634	0.048521		Phenol fragment 7	-0.10841	-0.47918	-1.5061	-2.1343	4.4872e-17	3.9797	0.0053561	0.04236
4.59_490.236	-1.4127	-6.43e-17	-4.9431	5.0375e-06	2.5131e-05	3.8579												3.77_578.201	-0.61461	0.93416	-0.2956	-1.584	-2.1742e-17	3.8769	0.0069277	0.040897		2.69_316.094	0.11781	-0.37426	-1.5294	-1.8561	1.2212e-16	3.704	0.0080782	0.044044
3.05_561.09	-1.4124	3.5273e-17	-4.9416	5.0657e-06	2.5215e-05	3.8526												3.48_720.152	0.84705	-0.29957	-0.30038	1.8581	-1.0917e-16	4.0256	0.0055981	0.038869		2.69_526.168	0.25164	-0.050684	-1.5312	-1.5149	-6.8464e-17	3.4413	0.011963	0.049905
3.78_334.164	-1.4122	5.8749e-17	-4.941	5.077e-06	2.5215e-05	3.8505												1.16_254.004	0.29032	-1.0643	-0.36263	1.5408	-1.0906e-16	4.3591	0.0034804	0.038388		5.29_698.084	-0.43243	-1.1422	-1.5834	-2.2819	3.5128e-17	3.7064	0.0080494	0.044044
4.17_470.236	-1.4119	-7.575e-16	-4.9394	5.1072e-06	2.5308e-05	3.8448												2.12_349.101	-0.6251	1.3909	-0.38636	-0.97954	1.478e-16	3.8795	0.0069016	0.040897		4.17_464.225	-0.5607	-0.9604	-1.592	-2.3529	-2.0354e-17	3.7663	0.0073608	0.043033
1.89_492.069	-1.4114	-9.5294e-17	-4.9371	5.1537e-06	2.5482e-05	3.8362												1.61_320.111	0.52774	1.9788	-0.38702	0.63324	1.249e-16	3.6919	0.0090392	0.046175		2.22_344.111	-0.2382	-0.82493	-1.6008	-2.1594	5.5511e-18	3.7368	0.0076916	0.043033
5.66_310.215	1.4113	-2.7756e-17	4.9364	5.1669e-06	2.549e-05	3.8338												0.55_550.173	-0.29826	-0.29446	-0.40639	1.8733	1.6653e-17	4.3704	0.0034248	0.038388		5.8_475.269	0.088155	-1.7896	-1.6103	-1.7368	-9.3212e-17	4.3018	0.0033206	0.04236
3.09_444.087	-1.4106	-7.4015e-18	-4.9331	5.2312e-06	2.575e-05	3.8221												1.63_202.046	-0.15121	-2.2179	-0.75956	-0.38279	-2.8681e-17	3.6496	0.0096077	0.046796		1.65_334.09	0.14981	-0.94027	-1.611	-2.1622	-5.9212e-17	4.714	0.001808	0.04236
2.45_190.084	-1.41	2.0539e-16	-4.9303	5.2874e-06	2.5969e-05	3.8119												1.59_538.123	-0.80301	-0.89614	-0.86775	-2.8086	-1.2438e-16	5.3317	0.00089123	0.038388		6.11_550.291	0.12882	-1.7946	-1.612	-1.2009	-1.175e-16	3.6783	0.0083933	0.044364
3.32_528.161	-1.4093	6.1062e-17	-4.9273	5.3487e-06	2.6212e-05	3.801												3.63_490.203	0.87089	-1.1513	-0.8739	-1.3671	3.3307e-17	3.999	0.0058156	0.039284		5.74_722.371	0.089275	-1.6253	-1.6167	-1.8349	-4.996e-17	4.2074	0.0038189	0.04236
3.55_718.281	-1.4087	7.494e-17	-4.9246	5.4042e-06	2.6426e-05	3.7912												Coumaroyl quinic acid	0.23132	1.1044	-1.0544	1.0937	-1.0917e-16	3.6545	0.0095398	0.046743		5.65_460.152	-0.075734	-0.5791	-1.6202	-2.0424	1.3693e-16	3.8707	0.0062999	0.043033
3.09_312.085	-1.4086	-3.6082e-17	-4.9239	5.4172e-06	2.6431e-05	3.7889												1.55_537.12	-0.83319	-1.0343	-1.1428	-2.8879	2.9606e-17	5.5682	0.00064371	0.038388		2.4_606.124	0.62092	-0.095736	-1.6228	-1.4834	2.313e-19	4.5482	0.0023077	0.04236
1.85_466.131	-1.4073	5.8287e-17	-4.9178	5.5454e-06	2.6997e-05	3.7667												2.58_356.111	-0.82832	-0.057901	-1.152	-2.1743	1.7347e-16	3.6437	0.0096905	0.046894		5.41_568.173	0.12412	-0.42639	-1.6239	-2.1383	-3.4232e-17	4.8471	0.0014874	0.04236
3.07_730.264	-1.4062	7.5865e-17	-4.9125	5.6585e-06	2.7488e-05	3.7475												3.68_282.017	-0.033587	-1.6568	-1.5121	0.17761	-6.8348e-17	3.6985	0.0089548	0.046151		0.73_233.994	-0.54292	-2.1933	-1.6437	-1.6828	5.7362e-17	3.7069	0.0080428	0.044044
1.42_305.112	-1.4055	1.4641e-16	-4.9096	5.7207e-06	2.7716e-05	3.7372												3.58_208.072	-1.4125	-0.86558	-1.5388	0.52031	7.1239e-17	3.6641	0.0094094	0.046687		2.73_640.16	0.23306	-0.19194	-1.6443	-1.6301	-8.8818e-17	3.8056	0.0069414	0.043033
2.78_466.112	-1.4055	-1.4991e-17	-4.9091	5.7305e-06	2.7716e-05	3.7356												3.91_558.24	-0.91071	0.25353	-1.6728	-1.6794	2.2204e-17	3.7875	0.007877	0.043523		2.47_606.124	0.38937	-0.28769	-1.6649	-1.6685	-8.0954e-19	4.2723	0.003469	0.04236
4.11_550.255	-1.4044	-1.3461e-16	-4.9043	5.836e-06	2.8134e-05	3.7182												1.57_220.058	-0.095721	0.50968	-1.6902	-1.3167	1.3415e-16	4.1002	0.0050315	0.038544		5.29_666.169	-0.24706	-0.68171	-1.6651	-2.164	9.807e-17	3.9308	0.0057601	0.043033
3.17_760.277	-1.4044	1.7162e-16	-4.904	5.8423e-06	2.8134e-05	3.7172												1.2_394.118	-0.73884	-2.0978	-1.8281	-2.1031	-8.5117e-17	4.153	0.0046663	0.038544		4.63_170.094	-0.31213	-0.014676	-1.6693	-1.7586	3.3307e-16	3.5342	0.01041	0.047818
3.82_746.276	-1.4013	1.434e-17	-4.8897	6.167e-06	2.9634e-05	3.6659												Benzyl salicylate 1	-0.39325	0.18334	-1.9461	-1.2008	4.0477e-16	3.6003	0.010316	0.048233		1.6_352.1	-0.26436	-0.91968	-1.6827	-2.4339	3.7007e-18	4.7724	0.0016596	0.04236
1.83_691.116	-1.4009	-3.5996e-18	-4.8879	6.21e-06	2.9776e-05	3.6593												6.01_330.196	-0.6207	-0.65419	-2.0913	-1.9829	-1.8781e-16	3.9283	0.0064357	0.040196		1.15_541.061	-0.10924	-0.2196	-1.6932	-1.851	1.0362e-16	3.7948	0.007054	0.043033
6.03_560.319	-1.4001	9.7376e-17	-4.884	6.3019e-06	3.0151e-05	3.6454												0.59_188.079	-0.52733	-1.5232	-2.1627	-2.0002	1.1519e-16	4.1592	0.0046256	0.038544		1.65_288.085	0.025146	-0.92012	-1.6975	-2.2235	5.5511e-17	4.7466	0.0017236	0.04236
1.58_426.069	-1.3999	-2.1464e-16	-4.8832	6.322e-06	3.0183e-05	3.6424												0.51_231.919	-0.77084	-2.1595	-2.2125	-0.94506	-2.7524e-17	4.2749	0.0039225	0.038388		Salicylic acid fragment 8	-0.043243	-0.49123	-1.701	-1.8992	-1.8504e-17	3.7561	0.0074732	0.043033
3.52_408.199	-1.399	-4.4872e-17	-4.8789	6.4261e-06	3.0527e-05	3.6269												0.73_408.012	-0.73966	-1.2808	-2.3627	-0.61105	3.562e-17	3.5878	0.010504	0.048428		5.08_524.282	-0.97275	-0.33485	-1.7037	-2.1369	-2.3592e-16	3.6257	0.0090803	0.045505
1.94_381.163	-1.3989	-1.1889e-16	-4.8783	6.4391e-06	3.0527e-05	3.625												0.82_116.01	-0.52152	-0.26337	-2.3879	-0.42466	-4.7184e-17	4.278	0.0039051	0.038388		3.11_296.147	0.23446	-1.0691	-1.7051	-1.7199	-1.6283e-16	3.9046	0.0059891	0.043033
3.72_132.079	-1.3988	2.1048e-17	-4.8782	6.4433e-06	3.0527e-05	3.6243												0.73_422.005	-1.0646	-1.2364	-2.6389	-1.4012	6.1294e-18	4.148	0.0046999	0.038544		1.15_663.107	-0.0483	-0.43538	-1.7331	-1.9007	1.8504e-17	3.8814	0.0062003	0.043033
2_600.093	-1.3988	-4.5161e-17	-4.8779	6.4501e-06	3.0527e-05	3.6233												3.29_585.205	-1.0133	-1.4694	-2.718	-1.0951	1.1657e-16	4.5947	0.0024934	0.038388		1.62_430.042	0.47446	-0.71193	-1.741	-1.6182	-3.141e-16	4.4031	0.0028585	0.04236
3.09_393.09	-1.3987	-1.1628e-16	-4.8774	6.463e-06	3.0527e-05	3.6214												0.73_229.977	-1.076	-1.3374	-2.733	-1.242	-1.101e-16	4.5192	0.002774	0.038388		0.73_290.944	-0.69455	-2.4413	-1.751	-1.5556	-3.2382e-17	4.169	0.0040426	0.04236
Citric acid	-1.3979	-6.8487e-16	-4.8736	6.5552e-06	3.0897e-05	3.608																						4.56_436.231	-0.010737	-1.6487	-1.7533	-1.7879	1.7949e-16	4.1033	0.0044568	0.04236
2.87_428.189	-1.3977	3.5037e-16	-4.8729	6.5719e-06	3.091e-05	3.6056																						Salicylic acid glucoside 1	0.14246	-0.27207	-1.7564	-1.5758	-6.4763e-18	3.6777	0.0084013	0.044364
2_579.064	-1.3969	1.8966e-17	-4.8689	6.6719e-06	3.1314e-05	3.5913																						5.29_696.08	-0.36443	-0.93705	-1.7657	-2.2427	-3.1086e-16	4.0204	0.0050415	0.04236
Tremuloidin 1 (FA)	-1.3965	1.0848e-16	-4.8671	6.7177e-06	3.1463e-05	3.5848																						5.4_944.287	-0.1571	-0.68561	-1.7698	-1.9334	-3.9783e-17	3.6329	0.0089834	0.045436
4.32_396.234	-1.3961	2.4517e-17	-4.8655	6.7582e-06	3.1585e-05	3.5791																						6.1_577.309	-0.14009	-1.8841	-1.7788	-0.8503	1.9244e-16	3.4931	0.01107	0.048541
4.13_496.215	-1.396	1.2027e-17	-4.865	6.7731e-06	3.1589e-05	3.577																						0.73_327.948	-0.82717	-2.3633	-1.8023	-1.7767	1.2814e-16	4.0063	0.005148	0.04236
1.26_314.121	-1.3952	2.5443e-17	-4.8614	6.8648e-06	3.1949e-05	3.5642																						1.24_666.068	-0.13413	-1.6163	-1.8024	-2.0299	-1.7579e-16	4.3632	0.0030324	0.04236
3.48_688.161	-1.3947	-3.0069e-17	-4.859	6.9277e-06	3.2139e-05	3.5556																						5.8_543.256	-0.11751	-1.9583	-1.8073	-1.6007	-1.7949e-16	4.2187	0.0037557	0.04236
3.43_288.063	-1.3947	-2.3708e-17	-4.8587	6.9345e-06	3.2139e-05	3.5547																						Salicylic acid fragment 1	0.23819	-0.16894	-1.8099	-1.5459	3.8858e-17	4.1183	0.0043587	0.04236
1.02_101.048	-1.3945	-7.5171e-17	-4.8581	6.95e-06	3.2144e-05	3.5526																						Salicylic acid glucoside 1 (FA)	0.20097	-0.14258	-1.8186	-1.5143	3.0531e-17	4.0166	0.0050699	0.04236
3.15_466.111	-1.3942	2.6368e-16	-4.8565	6.9925e-06	3.2259e-05	3.5468																						1.24_634.13	-0.0063055	-1.419	-1.8232	-1.9817	-2.0123e-16	4.4021	0.0028628	0.04236
0.91_240.067	-1.3941	8.2342e-17	-4.8561	7.004e-06	3.2259e-05	3.5452																						5.78_631.307	-0.43087	-1.9666	-1.8365	-1.7599	4.996e-17	3.7741	0.0072758	0.043033
2.87_382.184	-1.3935	1.1033e-16	-4.8533	7.0777e-06	3.2531e-05	3.5353																						2.6_389.976	-0.43502	-2.2309	-1.8408	-1.9116	1.3693e-16	4.6539	0.001975	0.04236
1.65_404.057	-1.3934	-7.4477e-17	-4.8527	7.0931e-06	3.2534e-05	3.5332																						Hypoxanthine-like	-0.64779	-1.2601	-1.8418	-2.5698	7.0314e-17	4.7212	0.0017891	0.04236
3.16_372.106	-1.3932	-3.5157e-17	-4.8517	7.1206e-06	3.2593e-05	3.5296																						5.78_563.322	-0.35032	-1.8888	-1.8457	-1.8746	8.6042e-17	4.0051	0.0051573	0.04236
4.5_496.251	-1.393	7.2396e-17	-4.8508	7.146e-06	3.2642e-05	3.5262																						2.73_526.168	0.04665	-0.52462	-1.8483	-1.8666	4.811e-17	4.2172	0.0037642	0.04236
3.29_652.17	-1.3919	-7.4015e-18	-4.846	7.2751e-06	3.3164e-05	3.5092																						2.87_450.119	0.17379	-0.6086	-1.8647	-1.4735	-7.6328e-18	3.5929	0.0095367	0.046412
4.53_452.262	-1.3918	1.5034e-18	-4.8454	7.2922e-06	3.3173e-05	3.507																						3.07_344.111	-0.076299	-0.5398	-1.8659	-2.0092	8.7893e-17	4.3847	0.0029372	0.04236
3.42_340.173	-1.3909	8.0491e-17	-4.8411	7.4128e-06	3.3607e-05	3.4914																						2.37_381.048	0.062269	-1.2948	-1.8662	-1.4472	-4.811e-17	3.4911	0.011105	0.048541
5.8_543.256	-1.3908	-1.0015e-16	-4.8409	7.4178e-06	3.3607e-05	3.4908																						5.78_503.3	-0.38248	-1.9736	-1.8707	-1.8649	-5.7824e-17	4.1273	0.004301	0.04236
2_472.116	-1.3897	6.3144e-17	-4.8356	7.566e-06	3.4209e-05	3.472																						0.88_331.054	-0.75095	-2.2383	-1.8716	-1.2206	-1.1565e-17	3.5509	0.010154	0.047514
3.57_510.191	-1.389	-1.4861e-16	-4.8326	7.652e-06	3.4527e-05	3.4613																						6.03_560.319	-0.42795	-2.0088	-1.8889	-1.5146	-1.0524e-17	3.6684	0.0085188	0.044364
4.16_523.147	-1.3887	-3.8858e-17	-4.8312	7.6945e-06	3.4643e-05	3.4561																						Coumaric acid 1	-0.60762	-1.3593	-1.8915	-2.4194	-6.1062e-17	4.3629	0.0030334	0.04236
1.89_230.025	-1.3886	-6.2739e-17	-4.8307	7.7089e-06	3.4643e-05	3.4543																						1.24_650.101	-0.058972	-1.5282	-1.9037	-2.0143	-7.1239e-17	4.6382	0.0020212	0.04236
2_522.116	-1.3853	-2.9259e-17	-4.8152	8.172e-06	3.665e-05	3.399																						0.73_194.032	-0.65764	-2.3142	-1.9091	-1.3463	1.434e-17	3.9795	0.0053572	0.04236
1.46_380.041	-1.3847	-1.1692e-16	-4.8127	8.2492e-06	3.6922e-05	3.3901																						0.75_134.058	0.10352	-1.3049	-1.9221	-1.3626	1.0131e-16	3.6432	0.0088462	0.044949
3.88_424.23	-1.3841	7.9797e-17	-4.8096	8.3447e-06	3.7274e-05	3.3792																						Glutathione (GSSG)	-0.10328	-1.5207	-1.9258	-2.0674	-2.0001e-16	4.6909	0.0018705	0.04236
1.65_80.026	-1.3838	-2.313e-18	-4.8085	8.3798e-06	3.7309e-05	3.3752																						0.73_218.024	-0.68541	-2.3755	-1.9313	-0.94103	-9.7838e-17	4.2531	0.0035689	0.04236
2.61_456.03	-1.3838	0	-4.8083	8.3861e-06	3.7309e-05	3.3745																						1.31_369.091	0.042812	-0.058551	-1.951	-1.2315	-1.3878e-16	3.7	0.0081267	0.044053
3.48_621.126	-1.3835	-1.9891e-17	-4.8067	8.4349e-06	3.7451e-05	3.369																						6.38_567.351	-0.20075	-1.5992	-1.9923	-1.867	-7.4015e-18	4.1969	0.0038792	0.04236
1.64_292.086	-1.3825	1.0888e-16	-4.8025	8.5698e-06	3.7974e-05	3.354																						6.03_628.306	-0.69355	-2.2673	-2.0187	-1.4238	-6.5226e-17	4.026	0.0049993	0.04236
3.07_428.188	-1.3823	-2.8218e-17	-4.8013	8.6086e-06	3.807e-05	3.3497																						0.73_406.035	-0.96503	-2.4187	-2.0263	-1.3094	-2.0585e-17	4.0923	0.0045307	0.04236
1.65_476.066	-1.3814	-1.1981e-16	-4.7974	8.7356e-06	3.8555e-05	3.3358																						0.51_231.919	-0.68847	-2.0976	-2.04	-1.972	-1.0177e-16	4.2447	0.0036136	0.04236
1.62_430.042	-1.3811	-1.9284e-17	-4.7958	8.788e-06	3.8709e-05	3.3301																						2.83_282.074	-0.79823	-1.3087	-2.0563	-2.5457	4.8804e-17	4.7799	0.0016413	0.04236
2.85_462.119	-1.3803	1.397e-16	-4.7921	8.9104e-06	3.917e-05	3.317																						0.73_112.016	-0.78678	-2.3478	-2.066	-1.4757	1.1472e-16	4.2182	0.0037585	0.04236
3.67_437.132	-1.3799	-2.5905e-17	-4.7905	8.965e-06	3.9333e-05	3.3112																						2.14_206.079	-0.10795	-1.3509	-2.0704	-1.7418	-1.5589e-16	4.1316	0.0042733	0.04236
1.84_339.095	1.3798	-6.9389e-19	4.79	8.9832e-06	3.9335e-05	3.3093																						Citric acid	-0.89152	-2.3937	-2.0819	-1.504	3.5296e-16	4.2405	0.0036362	0.04236
1.74_202.132	1.3795	6.2681e-17	4.7887	9.0272e-06	3.9394e-05	3.3047																						0.73_436.965	-0.91659	-2.4457	-2.0832	-1.4572	8.4886e-17	4.3481	0.0031008	0.04236
4.26_552.239	-1.3794	4.0061e-16	-4.7882	9.0434e-06	3.9394e-05	3.303																						3.25_330.131	-0.63458	-1.8137	-2.0879	-2.0887	5.7362e-17	4.1819	0.0039662	0.04236
0.73_88.016	-1.3794	6.9389e-18	-4.788	9.05e-06	3.9394e-05	3.3023																						Mevalonic acid 1	-1.0929	-2.2239	-2.0897	-0.97937	-4.0246e-17	3.7372	0.007687	0.043033
5.24_526.296	-1.3785	6.0831e-17	-4.784	9.188e-06	3.9846e-05	3.288																						0.73_86.037	-0.95535	-2.2461	-2.0925	-1.4408	3.7933e-17	3.778	0.007233	0.043033
1.61_445.008	-1.3785	1.1403e-16	-4.7839	9.1896e-06	3.9846e-05	3.2878																						Aconitate 1 (cis or trans)	-1.048	-2.2838	-2.1074	-1.2145	1.0408e-16	3.8253	0.0067405	0.043033
1.65_492.035	-1.3782	5.7362e-17	-4.7826	9.234e-06	3.9935e-05	3.2832																						1.74_142.026	-0.45299	-1.6181	-2.1091	-1.5724	1.7093e-16	3.4929	0.011073	0.048541
3.04_588.113	-1.3781	8.3961e-17	-4.7823	9.2463e-06	3.9935e-05	3.282																						0.73_229.977	-0.79156	-2.2535	-2.1612	-1.9296	1.434e-17	4.5748	0.0022189	0.04236
Procyanidin pentamer 2	-1.378	-3.2873e-17	-4.7815	9.2728e-06	3.9972e-05	3.2793																						2.37_282.131	0.011061	-1.3166	-2.1897	-1.7594	8.8355e-17	4.8455	0.0014909	0.04236
Dehydroquercetin 1	-1.3777	1.8157e-17	-4.7802	9.3181e-06	4.0089e-05	3.2746																						4.11_482.269	0.027456	-1.0411	-2.2038	-1.6297	-5.4586e-17	4.5509	0.0022984	0.04236
4.16_487.225	-1.3774	-6.7539e-17	-4.7788	9.3685e-06	4.0228e-05	3.2695																						0.73_422.005	-0.96791	-2.3043	-2.2185	-1.7545	1.5959e-17	4.3378	0.0031481	0.04236
3.48_606.168	-1.3765	4.6259e-17	-4.7749	9.5064e-06	4.0742e-05	3.2557																						0.55_602.139	-0.43194	-1.7721	-2.2189	-0.51918	4.1171e-17	4.1801	0.0039771	0.04236
5.78_503.3	-1.3762	-5.8287e-17	-4.7731	9.5691e-06	4.0932e-05	3.2494																						1.74_350.085	-0.70076	-1.5862	-2.2757	-1.7003	-1.4248e-16	3.633	0.0089815	0.045436
3.32_500.148	-1.3758	1.7208e-16	-4.7715	9.626e-06	4.1096e-05	3.2438																						0.59_188.079	-1.0414	-1.8096	-2.318	-2.0869	-9.6219e-17	4.073	0.0046623	0.04236
1.58_253.071	1.3755	1.3878e-17	4.77	9.6817e-06	4.1254e-05	3.2384																						0.73_408.012	-0.9672	-2.1148	-2.355	-1.7434	-1.6376e-16	4.2449	0.0036125	0.04236
2.6_577.635	-1.3753	1.7879e-16	-4.7691	9.7147e-06	4.1262e-05	3.2351																						Aconitate 2 (cis or trans)	-0.9582	-1.9957	-2.4207	-1.303	-1.9834e-17	4.0493	0.004829	0.04236
Syringin 2	-1.3752	2.0077e-16	-4.7689	9.7208e-06	4.1262e-05	3.2345																						1.61_445.008	-0.7588	-1.5828	-2.4418	-1.6319	7.2164e-17	3.9603	0.0055126	0.04236
2.76_392.127	-1.375	-1.0564e-16	-4.7676	9.7675e-06	4.1345e-05	3.23																						0.92_189.063	-1.1287	-1.8163	-2.456	-1.8806	1.2351e-16	4.0448	0.0048621	0.04236
Prodelphinidin dimer 1 (A-type)	-1.3749	-6.7307e-17	-4.7674	9.7776e-06	4.1345e-05	3.229																						1_206.042	-0.85649	-1.5517	-2.5751	-1.4851	1.0356e-16	4.1452	0.0041883	0.04236
3.58_476.188	-1.3744	1.8504e-17	-4.7651	9.8607e-06	4.1617e-05	3.221
2.58_356.111	-1.3739	-1.1542e-16	-4.7628	9.9473e-06	4.1903e-05	3.2127
3.34_384.199	-1.3738	4.7184e-17	-4.7622	9.9678e-06	4.191e-05	3.2108
Phenylalanine fr 1	-1.3735	-1.0709e-16	-4.7608	1.002e-05	4.2052e-05	3.2058
Procyanidin dimer 4	-1.3732	3.2382e-18	-4.7594	1.0073e-05	4.2125e-05	3.2009
3.29_432.192	-1.3732	2.4864e-17	-4.7593	1.0076e-05	4.2125e-05	3.2006
3.48_1074.428	-1.3718	-8.6042e-17	-4.7531	1.0315e-05	4.3043e-05	3.1784
2.18_297.089	1.3716	-2.2274e-16	4.7524	1.0342e-05	4.3077e-05	3.1759
3.73_208.073	-1.3714	1.4132e-16	-4.7514	1.0381e-05	4.3155e-05	3.1724
2.87_480.157	-1.3712	-9.3444e-17	-4.7506	1.0411e-05	4.32e-05	3.1696
1.96_468.146	-1.3709	7.5634e-17	-4.7492	1.0466e-05	4.335e-05	3.1646
5.78_563.322	-1.3708	8.7401e-17	-4.7484	1.0496e-05	4.3392e-05	3.1619
Cinnamic acid 2	-1.3704	-1.0339e-16	-4.7469	1.0557e-05	4.3563e-05	3.1564
0.73_218.024	-1.3703	-2.9143e-17	-4.7463	1.0578e-05	4.3568e-05	3.1545
2.87_548.134	-1.3699	6.511e-17	-4.7445	1.0649e-05	4.3655e-05	3.1482
3.48_592.173	-1.3699	-1.6653e-17	-4.7442	1.0661e-05	4.3655e-05	3.1471
3.19_502.225	-1.3698	4.4872e-17	-4.7439	1.0674e-05	4.3655e-05	3.1459
Cinnamoyl glucose 2	-1.3697	5.3198e-18	-4.7436	1.0686e-05	4.3655e-05	3.1449
3.46_588.197	-1.3697	-2.3014e-17	-4.7433	1.0698e-05	4.3655e-05	3.1439
3.13_454.057	-1.3685	1.4109e-16	-4.7379	1.0916e-05	4.4465e-05	3.1247
5.78_631.307	-1.3677	1.057e-16	-4.7343	1.1066e-05	4.4994e-05	3.1118
1.47_222.056	-1.3672	-1.8504e-17	-4.7323	1.1148e-05	4.5242e-05	3.1049
2.87_512.148	-1.3659	-4.5775e-17	-4.7263	1.1398e-05	4.6175e-05	3.0838
2.92_490.168	-1.3651	-5.8981e-18	-4.7225	1.1561e-05	4.6749e-05	3.0704
0.73_86.037	-1.3649	-3.1225e-17	-4.7215	1.1606e-05	4.6846e-05	3.0667
1.89_464.074	-1.364	-1.3589e-16	-4.7174	1.1786e-05	4.7485e-05	3.0521
3_288.157	-1.3625	6.9389e-17	-4.7109	1.2073e-05	4.8555e-05	3.0293
3.46_615.215	-1.3614	5.181e-17	-4.7057	1.2311e-05	4.942e-05	3.0109
3.48_484.212	-1.361	-6.2739e-17	-4.7039	1.2393e-05	4.9662e-05	3.0046
6.03_628.306	-1.3596	-1.5312e-16	-4.6977	1.2684e-05	5.0737e-05	2.9826
3.13_265.095	-1.3592	3.747e-17	-4.6955	1.2784e-05	5.1044e-05	2.9752
Coumaric acid 3	1.3589	3.747e-17	4.6943	1.2843e-05	5.1187e-05	2.9708
0.73_290.944	-1.3586	-9.0206e-18	-4.6929	1.2909e-05	5.1358e-05	2.966
1.31_276.084	-1.3582	-2.6137e-17	-4.6912	1.2993e-05	5.1601e-05	2.9598
1.85_450.996	-1.3572	9.4138e-17	-4.6866	1.3218e-05	5.24e-05	2.9436
3.48_636.202	-1.3565	-2.3095e-16	-4.6834	1.3375e-05	5.2926e-05	2.9325
3.31_282.075	-1.3563	4.0708e-17	-4.6825	1.3418e-05	5.3005e-05	2.9294
5.8_475.269	-1.3547	1.8327e-16	-4.6751	1.3791e-05	5.4134e-05	2.9034
3.41_434.121	-1.3546	-6.3607e-17	-4.6751	1.3794e-05	5.4134e-05	2.9032
1.26_255.077	1.3545	-9.992e-17	4.6745	1.3824e-05	5.4134e-05	2.9012
2.8_462.173	-1.3545	1.7579e-17	-4.6744	1.3829e-05	5.4134e-05	2.9009
2.29_346.125	-1.3544	7.1341e-17	-4.6739	1.3855e-05	5.4134e-05	2.8991
2_548.135	-1.3543	5.2504e-17	-4.6736	1.3872e-05	5.4134e-05	2.8979
Procyanidin pentamer 1	-1.3543	-3.2382e-17	-4.6735	1.3875e-05	5.4134e-05	2.8977
3.72_468.223	-1.3537	4.1633e-17	-4.671	1.4006e-05	5.455e-05	2.8888
6.21_432.227	-1.3536	4.013e-17	-4.6703	1.4041e-05	5.4591e-05	2.8864
2.6_577.133	-1.3534	-9.0206e-18	-4.6694	1.409e-05	5.4684e-05	2.8832
3.42_454.205	-1.353	1.8642e-16	-4.6676	1.4183e-05	5.4915e-05	2.8769
3.13_328.08	-1.3529	-5.181e-17	-4.6673	1.4199e-05	5.4915e-05	2.8759
1.33_400.119	-1.3526	-1.3508e-16	-4.666	1.4267e-05	5.5067e-05	2.8713
2.81_208.071	-1.3526	-2.8357e-16	-4.6656	1.4288e-05	5.5067e-05	2.87
6.07_996.616	1.3522	1.58e-17	4.6641	1.4366e-05	5.5272e-05	2.8648
2.77_294.131	-1.3512	6.0137e-18	-4.6596	1.4609e-05	5.6111e-05	2.8489
1.39_372.066	-1.3505	3.5967e-16	-4.6562	1.4796e-05	5.6655e-05	2.8369
3.03_260.126	-1.3504	4.0014e-17	-4.6561	1.4802e-05	5.6655e-05	2.8365
2_470.119	-1.3503	-4.9266e-17	-4.6553	1.4847e-05	5.673e-05	2.8336
6.06_506.266	-1.3501	-3.1919e-17	-4.6546	1.4885e-05	5.6776e-05	2.8313
4.25_484.252	-1.3494	7.1887e-16	-4.6513	1.5069e-05	5.7186e-05	2.8196
3.52_440.224	-1.3494	-1.5219e-16	-4.6513	1.5069e-05	5.7186e-05	2.8196
3.37_500.246	-1.3494	6.5457e-17	-4.6512	1.5069e-05	5.7186e-05	2.8196
2_550.112	-1.3491	7.0777e-17	-4.6502	1.5126e-05	5.7304e-05	2.816
3.84_384.142	-1.3489	-5.9212e-17	-4.6493	1.518e-05	5.7345e-05	2.8126
4.44_514.262	-1.3489	-1.0813e-17	-4.6491	1.5189e-05	5.7345e-05	2.8121
Homogentisic acid/Hydroxymethoxybenzoic acid glucoside 1	-1.3484	7.9797e-18	-4.6469	1.5312e-05	5.7712e-05	2.8045
3.32_380.168	-1.3482	-1.7347e-18	-4.6461	1.5359e-05	5.7791e-05	2.8016
Salirepin 1	-1.348	1.419e-16	-4.6452	1.541e-05	5.7817e-05	2.7984
0.92_100.016	1.348	3.6082e-17	4.6451	1.5418e-05	5.7817e-05	2.798
3.25_396.199	-1.347	-2.1279e-17	-4.6407	1.5668e-05	5.8618e-05	2.7827
0.73_408.012	-1.347	-7.6328e-17	-4.6404	1.5684e-05	5.8618e-05	2.7818
3.34_434.121	-1.3451	5.0625e-17	-4.6318	1.6194e-05	6.0421e-05	2.7515
3.29_568.215	-1.3446	4.3923e-16	-4.6297	1.6317e-05	6.0746e-05	2.7443
1.65_478.043	-1.3445	5.2736e-17	-4.6294	1.6336e-05	6.0746e-05	2.7433
Cinnamic acid 3	-1.3442	1.6052e-16	-4.628	1.642e-05	6.0958e-05	2.7384
2_497.138	-1.3435	1.434e-16	-4.6246	1.6629e-05	6.1631e-05	2.7264
3.1_304.153	-1.3433	-1.5266e-16	-4.6239	1.6672e-05	6.1652e-05	2.724
1.85_422.044	-1.3432	1.8551e-16	-4.6236	1.6691e-05	6.1652e-05	2.723
2.12_350.02	1.3418	5.3892e-17	4.6173	1.7085e-05	6.3006e-05	2.7008
1.65_97.053	-1.3405	5.0885e-18	-4.6113	1.747e-05	6.4266e-05	2.6798
3.59_392.11	-1.3404	1.3687e-16	-4.6108	1.7502e-05	6.4266e-05	2.6781
3.57_494.123	-1.3403	-4.9729e-17	-4.6106	1.7514e-05	6.4266e-05	2.6774
Salicylic acid glucoside 1	-1.3391	1.0416e-16	-4.6049	1.7885e-05	6.5518e-05	2.6576
Acetyl-salicin	-1.3384	-8.8818e-17	-4.6019	1.8087e-05	6.6122e-05	2.647
Procyanidin dimer 1 (A-type)	-1.3383	1.33e-17	-4.6015	1.8109e-05	6.6122e-05	2.6458
Salicylic acid glucoside 2	-1.3379	-1.1565e-16	-4.5999	1.8217e-05	6.6405e-05	2.6402
3.58_498.23	-1.3374	1.3878e-18	-4.5976	1.8374e-05	6.6868e-05	2.6321
3.6_438.099	-1.3365	-1.3091e-16	-4.5935	1.8649e-05	6.7758e-05	2.6181
4.49_224.105	-1.3364	4.811e-17	-4.5929	1.8693e-05	6.7807e-05	2.6159
1.46_488.173	-1.3362	5.2273e-17	-4.5923	1.8732e-05	6.784e-05	2.6139
3.46_552.22	-1.336	-3.9135e-16	-4.5914	1.8797e-05	6.7964e-05	2.6106
3.52_566.199	-1.3347	-3.6082e-17	-4.5853	1.9222e-05	6.9387e-05	2.5895
3.32_546.153	-1.3344	3.3307e-17	-4.584	1.9316e-05	6.9613e-05	2.5849
2.36_408.084	-1.3341	-7.3899e-17	-4.583	1.9391e-05	6.9768e-05	2.5812
4.65_258.089	-1.3339	-5.5511e-17	-4.5821	1.9454e-05	6.9882e-05	2.5782
2.39_469.142	-1.3338	-8.3382e-17	-4.5815	1.9498e-05	6.9927e-05	2.576
3.39_450.08	-1.3336	-9.0206e-18	-4.5804	1.9573e-05	7.0086e-05	2.5724
Aconitate 1 (cis or trans)	-1.3332	3.4868e-17	-4.5789	1.9679e-05	7.035e-05	2.5673
1.65_139.063	-1.3325	4.6861e-16	-4.5756	1.992e-05	7.1097e-05	2.5558
1.83_312.142	1.3324	4.8919e-17	4.5751	1.9961e-05	7.113e-05	2.5538
3.28_406.178	-1.3322	-2.0556e-16	-4.5741	2.0035e-05	7.1277e-05	2.5503
3.65_410.138	-1.3315	-2.683e-17	-4.5714	2.0234e-05	7.1847e-05	2.541
0.73_436.965	-1.3315	4.3368e-18	-4.571	2.026e-05	7.1847e-05	2.5398
2_504.105	-1.3309	9.1825e-17	-4.5686	2.0443e-05	7.2382e-05	2.5313
3.21_426.207	-1.3304	2.365e-17	-4.5662	2.0622e-05	7.2899e-05	2.5231
2.36_662.096	-1.3299	8.3035e-17	-4.564	2.0789e-05	7.3373e-05	2.5154
3.62_416.203	-1.3294	-1.7116e-17	-4.562	2.0945e-05	7.3805e-05	2.5084
2.23_550.149	-1.3291	1.6931e-16	-4.5605	2.1058e-05	7.4086e-05	2.5033
2.12_340.027	-1.3277	1.6561e-16	-4.5543	2.1544e-05	7.5676e-05	2.4817
6.11_560.319	-1.3276	1.4416e-16	-4.5536	2.1595e-05	7.5735e-05	2.4795
2.87_420.158	-1.3269	2.5732e-17	-4.5506	2.1834e-05	7.6453e-05	2.4691
4.61_436.231	-1.3259	-1.5266e-16	-4.5461	2.2201e-05	7.7615e-05	2.4534
3.09_390.188	-1.3257	-5.3198e-18	-4.5452	2.2276e-05	7.7757e-05	2.4502
3.43_262.093	-1.3248	-4.5681e-18	-4.5416	2.2571e-05	7.8566e-05	2.4378
3.56_566.2	-1.3248	-4.8572e-18	-4.5415	2.2579e-05	7.8566e-05	2.4374
3.16_404.167	-1.3243	1.5613e-17	-4.5393	2.2763e-05	7.9084e-05	2.4297
1.55_380.088	-1.3241	-6.4272e-17	-4.5384	2.2835e-05	7.9132e-05	2.4268
Dihydroxybenzoic acid 2	-1.3241	2.5188e-16	-4.5382	2.2848e-05	7.9132e-05	2.4262
3.1_504.132	-1.324	-8.7893e-18	-4.5376	2.29e-05	7.9187e-05	2.4241
3.25_512.168	-1.3234	-3.8164e-17	-4.535	2.3126e-05	7.9844e-05	2.4148
3.92_432.198	-1.323	1.2733e-16	-4.5334	2.3258e-05	8.0175e-05	2.4094
1.31_306.107	-1.3227	0	-4.5322	2.3359e-05	8.04e-05	2.4053
1.65_141.043	-1.3213	1.068e-16	-4.5257	2.3924e-05	8.2181e-05	2.3828
1.31_396.033	-1.3212	-9.0668e-17	-4.5254	2.3951e-05	8.2181e-05	2.3817
1.33_324.106	-1.3181	-3.9436e-17	-4.5116	2.5189e-05	8.6268e-05	2.3341
Procyanidin tetramer 2	-1.318	-1.2837e-17	-4.5112	2.522e-05	8.6268e-05	2.333
2.22_358.126	-1.3176	-8.6505e-17	-4.5097	2.5363e-05	8.6624e-05	2.3276
3.14_282.075	-1.3173	-1.8478e-16	-4.5082	2.5502e-05	8.6965e-05	2.3225
6.38_562.334	-1.3168	9.9457e-18	-4.5059	2.572e-05	8.7467e-05	2.3144
Isopropylmalate-like 4	-1.3168	-3.3307e-17	-4.5058	2.5728e-05	8.7467e-05	2.3141
1.25_210.055	-1.3165	-1.3392e-16	-4.5048	2.5825e-05	8.7664e-05	2.3106
3.08_432.197	-1.3163	-4.8572e-17	-4.504	2.5897e-05	8.7773e-05	2.308
3.46_598.225	-1.316	-3.0809e-16	-4.5026	2.6032e-05	8.7975e-05	2.303
0.77_164.032	1.316	-1.988e-16	4.5025	2.6036e-05	8.7975e-05	2.3029
6.08_561.246	1.3152	4.6144e-17	4.4988	2.639e-05	8.9035e-05	2.2902
1.65_95.037	-1.3146	8.8471e-18	-4.4965	2.6613e-05	8.9589e-05	2.2822
1.65_229.048	-1.3146	-1.4705e-16	-4.4963	2.6635e-05	8.9589e-05	2.2814
4.11_482.235	-1.3144	1.3993e-17	-4.4953	2.6731e-05	8.9776e-05	2.2781
3.51_555.211	-1.3138	-1.044e-16	-4.4928	2.6978e-05	9.0471e-05	2.2693
1.31_369.091	-1.3135	1.6376e-16	-4.4915	2.7101e-05	9.0746e-05	2.2651
1.66_267.005	-1.3132	-4.0824e-17	-4.49	2.7251e-05	9.1111e-05	2.2598
2.35_332.111	-1.3128	3.7239e-17	-4.4882	2.7436e-05	9.1591e-05	2.2535
1.65_252.063	-1.3122	1.249e-17	-4.4858	2.7676e-05	9.2255e-05	2.2452
3.25_442.205	-1.3121	3.6082e-17	-4.4851	2.7741e-05	9.2277e-05	2.243
Isopropylmalate-like 3	-1.312	3.8988e-17	-4.4848	2.7777e-05	9.2277e-05	2.2418
3_210.051	-1.3119	2.0961e-16	-4.4845	2.7808e-05	9.2277e-05	2.2408
3.34_320.146	-1.3113	4.5392e-17	-4.4818	2.8077e-05	9.3032e-05	2.2317
4.15_518.2	-1.3109	7.6328e-18	-4.4802	2.824e-05	9.3433e-05	2.2262
2.95_434.177	-1.3103	1.0385e-16	-4.4773	2.8546e-05	9.4304e-05	2.216
2.63_216.148	1.31	3.6429e-17	4.4761	2.8666e-05	9.4561e-05	2.2121
3.16_290.174	-1.3095	-1.7116e-17	-4.4738	2.8909e-05	9.5219e-05	2.2041
2.58_368.168	-1.3088	3.4232e-17	-4.4709	2.9218e-05	9.6095e-05	2.1941
3.61_342.076	-1.3084	-1.0015e-16	-4.4692	2.9393e-05	9.6497e-05	2.1884
2.39_442.123	-1.3084	-8.6042e-17	-4.4689	2.9427e-05	9.6497e-05	2.1874
3.5_536.186	-1.308	-1.6653e-17	-4.4672	2.9609e-05	9.6948e-05	2.1816
1.15_422.141	-1.3073	-6.9389e-18	-4.4641	2.995e-05	9.7923e-05	2.1707
3.52_476.189	-1.3072	-3.5967e-17	-4.4636	3.0001e-05	9.7943e-05	2.1692
Gallic acid	-1.3068	2.7386e-16	-4.462	3.0172e-05	9.8294e-05	2.1638
3.54_366.189	-1.3068	1.6121e-16	-4.4618	3.0197e-05	9.8294e-05	2.163
3.46_682.176	-1.3058	2.8218e-17	-4.4575	3.067e-05	9.9688e-05	2.1484
5.24_628.193	-1.3052	7.4015e-18	-4.4551	3.0939e-05	0.00010041	2.1401
4.56_436.231	-1.3045	-1.1056e-16	-4.4519	3.1307e-05	0.00010146	2.129
3.32_530.105	-1.304	-1.3138e-16	-4.4497	3.1559e-05	0.00010213	2.1214
3.61_103.993	-1.303	-1.8504e-18	-4.4453	3.2062e-05	0.00010361	2.1065
3.36_516.239	-1.3025	-3.3307e-17	-4.4432	3.2301e-05	0.00010423	2.0995
2.55_434.142	-1.3024	-4.0477e-17	-4.4427	3.2361e-05	0.00010427	2.0977
2.79_510.155	-1.3016	-2.313e-18	-4.4391	3.279e-05	0.0001055	2.0853
1.09_486.152	-1.3003	-8.8471e-17	-4.4337	3.3437e-05	0.0001073	2.0669
5.83_722.371	-1.3003	-2.5443e-17	-4.4336	3.3448e-05	0.0001073	2.0666
3.23_682.179	-1.3001	9.0206e-17	-4.4325	3.3581e-05	0.00010758	2.0628
2.47_432.162	-1.2998	-1.8411e-16	-4.4316	3.3697e-05	0.00010779	2.0596
0.83_86.037	-1.2996	2.9519e-17	-4.4306	3.3815e-05	0.00010801	2.0563
2.1_438.137	-1.2994	1.5034e-16	-4.4298	3.3908e-05	0.00010815	2.0537
3.26_492.184	-1.2983	-5.2504e-17	-4.425	3.4509e-05	0.00010991	2.0371
4.17_464.225	-1.2982	1.7347e-19	-4.4243	3.4593e-05	0.00010999	2.0348
2.61_328.047	-1.2981	-1.4213e-16	-4.424	3.4631e-05	0.00010999	2.0338
2.02_744.266	-1.2971	-3.2844e-17	-4.4199	3.5157e-05	0.0001115	2.0196
2.6_388.055	-1.2967	-1.4713e-16	-4.4177	3.5425e-05	0.00011218	2.0124
Salicylic acid fr 1	-1.2966	-5.0423e-17	-4.4174	3.5472e-05	0.00011218	2.0112
6.08_477.286	1.2964	-2.1511e-17	4.4164	3.56e-05	0.00011232	2.0078
5.74_582.188	-1.2963	2.6628e-17	-4.4163	3.5618e-05	0.00011232	2.0073
1.65_111.068	-1.295	-1.5497e-17	-4.4106	3.6349e-05	0.00011446	1.9882
2.9_516.147	-1.2945	9.2519e-18	-4.4082	3.6663e-05	0.00011529	1.9801
2.46_166.062	-1.2934	5.181e-17	-4.4034	3.7312e-05	0.00011716	1.9635
3.24_500.246	-1.2923	7.1644e-17	-4.3986	3.7965e-05	0.00011904	1.9472
2.39_444.121	-1.2908	4.2096e-17	-4.3924	3.8819e-05	0.00012155	1.9262
1.61_416.055	-1.2894	-1.966e-17	-4.3861	3.9716e-05	0.00012418	1.9047
1.09_296.069	-1.289	2.1048e-17	-4.3843	3.9972e-05	0.00012481	1.8986
3.1_548.12	-1.2881	-2.5674e-17	-4.3805	4.0526e-05	0.00012636	1.8856
3.67_748.29	-1.2878	2.4633e-17	-4.3793	4.0703e-05	0.00012673	1.8816
6.1_724.386	-1.2874	-3.8395e-17	-4.3775	4.0964e-05	0.00012737	1.8755
0.69_338.085	-1.2858	2.7802e-16	-4.3705	4.2009e-05	0.00013043	1.8518
2.69_414.173	-1.2849	7.494e-17	-4.3669	4.2556e-05	0.00013195	1.8396
2.53_356.167	-1.2843	-5.7824e-18	-4.364	4.3001e-05	0.0001331	1.8298
3.2_588.114	-1.2842	-5.4123e-17	-4.3637	4.3047e-05	0.0001331	1.8288
1.93_294.131	-1.2836	1.5196e-16	-4.361	4.3467e-05	0.00013421	1.8197
Tryptophan	1.2814	4.8572e-17	4.3518	4.4933e-05	0.00013854	1.7884
1.59_295.038	1.2811	-1.0582e-16	4.3505	4.514e-05	0.00013899	1.7841
1.85_420.067	-1.281	-1.966e-17	-4.3498	4.5253e-05	0.00013914	1.7817
1.52_326.119	1.2808	-3.4926e-17	4.3489	4.5403e-05	0.00013924	1.7786
6.17_506.265	-1.2807	-5.4355e-18	-4.3488	4.5411e-05	0.00013924	1.7785
3.21_540.196	-1.2801	-4.4872e-17	-4.3459	4.5883e-05	0.0001405	1.7687
2.87_527.105	-1.2799	-3.3769e-17	-4.3451	4.6011e-05	0.0001407	1.7661
1.77_134.058	-1.2797	8.3614e-17	-4.3443	4.6155e-05	0.00014094	1.7632
2.86_444.073	-1.2795	8.5117e-17	-4.3435	4.6285e-05	0.00014115	1.7605
3.77_578.201	-1.2786	8.0722e-17	-4.3396	4.6933e-05	0.00014292	1.7474
3.58_408.199	-1.2782	3.2613e-17	-4.3378	4.7242e-05	0.00014367	1.7412
0.73_130.027	-1.2776	1.7116e-17	-4.3352	4.7673e-05	0.0001445	1.7327
3.45_714.271	-1.2776	2.4055e-17	-4.3352	4.7675e-05	0.0001445	1.7327
2.73_526.168	-1.2775	-2.7756e-18	-4.335	4.7712e-05	0.0001445	1.7319
2.52_466.111	-1.2767	-1.8851e-17	-4.3312	4.8374e-05	0.00014631	1.719
2.6_312.082	-1.2761	4.5797e-17	-4.3287	4.8798e-05	0.00014739	1.7107
0.83_130.027	-1.2756	4.1142e-17	-4.3267	4.9163e-05	0.00014829	1.7037
Salicylic acid glucoside 1 (FA)	-1.2744	4.7531e-17	-4.3217	5.0047e-05	0.00015075	1.6869
2.87_470.158	-1.2731	-4.3484e-17	-4.316	5.1068e-05	0.00015362	1.6679
1.15_663.107	1.2729	2.7756e-17	4.3149	5.1274e-05	0.00015403	1.6641
3.61_164.014	-1.2725	1.6653e-17	-4.3134	5.155e-05	0.00015465	1.6591
3.05_424.177	-1.272	9.3444e-17	-4.3113	5.1941e-05	0.00015561	1.652
2.36_677.058	-1.2716	4.3946e-18	-4.3093	5.2304e-05	0.00015649	1.6454
3.45_668.266	-1.2708	-2.5905e-17	-4.3061	5.2911e-05	0.00015809	1.6346
1.39_420.048	-1.2706	-8.8355e-17	-4.305	5.312e-05	0.00015832	1.6309
3.57_494.125	-1.2705	4.1229e-17	-4.3047	5.3179e-05	0.00015832	1.6298
3.49_426.062	-1.2705	5.9212e-17	-4.3046	5.3201e-05	0.00015832	1.6294
2.81_344.11	-1.2704	5.528e-17	-4.3042	5.3273e-05	0.00015832	1.6282
1.75_362.119	-1.2698	-1.4167e-16	-4.3018	5.3729e-05	0.00015925	1.6201
1.6_308.113	-1.2698	1.0709e-16	-4.3017	5.3757e-05	0.00015925	1.6197
Tyrosine	1.2697	-1.2027e-17	4.3014	5.3802e-05	0.00015925	1.6189
3.29_832.313	-1.2691	-4.4409e-17	-4.2986	5.4339e-05	0.00016063	1.6095
2.66_409.043	-1.269	5.1001e-17	-4.2983	5.4415e-05	0.00016064	1.6082
Procyanidin tetramer 3	-1.2679	-8.0954e-19	-4.2935	5.5348e-05	0.00016312	1.5922
1.73_396.036	-1.2677	2.0817e-18	-4.293	5.5445e-05	0.00016312	1.5906
3.29_345.133	-1.2677	5.3661e-17	-4.2928	5.5474e-05	0.00016312	1.5901
4.67_566.254	-1.2673	1.9429e-17	-4.2909	5.5855e-05	0.00016402	1.5836
6.11_550.291	-1.2663	-9.1413e-17	-4.2869	5.6669e-05	0.00016614	1.57
3.29_600.204	-1.2662	6.4763e-18	-4.2866	5.6726e-05	0.00016614	1.5691
2.39_452.153	-1.2648	-2.1557e-16	-4.2804	5.7998e-05	0.00016963	1.5482
1.72_470.162	-1.2647	8.0954e-17	-4.28	5.807e-05	0.00016963	1.547
2.69_316.094	-1.2646	1.7619e-16	-4.2795	5.8167e-05	0.00016969	1.5455
1.65_336.106	-1.2645	-3.7406e-16	-4.279	5.8278e-05	0.00016979	1.5437
Caffeoyl glucose 2	-1.264	-4.1576e-17	-4.2769	5.8721e-05	0.00017085	1.5366
3.36_466.111	-1.2636	1.9753e-16	-4.2753	5.9053e-05	0.00017142	1.5313
3.1_588.114	-1.2636	-1.6283e-16	-4.2752	5.9071e-05	0.00017142	1.531
Dihydroxybenzoic acid 1	-1.2633	-1.382e-17	-4.2742	5.9283e-05	0.00017181	1.5276
0.73_229.977	-1.2628	5.4817e-17	-4.2719	5.9763e-05	0.00017294	1.52
3.8_658.224	-1.2627	3.7007e-18	-4.2716	5.9826e-05	0.00017294	1.519
2.58_414.173	-1.2626	-8.824e-17	-4.2709	5.9993e-05	0.00017319	1.5164
3.25_502.226	-1.2622	3.7239e-17	-4.2692	6.0339e-05	0.00017397	1.511
4.17_522.206	-1.2619	-4.0159e-17	-4.2682	6.0572e-05	0.00017441	1.5074
0.73_422.005	-1.261	2.4286e-17	-4.2641	6.1443e-05	0.0001765	1.494
3.07_344.111	-1.261	-5.9819e-17	-4.2641	6.1457e-05	0.0001765	1.4937
3.65_359.122	-1.2605	1.2675e-16	-4.2621	6.1899e-05	0.00017754	1.487
2.61_353.075	-1.2604	5.4933e-17	-4.2615	6.202e-05	0.00017766	1.4852
3.45_492.197	-1.2601	3.1919e-17	-4.2606	6.2221e-05	0.00017769	1.4821
4.43_578.236	-1.2601	7.5865e-17	-4.2605	6.2245e-05	0.00017769	1.4818
6.02_724.386	-1.2601	4.811e-17	-4.2604	6.227e-05	0.00017769	1.4814
2.12_272.077	1.2597	7.2627e-17	4.2587	6.2636e-05	0.00017829	1.4759
1.31_296.111	-1.2597	-5.1117e-17	-4.2587	6.2644e-05	0.00017829	1.4758
1.97_326.157	-1.2593	1.1912e-16	-4.2569	6.3042e-05	0.0001792	1.4698
2.57_444.199	-1.259	3.9089e-17	-4.2559	6.3275e-05	0.00017956	1.4663
1.84_332.111	-1.259	-8.9003e-16	-4.2556	6.333e-05	0.00017956	1.4655
4.48_528.272	-1.2588	7.8641e-18	-4.255	6.3473e-05	0.00017968	1.4634
0.73_233.994	-1.2588	-2.683e-17	-4.2547	6.3536e-05	0.00017968	1.4625
0.52_427.029	1.2586	-7.0314e-17	4.254	6.3684e-05	0.00017987	1.4603
1.65_310.996	-1.2583	2.9606e-17	-4.2525	6.4027e-05	0.00018061	1.4552
2.33_418.11	-1.258	3.0115e-16	-4.2515	6.4258e-05	0.00018089	1.4518
1.39_449.002	-1.258	-7.76e-17	-4.2514	6.429e-05	0.00018089	1.4514
6.08_380.196	1.2572	1.9984e-16	4.248	6.5073e-05	0.00018286	1.44
0.77_139.027	1.2569	-1.1253e-16	4.2467	6.5361e-05	0.00018344	1.4358
6.15_294.218	1.2563	-2.5558e-17	4.2441	6.5975e-05	0.00018493	1.4271
1.85_440.061	-1.2557	4.9266e-17	-4.2417	6.6532e-05	0.00018625	1.4192
3.17_556.177	-1.2556	-1.101e-16	-4.2411	6.6672e-05	0.00018641	1.4172
3.21_472.215	-1.2552	1.0732e-16	-4.2394	6.7079e-05	0.00018731	1.4115
1.97_314.1	-1.255	-1.6376e-16	-4.2388	6.7228e-05	0.00018749	1.4094
4.25_554.215	-1.2544	1.2357e-16	-4.2364	6.7798e-05	0.00018885	1.4014
4.16_494.195	-1.2543	-8.1416e-17	-4.2359	6.7911e-05	0.00018893	1.3999
2.93_339.13	-1.2542	4.2327e-17	-4.2352	6.8083e-05	0.00018905	1.3975
3.65_132.079	-1.2541	-2.1742e-17	-4.235	6.8127e-05	0.00018905	1.3969
4.01_501.205	1.2538	6.1525e-17	4.2338	6.8418e-05	0.00018962	1.3929
0.92_74.037	1.2536	-5.3429e-17	4.2329	6.8644e-05	0.00019001	1.3898
3.46_630.214	-1.2534	-3.4001e-17	-4.2321	6.883e-05	0.00019029	1.3872
5.65_460.152	-1.2529	2.7062e-17	-4.2297	6.9427e-05	0.00019153	1.3791
2.46_470.199	-1.2528	-3.828e-17	-4.2296	6.9452e-05	0.00019153	1.3788
1.31_366.074	-1.2526	3.1225e-17	-4.2285	6.9715e-05	0.00019202	1.3752
1.35_382.058	-1.2524	1.3991e-16	-4.2279	6.9873e-05	0.00019222	1.3731
4.93_496.173	-1.2523	2.485e-16	-4.2271	7.0052e-05	0.00019247	1.3707
2.26_271.052	-1.2521	-1.1623e-17	-4.2267	7.0176e-05	0.00019257	1.369
2.39_406.147	-1.2519	3.7239e-17	-4.2257	7.0423e-05	0.00019301	1.3657
5.29_620.164	-1.2514	-1.7579e-17	-4.2234	7.0993e-05	0.00019433	1.3582
1.65_555.098	-1.2505	-1.4294e-16	-4.2199	7.1883e-05	0.00019653	1.3465
Hypoxanthine-like	-1.2479	-5.9212e-17	-4.2085	7.4822e-05	0.00020431	1.3088
3.06_450.116	-1.2472	3.9667e-17	-4.2056	7.5587e-05	0.00020615	1.2993
2.68_166.027	-1.2469	-1.2849e-16	-4.2044	7.592e-05	0.0002068	1.2951
2.72_390.199	-1.2462	-1.0732e-16	-4.2017	7.6645e-05	0.00020852	1.2862
4.74_452.26	-1.246	3.3307e-17	-4.2006	7.6928e-05	0.00020903	1.2827
3.29_590.195	-1.2449	-4.915e-17	-4.1959	7.8233e-05	0.00021232	1.2669
Prodelphinidin dimer 2	-1.2443	2.4517e-17	-4.1936	7.8855e-05	0.00021375	1.2595
1.57_364.096	-1.2442	-1.323e-16	-4.193	7.9032e-05	0.00021396	1.2574
5.25_774.229	-1.2439	-4.1633e-17	-4.1919	7.9347e-05	0.00021456	1.2537
5.29_520.209	-1.2436	-8.0376e-18	-4.1906	7.971e-05	0.00021528	1.2494
3.49_674.154	-1.2425	2.7756e-17	-4.186	8.0989e-05	0.00021846	1.2344
3.73_336.178	-1.2423	3.4232e-17	-4.1852	8.1233e-05	0.00021886	1.2316
3.21_376.114	-1.2419	8.6158e-17	-4.1832	8.179e-05	0.00022009	1.2252
Phenol fr 7	-1.2412	6.1062e-17	-4.1803	8.2638e-05	0.0002221	1.2155
3.02_456.069	-1.2408	-7.6906e-17	-4.1787	8.3105e-05	0.00022309	1.2102
3.1_328.11	-1.2405	-1.0547e-16	-4.1775	8.3473e-05	0.00022354	1.2061
2.94_388.136	-1.2405	1.1102e-16	-4.1774	8.3475e-05	0.00022354	1.206
2.09_414.173	-1.2385	2.5417e-16	-4.1693	8.5913e-05	0.00022944	1.179
1.84_378.116	-1.2385	1.6474e-16	-4.1691	8.5963e-05	0.00022944	1.1785
1.65_570.054	-1.2385	8.7893e-18	-4.169	8.599e-05	0.00022944	1.1782
3.07_474.083	-1.2383	3.7007e-17	-4.1681	8.6269e-05	0.00022991	1.1751
1.09_353.017	-1.2373	-1.8203e-16	-4.164	8.7505e-05	0.00023251	1.1618
4.17_425.233	-1.2373	5.5049e-17	-4.164	8.7511e-05	0.00023251	1.1617
1.2_331.127	-1.2372	4.2816e-16	-4.1638	8.758e-05	0.00023251	1.161
5.29_661.179	-1.2372	6.8464e-17	-4.1635	8.7662e-05	0.00023251	1.1601
3.31_392.203	-1.237	4.6259e-19	-4.1629	8.7859e-05	0.00023259	1.158
Procyanidin dimer 3	-1.2369	2.1742e-17	-4.1625	8.7986e-05	0.00023259	1.1566
5.29_696.08	-1.2369	-9.9342e-17	-4.1624	8.8008e-05	0.00023259	1.1564
2.8_469.134	-1.2362	8.7893e-18	-4.1596	8.8876e-05	0.00023461	1.1472
2.83_380.167	-1.2349	4.5912e-17	-4.154	9.0636e-05	0.00023897	1.1288
3.23_630.215	-1.2344	1.6885e-17	-4.1521	9.1247e-05	0.0002403	1.1225
3.67_448.101	-1.2343	5.4817e-17	-4.1514	9.1479e-05	0.00024042	1.1201
1.91_456.184	-1.2342	-5.3198e-17	-4.1513	9.1513e-05	0.00024042	1.1198
2.19_414.173	-1.2339	1.9198e-17	-4.1499	9.1954e-05	0.0002413	1.1153
Phenylalanine fr 3	-1.2319	-2.5842e-16	-4.1413	9.4771e-05	0.0002484	1.0869
0.92_189.063	-1.2314	8.7893e-17	-4.1395	9.5358e-05	0.00024964	1.0812
2.73_536.152	-1.2312	-1.3993e-17	-4.1383	9.5746e-05	0.00025036	1.0773
5.88_475.269	-1.2304	-1.0686e-16	-4.135	9.6877e-05	0.00025302	1.0663
6.1_577.309	-1.23	4.7184e-17	-4.1333	9.7446e-05	0.00025421	1.0608
2.8_340.173	-1.2298	7.7716e-17	-4.1326	9.7684e-05	0.00025453	1.0585
2.61_312.061	-1.2292	-5.5049e-17	-4.1301	9.8552e-05	0.00025649	1.0502
1.09_403	-1.2287	4.6259e-18	-4.1279	9.9302e-05	0.00025814	1.0431
2.15_436.157	-1.2284	-1.2768e-16	-4.1266	9.9756e-05	0.00025902	1.0389
1.57_296.111	-1.2256	-3.8164e-16	-4.1153	0.00010378	0.00026916	1.0018
3.31_436.193	-1.2254	1.079e-16	-4.1143	0.00010413	0.00026975	0.99859
Cinnamic acid 1	-1.225	-2.6784e-16	-4.1126	0.00010476	0.00027105	0.99299
3.14_598.224	-1.2246	5.2533e-17	-4.1109	0.00010537	0.00027232	0.98751
4.2_566.216	-1.2239	5.4355e-17	-4.1083	0.00010636	0.00027456	0.97875
2.8_479.163	-1.2228	4.1633e-17	-4.1035	0.00010815	0.00027886	0.96307
3.65_551.876	1.2222	-1.2247e-16	4.1009	0.00010911	0.00028064	0.95485
Mevalonic acid 1	-1.2221	-1.4433e-16	-4.1007	0.00010918	0.00028064	0.95424
1.75_111.032	-1.2221	-6.4763e-17	-4.1006	0.00010922	0.00028064	0.95387
3.06_644.23	-1.2217	1.3626e-16	-4.0989	0.00010987	0.00028176	0.94828
6.08_577.21	1.2217	-1.6098e-16	4.0988	0.00010991	0.00028176	0.94795
2.8_433.157	-1.2215	2.7015e-16	-4.0982	0.00011015	0.00028205	0.94592
Succinic acid	1.2208	-1.3554e-16	4.0951	0.00011133	0.00028474	0.93595
5.29_698.084	-1.2205	2.4911e-16	-4.0937	0.00011189	0.00028583	0.93126
1.65_326.965	-1.2203	-1.6003e-16	-4.0929	0.00011221	0.00028632	0.9286
3.58_434.085	-1.2201	9.4947e-17	-4.0924	0.0001124	0.00028649	0.92694
2.15_482.163	-1.2196	-4.9729e-18	-4.0902	0.00011325	0.00028829	0.91988
2.31_328.08	-1.2195	-1.2328e-16	-4.0899	0.00011337	0.00028829	0.91893
2.22_412.096	-1.2194	1.323e-16	-4.0894	0.0001136	0.00028854	0.91706
1.31_306.095	-1.2191	-4.1633e-18	-4.0879	0.00011415	0.00028962	0.91248
1.39_404.003	-1.2186	-6.8464e-17	-4.0861	0.00011491	0.0002912	0.90632
2.1_473.164	-1.2185	-4.0477e-16	-4.0856	0.00011508	0.00029131	0.90489
3.25_207.089	-1.2179	-2.0354e-17	-4.0833	0.00011601	0.00029333	0.89733
1.65_183.053	-1.2174	1.67e-16	-4.0809	0.000117	0.00029541	0.88942
1.75_273.085	-1.2173	-1.5497e-17	-4.0806	0.0001171	0.00029541	0.88858
2.12_288.048	1.2164	9.3791e-17	4.0769	0.00011862	0.0002989	0.87651
2.96_302.136	-1.2161	2.8334e-17	-4.0758	0.00011906	0.00029968	0.87302
2.87_496.176	-1.2159	3.6545e-17	-4.0749	0.00011946	0.00030034	0.8699
6.08_545.272	1.2157	4.2559e-17	4.074	0.0001198	0.00030071	0.8672
1.25_282	-1.2157	-1.2027e-17	-4.0739	0.00011988	0.00030071	0.86662
2.12_334.048	1.2142	-2.8681e-17	4.0679	0.00012238	0.00030664	0.84727
2.73_358.126	-1.2138	1.0362e-16	-4.066	0.00012318	0.00030818	0.84115
3.03_454.056	-1.2137	2.4055e-17	-4.0658	0.00012327	0.00030818	0.84047
1.43_686.189	-1.2135	-5.4586e-17	-4.0649	0.00012366	0.0003088	0.83754
5.34_914.277	-1.2133	1.2629e-16	-4.064	0.00012405	0.00030943	0.83457
2.76_448.157	-1.2131	1.7579e-17	-4.0633	0.00012436	0.00030967	0.83224
5.29_636.155	-1.2131	4.6953e-17	-4.0631	0.00012442	0.00030967	0.83175
2.76_408.099	-1.2127	-1.9429e-17	-4.0618	0.00012502	0.00031079	0.82729
3.01_430.156	-1.2122	8.5146e-17	-4.0595	0.000126	0.00031289	0.81995
4.17_554.203	-1.2119	-9.2519e-19	-4.0584	0.0001265	0.00031377	0.81626
1.09_324.064	-1.2096	2.2326e-16	-4.0487	0.00013081	0.00032393	0.78487
2.61_604.113	-1.2095	4.0014e-17	-4.0485	0.00013088	0.00032393	0.78435
4.14_295.851	1.2089	1.2166e-16	4.0457	0.00013215	0.00032664	0.77537
2.61_785.155	1.2088	1.031e-16	4.0455	0.00013227	0.00032664	0.77446
3.46_668.195	-1.2086	-1.5728e-17	-4.0446	0.00013267	0.00032726	0.77164
1.42_257.138	1.2078	1.5774e-16	4.0414	0.00013414	0.0003305	0.76136
5.06_932.287	-1.2077	7.6328e-18	-4.0407	0.00013445	0.00033091	0.75916
3.47_404.166	-1.2075	5.0191e-17	-4.0402	0.00013468	0.00033112	0.75755
3.52_580.21	-1.2072	1.1565e-16	-4.0388	0.00013537	0.00033243	0.75281
5.29_478.162	-1.207	5.6668e-18	-4.0381	0.00013566	0.00033278	0.75079
5.29_634.16	-1.2069	1.7579e-17	-4.0378	0.00013582	0.00033281	0.74967
2.12_117.058	1.2062	3.2728e-17	4.0347	0.00013731	0.00033608	0.7395
2.87_498.157	-1.2059	2.5674e-17	-4.0333	0.00013794	0.00033719	0.73517
2_629.046	-1.2058	-1.3832e-16	-4.0331	0.00013807	0.00033719	0.73433
2.38_426.094	-1.2056	2.1511e-17	-4.0324	0.00013836	0.00033753	0.73236
1.42_304.079	-1.2055	5.3198e-17	-4.0317	0.0001387	0.00033799	0.73005
1.53_416.091	-1.2048	-6.5688e-17	-4.0289	0.00014004	0.0003409	0.72101
3.32_575.106	-1.2046	-9.8301e-18	-4.0282	0.00014039	0.00034135	0.71874
3.22_636.19	-1.2041	-1.2559e-16	-4.0262	0.00014139	0.00034343	0.71204
5.82_519.258	-1.2039	1.5613e-17	-4.0253	0.00014181	0.00034406	0.7093
Coniferin	-1.2027	-1.0455e-16	-4.0204	0.00014424	0.00034957	0.6934
Procyanidin trimer 3	-1.2009	1.9897e-16	-4.0131	0.00014791	0.00035808	0.66986
0.77_204.027	-1.2006	6.962e-17	-4.0117	0.00014864	0.00035945	0.66529
3.23_552.22	-1.2004	4.3114e-16	-4.011	0.00014895	0.00035982	0.66331
2.79_396.163	-1.1993	2.4286e-17	-4.0064	0.00015136	0.00036523	0.64832
3.29_1090.423	-1.1988	7.9103e-17	-4.0045	0.00015237	0.00036701	0.64209
1.1_374.046	-1.1988	5.5511e-18	-4.0043	0.00015243	0.00036701	0.64174
1.39_350.085	-1.198	1.1831e-16	-4.0012	0.0001541	0.00037024	0.63153
2.85_448.101	-1.198	4.811e-17	-4.0012	0.0001541	0.00037024	0.63152
1.39_434.037	-1.1979	1.7023e-16	-4.0006	0.00015442	0.00037061	0.62957
2.18_376.184	-1.197	1.5959e-16	-3.997	0.00015632	0.00037476	0.61814
5.96_594.28	-1.1969	1.2027e-17	-3.9965	0.00015657	0.00037495	0.61667
0.92_1039.027	1.1965	-6.0253e-17	3.995	0.00015737	0.00037646	0.61186
6.07_1064.603	1.1965	-1.6561e-16	3.9947	0.00015753	0.00037646	0.6109
0.69_338.084	-1.196	-1.5081e-16	-3.993	0.00015847	0.00037829	0.60534
5.29_666.169	-1.1956	4.013e-17	-3.9911	0.00015952	0.00038039	0.59916
3.85_434.121	-1.1947	4.1402e-17	-3.9877	0.00016139	0.00038442	0.5883
0.65_208.058	-1.1914	3.1699e-16	-3.9741	0.00016911	0.00040239	0.54458
6.1_628.306	-1.1913	-1.5699e-17	-3.9737	0.00016932	0.00040245	0.54344
1.28_290.11	-1.1905	8.7199e-17	-3.9704	0.00017126	0.00040662	0.5328
3.68_482.141	1.1896	-2.7582e-17	3.9669	0.00017334	0.00041113	0.52148
4.93_730.187	-1.1889	7.1239e-17	-3.9638	0.00017517	0.00041503	0.51167
2.96_466.168	-1.1881	3.8395e-17	-3.9607	0.00017702	0.00041895	0.50188
4.93_616.193	-1.1875	8.8818e-17	-3.9579	0.00017871	0.00042228	0.49298
Procyanidin dimer 1	-1.1874	8.305e-18	-3.9578	0.0001788	0.00042228	0.4925
3.03_522.207	-1.1864	1.1102e-16	-3.9537	0.0001813	0.00042772	0.47954
Procyanidin tetramer 1	-1.1861	9.7145e-18	-3.9522	0.00018224	0.0004292	0.4747
5.88_543.256	-1.186	7.0777e-17	-3.9521	0.00018232	0.0004292	0.47432
1.65_541.1	-1.1858	-7.1239e-17	-3.9513	0.00018279	0.00042986	0.4719
2.14_360.105	-1.1839	4.6028e-17	-3.9433	0.00018785	0.00044129	0.44639
3.46_650.182	-1.1837	-2.8681e-17	-3.9425	0.00018839	0.0004421	0.44368
3.56_340.132	-1.183	2.7756e-18	-3.9398	0.00019011	0.00044566	0.4352
1.73_338.119	-1.1824	-3.7007e-17	-3.9372	0.00019183	0.00044879	0.42679
2_629.198	-1.1824	1.2027e-16	-3.9372	0.00019185	0.00044879	0.42669
3.39_596.209	-1.182	-1.5023e-16	-3.9357	0.00019278	0.00045049	0.42219
1.66_297.006	-1.1816	-2.2204e-17	-3.9342	0.00019382	0.00045244	0.41716
3.08_118.062	-1.1813	-1.4572e-16	-3.9327	0.00019477	0.0004542	0.41257
2.76_428.189	-1.1805	-5.8518e-17	-3.9294	0.00019697	0.00045884	0.4021
1.65_227.043	-1.1796	4.6144e-17	-3.9258	0.00019943	0.00046408	0.39051
2.44_338.157	-1.1791	-5.7824e-17	-3.9239	0.00020072	0.00046659	0.3845
3.77_430.183	-1.1787	3.932e-18	-3.9223	0.0002018	0.00046863	0.37944
5.29_460.153	-1.1785	9.9631e-17	-3.9217	0.00020224	0.00046914	0.37745
3.49_464.095	-1.1781	9.3444e-17	-3.9201	0.00020335	0.00047123	0.37233
1.65_1148.045	-1.1777	2.9953e-17	-3.9182	0.00020462	0.00047353	0.36651
Dihydroxybenzoic acid 4	-1.1776	2.387e-16	-3.918	0.00020477	0.00047353	0.36581
1.09_440.147	-1.1771	3.6227e-17	-3.916	0.00020616	0.00047626	0.35948
1.72_424.157	-1.1762	7.7253e-17	-3.9123	0.00020876	0.00048175	0.34782
1.73_160.074	1.1761	-1.8492e-16	3.9117	0.00020923	0.00048202	0.34572
5.29_712.176	-1.176	2.5859e-16	-3.9115	0.00020936	0.00048202	0.34512
2.69_640.161	-1.176	3.6429e-17	-3.9113	0.00020953	0.00048202	0.34438
1.39_90.031	-1.1757	-3.3307e-17	-3.9102	0.00021025	0.00048319	0.34116
1.73_344.112	-1.1751	6.8232e-17	-3.9078	0.00021201	0.00048672	0.33339
1.63_654.235	-1.1746	7.6328e-17	-3.9056	0.00021357	0.00048939	0.32656
1.09_469.1	-1.1746	1.7116e-17	-3.9056	0.00021361	0.00048939	0.32636
2.74_314.1	-1.1736	1.3427e-16	-3.9016	0.00021654	0.00049558	0.31366
2.52_312.085	-1.1723	-2.5153e-17	-3.8963	0.00022039	0.00050389	0.29718
5.29_598.184	-1.172	-2.9652e-16	-3.8951	0.00022136	0.00050558	0.29309
6.08_280.24	1.1705	-2.4228e-17	3.8891	0.00022585	0.0005153	0.27437
4.15_569.151	-1.1697	-8.9049e-18	-3.8859	0.00022836	0.00052029	0.26405
0.64_262.079	-1.1696	2.9606e-17	-3.8857	0.00022851	0.00052029	0.26345
0.73_148.037	-1.1692	3.9899e-17	-3.884	0.00022984	0.00052279	0.25802
1.11_240.067	-1.1689	5.5511e-17	-3.8826	0.00023088	0.00052463	0.25379
4.13_569.153	-1.1679	3.3075e-17	-3.8788	0.0002339	0.00053094	0.24169
3.45_536.186	-1.1675	1.3184e-17	-3.877	0.00023531	0.0005336	0.23607
5.26_630.206	-1.1674	-1.2478e-16	-3.8765	0.00023572	0.00053397	0.23446
3.2_400.212	-1.1671	2.2089e-17	-3.8754	0.00023661	0.00053544	0.23094
4.48_526.261	-1.1664	-4.5855e-17	-3.8727	0.00023876	0.00053976	0.22251
2.39_522.116	-1.1661	-2.9606e-17	-3.8714	0.00023979	0.00054153	0.2185
1.09_358.979	-1.1652	-6.8464e-17	-3.8678	0.00024277	0.00054771	0.20698
1.15_541.061	1.1646	-5.5974e-17	3.8654	0.00024475	0.00055141	0.19939
2.76_394.104	-1.1646	-3.0103e-16	-3.8652	0.00024491	0.00055141	0.19879
3.14_204.1	-1.1644	6.4069e-17	-3.8646	0.00024539	0.00055193	0.19697
3.29_1097.328	-1.1642	1.707e-16	-3.8639	0.00024597	0.00055208	0.19474
2.69_526.168	-1.1642	9.4716e-17	-3.8638	0.00024603	0.00055208	0.19452
1.31_380.067	-1.1642	-1.471e-16	-3.8636	0.0002462	0.00055208	0.1939
3.5_604.139	-1.1634	-5.3198e-17	-3.8605	0.00024882	0.0005574	0.184
1.57_396.034	-1.1628	-1.131e-16	-3.858	0.00025086	0.00056141	0.17639
2.96_180.062	-1.1611	-1.3109e-16	-3.8513	0.00025659	0.00057364	0.15534
2.6_424.058	-1.1609	2.313e-18	-3.8505	0.0002573	0.00057465	0.15277
2.83_282.074	-1.1594	-7.2164e-17	-3.8444	0.00026262	0.00058595	0.13368
5.39_180.115	-1.1582	3.5157e-17	-3.8396	0.00026694	0.00059498	0.11849
2.89_212.032	-1.1576	1.2389e-17	-3.8373	0.00026902	0.00059903	0.11123
1.02_222.056	-1.1567	-2.6888e-17	-3.8336	0.00027233	0.0006058	0.099832
3.51_398.161	-1.1559	5.0885e-18	-3.8305	0.00027517	0.00061113	0.090169
3.44_534.173	-1.1559	-1.8527e-16	-3.8304	0.00027528	0.00061113	0.089797
2.1_392.131	-1.1558	6.3375e-17	-3.8298	0.00027582	0.00061136	0.087984
3.66_434.12	-1.1557	1.1102e-17	-3.8297	0.00027594	0.00061136	0.087591
Homogentisic acid/Hydroxymethoxybenzoic acid fr 3	-1.1556	-9.5757e-17	-3.829	0.00027659	0.00061219	0.085398
3.29_606.167	-1.1555	-8.7893e-18	-3.8287	0.00027692	0.00061226	0.084285
2.73_364.116	-1.1554	8.8124e-17	-3.8284	0.00027717	0.00061226	0.083422
Procyanidin trimer 1	-1.155	-8.4886e-17	-3.827	0.00027847	0.00061452	0.079075
Coumaric acid glucoside 3 (FA)	-1.1543	1.4572e-16	-3.824	0.00028126	0.00061981	0.069781
3.23_598.225	-1.1543	-1.2305e-16	-3.8239	0.00028143	0.00061981	0.069239
5.27_568.172	-1.1538	-1.3878e-18	-3.8221	0.00028307	0.00062281	0.063807
3.24_322.162	1.1533	-5.0654e-17	3.82	0.00028511	0.00062669	0.057104
Coumaric acid glucoside 2 (FA)	-1.1529	-1.1073e-16	-3.8185	0.00028652	0.00062916	0.052512
5.83_294.219	-1.1506	-1.6769e-17	-3.8092	0.00029562	0.0006485	0.023398
4_552.202	1.15	-3.5388e-17	3.8068	0.00029798	0.00065302	0.016009
4.91_368.222	-1.1494	-2.5016e-16	-3.8045	0.00030026	0.00065738	0.0088869
Hydroxycinnamic acid/Coniferoyl aldehyde 2	-1.1491	6.245e-18	-3.8033	0.00030144	0.0006593	0.0052539
6.25_538.349	1.1467	-2.5443e-17	3.7936	0.00031141	0.00067983	-0.025061
Arbutin/hydroquinone glucoside	1.1467	2.3592e-17	3.7936	0.00031143	0.00067983	-0.02512
0.55_550.173	-1.1466	9.2519e-19	-3.7933	0.00031176	0.00067988	-0.026105
4.69_616.193	-1.1462	-3.8164e-17	-3.7918	0.00031327	0.0006825	-0.030607
3.44_342.112	-1.1452	-1.8457e-16	-3.7877	0.00031758	0.0006912	-0.043309
2.97_482.105	-1.1449	1.8735e-17	-3.7866	0.00031881	0.0006932	-0.046915
6.16_545.272	1.1446	-2.9404e-17	3.7852	0.00032027	0.0006957	-0.051176
2.99_492.182	-1.1437	3.7007e-18	-3.7816	0.00032419	0.00070352	-0.062491
Salicylic acid fr 7	-1.1433	1.0177e-17	-3.78	0.00032586	0.00070644	-0.067256
3.25_456.184	1.143	-1.4687e-17	3.7789	0.00032703	0.00070831	-0.070617
2.46_442.109	-1.1427	2.2991e-16	-3.7778	0.00032829	0.00071034	-0.074191
3.78_556.23	-1.1416	8.8471e-18	-3.7732	0.00033329	0.00072045	-0.088251
6.29_432.227	-1.1406	3.3538e-17	-3.7694	0.00033755	0.00072895	-0.10006
3.16_486.23	-1.1391	1.0547e-16	-3.7633	0.0003445	0.00074324	-0.11903
2.66_380.09	-1.1386	-2.1117e-16	-3.7615	0.00034661	0.00074683	-0.1247
3.12_601.198	-1.1386	6.5645e-17	-3.7613	0.00034684	0.00074683	-0.12532
0.73_275.98	-1.1376	-4.2559e-17	-3.7575	0.00035121	0.0007555	-0.13696
4.01_474.187	1.1361	-5.3429e-17	3.7517	0.00035804	0.00076946	-0.15489
3.29_560.181	-1.136	-4.7647e-17	-3.7513	0.00035854	0.00076978	-0.15617
3.59_470.197	1.1358	-2.6599e-17	3.7501	0.00035989	0.00077193	-0.15967
0.98_152.033	1.135	-1.1287e-16	3.7473	0.00036336	0.00077863	-0.1686
1.06_268.062	-1.1348	-3.8736e-16	-3.7465	0.0003643	0.00077988	-0.17099
Coumaric acid glucoside 4	-1.1345	-1.8215e-17	-3.7453	0.00036567	0.00078208	-0.1745
3.22_374.1	-1.1333	7.4015e-18	-3.7405	0.00037162	0.00079403	-0.1895
2.05_458.199	-1.1329	-1.8041e-17	-3.7387	0.00037385	0.00079803	-0.19507
1.68_679.194	-1.1323	5.4759e-17	-3.7364	0.00037661	0.00080315	-0.20191
3.1_453.183	-1.1303	2.0643e-16	-3.7285	0.00038664	0.00082374	-0.22632
2.04_191.061	-1.1287	-4.1171e-17	-3.7224	0.00039452	0.00083972	-0.24507
1.68_452.149	-1.1272	-1.4849e-16	-3.7162	0.0004027	0.00085632	-0.26415
Dihydroxybenzoic acid 3	-1.1267	-9.2287e-17	-3.7142	0.00040539	0.00086121	-0.27032
1.59_538.123	1.126	8.7893e-18	3.7118	0.00040861	0.00086681	-0.27769
3.69_490.204	-1.126	-1.3976e-16	-3.7116	0.0004088	0.00086681	-0.27812
1.08_254.101	-1.1259	-1.7e-16	-3.7111	0.00040952	0.0008675	-0.27976
Caffeoyl quinic acid	-1.1258	4.5797e-17	-3.7106	0.00041016	0.00086803	-0.2812
3.28_612.248	-1.1245	-6.43e-17	-3.7058	0.0004167	0.00088068	-0.2959
3.44_504.182	-1.1245	-2.9143e-17	-3.7057	0.00041694	0.00088068	-0.29642
1.64_603.177	-1.1243	7.5865e-17	-3.7047	0.00041822	0.00088256	-0.29928
2.99_320.147	-1.1241	7.1933e-17	-3.7039	0.0004193	0.00088399	-0.30167
2.72_590.256	-1.1233	5.181e-17	-3.7011	0.00042319	0.00089135	-0.31025
3.46_666.212	-1.1223	2.0331e-16	-3.6968	0.00042922	0.00090319	-0.32338
3.93_205.955	1.1205	-1.5774e-16	3.69	0.00043897	0.00092283	-0.34424
Quinic acid 2	-1.1199	2.313e-19	-3.6877	0.00044232	0.000929	-0.3513
3.64_174.089	-1.1186	-5.1579e-17	-3.6826	0.00044977	0.00094375	-0.36681
2.74_131.095	-1.1184	-6.326e-17	-3.6818	0.000451	0.00094545	-0.36935
3.04_308.147	-1.1178	-1.1056e-16	-3.6793	0.0004547	0.00095229	-0.37692
Deoxyhexopyranose 2	-1.1177	4.1344e-17	-3.679	0.0004552	0.00095245	-0.37795
2.01_882.262	-1.1176	5.6668e-18	-3.6784	0.00045607	0.00095336	-0.37971
5.87_503.3	-1.117	-2.683e-17	-3.6763	0.00045913	0.00095886	-0.38592
2_532.116	-1.117	3.2382e-18	-3.676	0.00045961	0.00095897	-0.3869
2.77_588.113	-1.1167	4.0014e-17	-3.6752	0.00046092	0.00096079	-0.38953
3.09_480.219	-1.1166	7.7716e-17	-3.6746	0.00046173	0.00096157	-0.39115
1.65_517.142	-1.1152	1.7347e-17	-3.6691	0.00047022	0.00097834	-0.40807
1.6_406.099	-1.1148	-2.3774e-16	-3.6674	0.00047279	0.00098276	-0.41312
2.39_494.121	-1.1135	-1.3603e-16	-3.6625	0.00048041	0.00099768	-0.42797
6.06_1084.67	1.1134	4.6259e-18	3.6622	0.00048098	0.00099791	-0.42905
2.97_384.198	-1.1109	-5.181e-17	-3.6524	0.00049662	0.0010294	-0.45875
1.67_328.075	1.1101	-5.1319e-17	3.6492	0.0005018	0.0010392	-0.46838
1.65_633.11	-1.1094	-3.4926e-17	-3.6466	0.00050607	0.0010471	-0.47624
1.58_375.115	-1.1089	-2.121e-16	-3.6446	0.00050946	0.0010531	-0.48241
4.08_504.219	-1.1072	2.7756e-17	-3.6379	0.00052071	0.0010753	-0.50267
Procyanidin trimer 2	-1.1069	1.5959e-17	-3.6366	0.00052286	0.0010788	-0.50649
3.64_348.178	-1.1067	-3.8627e-17	-3.6361	0.00052382	0.0010797	-0.50818
3.11_480.122	-1.1045	-1.1229e-16	-3.6272	0.00053916	0.0011103	-0.53494
3.04_436.193	-1.1043	-3.4666e-17	-3.6265	0.00054035	0.0011117	-0.53698
4.42_526.261	-1.1034	-3.6545e-17	-3.6231	0.00054644	0.0011232	-0.54737
3.46_372.154	-1.1014	1.9819e-16	-3.6151	0.00056075	0.0011516	-0.57133
Tremuloidin 3 (FA)	-1.101	9.5988e-18	-3.6137	0.00056332	0.0011558	-0.57557
4.75_330.24	1.1006	2.9606e-17	3.612	0.00056656	0.0011614	-0.58087
0.77_490.153	-1.0998	-7.4015e-17	-3.6089	0.00057221	0.0011719	-0.59006
2.06_444.123	-1.0996	-6.4994e-17	-3.6083	0.00057325	0.0011729	-0.59175
Procyanidin trimer 5	-1.0992	-9.6219e-17	-3.6065	0.00057669	0.0011789	-0.5973
1.58_430.168	-1.0985	2.3361e-17	-3.6038	0.00058181	0.0011882	-0.60547
5.1_674.199	-1.0983	2.0932e-17	-3.603	0.00058327	0.0011891	-0.6078
3.46_718.171	-1.0983	-2.0973e-16	-3.603	0.00058329	0.0011891	-0.60783
Anthranilic acid	-1.098	5.5511e-18	-3.6018	0.00058548	0.0011924	-0.6113
Phenol fr 6	-1.0974	1.2189e-16	-3.5996	0.00058967	0.0011999	-0.61791
3.14_408.105	-1.0965	-1.2097e-16	-3.596	0.00059656	0.0012128	-0.62867
2.01_448.121	-1.096	-1.4734e-16	-3.5941	0.00060027	0.0012192	-0.6344
1.73_324.142	-1.0956	6.4879e-17	-3.5925	0.0006034	0.0012244	-0.63922
3.29_622.131	-1.0948	1.4803e-17	-3.5897	0.00060886	0.0012344	-0.64756
5.87_563.322	-1.094	-8.026e-17	-3.5863	0.00061575	0.0012472	-0.65797
5.26_914.277	-1.0937	-2.6614e-17	-3.5853	0.00061767	0.00125	-0.66086
3.42_580.181	-1.0928	-2.0354e-17	-3.5818	0.00062467	0.001263	-0.67129
1.56_369.105	-1.0924	7.3321e-17	-3.5803	0.00062766	0.0012679	-0.67571
4.3_496.25	-1.0921	4.5508e-17	-3.5791	0.0006302	0.0012719	-0.67945
3.19_510.227	-1.0906	-2.5998e-16	-3.5734	0.00064188	0.0012943	-0.69645
2.99_556.178	-1.0901	1.4433e-16	-3.5715	0.00064585	0.0013011	-0.70215
3.72_348.178	-1.0898	1.1565e-16	-3.57	0.0006489	0.001306	-0.70651
3.38_382.183	-1.0895	-9.8995e-17	-3.5692	0.00065067	0.0013084	-0.70903
1.54_204.062	-1.0883	1.343e-16	-3.5644	0.0006607	0.0013274	-0.72318
1.41_486.117	-1.0882	1.249e-16	-3.5638	0.00066201	0.0013281	-0.72501
2.22_344.111	-1.0881	1.434e-17	-3.5637	0.00066227	0.0013281	-0.72538
1.06_122.004	-1.088	3.4232e-17	-3.563	0.0006637	0.0013298	-0.72737
3.21_489.204	-1.0877	1.8648e-16	-3.562	0.00066585	0.0013329	-0.73037
2.71_308.147	-1.0874	-2.8334e-18	-3.561	0.00066819	0.0013364	-0.73361
2.85_510.154	-1.0872	-1.2953e-17	-3.5602	0.00066984	0.0013385	-0.73589
2.88_466.167	-1.0867	-2.2204e-17	-3.558	0.00067452	0.0013466	-0.74233
3.56_634.185	-1.0865	-2.7293e-17	-3.5573	0.00067612	0.0013486	-0.74453
5.56_896.267	-1.086	-1.4468e-16	-3.5556	0.00067976	0.0013546	-0.74949
1.65_539.124	-1.0848	7.309e-17	-3.5508	0.0006903	0.0013744	-0.76372
3.63_490.203	-1.0846	-1.8272e-17	-3.5502	0.00069183	0.0013762	-0.76577
1.41_370.147	-1.0845	-2.9606e-17	-3.5499	0.00069249	0.0013763	-0.76664
0.92_262.949	1.0844	-1.0755e-17	3.5493	0.00069377	0.0013776	-0.76836
3.27_642.143	-1.0834	-5.5511e-17	-3.5453	0.00070274	0.0013942	-0.78023
3.41_582.23	-1.0831	5.9183e-17	-3.5442	0.00070513	0.0013971	-0.78337
0.85_365.086	-1.083	-2.2783e-17	-3.5441	0.00070546	0.0013971	-0.7838
1.93_332.111	1.0826	-7.4015e-17	3.5424	0.00070935	0.0014035	-0.78888
1.12_296.11	-1.0819	-1.8041e-17	-3.5397	0.00071553	0.0014145	-0.79691
1.75_309.061	-1.0818	3.7933e-17	-3.5392	0.00071658	0.0014153	-0.79827
4.25_494.234	-1.081	-9.4369e-17	-3.5363	0.00072321	0.001427	-0.80678
4.62_512.247	-1.081	6.4532e-17	-3.5361	0.0007238	0.001427	-0.80753
2.66_310.126	-1.0804	-2.3847e-16	-3.5339	0.00072901	0.001436	-0.81416
3.49_454.204	-1.0793	9.2519e-19	-3.5295	0.00073917	0.0014547	-0.82694
3.55_716.266	-1.0787	-2.9606e-17	-3.5271	0.00074485	0.0014646	-0.83403
Coumaroyl quinic acid	-1.0782	6.0137e-17	-3.5255	0.00074875	0.001471	-0.83885
5.83_276.208	-1.0776	6.4763e-17	-3.5231	0.00075464	0.001481	-0.84609
1.64_605.154	-1.0775	3.2382e-17	-3.5228	0.00075529	0.001481	-0.84689
Salicylic acid fr 8	-1.0775	-1.7752e-17	-3.5226	0.00075583	0.001481	-0.84755
6.12_294.219	1.0769	1.3878e-17	3.5205	0.00076089	0.0014896	-0.85371
1.31_416.059	-1.0754	-1.9938e-16	-3.5148	0.00077479	0.0015155	-0.87044
0.83_326.121	-1.0751	1.3068e-17	-3.5137	0.00077771	0.0015198	-0.87391
3.47_478.074	-1.0747	-2.3534e-17	-3.5121	0.00078161	0.0015261	-0.87852
3.68_478.111	-1.0743	-8.9642e-17	-3.5105	0.00078568	0.0015327	-0.88332
3.04_378.11	-1.0741	-1.9429e-17	-3.5095	0.00078817	0.0015362	-0.88625
3.56_562.261	-1.0736	4.7647e-17	-3.5076	0.00079295	0.0015442	-0.89183
Coumaric acid glucoside 3	-1.0726	9.7145e-18	-3.504	0.00080202	0.0015605	-0.90233
4.9_194.094	-1.0722	-9.0668e-17	-3.5025	0.00080597	0.0015668	-0.90687
5.87_631.308	-1.0718	6.9852e-17	-3.5008	0.00081036	0.0015739	-0.91189
1.67_324.062	-1.0715	-2.3592e-17	-3.4997	0.00081307	0.0015778	-0.91497
2.39_551.068	-1.0714	9.1593e-17	-3.4993	0.00081412	0.0015785	-0.91616
3.07_404.168	-1.0711	-4.3946e-17	-3.498	0.00081747	0.0015836	-0.91996
1.65_290.1	-1.0709	9.4832e-18	-3.4972	0.00081962	0.0015864	-0.92237
1.24_320.075	-1.0705	8.5001e-17	-3.4959	0.00082316	0.0015918	-0.92635
1.56_412.067	-1.0693	7.0314e-17	-3.4912	0.00083551	0.0016143	-0.9401
5.17_326.201	1.0682	-4.0477e-18	3.4872	0.00084619	0.0016335	-0.95183
3.41_628.234	-1.0681	6.8232e-17	-3.4867	0.00084754	0.0016347	-0.9533
1.59_336.106	-1.0678	5.1117e-17	-3.4856	0.00085064	0.0016393	-0.95667
2.61_326.056	-1.0659	-4.5103e-17	-3.4782	0.00087075	0.0016757	-0.97822
2.2_111.032	-1.0659	-4.915e-18	-3.4781	0.00087106	0.0016757	-0.97855
2.87_450.119	-1.0655	-8.2573e-17	-3.4766	0.00087511	0.001682	-0.98283
3.98_438.21	1.0643	-1.6769e-17	3.4719	0.00088826	0.0017058	-0.99659
3.6_478.24	-1.0635	5.9443e-17	-3.469	0.00089649	0.0017201	-1.0051
4.44_281.991	-1.0632	-7.2743e-17	-3.4678	0.00090006	0.0017255	-1.0088
3.23_286.141	-1.0615	3.6314e-17	-3.4615	0.0009182	0.0017576	-1.0272
3.69_452.078	-1.0615	8.1416e-17	-3.4614	0.00091837	0.0017576	-1.0273
3.93_580.264	1.0594	-3.5591e-17	3.4536	0.00094155	0.0018004	-1.0503
3.03_407.064	-1.0593	3.1456e-17	-3.453	0.00094334	0.0018023	-1.0521
3.29_620.18	-1.0579	1.0379e-17	-3.4475	0.00095967	0.0018319	-1.0679
3.2_354.189	-1.0571	3.6892e-17	-3.4448	0.00096809	0.0018464	-1.0759
3.99_344.219	-1.0568	-1.434e-17	-3.4435	0.00097197	0.0018522	-1.0796
2.93_604.108	-1.0552	-7.1702e-17	-3.4375	0.0009906	0.0018861	-1.0971
3.71_482.199	1.0507	-1.9021e-16	3.4202	0.0010461	0.0019901	-1.1474
3.68_444.197	-1.0504	6.7076e-17	-3.419	0.0010502	0.001996	-1.1509
Shikimic acid	-1.0494	-4.8341e-17	-3.4155	0.0010617	0.0020163	-1.161
1.08_208.095	-1.049	-2.2667e-17	-3.4137	0.0010678	0.002026	-1.1662
3.77_2124.1	-1.0482	1.7739e-16	-3.4107	0.0010779	0.0020436	-1.1749
5.22_284.117	-1.0468	-3.562e-17	-3.4056	0.0010952	0.0020744	-1.1895
2.88_383.122	-1.0417	-1.9669e-16	-3.3862	0.0011638	0.0022026	-1.2455
1.37_135.054	1.0415	6.1987e-17	3.3853	0.0011672	0.0022072	-1.2482
2.68_294.131	-1.0409	-8.691e-17	-3.3833	0.0011744	0.0022189	-1.2538
4.11_468.22	-1.0401	-9.2519e-18	-3.38	0.0011867	0.0022401	-1.2634
1.57_398.089	-1.0392	1.6746e-16	-3.3768	0.0011986	0.0022608	-1.2726
2.39_520.139	-1.0389	-1.3068e-17	-3.3757	0.0012026	0.0022663	-1.2756
1.66_132.042	1.0381	-6.4908e-17	3.3726	0.0012144	0.0022866	-1.2846
3.51_520.193	-1.0371	1.7116e-17	-3.3687	0.0012291	0.0023124	-1.2957
6.35_314.246	-1.0356	8.3267e-17	-3.3632	0.0012505	0.0023487	-1.3115
3.48_720.152	-1.0356	4.1633e-18	-3.3632	0.0012505	0.0023487	-1.3116
2.98_336.142	-1.0355	1.2027e-17	-3.3628	0.0012521	0.0023496	-1.3127
1.68_406.069	-1.0345	-3.4694e-17	-3.3589	0.0012674	0.0023764	-1.3239
1.6_130.063	-1.0323	-3.5198e-16	-3.3507	0.0013001	0.0024355	-1.3472
6.39_530.308	-1.0318	8.4886e-17	-3.3488	0.0013077	0.0024467	-1.3526
3.44_526.197	1.0318	1.1981e-16	3.3487	0.0013082	0.0024467	-1.353
5.44_264.172	-1.0316	1.4183e-16	-3.3481	0.0013107	0.0024493	-1.3547
2.48_349.137	-1.0295	-1.5497e-17	-3.3401	0.0013436	0.0025087	-1.3775
3.29_118.042	-1.025	-2.9328e-16	-3.3233	0.0014153	0.0026403	-1.4252
1.93_383.106	-1.0243	-4.8248e-16	-3.3208	0.0014265	0.0026589	-1.4324
3.44_468.173	-1.0238	3.0517e-17	-3.3189	0.0014349	0.0026724	-1.4379
3.07_131.095	-1.023	-1.722e-16	-3.3159	0.001448	0.0026946	-1.4462
4.83_338.115	-1.0227	6.4532e-17	-3.3146	0.0014538	0.002703	-1.4498
2.87_577.088	-1.0215	-8.6967e-17	-3.3103	0.0014735	0.0027375	-1.4622
Coumaric acid 1	-1.0213	-6.9389e-18	-3.3094	0.0014776	0.0027427	-1.4647
3.1_436.194	-1.0203	5.9674e-17	-3.3055	0.0014952	0.0027731	-1.4756
1.41_416.151	-1.0182	3.2613e-17	-3.2979	0.0015309	0.0028366	-1.4973
2.03_310.127	-1.0182	-7.841e-17	-3.2976	0.001532	0.0028366	-1.4979
5.13_914.277	-1.0172	-3.6545e-17	-3.294	0.0015494	0.0028663	-1.5083
6.16_477.285	1.0151	-1.8226e-16	3.2861	0.0015873	0.0029341	-1.5304
1.25_356.132	-1.0139	-1.6191e-16	-3.2816	0.0016094	0.0029723	-1.5431
0.65_252.048	-1.0134	8.1763e-17	-3.28	0.0016172	0.0029844	-1.5475
6.08_613.258	1.013	1.3503e-16	3.2783	0.001626	0.002998	-1.5525
1.91_355.999	-1.011	-1.4277e-16	-3.271	0.0016627	0.0030632	-1.5729
3.09_682.245	-1.0109	-9.2519e-18	-3.2707	0.0016643	0.0030636	-1.5738
5.07_381.978	-1.01	7.0083e-17	-3.2673	0.0016817	0.003093	-1.5833
5.41_568.173	-1.0092	1.4109e-17	-3.2643	0.001697	0.0031186	-1.5916
1.97_360.105	-1.0086	-2.5119e-16	-3.2619	0.0017096	0.0031393	-1.5984
Arbutin/hydroquinone glucoside 1 (FA)	1.0076	-6.1409e-17	3.2581	0.0017293	0.0031728	-1.6089
1.91_334.97	-1.0067	2.5674e-16	-3.2547	0.0017474	0.0032034	-1.6184
3.23_668.186	-1.0064	-1.4314e-16	-3.2539	0.0017521	0.0032093	-1.6209
6.1_650.363	1.0052	8.876e-17	3.2494	0.0017761	0.0032506	-1.6334
3.94_476.186	1.0023	3.2497e-17	3.2385	0.0018364	0.0033582	-1.6639
4.8_252.135	-1.0018	3.3214e-16	-3.2366	0.0018468	0.0033744	-1.6691
3.96_494.233	-1.0012	-4.1633e-17	-3.2345	0.0018585	0.003393	-1.6748
3.99_490.204	-1	-6.3375e-17	-3.2301	0.001884	0.0034367	-1.6873
3.43_488.098	-0.99989	-4.6259e-17	-3.2296	0.0018864	0.0034383	-1.6885
6.08_607.243	0.99948	-6.4647e-17	3.2281	0.0018954	0.0034518	-1.6928
5.31_630.206	-0.99897	-5.7549e-17	-3.2262	0.0019062	0.0034686	-1.698
2.67_496.177	-0.99861	-9.1825e-17	-3.2249	0.0019138	0.0034797	-1.7017
4.05_566.203	-0.99846	-1.2403e-17	-3.2243	0.0019172	0.0034829	-1.7033
3.76_1063.059	-0.99635	-1.8041e-16	-3.2165	0.0019633	0.0035638	-1.725
6.08_976.551	0.99618	2.7871e-17	3.2159	0.0019669	0.0035675	-1.7267
3.09_728.252	-0.99491	-8.211e-18	-3.2111	0.0019952	0.0036159	-1.7397
3.98_468.22	0.99466	-9.4832e-18	3.2102	0.0020008	0.003623	-1.7423
3.52_362.158	-0.99377	-8.928e-17	-3.2069	0.0020209	0.0036565	-1.7514
3.75_350.023	-0.99262	1.0778e-16	-3.2027	0.0020469	0.0037004	-1.7631
4.2_498.23	-0.99222	9.2519e-18	-3.2012	0.0020561	0.003713	-1.7672
3.61_406.182	-0.99218	3.8858e-17	-3.201	0.0020572	0.003713	-1.7677
2.98_484.214	-0.9912	3.8106e-17	-3.1974	0.0020797	0.0037505	-1.7776
0.51_231.919	-0.99109	-1.8504e-17	-3.197	0.0020823	0.0037522	-1.7788
1.11_303.096	-0.99055	-9.7145e-17	-3.195	0.0020948	0.0037717	-1.7842
3.98_552.202	0.99028	3.8627e-17	3.194	0.0021013	0.0037802	-1.787
3.42_406.09	-0.98961	2.2074e-17	-3.1916	0.0021169	0.0038053	-1.7938
4.17_424.231	-0.9895	2.646e-16	-3.1912	0.0021195	0.0038068	-1.7949
3.76_352.088	-0.98755	-1.0045e-16	-3.184	0.0021661	0.0038875	-1.8148
3.94_554.183	0.98693	-3.1919e-17	3.1817	0.002181	0.003911	-1.821
Salicin 1	-0.98635	5.9212e-17	-3.1795	0.0021952	0.0039333	-1.827
1.51_340.136	-0.98544	1.2953e-17	-3.1762	0.0022175	0.00397	-1.8362
Pyrogallol	-0.98476	5.3487e-18	-3.1737	0.0022342	0.0039956	-1.843
1.68_498.158	-0.98471	-3.7007e-17	-3.1735	0.0022354	0.0039956	-1.8435
3.76_482.09	-0.9837	-1.9128e-16	-3.1698	0.0022607	0.0040363	-1.8538
2.73_589.162	-0.98363	-1.0177e-17	-3.1695	0.0022625	0.0040363	-1.8545
0.5_304.079	-0.98358	-6.7163e-17	-3.1693	0.0022636	0.0040363	-1.855
3.44_354.111	-0.98319	3.2382e-17	-3.1679	0.0022733	0.0040504	-1.8589
5.47_602.327	-0.98221	2.9249e-16	-3.1643	0.0022981	0.0040913	-1.8688
2.75_444.125	-0.98171	1.1819e-16	-3.1624	0.002311	0.0041109	-1.8739
3.97_424.171	-0.98142	-2.5674e-17	-3.1614	0.0023184	0.0041207	-1.8768
3.01_394.183	-0.98122	7.0777e-17	-3.1606	0.0023235	0.0041265	-1.8788
6.15_996.616	0.98085	-1.1507e-17	3.1593	0.0023328	0.0041374	-1.8825
6.13_521.275	0.98084	2.5211e-17	3.1592	0.0023333	0.0041374	-1.8826
3.98_422.214	0.98044	-3.7933e-17	3.1578	0.0023435	0.0041521	-1.8866
3.29_585.205	-0.98029	-7.9566e-17	-3.1572	0.0023475	0.0041559	-1.8882
5.56_776.246	-0.97941	4.3021e-17	-3.154	0.0023703	0.0041929	-1.897
3.93_580.265	0.97843	-8.9049e-17	3.1504	0.002396	0.004235	-1.9068
0.77_270.078	-0.97821	1.2811e-16	-3.1496	0.0024018	0.0042418	-1.909
1.22_212.08	-0.97747	-1.1519e-16	-3.1469	0.0024214	0.0042731	-1.9164
3.79_336.177	-0.97621	-1.0304e-16	-3.1422	0.0024553	0.0043295	-1.9291
5.21_581.331	0.97541	-3.9436e-17	3.1393	0.0024768	0.0043639	-1.937
0.92_173.963	0.97226	-2.5472e-17	3.1277	0.0025636	0.0045133	-1.9684
3.01_440.189	-0.97215	-1.7949e-16	-3.1273	0.0025669	0.0045156	-1.9696
1.86_513.184	0.97109	1.3623e-16	3.1234	0.0025968	0.0045644	-1.9801
1.81_227.043	0.96771	-1.3485e-16	3.1111	0.002694	0.0047316	-2.0136
5.64_272.198	-0.96689	-2.6738e-16	-3.1081	0.0027181	0.0047701	-2.0217
2.14_322.036	-0.9668	2.2204e-17	-3.1077	0.0027209	0.0047713	-2.0226
1.85_117.079	-0.96637	-1.1796e-17	-3.1062	0.0027335	0.0047895	-2.0268
0.75_134.058	0.96572	-9.5468e-17	3.1038	0.002753	0.0048199	-2.0333
3.76_480.09	-0.96429	-7.1153e-17	-3.0986	0.002796	0.0048914	-2.0474
6.11_527.32	-0.96288	-8.4748e-17	-3.0934	0.002839	0.0049627	-2.0613
3.59_398.167	-0.96274	1.7486e-16	-3.0929	0.0028432	0.0049662	-2.0626
3.94_482.236	-0.96154	2.3592e-17	-3.0885	0.0028803	0.0050258	-2.0744
1.93_497.155	-0.96149	-5.6783e-17	-3.0883	0.0028819	0.0050258	-2.0749
2.12_143.073	0.96103	-7.3899e-17	3.0867	0.0028963	0.0050469	-2.0794
6.16_577.208	0.96095	-9.0206e-17	3.0864	0.0028988	0.0050472	-2.0802
5.36_431.98	-0.96011	4.3067e-16	-3.0833	0.0029251	0.0050892	-2.0884
Caffeoyl salicin	-0.95982	-1.5497e-17	-3.0823	0.002934	0.0050977	-2.0912
1.64_162.053	-0.95981	7.8641e-18	-3.0822	0.0029346	0.0050977	-2.0914
3.23_615.213	-0.95924	-9.8879e-18	-3.0801	0.0029526	0.005125	-2.0969
2.62_472.214	-0.95788	-1.3129e-16	-3.0752	0.0029959	0.0051961	-2.1102
1.65_389.017	-0.95673	-2.1279e-17	-3.071	0.0030333	0.0052567	-2.1214
Deoxystrigol-like 1	-0.9565	6.5919e-17	-3.0702	0.0030406	0.0052654	-2.1236
4.1_718.228	-0.95612	-1.101e-16	-3.0688	0.0030531	0.0052828	-2.1273
1.22_246.005	-0.95523	-1.4803e-17	-3.0655	0.0030826	0.0053297	-2.1361
3.29_612.205	-0.95446	-7.9508e-17	-3.0628	0.0031079	0.0053693	-2.1435
0.67_148.037	-0.95397	2.3592e-17	-3.0609	0.0031245	0.0053937	-2.1483
3.64_432.105	-0.95328	5.0885e-18	-3.0585	0.0031475	0.0054292	-2.155
3.16_436.193	-0.95311	2.3448e-17	-3.0578	0.0031533	0.0054351	-2.1567
Dihydrophaseic acid	0.95276	6.06e-17	3.0566	0.0031651	0.0054512	-2.1601
6.25_251.152	-0.95214	5.7824e-17	-3.0543	0.0031861	0.0054831	-2.1661
1.92_354.152	-0.95092	-1.2004e-16	-3.0499	0.0032277	0.0055504	-2.1778
3.76_340.032	-0.9503	-9.3444e-17	-3.0476	0.0032491	0.0055828	-2.1838
3.07_382.183	-0.95021	1.7579e-17	-3.0473	0.0032523	0.005584	-2.1847
3.01_434.214	-0.94946	-5.0885e-17	-3.0446	0.0032782	0.0056241	-2.1919
1.83_478.037	-0.94919	5.4109e-17	-3.0436	0.0032877	0.0056361	-2.1946
5.24_326.195	0.94905	1.2929e-16	3.0431	0.0032928	0.0056404	-2.1959
5.45_195.09	-0.94753	-1.7023e-16	-3.0376	0.0033464	0.0057278	-2.2106
3.09_434.213	-0.94702	-9.4832e-18	-3.0357	0.0033644	0.0057542	-2.2155
4.1_614.219	0.94685	2.2505e-16	3.0351	0.0033706	0.0057587	-2.2171
3.65_554.145	-0.9468	5.2389e-17	-3.0349	0.0033722	0.0057587	-2.2176
3.15_480.219	-0.94476	-1.5821e-16	-3.0275	0.0034461	0.0058804	-2.2372
1.93_314.064	-0.94443	2.6599e-17	-3.0263	0.0034583	0.0058966	-2.2404
3.52_172.073	-0.94264	-9.2793e-17	-3.0199	0.003524	0.0060041	-2.2575
2.73_640.16	-0.94228	-1.1287e-16	-3.0185	0.0035377	0.0060228	-2.261
3.21_538.201	-0.9415	-1.2953e-17	-3.0157	0.0035669	0.0060678	-2.2685
4-hydroxyacetophenone fr 1	-0.9407	-4.3484e-17	-3.0128	0.0035971	0.0061121	-2.2761
0.5_322.088	-0.94066	8.5406e-17	-3.0127	0.0035985	0.0061121	-2.2764
3.23_590.195	-0.93988	2.535e-16	-3.0099	0.0036284	0.0061582	-2.2839
1.57_338.078	-0.93939	-7.8525e-17	-3.0081	0.0036471	0.0061853	-2.2886
3.14_483.173	-0.9375	1.9105e-16	-3.0013	0.00372	0.0062993	-2.3065
6.32_280.17	-0.93745	6.9389e-18	-3.0011	0.003722	0.0062993	-2.307
0.56_270.095	-0.93739	9.7491e-17	-3.0009	0.0037245	0.0062993	-2.3076
2.96_296.09	-0.93736	-1.0825e-16	-3.0008	0.0037257	0.0062993	-2.3079
3.75_197.961	-0.93705	7.3205e-17	-2.9996	0.0037377	0.0063149	-2.3108
2.87_306.078	-0.93286	1.6353e-16	-2.9845	0.0039051	0.0065927	-2.3505
6.15_1064.602	0.93278	-1.0095e-16	2.9842	0.0039086	0.0065935	-2.3513
3.58_354.129	-0.93104	-2.0123e-16	-2.978	0.0039799	0.0067087	-2.3676
0.55_324.036	0.93041	-1.3138e-16	2.9757	0.0040061	0.0067478	-2.3736
1.57_463.073	-0.92803	-2.2667e-17	-2.9671	0.0041065	0.0069116	-2.396
3.3_466.112	-0.92711	-1.0802e-16	-2.9638	0.004146	0.0069729	-2.4046
1.23_472.178	-0.92652	-7.7773e-17	-2.9617	0.0041715	0.0070104	-2.4101
1.53_418.068	-0.9252	-6.06e-17	-2.9569	0.004229	0.0071016	-2.4225
1.22_261.976	-0.92414	-1.1565e-17	-2.9532	0.0042753	0.007174	-2.4324
3.72_416.203	-0.92327	-7.1008e-17	-2.95	0.0043141	0.0072311	-2.4405
3.29_636.201	-0.92323	1.3739e-16	-2.9499	0.0043159	0.0072311	-2.4409
1.22_204.021	-0.92179	-1.0085e-16	-2.9447	0.0043805	0.0073339	-2.4543
1.92_366.062	-0.91963	-5.5742e-17	-2.937	0.0044788	0.0074927	-2.4743
0.86_178.048	-0.91934	3.8858e-17	-2.9359	0.0044922	0.0075095	-2.477
2.78_301.116	-0.9184	-4.3599e-17	-2.9326	0.0045358	0.0075768	-2.4858
1.22_188.049	-0.91832	-2.0875e-16	-2.9323	0.0045397	0.0075776	-2.4865
5.76_276.172	-0.91753	1.8429e-16	-2.9294	0.0045764	0.0076331	-2.4938
6.16_543.256	0.91726	3.3769e-17	2.9285	0.0045891	0.0076484	-2.4963
1.21_417.011	0.91659	-1.914e-17	2.9261	0.0046209	0.0076957	-2.5025
6.06_565.338	0.91637	-3.4139e-16	2.9253	0.0046314	0.0077074	-2.5046
0.92_283.978	0.91393	1.471e-16	2.9165	0.0047482	0.0078959	-2.5271
2.12_402.073	-0.91147	-4.279e-17	-2.9078	0.0048687	0.0080901	-2.5496
4.39_210.1	-0.91135	1.5589e-16	-2.9073	0.0048748	0.0080943	-2.5508
4.52_216.136	-0.90817	8.5291e-17	-2.896	0.0050351	0.0083542	-2.5799
2.73_446.177	-0.90798	-9.4832e-17	-2.8953	0.0050447	0.0083639	-2.5816
1.31_220.058	-0.90742	-4.6259e-18	-2.8933	0.0050735	0.0084054	-2.5868
3.75_556.179	-0.90699	-3.747e-17	-2.8918	0.0050952	0.0084351	-2.5906
3.07_125.055	-0.90581	-2.2635e-16	-2.8875	0.0051567	0.0085305	-2.6014
2.66_378.113	-0.90523	5.8402e-17	-2.8855	0.0051872	0.0085746	-2.6067
4.48_372.048	-0.90254	1.4953e-16	-2.8759	0.0053298	0.0088037	-2.6311
4.09_538.223	-0.9021	-6.245e-18	-2.8743	0.0053534	0.0088361	-2.6351
5.66_830.421	-0.90189	9.6913e-17	-2.8736	0.005365	0.0088487	-2.6371
2.45_349.988	-0.90107	-7.4477e-17	-2.8707	0.0054092	0.008915	-2.6444
2.14_206.079	-0.89785	-2.779e-16	-2.8592	0.0055872	0.0092015	-2.6736
0.65_134.058	-0.89767	-4.1865e-17	-2.8586	0.005597	0.0092107	-2.6751
3.2_408.199	-0.89625	2.0354e-17	-2.8535	0.0056771	0.0093309	-2.6879
1.5_190.048	-0.89623	5.0654e-17	-2.8534	0.0056784	0.0093309	-2.6881
5.17_270.139	-0.89462	-2.8334e-16	-2.8477	0.0057704	0.009475	-2.7025
3.08_476.152	-0.89442	4.9613e-17	-2.847	0.0057818	0.0094867	-2.7043
1.74_350.085	-0.89429	-2.1973e-16	-2.8466	0.0057893	0.009492	-2.7055
4.15_430.147	-0.89308	1.5312e-16	-2.8422	0.00586	0.0096008	-2.7164
5.77_310.214	0.893	-3.7007e-17	2.842	0.0058644	0.0096009	-2.7171
6.37_244.203	-0.89152	1.8735e-17	-2.8367	0.0059513	0.009736	-2.7303
2.05_362.085	0.89054	1.3646e-17	2.8332	0.00601	0.0098249	-2.7391
1.3_416.153	-0.8902	-9.4832e-18	-2.8321	0.0060298	0.00985	-2.742
Procyanidin trimer 4	-0.88971	-6.0137e-17	-2.8303	0.0060596	0.0098894	-2.7465
3.76_291.11	-0.88965	3.6036e-16	-2.8301	0.0060628	0.0098894	-2.7469
4.02_488.204	0.88927	-9.8301e-17	2.8287	0.0060861	0.0099201	-2.7504
3.2_628.235	-0.88754	7.3899e-17	-2.8226	0.0061911	0.010084	-2.7657
4.68_380.204	-0.88731	1.9151e-16	-2.8218	0.0062055	0.0101	-2.7678
6.06_505.317	0.88717	2.3373e-16	2.8213	0.0062137	0.010106	-2.769
1.65_238.96	-0.88555	2.04e-16	-2.8156	0.0063142	0.010262	-2.7834
5.78_684.363	-0.88497	-2.6535e-16	-2.8135	0.0063506	0.010313	-2.7885
6.14_1040.605	0.88431	1.4271e-16	2.8112	0.0063921	0.010373	-2.7944
3.03_352.172	-0.88359	3.8858e-17	-2.8087	0.0064374	0.010439	-2.8007
5.07_445.979	-0.88287	-8.7661e-17	-2.8061	0.0064832	0.010506	-2.8071
4.77_331.987	-0.88099	-2.1464e-16	-2.7995	0.0066042	0.010694	-2.8236
5.24_776.244	-0.88026	-1.2921e-16	-2.7969	0.0066519	0.010763	-2.8301
3.97_532.214	-0.8791	3.7933e-17	-2.7928	0.0067279	0.010878	-2.8403
5.02_316.188	-0.87791	-1.0813e-16	-2.7886	0.0068069	0.010998	-2.8507
3.51_666.243	-0.87782	-6.6151e-17	-2.7883	0.0068129	0.011	-2.8515
3.52_128.084	-0.87685	-2.7015e-16	-2.7848	0.0068778	0.011096	-2.86
2.89_440.186	-0.87637	-9.6219e-17	-2.7832	0.00691	0.01114	-2.8642
5.29_238.123	-0.87574	2.55e-17	-2.7809	0.0069526	0.011201	-2.8697
3.76_100.072	-0.87555	8.3267e-18	-2.7803	0.0069657	0.011214	-2.8714
2.78_347.122	-0.87424	-7.9797e-18	-2.7756	0.0070552	0.01135	-2.8828
5.55_267.109	-0.87162	-3.6707e-16	-2.7664	0.0072374	0.011634	-2.9056
1.68_347.12	-0.87095	-1.7116e-17	-2.764	0.0072849	0.011702	-2.9114
6.18_244.203	-0.87084	2.6877e-16	-2.7637	0.0072923	0.011706	-2.9124
3.29_638.179	-0.86982	3.3769e-17	-2.7601	0.0073648	0.011814	-2.9212
3.2_370.126	-0.86923	7.8178e-17	-2.758	0.0074072	0.011873	-2.9263
5.79_508.338	0.86901	1.4895e-16	2.7572	0.0074231	0.01189	-2.9282
1.41_433.155	-0.86853	5.6436e-17	-2.7555	0.0074576	0.011928	-2.9324
3.53_456.22	-0.86853	6.6613e-17	-2.7555	0.0074579	0.011928	-2.9324
1.89_322.126	-0.86843	-1.2033e-16	-2.7552	0.007465	0.011931	-2.9333
3.76_488.083	-0.86775	-6.3144e-17	-2.7528	0.0075143	0.012001	-2.9392
3.2_454.208	-0.86763	2.5905e-17	-2.7524	0.0075229	0.012006	-2.9402
3.51_712.256	-0.86751	1.1102e-17	-2.752	0.0075316	0.012012	-2.9412
3.91_558.24	-0.86741	1.8966e-17	-2.7516	0.0075388	0.012014	-2.9421
1.22_232.017	-0.86421	-3.5273e-17	-2.7404	0.0077752	0.012382	-2.9697
1.68_404.091	-0.86381	5.1695e-17	-2.739	0.0078052	0.012421	-2.9731
4.6_676.214	-0.86372	-5.2736e-17	-2.7386	0.0078121	0.012423	-2.9739
2.98_388.172	-0.86334	6.9389e-18	-2.7373	0.0078409	0.01246	-2.9772
4.01_215.152	-0.86244	-4.6491e-17	-2.7342	0.0079088	0.012559	-2.9849
3.33_262.098	0.86216	5.9212e-17	2.7332	0.00793	0.012584	-2.9872
0.92_260.014	0.86174	1.1866e-16	2.7317	0.0079625	0.012626	-2.9909
6.24_543.256	0.86106	-2.313e-17	2.7293	0.0080139	0.012693	-2.9966
1.59_233.065	0.86103	-6.2681e-17	2.7292	0.0080163	0.012693	-2.9969
3.76_98.067	-0.86043	-2.5269e-16	-2.7271	0.0080631	0.012758	-3.0021
4.83_230.152	-0.86026	1.5254e-16	-2.7265	0.0080758	0.012769	-3.0035
2.65_458.198	0.8599	-7.9161e-17	2.7253	0.0081038	0.012805	-3.0066
5.17_208.146	-0.8598	-2.0539e-16	-2.7249	0.0081117	0.012808	-3.0075
3.09_504.181	-0.8586	-1.7925e-18	-2.7207	0.0082051	0.012946	-3.0177
1.54_386.141	-0.85809	1.4919e-17	-2.7189	0.0082456	0.013001	-3.0221
1.59_162.053	-0.85779	-3.0184e-17	-2.7179	0.0082689	0.013028	-3.0246
3.99_504.214	-0.85722	2.4951e-17	-2.7159	0.0083143	0.013091	-3.0295
4.63_243.184	-0.85642	1.1553e-16	-2.7131	0.0083784	0.013182	-3.0363
0.56_208.058	-0.85619	1.2594e-16	-2.7123	0.0083966	0.013201	-3.0383
2.41_402.075	-0.85565	-3.8858e-17	-2.7104	0.0084399	0.01326	-3.0428
2.12_236.079	0.85351	1.5821e-16	2.7029	0.0086138	0.013524	-3.061
1.21_493.179	-0.85314	1.0177e-17	-2.7016	0.0086439	0.013561	-3.0641
3.76_144.062	-0.85293	3.5273e-17	-2.7009	0.0086614	0.013579	-3.0659
Coumarin 2	-0.8526	1.1935e-16	-2.6997	0.008688	0.013611	-3.0687
6.16_561.246	0.85093	-5.5742e-17	2.6939	0.0088269	0.013819	-3.0828
Epigallocatechin 2	-0.84914	-2.5211e-16	-2.6876	0.0089778	0.014046	-3.0979
Homogentisic acid/Hydroxymethoxybenzoic acid fr 1	-0.84715	2.8103e-17	-2.6807	0.0091488	0.014303	-3.1147
6.06_555.308	0.84633	-7.494e-17	2.6778	0.0092196	0.014404	-3.1215
3.44_602.16	-0.84621	3.4509e-16	-2.6774	0.0092298	0.014409	-3.1225
6.16_280.241	0.84604	3.2382e-17	2.6768	0.009245	0.014423	-3.124
3.76_338.032	-0.84525	7.0343e-17	-2.6741	0.0093138	0.01452	-3.1306
5.89_286.214	-0.84332	-5.6436e-17	-2.6673	0.0094839	0.014773	-3.1467
6.24_521.275	0.84326	-7.8525e-17	2.6671	0.0094893	0.014773	-3.1472
5.8_240.075	-0.84211	-7.1239e-17	-2.6631	0.0095929	0.014924	-3.1568
5.41_225.1	-0.84201	1.6653e-16	-2.6628	0.0096018	0.014927	-3.1576
3.19_296.147	-0.84095	-3.7933e-17	-2.6591	0.0096978	0.015066	-3.1665
3.07_169.045	-0.84072	-1.4017e-16	-2.6583	0.0097187	0.015088	-3.1684
6.06_679.315	0.84039	8.0491e-17	2.6571	0.0097485	0.015123	-3.1711
3.98_422.215	0.83929	-4.1633e-17	2.6533	0.0098492	0.015269	-3.1802
1.49_176.032	-0.83863	-4.3209e-17	-2.651	0.00991	0.015353	-3.1857
4-hydroxyacetophenone fr 2	0.83821	-3.8742e-17	2.6495	0.0099494	0.015393	-3.1892
0.92_233.995	0.8382	1.8749e-17	2.6495	0.0099501	0.015393	-3.1893
1.91_278.022	-0.83794	-4.811e-17	-2.6486	0.0099742	0.01542	-3.1914
1.31_172.085	-0.83582	2.4587e-16	-2.6412	0.010174	0.015717	-3.209
3.29_360.156	-0.83537	-1.8457e-16	-2.6397	0.010216	0.015772	-3.2127
3.93_484.216	0.83509	2.9485e-16	2.6387	0.010242	0.015801	-3.215
0.92_201.979	0.83498	1.648e-17	2.6383	0.010253	0.015807	-3.2159
2.75_464.149	-0.83368	-1.5185e-16	-2.6338	0.010378	0.015988	-3.2266
5.22_493.279	0.83295	6.5919e-18	2.6313	0.010449	0.016086	-3.2327
3.3_472.159	-0.83224	6.6613e-17	-2.6288	0.010517	0.016177	-3.2384
5.38_258.183	-0.83219	2.313e-17	-2.6286	0.010522	0.016177	-3.2389
5.96_396.114	-0.83204	-4.6259e-19	-2.6281	0.010537	0.016189	-3.2402
2.01_204.064	-0.83167	1.8851e-16	-2.6268	0.010573	0.016233	-3.2432
Sinapoyl alcohol	-0.8306	1.9429e-17	-2.6231	0.010679	0.016384	-3.252
5.71_416.328	-0.82988	5.0885e-18	-2.6206	0.01075	0.016481	-3.2579
1.5_477.183	-0.82875	1.8469e-16	-2.6167	0.010862	0.016642	-3.2671
1.63_468.144	0.82846	3.1919e-17	2.6157	0.010892	0.016657	-3.2695
1.59_338.12	-0.82845	5.3198e-17	-2.6157	0.010893	0.016657	-3.2695
3.47_378.188	-0.82843	-1.0674e-16	-2.6156	0.010895	0.016657	-3.2697
1.91_306.017	-0.82708	-1.3138e-16	-2.6109	0.011031	0.016854	-3.2808
1.22_160.004	-0.82416	3.2382e-17	-2.6008	0.011331	0.017301	-3.3045
0.82_116.01	-0.82285	-1.3043e-16	-2.5963	0.011468	0.017497	-3.3151
0.92_206	0.81993	1.0245e-16	2.5862	0.011779	0.017958	-3.3388
1.68_360.063	-0.81985	3.4694e-18	-2.5859	0.011787	0.017958	-3.3394
6.13_439.269	0.81979	1.2837e-16	2.5857	0.011794	0.017958	-3.3399
3.93_474.187	0.81953	6.3607e-18	2.5848	0.011822	0.017988	-3.342
1.22_378.024	-0.81941	9.9457e-18	-2.5844	0.011835	0.017996	-3.343
3.23_588.196	-0.81927	3.5706e-17	-2.5839	0.01185	0.018006	-3.3441
5.96_700.233	-0.81791	-4.1633e-18	-2.5792	0.011998	0.018218	-3.3551
2.02_494.162	-0.8178	1.0443e-16	-2.5788	0.01201	0.018224	-3.356
3.76_282.985	-0.81772	1.8631e-16	-2.5785	0.012019	0.018226	-3.3566
2.43_546.215	-0.8171	-2.8103e-17	-2.5764	0.012087	0.018316	-3.3616
0.56_224.089	-0.81621	2.498e-17	-2.5733	0.012185	0.018452	-3.3688
3.79_308.009	-0.81526	3.9899e-17	-2.5701	0.012291	0.018599	-3.3764
3.22_558.185	-0.81381	-3.2129e-17	-2.5651	0.012453	0.018832	-3.388
Catechol/Hydroquinone 2	-0.81305	6.1987e-17	-2.5624	0.01254	0.018951	-3.3941
0.56_99.032	0.81214	1.02e-16	2.5593	0.012644	0.019094	-3.4014
3.15_296.09	-0.81166	3.0069e-17	-2.5577	0.012698	0.019163	-3.4051
4.77_395.983	-0.81068	1.5266e-16	-2.5543	0.012811	0.019321	-3.4129
6.06_582.326	0.81039	-2.2968e-16	2.5533	0.012845	0.019359	-3.4153
2.8_547.15	-0.81028	-3.7007e-17	-2.5529	0.012857	0.019364	-3.4161
0.56_369.012	-0.8091	-1.7579e-17	-2.5489	0.012995	0.019559	-3.4255
3.76_342.027	-0.80878	2.0562e-16	-2.5477	0.013033	0.019592	-3.4281
1.21_429.099	-0.8087	4.874e-16	-2.5475	0.013042	0.019592	-3.4287
5.96_1187.156	-0.80869	-3.7817e-17	-2.5474	0.013044	0.019592	-3.4288
3.76_308.072	-0.80643	-6.8892e-16	-2.5397	0.013311	0.01998	-3.4467
6.06_1152.655	0.80627	-6.2913e-17	2.5391	0.01333	0.019995	-3.448
6.01_330.196	-0.80615	9.7491e-17	-2.5387	0.013345	0.020003	-3.4489
4.33_229.168	-0.8036	-1.4757e-16	-2.53	0.013653	0.020452	-3.4691
4.11_302.095	-0.8032	2.313e-17	-2.5286	0.013702	0.020511	-3.4722
3.23_666.211	-0.80219	-1.5034e-17	-2.5251	0.013826	0.020684	-3.4802
1_176.032	-0.80209	-2.5674e-17	-2.5248	0.013838	0.020688	-3.4809
5.13_237.149	-0.80047	-7.4824e-17	-2.5192	0.014041	0.020976	-3.4937
6.06_633.324	0.80024	-2.4142e-17	2.5184	0.01407	0.021005	-3.4955
2.99_398.178	0.79858	-1.1102e-17	2.5127	0.014279	0.021303	-3.5085
1.64_581.195	-0.79829	-2.8681e-17	-2.5117	0.014316	0.021345	-3.5108
5.96_334.143	-0.79766	-7.8178e-17	-2.5095	0.014397	0.02145	-3.5157
dinor-12-oxo-phytodienoic acid	-0.79728	-1.8828e-16	-2.5082	0.014445	0.021508	-3.5187
3.24_386.121	-0.79709	-6.6151e-17	-2.5076	0.014469	0.02153	-3.5202
3.21_582.228	-0.79583	-4.3484e-17	-2.5033	0.014633	0.021758	-3.53
1.2_394.118	-0.79532	-7.5171e-17	-2.5015	0.014698	0.021841	-3.534
5.88_652.38	0.79199	1.3646e-17	2.4901	0.015138	0.022479	-3.5599
3.09_364.115	-0.79118	3.0069e-18	-2.4874	0.015247	0.022626	-3.5662
1.32_224.036	-0.79099	-9.8532e-17	-2.4867	0.015273	0.022649	-3.5676
5.16_493.28	0.79057	-3.4232e-17	2.4853	0.015328	0.022716	-3.5708
5.21_222.139	-0.79028	-5.5742e-17	-2.4843	0.015367	0.022759	-3.5731
3.94_501.21	0.78998	-7.7889e-17	2.4833	0.015408	0.022804	-3.5754
1.27_345.047	-0.78797	-2.4792e-16	-2.4764	0.015683	0.02319	-3.5909
1.53_447.019	-0.78793	-2.9988e-16	-2.4762	0.01569	0.02319	-3.5913
6.17_400.328	-0.78705	4.2759e-16	-2.4732	0.015811	0.023353	-3.598
3.06_323.1	0.78563	-2.1164e-17	2.4684	0.016009	0.023631	-3.6089
2.91_328.08	-0.78454	2.391e-17	-2.4647	0.016163	0.023836	-3.6173
3.1_504.179	-0.78449	1.7694e-17	-2.4645	0.01617	0.023836	-3.6177
5.21_287.246	-0.78429	2.5616e-17	-2.4638	0.016197	0.02386	-3.6192
5.79_310.212	0.784	3.017e-17	2.4628	0.016239	0.023906	-3.6214
2.67_149.084	-0.78331	-7.6906e-18	-2.4605	0.016336	0.024034	-3.6267
6.36_541.337	-0.78288	2.5905e-16	-2.459	0.016398	0.024108	-3.63
0.6_182.027	-0.78209	-3.666e-17	-2.4563	0.016512	0.02426	-3.636
3.75_404.059	-0.7792	-2.2696e-17	-2.4464	0.016933	0.024862	-3.6581
2.7_358.125	-0.77904	-4.1286e-17	-2.4459	0.016956	0.024879	-3.6592
2.8_426.173	-0.77638	3.8048e-17	-2.4368	0.017353	0.025444	-3.6795
6.38_296.235	0.7745	-1.5613e-16	2.4305	0.017636	0.025843	-3.6937
5.96_351.132	-0.77438	2.0932e-17	-2.43	0.017655	0.025854	-3.6946
3.71_518.199	-0.7731	4.1633e-18	-2.4257	0.017851	0.026123	-3.7042
6.06_649.298	0.77284	-3.3567e-17	2.4248	0.017891	0.026165	-3.7062
5.96_97.968	-0.7726	2.0701e-17	-2.424	0.017928	0.026201	-3.708
5.65_314.245	0.7724	-1.781e-16	2.4233	0.017959	0.026229	-3.7095
3.94_438.21	0.77214	-2.7871e-17	2.4224	0.017999	0.026271	-3.7115
4.98_254.152	-0.77117	-6.193e-17	-2.4191	0.018151	0.026475	-3.7188
6.37_481.315	-0.77025	5.5974e-17	-2.416	0.018294	0.026667	-3.7257
5.83_551.319	0.76966	-2.4136e-16	2.414	0.018387	0.026784	-3.7301
1.08_261.053	0.7684	1.101e-16	2.4097	0.018588	0.027059	-3.7396
1.74_238.051	-0.76824	-4.4409e-17	-2.4092	0.018614	0.027079	-3.7408
6.31_310.181	-0.76815	-9.09e-17	-2.4089	0.018627	0.02708	-3.7414
1.67_326.076	-0.76782	-7.1991e-18	-2.4078	0.018679	0.027139	-3.7438
4.98_210.162	-0.7676	-3.7933e-17	-2.407	0.018715	0.027168	-3.7455
3.01_508.177	-0.76755	2.7293e-17	-2.4068	0.018724	0.027168	-3.7459
3.07_173.105	-0.76697	-1.7116e-17	-2.4049	0.018816	0.027284	-3.7502
0.56_370.111	-0.76497	-7.4709e-17	-2.3981	0.019141	0.027737	-3.7651
5.96_402.129	-0.76379	9.4832e-18	-2.3941	0.019335	0.028	-3.7739
4.12_556.22	-0.76306	7.5287e-17	-2.3916	0.019456	0.028157	-3.7794
Coumaric acid glucoside 2	-0.76281	4.0246e-17	-2.3908	0.019496	0.028196	-3.7811
3.56_374.147	-0.7624	1.8411e-16	-2.3894	0.019564	0.028277	-3.7842
0.65_150.052	-0.76198	3.0069e-18	-2.388	0.019635	0.02836	-3.7873
3.75_239.954	-0.76016	1.7879e-16	-2.3818	0.019942	0.028785	-3.8008
Procyanidin dimer 2	-0.75891	6.2219e-17	-2.3776	0.020154	0.029072	-3.81
6.08_298.16	-0.75708	9.9053e-17	-2.3714	0.020468	0.029506	-3.8235
3.44_604.137	-0.75576	-2.2551e-16	-2.3669	0.020699	0.029819	-3.8332
1.52_659.225	-0.75493	-4.0376e-17	-2.3641	0.020843	0.030004	-3.8393
4.71_282.15	0.75487	9.8301e-18	2.3639	0.020854	0.030004	-3.8397
6.05_785.489	-0.75454	-1.2895e-16	-2.3628	0.020912	0.030068	-3.8422
3.23_620.205	-0.75435	1.1102e-17	-2.3621	0.020947	0.030098	-3.8436
3.75_195.965	-0.75367	-1.463e-17	-2.3598	0.021066	0.03025	-3.8485
5.96_266.156	-0.75298	-1.6191e-17	-2.3575	0.021188	0.030406	-3.8536
6.15_1084.669	0.75038	-3.8395e-17	2.3487	0.021657	0.031058	-3.8726
2.05_294.131	-0.74751	2.3404e-17	-2.339	0.022184	0.031794	-3.8934
3.07_472.156	-0.74687	9.1073e-19	-2.3369	0.022302	0.031942	-3.898
2.2_155.022	-0.74627	9.7145e-18	-2.3349	0.022413	0.032081	-3.9023
3.29_610.186	-0.74594	-3.289e-16	-2.3337	0.022476	0.03215	-3.9048
4.37_642.154	-0.74575	-1.3589e-17	-2.3331	0.022511	0.032179	-3.9061
6.29_166.047	-0.74496	-7.7253e-17	-2.3304	0.02266	0.032372	-3.9118
5.18_388.293	-0.74487	1.615e-16	-2.3301	0.022677	0.032375	-3.9125
2.83_328.08	-0.74461	1.0125e-16	-2.3293	0.022727	0.032425	-3.9144
Phenol fr 2	-0.74413	5.4103e-16	-2.3277	0.022817	0.032533	-3.9178
1.74_304.079	-0.74398	-2.1048e-17	-2.3271	0.022846	0.032547	-3.9189
4.06_514.209	-0.74393	7.4015e-18	-2.327	0.022856	0.032547	-3.9193
5.11_244.167	-0.74378	2.0123e-17	-2.3265	0.022884	0.032566	-3.9204
1.22_102.032	-0.74305	5.0191e-17	-2.324	0.023024	0.032744	-3.9256
3.7_404.113	-0.7427	-6.9389e-19	-2.3228	0.02309	0.032816	-3.9281
2.12_430.16	0.74218	-8.3671e-17	2.3211	0.02319	0.032932	-3.9319
Glutathione (GSH)	-0.74213	-8.3035e-17	-2.3209	0.023201	0.032932	-3.9322
5.36_396.25	-0.742	-8.7893e-17	-2.3205	0.023224	0.032945	-3.9331
1.54_406.102	-0.74153	1.4734e-16	-2.3189	0.023315	0.033049	-3.9365
2.38_475.15	-0.74147	2.3685e-16	-2.3187	0.023328	0.033049	-3.937
2.82_466.167	-0.74136	1.4849e-16	-2.3183	0.023349	0.033057	-3.9378
2.01_316.079	-0.74091	-1.0316e-16	-2.3168	0.023435	0.033158	-3.9409
5.88_278.151	-0.74065	-1.3415e-17	-2.3159	0.023487	0.03321	-3.9429
3.42_308.09	-0.74024	1.6121e-16	-2.3145	0.023567	0.033303	-3.9458
2.84_424.185	-0.73863	3.2728e-17	-2.3091	0.023883	0.033728	-3.9573
3.12_652.196	-0.73818	-4.1865e-17	-2.3076	0.023972	0.033832	-3.9606
4.32_274.177	-0.73807	8.1792e-17	-2.3073	0.023992	0.033839	-3.9613
6.38_344.219	-0.73498	-9.807e-17	-2.2969	0.024612	0.034691	-3.9833
5.31_196.147	-0.7346	3.4463e-17	-2.2956	0.024688	0.034773	-3.986
1.22_524.104	-0.73454	2.0585e-16	-2.2954	0.024701	0.034773	-3.9865
2.34_456.183	-0.73009	1.3461e-16	-2.2805	0.025618	0.036041	-4.0179
0.95_254.046	-0.72653	-8.2688e-18	-2.2685	0.026374	0.037081	-4.043
2.5_490.168	-0.72583	-8.0722e-17	-2.2662	0.026524	0.037268	-4.0479
Coumaric acid glucoside 5	-0.72452	6.5226e-17	-2.2618	0.026809	0.037644	-4.0571
2.97_492.131	-0.72251	-1.1253e-16	-2.255	0.027249	0.038238	-4.0711
1.22_162.053	-0.72119	-1.9545e-16	-2.2506	0.027541	0.038624	-4.0803
5.9_539.322	-0.71973	-2.21e-16	-2.2457	0.027869	0.039059	-4.0905
3.57_406.184	-0.71831	-4.4178e-17	-2.241	0.028189	0.039459	-4.1003
6.27_654.396	0.71831	-3.0011e-17	2.241	0.02819	0.039459	-4.1003
1.21_282	-0.71803	8.3729e-17	-2.2401	0.028253	0.039522	-4.1022
1.22_118.063	-0.71603	-9.3675e-17	-2.2334	0.02871	0.040137	-4.116
3.2_222.087	-0.71595	-7.1239e-17	-2.2331	0.028729	0.040138	-4.1166
3.42_354.189	-0.7157	-4.8457e-17	-2.2323	0.028788	0.040195	-4.1183
Coumarin 1	-0.7129	1.9429e-17	-2.2229	0.02944	0.041079	-4.1376
1.44_252.121	-0.71201	-1.2906e-16	-2.22	0.029651	0.041335	-4.1437
4.47_570.287	-0.71197	-6.3607e-18	-2.2198	0.029661	0.041335	-4.144
3.55_520.194	-0.71029	-4.3021e-17	-2.2142	0.030062	0.041868	-4.1555
4.28_188.141	0.70937	-2.5443e-18	2.2111	0.030283	0.042149	-4.1618
6.21_334.213	0.70905	-4.3484e-17	2.2101	0.03036	0.04223	-4.1639
3.68_206.094	0.70888	-1.2027e-17	2.2095	0.030401	0.042261	-4.1651
3.74_338.156	0.70847	2.8681e-17	2.2082	0.030499	0.042371	-4.1679
3.76_346.032	-0.70676	1.781e-17	-2.2024	0.030918	0.042926	-4.1796
3.3_242.115	-0.70626	2.4283e-16	-2.2008	0.031041	0.043069	-4.1829
3.46_554.218	-0.70527	9.4832e-18	-2.1975	0.031285	0.043381	-4.1897
2.31_386.085	-0.70474	-4.4525e-17	-2.1957	0.031416	0.043536	-4.1932
6.24_280.169	-0.70324	8.9974e-17	-2.1907	0.031793	0.04403	-4.2034
0.84_405.136	0.70279	2.7987e-17	2.1892	0.031905	0.044158	-4.2064
4.06_482.236	-0.70259	1.5092e-17	-2.1886	0.031954	0.044186	-4.2078
1.49_320.955	-0.70255	-1.5127e-16	-2.1884	0.031965	0.044186	-4.2081
3.75_348.031	-0.70147	9.1593e-17	-2.1849	0.032238	0.044535	-4.2153
3.95_550.212	-0.70092	-1.3733e-17	-2.183	0.032378	0.044701	-4.219
1.22_100.052	-0.70044	1.5867e-16	-2.1814	0.032502	0.044845	-4.2223
1.22_164.058	-0.69644	-5.4817e-17	-2.1681	0.033539	0.046236	-4.2491
3.78_386.157	0.69639	-6.1062e-17	2.168	0.033553	0.046236	-4.2494
5.12_294.219	0.69566	8.7893e-18	2.1655	0.033744	0.046467	-4.2543
3.62_504.184	-0.6956	-2.4055e-17	-2.1653	0.033762	0.046467	-4.2547
5.46_308.198	0.6947	-4.3946e-18	2.1624	0.033998	0.046763	-4.2607
5.04_354.11	-0.69438	3.1832e-16	-2.1613	0.034084	0.046853	-4.2629
5.28_474.225	-0.69356	-1.2953e-17	-2.1585	0.034304	0.047126	-4.2683
1.11_280.046	-0.69136	-7.3552e-17	-2.1513	0.034896	0.047909	-4.2829
2.11_431.027	-0.69111	-1.1334e-17	-2.1504	0.034964	0.047973	-4.2846
Cinnamoyl glucose 1	-0.69094	-7.2974e-17	-2.1499	0.03501	0.048007	-4.2857
2.44_139.063	-0.6904	-5.4332e-16	-2.1481	0.035157	0.048165	-4.2893
3.75_241.952	-0.69036	6.0021e-17	-2.1479	0.035169	0.048165	-4.2896
2.25_352.136	-0.68864	-6.3317e-18	-2.1422	0.035642	0.048759	-4.3009
3.62_540.167	-0.6886	3.215e-17	-2.1421	0.035654	0.048759	-4.3012
6.19_652.38	0.68854	3.747e-17	2.1419	0.035669	0.048759	-4.3016
2.72_472.179	-0.68814	2.1817e-16	-2.1406	0.035782	0.048883	-4.3043
5.92_248.177	-0.68751	-1.7856e-16	-2.1385	0.035956	0.049092	-4.3084
3.68_162.104	0.68599	1.3878e-18	2.1335	0.036382	0.049642	-4.3184
4.63_259.215	-0.68582	-2.3673e-16	-2.1329	0.036428	0.049651	-4.3195
Salicyl aldehyde/Benzoic acid 2	-0.68581	1.5381e-16	-2.1329	0.036433	0.049651	-4.3196
5.48_428.198	0.68562	2.1742e-17	2.1322	0.036485	0.049691	-4.3208
5.48_428.201	0.68552	1.3808e-16	2.1319	0.036513	0.049698	-4.3214
1.22_362.056	-0.68536	2.313e-18	-2.1314	0.036558	0.04973	-4.3225
2.82_425.981	-0.68481	-1.9521e-16	-2.1296	0.036714	0.049912	-4.3261
4.12_572.266	0.68461	-2.2667e-17	2.1289	0.036772	0.04996	-4.3275
