# Supplementary material for: Regulation of pectin remodeling and ectomycorrhiza development by cell wall localized proanthocyanidins in hybrid aspen roots
Source: Research Square preprint supplement (doi:10.21203/rs.3.rs-6966375/v1), 2025-07-04
Supplement: Supplementary file 7 [file a80523947c62cdfa0ca6073c.xlsx]

## Sheet: S6_Log2C_PA_biosynthesis_genes
Supplemental Table S6: Gene expression data for selected target genes related to proanthocyanidins based on Chowdhury et al. 2022b. Refers to Figure S3.
			3dac		7dac		14dac		21dac		28dac
Gene ID	Gene name	baseMean	Log2FC	pvalue	Log2FC	pvalue	Log2FC	pvalue	Log2FC	pvalue	Log2FC	pvalue
Phenylpropanoid biosynthesis, initial reactions
Phenylalanine ammonia-lyase (PAL)
Potri.006G126800	PAL	349.62	0.476691	0.404457	0.909773	0.113269	-0.0248761	0.965392	-1.66398	0.00411866	-1.62146	0.00443823
Potri.008G038200	PAL	391.371	0.651503	0.0292577	-0.309818	0.312644	-0.323734	0.284794	-1.74883	2.28762e-08	-0.614167	0.038685
Potri.010G224100	PAL	47.0466	1.52573	0.00392801	0.946059	0.0891642	-0.216878	0.687438	-0.82087	0.140336	-0.817886	0.113777
Potri.010G224200	PAL	37.0195	1.7917	0.00232806	0.300123	0.638889	0.0558003	0.9257	-1.21503	0.0536186	-0.939391	0.106002
Cinnamate 4-hydroxylase (C4H )
Potri.013G157900	C4H	1000.39	0.476237	0.0209529	0.129704	0.534728	0.0533764	0.795906	-0.303038	0.144185	0.0186316	0.927206
Potri.016G091100	C4H	123.392	0.318136	0.599242	0.800946	0.18702	-0.194547	0.747195	-1.05609	0.082008	-1.39468	0.0190673
Potri.018G146100	C4H	6.18554	-0.132966	0.933694	1.83824	0.252448	-0.556049	0.719737	-1.18821	0.452899	-0.864585	0.563115
Potri.019G130700	C4H	283.503	-0.352626	0.32362	-0.552944	0.127417	-0.712587	0.0454435	-1.65471	6.49841e-06	-0.616534	0.0782398
Flavonoid biosynthesis
4-coumarate--CoA ligase (4CL)
Potri.001G036900	4CL	156.501	0.695201	0.216198	0.310204	0.587149	-0.735089	0.192296	-1.69084	0.00302546	-1.63843	0.0033583
Potri.003G188500	4CL	75.3852	0.799927	0.0344022	0.561311	0.149704	-0.15105	0.691293	-0.703788	0.0729698	-0.692699	0.0572795
Potri.004G082000	4CL	3.6037	-1.92043	0.130914	1.89158	0.0320991	0.378253	0.707159	-1.19962	0.308481	0.155898	0.842814
Potri.006G169700	4CL	11.2239	-0.39312	0.548013	0.30251	0.642502	-2.18624	0.00349122	-0.268884	0.681879	0.0536195	0.926281
Potri.016G034800	4CL	400.844	0.108465	0.737346	0.123488	0.708636	-0.176893	0.586517	0.17616	0.587481	-0.0246968	0.938526
Potri.018G094200	4CL	9.99032	-0.416753	0.609896	-0.865026	0.387084	-0.0464017	0.950517	-0.957291	0.253747	-0.756566	0.286799
Potri.019G049500	4CL	60.3116	-2.33144	0.0271881	0.00260641	0.997981	-0.163001	0.870213	-2.80719	0.00742801	-0.846304	0.392468
Naringenin chalcone synthase (CHS)
Potri.001G051500	CHS	44.0887	-2.71483	0.022719	1.00779	0.378745	-0.87893	0.433328	-2.75332	0.0196294	-0.818431	0.459735
Potri.001G051600	CHS	185.851	-2.77887	0.011476	0.92594	0.390505	-0.547745	0.60894	-2.11369	0.0502566	-0.440202	0.680151
Potri.003G176700	CHS	28.9705	-1.52874	0.12258	0.539074	0.568399	-0.250919	0.783435	-1.69547	0.0765644	-1.17222	0.188622
Potri.003G176800	CHS	79.9227	-1.07395	0.301687	0.529506	0.610304	-0.401842	0.696314	-1.79285	0.0889265	-0.887399	0.385027
Potri.003G176900	CHS	85.9543	-1.54183	0.127694	0.507308	0.614786	-0.202146	0.838884	-1.93177	0.057177	-0.670706	0.496881
Potri.014G145100	CHS	501.814	-2.25107	0.00419835	-0.148671	0.848735	-0.757832	0.329118	-2.48067	0.00153416	-0.53743	0.48791
Chalcone isomerase (CHI)
Potri.002G052200	CHI	2.21701	-1.7416	0.242248	-0.0160757	0.991644	-0.121646	0.921885	-2.88223	0.0431688	-0.487906	0.671983
Potri.006G219600	CHI	13.9725	-1.60093	0.0373977	0.807549	0.0841069	0.247212	0.498381	-0.0736444	0.849891	0.123213	0.704456
Potri.010G213000	CHI	264.354	-1.9794	0.00355253	0.29496	0.659523	-0.817554	0.217848	-2.4697	0.000260729	-0.629023	0.340408
Potri.011G101800	CHI	10.7395	-0.232629	0.714344	-1.25315	0.0756677	0.0614839	0.879075	-0.299115	0.480619	-0.395235	0.256282
Flavanone 3-dioxygenase (F3H)
Potri.001G451300	F3H	83.7261	-1.56383	0.0171981	1.21641	0.0618675	-0.543778	0.398735	-1.29413	0.0526514	-0.413117	0.514194
Potri.005G113700	F3H	47.9979	-1.509	0.0624765	0.397747	0.613071	-0.115963	0.876628	-2.94911	0.000367079	-0.539881	0.461901
Potri.005G113900	F3H	272.689	-2.08716	0.00581046	0.19335	0.79528	-0.328175	0.656309	-2.23798	0.00275195	-0.249878	0.733802
Potri.005G185000	F3H	3.79778	2.3485	0.0687487	1.84848	0.182307	0.317284	0.745266	-1.25862	0.21543	-0.289553	0.74362
Potri.011G047800	F3H	2.87533	-1.15414	0.33469	-1.60023	0.184415	-0.499933	0.531673	-1.81346	0.0734865	-1.14802	0.129103
Potri.011G146600	F3H	37.075	-0.38392	0.550203	1.20198	0.0250178	0.946104	0.0571059	1.42921	0.004284	0.64445	0.187606
Potri.011G150100	F3H	1.78607	-0.706927	0.771994	1.8711	0.44197	-3.2056	0.184963	-3.79208	0.115734	-1.54024	0.504206
Potri.011G150200	F3H	3.43185	0.66194	0.543544	0.77482	0.564813	-0.427653	0.691033	-1.46736	0.230862	-0.351197	0.723065
Potri.011G150300	F3H	1.75573	-0.140275	0.911557	-0.36014	0.787323	-1.19488	0.347032	-2.0555	0.123352	-1.43602	0.151836
Potri.011G151000	F3H	2.87287	-0.563704	0.633078	0.331139	0.743359	-0.0490855	0.948986	-0.885881	0.308967	-0.615845	0.377472
Potri.012G006300	F3H	89.4171	0.832484	0.120469	-0.028247	0.957327	1.1367	0.0249478	0.865398	0.0879201	0.823096	0.100873
Potri.015G002800	F3H	16.7383	0.160586	0.855099	2.83627	5.81304e-05	0.753004	0.256464	1.80836	0.00627141	1.86524	0.00317026
Potri.017G048700	F3H	8.09515	0.683994	0.375496	0.126797	0.85005	0.373709	0.547734	0.589919	0.383435	0.373483	0.545874
Potri.017G048900	F3H	4.68707	-2.02423	0.0834554	0.240352	0.774181	-0.077097	0.911163	1.94792	0.00392222	-0.594417	0.415127
Potri.017G049000	F3H	57.0964	0.386209	0.394375	0.117859	0.784638	-0.330681	0.43403	0.962757	0.0213679	-0.0943198	0.821296
Leucopelargonidin and leucocyanidin biosynthesis
Dihydroflavonol 4-reductase (DFR)
Potri.001G415500	DFR	10.1638	0.529674	0.384785	-1.04815	0.174618	-0.580936	0.33304	-3.23333	0.00125874	0.0747336	0.893456
Potri.002G033600	DFR	90.4358	-2.73311	0.0187277	1.84436	0.096406	-0.432351	0.693608	-2.44238	0.0289939	-0.295393	0.786779
Potri.004G230900	DFR	3.85175	-1.49546	0.22647	0.589364	0.495768	-0.390258	0.66311	-0.760809	0.378366	-0.528086	0.499852
Potri.005G229500	DFR	53.3033	-2.45847	0.00572779	0.146813	0.862759	-0.91634	0.263737	-2.46277	0.00455005	-0.556872	0.489158
Potri.006G178700	DFR	11.3566	0.0742623	0.940646	-1.71147	0.203239	-0.860798	0.385024	-2.52344	0.0232979	-0.311639	0.737212
Potri.009G052000	DFR	51.6776	-0.288008	0.396496	-1.13586	0.00510343	-0.229057	0.386986	-0.64883	0.0200901	-0.110542	0.65516
Potri.018G100500	DFR	23.5495	-1.13311	0.234711	0.656171	0.480796	-0.0833252	0.92324	-1.66361	0.0713476	-0.74452	0.379405
Proanthocyanidins biosynthesis from flavanols
Leucoanthocyanidin reductase (LAR)
Potri.008G116500	LAR	4.03802	-1.96519	0.23497	0.84634	0.633052	-1.69194	0.270429	-4.2753	0.0123396	-1.52808	0.288815
Potri.010G129800	LAR	51.5203	-1.26338	0.159464	0.821891	0.366722	-1.23679	0.150148	-2.16916	0.0132656	-1.15321	0.172098
Potri.015G050200	LAR	1.29348	-2.40086	0.165771	4.12239	0.0302594	-0.99374	0.571735	-1.78397	0.309044	-3.05699	0.0808741
Anthocyanidin synthase (ANS)
Potri.001G113100	ANS	180.307	-2.06737	0.016999	0.0809987	0.924047	-0.428185	0.610593	-2.59543	0.00244736	-0.695836	0.405887
Potri.003G119100	ANS	109.657	-2.62845	0.0423189	1.14056	0.367384	-0.0509595	0.96762	-1.05881	0.401268	-0.489366	0.695827
Potri.006G101100	ANS	9.6722	2.46891	0.0216837	2.26698	0.00604284	1.51591	0.032111	2.80775	3.74495e-05	0.857066	0.197824
Potri.008G069300	ANS	22.7617	1.2902	0.0432233	0.580292	0.293385	1.31896	0.00394894	2.80007	3.13597e-10	1.36978	0.00230502
Potri.011G024100	ANS	27.202	-0.532732	0.225205	0.0132036	0.974781	-0.287385	0.414269	0.463847	0.180268	0.12681	0.695211
Anthocyanidin reductase (ANR)
Potri.001G093300	ANR	22.4786	0.542991	0.396839	0.201223	0.743084	0.647924	0.268592	1.70433	0.00328341	0.876933	0.122177
Potri.004G030700	ANR	313.12	-1.95112	0.0152482	0.567373	0.474762	-0.564794	0.473201	-2.64178	0.000911429	-0.596782	0.447051
MATE transporter
Potri.002G055100	MATE	21.4479	-3.49046	0.0059612	0.181115	0.866015	-0.824191	0.418978	-0.810068	0.434894	-0.281625	0.775471
Potri.005G207600	MATE	15.9418	-2.57255	0.0341992	1.61998	0.124339	-0.579581	0.55158	-1.11187	0.266596	-0.129442	0.890315
Trasncription factor regulators
Potri.002G054100	bHLH131	16.2839	-2.24156	0.0223187	0.476607	0.604646	-0.109159	0.893775	0.0310878	0.970257	-0.0666952	0.932303
Potri.002G173900	MYB115	60.3989	-2.35689	0.0025471	-2.36392	0.00212203	-0.257654	0.704314	-2.17126	0.00220961	-1.42772	0.0311444
Potri.006G221800	MYB134	91.246	-1.06549	0.0408789	-1.29491	0.0168851	-0.972639	0.0570605	-3.19277	5.26138e-09	-1.33654	0.00605668
Potri.010G114000	MYB165	5.95566	-2.40948	0.0598139	-0.42704	0.745279	-0.134787	0.878412	-0.386714	0.672536	-0.846515	0.29906
Potri.004G088100	MYB182	2.13722	-2.02437	0.122204	0.749443	0.584115	2.08471	0.034042	1.23965	0.238728	-0.924257	0.337918
