# Supplementary material for: Regulation of pectin remodeling and ectomycorrhiza development by cell wall localized proanthocyanidins in hybrid aspen roots
Source: Research Square preprint supplement (doi:10.21203/rs.3.rs-6966375/v1), 2025-07-04
Supplement: Supplementary file 8 [file b150477dffb6f1f99c821cae.xlsx]

## Sheet: Table S7
Table S7: Log₂-transformed relative expression values to reference genes from RT-qPCR analysis of proanthocyanidin (PA) biosynthesis–related genes in the roots of MYB115 OE and MYB165 OE lines.
Target transcript	Line_condition	Normalised expression	Cor SEM	Log2 relative expression	Mean Cq	Cq SEM
MYB115	WT_CONT	56.7	1.4982	5.82528	25.24	0.2787
MYB115	WT_CONT	1	0.07224	0	39.86	0
MYB115	WT_CONT	66.2804	0.30328	6.05051	28.19	0.0066
MYB115	WT_CONT	12.3046	1.45731	3.62113	34.2	0.13068
MYB115	WT_CONT	10.6808	1.71683	3.41695	34.75	0.14266
MYB115	WT_ECM	18.8255	1.31555	4.23462	28.24	0.09677
MYB115	WT_ECM	4.44355	1.70139	2.15171	32.13	0.53706
MYB115	WT_ECM	17.8603	4.70218	4.15869	28	0.3789
MYB115	WT_ECM	9.73562	3.79816	3.28327	29.02	0.56042
MYB115	WT_ECM	13.0894	3.47981	3.71033	29.19	0.38255
MYB115	MYB115_L5_CONT	112.228	7.61737	6.81028	26.16	0.0845
MYB115	MYB115_L5_CONT	153.737	6.1593	7.26432	25.27	0.00353
MYB115	MYB115_L5_CONT	670	27.1	9.38802	26.76	0.00635
MYB115	MYB115_L5_CONT	257.817	24.9025	8.0102	34.89	0.58671
MYB115	MYB115_L5_CONT	248.933	64.4781	7.95962	25.54	0.62215
MYB115	MYB115_L5_ECM	522.584	29.2953	9.02952	25.94	0.06735
MYB115	MYB115_L5_ECM	209.387	35.142	7.71002	25.83	0.23423
MYB115	MYB115_L5_ECM	48.9516	1.80943	5.61328	28.29	0.04669
MYB115	MYB115_L5_ECM	9.78615	3.61274	3.29074	34.36	0.52627
MYB115	MYB115_L5_ECM	277.812	40.254	8.11796	24.85	0.19937
MYB115	MYB115_L4_CONT	275	1.62637	8.10329	34.45	0.25617
MYB115	MYB115_L4_CONT	92.4581	21.4892	6.53073	25.39	0.33117
MYB115	MYB115_L4_CONT	189.77	21.7458	7.56811	26.24	0.34853
MYB115	MYB115_L4_CONT	35.7204	10.388	5.15868	31.59	0.41945
MYB115	MYB115_L4_CONT	46.781	3.83972	5.54785	26.26	0.10407
MYB115	MYB115_L4_ECM	249.204	51.0163	7.96118	27.63	0.28837
MYB115	MYB115_L4_ECM	33.0373	3.63485	5.04602	32.37	0.39794
MYB115	MYB115_L4_ECM	25.8066	2.21481	4.68967	33.35	0.54957
MYB115	MYB115_L4_ECM	20.1451	0.8902	4.33236	29.3	0.02003
MYB115	MYB115_L4_ECM	118	1.8902	6.88264	17.93	0.07154
ANS1	WT_CONT	0.73089	0.45864	-0.452274	33.29	0.89871
ANS1	WT_CONT	1	0.22968	0	32.53	0.32306
ANS1	WT_CONT	0.59229	0.01366	-0.755624	25.64	0.02068
ANS1	WT_CONT	1.00359	0.1381	0.00517	30.48	0.1652
ANS1	WT_CONT	0.12741	0.08723	-2.97245	33.81	0.97066
ANS1	WT_ECM	0.51278	0.01579	-0.963588	26.1	0.03426
ANS1	WT_ECM	0.38737	0.04045	-1.36822	28.32	0.07734
ANS1	WT_ECM	0.57158	0.09786	-0.806973	25.64	0.24558
ANS1	WT_ECM	0.39935	0.04058	-1.32427	26.3	0.13702
ANS1	WT_ECM	0.48531	0.02688	-1.04302	26.61	0.07501
ANS1	MYB115_L5_CONT	0.49104	0.03526	-1.02609	26.66	0.09101
ANS1	MYB115_L5_CONT	0.88041	0.04023	-0.183753	25.39	0.03188
ANS1	MYB115_L5_CONT	N/A	N/A	#VALUE!	N/A	N/A
ANS1	MYB115_L5_CONT	0.5331	0.07674	-0.907522	34.32	0.03515
ANS1	MYB115_L5_CONT	0.75239	0.10803	-0.410447	25.84	0.19967
ANS1	MYB115_L5_ECM	0.54236	0.02249	-0.882677	28.52	0.03965
ANS1	MYB115_L5_ECM	1.12444	0.04895	0.169207	26.04	0.01335
ANS1	MYB115_L5_ECM	0.31101	0.01192	-1.68497	28.26	0.04892
ANS1	MYB115_L5_ECM	0.49738	0.07496	-1.00758	31.32	0.20142
ANS1	MYB115_L5_ECM	1.10617	0.15858	0.145573	25.49	0.19704
ANS1	MYB115_L4_CONT	1.10081	0.20273	0.138565	29.95	0.2143
ANS1	MYB115_L4_CONT	0.65629	0.02713	-0.607595	25.19	0.02823
ANS1	MYB115_L4_CONT	0.41901	0.04599	-1.25494	26.66	0.15623
ANS1	MYB115_L4_CONT	0.82712	0.03927	-0.273831	29.69	0.06786
ANS1	MYB115_L4_CONT	0.34139	0.01745	-1.55051	26.03	0.04738
ANS1	MYB115_L4_ECM	0.36606	0.07511	-1.44985	29.71	0.28908
ANS1	MYB115_L4_ECM	1.9286	0.99258	0.947554	27.8	0.74019
ANS1	MYB115_L4_ECM	2.47545	0.41212	1.30769	27.25	0.23853
ANS1	MYB115_L4_ECM	0.68865	0.16206	-0.538157	26.84	0.33407
ANS1	MYB115_L4_ECM	0.57822	0.07508	-0.79031	33.28	0.11987
ANR1	WT_CONT	0.18833	0.1479	-2.40867	34.44	0.09591
ANR1	WT_CONT	1	0.46054	0	34.69	0.66031
ANR1	WT_CONT	0.5206	0.0583	-0.941753	26.03	0.03269
ANR1	WT_CONT	1.10315	0.26161	0.141629	32.05	0.22382
ANR1	WT_CONT	1.26524	0.53654	0.339411	32.66	0.58384
ANR1	WT_ECM	0.17602	0.95397	-2.50619	25.6	0.4212
ANR1	WT_ECM	0.1181	0.41577	-3.08192	29.95	1.06716
ANR1	WT_ECM	0.2607	0.04303	-1.93954	25.84	0.00878
ANR1	WT_ECM	0.22328	0.09579	-2.16307	27.05	0.11907
ANR1	WT_ECM	0.71602	0.05388	-0.481928	27.2	0.04615
ANR1	MYB115_L5_CONT	6.50998	0.05348	2.70265	27.2	0.01275
ANR1	MYB115_L5_CONT	2.4939	0.41226	1.3184	26.05	0.2314
ANR1	MYB115_L5_CONT	4.21558	2.66509	2.07573	35.29	0.74792
ANR1	MYB115_L5_CONT	2.25808	0.4078	1.1751	34.4	0.16121
ANR1	MYB115_L5_CONT	2.64828	0.11714	1.40506	26.19	0.03215
ANR1	MYB115_L5_ECM	1.88741	0.09827	0.916408	28.88	0.06031
ANR1	MYB115_L5_ECM	2.66985	0.13348	1.41676	26.96	0.0379
ANR1	MYB115_L5_ECM	1.07702	0.09312	0.107045	28.62	0.12205
ANR1	MYB115_L5_ECM	0.86687	0.1972	-0.206112	32.68	0.31781
ANR1	MYB115_L5_ECM	1.3129	0.14148	0.392757	27.41	0.1422
ANR1	MYB115_L4_CONT	5.73185	0.29774	2.519	32.07	0.3455
ANR1	MYB115_L4_CONT	1.64127	0.08819	0.714813	26.03	0.05701
ANR1	MYB115_L4_CONT	1.70243	0.01665	0.767595	28.07	0.02252
ANR1	MYB115_L4_CONT	1.85527	0.15322	0.891629	30.69	0.11878
ANR1	MYB115_L4_CONT	4.49333	0.17012	2.16779	26.06	0.15433
ANR1	MYB115_L4_ECM	0.90739	0.04958	-0.140205	30.56	0.04628
ANR1	MYB115_L4_ECM	1.79189	0.07354	0.841482	30.06	0.0086
ANR1	MYB115_L4_ECM	2.21679	0.29966	1.14847	29.57	0.19298
ANR1	MYB115_L4_ECM	1.54668	0.0537	0.629175	29.09	0.10338
ANR1	MYB115_L4_ECM	1.50369	0.46971	0.588507	35.64	1.33764
MYB165	WT_CONT	1	0.09802	0	33.86	0
MYB165	WT_CONT	N/A	N/A	#VALUE!	N/A	N/A
MYB165	WT_CONT	0.91201	0.16552	-0.132878	35.76	0
MYB165	WT_CONT	1.49596	0.07482	0.581072	33.74	0
MYB165	WT_CONT	0.17091	0.02601	-2.54869	35.62	0.20992
MYB165	WT_ECM	N/A	N/A	#VALUE!	N/A	N/A
MYB165	WT_ECM	0.08989	0.0056	-3.4757	32.98	0.05705
MYB165	WT_ECM	0.02775	0.04195	-5.17137	35.38	2.18061
MYB165	WT_ECM	0.05703	0.00754	-4.13214	33.37	0.18181
MYB165	WT_ECM	0.14185	0.1117	-2.81756	34.77	1.13548
MYB165	MYB165_B1_CONT	25.7138	1.46152	4.68447	23.3	0.01088
MYB165	MYB165_B1_CONT	43.9802	2.79729	5.45878	26.18	0.05785
MYB165	MYB165_B1_CONT	33.4509	1.72878	5.06397	29.35	0.06418
MYB165	MYB165_B1_CONT	47.4864	3.61529	5.56944	28.72	0.09357
MYB165	MYB165_B1_CONT	37.2269	3.42195	5.21827	29.94	0.11326
MYB165	MYB165_B1_ECM	39.5072	2.38944	5.30405	27.3	0.07303
MYB165	MYB165_B1_ECM	36.627	10.0111	5.19483	29.21	0.37808
MYB165	MYB165_B1_ECM	27.8318	2.50324	4.79866	24.54	0.12349
MYB165	MYB165_B1_ECM	33.7898	6.25393	5.07852	26.03	0.25141
MYB165	MYB165_B1_ECM	55.508	11.6651	5.79462	24.25	0.30128
MYB165	MYB165_C2_CONT	66.7154	18.3586	6.05995	27.07	0.38209
MYB165	MYB165_C2_CONT	144.754	59.7025	7.17745	23.94	0.5915
MYB165	MYB165_C2_CONT	52.9235	7.4448	5.72584	28.5	0.18444
MYB165	MYB165_C2_CONT	248.938	60.7624	7.95964	28.66	0.30347
MYB165	MYB165_C2_CONT	37.3297	6.95067	5.22225	28.9	0.2368
MYB165	MYB165_C2_ECM	42.1823	11.619	5.39857	23.84	0.39397
MYB165	MYB165_C2_ECM	36.4537	3.95825	5.18799	26.19	0.15314
MYB165	MYB165_C2_ECM	36.914	1.70121	5.2061	25.84	0.05084
MYB165	MYB165_C2_ECM	59.9432	4.15662	5.90553	25.04	0.08487
MYB165	MYB165_C2_ECM	171.144	45.5169	7.41907	24.46	0.37954
ANS1	WT_CONT	1	0.23961	0	30.27	0.3309
ANS1	WT_CONT	0.39334	0.05527	-1.34615	35.74	0
ANS1	WT_CONT	0.71532	0.31975	-0.483339	32.52	0.61774
ANS1	WT_CONT	0.92247	0.57959	-0.116426	30.85	0.90501
ANS1	WT_CONT	1.13194	0.51663	0.178797	29.3	0.65532
ANS1	WT_ECM	0.20533	0.01942	-2.28398	35.36	0
ANS1	WT_ECM	0.61741	0.29035	-0.695699	26.6	0.67489
ANS1	WT_ECM	0.35594	0.03429	-1.49029	28.1	0.13558
ANS1	WT_ECM	0.49534	0.05228	-1.01351	26.66	0.14104
ANS1	WT_ECM	0.24749	0.03817	-2.01456	30.37	0.21959
ANS1	MYB165_B1_CONT	0.61201	0.04046	-0.708373	25.1	0.04989
ANS1	MYB165_B1_CONT	0.76145	0.17177	-0.393179	28.43	0.31756
ANS1	MYB165_B1_CONT	0.54633	0.0971	-0.872155	31.69	0.25358
ANS1	MYB165_B1_CONT	0.06065	0.00342	-4.04335	34.73	0
ANS1	MYB165_B1_CONT	0.18814	0.08901	-2.41012	33.97	0.67904
ANS1	MYB165_B1_ECM	0.09866	0.05237	-3.34139	32.35	0.76433
ANS1	MYB165_B1_ECM	0.0794	0.04429	-3.65472	34.47	0.79696
ANS1	MYB165_B1_ECM	0.17325	0.03588	-2.52907	28.27	0.29612
ANS1	MYB165_B1_ECM	0.20897	0.0385	-2.25863	29.77	0.25015
ANS1	MYB165_B1_ECM	0.11726	0.04361	-3.09222	29.54	0.53554
ANS1	MYB165_C2_CONT	0.48493	0.06622	-1.04415	30.58	0.16491
ANS1	MYB165_C2_CONT	0.49317	0.05886	-1.01984	28.54	0.15955
ANS1	MYB165_C2_CONT	0.1775	0.01821	-2.49411	33.13	0.12143
ANS1	MYB165_C2_CONT	0.29686	0.17077	-1.75215	34.78	0.81049
ANS1	MYB165_C2_CONT	0.3734	0.05026	-1.42121	31.95	0.14703
ANS1	MYB165_C2_ECM	0.3508	0.02425	-1.51128	27.15	0.08508
ANS1	MYB165_C2_ECM	0.095	0.00277	-3.39593	31.18	0.02615
ANS1	MYB165_C2_ECM	0.22927	0.05499	-2.12488	29.58	0.34338
ANS1	MYB165_C2_ECM	0.04987	0.03464	-4.32568	31.68	1.00091
ANS1	MYB165_C2_ECM	0.04035	0.00689	-4.63129	32.92	0.24
ANR1	WT_CONT	1	0.25877	0	30.98	0.35969
ANR1	WT_CONT	0.43583	0.06124	-1.19816	36.3	0
ANR1	WT_CONT	0.34874	0.06735	-1.51978	34.27	0.20821
ANR1	WT_CONT	1.08404	0.37178	0.116418	31.33	0.49215
ANR1	WT_CONT	0.57507	0.13163	-0.798191	30.99	0.32392
ANR1	WT_ECM	0.22603	0.10541	-2.14541	35.93	0.66584
ANR1	WT_ECM	0.36559	0.12278	-1.4517	28.07	0.4795
ANR1	WT_ECM	0.32824	0.00983	-1.60718	28.93	0
ANR1	WT_ECM	0.59054	0.0282	-0.759893	27.11	0.03812
ANR1	WT_ECM	0.2078	0.05618	-2.26673	31.33	0.38836
ANR1	MYB165_B1_CONT	0.72639	0.05106	-0.461184	25.56	0.06066
ANR1	MYB165_B1_CONT	1.11733	0.06623	0.160055	28.59	0.04732
ANR1	MYB165_B1_CONT	0.71189	0.03818	-0.490274	32.02	0.06742
ANR1	MYB165_B1_CONT	0.1854	0.02217	-2.43129	33.83	0.16263
ANR1	MYB165_B1_CONT	0.44262	0.13199	-1.17586	33.45	0.42464
ANR1	MYB165_B1_ECM	0.33498	0.01651	-1.57785	31.3	0.05267
ANR1	MYB165_B1_ECM	0.24816	0.022	-2.01066	33.53	0.06172
ANR1	MYB165_B1_ECM	0.25198	0.0578	-1.98862	28.44	0.32849
ANR1	MYB165_B1_ECM	0.30849	0.08392	-1.6967	29.92	0.38203
ANR1	MYB165_B1_ECM	0.28352	0.05652	-1.81848	28.98	0.28561
ANR1	MYB165_C2_CONT	0.68718	0.2844	-0.54124	30.79	0.58728
ANR1	MYB165_C2_CONT	1.04446	0.61913	0.0627572	28.17	0.85274
ANR1	MYB165_C2_CONT	0.40281	0.24004	-1.31183	32.66	0.85556
ANR1	MYB165_C2_CONT	0.49357	0.28952	-1.01867	34.76	0.82718
ANR1	MYB165_C2_CONT	0.7082	0.19512	-0.497771	31.74	0.3767
ANR1	MYB165_C2_ECM	0.37246	0.03336	-1.42484	27.78	0.11826
ANR1	MYB165_C2_ECM	0.17475	0.01435	-2.51664	31.01	0.11376
ANR1	MYB165_C2_ECM	0.29199	0.01697	-1.77601	29.94	0.07209
ANR1	MYB165_C2_ECM	0.13351	0.00632	-2.90498	30.97	0.04306
ANR1	MYB165_C2_ECM	0.02064	0.02963	-5.59841	34.59	2.07011
