# Supplementary material for: Regulation of pectin remodeling and ectomycorrhiza development by cell wall localized proanthocyanidins in hybrid aspen roots
Source: Research Square preprint supplement (doi:10.21203/rs.3.rs-6966375/v1), 2025-07-04
Supplement: Supplementary file 9 [file b72dd7434c4d6837b52f5715.xlsx]

## Sheet: S3_Mean_z-score
Supplementary Table S3. Mass feautures detected in control roots and ectomycorrizal (ECM) roots of P.tremula × P. tremuloides by UPLC-MS/QTOF(ESI-). Values are normalized to z-score and colored based on their responses. (orange=higher, turquoise=lower), <LOD= below the limit of detection. Refers to Figure 1
Treatment, C=control, ECM=ectomycorrhiza, F=fungi											C	C	C	C	C	ECM	ECM	ECM	ECM	ECM
Time (day)											3	7	14	21	28	3	7	14	21	28
Mass feature	Metabolite group	Formula	Target mass	Measured mass	mDa difference	RT (min)	Hits all N=40	Hits Control N=15	Hits ECM N=15	Hits Fungi N=10
Tyrosine	Aromatic amino acid	C9H11NO3	181.074	181.074	-0.1	1.06	40	15	15	10	-0.506068	-0.406813	-0.610574	-0.831458	-0.834364	0.25981	2.26131	1.0252	0.332522	-0.68956
Tryptophan	Trp/auxin metabolism	C11H12N2O2	204.09	204.09	-0.1	2.12	40	15	15	10	-0.754285	-0.825775	-0.391998	-0.409575	-0.838168	-0.768019	0.0540295	1.73193	1.69623	0.505634
Tremuloidin 3 (FA)	Salicinoid	C21H24O10	436.137	436.136	1	3.97	39	15	15	9	0.196072	0.892989	2.25488	-0.114636	0.409182	-1.03952	-0.526842	-0.536429	-0.575501	-0.960193
Tremuloidin 2	Salicinoid	C20H22O8	390.132	390.131	0.5	3.72	30	15	15	0	0.999852	0.736365	1.99951	0.410218	-0.223412	-0.744252	-0.87795	-0.585442	-1.08546	-0.629419
Tremuloidin 1 (FA)	Salicinoid	C21H24O10	436.137	436.135	2	3.38	29	15	14	0	0.689422	0.940291	1.86764	0.352684	-0.0395273	-0.264216	-0.665732	-0.329177	-1.00146	-1.54992
Tremuloidin 1	Salicinoid	C20H22O8	390.132	390.132	-0.5	3.38	30	15	15	0	0.910766	1.31842	1.3523	0.50033	0.258082	-0.380813	-0.639719	-0.917823	-1.25662	-1.14492
Tremulacin (FA)	Salicinoid	C28H30O13	574.169	574.167	1.6	4.37	40	15	15	10	-0.440792	1.18693	0.370603	-0.836494	0.338006	-1.00703	-0.316045	2.08246	-0.840465	-0.537173
Tremulacin	Salicinoid	C27H28O11	528.163	528.163	0.2	4.37	40	15	15	10	-0.442378	1.21734	0.445615	-0.788798	0.225588	-1.01993	-0.340973	2.07701	-0.822832	-0.55064
trans-Zeatin	Cytokinin	C10H13N5O	219.112	219.111	1	1.8	40	15	15	10	-1.08129	-0.747874	1.4943	1.00632	-0.214084	-1.28043	0.765841	1.08786	-0.65588	-0.374753
Syringin 2	Sinapate derivative	C17H24O9	372.142	372.14	2	3.91	30	15	15	0	-0.31114	0.0447124	1.30544	1.57787	1.25795	-0.960748	-0.489709	-0.834995	-0.764963	-0.824418
Syringin 1	Sinapate derivative	C17H24O9	372.142	372.141	1	3.17	30	15	15	0	-0.284066	0.133611	1.58368	1.72068	-0.687413	-0.0103036	-0.453377	0.274462	-1.34618	-0.931102
Succinic acid	Primary	C4H6O4	118.027	118.027	-0.4	0.92	40	15	15	10	-0.360284	-0.915163	-0.0101965	-1.07361	-0.777376	-0.345979	2.1756	1.17861	0.176754	-0.0483485
Sinapoyl alcohol	Sinapate derivative	C11H14O4	210.089	210.091	-1.8	4.59	40	15	15	10	-0.386827	-0.365163	2.78936	0.149132	-0.115027	-0.469781	-0.318884	-0.387458	-0.330075	-0.565281
Shikimic acid	Phenolic	C7H10O5	174.053	174.053	-0.2	1.61	34	15	15	4	-0.266674	-0.331855	1.5708	0.377597	1.63025	-1.44291	0.123553	-0.424686	-1.12276	-0.113309
Salirepin 2	Phenolic glycoside	C13H18O8	302.1	302.1	0.2	2.32	30	15	15	0	0.184001	0.277142	1.39185	1.4856	0.854033	-0.541528	-0.466848	-0.77691	-1.16299	-1.24434
Salirepin 1 (FA)	Phenolic glycoside	C14H20O10	348.106	348.106	-0.3	1.57	30	15	15	0	-0.10276	0.663639	1.83008	1.2617	0.330735	-1.02082	-0.324012	-0.736667	-0.961448	-0.940446
Salirepin 1	Phenolic glycoside	C13H18O8	302.1	302.101	-0.8	1.58	30	15	15	0	-0.535327	0.758047	1.61251	1.42689	0.425055	-1.19234	-0.260952	-0.414571	-0.858192	-0.961124
Salicylic acid glucoside 3	SA derivative	C13H16O8	300.084	300.084	0.5	2.44	27	13	14	0	-0.642854	-0.992653	-0.219939	-0.924941	0.232986	0.43049	-0.196858	0.118093	-0.315436	2.51111
Salicylic acid glucoside 2	SA derivative	C13H16O8	300.084	300.085	-0.5	1.92	30	15	15	0	-0.448258	-0.0287898	0.911675	2.3119	0.4843	-0.812153	-0.23564	-0.517196	-0.92652	-0.739321
Salicylic acid glucoside 1 (FA)	SA derivative	C14H18O10	346.09	346.09	0	1.62	30	15	15	0	1.38153	0.243786	1.67997	0.570699	-0.354714	-0.350617	-0.137158	-0.412212	-1.38443	-1.23686
Salicylic acid glucoside 1	SA derivative	C13H16O8	300.084	300.085	-0.5	1.61	35	15	15	5	1.52359	0.185107	1.5924	0.544501	-0.205265	-0.364225	-0.187543	-0.501142	-1.33691	-1.25051
Salicylic acid fragment 8	SA derivative	C7H6O3	138.032	138.032	-0.3	5.29	30	15	15	0	0.36884	0.054076	1.91225	1.18106	-0.53373	-0.0198746	-0.0685573	-0.26996	-1.26951	-1.35459
Salicylic acid fragment 7	SA derivative	C7H6O3	138.032	138.032	-0.3	4.7	30	15	15	0	0.842146	0.984981	0.901435	0.499824	0.432237	-0.349856	-0.471658	0.306987	-0.988543	-2.15756
Salicylic acid fragment 6	SA derivative	C7H6O3	138.032	138.032	-0.3	4.61	30	15	15	0	1.13046	-0.986732	0.16883	-0.752011	1.82008	0.257196	-0.751711	0.448677	0.080368	-1.41517
Salicylic acid fragment 5	SA derivative	C7H6O3	138.032	138.032	-0.3	2.6	36	15	15	6	0.726073	0.89065	1.6604	0.407962	0.796604	-0.994983	-1.04414	-0.848359	-0.956704	-0.637508
Salicylic acid fragment 4	SA derivative	C7H6O3	138.032	138.032	-0.3	2.45	40	15	15	10	0.110255	1.21739	0.092273	0.0666744	1.21885	-0.493596	0.800007	-0.86744	-0.0543833	-2.09003
Salicylic acid fragment 3	SA derivative	C7H6O3	138.032	138.032	-0.3	2.28	39	15	15	9	0.0442769	0.424493	1.36076	-0.995353	1.36849	-1.6762	-1.02685	-0.148226	0.380472	0.268144
Salicylic acid fragment 2	SA derivative	C7H6O3	138.032	138.032	-0.3	1.84	29	14	15	0	-0.00353181	0.91468	0.712593	0.0269207	2.16835	-0.741573	-0.910083	-0.78027	-0.648478	-0.738612
Salicylic acid fragment 1	SA derivative	C7H6O3	138.032	138.032	-0.3	1.62	34	15	15	4	1.56701	0.378146	1.53766	0.389411	-0.336863	-0.358828	-0.122126	-0.434584	-1.37198	-1.24784
Salicyl-HCH (Acylsaligenin)	Salicinoid	C14H14O5	262.084	262.084	0.1	1.84	30	15	15	0	0.092568	0.917604	0.787886	0.146565	2.03026	-0.604057	-1.00347	-0.88628	-0.484493	-0.996582
Salicyl aldehyde/Benzoic acid 3	Salicinoid	C7H6O2	122.037	122.037	-0.2	2.86	40	15	15	10	-0.268911	0.289259	-0.479366	-1.12898	0.626957	0.711851	2.16848	-0.535226	-0.195433	-1.18863
Salicyl aldehyde/Benzoic acid 2	Salicinoid	C7H6O2	122.037	122.037	-0.2	2.68	25	14	11	0	0.36111	-0.674481	1.84825	1.46942	-0.698025	-1.01923	0.454039	-0.359124	-0.582976	-0.798992
Salicyl aldehyde/Benzoic acid 1	Salicinoid	C7H6O2	122.037	122.036	0.8	1.93	30	15	15	0	-0.39966	1.00136	1.21058	1.49894	0.612676	-0.890642	-0.103938	-0.757688	-1.00283	-1.16879
Salicyl alcohol	Salicinoid	C7H8O2	124.052	124.052	0.4	2.12	29	15	14	0	0.0912363	-0.326505	1.90321	-0.576947	-0.134902	-1.16163	0.0832823	1.57127	-0.588909	-0.860099
Salicortin (FA)	Salicinoid	C21H26O12	470.142	470.142	0.4	3.38	40	15	15	10	-0.323818	0.644286	1.29676	-0.879475	-0.2478	-0.913727	-0.33193	1.99556	-0.985714	-0.254149
Salicortin	Salicinoid	C20H24O10	424.137	424.137	0	3.38	36	15	15	6	-0.266933	0.704137	1.15929	-0.830372	-0.273619	-0.976741	-0.313612	2.05303	-0.994704	-0.260477
Salicin 2	Salicinoid	C13H18O7	286.105	286.105	0.3	2.41	30	15	15	0	-0.736046	-0.319115	0.142139	0.724704	1.48588	-1.41213	-1.367	0.708456	1.07198	-0.298865
Salicin 1 (FA)	Salicinoid	C14H20O9	332.111	332.111	-0.3	2.12	40	15	15	10	0.154773	-0.149103	2.02869	-0.470328	-0.157865	-1.14817	-0.394156	1.47784	-0.539711	-0.801966
Salicin 1	Salicinoid	C13H18O7	286.105	286.105	0.3	2.14	30	15	15	0	-0.181306	0.192344	2.1261	0.225024	-0.0397084	-1.19072	-0.0851638	0.920067	-0.707452	-1.25919
Quinic acid 2	Quinic acid derivative	C7H12O6	192.063	192.064	-0.6	2.71	30	15	15	0	-0.0591986	0.483674	1.65458	-0.738997	1.83573	-0.615957	-0.67669	-0.62819	-0.415933	-0.83902
Pyrogallol	Phenolic	C6H6O3	126.032	126.031	0.7	1.32	33	15	15	3	-0.558209	1.30846	1.32148	1.56675	-0.668713	-0.995337	-0.645023	-0.878735	-0.379692	-0.0709851
Prodelphinidin trimer 7	PA	C45H38O19	882.201	882.199	1.7	2.71	30	15	15	0	0.996063	1.26098	0.536846	0.990859	0.769095	-0.42196	-0.905562	-1.1235	-0.845259	-1.25756
Prodelphinidin trimer 6	PA	C45H38O19	882.201	882.199	1.7	2.42	30	15	15	0	0.692498	1.21309	1.53472	0.461197	0.589277	-0.697757	-1.11453	-0.913304	-0.803719	-0.961469
Prodelphinidin trimer 5	PA	C45H38O19	882.201	882.199	1.7	2.24	30	15	15	0	0.856812	0.757823	1.72685	0.24973	0.832198	-0.843161	-0.894711	-1.03365	-0.898149	-0.753745
Prodelphinidin trimer 4	PA	C45H38O21	914.191	914.189	1.6	1.81	29	15	14	0	0.170419	1.08261	0.633497	0.13436	2.00068	-0.687882	-0.83125	-1.03054	-0.552378	-0.919523
Prodelphinidin trimer 3	PA	C45H38O20	898.196	898.194	1.6	2.08	30	15	15	0	0.39211	1.30598	0.973742	0.204868	1.47931	-0.57402	-1.01026	-1.05782	-0.74672	-0.967197
Prodelphinidin trimer 2	PA	C45H38O20	898.196	898.193	2.6	1.89	29	15	14	0	-0.00619931	1.0819	1.06638	0.162337	1.77458	-0.637626	-0.726322	-1.16681	-0.66761	-0.880638
Prodelphinidin trimer 1	PA	C45H38O19	882.201	882.199	1.7	1.52	30	15	15	0	1.06114	1.06514	1.65374	0.1876	0.279217	-0.430784	-0.996659	-0.75032	-0.967229	-1.10184
Prodelphinidin dimer 9	PA	C30H26O13	594.137	594.136	1.3	2.83	30	15	15	0	0.561602	1.25034	1.17076	0.204096	1.28066	-0.674841	-1.05028	-0.949915	-0.867914	-0.92451
Prodelphinidin dimer 8	PA	C30H26O13	594.137	594.136	1.3	2.35	14	7	7	0	0.244473	1.75081	0.259868	1.02968	<LOD	-0.877499	<LOD	-0.637684	-0.932994	-0.836657
Prodelphinidin dimer 7	PA	C30H26O14	610.132	610.131	1.3	2.33	30	15	15	0	0.28522	0.976878	0.847654	0.117536	1.91423	-0.71116	-0.954718	-0.982368	-0.5588	-0.934466
Prodelphinidin dimer 6	PA	C30H26O13	594.137	594.136	1.3	2.04	30	15	15	0	0.515694	1.2431	1.01616	0.154512	1.4346	-0.760631	-0.984776	-1.19979	-0.509707	-0.909169
Prodelphinidin dimer 5	PA	C30H26O13	594.137	594.135	2.3	2.04	19	9	10	0	0.452746	0.981382	1.14013	-0.624709	1.38085	-0.565575	-0.569017	-1.75304	0.236983	-0.679745
Prodelphinidin dimer 4	PA	C30H26O13	594.137	594.137	0.3	1.92	30	15	15	0	0.47276	1.36471	1.30737	0.268086	1.00248	-0.531049	-1.00981	-1.02577	-0.74395	-1.10482
Prodelphinidin dimer 3	PA	C30H26O13	594.137	594.136	1.3	1.76	30	15	15	0	0.725065	1.09183	1.58012	0.263625	0.746424	-0.424929	-1.04942	-0.913475	-0.966102	-1.05314
Prodelphinidin dimer 2	PA	C30H26O14	610.132	610.131	1.3	1.62	33	15	15	3	-0.134746	1.45113	0.0594918	0.00437871	1.98107	-0.759578	-0.895598	-0.952742	0.0576287	-0.811035
Prodelphinidin dimer 1 (A-type)	PA	C30H24O13	592.122	592.12	1.7	2.36	29	15	14	0	1.06243	0.481906	2.0719	0.159409	-0.0474382	-0.826488	-0.258548	-0.912184	-1.21077	-0.520213
Prodelphinidin dimer 1	PA	C30H26O14	610.132	610.131	1.3	1.5	35	15	15	5	0.248354	1.13407	0.711279	0.276938	1.80018	-0.347952	-1.07719	-0.958181	-0.767629	-1.01988
Procyanidin trimer 5	PA	C45H38O18	866.206	866.204	1.8	2.97	30	15	15	0	0.810575	0.0402603	2.25961	0.107032	0.372112	-0.932381	-0.772164	-0.753351	-1.01977	-0.111923
Procyanidin trimer 4	PA	C45H38O18	866.206	866.204	1.8	2.65	30	15	15	0	1.12146	0.21759	1.63981	0.000594078	0.65022	-1.32791	-1.06199	-0.585759	-1.08036	0.426337
Procyanidin trimer 3	PA	C45H38O18	866.206	866.205	0.8	2.58	30	15	15	0	1.48041	-0.0558097	2.05024	0.148397	-0.223762	-0.697536	-0.655215	-0.754153	-0.970105	-0.322464
Procyanidin trimer 2	PA	C45H38O18	866.206	866.204	1.8	2.46	30	15	15	0	1.70322	0.23076	1.6265	-0.0441803	-0.106666	-1.02662	-0.836907	-0.634436	-1.094	0.18232
Procyanidin trimer 1	PA	C45H38O18	866.206	866.204	1.8	1.68	30	15	15	0	1.61994	0.0443095	1.92085	0.0890428	-0.29269	-0.68266	-0.668519	-0.585603	-1.10389	-0.340776
Procyanidin tetramer 3	PA	C60H50O24	1154.27	1154.27	1.2	2.97	30	15	15	0	1.64819	0.225277	1.55657	-0.0346467	0.659636	-0.940016	-0.662221	-0.936365	-0.86948	-0.646947
Procyanidin tetramer 2	PA	C60H50O24	1154.27	1154.27	2.2	2.6	30	15	15	0	1.19744	0.102777	2.16356	0.373758	-0.261176	-0.80962	-0.653122	-0.929109	-0.691917	-0.492587
Procyanidin tetramer 1	PA	C60H50O24	1154.27	1154.27	2.2	2.25	30	15	15	0	0.806434	0.184267	2.327	0.527284	-0.428471	-0.835621	-0.580657	-0.771684	-0.777907	-0.45065
Procyanidin pentamer 2	PA	C75H62O30	1442.33	1442.33	1.6	2.77	30	15	15	0	0.905973	0.441346	2.15189	0.375964	0.0255408	-0.85594	-0.665667	-1.05247	-0.81887	-0.50776
Procyanidin pentamer 1	PA	C75H62O30	1442.33	1442.33	0.6	2.7	29	15	14	0	1.25324	0.282754	2.04272	0.172854	0.0790079	-0.839851	-0.406653	-1.00795	-0.711122	-0.865
Procyanidin dimer 4	PA	C30H26O12	578.142	578.142	0.4	3.1	30	15	15	0	1.47273	0.264584	1.78745	0.395815	0.105436	-0.839945	-0.706369	-0.9019	-1.04937	-0.528434
Procyanidin dimer 3	PA	C30H26O12	578.142	578.141	1.4	2.91	29	15	14	0	1.29969	0.50892	1.78407	0.367381	-0.154851	-1.12674	-0.979806	-0.758424	-0.951336	0.0110953
Procyanidin dimer 2	PA	C30H26O12	578.142	578.141	1.4	2.81	30	15	15	0	-0.0923714	0.766038	2.29586	-0.649831	0.237227	-1.0291	-1.09176	-0.552712	0.272595	-0.155948
Procyanidin dimer 1 (A-type)	PA	C30H24O12	576.127	576.125	1.8	2.35	30	15	15	0	1.03756	0.143282	2.08628	0.633617	-0.0252338	-0.842816	-0.831196	-0.632632	-1.02544	-0.543413
Procyanidin dimer 1	PA	C30H26O12	578.142	578.142	0.4	2.36	30	15	15	0	1.22095	0.282124	2.07734	0.402338	-0.389492	-0.604456	-0.656929	-0.593998	-1.13433	-0.603556
Pinobanksin/Naringenin	Flavonoid	C15H12O5	272.068	272.068	0.5	3.62	30	15	15	0	0.296116	0.935697	1.62908	0.925275	0.420546	-0.6708	-0.59161	-0.60868	-1.64313	-0.692492
Phenylalanine fragment 3		C9H11NO2	165.079	165.079	0	3.25	40	15	15	10	-0.321812	0.876309	1.63389	0.750103	0.942129	-1.4962	-0.13637	-0.558381	-0.922891	-0.766771
Phenylalanine fragment 2		C9H11NO2	165.079	165.079	0	3.12	40	15	15	10	0.122379	1.75051	-0.092986	-1.24132	1.43531	-0.412423	-0.916491	0.577596	-0.279555	-0.943021
Phenylalanine fragment 1		C9H11NO2	165.079	165.079	0	2.99	40	15	15	10	-0.190485	0.443934	1.83053	1.0511	0.773755	-1.08175	-0.606594	-0.376287	-1.32955	-0.514661
Phenylalanine	Aromatic amino acid	C9H11NO2	165.079	165.079	0	1.59	40	15	15	10	-0.821036	-0.710738	-0.617848	-0.599518	-0.926702	-0.372522	1.34403	1.52202	1.38493	-0.202616
Phenol fragment 7	Phenolic	C6H6O	94.0419	94.042	-0.1	5.29	30	15	15	0	0.254213	0.225954	1.9905	1.10935	-0.244335	-0.111907	-0.211948	-0.41683	-1.16768	-1.42731
Phenol fragment 6	Phenolic	C6H6O	94.0419	94.042	-0.1	4.7	30	15	15	0	0.495098	1.3273	0.876204	0.436186	0.381979	-0.415224	-0.34366	0.27955	-0.845086	-2.19235
Phenol fragment 5	Phenolic	C6H6O	94.0419	94.042	-0.1	4.61	30	15	15	0	1.10548	-0.991396	0.273086	-0.265282	1.96269	0.414753	-0.512745	-0.0478065	-0.478828	-1.45995
Phenol fragment 4	Phenolic	C6H6O	94.0419	94.042	-0.1	3.38	10	6	4	0	-0.900362	0.120076	0.656157	<LOD	-0.669043	<LOD	-0.824523	1.61769	<LOD	<LOD
Phenol fragment 3	Phenolic	C6H6O	94.0419	94.042	-0.1	2.82	29	11	15	3	-1.47585	0.29027	0.606789	1.55743	0.346945	-1.43524	-0.291452	0.207433	0.995948	-0.802275
Phenol fragment 2	Phenolic	C6H6O	94.0419	94.042	-0.1	2.45	40	15	15	10	-0.0908755	1.23869	0.146751	0.138173	1.30562	-0.458311	0.804322	-0.918359	-0.170334	-1.99568
Phenol fragment 1	Phenolic	C6H6O	94.0419	94.042	-0.1	2.12	29	15	14	0	-0.0353967	-0.17785	2.02351	-0.567844	-0.131325	-1.18322	0.0448171	1.44743	-0.593126	-0.827007
OH-Tremuloidin-like 2	Salicinoid	C20H22O9	406.126	406.127	-0.6	3.8	30	15	15	0	0.0602808	-0.511589	1.72888	-0.254848	1.0453	-1.05602	-0.245257	-0.459334	-1.40958	1.10217
OH-Tremuloidin-like 1 (FA)	Salicinoid	C21H24O11	452.132	452.132	-0.1	2.02	28	13	15	0	-0.111787	0.615795	1.68374	1.55881	0.218191	-1.00896	-0.645919	-0.893719	-0.536128	-0.880024
OH-Tremuloidin 1 (FA)	Salicinoid	C21H24O11	452.132	452.13	1.9	3.71	27	14	13	0	-0.376623	-0.175894	0.295532	-0.982384	1.73387	-1.10042	-0.0160824	1.71335	-0.660093	-0.431264
OH-Tremuloidin 1	Salicinoid	C20H22O9	406.126	406.126	0.4	3.71	30	15	15	0	-0.586821	-0.23567	0.4385	-1.11242	1.6686	-1.29602	-0.325991	1.56999	-0.313127	0.192958
N6-isopentenyladenosine	Cytokinin	C15H21N5O4	335.159	335.161	-1.3	6.45	19	6	12	2	0.344383	<LOD	2.13381	-0.494005	<LOD	-0.59042	<LOD	-0.681258	-0.262293	-0.450219
Mevalonic acid 2	MVA	C6H12O4	148.074	148.073	0.6	1.52	40	15	15	10	-1.10969	-0.442032	1.08756	0.383835	1.78008	-0.957875	-0.816685	-0.0181306	-0.815287	0.908233
Mevalonic acid 1	MVA	C6H12O4	148.074	148.073	0.6	1.41	40	15	15	10	1.15718	-0.228989	1.39402	0.864687	0.163941	0.644797	-0.722828	-1.40047	-1.28131	-0.591025
Malate	Primary	C4H6O5	134.022	134.022	-0.5	0.77	24	12	5	7	1.85935	-0.00130645	0.0409985	-1.27313	0.313871	-0.0338957	-0.905882	<LOD	<LOD	<LOD
Isopropylmalate-like 4		C7H12O5	176.069	176.069	-0.5	2.18	32	15	14	3	-0.580728	0.135316	1.28056	1.79035	0.876067	-0.577381	-0.233797	-0.597234	-0.827029	-1.26612
Isopropylmalate-like 3		C7H12O5	176.069	176.068	0.5	2	36	15	15	6	-0.776099	0.10752	1.18863	1.90951	0.95922	-0.891148	-0.452242	-0.592479	-0.696627	-0.756281
Isopropylmalate-like 2		C7H12O5	176.069	176.068	0.5	2.5	33	15	14	4	-0.480536	-0.594391	-0.267918	-0.320835	-0.0544912	-0.33535	-0.525002	-0.30027	0.0947546	2.78404
Isopropylmalate-like 1		C7H12O5	176.069	176.068	0.5	1.75	36	15	15	6	0.0619923	0.748956	1.74326	1.36234	-0.0719698	-0.728905	-0.241757	-0.611857	-1.05178	-1.21028
Indole-3-acetonitrile	Trp/auxin metabolism	C10H8N2	156.069	156.069	-0.2	2.12	21	3	12	7	<LOD	<LOD	-0.849391	<LOD	<LOD	<LOD	-0.84452	1.42391	0.635681	-0.365677
Indole-3-acetic acid	Trp/auxin metabolism	C10H9NO2	175.063	175.063	0.1	3.33	13	0	9	4	<LOD	<LOD	<LOD	<LOD	<LOD	<LOD	<LOD	-0.11154	1.05109	-0.939554
Hypoxanthine-like		C5H4N4O	136.038	136.038	0.5	2.81	30	15	15	0	1.61405	0.921123	1.0645	-0.456507	0.290522	0.270681	-0.342529	-0.825115	-1.14285	-1.39388
Hydroxytryptophan	Trp/auxin metabolism	C11H12N2O3	220.085	220.084	0.8	1.3	22	0	13	9	<LOD	<LOD	<LOD	<LOD	<LOD	-1.18376	0.0983985	1.47865	0.206651	-0.599936
Hydroxycinnamic acid/Coniferoyl aldehyde 2	Coniferyl alcohol derivative	C10H10O3	178.063	178.062	1	3.6	30	15	15	0	0.913676	0.826468	0.873105	-0.232886	1.16736	0.0218241	-0.359152	-0.124529	-1.09763	-1.98824
Hydroxycinnamic acid/Coniferoyl aldehyde 1	Coniferyl alcohol derivative	C10H10O3	178.063	178.063	0	2.7	30	15	15	0	0.61639	0.677496	1.94283	0.75769	0.145375	-0.808793	-0.939966	-0.396208	-0.766137	-1.22867
Homogentisic acid/Hydroxymethoxybenzoic acid glucoside 4	Phenolic glycoside	C14H18O9	330.095	330.095	0.1	3.09	30	15	15	0	0.440403	-0.0717208	1.48783	1.48851	0.769907	-0.899293	-0.923794	-0.515852	-1.25782	-0.51817
Homogentisic acid/Hydroxymethoxybenzoic acid glucoside 3	Phenolic glycoside	C14H18O9	330.095	330.094	1.1	2.86	30	15	15	0	-0.524168	0.71341	1.12577	1.74379	0.874181	-0.795055	-0.598483	-0.798616	-0.852639	-0.888185
Homogentisic acid/Hydroxymethoxybenzoic acid glucoside 2 (FA)	Phenolic glycoside	C15H20O11	376.101	376.099	1.6	1.89	30	15	15	0	0.279968	0.414454	1.99968	0.702484	0.687221	-0.988588	-0.708185	-0.555952	-1.31619	-0.514892
Homogentisic acid/Hydroxymethoxybenzoic acid glucoside 2	Phenolic glycoside	C14H18O9	330.095	330.095	0.1	1.89	30	15	15	0	0.294954	0.516691	1.9075	0.789806	0.658741	-0.988884	-0.626439	-0.595952	-1.37223	-0.584186
Homogentisic acid/Hydroxymethoxybenzoic acid glucoside 1	Phenolic glycoside	C14H18O9	330.095	330.095	0.1	1.47	31	13	14	4	-0.603273	0.573263	1.74142	1.53444	0.289166	-1.14389	-0.604265	-0.35307	-0.644203	-0.789597
Homogentisic acid/Hydroxymethoxybenzoic acid fragment 3	Phenolic	C8H8O4	168.042	168.043	-0.7	2.61	33	11	15	7	0.269986	0.891177	1.23578	-0.281154	1.52706	-1.62771	-0.99528	-0.00762014	-0.360498	-0.651735
Homogentisic acid/Hydroxymethoxybenzoic acid fragment 2	Phenolic	C8H8O4	168.042	168.042	0.3	1.89	30	15	15	0	0.318597	0.484687	1.83317	0.672448	0.914451	-0.957654	-0.755101	-0.592549	-1.36939	-0.548665
Homogentisic acid/Hydroxymethoxybenzoic acid fragment 1	Phenolic	C8H8O4	168.042	168.042	0.3	1.51	24	15	9	0	0.397476	-0.326869	0.487064	-0.413599	2.33076	-0.939679	<LOD	-0.787632	-0.610072	-0.137447
HCH-Salicortin (FA)	Salicinoid	C28H32O15	608.174	608.173	1.1	3.87	30	15	15	0	-0.717497	0.140045	1.72822	-0.740503	0.299512	-0.846211	-0.42357	1.75962	-0.854291	-0.345322
HCH-Salicortin	Salicinoid	C27H30O13	562.169	562.168	0.6	3.87	28	14	14	0	-0.801796	0.0897477	1.70699	-0.560505	0.148962	-0.910001	-0.121928	1.79668	-0.91811	-0.430042
Grandidentatin 1	Salicinoid	C21H28O9	424.173	424.174	-0.7	3.97	34	15	15	4	-0.486361	0.557444	0.464372	-0.689762	0.293563	-0.757662	-0.688094	2.4448	-0.532687	-0.605617
Glutathione (GSSG)	Primary	C20H32N6O12S2	612.152	612.151	1	1.24	40	15	15	10	0.406465	-0.00384296	-0.198858	-0.566037	-0.0933582	1.77708	1.55507	-0.668685	-1.05149	-1.15633
Glutathione (GSH)	Primary	C10H17N3O6S	307.084	307.083	0.8	0.68	34	15	9	10	1.77542	0.126387	0.112179	-0.787025	0.648206	0.881137	-1.46679	<LOD	-0.543581	-0.74593
Galloyl glucose	Phenolic glycoside	C13H16O10	332.074	332.074	0.4	1.59	30	15	15	0	-0.490729	-0.205863	1.8361	-0.605317	0.58193	-1.19475	-0.711338	0.161129	-0.799892	1.42873
Gallic acid	Phenolic	C7H6O5	170.022	170.021	0.5	1.34	30	15	15	0	0.546819	0.600862	2.11489	-0.375052	0.821196	-0.69066	-0.953358	-0.791313	-0.975323	-0.29806
Epigallocatechin 2	PA	C15H14O7	306.074	306.075	-1	2.61	34	15	15	4	0.36432	-0.379682	2.42439	0.442767	-0.154517	-1.42526	0.027797	-0.335261	-0.571139	-0.393414
Epigallocatechin 1	PA	C15H14O7	306.074	306.074	0	2.46	30	15	15	0	0.508436	1.1563	1.21891	0.304297	1.27787	-0.628663	-0.968425	-0.866792	-0.771953	-1.22998
dinor-12-oxo-phytodienoic acid	Jasmonate	C18H28O3	292.204	292.204	-0.2	5.67	34	13	14	7	-0.168129	-0.922447	0.912497	-0.0358842	2.42301	-0.30243	-0.463821	-0.712734	-0.774181	0.0441141
Dihydroxybenzoic acid 4	Phenolic	C7H6O4	154.027	154.026	0.6	3.16	30	15	15	0	0.0959411	0.220198	0.665161	-0.453123	2.49507	-0.724972	-0.935561	-0.511207	-0.574854	-0.276651
Dihydroxybenzoic acid 3	Phenolic	C7H6O4	154.027	154.026	0.6	1.83	40	15	15	10	1.1917	-0.230472	0.686109	-0.170558	1.77847	-0.529966	-1.23931	-1.08238	-0.831958	0.428358
Dihydroxybenzoic acid 2	Phenolic	C7H6O4	154.027	154.027	-0.4	1.67	30	15	15	0	0.741236	0.987978	1.00813	-0.579853	1.7232	-0.660073	-0.8485	-1.00767	-0.523207	-0.841245
Dihydroxybenzoic acid 1	Phenolic	C7H6O4	154.027	154.027	-0.4	1.51	30	15	15	0	0.429754	-0.0677263	0.573914	-0.230961	2.40188	-0.693324	-1.02337	-0.848077	-0.634918	0.0928236
Dihydrophaseic acid		C15H22O5	282.147	282.146	0.7	3.48	35	10	15	10	-0.995956	-1.16348	-0.744353	0.158324	-0.463336	-0.364491	-0.00661446	0.721234	2.17816	0.68051
Deoxystrigol-like 2	Strigolactone	C19H22O5	330.147	330.146	0.9	3.48	30	15	15	0	-0.833722	-0.321089	0.398113	1.38915	0.260743	-0.84639	0.428021	-0.555708	-1.51422	1.5951
Deoxystrigol-like 1	Strigolactone	C19H22O5	330.147	330.146	0.7	3.36	30	15	15	0	-0.26433	0.0678697	0.809805	0.470805	1.75574	-1.22775	-0.475294	-0.881312	-1.2284	0.972871
Deoxyhexopyranose 3		C6H12O5	164.069	164.068	0.5	3.36	30	15	15	0	1.02101	0.923441	1.11669	1.38003	-0.237253	-0.601917	-0.528771	-1.13214	-0.759062	-1.18203
Deoxyhexopyranose 2		C6H12O5	164.069	164.067	1.5	3.29	30	15	15	0	0.361086	1.25214	0.935192	0.933051	0.1665	-0.1329	-0.0129478	-0.807072	-0.56394	-2.13111
Deoxyhexopyranose 1		C6H12O5	164.069	164.069	-0.5	0.53	40	15	15	10	0.64923	0.557427	0.43539	0.499826	-1.60672	0.136115	0.995862	0.272652	0.0980188	-2.03779
Dehydroquercetin 3	Flavonoid	C15H12O7	304.058	304.06	-1.7	1.85	30	15	15	0	0.1448	1.08919	0.76046	0.0104635	1.96963	-0.55825	-1.0886	-0.815338	-0.634226	-0.878135
Dehydroquercetin 2	Flavonoid	C15H12O7	304.058	304.059	-0.7	2.98	29	15	11	3	-0.14664	0.451773	0.82894	0.493218	1.92139	-0.911639	-0.862148	-0.924562	-0.85033	<LOD
Dehydroquercetin 1	Flavonoid	C15H12O7	304.058	304.058	0.3	2.61	30	15	15	0	0.990496	0.3234	1.99827	0.477037	0.297051	-0.949049	-1.10993	-0.565191	-0.936592	-0.525495
Coumaroyl quinic acid	Quinic acid derivative	C16H18O8	338.1	338.101	-0.8	3.05	26	15	11	0	-0.0082687	0.159885	1.60979	-0.761001	1.98541	-0.747314	-0.407545	-0.656623	-0.495749	-0.678585
Coumarin 2	Phenolic	C9H6O2	146.037	146.037	-0.2	3.36	30	15	15	0	1.20787	0.499105	0.660001	1.31369	-0.791268	-0.236311	0.532217	-1.041	-0.446574	-1.69772
Coumarin 1	Phenolic	C9H6O2	146.037	146.037	-0.2	3.29	30	15	15	0	0.225597	0.803519	0.591332	1.10261	-0.7228	-0.0709553	1.35237	-0.782156	-0.68138	-1.81814
Coumaric acid glucoside 5	Phenolic glycoside	C15H18O8	326.1	326.099	1.2	3.04	30	15	15	0	1.2591	0.543747	0.901048	0.52759	-0.659234	-0.455016	-0.353189	0.773611	-0.419105	-2.11855
Coumaric acid glucoside 4	Phenolic glycoside	C15H18O8	326.1	326.099	1.2	2.95	30	15	15	0	1.29172	0.970534	0.819952	1.03957	0.0617443	-1.28061	-0.368996	-0.833148	-0.252007	-1.44876
Coumaric acid glucoside 3 (FA)	Phenolic glycoside	C16H20O10	372.106	372.106	-0.3	2.91	29	15	14	0	-0.909687	-0.145051	1.17025	1.74382	1.26678	-0.938732	-0.671652	-0.490325	-0.650263	-0.375134
Coumaric acid glucoside 3	Phenolic glycoside	C15H18O8	326.1	326.1	0.2	2.91	30	15	15	0	1.50971	0.51986	0.904947	0.855515	0.361895	-1.35244	-0.395382	-0.985776	-0.0744575	-1.34387
Coumaric acid glucoside 2 (FA)	Phenolic glycoside	C16H20O10	372.106	372.106	-0.3	2.71	30	15	15	0	1.35935	-0.111467	1.50593	0.412878	0.654724	-0.832384	-0.940407	-0.42623	-1.58509	-0.0373035
Coumaric acid glucoside 2	Phenolic glycoside	C15H18O8	326.1	326.1	0.2	2.72	30	15	15	0	0.136456	0.0565281	1.71201	-0.183951	0.988115	-1.51089	-1.2353	-0.075198	0.835951	-0.723714
Coumaric acid glucoside 1	Phenolic glycoside	C15H18O8	326.1	326.1	0.2	2.64	30	15	15	0	-0.923258	0.354293	0.31279	1.9298	0.309502	-1.16453	-0.537729	0.273606	0.778809	-1.33328
Coumaric acid 3	Phenolic	C9H8O3	164.047	164.046	1.3	3.41	35	11	14	10	-0.809972	-0.535636	-0.626072	-0.961555	-0.610603	-0.0746034	0.406746	0.0064622	2.33057	0.874663
Coumaric acid 2	Phenolic	C9H8O3	164.047	164.047	0.3	2.96	30	15	15	0	-0.327475	0.89563	-0.103304	-0.181182	-0.425644	2.52701	-0.424324	-0.600623	-0.764942	-0.595149
Coumaric acid 1	Phenolic	C9H8O3	164.047	164.048	-0.7	2.83	30	15	15	0	1.7406	0.777474	0.711051	-0.676387	0.326061	0.599031	-0.123447	-0.809873	-1.1514	-1.39311
Coniferin	Coniferyl alcohol derivative	C16H22O8	342.132	342.13	1.5	3.58	30	15	15	0	0.768417	-0.440082	2.23075	0.901665	-0.227994	-0.585562	-0.531255	-0.406137	-1.10278	-0.607022
Citric acid	Primary	C6H8O7	192.027	192.027	0	0.73	40	15	15	10	1.59802	0.82017	0.664892	-0.315958	0.895722	0.329806	-0.553497	-1.28888	-1.21877	-0.931503
cis-12-oxo-phytodienoic acid	Jasmonate	C18H28O3	292.204	292.203	0.8	5.91	37	15	15	7	1.65263	0.0313468	-0.388334	0.385491	0.0597497	1.03241	0.701008	-0.927833	-0.883057	-1.66341
Cinnamoyl glucose 2	Phenolic glycoside	C15H18O7	310.105	310.105	0.3	3.36	30	15	15	0	0.907042	1.02322	1.02242	1.48713	-0.319444	-0.693604	-0.767238	-1.25845	-0.439356	-0.961716
Cinnamoyl glucose 1	Phenolic glycoside	C15H18O7	310.105	310.106	-0.7	3.29	30	15	15	0	0.84875	0.910722	0.429409	0.978936	-0.81241	0.778789	0.0113163	-0.883012	-0.208838	-2.05366
Cinnamic acid 3	Phenolic	C9H8O2	148.052	148.052	0.4	3.73	30	15	15	0	0.407061	0.778088	1.75853	0.705564	0.443528	-0.823636	-0.388286	-0.217497	-1.23492	-1.42844
Cinnamic acid 2	Phenolic	C9H8O2	148.052	148.052	0.4	2.47	30	15	15	0	-0.233732	0.360377	1.99325	0.978019	0.749793	-0.449361	-0.870118	-0.633467	-0.657242	-1.23752
Cinnamic acid 1	Phenolic	C9H8O2	148.052	148.053	-0.6	1.58	40	15	15	10	-0.445432	-0.141422	0.823394	0.849713	2.01122	-1.1343	-0.945744	-0.781432	-0.626443	0.390448
Catechol/Hydroquinone 4	Phenolic	C6H6O2	110.037	110.036	0.8	2.61	29	15	14	0	1.08077	0.588726	1.7723	0.366606	0.481931	-1.19715	-0.813518	-0.467736	-1.01166	-0.800264
Catechol/Hydroquinone 3	Phenolic	C6H6O2	110.037	110.036	0.8	2.31	30	15	15	0	0.0707828	0.320435	-0.142089	-0.51469	-0.311281	-0.477949	-0.545759	2.71333	-0.519269	-0.593508
Catechol/Hydroquinone 2	Phenolic	C6H6O2	110.037	110.036	0.8	2.07	28	15	13	0	0.238501	-0.0428744	2.04871	-0.423935	0.450873	-1.37899	-0.566668	0.900425	-1.14966	-0.0763797
Catechol/Hydroquinone 1	Phenolic	C6H6O2	110.037	110.037	-0.2	1.86	37	15	15	7	-0.432813	0.360893	1.72574	0.901986	1.28437	-0.96112	-1.03857	-0.791369	-0.700767	-0.348352
Catechin(+)	PA	C15H14O6	290.079	290.079	0	2.6	40	15	15	10	0.950207	0.551446	1.78306	0.470157	0.647149	-0.977783	-1.00776	-0.884596	-0.918241	-0.61364
Catechin(-)	PA	C15H14O6	290.079	290.079	0	2.99	30	15	15	0	1.10356	0.694328	1.79634	0.415838	0.335866	-0.855102	-0.944174	-0.840648	-0.814902	-0.891107
Caffeoylshikimate	Phenolic	C16H16O8	336.084	336.085	-0.5	3.12	30	15	15	0	0.720128	0.504439	1.27298	-0.0211437	1.69804	-0.703158	-0.745642	-0.989689	-1.17295	-0.563012
Caffeoyl salicin	Salicinoid	C22H24O10	448.137	448.139	-2	3.76	40	15	15	10	-0.203099	0.185589	-0.460333	1.59639	1.75238	-0.467597	0.409955	-0.738652	-0.971325	-1.10331
Caffeoyl quinic acid	Quinic acid derivative	C16H18O9	354.095	354.095	0.1	2.71	34	15	15	4	-0.158702	0.543881	1.61373	-0.705492	1.86971	-0.591531	-0.668818	-0.634314	-0.437683	-0.830782
Caffeoyl glucose 3	Phenolic glycoside	C15H18O9	342.095	342.095	0.1	2.94	30	15	15	0	0.30456	0.653847	1.91628	1.21475	-0.101771	-0.739657	-0.596902	-0.788445	-1.10715	-0.755512
Caffeoyl glucose 2	Phenolic glycoside	C15H18O9	342.095	342.095	0.1	2.67	30	15	15	0	0.4854	0.797738	1.79891	0.78263	-0.426723	-0.20596	-0.110278	-0.331106	-1.25503	-1.53558
Caffeoyl glucose 1	Phenolic glycoside	C15H18O9	342.095	342.096	-0.9	2.18	40	15	15	10	-0.268272	0.24912	-0.988448	-0.42626	0.305744	1.34444	1.86681	-0.181149	-1.44073	-0.461249
Benzyl-HCH fragment	Phenolic	C14H14O4	246.089	246.089	0.2	2.6	30	15	15	0	0.848288	0.595641	1.83568	0.498229	0.621033	-0.912898	-0.9756	-0.863193	-0.95608	-0.691099
Benzyl salicylate 2	SA derivative	C14H12O3	228.079	228.079	-0.4	3.72	29	15	14	0	1.08225	0.359838	1.96262	0.558953	0.110564	-0.841341	-0.507225	-0.832575	-1.13698	-0.756102
Benzyl salicylate 1	SA derivative	C14H12O3	228.079	228.079	-0.4	3.38	30	15	15	0	1.27318	0.982667	1.43384	-0.00560948	0.425539	-0.351199	-0.422881	-0.784469	-1.32472	-1.22634
Arbutin/hydroquinone glucoside-like (FA)	Phenolic glycoside	C13H18O9	318.095	318.094	1.1	1.7	30	15	15	0	0.117367	0.370689	1.85747	1.61396	-0.461014	-0.776601	-0.597953	-0.445559	-0.756722	-0.921636
Arbutin/hydroquinone glucoside-like	Phenolic glycoside	C12H16O7	272.09	272.09	-0.4	2.31	30	15	15	0	0.0695562	0.320618	-0.160942	-0.505078	-0.330618	-0.471962	-0.524381	2.71664	-0.513004	-0.600833
Arbutin/hydroquinone glucoside (FA)	Phenolic glycoside	C13H18O9	318.095	318.095	0.1	1.22	30	15	15	0	-0.601941	-0.429898	-0.480925	-0.435412	-0.48255	-0.570718	-0.403737	0.102125	0.691089	2.61197
Arbutin/hydroquinone glucoside	Phenolic glycoside	C12H16O7	272.09	272.089	0.6	1.22	30	15	15	0	-0.606139	-0.445828	-0.546305	-0.451321	-0.483898	-0.49519	-0.37362	0.095201	0.695636	2.61147
Anthranilic acid	Trp/auxin metabolism	C7H7NO2	137.048	137.048	0.1	1.66	33	15	15	3	-0.555778	0.768402	1.57358	1.585	0.294392	-0.968721	-0.379326	-0.520485	-0.728658	-1.0684
Aconitate 2 (cis or trans)	Primary	C6H6O6	174.016	174.017	-0.6	0.73	38	15	15	8	1.79561	0.520142	0.906266	-0.312695	0.859077	0.0526881	-0.668664	-1.0873	-1.23705	-0.828076
Aconitate 1 (cis or trans)	Primary	C6H6O6	174.016	174.016	0.4	0.83	38	15	15	8	0.758699	0.146965	1.08494	-0.459419	2.01773	-0.188565	-0.668858	-0.991216	-0.977517	-0.722763
Acetyl-salicin 2 (2’ or 6’) (FA)	Salicinoid	C16H22O10	374.121	374.121	0.3	2	30	15	15	0	-0.286838	0.352623	1.9313	1.48689	0.198072	-0.861953	-0.554424	-0.609357	-0.728155	-0.928165
Acetyl-salicin (2’ or 6’)	Salicinoid	C15H20O8	328.116	328.116	-0.2	2.47	30	15	15	0	0.813336	0.334367	2.13462	0.0638317	0.371963	-0.162468	-0.519773	-0.687279	-1.15444	-1.19415
6_893.557				893.557		6	23	0	15	8	<LOD	<LOD	<LOD	<LOD	<LOD	-0.0131384	-0.0570475	1.61637	-0.466033	-1.08015
6_668.375				668.375		6	24	0	14	10	<LOD	<LOD	<LOD	<LOD	<LOD	-0.875784	-0.631191	1.27196	0.888576	-0.653563
6.43_381.165				381.165		6.43	19	7	10	2	0.00238544	<LOD	2.43276	-0.240097	-0.231862	-0.435229	<LOD	-0.510885	-0.544623	-0.472451
6.39_530.308				530.308		6.39	30	15	15	0	-0.403223	0.0751815	0.0875699	2.283	0.139124	-0.637277	0.958753	-0.526244	-0.853652	-1.12323
6.38_567.351				567.351		6.38	40	15	15	10	0.600723	-0.85487	-0.881421	-0.228561	0.170165	1.85128	1.44004	-0.470054	-0.859814	-0.76749
6.38_562.334				562.334		6.38	30	15	15	0	0.160349	0.44084	0.153829	0.54654	1.99851	-0.667482	0.631534	-1.28455	-1.05965	-0.919919
6.38_344.219				344.219		6.38	34	13	12	9	-0.635871	-0.153224	2.16569	1.31145	-0.0830066	-1.04901	-0.856355	-0.413976	-0.376541	0.0908396
6.38_300.104				300.104		6.38	38	14	14	10	-0.665312	0.279576	-1.2898	1.71826	1.16741	1.01496	-0.600219	-0.275408	-0.426156	-0.923302
6.38_296.235				296.235		6.38	30	15	12	3	-0.914211	-0.909307	0.71534	-0.476913	-0.353901	-0.883032	0.0546632	0.344769	2.35953	0.0630576
6.37_481.315				481.315		6.37	40	15	15	10	0.633387	-0.390504	-0.693599	0.247871	2.14953	-0.119338	0.868317	-1.06143	-0.980089	-0.654148
6.37_453.285				453.285		6.37	40	15	15	10	0.0682551	-0.983602	-0.895445	-0.542095	1.77957	-0.217287	1.81294	-0.472636	-0.106256	-0.44345
6.37_244.203				244.203		6.37	40	15	15	10	-0.255716	0.0432484	2.6585	-0.148831	0.126236	-0.613599	0.166697	-0.410015	-0.665788	-0.900737
6.37_184.182				184.182		6.37	33	14	15	4	-0.747746	-0.96831	0.146956	-0.174754	-0.878124	1.39056	1.27006	1.34595	-0.266161	-1.11843
6.36_609.32				609.32		6.36	40	15	15	10	0.687889	-0.414096	-0.8951	0.55471	2.07497	0.0489993	0.63508	-1.13208	-0.91471	-0.645669
6.36_541.337				541.337		6.36	40	15	15	10	0.717977	-0.34047	-0.648325	0.287931	2.05634	-0.029627	0.868986	-1.09171	-1.03462	-0.786487
6.36_294.219		C18H30O3	294.219	294.219	0.49	6.36	39	15	14	10	-0.279979	-0.491059	1.37383	0.702025	0.314394	-0.286221	1.69591	-0.661173	-1.14432	-1.22341
6.35_314.246				314.246		6.35	27	15	9	3	0.046993	-0.685189	2.03332	0.0451197	1.19429	-0.386493	-0.613596	<LOD	-0.589213	-1.04523
6.34_664.283				664.283		6.34	40	15	15	10	0.121641	-0.544499	-0.659416	0.873305	0.453113	-0.397614	2.33272	-0.793061	-0.47342	-0.912772
6.34_596.295				596.295		6.34	40	15	15	10	-0.119643	-0.485327	-0.166272	0.219304	0.166772	-0.141697	2.65449	-0.586078	-0.615011	-0.926538
6.32_518.323				518.323		6.32	25	11	14	0	0.368517	-0.380938	2.60782	-0.00291171	-0.457082	-0.165933	-0.096521	-0.0709657	-1.04923	-0.752753
6.32_486.297				486.297		6.32	30	15	15	0	-0.203883	-0.844257	1.73405	1.23033	-1.28165	-0.487117	0.0428892	1.03138	-0.739753	-0.481978
6.32_280.17				280.17		6.32	40	15	15	10	-0.168001	-0.399257	2.67975	0.26483	0.242151	-0.557583	-0.212836	-0.552471	-0.631269	-0.665312
6.31_530.307				530.307		6.31	14	0	4	10	<LOD	<LOD	<LOD	<LOD	<LOD	<LOD	0.707107	-0.707107	<LOD	<LOD
6.31_378.169				378.169		6.31	40	15	15	10	-0.407232	-0.100328	1.7358	0.755493	0.0841622	-0.57727	-0.824929	-1.49192	1.32205	-0.495823
6.31_310.181				310.181		6.31	40	15	15	10	-0.371248	-0.198886	2.71894	0.383772	-0.0502565	-0.510407	-0.331364	-0.485306	-0.51834	-0.636907
6.3_562.335				562.335		6.3	36	15	15	6	-0.0878642	0.355353	1.51937	1.38623	0.904881	-0.941507	-0.197428	-1.01347	-1.03561	-0.889956
6.29_508.338				508.338		6.29	24	0	15	9	<LOD	<LOD	<LOD	<LOD	<LOD	-1.65399	0.638715	0.893101	-0.0990411	0.221211
6.29_432.227				432.227		6.29	40	15	15	10	0.975774	-0.382382	0.422858	0.750301	1.38345	-0.215583	0.776909	-1.23162	-1.19226	-1.28745
6.29_166.047				166.047		6.29	40	15	15	10	-0.394703	0.471863	0.531413	-0.00917337	1.69838	-1.24685	1.29891	-0.738882	-0.375809	-1.23515
6.28_453.284				453.284		6.28	40	15	15	10	0.149114	-0.418879	-0.779697	-0.374784	1.88737	-0.378345	1.78224	-0.68048	-0.542088	-0.644451
6.27_722.383				722.383		6.27	22	0	12	10	<LOD	<LOD	<LOD	<LOD	<LOD	-1.46528	0.0255916	-0.383234	0.763326	1.0596
6.27_654.396				654.396		6.27	25	0	15	10	<LOD	<LOD	<LOD	<LOD	<LOD	-1.5999	-0.0221879	-0.0716843	0.835967	0.857809
6.27_541.336				541.336		6.27	40	15	15	10	0.0977727	-0.742987	-0.689339	0.42608	2.22033	0.156939	0.935717	-0.917195	-0.697047	-0.790264
6.27_504.343				504.343		6.27	16	9	7	0	-0.324867	-1.09047	2.00255	-0.431123	<LOD	-0.294363	-0.0764339	0.942131	-0.727429	<LOD
6.26_322.181				322.181		6.26	40	15	15	10	-0.457038	-0.551873	2.72847	-0.638177	0.312023	-0.605207	-0.093097	-0.237558	-0.254686	-0.202854
6.25_538.349				538.349		6.25	28	13	15	0	-0.848505	-0.939122	-0.234918	0.167938	-0.851966	0.0133437	0.447504	2.52007	-0.139499	-0.134848
6.25_520.339				520.339		6.25	30	15	15	0	0.212766	-0.810113	2.42319	0.0327753	-0.890913	0.113582	0.214763	0.380211	-0.945976	-0.730289
6.25_251.152				251.152		6.25	40	15	15	10	-0.420001	-0.00498653	2.14992	0.346208	1.20422	-0.857516	-0.0655004	-0.681693	-0.709828	-0.960832
6.24_559.23				559.23		6.24	39	15	15	9	-0.270521	-0.658198	-0.0840395	-0.468495	0.191972	-0.15597	2.74958	-0.446246	-0.231045	-0.627035
6.24_543.256				543.256		6.24	40	15	15	10	-0.460116	-0.476957	-0.340898	-0.339684	-0.263139	-0.213576	2.8207	-0.147816	-0.103744	-0.474769
6.24_521.275				521.275		6.24	40	15	15	10	-0.432142	-0.494427	-0.206271	-0.354159	-0.329039	-0.224642	2.82246	-0.199717	-0.108666	-0.473399
6.24_280.169				280.169		6.24	40	15	15	10	-0.483565	0.317978	2.21937	-0.68522	1.22505	-0.330735	-0.864557	-0.594199	-0.745522	-0.0586084
6.23_661.401				661.401		6.23	25	0	15	10	<LOD	<LOD	<LOD	<LOD	<LOD	-1.02676	1.37649	-0.93726	0.293234	0.294295
6.23_574.502				574.502		6.23	40	15	15	10	1.13068	-0.428977	-0.945481	-0.186448	-0.503928	-0.886462	2.12677	0.589188	-0.0616799	-0.83366
6.23_557.511				557.511		6.23	40	15	15	10	1.12239	-0.0582031	-0.543467	-0.55936	-0.301357	-1.15813	2.12262	0.21688	0.207818	-1.04919
6.23_549.479				549.479		6.23	32	9	13	10	1.37	-0.724441	0.42186	-0.0204673	-0.367107	-0.982445	1.94664	-0.00823495	-0.507663	-1.12815
6.23_547.483				547.483		6.23	40	15	15	10	1.08396	-0.371293	-0.784971	-0.256914	-0.490147	-0.977208	2.11533	0.63046	0.0189429	-0.968163
6.23_477.285				477.285		6.23	40	15	15	10	-0.402171	-0.446546	-0.345194	-0.371301	-0.322679	-0.102639	2.80725	-0.376645	0.0518141	-0.491892
6.22_625.499				625.499		6.22	26	7	9	10	1.46958	0.823195	-0.103061	-0.647117	-0.784738	-0.973334	1.74348	-0.503659	-0.0926103	-0.931738
6.22_278.153				278.153		6.22	40	15	15	10	0.629304	-0.786266	0.505733	-0.334384	0.380834	-0.966263	2.20554	-0.256201	-1.26343	-0.114863
6.21_664.281				664.281		6.21	40	15	15	10	0.180458	-0.809421	0.493112	2.19764	-0.32115	-0.8721	0.885334	-0.0197145	-0.657369	-1.07679
6.21_596.296				596.296		6.21	40	15	15	10	-0.34346	-0.641558	0.860207	1.33656	-0.267468	-0.298688	1.84094	-0.397974	-0.878653	-1.2099
6.21_432.227				432.227		6.21	40	15	15	10	0.779981	-0.188434	1.24098	1.42504	0.763476	-0.441881	-0.189141	-0.837905	-1.19642	-1.35569
6.21_334.213				334.213		6.21	16	3	3	10	-0.953502	<LOD	<LOD	<LOD	-0.454164	<LOD	-0.142913	1.68688	-0.136302	<LOD
6.21_298.25				298.25		6.21	39	15	15	9	-1.17093	-0.842089	1.20202	0.129644	0.616567	0.579869	-0.170376	1.28239	0.12039	-1.74749
6.2_668.375				668.375		6.2	23	0	13	10	<LOD	<LOD	<LOD	<LOD	<LOD	-1.03983	-0.508663	1.09201	1.05388	-0.597388
6.19_652.38				652.38		6.19	17	3	10	4	<LOD	-1.14178	-0.748943	-0.877106	-0.485352	-0.605676	0.33765	1.73303	0.73998	1.04819
6.19_650.352				650.352		6.19	24	0	14	10	<LOD	<LOD	<LOD	<LOD	<LOD	-1.2111	-0.680977	0.93342	1.08708	-0.128419
6.18_534.318				534.318		6.18	36	15	15	6	0.135453	-0.804002	2.56341	-0.0287186	-0.782977	-0.165147	0.222555	0.249224	-0.845869	-0.54393
6.18_324.23				324.23		6.18	25	0	15	10	<LOD	<LOD	<LOD	<LOD	<LOD	-0.966131	0.238916	1.52433	0.0305209	-0.827639
6.18_244.203				244.203		6.18	39	15	15	9	-0.36126	0.134323	2.46596	0.0740092	0.42701	-0.780533	0.240843	-0.326184	-0.774608	-1.09956
6.17_506.265				506.265		6.17	30	15	15	0	1.07284	-0.123339	0.284471	0.655771	1.79675	0.0821282	-0.322606	-1.23586	-1.18856	-1.0216
6.17_400.328				400.328		6.17	40	15	15	10	0.250142	0.964686	-0.127411	-0.168165	1.66308	-0.516175	1.15127	-1.0229	-0.823132	-1.37139
6.16_976.55				976.55		6.16	31	6	15	10	-0.298422	<LOD	<LOD	-0.502662	-0.208302	-0.27351	2.45673	-0.429133	-0.225556	-0.519147
6.16_613.259				613.259		6.16	40	15	15	10	-0.786349	-0.646675	-0.960041	-0.148773	0.741758	0.575331	2.34177	-0.370394	-0.0278705	-0.718753
6.16_607.243				607.243		6.16	40	15	15	10	-0.527916	-0.852033	-0.627466	-0.613199	1.05985	0.274519	2.35024	-0.239267	-0.18213	-0.6426
6.16_577.208				577.208		6.16	40	15	15	10	-0.445033	-0.564177	-0.654493	-0.480135	0.000673143	-0.129528	2.76693	-0.103023	-0.0154338	-0.375782
6.16_561.246				561.246		6.16	40	15	15	10	-0.386792	-0.817256	-0.945639	-0.557987	0.485438	0.414862	2.5051	-0.320613	0.0560745	-0.433191
6.16_545.272				545.272		6.16	40	15	15	10	-0.560479	-0.76821	-0.879811	-0.481701	0.194343	0.341748	2.58889	-0.125022	0.135872	-0.445633
6.16_543.256				543.256		6.16	40	15	15	10	-0.545325	-0.880935	-0.970352	-0.272852	0.383383	0.147983	2.51795	0.00986314	0.208583	-0.598302
6.16_477.285				477.285		6.16	40	15	15	10	-0.410721	-0.542269	-0.528133	-0.431165	-0.151257	-0.0287121	2.79045	-0.273221	0.00795535	-0.432923
6.16_280.241				280.241		6.16	40	15	15	10	-0.451869	-0.542744	-0.66984	-0.37427	0.0906328	0.175291	2.73704	-0.313111	-0.135641	-0.515487
6.16_1258.846				1258.85		6.16	14	5	4	5	<LOD	-0.268732	-0.29098	-0.90259	-0.420518	<LOD	1.73738	-0.881884	1.02732	<LOD
6.15_996.616				996.616		6.15	40	15	15	10	-0.345011	-0.484979	-0.479238	-0.381971	-0.224906	0.000621064	2.81411	-0.293785	-0.177602	-0.42724
6.15_679.316				679.316		6.15	40	15	15	10	-0.292223	-0.719662	-0.859246	-0.264975	0.646086	0.49589	2.43917	-0.408523	-0.149987	-0.886525
6.15_505.315				505.315		6.15	40	15	15	10	-0.140693	-0.372922	-0.530236	-0.0768115	0.367946	-0.104893	2.69288	-0.481406	-0.739637	-0.614229
6.15_352.224				352.224		6.15	25	0	15	10	<LOD	<LOD	<LOD	<LOD	<LOD	-0.345393	0.527979	1.44979	-0.52659	-1.10578
6.15_294.218				294.218		6.15	40	15	15	10	-0.450829	-0.686408	-1.00564	-0.719667	-0.604252	1.58623	0.606043	1.60687	0.508588	-0.840929
6.15_1084.669				1084.67		6.15	40	15	15	10	-0.31767	-0.476803	-0.474508	-0.327341	-0.230009	0.0729439	2.80923	-0.326472	-0.272809	-0.456558
6.15_1064.602				1064.6		6.15	37	12	15	10	-0.258309	-0.567609	-0.590254	-0.41014	-0.202006	0.166564	2.77066	-0.281967	-0.121983	-0.504958
6.14_717.282				717.282		6.14	40	15	15	10	-0.225364	-0.870332	-1.10488	0.245798	1.21534	0.986966	1.73454	-0.43401	-0.594865	-0.953186
6.14_713.268				713.268		6.14	40	15	15	10	-0.243841	-0.682435	-1.11011	-0.178709	1.10879	0.733808	2.05203	-0.468403	-0.232058	-0.979067
6.14_701.312				701.312		6.14	40	15	15	10	-0.0700362	-0.650146	-1.19865	-0.0987709	1.43442	1.2865	1.3381	-0.742234	-0.312038	-0.987148
6.14_695.295				695.295		6.14	40	15	15	10	-0.290554	-0.669173	-1.09479	-0.062951	1.24972	0.862316	1.89073	-0.602624	-0.325727	-0.956948
6.14_649.298				649.298		6.14	40	15	15	10	-0.302731	-0.740649	-0.928498	-0.0539109	0.774364	0.521516	2.36547	-0.436345	-0.356461	-0.842757
6.14_633.324				633.324		6.14	40	15	15	10	-0.253552	-0.77024	-0.894839	-0.0636804	0.705025	0.687324	2.33399	-0.586307	-0.347846	-0.809876
6.14_582.326				582.326		6.14	40	15	15	10	-0.280568	-0.69976	-0.751304	-0.147917	0.48066	0.388146	2.54981	-0.470785	-0.242777	-0.825507
6.14_565.338				565.338		6.14	40	15	15	10	-0.364508	-0.619181	-0.661027	-0.305435	0.226293	0.301164	2.68207	-0.378902	-0.231804	-0.648675
6.14_555.307				555.307		6.14	40	15	15	10	-0.310457	-0.752179	-0.904975	-0.357604	0.610671	0.684443	2.39755	-0.429533	-0.171458	-0.766458
6.14_505.316				505.316		6.14	40	15	15	10	-0.367669	-0.605042	-0.668274	-0.295477	0.200844	0.351578	2.67287	-0.397166	-0.220702	-0.670968
6.14_1346.898				1346.9		6.14	11	4	3	4	<LOD	-0.348565	-0.803887	<LOD	-0.896041	<LOD	1.4312	<LOD	0.617298	<LOD
6.14_1040.605				1040.61		6.14	35	10	15	10	-0.550705	<LOD	-0.501357	-0.314289	-0.26649	-0.192513	2.63335	-0.13168	-0.167976	-0.508342
6.13_559.231				559.231		6.13	29	5	14	10	-1.19246	<LOD	0.295007	0.177554	-0.610097	-0.893882	2.08073	0.730673	0.0614255	-0.64895
6.13_521.275				521.275		6.13	40	15	15	10	-0.956787	-1.03141	0.0908094	0.0227859	-0.633084	-0.354414	2.40403	0.710806	0.164365	-0.417095
6.13_439.269				439.269		6.13	40	15	15	10	-0.614727	-0.835475	-1.14809	-0.473698	0.41812	-0.938291	0.836438	0.240621	2.096	0.419099
6.13_434.242				434.242		6.13	34	9	15	10	-1.03752	-1.12065	0.28802	-0.676431	1.12644	-0.696842	1.97365	0.444996	0.191134	-0.4928
6.12_294.219		C18H30O3	294.219	294.219	0.49	6.12	40	15	15	10	-1.04312	-1.06804	-0.734961	-0.491428	-0.238267	0.676585	2.04587	0.415475	0.933413	-0.495526
6.11_560.319				560.319		6.11	30	15	15	0	0.557761	0.424512	0.0311943	0.495537	2.08275	-0.177308	-0.0192747	-1.28705	-1.13744	-0.970682
6.11_550.291				550.291		6.11	33	15	15	3	0.616702	0.301928	-0.258566	0.686969	2.02302	-0.0435659	0.068108	-1.22707	-1.21751	-0.95002
6.11_527.32				527.32		6.11	38	15	15	8	-0.0982552	-0.254167	0.994062	0.862247	1.8891	-0.821327	0.290687	-0.6792	-0.986778	-1.19637
6.11_520.339				520.339		6.11	30	15	15	0	-0.42678	-0.954	0.115794	0.672365	-0.67842	0.560572	-0.116508	2.34402	-0.825766	-0.691278
6.1_724.386				724.386		6.1	30	15	15	0	0.154376	0.381746	-0.0356614	1.93371	0.72136	-0.617898	0.750935	-1.1579	-0.983901	-1.14676
6.1_650.363				650.363		6.1	39	14	15	10	-0.180525	-1.30966	-0.464734	-0.786475	-0.113264	-0.345557	-0.537711	2.10385	1.15983	0.474247
6.1_628.306				628.306		6.1	30	15	15	0	0.579491	0.217601	-0.15737	0.383898	2.17199	-0.0711744	0.167335	-1.29802	-1.10111	-0.892635
6.1_577.309				577.309		6.1	29	15	14	0	0.777194	0.186835	-0.434729	0.545268	2.15454	0.00185882	-0.197249	-1.15575	-1.15653	-0.721436
6.1_521.321				521.321		6.1	25	11	10	4	-1.27916	-0.0496029	-0.454401	-0.293409	0.618793	-0.769834	-0.51942	2.09371	-0.456384	1.10971
6.1_278.223				278.223		6.1	37	15	15	7	-0.25264	-0.464628	-0.750137	0.214624	1.63063	-0.339175	1.80312	0.154313	-0.810599	-1.1855
6.08_976.551				976.551		6.08	32	7	15	10	-0.437477	<LOD	-0.793212	-0.505777	-0.123889	-0.131481	2.5836	-0.182624	0.017867	-0.427006
6.08_613.258				613.258		6.08	40	15	15	10	-0.655955	-0.605459	-1.01581	0.0524952	-0.409395	0.488093	2.57213	-0.302357	0.0926479	-0.21639
6.08_607.243				607.243		6.08	40	15	15	10	-0.607258	-0.74089	-0.91648	-0.272306	0.149382	0.261416	2.63671	-0.328188	-0.113523	-0.068863
6.08_577.21				577.21		6.08	40	15	15	10	-0.61636	-1.03525	-0.522452	-0.569235	-0.173177	-0.107386	2.61479	0.0822205	0.242623	0.0842324
6.08_561.246				561.246		6.08	40	15	15	10	-0.624224	-0.798187	-0.913415	-0.359444	-0.332483	0.0619179	2.60138	0.0364733	0.35508	-0.0271013
6.08_545.272				545.272		6.08	40	15	15	10	-0.690299	-0.818881	-0.89864	-0.282196	-0.144691	0.260593	2.60974	-0.0942428	0.195972	-0.137354
6.08_477.286				477.286		6.08	40	15	15	10	-0.589388	-0.721309	-0.631737	-0.409813	-0.381685	0.106981	2.70042	-0.060017	0.230135	-0.243587
6.08_412.203				412.203		6.08	27	5	15	7	-1.17446	<LOD	-0.827105	-0.351644	<LOD	-0.323598	1.2483	1.55428	0.5397	-0.665477
6.08_380.196				380.196		6.08	31	10	15	6	-0.789831	-0.814959	-0.733307	-0.315718	-0.609138	-0.0552195	0.745881	2.4165	0.460353	-0.304561
6.08_364.222				364.222		6.08	39	15	15	9	-0.814064	-0.789625	-0.750102	-0.482622	-0.746772	-0.0253721	1.07055	2.24039	0.422832	-0.125217
6.08_312.23				312.23		6.08	22	15	0	7	0.730177	-0.965616	-0.690677	-0.439313	1.36543	<LOD	<LOD	<LOD	<LOD	<LOD
6.08_312.222				312.222		6.08	21	15	0	6	0.583808	-1.20261	-0.591259	-0.147033	1.35709	<LOD	<LOD	<LOD	<LOD	<LOD
6.08_298.16				298.16		6.08	40	15	15	10	0.0242496	-0.139256	2.79095	-0.0944884	-0.27697	-0.337517	-0.543791	-0.435873	-0.398808	-0.588495
6.08_296.235		C18H32O3	296.235	296.235	0.14	6.08	40	15	15	10	-0.749137	-0.779338	-0.697762	-0.490942	-0.705493	-0.134733	1.49402	1.99706	0.460406	-0.394089
6.08_294.219		C18H30O3	294.219	294.219	0.49	6.08	40	15	15	10	-0.745142	-0.762975	-0.730209	-0.566899	-0.716699	0.0454608	1.58316	1.91644	0.383982	-0.40712
6.08_280.24				280.24		6.08	40	15	15	10	-0.57648	-0.713346	-0.68019	-0.302288	-0.308182	0.161629	2.70719	-0.0293647	0.115855	-0.374826
6.08_1258.845				1258.85		6.08	14	5	4	5	<LOD	0.0974805	0.0944673	-1.07323	-0.680125	<LOD	1.02074	-0.990445	1.53111	<LOD
6.07_996.616				996.616		6.07	40	15	15	10	-0.444329	-0.670217	-0.58462	-0.369248	-0.510395	0.257899	2.72261	-0.0243746	-0.010001	-0.367327
6.07_815.565				815.565		6.07	37	13	15	9	-0.706487	-0.84534	-0.733194	-0.468505	-0.714504	0.0889643	1.99625	1.49562	0.319466	-0.432262
6.07_277.204				277.204		6.07	40	15	15	10	-0.148458	1.01246	-0.109367	-0.0203881	1.53748	-0.532569	1.31887	-1.02315	-0.550321	-1.48456
6.07_1064.603				1064.6		6.07	37	12	15	10	-0.246207	-0.622948	-0.770121	-0.410512	-0.449964	0.311513	2.70904	-0.160732	-0.00590202	-0.354167
6.06_817.491				817.491		6.06	35	13	13	9	-0.378355	-1.10139	0.0329087	1.18562	-0.827929	-0.555781	0.722849	0.247406	1.82585	-1.15118
6.06_717.283				717.283		6.06	40	15	15	10	-0.318056	-0.682794	-1.22232	0.24793	0.334716	1.11206	2.14531	-0.570631	-0.360078	-0.686127
6.06_713.268				713.268		6.06	40	15	15	10	-0.184457	-0.878758	-1.36497	-0.0490364	0.619374	1.13135	2.0019	-0.414403	-0.191074	-0.669926
6.06_701.312				701.312		6.06	40	15	15	10	-0.40226	-0.777896	-1.3334	0.266068	0.526296	1.00149	2.0924	-0.311572	-0.348746	-0.712386
6.06_695.295				695.295		6.06	40	15	15	10	-0.327936	-0.670842	-1.08408	-0.0483535	0.545463	0.893508	2.28075	-0.537546	-0.27452	-0.776435
6.06_679.315				679.315		6.06	40	15	15	10	-0.335611	-0.628004	-1.09407	-0.0989821	-0.22343	0.631129	2.55331	-0.170285	-0.10661	-0.527445
6.06_649.298				649.298		6.06	40	15	15	10	-0.35778	-0.807445	-0.928611	-0.0860243	-0.0417291	1.01197	2.37997	-0.200013	-0.211822	-0.758518
6.06_633.324				633.324		6.06	40	15	15	10	-0.507666	-0.862988	-1.10846	0.00594592	0.13354	1.09891	2.24108	-0.151127	-0.162431	-0.686807
6.06_582.326				582.326		6.06	40	15	15	10	-0.424228	-0.709277	-0.822869	-0.0207273	-0.271676	0.89658	2.47178	-0.0910907	-0.274615	-0.753879
6.06_565.338				565.338		6.06	40	15	15	10	-0.489853	-0.764257	-0.74707	-0.158945	-0.222587	0.654477	2.58241	-0.105991	-0.095942	-0.652241
6.06_557.304				557.304		6.06	40	15	15	10	-0.477501	-0.749099	-0.876119	-0.0285987	-0.0267223	0.867459	2.47757	-0.182775	-0.420774	-0.583446
6.06_555.308				555.308		6.06	40	15	15	10	-0.461412	-0.857547	-0.916049	-0.112343	-0.043641	0.93261	2.39227	-0.0072583	-0.166694	-0.759934
6.06_506.266				506.266		6.06	30	15	15	0	1.21647	0.170332	0.839798	0.817347	1.04809	0.265578	-0.739317	-1.29102	-1.28073	-1.04654
6.06_505.317				505.317		6.06	40	15	15	10	-0.511348	-0.735138	-0.712671	-0.162299	-0.214164	0.749681	2.56364	-0.0741037	-0.264756	-0.638842
6.06_1346.894				1346.89		6.06	13	5	4	4	<LOD	0.5129	0.301877	-1.07896	-0.754844	<LOD	0.855714	-1.17657	1.33989	<LOD
6.06_1152.655				1152.65		6.06	35	10	15	10	0.289744	-0.836707	-0.661034	-0.284698	-0.513073	0.456235	2.58908	-0.10368	-0.274833	-0.661031
6.06_1084.67				1084.67		6.06	40	15	15	10	-0.382641	-0.708455	-0.642575	-0.24276	-0.447632	0.517779	2.66344	-0.0553747	-0.166322	-0.535462
6.05_785.489				785.489		6.05	28	10	13	5	-0.17999	-0.60097	2.72589	0.366785	-0.477091	-0.491371	-0.113247	-0.530459	-0.479102	-0.22045
6.05_298.16				298.16		6.05	40	15	15	10	0.0692063	-0.339821	2.79222	-0.0569785	-0.286569	-0.340174	-0.591729	-0.40778	-0.334676	-0.5037
6.04_520.34				520.34		6.04	32	14	15	3	-0.127094	-0.92854	2.09396	0.43127	-0.834874	-0.577791	0.451684	1.00133	-1.04947	-0.460481
6.04_222.162				222.162		6.04	40	15	15	10	-0.598321	0.884344	-0.0428472	-0.0278949	2.00571	-0.848597	0.895878	-0.667797	-0.259382	-1.34109
6.03_628.306				628.306		6.03	30	15	15	0	0.529387	0.500882	0.526732	0.802967	1.62278	0.196165	-0.473709	-1.38307	-1.30481	-1.01732
6.03_560.319				560.319		6.03	30	15	15	0	0.470014	0.539668	0.72871	1.22505	1.25658	-0.042971	-0.445475	-1.32863	-1.31215	-1.09079
6.03_278.223				278.223		6.03	37	15	15	7	-0.255754	-0.639663	1.67995	0.235622	0.913466	-0.0917116	1.12415	-0.371753	-1.15985	-1.43446
6.02_805.506				805.506		6.02	23	0	15	8	<LOD	<LOD	<LOD	<LOD	<LOD	0.0337757	0.075234	1.45423	-0.208669	-1.35457
6.02_724.386				724.386		6.02	30	15	15	0	-0.0557075	0.529243	0.315977	2.34034	0.0549841	-0.54552	0.231342	-0.88585	-0.867501	-1.1173
6.01_330.196				330.196		6.01	25	14	11	0	1.53209	0.735237	0.716625	-0.380814	-0.43646	0.462834	0.76137	-0.482219	-1.39747	-1.5112
6.01_288.23				288.23		6.01	33	15	12	6	0.718855	1.22748	1.38103	0.680661	0.333232	-0.609401	-0.549622	-0.5162	-1.30863	-1.3574
6.01_272.235				272.235		6.01	40	15	15	10	-0.320599	0.207662	0.579873	-0.109501	1.57393	-0.641498	0.48443	0.996582	-0.860862	-1.91001
5_646.204				646.204		5	30	15	15	0	0.57777	-0.352734	1.20481	0.814645	1.668	-0.541964	-0.619597	-0.373211	-1.171	-1.20672
5.99_572.486				572.486		5.99	35	10	15	10	1.45038	-0.00424758	-1.38122	-1.28489	0.906949	-0.86211	1.28247	-0.0655646	0.226059	-0.267826
5.99_555.496				555.496		5.99	38	13	15	10	1.68102	-0.0758793	-1.458	-1.26911	-0.163911	-0.840588	0.922353	-0.0324765	0.821024	0.415571
5.99_539.321				539.321		5.99	40	15	15	10	0.614623	0.106075	-0.557611	-0.425678	-0.226722	0.436004	2.44256	-0.860062	-0.798655	-0.730537
5.98_336.229				336.229		5.98	21	0	11	10	<LOD	<LOD	<LOD	<LOD	<LOD	0.121977	1.37157	0.150283	-0.217663	-1.42617
5.97_524.332				524.332		5.97	25	0	15	10	<LOD	<LOD	<LOD	<LOD	<LOD	-0.958057	0.793849	-0.733133	1.31811	-0.420764
5.96_97.968				97.968		5.96	39	15	15	9	-0.2156	-0.345952	2.83433	-0.120117	-0.342137	-0.421688	-0.308792	-0.386863	-0.400479	-0.292706
5.96_700.233				700.233		5.96	38	15	15	8	1.2518	-0.247331	0.256616	2.00232	-0.254536	-1.10501	0.068479	-0.744095	-1.20496	-0.023277
5.96_594.28				594.28		5.96	33	15	15	3	0.996871	0.129954	0.0172717	1.12827	1.05672	-0.232851	0.759078	-1.2373	-1.23453	-1.38349
5.96_570.266				570.266		5.96	26	12	9	5	0.269923	-0.45596	2.70042	0.212999	-0.517348	-0.554907	-0.472989	-0.549412	-0.516711	-0.116017
5.96_554.291				554.291		5.96	40	15	15	10	-0.0563563	-0.42294	2.78222	0.14979	-0.435019	-0.487985	-0.39986	-0.461955	-0.458547	-0.209349
5.96_402.129				402.129		5.96	35	15	15	5	1.36613	-0.269358	0.056132	1.94041	-0.235374	-1.01975	0.10481	-0.909056	-1.15947	0.125524
5.96_396.114				396.114		5.96	36	15	15	6	1.04053	-0.31486	1.08916	1.76991	-0.25574	-1.08094	-0.0710664	-0.963986	-1.15216	-0.0608518
5.96_351.132				351.132		5.96	37	15	15	7	1.35991	-0.270666	-0.136322	2.07904	-0.127907	-0.916118	-0.213507	-0.786024	-1.09788	0.109463
5.96_334.143				334.143		5.96	40	15	15	10	1.21241	-0.172033	-0.0779956	2.08961	-0.179989	-1.06232	0.0793628	-0.834013	-1.12274	0.0677067
5.96_266.156				266.156		5.96	40	15	15	10	0.250491	-0.447172	2.56669	0.604617	-0.493047	-0.723434	-0.193005	-0.638269	-0.731024	-0.195844
5.96_1187.156				1187.16		5.96	38	15	15	8	0.608046	-0.500078	1.90702	1.3939	-0.392421	-0.942943	-0.00159377	-0.833662	-1.00369	-0.234573
5.96_1047.715				1047.71		5.96	12	5	3	4	<LOD	-0.243439	1.99758	-0.653113	-0.57839	<LOD	-0.0989285	<LOD	-0.42371	<LOD
5.92_316.26				316.26		5.92	40	15	15	10	-0.866638	-0.353276	1.47179	0.337084	1.12363	-0.759936	0.961395	0.327195	-0.640323	-1.60092
5.92_248.177				248.177		5.92	39	14	15	10	-1.04579	1.25098	0.160879	1.06879	1.54474	-0.823096	-0.226976	-0.247525	-0.30149	-1.3805
5.9_539.322				539.322		5.9	35	14	12	9	0.380824	-0.132266	0.0305736	0.182558	0.505813	0.101976	2.20369	-0.855909	-1.32383	-1.09344
5.9_502.397				502.397		5.9	39	14	15	10	-0.793793	-0.47724	-0.302441	0.855757	2.4714	-0.890543	0.146158	-0.530375	-0.231781	-0.247141
5.89_296.235		C18H32O3	296.235	296.235	0.14	5.89	40	15	15	10	-0.793591	-0.85044	-0.814722	-0.767864	-0.722412	0.260629	1.72793	1.45969	0.780447	-0.279673
5.89_286.214				286.214		5.89	40	15	15	10	0.669685	-0.476601	-0.227531	0.264976	2.29405	0.233515	0.0153224	-0.499214	-0.979369	-1.29483
5.89_234.162				234.162		5.89	40	15	15	10	-0.155283	1.14353	-1.155	0.255642	1.58076	-0.387472	1.11284	-0.662899	-0.396008	-1.33612
5.88_652.38				652.38		5.88	22	4	12	6	<LOD	-0.862958	<LOD	-0.834939	-0.966487	-0.404045	0.279904	1.83236	1.01091	-0.0547454
5.88_543.256				543.256		5.88	36	15	15	6	0.69801	0.237813	-0.000826634	0.549566	1.72456	-0.118326	0.66235	-1.35265	-1.29112	-1.10937
5.88_475.269				475.269		5.88	40	15	15	10	0.743621	0.00509495	0.378624	0.494765	1.78108	-0.144207	0.463528	-1.31473	-1.31292	-1.09486
5.88_397.259				397.259		5.88	39	14	15	10	-0.222209	0.267414	-0.827825	-1.16886	0.158058	-0.919886	-0.142427	-0.464805	1.98206	1.33848
5.88_278.151				278.151		5.88	40	15	15	10	-0.0466091	0.542271	1.58061	0.014497	1.31052	-0.786198	0.467771	-0.697597	-0.792984	-1.59229
5.87_631.308				631.308		5.87	36	15	15	6	0.818283	0.0365922	-0.485285	0.917741	1.57728	0.30646	0.476831	-1.23298	-1.26262	-1.15231
5.87_563.322				563.322		5.87	40	15	15	10	0.888553	0.0324769	-0.347157	0.757952	1.54159	0.237537	0.634735	-1.26535	-1.26719	-1.21314
5.87_503.3				503.3		5.87	38	15	15	8	0.85638	0.0714935	-0.384931	0.766061	1.58658	0.215779	0.600553	-1.31553	-1.19134	-1.20504
5.85_594.28				594.28		5.85	35	15	15	5	0.76204	0.271394	1.43401	1.45065	0.224673	-0.479916	-0.294958	-0.976277	-1.15105	-1.24057
5.85_508.337				508.337		5.85	25	0	15	10	<LOD	<LOD	<LOD	<LOD	<LOD	0.122268	1.67505	-0.338225	-0.743745	-0.715344
5.83_722.371				722.371		5.83	30	15	15	0	0.558872	0.132053	0.244585	1.09853	1.41393	-0.293488	0.66664	-1.33751	-1.22237	-1.26126
5.83_551.319				551.319		5.83	35	11	15	9	-0.545221	-0.376533	-0.611961	-0.382289	-0.211292	0.740868	2.59117	0.00173798	-0.554105	-0.652374
5.83_294.219		C18H30O3	294.219	294.219	0.49	5.83	34	15	15	4	1.1187	0.285774	0.833376	0.711855	0.440388	-0.0941163	0.614312	-0.588545	-1.5559	-1.76584
5.83_276.208				276.208		5.83	30	15	15	0	0.886393	0.0935455	0.784546	0.746129	0.375822	-0.173481	1.15063	-0.703594	-1.42151	-1.73848
5.82_519.258				519.258		5.82	39	15	15	9	-0.00689629	-0.0823161	1.30453	2.10576	-0.109004	-0.561396	-0.0860761	-0.4058	-0.961543	-1.19726
5.8_543.256				543.256		5.8	36	15	15	6	0.849228	0.235937	0.924099	1.08142	0.84461	0.132895	-0.0262409	-1.43616	-1.37488	-1.23091
5.8_475.269				475.269		5.8	40	15	15	10	0.837325	0.218351	1.28199	0.933606	0.690882	-0.0356968	0.0437229	-1.35418	-1.30264	-1.31336
5.8_323.171				323.171		5.8	40	15	15	10	-0.786804	-0.351769	0.0449848	2.47461	0.0376901	0.300342	-1.32626	0.212047	-0.139661	-0.465182
5.8_240.075				240.075		5.8	40	15	15	10	-0.0412114	0.578441	-0.0595512	0.164802	2.18506	-0.683142	0.685713	-0.97706	-0.572905	-1.28014
5.79_536.332				536.332		5.79	23	8	15	0	-0.259786	-0.85629	-0.159	1.38395	-0.960194	0.0287472	-0.180847	2.15384	-0.540544	-0.609879
5.79_508.338				508.338		5.79	29	4	15	10	<LOD	<LOD	-1.02926	-1.14329	<LOD	-0.0196451	1.75849	0.70786	-0.170276	-0.103877
5.79_310.212				310.212		5.79	40	15	15	10	-1.30505	-1.04723	-1.26183	-0.186975	0.980378	0.0855677	0.199063	1.49275	1.15108	-0.107753
5.78_684.363				684.363		5.78	40	15	15	10	-0.860167	-0.32061	1.63168	1.68222	0.758175	-0.918907	-0.766233	-0.558497	-0.0620181	-0.585644
5.78_631.307				631.307		5.78	36	15	15	6	1.13067	0.386078	0.459996	1.2874	0.601831	0.327472	-0.257833	-1.33844	-1.3405	-1.25668
5.78_563.322				563.322		5.78	40	15	15	10	1.12695	0.378845	0.708234	1.13992	0.576299	0.287549	-0.222778	-1.32384	-1.3566	-1.31457
5.78_503.3				503.3		5.78	38	15	15	8	1.12305	0.397444	0.680323	1.17827	0.534233	0.30467	-0.231876	-1.34009	-1.34666	-1.29936
5.77_310.214				310.214		5.77	40	15	15	10	-0.668181	-0.669278	-0.897348	-0.852968	0.271117	-0.161499	1.31208	1.77422	0.839781	-0.94793
5.76_276.172				276.172		5.76	40	15	15	10	-0.191907	0.510558	1.52225	0.69105	1.19689	-0.870334	0.142402	-0.644048	-0.67584	-1.68102
5.75_315.277				315.277		5.75	25	15	10	0	-0.57043	-1.0451	-0.0348155	-0.00349952	1.87093	-1.0841	0.540433	1.04141	0.440516	-1.15535
5.75_278.188				278.188		5.75	40	15	15	10	-0.845895	-0.198592	1.58355	0.355252	1.2991	-1.03347	-0.357059	0.80683	-0.179805	-1.42991
5.74_722.371				722.371		5.74	30	15	15	0	0.532532	0.354213	0.955735	1.65142	0.551113	-0.226549	-0.11118	-1.21141	-1.22891	-1.26696
5.74_582.188				582.188		5.74	30	15	15	0	1.02827	0.30369	1.54765	1.11862	-0.268737	-0.22813	-0.066851	-0.850565	-1.21036	-1.37359
5.71_416.328				416.328		5.71	40	15	15	10	-0.532958	-0.069096	1.66991	1.80194	0.354784	-0.39629	-0.21897	-0.763044	-0.752659	-1.09362
5.71_348.206				348.206		5.71	29	14	15	0	-0.156894	-0.726788	1.33075	1.34829	-0.712156	-0.84163	0.723572	0.985899	-0.626213	-1.32483
5.67_310.213				310.213		5.67	40	15	15	10	-0.281743	-0.818488	-0.856948	-0.724614	-0.339419	2.14707	1.45454	-0.104978	-0.122715	-0.352704
5.66_830.421				830.421		5.66	40	15	15	10	-1.09412	0.105566	1.33006	1.50806	1.16077	-1.17766	-0.497522	-0.731894	-0.145089	-0.458172
5.66_310.215		C18H30O4	310.214	310.215	-0.59	5.66	40	15	15	10	-0.82513	-0.819365	-0.967534	-0.231215	-0.820575	0.165161	1.93816	1.37515	0.475375	-0.290026
5.65_460.152				460.152		5.65	30	15	15	0	0.437545	0.235413	1.91347	1.27407	-0.33167	-0.243329	-0.303505	-0.595126	-1.14614	-1.24072
5.65_314.245				314.245		5.65	39	15	15	9	-0.912261	-0.449134	-0.379152	-0.718006	-0.119224	0.332285	2.38275	0.699097	0.158967	-0.995318
5.64_272.198				272.198		5.64	40	15	15	10	-0.0738782	-0.427359	2.2562	0.628006	0.874917	-0.42205	-0.286018	-0.839491	-0.59605	-1.11428
5.61_314.244				314.244		5.61	39	15	15	9	-0.686631	-0.592174	0.0421443	-0.520507	-0.101166	0.136128	2.62968	-0.273157	0.268238	-0.902557
5.59_312.23		C18H32O4	312.23	312.23	0.06	5.59	40	15	15	10	-0.733836	-0.847369	-0.712434	-0.594705	-0.705025	-0.0729379	1.66928	1.6744	0.768625	-0.446004
5.59_209.105				209.105		5.59	40	15	15	10	-0.740096	-0.622677	0.982819	1.74358	0.755171	0.174281	0.508795	-0.668112	-0.578937	-1.55482
5.57_308.198				308.198		5.57	24	0	15	9	<LOD	<LOD	<LOD	<LOD	<LOD	-1.08496	-0.412575	1.25971	0.839153	-0.601323
5.56_896.267				896.267		5.56	30	15	15	0	0.628196	0.124975	0.909569	1.8126	-0.237879	-0.35593	0.508809	-0.779914	-1.20685	-1.40358
5.56_776.246				776.246		5.56	30	15	15	0	0.243169	0.535082	1.11468	1.45559	-0.454538	-0.429756	0.875511	-0.704347	-1.02898	-1.60641
5.55_267.109				267.109		5.55	40	15	15	10	-0.478882	0.191578	1.23648	0.0827365	1.8675	-0.814959	0.644472	-0.761358	-0.743102	-1.22447
5.5_474.365				474.365		5.5	33	15	9	9	-0.370284	0.34879	0.270344	1.36306	1.28498	-0.881393	-0.588762	-1.42673	<LOD	<LOD
5.48_428.201				428.201		5.48	37	15	15	7	-0.353741	-1.39374	-0.225657	-0.0203971	-0.762076	-0.169193	2.10772	0.781217	0.798378	-0.762513
5.48_428.198				428.198		5.48	38	15	15	8	0.150434	-1.30468	-0.315626	-0.244084	-1.09272	-0.00795087	1.96608	0.698355	0.95755	-0.807354
5.48_380.216				380.216		5.48	37	14	15	8	-0.790774	-0.974712	-0.357426	0.511035	-0.560429	-0.758586	0.276525	2.18297	1.00812	-0.536715
5.48_312.23				312.23		5.48	40	15	15	10	-0.596192	-1.18729	0.331484	1.39933	-1.16107	-0.741754	1.31684	1.00371	0.297293	-0.662349
5.47_602.327				602.327		5.47	40	15	15	10	-0.452036	0.384502	0.156501	1.04205	2.08317	-0.400447	0.110585	-1.17371	-0.635201	-1.11542
5.46_356.218				356.218		5.46	20	0	14	6	<LOD	<LOD	<LOD	<LOD	<LOD	-1.22296	-0.181429	0.935297	1.09671	-0.627616
5.46_308.198				308.198		5.46	27	3	15	9	-0.928262	<LOD	<LOD	-0.905736	<LOD	-0.736036	0.107151	1.5243	1.17667	-0.238091
5.46_290.187				290.187		5.46	21	0	15	6	<LOD	<LOD	<LOD	<LOD	<LOD	-1.17537	-0.218014	1.18308	0.863173	-0.65287
5.45_195.09				195.09		5.45	40	15	15	10	-0.288849	0.416695	-0.233651	1.06941	2.13123	-0.662108	0.280726	-1.00163	-0.764002	-0.947834
5.44_474.131				474.131		5.44	30	15	15	0	0.25136	0.744271	1.40202	1.32605	0.293327	-0.138617	-0.266377	-1.10321	-1.01108	-1.49774
5.44_264.172				264.172		5.44	40	15	15	10	-0.300034	0.196112	0.655142	1.62388	1.40447	-0.595323	0.200482	-1.05421	-0.896064	-1.23446
5.43_294.184				294.184		5.43	40	15	15	10	-0.832001	0.509227	2.29178	0.859197	-0.155107	-0.570955	-0.427282	-0.211403	-0.279066	-1.18439
5.41_568.173				568.173		5.41	30	15	15	0	0.711963	0.299234	1.74929	0.928578	-0.757807	0.0219535	0.150353	-0.376708	-1.25352	-1.47333
5.41_225.1				225.1		5.41	40	15	15	10	0.12921	0.591046	-0.159369	-0.116786	2.14511	-0.327582	0.785917	-1.14569	-0.67949	-1.22236
5.4_944.287				944.287		5.4	30	15	15	0	0.823596	-0.0660017	1.31419	1.58967	0.305071	-0.30603	-0.43918	-0.688112	-1.23887	-1.29433
5.39_180.115				180.115		5.39	40	15	15	10	0.439748	0.43504	-0.228261	0.479865	2.25203	-0.893228	0.188061	-1.05612	-0.868551	-0.748578
5.38_258.183				258.183		5.38	40	15	15	10	-0.162742	0.126607	1.91699	0.0231816	1.45873	-0.534287	0.0703083	-0.888476	-0.841287	-1.16903
5.38_242.152				242.152		5.38	40	15	15	10	-0.385519	-0.471095	1.86445	0.403212	1.34118	-0.563052	0.488827	-1.01023	-0.498732	-1.16904
5.36_431.98				431.98		5.36	40	15	15	10	0.358693	1.31992	0.151832	-0.136904	1.7381	-0.742483	0.270952	-1.55962	-0.580754	-0.819732
5.36_396.25				396.25		5.36	40	15	15	10	-0.275657	-0.305405	2.81803	-0.205877	-0.00253559	-0.461978	-0.411314	-0.283603	-0.390353	-0.481305
5.35_268.166				268.166		5.35	40	15	15	10	0.453197	-0.167953	2.17156	0.337616	0.730386	-0.75335	0.13493	-0.948583	-0.954159	-1.00365
5.34_914.277				914.277		5.34	30	15	15	0	0.480202	0.00901728	1.54155	1.66874	-0.34774	-0.19583	-0.110181	-0.572889	-1.0766	-1.39627
5.33_310.18				310.18		5.33	39	15	15	9	-0.188134	-0.266883	2.81835	-0.248585	-0.383553	-0.434004	-0.217234	-0.273361	-0.173294	-0.633302
5.31_630.206				630.206		5.31	30	15	15	0	-0.0836013	-0.0204678	1.67869	1.59656	-0.169585	0.0729745	-0.592949	0.054799	-1.16772	-1.3687
5.31_240.136				240.136		5.31	40	15	15	10	-0.140639	0.0633082	1.53162	0.744968	1.1524	-0.883891	0.522861	-0.955615	-0.422162	-1.61285
5.31_196.147				196.147		5.31	40	15	15	10	0.0335507	-0.00697088	1.40209	0.554805	1.54735	-1.01024	0.290481	-0.964192	-0.379932	-1.46694
5.29_712.176				712.176		5.29	30	15	15	0	0.516736	0.0459665	1.87731	1.08981	-0.2284	-0.0535721	-0.09045	-0.428615	-1.2082	-1.5206
5.29_698.084				698.084		5.29	30	15	15	0	0.726649	0.267842	1.7465	0.670905	0.174506	0.286352	-0.199931	-0.871229	-1.22198	-1.57962
5.29_696.08				696.08		5.29	30	15	15	0	0.775058	0.215657	1.79789	0.675456	0.0444553	0.208485	-0.18897	-0.659941	-1.30276	-1.56534
5.29_666.169				666.169		5.29	30	15	15	0	0.59099	0.0531545	1.73782	1.28244	-0.377533	0.0542928	-0.181815	-0.501688	-1.22526	-1.4324
5.29_661.179				661.179		5.29	30	15	15	0	0.551903	-0.027226	1.73844	1.35447	-0.261252	-0.114938	-0.211013	-0.380519	-1.15725	-1.49261
5.29_636.155				636.155		5.29	30	15	15	0	0.541171	-0.107351	1.61959	1.51584	-0.271123	-0.195818	-0.142013	-0.318114	-1.16146	-1.48073
5.29_634.16				634.16		5.29	30	15	15	0	0.410847	0.00982844	1.70476	1.43621	-0.281906	-0.118987	-0.132321	-0.353298	-1.18257	-1.49257
5.29_620.164				620.164		5.29	30	15	15	0	0.617303	0.113684	1.71424	1.28071	-0.238137	-0.0659819	-0.283564	-0.441873	-1.18204	-1.51434
5.29_598.184				598.184		5.29	39	15	15	9	0.504306	0.0586154	1.88751	1.12017	-0.344254	-0.000244253	-0.113408	-0.452916	-1.17019	-1.48959
5.29_520.209				520.209		5.29	30	15	15	0	0.43068	0.203065	1.70303	1.24006	-0.150713	-0.119167	0.0357035	-0.540954	-1.20134	-1.60036
5.29_478.162				478.162		5.29	30	15	15	0	0.481026	0.12357	1.83659	1.13932	-0.255752	-0.0696325	-0.0755995	-0.440018	-1.19622	-1.54328
5.29_460.153				460.153		5.29	30	15	15	0	0.542983	-0.0199068	1.97104	1.06086	-0.343818	-0.0542877	-0.125054	-0.493429	-1.05428	-1.4841
5.29_238.123				238.123		5.29	40	15	15	10	-0.162023	-0.235196	2.79763	-0.0354546	-0.149954	-0.511142	-0.180261	-0.512408	-0.518949	-0.492246
5.28_493.278				493.278		5.28	40	15	15	10	0.869064	-1.61668	0.224789	1.10793	-0.144581	-0.69942	1.52149	-0.0133369	-0.0132622	-1.23598
5.28_474.225				474.225		5.28	34	10	14	10	-0.599133	-0.337569	2.49167	1.05332	-0.243957	-0.517799	-0.469993	-0.372866	-0.407073	-0.596596
5.28_294.183				294.183		5.28	40	15	15	10	-0.536623	-0.419742	2.71904	0.429522	-0.265733	-0.372474	-0.632275	-0.1972	-0.207805	-0.516711
5.28_222.16				222.16		5.28	40	15	15	10	-0.568222	-0.34473	2.74153	0.32	-0.132188	-0.416026	-0.565677	-0.242173	-0.227945	-0.564571
5.27_581.33				581.33		5.27	39	15	15	9	-0.202213	-0.335291	-0.604431	-0.188816	-0.819937	-0.0495551	2.70655	0.0777939	0.0746149	-0.658717
5.27_568.172				568.172		5.27	30	15	15	0	0.478599	0.841939	1.36773	1.09195	-0.491307	0.178182	0.0583419	-0.620553	-1.20933	-1.69556
5.26_914.277				914.277		5.26	30	15	15	0	0.324586	-0.135378	1.97156	1.42227	-0.327173	-0.35049	-0.251718	-0.438725	-0.989742	-1.22519
5.26_630.206				630.206		5.26	30	15	15	0	0.274085	-0.0565504	1.60558	1.63111	-0.179801	-0.0452705	-0.356256	-0.241453	-1.28872	-1.34272
5.26_310.213				310.213		5.26	30	15	15	0	0.856312	-0.53468	0.983711	1.60929	-0.980184	-0.386325	0.860389	-0.265016	-0.75117	-1.39233
5.26_220.11				220.11		5.26	25	0	15	10	<LOD	<LOD	<LOD	<LOD	<LOD	-0.264293	1.52449	0.424716	-0.786685	-0.898229
5.25_774.229				774.229		5.25	30	15	15	0	-0.130404	0.118482	1.63215	1.84155	-0.226521	-0.195522	-0.321054	-0.506617	-1.01142	-1.20063
5.25_308.198				308.198		5.25	21	0	14	7	<LOD	<LOD	<LOD	<LOD	<LOD	-1.23502	0.0100034	1.23304	0.686716	-0.694735
5.24_776.244				776.244		5.24	30	15	15	0	0.0860054	0.259007	1.67604	1.65529	-0.903347	0.0513422	-0.277767	-0.39213	-1.02233	-1.13211
5.24_628.193				628.193		5.24	30	15	15	0	0.192554	-0.533541	1.1817	1.14947	1.5803	-0.0475497	-0.57143	-0.610163	-1.06786	-1.27349
5.24_526.296				526.296		5.24	30	15	15	0	-0.450423	0.0854383	0.906595	2.12022	0.771125	-0.126579	-0.616163	-0.686675	-1.04435	-0.959189
5.24_326.195				326.195		5.24	33	13	13	7	-0.497777	-0.74758	-0.668904	-0.516581	-0.167259	-0.911127	0.966943	2.08474	1.01463	-0.557082
5.22_493.279				493.279		5.22	40	15	15	10	-0.334999	-0.801226	-0.382759	-0.244916	-0.365202	0.00244976	2.73853	0.200546	-0.271689	-0.54073
5.22_284.117				284.117		5.22	40	15	15	10	-0.546955	0.0449758	1.10798	1.90961	0.799572	-0.731367	0.0416593	-0.437586	-0.915444	-1.27245
5.21_581.331				581.331		5.21	39	15	15	9	-0.404625	-0.572846	-0.543024	-0.404259	-0.427205	0.289921	2.7197	0.103006	-0.1723	-0.588372
5.21_287.246				287.246		5.21	33	15	15	3	-0.567897	-0.740728	0.637544	2.06459	0.670091	-0.87431	-0.268358	0.0456826	0.440034	-1.40665
5.21_222.139				222.139		5.21	40	15	15	10	0.236505	0.679653	-0.460318	-0.237828	2.21805	-0.355591	0.692116	-1.21051	-0.820242	-0.741839
5.18_388.293				388.293		5.18	40	15	15	10	-0.516693	-0.282843	2.29762	1.29705	-0.00683061	-0.383362	-0.335446	-0.675005	-0.651666	-0.742824
5.17_614.177				614.177		5.17	30	15	15	0	0.239899	0.28748	1.85327	1.44236	0.0140923	-0.565475	-0.513509	-0.543355	-1.02589	-1.18887
5.17_326.201				326.201		5.17	27	7	15	5	-0.711124	-0.994394	-0.996273	-0.772043	<LOD	0.0621915	1.18231	1.09078	1.48502	-0.346475
5.17_270.139				270.139		5.17	40	15	15	10	0.576084	0.650953	-0.577249	-0.109217	2.12839	-0.280769	0.535633	-0.67651	-1.22513	-1.02218
5.17_208.146				208.146		5.17	40	15	15	10	-0.275168	0.571259	-0.289368	0.595831	2.02673	-0.0558728	0.695441	-1.08149	-1.13181	-1.05555
5.16_493.28				493.28		5.16	40	15	15	10	-0.361495	-0.695373	0.25974	-0.545282	-0.764371	0.058927	2.60005	0.353792	-0.190872	-0.715117
5.14_330.24				330.24		5.14	30	15	15	0	-0.694971	-0.965284	-0.0311455	1.71466	-0.896763	-0.475541	1.66368	0.396999	0.110667	-0.822306
5.13_914.277				914.277		5.13	30	15	15	0	0.2674	-0.291969	1.91548	1.51572	-0.566876	-0.184709	-0.30625	-0.172868	-0.964878	-1.21105
5.13_344.261				344.261		5.13	40	15	15	10	-1.17846	-1.04193	1.91167	0.301124	0.248161	-0.871446	1.05718	0.553581	-0.323694	-0.656183
5.13_237.149				237.149		5.13	40	15	15	10	-0.107472	0.949853	-0.337422	0.171033	1.92968	-0.383805	0.880967	-1.17352	-0.794682	-1.13463
5.12_432.175				432.175		5.12	27	4	15	8	<LOD	<LOD	-0.575674	-0.736691	<LOD	-0.558031	1.81732	0.95027	-0.127401	-0.769796
5.12_396.189				396.189		5.12	22	0	14	8	<LOD	<LOD	<LOD	<LOD	<LOD	-0.837283	1.25689	0.864986	-0.372221	-0.912375
5.12_382.194				382.194		5.12	25	0	15	10	<LOD	<LOD	<LOD	<LOD	<LOD	-0.787167	1.36088	0.707243	-0.318191	-0.962769
5.12_380.216				380.216		5.12	23	0	15	8	<LOD	<LOD	<LOD	<LOD	<LOD	-0.822987	1.26228	0.827987	-0.28667	-0.980611
5.12_312.23				312.23		5.12	25	0	15	10	<LOD	<LOD	<LOD	<LOD	<LOD	-0.77805	1.19583	0.930721	-0.366697	-0.981799
5.12_294.219		C18H30O3	294.219	294.219	0.49	5.12	23	0	14	9	<LOD	<LOD	<LOD	<LOD	<LOD	-0.736596	1.42118	0.653187	-0.427862	-0.909913
5.11_244.167				244.167		5.11	40	15	15	10	0.0643121	-0.299322	2.50943	0.100425	0.372523	-0.617712	0.138764	-0.972264	-0.27793	-1.01823
5.1_674.199				674.199		5.1	30	15	15	0	0.600893	-0.504489	2.00064	0.621905	0.395924	0.021401	0.108907	-0.661162	-1.13342	-1.4506
5.08_524.282				524.282		5.08	28	15	13	0	-0.447654	0.136017	1.09858	2.278	0.257106	-0.471123	-0.659591	-0.540157	-0.766964	-0.884213
5.08_466.276				466.276		5.08	22	15	7	0	-0.309357	-0.114909	1.12788	1.64891	0.448323	-0.739494	-0.913178	-1.14818	<LOD	<LOD
5.07_445.979				445.979		5.07	40	15	15	10	0.0992332	0.61339	0.130293	-0.0216037	1.91781	-0.663104	0.936661	-1.318	-0.38456	-1.31012
5.07_381.978				381.978		5.07	40	15	15	10	0.0286952	0.763911	-0.0230615	0.415474	1.87526	-0.506289	0.7985	-1.30485	-0.895619	-1.15202
5.06_932.287				932.287		5.06	30	15	15	0	0.172619	-0.0730292	1.94376	1.47415	-0.318807	-0.350462	-0.36199	-0.209113	-1.03442	-1.24271
5.05_236.104				236.104		5.05	22	0	12	10	<LOD	<LOD	<LOD	<LOD	<LOD	1.00431	1.15867	-0.492979	-0.910328	-0.759678
5.04_354.11				354.11		5.04	30	15	15	0	-0.150466	1.3067	-0.760513	0.913081	0.758395	0.424401	0.558049	-0.116262	-0.979243	-1.95414
5.02_316.188				316.188		5.02	40	15	15	10	-0.116487	0.285215	2.4368	0.641959	-0.0436936	-0.155452	-0.428775	-0.800901	-0.751511	-1.06716
4-hydroxyacetophenone fragment 2		C8H8O2	136.052	136.052	0.4	3.17	35	15	15	5	-0.387916	-0.83261	-1.00289	-1.0799	0.780487	1.38812	1.69344	0.332003	-0.253542	-0.637191
4-hydroxyacetophenone fragment 1		C8H8O2	136.052	136.052	0.4	2.67	29	14	15	0	0.960741	0.142036	1.12667	0.988981	-0.563262	0.808252	0.232953	-1.1276	-0.957453	-1.61131
4_552.202				552.202		4	30	15	15	0	-1.32986	-1.13702	-0.467911	0.201014	-0.674676	-0.711968	0.637244	0.848615	1.56281	1.07174
4.99_356.036				356.036		4.99	40	15	15	10	0.220305	1.21163	-1.10488	-0.37546	1.71178	0.0314939	0.877848	-1.23003	-0.723903	-0.618784
4.99_224.035				224.035		4.99	40	15	15	10	-0.2168	0.698945	0.0853677	-0.589203	1.61411	-0.080064	1.34745	-1.6875	-0.31425	-0.858054
4.98_254.152				254.152		4.98	40	15	15	10	0.37941	-0.0593127	1.07724	0.687312	1.44597	-1.1093	0.576795	-1.22841	-0.389508	-1.38019
4.98_210.162				210.162		4.98	40	15	15	10	0.415929	-0.143026	1.21317	0.687698	1.41603	-1.03855	0.519255	-1.19691	-0.536363	-1.33723
4.98_178.099				178.099		4.98	40	15	15	10	-0.318382	0.606485	-0.33554	-0.0157159	2.09557	0.0499171	0.905971	-1.30594	-0.637913	-1.04445
4.96_676.215				676.215		4.96	30	15	15	0	0.98502	-1.2593	1.19481	0.0196606	0.864277	-0.13703	1.06106	-0.27783	-1.07657	-1.3741
4.96_512.282				512.282		4.96	30	15	15	0	-0.417481	0.0915957	1.1969	2.07668	0.660147	-0.679319	-0.618344	-0.675091	-0.81509	-0.82
4.95_362.097				362.097		4.95	40	15	15	10	-0.497244	0.526233	-0.695479	0.395274	2.31207	-0.32073	0.469703	-0.534281	-0.322385	-1.33317
4.93_730.187				730.187		4.93	30	15	15	0	0.303679	-0.0798257	2.03608	1.16503	-0.273351	-0.312607	-0.388988	0.023883	-1.15317	-1.32074
4.93_616.193				616.193		4.93	30	15	15	0	0.517243	-0.00173175	1.91786	1.1323	-0.389134	-0.201092	-0.396273	0.0240863	-1.17088	-1.43238
4.93_496.173				496.173		4.93	30	15	15	0	0.504211	0.0338515	2.01325	1.12362	-0.306423	-0.243716	-0.423856	-0.263131	-1.05264	-1.38517
4.91_368.222				368.222		4.91	40	15	15	10	-0.742242	1.01798	0.910176	1.52767	1.03178	-1.16634	-0.472946	-0.790775	-0.893934	-0.421373
4.9_194.094				194.094		4.9	40	15	15	10	-0.018226	0.595325	0.245907	0.497466	2.1624	-0.759079	0.242849	-0.907838	-0.826095	-1.23271
4.85_282.148				282.148		4.85	24	12	9	3	-0.193472	-0.333101	2.83931	-0.199529	-0.328514	-0.392562	-0.314745	-0.380652	-0.321701	-0.375032
4.83_338.115				338.115		4.83	30	15	15	0	-0.039648	-0.035417	1.85606	1.32573	-0.341619	-0.289692	-0.297441	0.37289	-1.03764	-1.51322
4.83_230.152				230.152		4.83	40	15	15	10	0.137656	-0.158206	2.30759	0.210477	0.629569	-0.473956	0.238493	-1.09339	-0.679359	-1.11887
4.8_510.267				510.267		4.8	30	15	15	0	0.0147666	0.267446	1.66534	1.68556	0.0193483	-0.63189	-0.139826	-0.723532	-0.929837	-1.22738
4.8_252.135				252.135		4.8	40	15	15	10	-0.054061	1.01272	0.0827379	-0.0620297	1.8963	-0.613298	0.851667	-1.02397	-0.921227	-1.16884
4.78_512.282				512.282		4.78	30	15	15	0	-0.304701	0.244595	1.33231	2.13508	0.11184	-0.671953	-0.617559	-0.656453	-0.786816	-0.786336
4.77_395.983				395.983		4.77	40	15	15	10	-0.194188	0.288776	0.136488	0.631036	1.90976	-0.821151	0.897407	-0.991565	-0.367635	-1.48893
4.77_331.987				331.987		4.77	40	15	15	10	-0.196162	0.000919437	0.276841	1.39447	1.38815	-0.84014	1.00953	-0.849498	-0.79076	-1.39335
4.76_558.267				558.267		4.76	21	12	9	0	<LOD	-0.912933	0.0261991	1.97836	0.504123	<LOD	<LOD	-0.844889	-0.34311	-0.40775
4.75_330.24				330.24		4.75	40	15	15	10	-0.907563	-1.04101	-0.265985	-0.0337632	-0.780164	-0.151634	2.03117	0.945545	0.922896	-0.719488
4.74_524.246				524.246		4.74	30	15	15	0	-0.413729	-0.0532064	1.36838	2.02735	0.572976	-0.707702	-0.61473	-0.538304	-0.814285	-0.82675
4.74_452.26				452.26		4.74	30	15	15	0	0.011627	0.0213334	1.58749	1.89988	-0.00320765	-0.639866	-0.489023	-0.808384	-0.390102	-1.18975
4.73_496.251				496.251		4.73	30	15	15	0	-0.0339836	0.39035	1.82014	1.52621	-0.0464078	-0.618883	-0.231616	-0.726094	-0.845435	-1.23428
4.71_282.15				282.15		4.71	14	11	0	3	-0.422628	-0.528455	1.78409	-0.338353	-0.494649	<LOD	<LOD	<LOD	<LOD	<LOD
4.69_616.193				616.193		4.69	30	15	15	0	0.578959	-0.159186	2.02218	1.00593	-0.347847	-0.383235	-0.366879	0.139097	-1.14731	-1.34172
4.68_380.204				380.204		4.68	23	15	8	0	-0.507513	-0.295009	0.814376	2.10796	0.649905	-1.03513	<LOD	-0.652295	-0.688894	-0.393403
4.67_566.254				566.254		4.67	30	15	15	0	-0.601388	-0.274931	0.95651	2.17064	0.838448	-0.810427	-0.153892	-0.787366	-0.806909	-0.530687
4.67_498.267				498.267		4.67	33	15	15	3	-0.48045	0.0515704	1.08823	2.14821	0.688873	-0.652087	-0.555336	-0.674358	-0.78519	-0.829465
4.67_488.238				488.238		4.67	30	15	15	0	-0.470164	0.0275331	1.15814	2.09372	0.633012	-0.916699	-0.239538	-0.718747	-0.712591	-0.854662
4.66_712.198				712.198		4.66	27	14	13	0	-0.790556	-0.0275673	0.952885	-0.54222	0.659658	-0.833794	-0.305706	2.24215	-0.718772	-0.636075
4.65_258.089				258.089		4.65	30	15	15	0	-0.0541648	-0.343352	1.60812	0.275016	1.94267	-0.770598	-0.852907	-0.736377	-0.602178	-0.466231
4.64_206.094				206.094		4.64	20	0	14	6	<LOD	<LOD	<LOD	<LOD	<LOD	-1.27396	-0.878637	0.534332	0.880263	0.738002
4.63_259.215				259.215		4.63	30	15	15	0	-0.55013	-0.339736	0.475504	2.39644	-0.103241	-0.662541	-0.676059	0.334569	0.340941	-1.21575
4.63_243.184				243.184		4.63	40	15	15	10	-0.188382	-0.323988	2.61299	0.526521	0.188774	-0.638906	-0.26469	-0.622328	-0.54165	-0.748344
4.63_170.094				170.094		4.63	37	15	15	7	-0.121261	0.295504	-0.448088	-1.37435	0.739305	1.22085	0.74941	1.24432	-1.11259	-1.19311
4.62_512.247				512.247		4.62	29	15	14	0	-0.694586	0.680159	0.297703	2.32262	0.274007	-0.413355	-0.284397	-1.15396	-0.952674	-0.0755205
4.61_436.231				436.231		4.61	27	14	13	0	0.0906291	0.0805055	1.89629	1.50354	-0.0175639	-0.249482	-0.34519	-1.1046	-0.990205	-0.863927
4.6_676.214				676.214		4.6	30	15	15	0	0.735373	-0.994343	1.04924	0.730103	1.42804	-0.00728115	0.167488	-0.449066	-1.20553	-1.45402
4.6_508.251				508.251		4.6	30	15	15	0	-0.181298	0.355369	1.60407	1.21054	1.12306	-0.69009	-0.695866	-0.654988	-1.097	-0.973796
4.59_568.227				568.227		4.59	27	13	14	0	-0.523783	0.0804162	1.30448	1.98396	0.650608	-0.770176	-0.859719	-0.433024	-0.95296	-0.479799
4.59_566.254				566.254		4.59	30	15	15	0	-0.503207	0.00712627	1.17346	2.07331	0.758895	-0.679574	-0.576394	-0.677446	-0.783878	-0.792294
4.59_515.258				515.258		4.59	30	15	15	0	-0.531158	0.344681	0.927597	2.00299	0.945582	-0.748429	-0.487092	-0.801023	-0.942899	-0.710245
4.59_498.268				498.268		4.59	33	15	15	3	-0.510193	0.041639	1.02158	2.22257	0.629645	-0.683473	-0.529626	-0.657156	-0.751198	-0.783779
4.59_490.236				490.236		4.59	30	15	15	0	-0.572502	0.0488703	0.984334	2.19675	0.736173	-0.770795	-0.58314	-0.719668	-0.730487	-0.589538
4.59_488.238				488.238		4.59	30	15	15	0	-0.543479	0.133228	1.04858	2.12313	0.749032	-0.697474	-0.516161	-0.699102	-0.781825	-0.815932
4.59_452.261				452.261		4.59	30	15	15	0	-0.447358	0.0411413	1.00613	2.20755	0.667699	-0.536613	-0.632847	-0.724032	-0.750316	-0.83135
4.56_436.231				436.231		4.56	27	15	12	0	0.441002	0.761481	1.67627	1.19421	-0.383463	0.0620045	-0.44902	-1.07355	-1.09775	-1.13118
4.55_252.103				252.103		4.55	40	15	15	10	-0.65527	-0.553105	0.853251	1.2748	1.62418	-0.19195	-0.0174362	-0.966014	0.142476	-1.51094
4.54_198.068				198.068		4.54	40	15	15	10	-1.02987	-0.631684	-0.274717	1.82194	1.71688	-0.588612	-0.834568	0.0107395	0.16628	-0.356381
4.53_566.254				566.254		4.53	30	15	15	0	-0.431836	0.270986	1.16274	2.10328	0.539569	-0.747797	-0.650823	-0.683767	-0.746413	-0.815941
4.53_515.257				515.257		4.53	30	15	15	0	-0.381117	0.133102	1.43529	1.96325	0.474035	-0.796036	-0.716192	-0.539106	-0.678999	-0.894225
4.53_498.267				498.267		4.53	33	15	15	3	-0.370592	0.0137232	0.976751	2.2617	0.574159	-0.849384	-0.48373	-0.645582	-0.723768	-0.753276
4.53_488.238				488.238		4.53	30	15	15	0	-0.594098	0.513842	1.33241	1.82447	0.630372	-0.819049	-0.500374	-0.600253	-0.855797	-0.931523
4.53_452.262				452.262		4.53	30	15	15	0	-0.60777	0.182232	1.30222	1.98477	0.649582	-0.732843	-0.544073	-0.589945	-0.883641	-0.760538
4.52_216.136				216.136		4.52	40	15	15	10	0.24804	-0.410494	2.50295	0.188261	0.518794	-0.593327	-0.17258	-0.860576	-0.525481	-0.895589
4.5_496.251				496.251		4.5	30	15	15	0	-0.528475	-0.0651613	0.906339	2.36353	0.493849	-0.67176	-0.670326	-0.437313	-0.750066	-0.640621
4.49_498.267				498.267		4.49	33	15	15	3	-0.285181	-0.099194	0.622165	2.48398	0.501457	-0.634702	-0.572417	-0.664167	-0.590411	-0.761528
4.49_282.15				282.15		4.49	33	14	15	4	-0.0875717	-0.466043	2.81703	-0.270387	-0.483697	-0.462448	-0.202615	-0.296808	-0.414342	-0.133117
4.49_224.105				224.105		4.49	40	15	15	10	-0.320743	0.650224	0.708818	0.844419	1.7298	-0.918931	0.412136	-0.906389	-1.02119	-1.17814
4.48_528.272				528.272		4.48	30	15	15	0	0.844946	-0.0186988	0.569962	2.21507	-0.0584596	-0.822438	-0.148245	-0.652047	-0.785108	-1.14498
4.48_526.261				526.261		4.48	37	15	15	7	-0.55963	-0.429574	1.21468	2.23907	0.480941	-0.51689	-0.480338	-0.541422	-0.676076	-0.730753
4.48_372.048				372.048		4.48	40	15	15	10	-0.409323	1.16523	-0.211625	0.156421	2.10555	-0.146541	0.194842	-1.16503	-0.591611	-1.09791
4.47_570.287				570.287		4.47	30	15	15	0	-1.0792	-0.184411	1.64151	1.81719	-0.0141426	-1.15501	-0.577395	0.0529268	-0.185808	-0.315649
4.46_592.306				592.306		4.46	24	15	9	0	-0.52289	-0.0528597	0.906155	1.81896	0.496236	-0.92786	-0.78281	-0.93493	<LOD	<LOD
4.46_282.15				282.15		4.46	33	14	15	4	-0.23594	-0.377726	2.81943	-0.0195868	-0.478223	-0.460088	-0.289043	-0.371484	-0.387712	-0.199627
4.45_556.269				556.269		4.45	30	15	15	0	-0.74936	-0.570688	1.67153	1.15675	-0.156479	-1.14993	-0.531447	1.35205	-0.529669	-0.492768
4.45_389.825				389.825		4.45	38	13	15	10	-0.836898	-0.826456	-0.731756	-0.600991	-0.530195	-0.557909	0.0822625	0.643573	1.49579	1.86258
4.44_514.262				514.262		4.44	30	15	15	0	-0.630909	0.168663	1.02628	2.04282	0.898822	-0.69866	-0.622963	-0.513063	-0.878578	-0.792411
4.44_338.198				338.198		4.44	33	15	15	3	1.60666	0.002711	1.47971	0.896502	0.103748	-0.695802	-1.01176	-0.873447	-0.810797	-0.697523
4.44_338.193				338.193		4.44	30	15	15	0	1.84118	-0.734352	-0.876856	-0.682538	1.76647	0.157416	-0.666247	-0.39549	-0.262654	-0.146923
4.44_281.991				281.991		4.44	40	15	15	10	-0.169633	0.82928	0.302286	0.822616	1.69071	-0.683431	0.462924	-0.948711	-0.696603	-1.60943
4.43_578.236				578.236		4.43	30	15	15	0	-0.402686	-0.0100342	1.66832	1.70283	0.424968	-1.05833	-0.174324	-0.283436	-0.93566	-0.931653
4.43_496.25				496.25		4.43	30	15	15	0	-0.335648	-0.101027	1.11419	2.24786	0.474932	-0.686448	-0.659656	-0.513277	-0.758713	-0.782206
4.42_526.261				526.261		4.42	37	15	15	7	-0.733703	-0.188481	0.525908	2.19569	1.1863	-0.582356	-0.567095	-0.580739	-0.367944	-0.887587
4.42_438.133				438.133		4.42	30	15	15	0	0.110963	0.309018	1.35941	1.2772	-1.04988	-0.0539266	0.187561	0.610956	-1.13635	-1.61495
4.4_462.244				462.244		4.4	28	15	13	0	-0.446817	-0.0484396	0.229347	1.2334	2.24153	-0.870082	-0.377367	-0.551185	-0.735591	-0.674792
4.39_210.1				210.1		4.39	40	15	15	10	-0.09088	-0.495223	0.586795	2.63675	-0.0132117	-0.383653	-0.378925	-0.572991	-0.636229	-0.652432
4.38_338.193				338.193		4.38	30	15	15	0	2.11077	-0.175527	1.23373	0.321721	0.230324	-0.573311	-0.713255	-0.819893	-0.912576	-0.701978
4.37_642.154				642.154		4.37	35	15	15	5	-0.502979	1.60112	0.540634	-0.758285	0.533725	-1.11323	-0.346571	1.56823	-0.924628	-0.598011
4.37_564.139				564.139		4.37	26	14	12	0	-0.579683	1.0739	0.240294	-0.906599	0.94196	-1.08038	0.025479	1.82294	-0.956285	-0.581624
4.37_484.252		C21H40O12	484.252	484.252	-0.02	4.37	37	15	15	7	-0.408645	0.468858	1.37539	1.97593	0.251766	-0.736365	-0.512007	-0.761965	-0.789887	-0.863076
4.36_498.232				498.232		4.36	30	15	15	0	-1.13289	-0.250803	-0.155443	-0.736215	-0.120832	-0.0892434	1.64123	-0.895731	1.88369	-0.143763
4.33_328.225				328.225		4.33	23	0	15	8	<LOD	<LOD	<LOD	<LOD	<LOD	-0.927731	0.156708	1.49712	0.189115	-0.915214
4.33_229.168				229.168		4.33	40	15	15	10	-0.0705124	-0.439753	2.69837	0.399891	-0.050234	-0.534305	-0.358826	-0.546839	-0.403699	-0.694093
4.32_396.234				396.234		4.32	30	15	15	0	0.0475011	0.594333	1.19096	1.67238	0.458851	-0.683391	-0.152775	-0.554845	-1.05165	-1.52136
4.32_274.177				274.177		4.32	30	15	15	0	1.24305	-0.512396	0.0429453	0.734818	1.36177	-0.67813	0.811803	-0.415746	-1.01556	-1.57256
4.3_574.159				574.159		4.3	40	15	15	10	-0.117002	-0.407282	-0.24659	-0.242417	-0.267345	-0.364708	-0.413527	2.83297	-0.392321	-0.381775
4.3_498.23				498.23		4.3	30	15	15	0	-1.4431	-0.273646	0.583442	2.18049	0.135688	-1.1812	0.396485	-0.357133	0.135056	-0.176093
4.3_496.25				496.25		4.3	30	15	15	0	-0.465059	-0.638905	1.01535	2.14113	0.937026	-0.717658	-0.482225	-0.434964	-0.559567	-0.795133
4.3_496.155				496.155		4.3	15	0	15	0	<LOD	<LOD	<LOD	<LOD	<LOD	-1.28938	0.60142	1.06454	-0.809435	0.432855
4.29_428.168				428.168		4.29	15	0	15	0	<LOD	<LOD	<LOD	<LOD	<LOD	-1.29802	0.46713	1.09304	-0.789797	0.527645
4.29_220.11				220.11		4.29	15	0	15	0	<LOD	<LOD	<LOD	<LOD	<LOD	-1.28703	0.597301	1.06221	-0.814386	0.441908
4.29_185.99				185.99		4.29	40	15	15	10	-0.0622048	0.401867	-0.594127	-0.381082	2.07279	-0.0841874	1.28837	-0.965288	-0.703002	-0.973135
4.28_188.141				188.141		4.28	38	15	15	8	-0.439983	-0.617994	-0.346949	-0.191455	-0.40066	-0.436569	0.588626	2.65656	-0.103087	-0.708485
4.27_530.237				530.237		4.27	18	12	6	0	<LOD	-0.620634	0.202351	1.93112	0.597808	<LOD	<LOD	-0.741448	-0.674753	-0.69444
4.26_604.197				604.197		4.26	30	15	15	0	-0.31341	0.905919	0.878698	1.40765	1.31224	-0.858763	-0.616018	-1.04405	-0.848636	-0.82362
4.26_583.168				583.168		4.26	30	15	15	0	-0.0592177	0.99362	0.677401	1.47729	1.23882	-0.777197	-0.647652	-0.949031	-0.978479	-0.975556
4.26_578.257				578.257		4.26	30	15	15	0	-0.22164	0.811213	1.538	1.45828	0.542618	-0.947745	-0.553638	-0.901727	-0.858685	-0.866685
4.26_568.213				568.213		4.26	30	15	15	0	-0.33609	0.860206	1.41086	1.45075	0.73544	-0.987072	-0.569879	-0.755529	-0.852183	-0.956504
4.26_552.239				552.239		4.26	30	15	15	0	-0.448626	1.01306	1.12806	1.14399	1.24775	-0.914324	-0.33422	-0.913854	-0.911935	-1.0099
4.26_538.172				538.172		4.26	30	15	15	0	-0.095879	1.06648	0.39583	1.5302	1.30588	-1.03204	-0.577114	-0.882873	-0.786818	-0.923671
4.26_528.274				528.274		4.26	30	15	15	0	-0.6753	-0.0111255	0.834059	2.22601	0.874663	-0.689906	-0.540162	-0.63887	-0.669625	-0.709744
4.26_526.22				526.22		4.26	30	15	15	0	-0.247873	0.964741	1.14477	1.11387	1.2692	-1.05477	-0.451256	-0.823765	-0.863732	-1.05118
4.26_508.211				508.211		4.26	30	15	15	0	-0.219058	0.484933	1.59778	1.14951	1.12336	-0.900432	-0.477591	-0.94684	-0.859854	-0.951803
4.26_501.241				501.241		4.26	30	15	15	0	-0.140583	0.584325	1.44431	1.59335	0.63876	-0.986094	-0.453644	-0.777071	-0.872283	-1.03107
4.26_476.22				476.22		4.26	30	15	15	0	-0.350647	0.67419	1.60214	1.36868	0.753419	-0.919611	-0.551085	-0.675649	-0.927067	-0.974371
4.26_474.223				474.223		4.26	30	15	15	0	-0.28853	0.746611	1.48755	1.52388	0.596518	-0.977986	-0.494711	-0.753018	-0.86159	-0.978725
4.25_580.301				580.301		4.25	34	15	15	4	-0.2477	0.741195	0.873951	2.08576	0.400225	-0.997417	-0.58331	-0.573172	-0.790244	-0.909289
4.25_554.215				554.215		4.25	30	15	15	0	-0.453055	0.538024	1.72173	0.968504	1.17463	-0.85798	-0.515536	-0.817591	-0.935188	-0.82354
4.25_554.214				554.214		4.25	30	15	15	0	0.101418	0.99425	1.10158	1.67081	0.382671	-0.867719	-0.428857	-0.988347	-0.939662	-1.02615
4.25_536.221				536.221		4.25	30	15	15	0	-0.360976	0.337462	1.41444	1.95626	0.255847	-0.920266	-0.388555	-0.64008	-0.618358	-1.03577
4.25_523.26				523.26		4.25	30	15	15	0	-0.35415	0.931051	1.23924	1.58183	0.659375	-1.04509	-0.464432	-0.65317	-0.894251	-1.0004
4.25_494.234				494.234		4.25	30	15	15	0	0.0608777	-0.214985	2.1111	1.06629	0.338592	-0.820296	-0.256609	-0.160367	-1.3942	-0.730401
4.25_484.252		C21H40O12	484.252	484.252	-0.02	4.25	38	15	15	8	-0.688837	0.580485	1.44357	1.71765	0.616774	-0.859524	-0.497497	-0.714282	-0.791768	-0.806566
4.25_438.246				438.246		4.25	30	15	15	0	-0.266155	0.532203	1.39474	1.77007	0.549436	-0.911248	-0.534554	-0.770604	-0.880256	-0.883631
4.24_698.384				698.384		4.24	30	15	15	0	0.156104	-0.469564	-0.292204	-1.13559	0.574503	-1.59839	-0.547385	1.31489	0.513311	1.48433
4.24_442.22				442.22		4.24	15	0	15	0	<LOD	<LOD	<LOD	<LOD	<LOD	-1.29791	-0.318709	1.37121	-0.26686	0.51227
4.23_508.247				508.247		4.23	30	15	15	0	-0.18735	0.794956	-0.104881	0.0433878	2.02846	-0.279476	0.849191	-1.10689	-1.24835	-0.78904
4.22_710.398				710.398		4.22	30	15	15	0	-0.281028	0.968035	1.45638	1.06503	1.00336	-0.998383	-0.481767	-0.885567	-0.873986	-0.972073
4.22_584.335				584.335		4.22	29	15	14	0	0.312406	0.55912	1.41949	1.68599	0.111274	-0.690643	-0.631241	-0.491891	-1.04848	-1.22603
4.22_436.265				436.265		4.22	29	15	14	0	0.0421569	0.522714	2.04226	1.21255	-0.211492	-0.459687	-0.300526	-0.799338	-1.03197	-1.01667
4.22_376.281				376.281		4.22	38	15	15	8	-0.320152	-0.15246	0.43824	0.27602	-0.462752	-1.01744	0.247562	2.46726	-0.494905	-0.981374
4.21_374.266				374.266		4.21	28	15	13	0	0.116951	0.741205	1.48762	1.36605	0.293512	-0.795488	-0.686437	-0.0164293	-1.14186	-1.36512
4.21_272.156				272.156		4.21	40	15	15	10	-0.0738278	1.33403	-0.834003	-0.832263	2.00136	-0.248564	0.646661	-0.640971	-0.586943	-0.765477
4.2_566.216				566.216		4.2	10	5	5	0	<LOD	-0.426407	<LOD	1.67192	0.881139	-1.15008	-0.906912	<LOD	0.187517	-0.257175
4.2_498.23				498.23		4.2	30	15	15	0	-0.773759	-0.127711	0.6062	2.33869	0.84777	-0.894144	-0.414866	-0.426542	-0.641219	-0.514418
4.2_420.161				420.161		4.2	29	14	15	0	-1.22208	-1.15991	-0.991668	-0.623356	-0.366321	0.501767	0.738621	0.414294	1.44804	1.26062
4.2_352.173		C15H28O9	352.173	352.173	0.33	4.2	30	15	15	0	-1.37453	-1.17953	-0.686704	-0.399395	-0.565604	0.209871	0.347891	0.883773	1.35259	1.41165
4.2_342.144				342.144		4.2	28	13	15	0	-1.1933	-0.894208	-0.833194	-0.924623	-0.543951	0.484291	0.332008	0.724014	1.47003	1.37893
4.2_336.177				336.177		4.2	19	4	15	0	<LOD	<LOD	-1.23151	-0.406624	-0.904016	-0.0995157	1.23196	1.67107	0.140016	-0.40138
4.19_482.236				482.236		4.19	30	15	15	0	-0.613035	0.439923	1.35595	1.58638	1.00362	-0.874089	-0.36124	-0.711523	-0.90084	-0.925147
4.19_266.882				266.882		4.19	40	15	15	10	0.254131	0.0814633	-1.11604	-0.972959	2.01975	0.137171	1.24383	-0.859135	-0.24832	-0.539886
4.19_264.885				264.885		4.19	40	15	15	10	0.307191	0.37144	-1.34252	-0.87577	1.7756	0.210992	1.29764	-1.00245	-0.235216	-0.506908
4.19_202.12				202.12		4.19	40	15	15	10	-0.693639	-0.70695	-0.395154	-0.694971	-0.626378	-0.203711	1.69161	1.95741	0.151519	-0.479739
4.19_166.987				166.987		4.19	40	15	15	10	-0.0225402	0.921536	-0.7681	-0.496583	2.00862	0.0944411	0.880422	-1.14599	-0.513779	-0.958028
4.17_554.203				554.203		4.17	30	15	15	0	0.54829	0.166282	1.58497	1.81136	-0.621585	-0.493368	-0.705522	-0.753036	-0.735622	-0.801768
4.17_522.206				522.206		4.17	27	14	13	0	0.301752	0.177649	1.83835	1.23403	0.175009	-0.726733	0.15801	-0.973803	-0.922524	-1.26173
4.17_470.236				470.236		4.17	34	15	15	4	-0.330056	0.721466	1.00755	1.71647	0.966449	-0.836164	-0.517139	-0.828155	-0.858353	-1.04206
4.17_464.225				464.225		4.17	30	15	15	0	0.71776	0.805598	0.638302	0.489742	1.16625	0.479126	-0.47715	-0.730131	-1.36368	-1.72582
4.17_425.233				425.233		4.17	34	14	15	5	0.951032	1.34245	0.178018	-0.560094	1.67192	-0.369638	-0.388995	-1.30941	-0.790094	-0.725191
4.17_424.231				424.231		4.17	30	15	15	0	0.7681	1.20258	0.262481	-0.391045	1.62101	-0.108944	0.118431	-0.954779	-1.19954	-1.3183
4.17_420.198				420.198		4.17	30	15	15	0	0.854243	0.655331	1.21984	1.11373	0.568	-0.537149	-1.04797	-0.296588	-1.02388	-1.50557
4.16_901.371				901.371		4.16	29	14	15	0	0.251881	0.473092	1.49099	1.55256	0.550923	-0.834961	-0.723222	-0.846377	-0.903694	-1.01119
4.16_590.182				590.182		4.16	30	15	15	0	0.33053	0.839298	0.747678	1.43636	1.04153	-0.724924	-0.297747	-1.04349	-0.986234	-1.34301
4.16_540.2				540.2		4.16	30	15	15	0	0.416476	0.945298	0.682213	0.808519	1.44326	-0.804182	-0.00395585	-1.13778	-1.05512	-1.29472
4.16_538.223				538.223		4.16	30	15	15	0	-0.128999	1.35967	0.793488	0.590084	1.37702	-0.794801	0.062476	-1.088	-0.879519	-1.29141
4.16_523.147				523.147		4.16	30	15	15	0	0.542834	0.226105	1.2123	0.875914	1.30852	-0.992472	0.117512	-1.07795	-0.887094	-1.32566
4.16_494.195				494.195		4.16	30	15	15	0	0.0485056	1.40885	1.41372	0.452585	0.712458	-0.881313	0.07274	-1.06766	-0.926129	-1.23375
4.16_487.225				487.225		4.16	30	15	15	0	0.0362435	1.13763	0.505765	1.37217	1.24804	-0.735465	-0.479975	-0.948674	-0.900126	-1.23561
4.16_462.205				462.205		4.16	30	15	15	0	-0.0169497	0.730111	1.33246	1.01691	1.19893	-0.794848	-0.263048	-0.91529	-0.966953	-1.32133
4.16_460.207				460.207		4.16	30	15	15	0	0.618188	0.439494	1.45979	1.30677	0.301499	-0.923615	-0.0236783	-0.741226	-0.971554	-1.46567
4.15_569.151				569.151		4.15	30	15	15	0	0.109472	0.745546	0.6171	0.219992	1.98941	-0.138108	-0.0798428	-1.22497	-1.03697	-1.20163
4.15_518.2				518.2		4.15	30	15	15	0	-0.672459	0.27099	0.757329	2.04695	0.966348	-0.616578	-0.138719	-0.659891	-0.848246	-1.10572
4.15_430.147				430.147		4.15	25	15	10	0	0.122536	-0.17171	1.79641	1.33783	0.0321184	-0.14433	-0.560957	0.243172	-1.23214	-1.42294
4.14_297.849				297.849		4.14	23	0	13	10	<LOD	<LOD	<LOD	<LOD	<LOD	-1.51022	-0.353961	0.168368	0.595202	1.10061
4.14_295.851				295.851		4.14	33	8	15	10	<LOD	<LOD	-1.15952	-0.736578	-0.581975	-0.921627	0.133679	0.639728	1.15651	1.46978
4.14_293.853				293.853		4.14	23	0	13	10	<LOD	<LOD	<LOD	<LOD	<LOD	-1.42631	-0.559149	0.186445	0.902343	0.896668
4.13_714.381				714.381		4.13	35	15	15	5	-1.02719	-0.931268	0.0881386	0.0431265	0.354628	-1.3837	-0.738378	1.08471	0.975736	1.5342
4.13_569.153				569.153		4.13	30	15	15	0	-0.405903	0.71508	0.657255	0.274075	2.04053	-0.57738	0.363286	-1.19228	-0.870358	-1.0043
4.13_496.215				496.215		4.13	30	15	15	0	-0.450854	0.342534	1.46378	2.03888	-0.135943	-0.697737	-0.369578	-0.428372	-0.862478	-0.900237
4.13_494.236				494.236		4.13	30	15	15	0	-0.241415	0.223257	1.3898	1.8958	0.583893	-0.738938	-0.5746	-0.809658	-0.849816	-0.878315
4.12_642.212				642.212		4.12	12	0	12	0	<LOD	<LOD	<LOD	<LOD	<LOD	<LOD	-1.36122	0.441874	-0.0547275	0.974076
4.12_572.266				572.266		4.12	15	0	15	0	<LOD	<LOD	<LOD	<LOD	<LOD	-1.27072	-0.766217	0.65958	0.233381	1.14397
4.12_556.22				556.22		4.12	30	15	15	0	1.50069	1.20562	1.34759	0.00596534	-0.637001	-0.462698	-0.818335	-0.949984	-0.0592118	-1.13264
4.12_220.11				220.11		4.12	12	0	12	0	<LOD	<LOD	<LOD	<LOD	<LOD	<LOD	-1.31808	0.446457	-0.148769	1.02039
4.11_550.255				550.255		4.11	28	15	13	0	-0.15284	0.419465	2.10092	0.741661	0.639146	-0.894028	-0.215408	-0.483706	-0.963256	-1.19195
4.11_482.269				482.269		4.11	29	15	14	0	0.232901	0.660283	1.08903	1.91227	0.135153	-0.483793	-0.452637	-0.914732	-1.09997	-1.0785
4.11_482.235				482.235		4.11	30	15	15	0	-0.755369	0.343991	1.90228	1.43822	0.415878	-1.03356	-0.423063	-0.657274	-0.699102	-0.531998
4.11_468.22				468.22		4.11	30	15	15	0	-0.548999	-0.0920148	0.353807	0.444364	0.0128261	-0.747392	-0.517572	-0.756697	-0.694949	2.54663
4.11_352.077				352.077		4.11	18	0	14	4	<LOD	<LOD	<LOD	<LOD	<LOD	-1.01164	0.00195306	1.60671	0.0307474	-0.627772
4.11_302.095				302.095		4.11	31	10	15	6	-0.0109361	1.19203	0.302019	-1.10717	1.89849	-1.02336	-0.496021	0.604215	-0.485398	-0.873865
4.11_274.214				274.214		4.11	25	15	10	0	-0.318555	0.185977	1.64249	1.60281	0.0934944	-0.902966	-0.722781	-0.761007	-0.819465	<LOD
4.11_186.126				186.126		4.11	21	0	14	7	<LOD	<LOD	<LOD	<LOD	<LOD	-0.865989	-0.189365	1.70044	-0.0831248	-0.561961
4.1_718.228				718.228		4.1	30	15	15	0	-0.203649	-0.611675	0.768404	0.0261492	2.52073	-0.84717	-0.549169	-0.210336	-0.743866	-0.149416
4.1_614.219				614.219		4.1	24	12	12	0	<LOD	-1.42647	-0.473401	-0.275924	-0.23816	<LOD	-0.853397	1.02834	0.722079	1.51693
4.1_546.23				546.23		4.1	30	15	15	0	-1.28832	-0.927122	-0.0197199	0.206308	0.0019399	-1.19721	-0.373793	1.12799	0.714341	1.75558
4.09_538.223				538.223		4.09	30	15	15	0	-0.692213	1.25533	0.201461	2.15809	-0.293532	-0.251309	-0.0437869	-1.18213	-0.70813	-0.44378
4.09_512.246				512.246		4.09	25	14	11	0	-0.667468	-0.308021	0.877434	2.11603	1.11135	-0.656161	-0.506555	-0.675754	-0.638415	-0.652439
4.09_512.244				512.244		4.09	26	15	11	0	-0.0525867	-0.492261	1.08174	1.96364	0.485575	-0.375182	-0.639397	<LOD	-0.981004	-0.990524
4.09_470.236				470.236		4.09	34	15	15	4	-0.0377489	0.600074	1.43025	1.57827	0.550669	-0.842907	-0.280859	-0.928617	-0.978269	-1.09086
4.09_468.22				468.22		4.09	34	15	15	4	-0.0396929	0.595916	1.42763	1.60723	0.498643	-0.824453	-0.262821	-0.887965	-1.07391	-1.04058
4.09_424.23				424.23		4.09	30	15	15	0	0.216759	-0.539838	0.183137	0.161698	-0.759908	2.46875	-0.0257088	-1.30903	0.063952	-0.459809
4.08_504.219				504.219		4.08	30	15	15	0	-0.359229	-0.0339485	0.853394	1.913	-0.184646	-0.84491	-0.600465	1.20914	-1.02904	-0.923298
4.08_464.225				464.225		4.08	30	15	15	0	0.0376441	0.392141	0.985193	1.53324	1.27076	-0.623669	-0.720616	-0.605183	-0.963403	-1.30611
4.08_418.219				418.219		4.08	28	15	13	0	0.169514	0.443616	0.979514	1.40393	1.35037	-0.752872	-0.80131	-0.581946	-0.98482	-1.22599
4.08_214.022				214.022		4.08	40	15	15	10	0.298657	-0.100931	-0.160797	0.661424	1.45106	-0.41406	1.44466	-1.39224	-0.375803	-1.41197
4.07_532.211				532.211		4.07	30	15	15	0	-1.15619	-0.632447	0.209199	0.364866	-0.51348	-1.1968	-0.369798	1.87425	0.105214	1.31519
4.07_368.147				368.147		4.07	15	0	15	0	<LOD	<LOD	<LOD	<LOD	<LOD	-1.37099	-0.284614	1.39586	0.299035	-0.0392918
4.06_514.209				514.209		4.06	30	15	15	0	0.138771	-0.078253	1.95699	1.51662	-0.554422	-1.32588	-0.486023	-0.436221	-0.159375	-0.572205
4.06_482.236				482.236		4.06	30	15	15	0	-1.02575	0.558929	1.67365	1.546	0.260133	-1.21558	-0.522429	-0.661675	-0.314293	-0.298986
4.06_366.056				366.056		4.06	24	0	15	9	<LOD	<LOD	<LOD	<LOD	<LOD	-0.885877	0.742102	1.30147	-0.19119	-0.966504
4.06_316.074				316.074		4.06	24	0	15	9	<LOD	<LOD	<LOD	<LOD	<LOD	-0.932519	0.784983	1.27777	-0.216704	-0.913533
4.06_284.057				284.057		4.06	24	0	15	9	<LOD	<LOD	<LOD	<LOD	<LOD	-0.875069	1.05421	1.03428	-0.208593	-1.00482
4.06_222.087				222.087		4.06	18	0	9	9	<LOD	<LOD	<LOD	<LOD	<LOD	-1.15062	0.593017	1.04331	-0.485712	<LOD
4.06_200.105		C10H16O4	200.105	200.105	-0.14	4.06	33	8	15	10	-0.760483	<LOD	-0.775202	-0.759406	-0.743531	-0.249273	1.39883	1.85	0.372414	-0.333354
4.06_156.115				156.115		4.06	24	0	15	9	<LOD	<LOD	<LOD	<LOD	<LOD	-0.890809	0.814441	1.26606	-0.253856	-0.935837
4.05_566.203				566.203		4.05	30	15	15	0	-0.939327	-0.289649	1.54992	1.22895	1.3956	-1.05198	-0.780402	-0.49004	-0.203011	-0.420064
4.04_374.194				374.194		4.04	30	15	15	0	0.620624	0.369151	1.21795	1.71319	0.115525	-0.536248	-1.02411	-0.248852	-0.82361	-1.40362
4.02_698.382				698.382		4.02	30	15	15	0	-0.364541	-0.687166	2.09532	1.33091	-0.738599	-0.838984	-0.614393	0.205034	-0.688344	0.300761
4.02_500.244				500.244		4.02	24	14	10	0	-0.229737	0.521477	1.00229	1.93419	0.697566	-1.01547	-0.934315	-1.04137	-0.37333	-0.561296
4.02_498.23				498.23		4.02	30	15	15	0	-1.12125	-0.875668	-0.47741	0.392045	-0.0657335	-1.03304	-0.458653	0.455122	1.46075	1.72383
4.02_488.204				488.204		4.02	25	12	13	0	-0.93326	-0.817401	-0.538938	0.02872	-0.253533	-1.08535	-0.384625	0.767967	1.51621	1.70022
4.01_501.205				501.205		4.01	29	14	15	0	-1.28793	-1.04569	-0.47259	0.00428193	-0.812934	-0.0801135	0.00427119	1.9401	1.04968	0.700935
4.01_474.187				474.187		4.01	29	14	15	0	-1.25542	-1.01983	-0.433767	0.154228	-0.789278	-0.790297	0.438724	1.50591	1.27751	0.912212
4.01_215.152				215.152		4.01	40	15	15	10	-0.276992	-0.195856	2.75506	0.152636	0.0339262	-0.530391	-0.320741	-0.63214	-0.474261	-0.511245
3_288.157				288.157		3	30	15	15	0	0.0221243	0.449678	0.8865	1.41108	1.3543	-0.522758	-0.441734	-0.651436	-0.980965	-1.52679
3_210.051				210.051		3	30	15	15	0	-0.0256238	0.847584	1.92562	0.809356	0.310501	-1.01029	-0.292622	-0.279861	-1.02621	-1.25845
3.99_696.371				696.371		3.99	30	15	15	0	0.744955	-0.543188	2.22449	0.271526	-0.964828	-0.973971	-0.445484	0.101643	-0.898013	0.482866
3.99_504.214				504.214		3.99	30	15	15	0	-0.493774	-0.306354	0.454759	0.8894	-0.0233634	-0.651112	-0.774511	2.36191	-0.736592	-0.720367
3.99_490.204				490.204		3.99	30	15	15	0	-0.585323	0.0830475	0.234299	1.35675	0.12715	-0.864449	-0.731396	2.02514	-0.853521	-0.791693
3.99_348.178				348.178		3.99	29	15	14	0	-0.476733	0.220588	1.15732	1.98898	0.779713	-0.717842	-0.455709	-0.719804	-0.860008	-0.916504
3.99_344.219				344.219		3.99	40	15	15	10	0.429458	0.776613	0.275031	1.21476	0.639745	-0.347346	0.841809	-1.72836	-0.714118	-1.38759
3.98_552.202				552.202		3.98	34	15	15	4	-1.31969	-0.94883	-0.236572	0.358283	-0.824857	-0.942018	0.292317	1.06574	1.52188	1.03375
3.98_501.204				501.204		3.98	29	14	15	0	-1.32708	-1.21699	-0.433347	0.550691	-0.917279	-0.414678	0.297919	1.08435	1.47559	0.900818
3.98_484.215				484.215		3.98	30	15	15	0	-1.11828	-0.976659	-0.749194	-0.390831	-0.846187	-0.327389	0.636189	1.10925	1.52789	1.13521
3.98_468.22				468.22		3.98	30	15	15	0	-1.0287	-0.791017	-0.0915418	-0.148113	-0.667442	-0.843399	-0.374331	0.676255	1.32538	1.9429
3.98_458.193				458.193		3.98	23	10	13	0	<LOD	-0.934831	-0.48395	1.19101	-0.197612	-1.24599	-1.03665	0.552796	0.778384	1.37685
3.98_438.21				438.21		3.98	30	15	15	0	-1.58769	-1.02522	-0.366523	0.493996	-0.626809	-0.688798	0.571251	0.946242	1.56216	0.721387
3.98_422.215				422.215		3.98	30	15	15	0	-0.992437	-0.814241	0.0913385	-0.224145	-0.667881	-0.927131	-0.36178	0.689466	1.25714	1.94967
3.98_422.214				422.214		3.98	29	14	15	0	-0.830246	-0.665297	-0.269212	-0.407751	-0.727178	-0.872798	-0.298958	0.773627	1.32248	1.97534
3.97_532.214				532.214		3.97	30	15	15	0	-0.845366	-0.499006	0.711353	1.73063	1.64821	-0.85621	-0.742221	-0.164828	-0.602571	-0.379994
3.97_516.22				516.22		3.97	24	13	11	0	-0.582954	-0.540446	0.349406	2.27513	0.833906	<LOD	-0.647355	-0.624796	-0.537565	-0.525327
3.97_424.171				424.171		3.97	29	13	12	4	-0.519175	1.81303	1.67807	-0.449896	0.288675	-0.900351	-0.979431	0.120671	-0.572252	-0.479341
3.96_494.233				494.233		3.96	26	13	13	0	-0.532322	-0.283097	1.58437	1.96177	0.303215	-1.0064	-0.374645	-0.774402	-0.592576	-0.285911
3.95_550.212				550.212		3.95	29	15	14	0	-0.648354	-0.317872	1.20656	2.00465	0.947143	-0.818617	-0.682058	-0.521161	-0.497462	-0.672827
3.95_456.22				456.22		3.95	30	15	15	0	-0.338091	0.4217	1.15919	1.5001	1.31128	-0.756849	-0.584661	-0.786762	-0.907342	-1.01857
3.95_410.214		C18H34O10	410.215	410.214	1.2	3.95	30	15	15	0	-0.491183	0.32328	1.88207	1.30648	0.725691	-0.727108	-0.722151	-0.551273	-0.856464	-0.889338
3.94_646.303				646.303		3.94	30	15	15	0	-1.31613	-0.759111	0.364022	1.66241	1.03881	-1.39357	-0.531422	0.0532573	0.664796	0.216947
3.94_600.298				600.298		3.94	26	13	13	0	-1.13187	-0.707683	0.119282	2.09272	0.805362	-1.2236	-0.590467	-0.0765803	0.543458	0.169366
3.94_568.177				568.177		3.94	27	12	15	0	-1.17437	-0.937357	-1.00183	-0.0893502	-0.620883	0.247001	0.614209	1.94774	1.05431	-0.0394684
3.94_554.183				554.183		3.94	28	13	15	0	-1.34426	-0.796982	-0.767193	0.832921	-0.790787	-0.732854	1.28692	0.583884	1.422	0.306353
3.94_552.202				552.202		3.94	33	15	15	3	-1.5894	-0.98445	-0.0320945	1.09138	-0.544541	-0.784553	-0.0367105	0.702708	1.60566	0.571998
3.94_501.21				501.21		3.94	29	14	15	0	-1.15703	-0.92305	-0.352457	0.254743	-0.358716	-0.177368	-0.456012	2.38296	0.756744	0.0301872
3.94_482.236				482.236		3.94	30	15	15	0	-0.391832	0.768706	0.677152	1.61197	1.09049	-1.6845	-0.31155	-0.635191	-0.424408	-0.700843
3.94_476.186				476.186		3.94	29	14	15	0	-1.07094	-0.808163	-1.08226	-0.815966	0.62075	-0.547828	1.05537	0.447814	1.78632	0.414917
3.94_438.21				438.21		3.94	30	15	15	0	-1.56315	-0.746779	-0.295487	0.721569	-0.588695	-0.993418	0.151907	0.927572	1.59718	0.789298
3.93_580.265				580.265		3.93	28	13	15	0	-0.823393	-0.886526	-0.453264	0.334427	-1.08052	-0.99135	0.104746	1.00536	1.67209	1.11843
3.93_580.264				580.264		3.93	28	13	15	0	-0.870689	-1.10324	-0.494217	0.224105	-0.942546	-0.980749	0.566924	0.985525	1.59773	1.01716
3.93_516.222				516.222		3.93	21	12	9	0	<LOD	-0.865221	0.506211	1.44174	1.12075	<LOD	<LOD	-0.901381	-0.661045	-0.641062
3.93_484.216				484.216		3.93	30	15	15	0	-1.49367	-0.908658	-0.413307	0.685189	-0.439832	-0.972948	0.150467	0.97694	1.57382	0.842
3.93_474.187				474.187		3.93	29	14	15	0	-1.24539	-0.973111	-0.260127	0.702247	-0.513495	-1.02227	-0.0186173	1.82439	1.04403	0.462339
3.93_384.218				384.218		3.93	30	15	15	0	-0.425661	-0.0562342	0.906246	1.71878	1.51193	-0.837032	-0.505151	-0.696619	-0.867338	-0.74892
3.93_340.101				340.101		3.93	28	13	15	0	-1.08196	-0.598438	-0.317009	1.50157	-0.686387	-1.31453	-0.193141	0.407887	0.907071	1.37493
3.93_205.955				205.955		3.93	29	5	14	10	<LOD	<LOD	-1.30544	-0.84555	<LOD	-0.930279	0.329929	0.683652	1.06176	1.00593
3.92_432.198				432.198		3.92	30	15	15	0	-0.519149	0.044919	1.08545	1.9988	0.775203	-1.19961	-0.735336	-0.0838916	-0.813159	-0.553227
3.91_558.24				558.24		3.91	30	15	15	0	1.40433	0.145982	1.91923	-0.470342	-0.590671	-0.899121	-0.372681	-0.0572488	0.241217	-1.32069
3.91_392.204				392.204		3.91	30	15	15	0	0.432522	0.326053	1.29173	1.59251	0.671503	-0.845966	-0.833113	-0.477539	-0.872177	-1.28552
3.9_556.23				556.23		3.9	35	15	15	5	1.39271	1.14438	1.16496	-0.0831573	-1.01635	-0.762829	-0.820931	-0.550402	0.683761	-1.15214
3.9_462.206				462.206		3.9	28	15	13	0	0.0220811	0.578927	1.55948	1.11513	0.871747	-0.542296	-0.243781	-0.868274	-1.33003	-1.16298
3.89_528.223				528.223		3.89	21	12	9	0	<LOD	-1.13381	-0.349051	1.96232	0.460856	<LOD	<LOD	-0.574588	0.0745423	-0.440276
3.89_146.094				146.094		3.89	40	15	15	10	-0.311691	0.171224	1.19069	-0.257112	1.1575	-0.429144	1.0834	0.267373	-0.938326	-1.93391
3.88_470.235				470.235		3.88	30	15	15	0	-0.451894	0.236149	1.44505	1.9262	0.486231	-0.796418	-0.540145	-0.745502	-0.720342	-0.839331
3.88_436.23				436.23		3.88	30	15	15	0	-0.205365	0.369602	0.750155	1.4349	1.6701	-0.781452	-0.819557	-0.5616	-0.717759	-1.13903
3.88_424.23				424.23		3.88	29	15	14	0	-0.427784	-0.128423	1.31878	2.17531	0.30089	-0.845251	-0.358646	-0.577127	-0.73715	-0.720604
3.88_289.113				289.113		3.88	24	0	14	10	<LOD	<LOD	<LOD	<LOD	<LOD	-1.1188	-0.698843	-0.260223	1.16824	0.90962
3.87_704.224				704.224		3.87	28	14	14	0	-0.802739	-0.0519513	1.99774	-0.458005	0.123558	-0.940456	-0.0575037	1.49998	-0.920244	-0.390369
3.87_676.161				676.161		3.87	28	14	14	0	-0.795731	0.0630761	1.84219	-0.509916	0.273792	-0.933924	-0.22585	1.6381	-0.914609	-0.43713
3.87_625.163				625.163		3.87	26	14	12	0	-0.688556	-0.048879	1.60571	-0.530999	-0.0303429	-0.777796	-0.3458	2.02992	-0.80814	-0.405113
3.86_712.365				712.365		3.86	30	15	15	0	0.777448	-0.128996	0.37846	0.0802073	-0.648583	-1.48409	-0.758674	-0.246478	-0.190445	2.22115
3.86_468.22				468.22		3.86	30	15	15	0	-0.461085	0.287046	1.51058	1.79245	0.586388	-0.797488	-0.474704	-0.720102	-0.829567	-0.893516
3.86_422.214				422.214		3.86	30	15	15	0	-0.53204	-0.290476	0.195965	0.45322	-0.387036	-0.848059	-0.68885	-0.791019	0.383864	2.50443
3.85_434.121				434.121		3.85	30	15	15	0	1.43442	0.773879	1.40959	0.00263565	0.15597	-0.177916	-0.121755	-0.873931	-1.56076	-1.04214
3.85_368.204				368.204		3.85	30	15	15	0	-0.245603	0.455608	1.47786	1.74393	0.453031	-0.738464	-0.456865	-0.599735	-0.999139	-1.09063
3.84_480.22				480.22		3.84	30	15	15	0	-0.615824	0.13903	1.54506	1.70236	0.826906	-0.880797	-0.722363	-0.621926	-0.63048	-0.741965
3.84_384.142				384.142		3.84	29	14	15	0	-0.502682	0.362346	1.90643	1.53022	0.120116	-0.906765	-0.439841	-0.35336	-0.935184	-0.781285
3.83_698.386				698.386		3.83	30	15	15	0	-0.622131	-0.806396	1.86903	1.24578	-0.129679	-1.43801	-0.131522	0.0871151	-0.671563	0.597369
3.83_424.173				424.173		3.83	30	15	15	0	0.0764231	0.365194	0.940857	-0.96123	2.08838	-1.14195	-0.971742	0.289507	-0.590968	-0.0944715
3.82_746.276				746.276		3.82	30	15	15	0	0.113522	0.455535	1.98152	0.637136	0.61161	-0.936812	-0.517167	0.0722951	-1.22233	-1.19531
3.82_700.272				700.272		3.82	30	15	15	0	0.113946	0.673318	1.92104	0.447542	0.699024	-0.963072	-0.563148	0.074966	-1.11413	-1.28949
3.82_188.105				188.105		3.82	40	15	15	10	-0.0054329	-0.388924	2.77306	-0.0906981	-0.0557907	-0.454064	-0.168752	-0.599937	-0.35741	-0.652054
3.81_504.219				504.219		3.81	30	15	15	0	-1.00906	-0.0650862	1.04532	1.61495	-0.640094	-1.27542	0.15362	1.26467	-0.655203	-0.433698
3.8_704.224				704.224		3.8	28	14	14	0	-0.781789	-0.276514	1.93973	-0.259969	0.444103	-0.938629	-0.514203	1.5449	-0.782237	-0.375397
3.8_658.224				658.224		3.8	30	15	15	0	0.704044	0.378715	1.91898	0.937943	-0.484572	-0.650737	-0.185032	-0.134189	-1.25237	-1.23278
3.8_274.038				274.038		3.8	40	15	15	10	0.646585	0.364548	-1.02647	-0.0368638	2.07675	-0.154321	0.662811	-0.302498	-1.25459	-0.975953
3.79_712.366				712.366		3.79	30	15	15	0	-0.462068	-1.17176	0.952633	0.454278	-0.331303	-1.33139	-0.600201	0.18967	0.320699	1.97944
3.79_336.177				336.177		3.79	30	15	15	0	-0.296374	0.412891	1.825	1.16628	-0.560596	-1.28122	-0.633609	0.79624	-0.854136	-0.574489
3.79_308.009				308.009		3.79	40	15	15	10	0.0617534	0.753414	-0.656742	0.410668	2.08725	-0.658429	0.712577	-1.13694	-0.79034	-0.783212
3.79_262.004				262.004		3.79	40	15	15	10	-1.63621	1.04252	0.785645	0.464018	0.687157	0.860558	-0.424886	-0.460524	0.322982	-1.64126
3.79_258.026				258.026		3.79	40	15	15	10	0.0893483	0.913108	-0.89264	-0.353173	2.11262	-0.0457069	0.695477	-0.507948	-1.06692	-0.944159
3.79_230.031				230.031		3.79	40	15	15	10	-0.613514	0.382405	-0.361525	0.265352	2.31373	-0.00603909	0.613213	-1.30773	-0.713422	-0.572472
3.78_698.387				698.387		3.78	30	15	15	0	-0.322001	-0.440527	0.715627	0.268776	-0.166559	-1.0428	2.43941	-0.135759	-0.947387	-0.36878
3.78_556.23				556.23		3.78	34	15	15	4	0.776641	0.593424	1.49782	1.18295	-0.428701	-0.909328	-0.310859	-1.13926	0.143088	-1.40577
3.78_436.133				436.133		3.78	30	15	15	0	-0.349144	-0.250959	0.998288	-0.0752253	-0.439412	-0.921385	-0.382276	2.4066	-0.909434	-0.0770485
3.78_386.157				386.157		3.78	28	13	15	0	-1.1625	-1.06635	-0.387431	-0.315285	-0.469191	-0.394709	0.518103	-0.0694607	1.5953	1.75152
3.78_334.164				334.164		3.78	30	15	15	0	-0.0942007	1.24672	1.29195	1.23488	0.389485	-0.652245	-0.300442	-0.5744	-1.18381	-1.35795
3.77_610.179				610.179		3.77	40	15	15	10	0.00454734	0.464256	-1.37935	0.186175	2.01069	0.0721906	0.981287	-0.726173	-0.747821	-0.865798
3.77_578.201				578.201		3.77	30	15	15	0	0.885378	0.357579	1.78922	0.594752	-0.27577	-0.972044	-0.833593	0.635021	-1.22582	-0.954724
3.77_430.183				430.183		3.77	30	15	15	0	-0.831681	0.109238	1.56081	1.56024	0.714282	-1.26351	-0.852394	0.00397505	-0.714605	-0.286353
3.77_366.189		C16H30O9	366.189	366.189	-0.02	3.77	30	15	15	0	0.158499	0.608171	1.70381	1.0159	0.849192	-0.803851	-0.764641	-0.605504	-1.16783	-0.993752
3.77_2124.1				2124.1		3.77	40	15	15	10	0.139271	0.64646	-0.407439	0.472055	2.2452	-0.628962	0.33649	-0.882041	-0.982003	-0.939033
3.76_98.067				98.067		3.76	40	15	15	10	-0.156892	0.434028	-0.525505	1.12819	2.01914	-0.489216	0.441112	-0.88678	-0.904617	-1.05946
3.76_678.245				678.245		3.76	27	13	14	0	-0.765828	-0.442198	0.621636	1.9362	1.52231	-0.804311	-0.668227	-0.572955	-0.444008	-0.382613
3.76_644.127				644.127		3.76	40	15	15	10	-0.0480716	0.330952	-1.15164	1.46495	1.68719	0.0488492	0.360724	-0.808117	-0.88185	-1.00299
3.76_628.153				628.153		3.76	40	15	15	10	-0.0659362	0.457751	-1.32704	1.1491	1.61289	0.26563	0.679026	-0.934636	-0.993056	-0.843734
3.76_548.076				548.076		3.76	40	15	15	10	-0.0706717	0.441622	-1.02092	0.697514	2.02062	-0.217212	0.8364	-0.931324	-1.00513	-0.750903
3.76_536.192				536.192		3.76	25	13	12	0	-0.801966	-0.408255	0.79733	1.87788	1.47603	-0.824417	-0.707145	-0.52471	-0.480508	-0.404241
3.76_532.101				532.101		3.76	40	15	15	10	0.0230301	0.142705	-1.18878	0.764979	2.14679	0.0385759	0.535988	-0.978704	-0.634176	-0.850412
3.76_488.083				488.083		3.76	40	15	15	10	-0.313881	0.708492	-0.646981	1.12149	1.9877	-0.167226	0.14487	-0.78296	-0.971125	-1.08037
3.76_482.09				482.09		3.76	40	15	15	10	-0.403802	0.249819	1.13271	1.55166	1.34755	-0.596681	-0.473279	-0.764347	-0.933773	-1.10986
3.76_480.09				480.09		3.76	40	15	15	10	-0.365884	0.591743	-0.204586	1.57074	1.72129	-0.683525	0.0540907	-0.575088	-0.955103	-1.15368
3.76_472.11				472.11		3.76	40	15	15	10	0.0166104	-0.0234332	-0.890335	1.53429	1.57106	-0.548935	0.33651	0.348883	-1.39508	-0.949565
3.76_470.124				470.124		3.76	40	15	15	10	-1.47792	-0.122234	0.780145	0.14765	0.480553	-1.08101	0.404511	1.97491	-0.770861	-0.33574
3.76_464.116				464.116		3.76	40	15	15	10	-0.0829092	0.348726	-1.09644	1.68242	1.52702	-0.14008	0.400049	-0.815995	-0.921745	-0.901041
3.76_436.053				436.053		3.76	40	15	15	10	0.0380775	0.808717	-1.63239	0.299571	1.50849	0.17865	1.10376	-1.21056	-0.539427	-0.554894
3.76_368.066				368.066		3.76	40	15	15	10	-0.0755127	0.498295	-0.938701	0.735249	2.11697	-0.320517	0.63178	-0.934854	-0.847211	-0.8655
3.76_352.088				352.088		3.76	40	15	15	10	-0.156241	0.624676	-0.318421	1.28647	1.82525	-0.466159	0.287627	-0.957823	-1.16603	-0.959346
3.76_346.032				346.032		3.76	40	15	15	10	-0.230107	0.576759	-0.840324	0.542007	2.17076	-0.262743	0.691793	-0.80993	-0.85149	-0.986729
3.76_342.027				342.027		3.76	40	15	15	10	-0.248231	0.623288	-0.681277	1.11139	2.05208	-0.116178	0.0619389	-0.905339	-0.980411	-0.917258
3.76_340.032				340.032		3.76	40	15	15	10	-0.197249	0.242694	-0.28682	1.63048	1.72393	-0.582256	0.275676	-0.639144	-0.990424	-1.17689
3.76_338.032				338.032		3.76	40	15	15	10	-0.241848	0.431268	-0.694685	1.3185	1.93193	-0.283722	0.331661	-0.858893	-0.926231	-1.00798
3.76_328.066				328.066		3.76	40	15	15	10	-0.0935332	0.702286	-1.05856	0.468028	1.82771	-0.10651	1.07286	-1.05009	-0.891189	-0.871
3.76_324.021				324.021		3.76	40	15	15	10	0.289999	0.923031	-0.857988	-0.0943742	1.89699	0.401619	0.49719	-0.664743	-1.26569	-1.12603
3.76_322.069				322.069		3.76	40	15	15	10	0.070373	0.449567	-1.48007	0.405743	1.65542	0.201525	1.21583	-1.02497	-0.666993	-0.826424
3.76_308.072				308.072		3.76	40	15	15	10	-0.171059	0.471686	-0.601747	1.05806	2.03586	-0.42267	0.476996	-0.874941	-0.933638	-1.03854
3.76_306.096				306.096		3.76	40	15	15	10	0.0893817	0.550221	-1.38524	0.0868217	1.81153	0.271521	1.09588	-1.07775	-0.67242	-0.769951
3.76_291.11				291.11		3.76	40	15	15	10	-0.0818537	0.65975	-0.569648	0.605344	2.23595	-0.503963	0.367787	-0.82219	-0.861583	-1.02959
3.76_282.985				282.985		3.76	40	15	15	10	-0.101769	0.701761	-0.616975	0.840719	1.92651	-0.51659	0.702609	-1.17243	-0.943535	-0.820304
3.76_241.98				241.98		3.76	40	15	15	10	0.0364367	0.644059	-0.89602	0.523809	2.06458	-0.210293	0.681386	-1.06213	-0.790711	-0.991108
3.76_197.991				197.991		3.76	40	15	15	10	0.0268545	0.506065	-0.833835	0.425087	2.06719	-0.217471	0.890464	-1.06518	-0.916409	-0.882772
3.76_157.045				157.045		3.76	40	15	15	10	-0.377746	0.455532	-0.732687	1.10133	1.99801	-0.26451	0.544127	-0.885644	-0.735211	-1.1032
3.76_144.062				144.062		3.76	40	15	15	10	-0.195525	0.439794	-0.498331	1.15621	1.96633	-0.450384	0.503339	-0.887977	-0.969001	-1.06446
3.76_1063.059				1063.06		3.76	40	15	15	10	-0.202711	0.511051	-0.267288	0.938462	2.08156	-0.508286	0.42226	-0.936198	-0.916752	-1.1221
3.76_100.072				100.072		3.76	40	15	15	10	-0.296239	0.49106	-0.44054	1.02938	2.06877	-0.657138	0.505107	-0.860867	-0.82595	-1.01358
3.75_556.179				556.179		3.75	28	15	13	0	-0.798175	-0.452108	0.851978	1.03643	2.1241	-0.796318	-0.745626	-0.57372	-0.566594	-0.0799654
3.75_404.059				404.059		3.75	40	15	15	10	-0.0250217	0.711025	-0.640877	0.323143	2.2388	-0.299841	0.498667	-0.912041	-0.910143	-0.983711
3.75_360.013				360.013		3.75	40	15	15	10	0.341475	0.513929	-1.57407	0.347775	1.76375	0.333917	0.80235	-0.929542	-0.725111	-0.874477
3.75_350.023				350.023		3.75	40	15	15	10	0.0738916	0.518954	-0.492497	0.6976	2.07292	-0.0876125	0.448617	-1.12179	-1.00292	-1.10717
3.75_348.031				348.031		3.75	40	15	15	10	-0.226484	0.523273	-0.754952	0.525469	2.19748	-0.125808	0.636172	-1.01432	-0.868537	-0.892292
3.75_286.979				286.979		3.75	40	15	15	10	0.342596	0.587152	-0.976547	0.142656	2.04464	0.0884308	0.679821	-1.12455	-0.723148	-1.06105
3.75_278.032				278.032		3.75	40	15	15	10	0.115604	0.634293	-1.28003	-0.129473	1.95057	0.206611	0.950304	-1.15011	-0.566064	-0.731711
3.75_272.015				272.015		3.75	40	15	15	10	0.165881	0.838378	-0.721703	-0.205781	1.97353	-0.0373981	0.929233	-1.18283	-0.883947	-0.875366
3.75_241.952				241.952		3.75	40	15	15	10	-0.105605	0.768497	-0.807575	0.25957	2.11962	-0.175562	0.723961	-1.09545	-0.7837	-0.903756
3.75_239.954				239.954		3.75	40	15	15	10	-0.121392	0.835496	-0.714511	0.250119	2.16169	-0.197681	0.578106	-1.07497	-0.719499	-0.997354
3.75_226.01				226.01		3.75	40	15	15	10	0.200382	0.657955	-0.48069	-0.632644	2.26919	-0.240817	0.744166	-0.951643	-0.744194	-0.821703
3.75_210.042				210.042		3.75	40	15	15	10	0.0717867	0.969494	-1.09054	-0.182381	1.84767	0.0822332	0.990384	-0.911942	-0.990542	-0.786165
3.75_197.961				197.961		3.75	40	15	15	10	0.233199	0.688611	-0.548925	0.493134	2.19383	-0.495132	0.304377	-1.10225	-0.8976	-0.869244
3.75_195.965				195.965		3.75	40	15	15	10	0.0196704	0.807168	-0.720076	0.248058	2.16338	-0.354413	0.598607	-0.856389	-0.78856	-1.11744
3.74_552.27				552.27		3.74	30	15	15	0	-0.433282	0.159833	1.05691	2.13164	0.682871	-0.723101	-0.522785	-0.672515	-0.823943	-0.855633
3.74_402.152				402.152		3.74	28	13	15	0	-0.94787	0.2612	1.06667	1.52549	-0.251799	-1.40374	-0.908935	-0.327451	-0.253311	1.23974
3.74_338.156				338.156		3.74	15	0	15	0	<LOD	<LOD	<LOD	<LOD	<LOD	-1.21863	-0.842627	0.231667	1.1117	0.717896
3.74_258.026				258.026		3.74	40	15	15	10	0.0825933	1.1567	-1.10149	-1.06829	1.89675	-0.110827	0.544704	-0.00868762	-0.234248	-1.15721
3.74_230.035				230.035		3.74	40	15	15	10	0.326351	0.767255	-0.562512	-0.388446	2.04727	-0.260507	0.831052	-1.25302	-0.452517	-1.05492
3.73_336.178				336.178		3.73	30	15	15	0	0.633465	0.412788	2.00828	1.06507	-0.688461	-0.701946	-0.220409	-0.524985	-0.959137	-1.02466
3.73_310.162				310.162		3.73	15	15	0	0	-0.874477	-1.21543	0.645358	1.10839	0.336152	<LOD	<LOD	<LOD	<LOD	<LOD
3.73_308.01				308.01		3.73	40	15	15	10	-0.286918	0.446164	-0.292823	-0.440471	2.21749	0.418423	0.779206	-1.01292	-1.05946	-0.768693
3.73_274.038				274.038		3.73	40	15	15	10	0.255891	0.607938	-0.271595	-0.941009	2.27825	0.0287186	0.543253	-0.719845	-0.80701	-0.974596
3.73_230.031				230.031		3.73	40	15	15	10	0.0230165	0.672075	-0.495811	-0.529789	2.06444	-0.108157	0.975563	-1.22696	-0.271221	-1.10315
3.73_208.073				208.073		3.73	30	15	15	0	0.114154	0.476092	2.16743	0.745954	0.120386	-0.831418	-0.454313	-0.062887	-1.11246	-1.16293
3.73_166.063				166.063		3.73	30	15	15	0	0.161993	0.88821	1.77052	0.802142	0.432308	-0.805025	-0.459802	-0.216859	-1.25607	-1.31741
3.72_468.223				468.223		3.72	30	15	15	0	-0.496383	0.266021	1.21851	1.93315	0.71691	-0.933932	-0.251601	-0.865419	-0.755856	-0.831403
3.72_416.203				416.203		3.72	30	15	15	0	-0.705286	0.370751	0.407342	2.32493	0.417436	-1.1467	-0.86307	0.168487	-0.656048	-0.317837
3.72_348.178				348.178		3.72	30	15	15	0	-0.0277082	-0.366033	2.30995	1.07517	-0.255925	-0.978034	-0.00625464	-0.168929	-0.602672	-0.979567
3.72_132.079				132.079		3.72	30	15	15	0	0.0121092	0.793621	1.90657	0.303745	0.641841	-0.983352	-0.501862	0.245754	-1.32568	-1.09275
3.71_518.199				518.199		3.71	25	12	13	0	-0.421909	-0.174923	0.156402	<LOD	1.78217	-1.36824	-0.376662	1.4208	-0.36677	-0.65088
3.71_482.199				482.199		3.71	28	13	15	0	-0.910495	-1.09043	-0.577975	0.160247	-0.713126	-0.976567	0.306399	1.15614	1.66151	0.984296
3.71_366.188		C16H30O9	366.189	366.188	0.98	3.71	30	15	15	0	0.889355	0.215005	1.07052	1.38419	0.917295	-0.995571	-0.757721	-0.954964	-1.21501	-0.553093
3.71_284.089				284.089		3.71	28	11	13	4	-0.434754	-0.336318	-0.0479303	<LOD	2.44755	-0.964572	-0.126981	0.475684	-0.605088	-0.407593
3.7_576.166				576.166		3.7	30	15	15	0	-0.469146	0.486299	1.09168	1.44544	1.41341	-0.832031	-0.503248	-0.806171	-0.884808	-0.941428
3.7_555.138				555.138		3.7	30	15	15	0	-0.340572	0.498184	0.992433	1.52441	1.29529	-0.713827	-0.222649	-0.921019	-0.981731	-1.13053
3.7_526.185				526.185		3.7	26	15	11	0	-0.479709	0.423511	1.13398	1.74086	1.0767	-0.791006	-0.54508	-0.780508	-0.869544	-0.9092
3.7_524.208				524.208		3.7	30	15	15	0	-0.458987	0.390712	1.1416	1.69802	1.13744	-0.819934	-0.522649	-0.771973	-0.845201	-0.949022
3.7_510.139				510.139		3.7	30	15	15	0	-0.187327	0.223099	0.743199	1.53593	1.6603	-0.962755	-0.626166	-0.656937	-0.889903	-0.839435
3.7_498.189				498.189		3.7	30	15	15	0	-0.41726	0.381609	1.03433	1.68759	1.22751	-0.722623	-0.452728	-0.774062	-0.981411	-0.982953
3.7_473.209				473.209		3.7	30	15	15	0	-0.406739	0.309086	1.4908	1.68519	0.776818	-0.847635	-0.596555	-0.608816	-0.854522	-0.947628
3.7_456.221				456.221		3.7	34	15	15	4	-0.46459	0.239423	1.15726	1.96107	0.832182	-0.738327	-0.53077	-0.738181	-0.830512	-0.887556
3.7_446.191				446.191		3.7	30	15	15	0	-0.477698	0.261106	1.40123	1.80185	0.767742	-0.822442	-0.55231	-0.642969	-0.840876	-0.895633
3.7_410.215		C18H34O10	410.215	410.215	0.2	3.7	30	15	15	0	-0.438692	0.245128	1.20341	1.91128	0.851807	-0.775969	-0.536827	-0.7325	-0.836719	-0.890918
3.7_404.113				404.113		3.7	30	15	15	0	-1.03508	-0.0472376	1.74799	1.06998	0.32612	-1.48189	-0.769477	0.802346	-0.298804	-0.313945
3.7_394.183				394.183		3.7	29	14	15	0	-0.520164	-0.17981	0.877721	2.02999	1.12987	-0.833616	-0.796973	-0.907041	-0.568004	-0.231973
3.69_490.204				490.204		3.69	30	15	15	0	0.0735796	0.763723	1.19404	1.20347	-0.376307	-0.60614	-0.375463	0.946505	-1.46453	-1.35887
3.69_480.175				480.175		3.69	30	15	15	0	-0.175268	0.654848	1.12457	1.57017	0.885078	-0.922552	-0.597393	-0.1785	-1.17301	-1.18794
3.69_452.078				452.078		3.69	26	15	11	0	0.440574	0.202001	1.72334	0.632894	-0.367573	-0.505696	-0.125646	0.892687	-1.38456	-1.50802
3.69_340.152				340.152		3.69	15	0	15	0	<LOD	<LOD	<LOD	<LOD	<LOD	-1.65926	-0.143308	0.465128	0.428328	0.909117
3.68_714.38				714.38		3.68	30	15	15	0	-0.795758	-1.001	1.05581	1.25477	-0.776625	-1.00382	-0.818789	1.4288	0.0662689	0.590342
3.68_502.204				502.204		3.68	25	12	13	0	<LOD	-0.503689	0.308953	2.03688	1.2554	-0.672882	-0.640744	-0.620578	-0.561441	-0.601897
3.68_484.116				484.116		3.68	15	0	15	0	<LOD	<LOD	<LOD	<LOD	<LOD	-1.51983	-0.525441	0.795902	0.63232	0.617047
3.68_482.141				482.141		3.68	27	12	15	0	-0.795823	-0.718866	-0.575692	-0.731657	-0.465794	-0.771069	-0.131203	1.83873	1.10852	1.24286
3.68_478.111				478.111		3.68	30	15	15	0	1.6299	-0.0967913	1.53876	0.600139	-0.472193	-0.57992	0.275741	-0.659934	-0.983422	-1.25227
3.68_470.199				470.199		3.68	30	15	15	0	-1.46316	-0.937882	1.25051	1.61471	-0.249447	-1.09192	-0.155456	0.553497	0.472634	0.00651053
3.68_444.197				444.197		3.68	30	15	15	0	-0.247516	0.501278	1.23155	0.339392	0.984452	-0.731024	-0.466115	1.18865	-1.40317	-1.39749
3.68_414.152		C19H26O10	414.153	414.152	0.6	3.68	18	3	15	0	<LOD	<LOD	-1.03169	-1.02728	<LOD	-0.814314	-0.177217	1.24241	0.842253	0.965835
3.68_333.994				333.994		3.68	36	15	15	6	-0.431046	0.166351	-0.703364	-1.47934	0.999247	1.39115	1.50449	-0.560156	-0.128518	-0.75881
3.68_282.017				282.017		3.68	40	15	15	10	0.877786	0.574527	-1.33819	-1.1373	1.05216	0.796198	1.14567	-1.14511	-0.178898	-0.646856
3.68_206.094				206.094		3.68	15	0	15	0	<LOD	<LOD	<LOD	<LOD	<LOD	-1.42196	-0.661113	0.941623	0.53286	0.608587
3.68_162.104				162.104		3.68	15	0	15	0	<LOD	<LOD	<LOD	<LOD	<LOD	-1.4248	-0.654002	0.953262	0.569573	0.555968
3.67_748.29				748.29		3.67	30	15	15	0	0.88223	0.572653	1.2363	0.325289	0.689063	-1.12003	0.343666	0.0381164	-1.41942	-1.54787
3.67_505.12				505.12		3.67	30	15	15	0	-0.59638	0.504257	0.775512	0.980983	1.92383	-1.06902	-0.639881	-0.911925	-0.853444	-0.113935
3.67_448.101				448.101		3.67	30	15	15	0	0.730323	0.161174	2.04666	0.345632	0.595573	-0.929627	-0.102792	-1.23204	-0.606223	-1.00868
3.67_437.132				437.132		3.67	30	15	15	0	-0.730966	0.312336	0.999417	1.37117	1.53864	-1.10921	-0.747741	-0.829498	-0.802648	-0.00149951
3.66_434.12				434.12		3.66	30	15	15	0	0.0853579	0.680106	1.25892	0.86825	0.946887	-0.596087	0.338436	-0.595117	-1.56582	-1.42093
3.66_394.184				394.184		3.66	30	15	15	0	-0.231108	-0.654439	1.20284	0.0569816	-0.238583	-1.03664	-1.0518	-0.00212965	-0.230787	2.18567
3.66_262.141				262.141		3.66	40	15	15	10	-0.359089	-0.397724	2.80718	0.0772516	-0.228238	-0.417566	-0.20503	-0.479474	-0.32664	-0.470677
3.65_554.145				554.145		3.65	30	15	15	0	0.395341	-0.293573	1.3732	0.104667	1.38011	-1.30817	-0.675176	0.537415	-1.57982	0.0660009
3.65_551.876				551.876		3.65	28	13	15	0	-0.507326	-0.685079	-0.663194	-0.571182	-0.434073	-0.482018	-0.227391	0.183372	0.897956	2.48893
3.65_508.121				508.121		3.65	30	15	15	0	0.591007	0.704567	1.6976	0.743384	0.373203	-0.625272	-0.204834	-0.735061	-0.842296	-1.7023
3.65_412.214				412.214		3.65	30	15	15	0	-1.05453	-0.951757	-0.84587	-0.742265	-0.866884	0.287606	0.543907	1.47726	1.28441	0.868121
3.65_410.138				410.138		3.65	25	14	11	0	-0.563906	-0.00411515	1.06875	1.87742	1.17802	-0.973344	-0.617436	-0.627064	-0.739697	-0.598625
3.65_400.211				400.211		3.65	30	15	15	0	-0.71721	0.361904	1.14628	1.57559	1.32106	-0.8946	-0.582478	-0.564492	-0.818538	-0.827508
3.65_359.122				359.122		3.65	30	15	15	0	-0.695592	0.703224	1.1094	1.781	0.672383	-0.963732	-0.050842	-0.676022	-1.01602	-0.863794
3.65_132.079				132.079		3.65	30	15	15	0	0.586618	-0.118714	2.3724	0.350317	0.206069	-0.978314	-0.579553	-0.0957277	-0.987689	-0.755408
3.64_546.27				546.27		3.64	30	15	15	0	-0.530994	0.152931	1.18806	1.80749	1.09235	-0.842437	-0.540896	-0.674451	-0.802441	-0.849616
3.64_482.089				482.089		3.64	40	15	15	10	0.421843	0.243236	2.0004	0.957251	0.207818	-0.737982	-0.325003	-0.291001	-1.24755	-1.22901
3.64_448.183				448.183		3.64	30	15	15	0	-0.572877	0.416205	2.15593	-0.624148	1.24321	-1.04965	-0.737572	-0.167456	-0.228423	-0.435225
3.64_432.105				432.105		3.64	30	15	15	0	-0.576715	0.192007	2.00463	0.52364	0.168107	-1.1052	-0.361362	1.06456	-0.934817	-0.974848
3.64_354.188				354.188		3.64	26	15	11	0	-0.353267	0.457687	1.42652	1.29819	0.718682	-0.979799	-0.491706	-0.848872	-1.22744	<LOD
3.64_348.178				348.178		3.64	33	15	15	3	-0.477437	-0.0996688	2.32828	0.942177	0.356285	-0.998246	-0.174614	-0.403188	-0.576579	-0.897006
3.64_174.089				174.089		3.64	33	15	15	3	-0.457501	-0.117799	2.29324	0.866355	0.590331	-1.00363	-0.358948	-0.296254	-0.606091	-0.909704
3.63_562.259				562.259		3.63	30	15	15	0	-1.18564	-0.511845	0.905819	2.14525	0.26758	-0.638785	0.624227	-0.200357	-0.627449	-0.778795
3.63_526.201				526.201		3.63	15	0	15	0	<LOD	<LOD	<LOD	<LOD	<LOD	-1.21541	-0.799846	0.915303	1.01918	0.0807663
3.63_490.203				490.203		3.63	30	15	15	0	1.07555	2.49205	-0.434204	-0.328613	-0.479254	-0.329614	-0.522799	-0.520011	-0.483084	-0.470023
3.63_458.218				458.218		3.63	30	15	15	0	-0.89841	-0.859108	-1.18248	-1.12478	0.238363	-0.00269752	0.169105	1.18444	1.58338	0.89218
3.63_434.214				434.214		3.63	30	15	15	0	0.0199537	0.628196	1.26755	1.42536	1.01753	-1.00566	-0.860218	-0.671442	-0.722768	-1.0985
3.63_250.158				250.158		3.63	15	0	15	0	<LOD	<LOD	<LOD	<LOD	<LOD	-1.09616	-0.993936	0.783725	1.06731	0.239062
3.62_540.167				540.167		3.62	30	15	15	0	-0.576949	-0.446095	0.725274	-0.0627743	2.42215	-0.939371	-0.335573	0.131867	-1.02367	0.105148
3.62_504.184				504.184		3.62	30	15	15	0	1.48826	-0.245073	1.52164	0.802199	-0.76689	-0.659156	-0.15816	0.307767	-1.13183	-1.15876
3.62_466.204				466.204		3.62	30	15	15	0	-0.25292	0.282594	1.70963	1.56949	0.58918	-0.764022	-0.80396	-0.566371	-0.789968	-0.973652
3.62_416.203				416.203		3.62	30	15	15	0	-0.698832	0.622979	1.41601	1.62776	0.695119	-1.07603	-0.738053	-0.307008	-0.774206	-0.767742
3.61_410.066				410.066		3.61	30	15	15	0	1.18208	0.135323	1.50298	0.722748	0.648375	-0.550798	-0.415557	-0.539725	-1.27345	-1.41197
3.61_406.182				406.182		3.61	30	15	15	0	-0.584941	-0.24758	0.0707248	2.60797	0.584841	-0.82364	-0.516958	-0.331585	-0.15083	-0.608003
3.61_342.076				342.076		3.61	30	15	15	0	1.35893	0.0875159	2.0595	0.200767	-0.205305	-0.68126	-0.771161	-0.202699	-0.829975	-1.01632
3.61_164.014				164.014		3.61	30	15	15	0	1.41298	0.0856333	2.01105	0.133319	-0.0630409	-0.662175	-0.677061	-0.261336	-0.935246	-1.04413
3.61_103.993				103.993		3.61	30	15	15	0	1.19888	0.136991	2.22385	-0.0301732	-0.0020192	-0.758326	-0.685082	-0.441891	-0.752625	-0.889602
3.6_508.18				508.18		3.6	30	15	15	0	-0.94839	0.508288	1.43515	-0.465975	1.70378	-1.15353	-1.07461	0.332764	-0.237485	-0.0999852
3.6_508.121				508.121		3.6	30	15	15	0	1.08738	-1.21625	0.850373	0.593356	-1.18945	-1.28343	1.43033	-0.0163048	-0.375283	0.11928
3.6_478.24				478.24		3.6	30	15	15	0	-0.601398	0.110668	0.664841	0.371902	2.20359	-1.03731	-0.895825	0.380661	-0.124247	-1.07288
3.6_456.219				456.219		3.6	34	15	15	4	-0.416965	0.390797	1.56281	1.90026	0.0856973	-0.762428	-0.432048	-0.869052	-0.841467	-0.617604
3.6_438.099				438.099		3.6	26	14	12	0	0.703088	0.201154	1.84825	1.11525	-0.0198079	-0.698723	-0.15057	-0.558641	-1.27131	-1.16869
3.6_320.22				320.22		3.6	25	15	10	0	-0.229422	0.372002	0.947861	1.54892	1.44147	-0.720561	-0.600797	-0.819305	-0.96881	-0.971356
3.59_470.197				470.197		3.59	30	15	15	0	-1.16591	-0.744	0.154395	-0.249125	-1.24499	-0.788977	0.360152	1.29869	1.49055	0.889209
3.59_425.188				425.188		3.59	18	3	15	0	-0.849437	-1.00893	-0.800163	<LOD	<LOD	-0.548091	-0.296528	0.867126	1.37145	1.26457
3.59_398.167				398.167		3.59	30	15	15	0	0.729376	-0.0194043	2.21896	0.712157	-0.589626	-0.536496	-0.584024	0.094362	-1.00031	-1.02499
3.59_392.11				392.11		3.59	33	15	15	3	-0.0748615	1.04313	2.03706	0.885713	-0.372698	-0.836338	-0.446046	-0.359529	-1.08834	-0.78809
3.58_498.23				498.23		3.58	30	15	15	0	-0.463922	0.222591	1.03865	2.2164	0.298877	-0.861928	-0.430523	-0.180177	-0.895652	-0.944319
3.58_476.188				476.188		3.58	30	15	15	0	0.436805	0.659814	1.30304	1.75192	-0.348677	-0.658866	-0.615137	-0.249679	-1.05933	-1.21988
3.58_452.224				452.224		3.58	30	15	15	0	-1.10027	-0.298739	1.80693	1.07607	0.930167	-1.32923	-0.661459	-0.33842	0.169025	-0.254071
3.58_434.085				434.085		3.58	39	15	15	9	0.838389	0.494287	1.79281	0.962124	-0.565897	-0.732184	-0.00996398	-0.367841	-1.28645	-1.12527
3.58_408.199				408.199		3.58	30	15	15	0	0.617143	0.202049	1.79792	1.21371	-0.539135	-0.610662	-0.643187	0.285263	-1.07307	-1.25003
3.58_394.183				394.183		3.58	29	14	15	0	-1.46969	-1.1429	0.26048	1.15628	0.104659	-1.3701	-0.079255	1.08226	0.728777	0.729488
3.58_354.129				354.129		3.58	26	13	13	0	1.12243	0.616341	1.87613	0.621212	-0.870351	-0.557955	-0.403385	-0.388474	-1.14941	-0.866542
3.58_208.072				208.072		3.58	30	15	15	0	1.01762	-0.599186	-0.0192752	-0.688623	1.95108	0.771209	-0.119545	-0.0171138	-0.949841	-1.34633
3.57_510.191				510.191		3.57	28	15	13	0	-0.0489495	-0.337911	1.16103	1.35799	1.60735	-0.761444	-0.632002	-0.361458	-0.872951	-1.11166
3.57_494.125				494.125		3.57	30	15	15	0	0.343198	0.665047	1.94614	0.556132	0.481641	-0.693303	-0.212645	-0.50732	-1.32553	-1.25336
3.57_494.123				494.123		3.57	30	15	15	0	0.43905	0.731284	1.90006	0.662448	0.314771	-0.963136	-0.173069	-0.494603	-1.18008	-1.23673
3.57_442.205				442.205		3.57	30	15	15	0	-0.303009	0.34861	0.876666	1.3007	1.73289	-0.739796	-0.48629	-0.800198	-0.827495	-1.10207
3.57_406.184				406.184		3.57	30	15	15	0	-0.705068	-0.319945	-0.0709857	2.40941	1.03883	-1.00205	-0.210283	-0.510508	-0.269628	-0.359759
3.57_396.198				396.198		3.57	30	15	15	0	-0.267887	-0.0662319	1.39016	1.28535	1.46672	-0.731425	-0.363416	-0.713036	-0.922879	-1.07736
3.57_145.053				145.053		3.57	40	15	15	10	-0.812381	-0.821757	-0.884921	-0.947597	-0.357068	-0.396467	1.24767	0.790352	1.845	0.337168
3.56_634.185				634.185		3.56	30	15	15	0	0.108644	0.524128	0.639624	0.0304675	2.14635	-0.637744	0.271845	-0.986453	-1.19757	-0.899297
3.56_566.2				566.2		3.56	30	15	15	0	0.0101412	1.17602	0.907911	0.991062	1.23946	-0.843338	-0.28108	-0.940769	-0.977485	-1.28193
3.56_562.261				562.261		3.56	30	15	15	0	-0.94267	0.0616393	1.29368	1.89625	0.696305	-1.12519	-0.464097	-0.188291	-0.410125	-0.817498
3.56_416.168				416.168		3.56	14	0	14	0	<LOD	<LOD	<LOD	<LOD	<LOD	-1.56288	-0.3771	0.972797	0.507491	0.459692
3.56_374.147				374.147		3.56	29	15	14	0	-0.708912	-0.0907813	0.8627	1.598	0.28189	-1.12869	-0.903909	1.41406	-0.93083	-0.393531
3.56_340.132				340.132		3.56	30	15	15	0	-0.466242	0.587925	1.24691	0.853208	1.59701	-1.02202	-0.18471	-0.557609	-1.25506	-0.799408
3.55_718.281				718.281		3.55	30	15	15	0	0.720841	0.950709	1.45855	0.763401	0.0838742	-0.866006	-0.570038	0.146762	-1.07022	-1.61788
3.55_716.266				716.266		3.55	30	15	15	0	0.47711	0.884098	1.7219	0.20812	0.556401	-0.854423	-0.232108	0.0258987	-1.34536	-1.44164
3.55_520.194				520.194		3.55	30	15	15	0	-0.407477	0.358808	-0.32302	0.228837	1.61289	-1.45897	-0.0615805	-0.917991	-0.63446	1.60296
3.55_386.157				386.157		3.55	15	0	15	0	<LOD	<LOD	<LOD	<LOD	<LOD	-1.48701	-0.155823	0.444102	-0.0520969	1.25083
3.55_334.198				334.198		3.55	30	15	15	0	-0.371462	0.461679	0.95476	1.80725	1.12474	-0.81581	-0.620724	-0.798764	-0.887133	-0.854538
3.54_428.111				428.111		3.54	29	15	14	0	0.00302835	0.311505	2.35293	-0.530355	0.21002	-1.32739	-0.28753	0.499147	-0.923407	-0.307945
3.54_366.189		C16H30O9	366.189	366.189	-0.02	3.54	19	11	8	0	0.118338	-0.574749	1.60129	2.01478	-0.0866522	-0.897966	-0.424394	-0.478698	-0.627343	-0.644606
3.54_220.037				220.037		3.54	21	3	9	9	<LOD	<LOD	-1.02062	<LOD	-0.236165	<LOD	<LOD	-0.241235	1.677	-0.178981
3.53_456.22				456.22		3.53	24	15	9	0	-0.794498	0.0662204	0.93635	2.35783	0.217239	-1.00492	-0.459825	-0.647649	-0.247698	-0.423053
3.53_368.204				368.204		3.53	30	15	15	0	-0.470827	0.614914	0.868128	2.08404	0.637393	-0.717346	-0.517943	-0.696309	-0.84772	-0.954329
3.53_340.172				340.172		3.53	30	15	15	0	-0.363229	0.710312	1.49902	1.31068	0.955889	-0.660036	-0.690302	-0.838092	-1.05942	-0.864828
3.52_580.21				580.21		3.52	30	15	15	0	0.545821	-0.112727	1.17442	1.74276	0.126583	-0.939521	0.170464	-0.139345	-1.4009	-1.16755
3.52_566.199				566.199		3.52	30	15	15	0	0.0782867	0.496023	1.73372	0.520992	1.28154	-1.38564	-0.54648	-0.590777	-0.781829	-0.805838
3.52_486.232				486.232		3.52	30	15	15	0	-0.385149	0.364251	1.45952	1.83266	0.440385	-0.85571	-0.402914	-0.53078	-0.882647	-1.03962
3.52_476.189				476.189		3.52	30	15	15	0	0.0623807	0.500539	1.66742	1.72021	-0.148285	-0.901097	-0.674776	-0.627466	-0.649678	-0.949249
3.52_440.224				440.224		3.52	30	15	15	0	-0.701859	0.520051	1.16906	1.92312	0.540298	-0.928053	-0.263392	-0.378896	-0.802549	-1.07778
3.52_408.199				408.199		3.52	30	15	15	0	0.683235	0.308383	1.63584	1.40613	-0.432257	-0.640769	-0.669264	0.048246	-1.1543	-1.18525
3.52_362.158				362.158		3.52	30	15	15	0	0.0109886	-0.537542	1.95606	0.379326	1.12639	-1.11111	-0.771481	0.507342	-1.07	-0.48997
3.52_172.073				172.073		3.52	40	15	15	10	-0.365659	-0.340485	2.33553	1.19146	0.119559	-0.610326	-0.38147	-0.522572	-0.548865	-0.877173
3.52_128.084				128.084		3.52	40	15	15	10	-0.409772	-0.429355	2.4083	1.02435	0.248217	-0.74345	-0.458359	-0.494566	-0.380902	-0.764468
3.51_712.256				712.256		3.51	30	15	15	0	-1.21057	0.244353	1.34537	1.42766	1.10943	-0.979508	0.0740085	-0.517742	-0.901799	-0.591202
3.51_666.243				666.243		3.51	28	13	15	0	-0.80864	0.0913428	1.63597	1.2767	0.97903	-1.11053	0.239931	-0.676061	-0.802663	-0.825071
3.51_555.211				555.211		3.51	23	11	7	5	0.773506	-0.0342605	1.3768	0.354101	1.14432	-1.21049	-0.779774	-0.229995	<LOD	-1.39422
3.51_520.193				520.193		3.51	30	15	15	0	-0.433548	0.106701	0.837949	0.777622	1.58623	-1.21515	-0.159356	-0.993197	-1.34004	0.832796
3.51_488.188				488.188		3.51	30	15	15	0	0.193877	0.586241	1.01663	1.83409	0.617686	-1.03869	-0.536462	-0.809282	-0.731107	-1.13298
3.51_398.161				398.161		3.51	30	15	15	0	0.695518	-0.321632	2.04669	0.94545	-0.0578727	-0.926232	-0.121229	-0.0464026	-1.12026	-1.09403
3.51_336.178				336.178		3.51	30	15	15	0	-1.11885	-0.321706	-0.435855	0.580019	-0.27219	-0.669625	-0.296134	-0.727392	1.05659	2.20514
3.51_308.09				308.09		3.51	30	15	15	0	-0.198707	0.532028	0.391384	2.17201	-0.596761	-0.47733	0.584395	-0.99408	-0.0376008	-1.37534
3.5_604.139				604.139		3.5	30	15	15	0	0.847366	0.841222	1.38865	1.32978	-0.310765	-0.5745	-0.395937	-0.9008	-1.17376	-1.05126
3.5_536.186				536.186		3.5	30	15	15	0	0.846443	-0.188318	1.61922	0.33179	1.13513	-0.336758	0.0299417	-0.814083	-1.38078	-1.24258
3.5_534.173				534.173		3.5	30	15	15	0	0.821143	0.843506	1.82091	0.727694	-0.199914	-0.705789	-0.270552	-0.781866	-1.16956	-1.08557
3.49_674.154				674.154		3.49	30	15	15	0	0.272973	0.763978	-0.195711	-0.0440959	2.39994	-0.490145	-0.0939007	-0.797587	-0.841544	-0.973902
3.49_464.095				464.095		3.49	39	15	15	9	1.3278	0.0919019	1.80202	0.717964	-0.554474	-0.720068	0.0197519	-0.529977	-1.21288	-0.94205
3.49_454.204				454.204		3.49	35	15	15	5	0.48768	0.00944494	0.198687	1.66615	0.328004	-1.3364	1.25487	-1.225	-0.793531	-0.589909
3.49_426.062				426.062		3.49	30	15	15	0	1.02661	0.345458	2.02366	0.148288	-0.0254823	-0.664655	-0.227675	-0.0946401	-1.29673	-1.23484
3.49_1056.383				1056.38		3.49	30	15	15	0	0.288484	0.362962	2.12872	0.747926	0.355068	-0.929173	-0.524661	-0.258607	-1.14293	-1.02779
3.48_720.152				720.152		3.48	30	15	15	0	-0.0367896	0.854653	-0.337329	-0.314448	2.42342	-0.245356	0.159664	-0.860457	-0.765963	-0.877392
3.48_688.161				688.161		3.48	30	15	15	0	0.13279	0.508896	0.404613	-0.0799152	2.41837	-0.726679	-0.15948	-0.619479	-0.907967	-0.971149
3.48_652.167				652.167		3.48	30	15	15	0	-0.00564555	0.586845	0.394881	0.183088	2.35524	-0.655039	-0.229427	-0.589388	-0.95716	-1.08339
3.48_638.183				638.183		3.48	30	15	15	0	0.00474315	0.546941	0.396253	0.0210065	2.41918	-0.644969	-0.205745	-0.614974	-0.903902	-1.01853
3.48_636.202				636.202		3.48	30	15	15	0	0.0631678	0.544926	0.319384	-0.112506	2.44503	-0.703976	-0.0777611	-0.646748	-0.848399	-0.98312
3.48_630.134				630.134		3.48	30	15	15	0	0.125911	0.590712	0.343869	0.235016	2.31437	-0.669049	-0.177602	-0.689114	-1.02275	-1.05136
3.48_621.126				621.126		3.48	30	15	15	0	0.145912	0.665493	0.110515	0.122855	2.39193	-0.653558	-0.202011	-0.616167	-0.915292	-1.04968
3.48_612.236				612.236		3.48	30	15	15	0	-0.00354813	0.581561	0.760583	0.0309927	2.25579	-0.797426	-0.327843	-0.500308	-0.985254	-1.01455
3.48_610.175				610.175		3.48	30	15	15	0	0.145742	0.39844	0.64103	0.257672	2.2607	-0.637834	-0.20039	-0.790632	-0.975667	-1.09906
3.48_606.168				606.168		3.48	30	15	15	0	-0.114703	0.772285	0.514935	-0.0440781	2.29398	-0.753447	-0.0835386	-0.676364	-0.897332	-1.01174
3.48_600.212				600.212		3.48	30	15	15	0	0.0968045	0.631572	0.798809	0.305492	2.06288	-0.737321	-0.332187	-0.505416	-1.12318	-1.19745
3.48_592.173				592.173		3.48	30	15	15	0	0.104993	0.526188	0.303903	-0.0354179	2.43358	-0.648991	-0.125168	-0.642053	-0.889421	-1.02762
3.48_590.195				590.195		3.48	30	15	15	0	0.245507	0.433245	0.435601	0.188528	2.30314	-0.683808	-0.124419	-0.638823	-1.06279	-1.09618
3.48_585.205				585.205		3.48	30	15	15	0	0.565253	0.743969	1.06261	-0.0243467	1.76916	-0.922574	-0.432526	-0.488283	-1.0781	-1.19516
3.48_568.215				568.215		3.48	34	15	15	4	-0.0399868	0.401816	0.864124	0.264297	2.20418	-0.829992	-0.378959	-0.405767	-1.00629	-1.07342
3.48_564.181				564.181		3.48	30	15	15	0	0.28963	0.315689	1.0481	0.344565	1.93901	-0.903033	-0.42441	-0.263249	-1.06832	-1.27799
3.48_560.184				560.184		3.48	30	15	15	0	0.100942	0.407269	1.19091	0.129659	1.99815	-1.01859	-0.373337	-0.409502	-0.999401	-1.0261
3.48_558.186				558.186		3.48	30	15	15	0	0.115024	0.58592	1.17635	0.171948	1.92732	-0.905277	-0.451449	-0.509981	-0.998474	-1.11138
3.48_522.21				522.21		3.48	35	15	15	5	-0.0678214	0.406067	0.86718	0.247186	2.21884	-0.825122	-0.376323	-0.42608	-0.995995	-1.04793
3.48_484.212				484.212		3.48	30	15	15	0	-0.487295	-0.0796545	1.39369	2.13973	0.26875	-0.758271	-0.683612	-0.551585	-0.469797	-0.771953
3.48_466.204				466.204		3.48	30	15	15	0	-0.600179	0.289254	1.09917	2.07011	0.686375	-0.644351	-0.495258	-0.807126	-0.761778	-0.836214
3.48_342.144				342.144		3.48	30	15	15	0	-0.0312958	0.435878	0.789269	0.185582	2.24106	-0.820247	-0.330627	-0.366843	-1.02143	-1.08135
3.48_1097.33				1097.33		3.48	30	15	15	0	-0.121708	0.403248	0.927721	0.229339	2.21179	-0.78813	-0.469956	-0.375076	-1.00773	-1.0095
3.48_1090.422				1090.42		3.48	30	15	15	0	-0.157939	0.170827	1.30801	0.314478	1.99699	-0.90403	-0.632629	-0.140837	-0.97278	-0.982087
3.48_1082.38				1082.38		3.48	30	15	15	0	-0.0803791	0.412136	0.893576	0.192688	2.23437	-0.849847	-0.526741	-0.334808	-0.978373	-0.962625
3.48_1074.428				1074.43		3.48	30	15	15	0	0.201781	0.156996	1.26202	0.419067	1.59031	-1.05081	-0.689968	0.481085	-1.09593	-1.27455
3.47_514.261				514.261		3.47	39	15	15	9	-0.791324	0.159602	-1.01734	1.35962	1.20316	-0.576976	1.17975	0.138173	-0.15486	-1.49981
3.47_478.074				478.074		3.47	40	15	15	10	0.224836	-0.148701	0.481524	2.36948	-0.0546934	-0.654556	0.390498	-0.478994	-1.08085	-1.04854
3.47_404.166				404.166		3.47	30	15	15	0	-0.488764	0.370675	1.38863	1.00646	1.37013	-1.2651	-0.182006	-0.479455	-1.34066	-0.379916
3.47_378.188				378.188		3.47	30	15	15	0	-0.948845	1.09358	0.360252	2.11953	0.136177	-0.660659	-0.129144	-0.0714156	-0.929767	-0.969707
3.47_368.203				368.203		3.47	30	15	15	0	-0.193595	0.487709	0.454496	2.144	0.926211	-0.8539	-0.57971	-0.547277	-0.848975	-0.988955
3.47_354.111				354.111		3.47	30	15	15	0	-0.346172	1.48917	0.561266	-1.15617	0.185536	-0.112155	0.426457	1.18038	-0.441116	-1.78719
3.47_304.129				304.129		3.47	10	0	0	10	<LOD	<LOD	<LOD	<LOD	<LOD	<LOD	<LOD	<LOD	<LOD	<LOD
3.47_238.157				238.157		3.47	24	0	14	10	<LOD	<LOD	<LOD	<LOD	<LOD	-0.852365	-0.65807	-0.314227	1.64615	0.178512
3.47_208.11				208.11		3.47	10	0	0	10	<LOD	<LOD	<LOD	<LOD	<LOD	<LOD	<LOD	<LOD	<LOD	<LOD
3.46_718.171				718.171		3.46	30	15	15	0	0.749069	0.435356	0.154527	-0.401732	2.15686	-0.653825	0.164222	-0.267438	-0.889977	-1.44707
3.46_682.176				682.176		3.46	30	15	15	0	0.851709	0.566842	0.498948	0.0769846	1.90988	-0.852705	-0.119831	-0.523383	-0.944382	-1.46407
3.46_668.195				668.195		3.46	30	15	15	0	0.598344	0.745749	0.273996	-0.0358234	1.98226	-0.660159	-0.0484241	-0.212775	-1.09409	-1.54908
3.46_666.212				666.212		3.46	30	15	15	0	0.965608	0.658046	0.0347401	-0.372653	1.98638	-0.777535	-0.138242	-0.0887599	-0.717692	-1.54989
3.46_650.182				650.182		3.46	30	15	15	0	0.888509	0.233978	1.30149	0.374473	1.20285	-1.06182	-0.45824	0.154169	-1.17461	-1.46079
3.46_630.214				630.214		3.46	30	15	15	0	0.578057	0.421291	0.554977	0.430454	1.74741	-0.96323	-0.454472	0.342285	-1.04474	-1.61203
3.46_622.178				622.178		3.46	39	15	15	9	-0.539332	-0.325382	-0.744826	-0.819233	0.277822	-1.25698	0.83509	1.8375	1.19713	-0.461786
3.46_615.215				615.215		3.46	30	15	15	0	1.4402	0.698263	0.841813	0.032617	0.991801	-0.991647	-0.540911	0.0816021	-0.959459	-1.59428
3.46_598.225				598.225		3.46	30	15	15	0	0.522836	0.448605	0.960968	0.38435	1.57032	-0.983138	-0.5028	0.270175	-1.08272	-1.5886
3.46_588.197				588.197		3.46	38	15	15	8	0.606342	0.566542	1.21109	0.379903	1.3131	-1.09655	-0.495021	0.109803	-1.02465	-1.57056
3.46_554.218				554.218		3.46	37	15	15	7	0.679575	0.303846	-0.798711	-0.27636	2.27814	-0.967993	-0.165456	0.523613	-0.6149	-0.961752
3.46_552.22				552.22		3.46	38	15	15	8	0.574497	0.40883	0.944316	0.299776	1.63868	-1.03147	-0.486717	0.247969	-1.06956	-1.52633
3.46_372.154				372.154		3.46	30	15	15	0	0.946645	-0.0983147	0.990993	0.42162	1.57753	-0.390287	-0.537091	-0.104142	-1.23822	-1.56873
3.45_714.271				714.271		3.45	30	15	15	0	-0.705193	0.408234	1.26228	0.986635	1.55424	-1.09136	-0.368751	-0.332071	-0.384066	-1.32995
3.45_684.261				684.261		3.45	30	15	15	0	0.259817	0.742963	1.21327	0.209416	1.65086	-0.795686	-0.406296	-0.498352	-0.820557	-1.55544
3.45_668.266				668.266		3.45	30	15	15	0	-0.740412	0.298401	1.26804	0.909213	1.67718	-1.09117	-0.271508	-0.399086	-0.419581	-1.23107
3.45_538.203				538.203		3.45	15	9	6	0	-0.379934	<LOD	1.82869	0.294989	1.30102	-1.28169	-0.321333	-0.0771228	-0.838597	-0.526017
3.45_536.186				536.186		3.45	30	15	15	0	0.981881	0.433465	1.5315	0.443303	0.00110783	-0.350208	0.563339	-0.759086	-1.07487	-1.77044
3.45_492.197				492.197		3.45	37	14	14	9	-0.0975951	0.0034182	1.55684	0.120641	1.41766	-1.24813	-0.876815	0.845794	-0.955992	-0.765823
3.45_459.156				459.156		3.45	25	0	15	10	<LOD	<LOD	<LOD	<LOD	<LOD	-0.94259	-0.0601321	1.28293	0.703327	-0.983533
3.44_604.137				604.137		3.44	30	15	15	0	-0.200202	1.52838	0.113929	0.30945	0.230126	1.01021	0.601244	-0.900396	-0.778872	-1.91387
3.44_602.16				602.16		3.44	30	15	15	0	0.514927	1.27751	0.944961	-0.351468	0.0976673	0.52928	0.558854	-0.412015	-1.17818	-1.98154
3.44_534.173				534.173		3.44	30	15	15	0	0.549634	1.08605	1.32967	0.520351	-0.224097	-0.310814	0.194381	0.035414	-1.24702	-1.93357
3.44_526.197				526.197		3.44	23	8	15	0	-1.11136	-1.09143	-0.744427	<LOD	-0.388771	-0.165928	-0.168244	0.794673	1.59069	1.28479
3.44_504.182				504.182		3.44	30	15	15	0	-0.575747	-0.31443	2.32838	1.06154	0.414905	-0.874778	-0.66952	-0.486343	-0.376787	-0.507223
3.44_486.23				486.23		3.44	30	15	15	0	-1.34876	-1.00227	-0.131438	0.865633	0.0833327	0.176294	0.882163	1.72605	0.0193701	-1.27037
3.44_468.173				468.173		3.44	30	15	15	0	-0.737739	0.150834	1.58086	1.74687	-0.0350279	-1.34423	-0.390303	0.310867	-0.60065	-0.681476
3.44_458.216				458.216		3.44	15	0	15	0	<LOD	<LOD	<LOD	<LOD	<LOD	-1.15768	-0.818399	0.0693116	1.24262	0.664148
3.44_354.111				354.111		3.44	30	15	15	0	0.314015	1.43431	0.943411	0.0892312	0.0597515	-0.588591	0.429628	0.408423	-1.06024	-2.02994
3.44_342.112				342.112		3.44	30	15	15	0	0.337415	1.15306	1.3216	0.525203	-0.0667836	-0.694381	0.328961	0.151439	-1.17811	-1.8784
3.43_488.098				488.098		3.43	30	15	15	0	1.32453	0.355904	0.940311	0.604018	-0.0631322	-0.903921	0.365084	0.427527	-1.32446	-1.72587
3.43_415.975				415.975		3.43	30	15	15	0	0.0210761	0.267667	1.31088	1.53098	1.08943	-0.725572	-0.704744	-0.77653	-0.89221	-1.12098
3.43_288.063				288.063		3.43	33	15	15	3	-0.0679735	0.0598639	1.52247	1.49171	1.01097	-0.76095	-0.60581	-0.727825	-0.734405	-1.18806
3.43_262.093				262.093		3.43	19	9	10	0	<LOD	<LOD	1.17443	0.0873156	1.33033	<LOD	-1.38085	-0.806688	0.117086	-0.521623
3.42_580.181				580.181		3.42	30	15	15	0	-0.0614205	1.00683	1.20396	0.833561	0.403058	-0.944048	-0.0914811	0.514165	-0.980226	-1.88439
3.42_454.205				454.205		3.42	37	15	15	7	-0.303956	0.597553	1.20796	2.01916	0.140923	-0.86074	-0.386454	-0.486922	-1.03275	-0.89477
3.42_444.174				444.174		3.42	26	13	13	0	-0.11877	0.333525	1.64174	1.8819	-0.250594	-0.846271	-0.378158	-0.687362	-0.761217	-0.814796
3.42_406.09				406.09		3.42	30	15	15	0	-0.223669	0.469135	2.45566	0.53238	-0.494097	-1.10069	-0.417598	-0.00802309	-0.447962	-0.765131
3.42_354.189				354.189		3.42	30	15	15	0	-0.909613	0.418003	1.21572	2.02464	-0.161188	-1.10824	-0.244497	-0.621919	0.209385	-0.822284
3.42_340.173				340.173		3.42	30	15	15	0	-0.646254	0.0169392	0.969513	2.11202	0.914451	-0.802114	-0.451832	-0.778216	-0.695917	-0.638591
3.42_308.09				308.09		3.42	30	15	15	0	-0.367786	0.891015	0.914231	1.59925	-0.331815	-0.40136	0.475669	-0.678453	-0.180579	-1.92017
3.41_628.234				628.234		3.41	30	15	15	0	0.196929	1.19955	1.03375	0.484495	0.194077	-1.07445	-0.054203	0.871812	-1.11212	-1.73983
3.41_582.23				582.23		3.41	30	15	15	0	0.0479304	1.21932	0.909054	0.969487	0.111089	-1.08671	-0.0673699	0.637264	-0.930266	-1.8098
3.41_472.213				472.213		3.41	29	15	14	0	-0.233503	0.426908	1.17406	1.80373	0.751187	-0.540976	-0.490908	-0.687135	-0.842919	-1.36044
3.41_434.121				434.121		3.41	30	15	15	0	0.612387	0.547465	2.00992	0.501178	0.182845	-0.870959	-0.354304	-0.158189	-1.37741	-1.09294
3.41_165.043				165.043		3.41	23	0	13	10	<LOD	<LOD	<LOD	<LOD	<LOD	-0.866089	-0.500158	-0.5361	1.62306	0.279285
3.4_368.204				368.204		3.4	30	15	15	0	0.339236	-0.96791	1.49648	0.152874	1.50124	-1.30599	0.541908	-1.08973	-0.437901	-0.230207
3.39_596.209				596.209		3.39	30	15	15	0	0.321699	0.455392	1.14919	0.347748	1.09811	-1.46559	0.60492	0.137302	-1.347	-1.30176
3.39_450.08				450.08		3.39	30	15	15	0	0.340301	1.30074	1.44231	0.940353	-0.0208706	-0.727698	-0.38989	-0.250844	-1.3971	-1.23731
3.39_384.198				384.198		3.39	26	11	15	0	-0.603103	-0.438112	-0.476087	-0.359328	-0.554141	-0.598825	-0.0600774	-0.618237	1.56868	2.13923
3.39_322.161				322.161		3.39	17	13	4	0	-0.0439684	-0.901761	1.7927	0.707665	-0.582631	-1.0598	0.0878009	<LOD	<LOD	<LOD
3.39_174.089				174.089		3.39	40	15	15	10	-0.182669	-0.778726	2.65295	-0.0662255	-0.183733	-0.400603	0.484502	-0.500829	-0.274725	-0.74994
3.38_540.109				540.109		3.38	28	14	14	0	-0.40669	0.823552	1.09706	-0.832382	-0.0481263	-1.10021	0.0991467	1.88725	-1.16045	-0.359152
3.38_538.129				538.129		3.38	30	15	15	0	-0.199983	1.09818	1.23897	-1.05713	0.0996149	-1.13097	-0.226365	1.53842	-1.16444	-0.196298
3.38_523.053				523.053		3.38	28	14	14	0	-0.302897	0.826043	0.955678	-1.04344	-0.0416947	-1.00902	0.192487	1.90436	-1.21133	-0.270169
3.38_487.132				487.132		3.38	30	15	15	0	0.00619645	0.618072	1.95823	-0.86744	-0.285777	-1.01216	-0.402839	1.29813	-0.984868	-0.32755
3.38_468.161				468.161		3.38	37	15	14	8	-0.405818	0.838597	1.37664	-0.873541	-0.259326	-0.843898	-0.239722	1.83365	-1.07184	-0.354747
3.38_462.113				462.113		3.38	28	14	14	0	-0.365734	0.451529	1.79032	-0.708202	-0.387362	-1.0786	0.164265	1.52669	-1.09286	-0.300049
3.38_460.113				460.113		3.38	30	15	15	0	-0.282372	0.623736	1.79355	-0.776111	-0.223208	-0.996636	-0.45775	1.55176	-0.998164	-0.234803
3.38_382.183				382.183		3.38	30	15	15	0	-0.444483	0.958267	1.09099	1.46969	0.904221	-1.09088	-0.5423	-0.512227	-1.29699	-0.536299
3.37_500.246				500.246		3.37	35	15	15	5	-0.2538	0.624051	0.826841	2.16731	-0.0358846	-0.786508	0.170553	-0.838717	-0.767869	-1.10598
3.37_218.115				218.115		3.37	24	0	15	9	<LOD	<LOD	<LOD	<LOD	<LOD	-0.870816	0.634458	1.33981	-0.0852271	-1.01823
3.36_516.239				516.239		3.36	30	15	15	0	-0.582481	0.274979	0.725008	2.24253	0.703398	-0.83346	-0.417331	-0.403541	-0.70689	-1.00221
3.36_466.111				466.111		3.36	30	15	15	0	0.739829	0.580245	1.45416	-0.411182	1.53315	-0.926812	-0.727124	-0.39423	-1.26391	-0.584124
3.35_308.146				308.146		3.35	30	15	15	0	0.512176	0.35094	1.67061	0.949243	0.770675	-0.815204	-0.550407	-0.344564	-1.20961	-1.33386
3.35_164.049				164.049		3.35	40	15	15	10	0.0424137	0.323492	0.0229908	0.179665	2.17387	0.0554113	0.52923	-1.3931	-1.1102	-0.823775
3.34_498.23				498.23		3.34	18	3	8	7	<LOD	0.15988	<LOD	<LOD	1.76644	-0.960997	-1.21715	0.158158	0.50497	-0.411302
3.34_434.121				434.121		3.34	30	15	15	0	-0.430736	0.612551	1.99583	1.11615	0.300618	-1.18706	-0.383719	-0.355397	-0.985087	-0.683153
3.34_384.199				384.199		3.34	30	15	15	0	0.55348	1.78678	0.792856	0.569645	0.37285	-0.788838	-0.0339427	-0.676244	-1.22193	-1.35466
3.34_370.184				370.184		3.34	30	15	15	0	-0.254518	0.506469	0.869015	1.87678	0.923033	-0.604781	-0.351918	-0.699981	-1.07473	-1.18937
3.34_320.146				320.146		3.34	30	15	15	0	0.122794	0.827465	2.07441	0.736313	0.0531854	-0.792729	-0.255858	-0.548928	-1.11416	-1.10249
3.33_262.098				262.098		3.33	30	15	15	0	-1.17822	-0.430072	-0.518624	-0.21759	-0.771296	-0.496744	-0.463265	1.01151	1.94211	1.12218
3.32_702.218				702.218		3.32	30	15	15	0	0.23263	0.0132871	1.66426	1.30891	0.885527	-0.959922	-0.52271	-0.591343	-1.20563	-0.825005
3.32_575.106				575.106		3.32	30	15	15	0	-0.840293	0.827912	0.506102	1.33379	1.63519	-0.75682	-0.123706	-0.887853	-0.637698	-1.05663
3.32_546.153				546.153		3.32	30	15	15	0	-0.82465	0.784177	0.757391	1.33318	1.54702	-1.01807	-0.264424	-0.719736	-0.617917	-0.976976
3.32_544.176				544.176		3.32	30	15	15	0	-0.60763	0.840477	0.730898	1.23951	1.57357	-0.951257	-0.15885	-0.881354	-0.696466	-1.0889
3.32_530.105				530.105		3.32	30	15	15	0	-0.813354	0.757838	1.05131	1.18899	1.45738	-0.860183	-0.193313	-0.968977	-0.593832	-1.02586
3.32_528.161				528.161		3.32	30	15	15	0	-0.556903	0.349406	1.18471	1.79696	0.888288	-0.992458	-0.27082	-0.49819	-0.822544	-1.07845
3.32_518.158				518.158		3.32	30	15	15	0	-0.713694	0.982906	0.606486	1.43735	1.39559	-0.784594	-0.236928	-0.908943	-0.709929	-1.06825
3.32_500.148				500.148		3.32	30	15	15	0	-0.65528	0.805194	0.511467	0.881534	1.93674	-0.898898	-0.0125969	-0.845369	-0.610633	-1.11216
3.32_493.179				493.179		3.32	30	15	15	0	-0.0159495	0.750008	1.17474	1.48158	0.930019	-0.994195	-0.505187	-0.807859	-0.813577	-1.19959
3.32_476.189				476.189		3.32	33	15	15	3	-0.673757	0.63209	1.06985	1.63853	1.11243	-0.905807	-0.38036	-0.741702	-0.751336	-0.999935
3.32_468.159				468.159		3.32	30	15	15	0	-0.605298	0.691436	1.3255	1.35792	1.12837	-0.976169	-0.403434	-0.771955	-0.723315	-1.02306
3.32_466.159				466.159		3.32	30	15	15	0	-0.560147	0.647912	1.23504	1.45419	1.1399	-0.969742	-0.397094	-0.794005	-0.709682	-1.04637
3.32_430.183				430.183		3.32	30	15	15	0	-0.685377	0.670428	1.01864	1.58153	1.1934	-0.929994	-0.352175	-0.740533	-0.738694	-1.01722
3.32_400.212				400.212		3.32	30	15	15	0	-0.240755	0.270834	1.53186	1.19797	1.24423	-1.17593	-0.649653	-0.825034	-0.93875	-0.414779
3.32_380.168				380.168		3.32	30	15	15	0	-0.684005	0.16623	1.01764	2.0098	0.978177	-0.729841	-0.539534	-0.665621	-0.764422	-0.788426
3.31_596.136				596.136		3.31	40	15	15	10	-0.453795	0.725532	0.873812	1.63675	1.08103	-0.919578	-0.0525825	-0.898581	-0.908237	-1.08435
3.31_541.122				541.122		3.31	30	15	15	0	-0.555126	0.393547	0.232487	1.65734	1.7722	-0.634888	-0.427772	-0.813309	-0.693037	-0.931443
3.31_512.168				512.168		3.31	30	15	15	0	-0.498085	0.447236	0.637997	1.73265	1.47409	-0.744636	-0.519506	-0.793033	-0.803139	-0.933567
3.31_510.191				510.191		3.31	30	15	15	0	-0.399203	0.153704	0.976231	1.82753	1.25215	-0.727015	-0.593082	-0.7721	-0.816215	-0.901999
3.31_508.103				508.103		3.31	30	15	15	0	-0.426846	0.379909	0.937245	1.78705	1.21446	-0.767175	-0.528853	-0.799783	-0.84397	-0.952042
3.31_504.182				504.182		3.31	30	15	15	0	-0.700217	-0.46255	2.43246	-0.319381	-0.264233	-0.799249	-0.297429	1.09756	-0.203482	-0.483477
3.31_478.112				478.112		3.31	29	15	14	0	0.901975	0.0605026	1.07303	-1.60949	-0.251452	-1.0129	1.46387	0.371246	-1.03422	0.0374438
3.31_442.205				442.205		3.31	30	15	15	0	-0.595496	0.197444	0.904084	1.95164	1.14612	-0.737429	-0.505694	-0.726645	-0.772447	-0.861581
3.31_436.193				436.193		3.31	30	15	15	0	0.505108	-0.0181722	1.91611	0.00734418	1.37921	-0.598434	-0.668994	-0.452817	-1.13199	-0.937365
3.31_396.199				396.199		3.31	30	15	15	0	-0.532789	0.00233398	0.966816	1.94443	1.18365	-0.687357	-0.533621	-0.716692	-0.760893	-0.865877
3.31_392.203				392.203		3.31	30	15	15	0	-0.187666	0.19718	1.75348	1.50734	0.283848	-0.528856	-0.49133	-0.110549	-1.09182	-1.33161
3.31_282.075				282.075		3.31	30	15	15	0	0.0680442	0.545232	1.89816	1.4754	-0.519323	-1.0598	-0.449956	-0.525902	-0.612729	-0.819116
3.3_706.303				706.303		3.3	30	15	15	0	-0.223913	0.445146	1.27072	2.11426	-0.00460865	-0.724004	-0.560147	-0.690586	-0.693691	-0.933173
3.3_489.164				489.164		3.3	19	4	15	0	<LOD	-0.845525	-0.892242	-0.682191	<LOD	-0.898485	-0.197851	1.12362	1.35792	1.03475
3.3_473.169				473.169		3.3	22	7	15	0	-0.834852	-0.721081	-0.715236	<LOD	-0.440936	-0.951607	-0.042305	1.85937	0.984244	0.862403
3.3_472.159				472.159		3.3	29	14	15	0	-0.276143	0.468843	1.52618	-0.793931	0.625281	-0.982233	-0.636854	1.59599	-1.13086	-0.396266
3.3_466.112				466.112		3.3	30	15	15	0	1.23235	0.346451	1.99409	-0.0484449	-0.740727	-0.651817	0.227465	-0.816873	-1.27142	-0.271072
3.3_459.194				459.194		3.3	30	15	15	0	-0.0677801	0.354652	1.05722	1.76216	1.05438	-0.797169	-0.624547	-0.869004	-0.880209	-0.989703
3.3_434.173		C26H26O6	434.173	434.173	-0.06	3.3	30	15	15	0	-0.322308	0.18133	0.973108	2.05364	0.881247	-0.774083	-0.519513	-0.743475	-0.820061	-0.909889
3.3_432.188				432.188		3.3	30	15	15	0	-0.25084	0.105274	1.18869	1.85076	0.995031	-0.919338	-0.561199	-0.759004	-0.800174	-0.849198
3.3_242.115				242.115		3.3	30	15	15	0	0.851589	1.08125	-0.333788	1.185	-0.275436	-0.249463	0.981745	-0.440205	-0.968841	-1.83186
3.29_832.313				832.313		3.29	30	15	15	0	0.723155	0.750886	1.86602	0.743306	-0.676904	-0.328105	-0.968988	-0.0775149	-0.626269	-1.40559
3.29_688.161				688.161		3.29	30	15	15	0	1.32546	0.191952	-0.128021	-1.43473	1.95639	0.211415	-0.240739	-0.536523	-0.606567	-0.738632
3.29_652.17				652.17		3.29	30	15	15	0	0.789627	0.906623	0.803675	-0.0697863	1.67185	-0.560153	-0.383596	-0.6375	-1.08107	-1.43967
3.29_638.179				638.179		3.29	30	15	15	0	1.21667	0.933157	0.25152	-1.10772	1.62893	-0.0578066	-0.174879	-0.598144	-0.795039	-1.29669
3.29_636.201				636.201		3.29	30	15	15	0	1.70928	0.722124	0.153451	-1.12144	1.41715	-0.101589	-0.292937	-0.770487	-0.627479	-1.08807
3.29_622.131				622.131		3.29	30	15	15	0	1.20239	0.596125	0.54377	-0.240119	1.63216	-0.231387	-0.21572	-0.564392	-1.52889	-1.19393
3.29_620.18				620.18		3.29	30	15	15	0	0.803348	0.373934	1.73318	0.077128	0.779883	-0.770589	-1.07625	0.357277	-0.891474	-1.38644
3.29_612.205				612.205		3.29	30	15	15	0	-0.107434	0.0809811	2.53142	-0.156031	0.298798	-0.193926	0.0409493	-0.879402	-1.22173	-0.393625
3.29_610.186				610.186		3.29	30	15	15	0	1.92024	0.184824	-0.358433	-0.491223	1.43556	0.339795	-0.491507	-0.522209	-0.705292	-1.31176
3.29_606.167				606.167		3.29	30	15	15	0	0.633225	0.767565	0.793364	-0.332244	1.8226	-0.338427	-0.0807715	-0.757243	-1.02112	-1.48695
3.29_600.204				600.204		3.29	30	15	15	0	0.74844	0.387506	1.75943	0.043333	1.0781	-0.532958	-0.799638	-0.226449	-1.09685	-1.36091
3.29_590.195				590.195		3.29	30	15	15	0	1.2479	0.562739	0.402696	-0.394357	1.80465	-0.385855	-0.280535	-0.481631	-1.12	-1.35561
3.29_585.205				585.205		3.29	30	15	15	0	2.3223	0.660883	0.121531	-0.911681	0.520165	-0.137278	-0.543454	-0.205961	-0.792907	-1.0336
3.29_568.215				568.215		3.29	35	15	15	5	0.803452	0.696455	1.50508	-0.0240015	1.14424	-0.652853	-0.711135	-0.214958	-1.08028	-1.466
3.29_560.181				560.181		3.29	30	15	15	0	1.94327	0.3918	0.682464	-0.353273	0.919321	-0.803441	-0.435999	-0.0606164	-0.835207	-1.44832
3.29_558.185				558.185		3.29	30	15	15	0	1.88799	1.07917	0.349479	-0.841678	-0.172418	-0.228484	-0.177162	0.291403	-0.4431	-1.74521
3.29_522.21				522.21		3.29	35	15	15	5	1.10155	0.349669	1.7244	-1.03472	0.372513	0.0209164	-0.435577	0.323778	-0.856313	-1.56622
3.29_500.188				500.188		3.29	38	15	15	8	-0.227169	0.477665	1.12829	1.06117	1.58925	-1.22136	-0.924851	-0.24166	-0.967162	-0.67417
3.29_470.198				470.198		3.29	13	0	13	0	<LOD	<LOD	<LOD	<LOD	<LOD	-1.49088	-0.158893	0.452095	1.24321	-0.0455249
3.29_432.192				432.192		3.29	35	15	15	5	-0.683209	0.282283	1.19824	1.78453	0.967522	-1.0794	-0.738001	-0.22475	-0.731451	-0.775773
3.29_360.156				360.156		3.29	30	15	15	0	-0.242992	1.22104	2.09491	-0.654074	0.296067	-0.265781	-0.881978	0.146389	-0.53444	-1.17913
3.29_345.133				345.133		3.29	30	15	15	0	0.779481	0.36402	1.75107	0.193745	0.888826	-0.668834	-0.440051	-0.230222	-1.00876	-1.62927
3.29_118.042				118.042		3.29	30	15	15	0	0.773051	1.48792	1.24346	0.767776	-1.11791	-0.318907	-0.331593	-0.492154	-0.602174	-1.40947
3.29_1097.328				1097.33		3.29	30	15	15	0	1.11337	0.614374	1.53641	-0.137996	0.734842	-0.594123	-0.80413	0.128638	-1.08408	-1.5073
3.29_1090.423				1090.42		3.29	30	15	15	0	0.699076	0.360927	2.20952	0.0288067	0.171022	-0.690487	-0.824019	0.166343	-0.926798	-1.19439
3.28_612.248				612.248		3.28	30	15	15	0	-0.692584	0.193259	1.25376	1.50848	0.859191	-1.58682	-1.00721	-0.543289	-0.178929	0.194137
3.28_480.09				480.09		3.28	30	15	15	0	0.796292	0.848916	1.64642	0.850937	0.0875165	-0.555474	-0.508322	-0.628516	-1.16719	-1.37059
3.28_406.178				406.178		3.28	30	15	15	0	0.265305	1.88586	0.977971	0.324551	0.285256	-0.715878	-1.03364	0.278413	-1.13809	-1.12976
3.28_392.127				392.127		3.28	28	13	15	0	-1.04229	-0.95198	-0.973795	-0.785825	-0.85277	0.50733	1.39744	0.953664	1.05647	0.691755
3.28_324.142		C13H24O9	324.142	324.142	0.03	3.28	30	15	15	0	-1.01972	-0.955749	-0.908699	-0.827831	-0.901871	0.368412	1.27794	0.983263	1.08699	0.897261
3.27_642.143				642.143		3.27	30	15	15	0	0.434908	1.07931	1.52967	0.852236	-0.720721	-0.566948	0.463107	-0.524248	-1.22278	-1.32454
3.27_516.242				516.242		3.27	30	15	15	0	-0.437935	0.421838	1.24013	2.01345	0.339445	-0.766224	-0.349223	-0.478305	-0.894532	-1.08864
3.27_400.212				400.212		3.27	30	15	15	0	0.00844665	0.206918	1.46229	1.40239	1.04791	-1.25693	-0.795331	-0.447584	-0.903185	-0.724923
3.27_314.113				314.113		3.27	30	15	15	0	-1.94042	0.795427	1.17594	0.393801	1.28249	-0.789728	-0.257007	-0.49839	0.402744	-0.56486
3.26_493.205				493.205		3.26	23	0	14	9	<LOD	<LOD	<LOD	<LOD	<LOD	-0.799396	0.406156	1.55857	-0.373091	-0.792243
3.26_492.184				492.184		3.26	34	15	15	4	-0.721496	0.26841	0.620682	2.03838	1.13395	-0.735358	-0.195309	-0.671033	-0.725234	-1.01299
3.26_446.173				446.173		3.26	29	15	14	0	-0.420163	0.33671	1.14872	1.71767	1.06734	-1.2178	-0.431645	-0.665298	-0.838575	-0.696963
3.26_378.188				378.188		3.26	30	15	15	0	-0.294337	0.494162	1.06333	1.82581	0.86712	-0.743358	-0.351691	-0.781389	-0.996834	-1.08282
3.26_212.069				212.069		3.26	34	15	15	4	-0.297761	-0.364612	-0.0400881	-0.347859	-0.211898	-0.373873	-0.380679	2.82793	-0.406194	-0.404968
3.25_512.168				512.168		3.25	30	15	15	0	-0.794136	0.344359	0.845938	1.95641	1.03282	-0.985574	-0.336647	-0.422744	-0.693724	-0.9467
3.25_508.187				508.187		3.25	23	8	15	0	-0.774807	0.731719	1.89683	<LOD	1.11597	-0.846183	-0.35087	-0.579157	-0.337781	-0.855721
3.25_502.226				502.226		3.25	30	15	15	0	0.405329	0.246031	2.01255	1.21996	0.0167825	-1.12504	-0.668412	-0.862213	-0.674202	-0.570783
3.25_486.23				486.23		3.25	40	15	15	10	-0.801567	-0.317387	0.721604	0.475145	-0.556334	-0.409362	2.22186	-1.4454	0.0317196	0.079717
3.25_458.197				458.197		3.25	30	15	15	0	-0.391848	0.326038	1.60098	1.73861	0.472637	-0.946014	-0.698182	-0.601657	-0.576205	-0.924364
3.25_456.184		C18H32O13	456.184	456.184	0.29	3.25	30	15	15	0	-1.35779	-1.07491	-0.745439	0.410372	-0.538957	-0.674313	0.815273	1.36397	1.33874	0.463054
3.25_442.205				442.205		3.25	40	15	15	10	-0.811606	0.351122	1.23644	1.86486	0.821575	-0.926432	-0.46956	-0.650984	-0.580625	-0.834789
3.25_440.189				440.189		3.25	39	15	15	9	-0.733063	0.343509	1.23725	1.86946	0.814791	-0.970267	-0.478176	-0.660831	-0.576607	-0.846066
3.25_432.176				432.176		3.25	28	14	14	0	-0.314395	0.0678578	1.49654	1.62278	0.950555	-0.977102	-0.786687	-0.389958	-0.850303	-0.819294
3.25_396.199				396.199		3.25	30	15	15	0	-0.718549	0.302781	1.66948	1.096	1.26854	-0.918687	-0.59203	-0.631109	-0.501852	-0.974575
3.25_370.184				370.184		3.25	30	15	15	0	-0.13029	0.716449	1.55077	1.57485	0.0683472	-0.591183	-0.231896	-0.567731	-1.19828	-1.19104
3.25_330.131		C15H22O8	330.131	330.131	0.47	3.25	30	15	15	0	1.29087	1.514	0.696294	-0.0933196	0.781183	-0.350585	-0.652853	-0.999182	-1.09123	-1.09517
3.25_207.089				207.089		3.25	40	15	15	10	-0.288948	0.672908	1.65358	0.973141	0.88479	-1.47283	-0.532245	-0.459574	-1.11048	-0.320343
3.24_500.246				500.246		3.24	35	15	15	5	-0.497777	0.422457	1.26421	2.04624	0.0835388	-0.929008	-0.015672	-0.631886	-0.89707	-0.845043
3.24_392.115				392.115		3.24	29	15	14	0	0.18516	1.23557	1.855	0.879382	-0.251716	-0.866052	-0.666743	-0.667272	-1.03989	-0.663444
3.24_386.121				386.121		3.24	30	15	15	0	-1.21478	-0.0777185	0.870737	1.95275	1.04701	-1.1188	-0.328873	-0.30337	-0.244988	-0.581976
3.24_322.162		C14H26O8	322.163	322.162	0.77	3.24	30	15	15	0	-0.830954	-0.721124	-0.374425	-0.508613	-0.759372	-0.748948	-0.131922	0.679847	1.76372	1.63179
3.23_682.179				682.179		3.23	30	15	15	0	1.30542	0.475032	0.808669	0.559371	1.17142	-0.555904	-0.835518	-0.24796	-1.15326	-1.52727
3.23_668.186				668.186		3.23	30	15	15	0	1.33831	0.662496	0.807058	0.0130001	0.927513	-0.345051	-0.0896301	-0.334143	-0.950963	-2.02859
3.23_666.211				666.211		3.23	30	15	15	0	1.60333	0.880402	0.0244963	-0.817645	1.37254	-0.310056	-0.477313	-0.120845	-0.607979	-1.54693
3.23_630.215				630.215		3.23	30	15	15	0	0.920389	0.754392	1.18992	0.424128	0.905153	-0.839043	-0.653727	0.10474	-1.1912	-1.61475
3.23_620.205				620.205		3.23	30	15	15	0	2.07005	-0.24546	-0.117499	-0.348234	-0.118354	-0.642961	1.56905	-0.54033	-0.723927	-0.902337
3.23_615.213				615.213		3.23	30	15	15	0	2.4311	0.18265	0.732069	-0.556777	-0.00794437	-0.383888	-0.551411	0.00745188	-0.782338	-1.07092
3.23_598.225				598.225		3.23	30	15	15	0	1.07745	0.459395	1.38966	0.541873	0.582096	-0.586947	-0.852426	0.132603	-1.04646	-1.69724
3.23_590.195				590.195		3.23	30	15	15	0	0.0840608	-0.0781225	0.540205	0.558612	0.434268	-0.993549	-0.543146	2.13936	-0.925982	-1.2157
3.23_588.196				588.196		3.23	30	15	15	0	1.43759	0.258002	1.59519	-0.282695	0.0226097	-0.996888	-0.834038	0.671649	-0.517335	-1.35409
3.23_552.22				552.22		3.23	30	15	15	0	1.16351	0.561562	1.32918	0.339718	0.689681	-0.733762	-0.86984	0.165344	-1.04729	-1.5981
3.23_476.137				476.137		3.23	30	15	15	0	-0.761871	0.269026	1.23366	1.31791	0.159552	-1.57488	-0.0628287	0.26709	-1.4602	0.612544
3.23_286.141				286.141		3.23	30	15	15	0	-0.697311	0.36125	0.540589	2.12598	0.838882	-0.785501	-0.330869	-0.442179	-0.23617	-1.37467
3.23_187.121				187.121		3.23	40	15	15	10	0.969557	-0.034902	2.2287	-1.00407	0.39929	0.00556293	-0.394194	-0.879408	-0.360215	-0.930325
3.22_636.19				636.19		3.22	30	15	15	0	1.20569	0.889336	0.801355	-0.340749	1.35299	-0.578111	-0.286017	-0.495732	-0.916142	-1.63262
3.22_568.215				568.215		3.22	30	15	15	0	0.566674	0.750147	1.70398	0.222625	0.960277	-0.729165	-0.729349	-0.293958	-1.01754	-1.43369
3.22_558.185				558.185		3.22	30	15	15	0	-0.0263731	-0.0768188	0.566084	-0.129438	-0.0842817	-0.637074	2.56565	-0.503011	-0.785917	-0.888818
3.22_430.147				430.147		3.22	15	0	15	0	<LOD	<LOD	<LOD	<LOD	<LOD	-1.35461	-0.708809	0.890854	0.284998	0.887567
3.22_374.1				374.1		3.22	30	15	15	0	0.586132	0.394	1.33868	-0.534262	1.82361	-0.822868	-0.612385	-0.300642	-1.2547	-0.61756
3.22_338.156				338.156		3.22	30	15	15	0	0.231868	0.060974	1.7515	1.40019	0.55712	-0.895687	-0.718567	-1.07811	-1.01922	-0.290062
3.22_162.089		C7H14O4	162.089	162.089	0.21	3.22	30	15	15	0	0.18626	0.915217	1.38903	1.32916	0.501515	-0.897812	-0.458898	-0.61851	-1.05234	-1.29362
3.21_582.228				582.228		3.21	30	15	15	0	-0.527901	1.17892	0.653218	1.27627	0.631669	-1.14901	-0.671221	0.727235	-0.652291	-1.46689
3.21_540.196				540.196		3.21	30	15	15	0	-0.688444	-0.0849675	0.387814	2.05324	1.45367	-0.65473	-0.403442	-0.605148	-0.631568	-0.82642
3.21_538.201				538.201		3.21	30	15	15	0	-0.298691	0.232039	2.37581	0.160756	0.432376	-0.311616	-0.479979	-1.45186	-0.746114	0.0872749
3.21_522.205				522.205		3.21	34	15	15	4	0.0568836	0.469222	1.42878	1.01314	1.28063	-0.905667	-0.695758	-0.397192	-0.93096	-1.31908
3.21_489.204				489.204		3.21	19	14	5	0	-0.211829	-0.246157	0.924821	1.77196	0.523161	-1.08261	-0.692092	-0.987251	<LOD	<LOD
3.21_486.229				486.229		3.21	40	15	15	10	-1.36935	-0.413758	0.921231	1.96088	-0.264785	-0.635124	0.665912	0.550421	-0.846231	-0.569199
3.21_472.215				472.215		3.21	30	15	15	0	-0.712595	-0.10913	0.448273	2.11232	1.35939	-0.684351	-0.476614	-0.563575	-0.606617	-0.767095
3.21_464.178				464.178		3.21	29	13	13	3	-0.482196	-0.3178	1.20576	2.38392	-0.291737	-0.587565	-0.286483	-0.447179	-0.338497	-0.838217
3.21_426.207				426.207		3.21	34	15	15	4	-0.688523	-0.138424	0.460636	2.05154	1.43906	-0.703548	-0.463162	-0.558117	-0.614154	-0.785307
3.21_376.114				376.114		3.21	29	14	15	0	-0.207492	-0.0474535	2.52206	-0.320826	0.895904	-0.631665	-0.542493	-0.346452	-0.690018	-0.631565
3.2_628.235				628.235		3.2	30	15	15	0	-0.247862	1.23881	0.643117	1.10953	0.791613	-1.15435	-0.697018	0.595096	-0.71326	-1.56568
3.2_588.114				588.114		3.2	30	15	15	0	0.425171	0.267877	2.27397	0.796453	-0.540258	-0.436219	-0.274926	-0.404852	-1.03972	-1.06749
3.2_524.17				524.17		3.2	29	14	15	0	-1.2859	-1.08232	-0.00475294	1.85852	0.817766	-1.19438	0.136731	0.497629	0.532297	-0.275592
3.2_454.208				454.208		3.2	35	15	15	5	-0.961828	-0.155367	0.596227	2.30259	0.823408	-1.03239	-0.493471	-0.325117	-0.287621	-0.466434
3.2_452.187				452.187		3.2	30	15	15	0	-0.423739	0.425756	1.50936	1.70354	0.612145	-0.875856	-0.441618	-0.722432	-0.853451	-0.933705
3.2_408.199				408.199		3.2	30	15	15	0	-0.933181	-0.212502	0.616544	2.33011	0.753055	-1.04038	-0.436023	-0.203826	-0.360755	-0.513038
3.2_400.212				400.212		3.2	30	15	15	0	-0.752733	0.229213	1.73255	1.7822	0.126172	-0.993825	-0.331463	-0.486167	-0.640777	-0.665172
3.2_370.126				370.126		3.2	30	15	15	0	-0.460875	1.4146	0.858582	0.379379	-0.413798	-1.02331	-0.539411	1.63705	-0.906228	-0.945983
3.2_354.189				354.189		3.2	30	15	15	0	-0.968665	0.682643	1.26113	1.37721	0.952012	-1.51848	-0.363624	-0.539924	-0.236868	-0.645436
3.2_222.087				222.087		3.2	29	14	15	0	-0.758359	-0.306063	0.992102	2.12412	0.688956	-1.26606	-0.738372	-0.104714	-0.285054	-0.346553
3.2_173.105				173.105		3.2	40	15	15	10	0.13192	0.973837	0.672413	1.25175	1.36451	-0.989674	-0.974953	-0.976438	-1.05362	-0.399747
3.19_510.227				510.227		3.19	30	15	15	0	-0.520637	0.296824	0.931618	2.13802	0.579267	-0.791104	-0.24716	-0.385198	-0.883153	-1.11847
3.19_502.225				502.225		3.19	30	15	15	0	-0.184027	0.248633	1.50893	1.73919	0.186653	-1.02	0.218146	-0.741546	-0.885761	-1.07022
3.19_296.147		C12H24O8	296.147	296.147	0.12	3.19	29	15	14	0	-0.0959917	0.15759	1.07515	1.88338	0.981825	-0.860897	-0.528297	-0.834854	-0.913419	-0.864488
3.18_169.045				169.045		3.18	40	15	15	10	-0.520074	-0.0777677	-0.848803	2.09598	1.36252	-0.660029	0.0467788	0.19112	-0.70688	-0.882839
3.17_760.277				760.277		3.17	30	15	15	0	0.28493	-0.0586178	0.774076	1.3781	1.54571	-0.494088	-0.467516	-0.34214	-1.22458	-1.39587
3.17_556.177				556.177		3.17	30	15	15	0	0.542159	0.321889	1.59701	1.59635	-0.15705	-0.984547	-0.512191	-0.410359	-0.781698	-1.21156
3.17_346.125				346.125		3.17	24	15	9	0	-0.475579	0.476381	1.05724	1.37786	0.507572	-0.884758	-0.598611	-1.4601	<LOD	<LOD
3.16_486.23				486.23		3.16	40	15	15	10	-0.468841	0.778816	1.47479	1.56175	-0.0439891	-0.820003	0.253627	-0.813007	-0.567447	-1.3557
3.16_456.184		C18H32O13	456.184	456.184	0.29	3.16	30	15	15	0	-0.876491	-0.940919	-0.59338	-0.884661	-0.652696	-0.438001	0.597976	1.40584	1.65059	0.731741
3.16_436.193				436.193		3.16	30	15	15	0	0.63804	-0.270674	1.10499	0.974751	0.516378	0.165933	0.826407	-1.31808	-1.59743	-1.04032
3.16_404.167				404.167		3.16	30	15	15	0	0.122379	0.940099	1.41646	0.723016	1.13962	-0.907045	-0.359557	-0.743211	-1.00702	-1.32474
3.16_372.106		C16H20O10	372.106	372.106	-0.3	3.16	30	15	15	0	-0.763734	0.232973	1.19337	1.6751	1.19598	-1.03746	-0.645166	-0.724132	-0.721649	-0.405283
3.16_290.174				290.174		3.16	30	15	15	0	0.191619	0.615376	0.335128	1.13144	1.61046	0.0927053	-0.360491	-1.01614	-1.14643	-1.45367
3.15_480.219				480.219		3.15	30	15	15	0	1.5322	0.742874	1.6271	0.207614	-0.494527	-1.10091	-0.202214	-0.503269	-0.796771	-1.0121
3.15_466.111				466.111		3.15	29	14	15	0	0.196826	1.11231	1.92406	0.554988	0.0864668	-1.21142	-0.140822	-0.767803	-1.08977	-0.664846
3.15_456.06				456.06		3.15	30	15	15	0	0.392077	0.0660669	1.64762	1.31904	-0.771635	-0.290689	0.309921	-0.0107549	-1.51673	-1.14492
3.15_322.162		C14H26O8	322.163	322.162	0.77	3.15	30	15	15	0	-1.30121	-0.73791	-0.144911	0.407448	-0.590075	-0.659567	0.377469	-0.379117	0.835006	2.19287
3.15_296.09				296.09		3.15	30	15	15	0	-0.450229	0.141105	2.4576	0.452585	0.396179	-0.16252	-0.885958	-0.330197	-0.539493	-1.07907
3.15_260.126				260.126		3.15	30	15	15	0	0.0499257	0.26312	0.588606	-0.361632	1.94238	-0.736672	0.775815	-0.709117	-1.73937	-0.0730567
3.14_612.132				612.132		3.14	30	15	15	0	0.285151	1.36313	1.47233	0.854908	0.20223	-0.714994	-0.410319	-0.621219	-0.991846	-1.43937
3.14_598.224				598.224		3.14	30	15	15	0	1.18803	0.555469	1.31509	0.789269	0.407612	-0.468496	-0.617841	-0.437215	-1.02141	-1.71051
3.14_483.173				483.173		3.14	27	12	15	0	-1.01795	0.605692	0.430466	2.12511	0.624307	-1.08964	0.216716	-0.607444	-0.451324	-0.835933
3.14_428.191				428.191		3.14	33	15	15	3	-0.402424	0.525118	0.787505	1.30482	1.701	-0.709264	-0.435053	-0.813701	-0.785506	-1.17249
3.14_408.105				408.105		3.14	30	15	15	0	0.388891	0.990911	2.16573	0.20117	-0.643008	-0.465695	-0.319247	-0.140814	-1.01077	-1.16717
3.14_282.075				282.075		3.14	30	15	15	0	-0.421692	1.58079	0.753684	1.49652	0.54255	-0.937437	-0.608781	-0.637164	-0.851241	-0.917231
3.14_204.1				204.1		3.14	34	15	15	4	-0.182654	0.685041	1.63022	1.18627	0.0498487	-0.536261	0.410004	-0.541199	-1.22216	-1.47911
3.13_730.267				730.267		3.13	30	15	15	0	-0.328219	0.104065	0.620562	0.853318	2.25729	-0.690638	-0.636867	-0.401611	-1.04467	-0.733233
3.13_454.057				454.057		3.13	30	15	15	0	0.492863	0.649227	2.07117	0.652403	-0.253253	-0.439326	-0.148375	-0.575671	-1.15103	-1.298
3.13_382.183				382.183		3.13	30	15	15	0	-0.402976	0.81497	0.581985	0.985147	1.90375	-0.58455	-0.603943	-0.76198	-0.759089	-1.17332
3.13_328.08				328.08		3.13	22	11	11	0	-0.631477	-0.255792	0.118874	0.778435	2.52577	-0.874125	-0.547254	-0.55872	-0.222859	-0.33285
3.13_265.095				265.095		3.13	30	15	15	0	0.181441	1.22817	1.0127	0.549323	1.06598	-0.162843	-0.189681	-0.767499	-1.24978	-1.6678
3.12_652.196				652.196		3.12	29	14	15	0	-0.29671	0.94439	-0.334525	0.50553	1.68851	-0.96489	0.199837	0.516709	-0.417939	-1.84091
3.12_601.198				601.198		3.12	30	15	15	0	0.373876	0.223674	1.36849	0.753297	1.23012	-1.03277	-0.425383	0.1666	-1.17208	-1.48582
3.12_584.21				584.21		3.12	30	15	15	0	0.52962	1.2491	1.1603	0.224039	1.1434	-1.34529	-0.689083	-0.403302	-0.572527	-1.29627
3.12_574.178				574.178		3.12	30	15	15	0	0.0379969	0.341292	2.18598	0.693154	0.452906	-1.0129	-0.807879	-0.0305494	-0.995521	-0.864482
3.12_538.203				538.203		3.12	30	15	15	0	-0.00696506	0.529658	1.50703	0.514669	1.51475	-0.977537	-0.465903	-0.360074	-0.981729	-1.2739
3.12_520.19				520.19		3.12	30	15	15	0	-0.0335187	0.322629	1.44158	0.0968682	1.92854	-0.860602	-0.570595	-0.39283	-0.943373	-0.988695
3.12_340.129				340.129		3.12	30	15	15	0	0.0410169	0.618103	1.49639	0.686695	1.44248	-0.857264	-0.70057	-0.640564	-0.964214	-1.12207
3.11_480.122				480.122		3.11	30	15	15	0	0.877379	-0.359075	1.46207	1.65914	-0.02259	-0.954296	-0.434046	-0.433944	-0.50196	-1.29268
3.11_358.131				358.131		3.11	29	14	15	0	0.345551	0.223229	2.05266	1.25189	-0.0911507	-0.787177	-0.651017	-0.450909	-0.985986	-0.907098
3.11_296.147		C12H24O8	296.147	296.147	0.12	3.11	30	15	15	0	0.393687	1.26526	1.22468	0.835468	0.820529	-0.703866	-0.584145	-0.99431	-1.12643	-1.13087
3.1_588.115				588.115		3.1	30	15	15	0	0.630985	-0.155455	2.16034	0.921211	-0.668684	-0.477893	-0.527673	0.0383438	-0.599272	-1.3219
3.1_588.114				588.114		3.1	30	15	15	0	0.722097	0.360205	1.89215	0.849056	0.220227	-0.703146	-0.464975	-0.371178	-1.16637	-1.33807
3.1_550.225				550.225		3.1	30	15	15	0	-1.15559	-0.388568	0.475069	2.047	1.09096	-1.22336	-0.596858	-0.148908	0.0674547	-0.167208
3.1_548.12				548.12		3.1	30	15	15	0	0.00212222	-0.283575	1.9072	1.0708	1.07108	-0.793962	-1.03529	-0.496324	-0.714528	-0.727513
3.1_504.179				504.179		3.1	30	15	15	0	-0.1474	1.45698	-0.545359	1.21706	1.39591	-0.595061	-0.0540961	-0.620756	-1.3414	-0.765873
3.1_504.132				504.132		3.1	30	15	15	0	-0.000363322	-0.108047	2.05296	0.83689	0.999217	-0.815713	-1.10789	-0.480044	-0.73045	-0.646557
3.1_474.172				474.172		3.1	18	10	8	0	<LOD	-1.25355	-0.0471638	1.76388	0.528178	<LOD	<LOD	-0.836378	0.32538	-0.480342
3.1_453.183				453.183		3.1	30	15	15	0	2.31338	0.30034	0.250132	0.430105	0.068221	-0.423279	-0.79501	-0.329551	-0.298826	-1.51551
3.1_436.194				436.194		3.1	30	15	15	0	-0.404233	0.85308	0.808465	1.37331	0.935187	-0.428681	-0.274182	-0.559008	-0.294891	-2.00905
3.1_425.074				425.074		3.1	30	15	15	0	-0.241862	0.228569	1.02011	1.92963	0.98084	-0.747735	-0.531927	-0.873936	-0.913431	-0.850258
3.1_328.11				328.11		3.1	30	15	15	0	-0.73395	0.281201	0.909197	1.77445	1.12905	-0.974331	-0.807751	0.00447817	-0.41803	-1.16432
3.1_304.153				304.153		3.1	30	15	15	0	-0.573152	0.457066	0.99615	1.45494	1.4086	-0.943789	-0.755331	-0.356713	-0.421709	-1.26606
3.1_182.021				182.021		3.1	31	15	13	3	-1.0019	-0.587132	1.38527	0.841559	0.707027	-1.15785	-0.770609	-0.0879311	-0.74973	1.4213
3.09_796.239				796.239		3.09	30	15	15	0	-0.759567	0.0837214	-0.0840513	0.0559555	2.69637	-0.467257	-0.252532	-0.69771	-0.604679	0.029747
3.09_728.252				728.252		3.09	30	15	15	0	-0.801265	0.0185867	0.528879	0.465928	2.45132	-0.644136	-0.400815	-0.891197	-0.69349	-0.033806
3.09_682.245				682.245		3.09	30	15	15	0	-0.744841	-0.0463878	0.49465	0.351887	2.52179	-0.681776	-0.479182	-0.796321	-0.621732	0.00190926
3.09_504.181				504.181		3.09	30	15	15	0	-0.591488	1.45671	0.488448	0.552701	1.25129	-1.30733	-0.240026	0.339971	-0.412012	-1.53827
3.09_480.219				480.219		3.09	30	15	15	0	0.88346	1.28378	1.31683	0.308601	0.342002	-0.734528	-0.624276	-0.201657	-0.873604	-1.70061
3.09_444.087				444.087		3.09	30	15	15	0	0.322448	0.0629055	1.24852	1.39573	1.09983	-0.94586	-0.970286	-0.511202	-1.41211	-0.289983
3.09_434.213				434.213		3.09	30	15	15	0	-0.111794	-0.202727	1.36645	0.967392	1.25228	-1.19582	-1.21731	0.444386	-0.0959459	-1.20692
3.09_393.09				393.09		3.09	30	15	15	0	1.4833	-0.050443	1.67179	0.894937	-0.203025	-0.91499	-0.815413	-0.420508	-1.07506	-0.570588
3.09_390.188				390.188		3.09	30	15	15	0	-0.246532	0.828355	1.4109	1.19866	0.755089	-0.863182	-0.444752	-0.330081	-0.635021	-1.67343
3.09_364.115				364.115		3.09	34	15	15	4	0.267561	-0.113609	1.57241	5.12888e-05	1.50038	-1.10652	-0.484607	0.220328	-1.62145	-0.234541
3.09_326.156				326.156		3.09	30	15	15	0	-0.510363	0.12635	0.910278	2.03237	1.0399	-0.597266	-0.537893	-0.72824	-0.84225	-0.892889
3.09_312.085				312.085		3.09	30	15	15	0	-0.0426823	0.224414	1.91682	1.58842	-0.18829	-1.12574	-0.711879	-0.612302	-0.434575	-0.614196
3.09_290.173				290.173		3.09	30	15	15	0	0.159994	1.45146	0.878766	1.0104	0.931961	-0.734601	-0.644928	-0.717037	-1.10556	-1.23045
3.08_476.152				476.152		3.08	30	15	15	0	0.197402	0.0248959	0.420128	2.55212	-0.44597	-0.557234	-0.602764	7.4834e-05	-0.533577	-1.05507
3.08_432.197				432.197		3.08	35	15	15	5	-0.199279	0.0414909	1.78232	1.3421	0.519804	-1.08261	-0.82239	0.289713	-0.818134	-1.05301
3.08_118.062				118.062		3.08	30	15	15	0	0.702666	0.376012	2.11585	-0.189886	0.473521	-0.723705	-0.652707	0.195905	-1.14976	-1.14789
3.07_730.264				730.264		3.07	30	15	15	0	-0.459014	0.398852	0.831292	0.455897	2.24545	-0.622545	-0.264516	-0.828313	-0.84731	-0.909791
3.07_568.142				568.142		3.07	30	15	15	0	-0.483696	0.728819	1.86448	1.04459	0.709299	-0.998453	-0.603892	-0.497623	-0.875538	-0.887986
3.07_474.083				474.083		3.07	30	15	15	0	0.662352	-0.0913102	1.98081	0.738101	0.518878	-0.910892	-0.187885	-0.338878	-1.0755	-1.29567
3.07_472.156				472.156		3.07	30	15	15	0	-1.17436	0.0251384	0.151009	1.68721	1.67714	-1.20538	-0.622692	-0.169665	-0.166619	-0.201787
3.07_428.188				428.188		3.07	35	15	15	5	-0.615006	0.232278	1.18319	1.58758	1.25278	-0.988171	-0.354977	-0.618186	-0.537217	-1.14227
3.07_404.168				404.168		3.07	30	15	15	0	-0.928851	0.0452636	0.648334	1.91062	1.27423	-1.25948	-0.726451	-0.287555	-0.425902	-0.250214
3.07_382.183				382.183		3.07	30	15	15	0	-0.512842	0.893197	-0.65235	0.706587	2.15655	-0.808058	0.299695	-0.366791	-0.774148	-0.941837
3.07_344.111				344.111		3.07	30	15	15	0	-0.461487	1.04455	1.05771	1.28261	0.685022	-0.0803065	-0.116213	-0.525524	-1.41885	-1.46751
3.07_173.105				173.105		3.07	40	15	15	10	-0.746697	0.289144	1.14788	1.0085	1.29713	-1.7972	0.0742946	0.188742	-0.698614	-0.763181
3.07_169.045				169.045		3.07	40	15	15	10	-0.51055	-0.0644597	-0.476006	2.01459	1.58717	-0.789842	0.0870059	-0.311644	-0.662511	-0.873756
3.07_131.095				131.095		3.07	35	15	15	5	-0.388153	0.219825	1.97162	0.519169	1.1465	-1.25323	-0.228784	-0.153726	-0.954278	-0.878936
3.07_125.055				125.055		3.07	40	15	15	10	-0.463463	0.05743	-0.446828	2.18371	1.40361	-0.692853	-0.180604	-0.279722	-0.756017	-0.825264
3.06_644.23				644.23		3.06	30	15	15	0	-0.176008	0.622559	0.533714	1.19517	1.50464	-0.635783	-0.422156	-0.18805	-0.501487	-1.9326
3.06_450.116				450.116		3.06	30	15	15	0	1.72603	0.0494183	1.51081	0.676022	-0.267923	-0.397066	-0.54154	-0.531536	-1.11035	-1.11387
3.06_323.1				323.1		3.06	30	15	15	0	-1.08382	-0.731577	-0.498111	0.0413056	-0.152461	-0.994803	-0.503096	0.696875	1.82038	1.40531
3.06_322.163		C14H26O8	322.163	322.163	-0.23	3.06	30	15	15	0	-0.803154	-0.83704	-0.76524	-0.688381	-0.904533	-0.199487	0.259243	0.761584	1.44192	1.73508
3.05_584.209				584.209		3.05	30	15	15	0	0.697486	0.73348	1.6953	0.832691	0.183822	-0.731876	-0.601519	-0.206671	-1.14798	-1.45474
3.05_582.119				582.119		3.05	30	15	15	0	-0.646065	0.855914	1.03741	1.08567	1.47176	-0.992312	-0.156578	-0.698082	-0.888817	-1.06889
3.05_561.09				561.09		3.05	30	15	15	0	-0.691758	0.487848	0.752313	1.41532	1.63347	-0.768342	-0.166273	-0.751432	-0.819146	-1.09201
3.05_546.135				546.135		3.05	30	15	15	0	-0.582538	0.606983	0.808325	1.4504	1.47181	-0.861878	-0.11777	-0.781194	-0.914355	-1.07978
3.05_538.202				538.202		3.05	15	6	9	0	0.651749	-0.278934	1.50354	1.43696	<LOD	-0.899761	-0.812528	0.177775	-0.679049	-1.09975
3.05_532.137				532.137		3.05	30	15	15	0	-0.731123	0.759681	0.747177	1.36138	1.52925	-0.824383	-0.175762	-0.722015	-0.881745	-1.06246
3.05_530.16				530.16		3.05	30	15	15	0	-0.709416	0.800053	0.80965	1.20256	1.57636	-0.984781	-0.103932	-0.719106	-0.832609	-1.03879
3.05_514.142				514.142		3.05	30	15	15	0	-0.492307	0.342919	1.55391	1.70045	0.533953	-1.07974	-0.252734	-0.626686	-0.751748	-0.928015
3.05_504.142				504.142		3.05	30	15	15	0	-0.685034	0.781834	0.76584	1.37165	1.47843	-0.860293	-0.162484	-0.704929	-0.865644	-1.11937
3.05_486.131				486.131		3.05	30	15	15	0	-0.637197	0.888984	0.34055	1.46222	1.57784	-0.747841	-0.184912	-0.808201	-0.83484	-1.05661
3.05_479.164				479.164		3.05	30	15	15	0	0.458196	0.495819	1.50606	1.36879	0.535197	-1.06065	-0.56608	-0.580327	-1.01755	-1.13946
3.05_462.174				462.174		3.05	30	15	15	0	-0.638813	0.528784	1.22834	1.59845	1.06968	-0.917346	-0.371126	-0.662433	-0.889811	-0.945723
3.05_454.142				454.142		3.05	30	15	15	0	-0.461621	0.457517	1.64833	1.31069	0.890311	-1.12306	-0.364453	-0.529372	-0.867863	-0.960476
3.05_452.144				452.144		3.05	30	15	15	0	-0.423438	0.504846	1.46271	1.43807	0.975157	-1.03063	-0.479817	-0.541502	-0.895931	-1.00946
3.05_424.177				424.177		3.05	29	15	14	0	0.345812	0.276285	1.96816	0.740258	0.390503	-0.611778	-0.393875	-0.00720535	-1.22486	-1.4833
3.05_416.168				416.168		3.05	30	15	15	0	-0.674965	0.555267	1.22068	1.55706	1.10952	-0.928741	-0.358824	-0.648645	-0.887156	-0.944189
3.04_588.113				588.113		3.04	30	15	15	0	0.00493507	0.540728	1.64703	1.64563	-0.0616448	-0.699421	-0.429339	-0.464186	-1.02239	-1.16134
3.04_448.156				448.156		3.04	30	15	15	0	-0.695803	-0.481203	-0.51302	-0.333512	0.85783	-0.75511	-0.703536	1.71686	1.62623	-0.718745
3.04_436.193				436.193		3.04	30	15	15	0	-0.409171	-0.266059	2.44277	1.15354	-0.359338	-0.550075	-0.52113	-0.406368	-0.479204	-0.60496
3.04_378.11				378.11		3.04	30	15	15	0	-0.918432	0.418391	0.711909	2.11814	0.88573	-0.896403	-0.467414	-0.725479	-0.665224	-0.461219
3.04_308.147				308.147		3.04	30	15	15	0	-0.775222	0.18666	1.23825	1.90725	0.819598	-0.98975	-0.657346	-0.390052	-0.843927	-0.495471
3.03_522.207				522.207		3.03	25	12	13	0	0.471218	0.225185	1.32569	1.24436	0.00559295	-0.654573	0.896795	-1.02644	-1.38602	-1.1018
3.03_454.056				454.056		3.03	30	15	15	0	0.0232935	0.547582	1.73313	0.0513782	1.28417	-1.1787	-0.171914	-0.0271786	-0.948196	-1.31356
3.03_407.064				407.064		3.03	30	15	15	0	-0.833327	0.16348	0.770354	1.95092	1.2284	-0.985789	-0.400082	-0.535319	-0.799687	-0.55895
3.03_352.172				352.172		3.03	30	15	15	0	0.0575719	0.464345	0.936147	2.09647	-0.590775	-1.29884	-1.14228	-0.329141	-0.241048	0.0475514
3.03_260.126				260.126		3.03	33	15	15	3	0.481152	1.56717	1.10123	0.602737	0.421354	-0.489072	-0.436695	-0.469742	-1.23203	-1.54612
3.02_456.069				456.069		3.02	30	15	15	0	0.841938	0.893207	1.47909	1.01934	-0.0397012	-0.828386	-0.387596	-0.681727	-0.743375	-1.55279
3.01_508.177				508.177		3.01	30	15	15	0	-1.05965	-0.0587744	0.99398	2.063	0.309575	-1.32085	-0.368905	0.400361	-0.350354	-0.608383
3.01_446.177				446.177		3.01	28	13	15	0	0.107968	-1.12305	0.289694	1.83453	1.32155	-1.34033	-0.588299	-0.527429	-0.221922	0.247287
3.01_440.189				440.189		3.01	30	15	15	0	-0.872369	0.197678	0.646992	2.14946	0.6436	-1.12037	-0.100149	0.12767	-0.653661	-1.01886
3.01_434.214				434.214		3.01	30	15	15	0	-1.05022	0.0393235	0.625084	1.79541	1.26672	-1.34393	-0.736946	0.156512	-0.275417	-0.476544
3.01_430.156				430.156		3.01	30	15	15	0	-0.374573	0.158173	1.33573	1.94226	0.517977	-1.17994	-0.511328	-0.376151	-0.944906	-0.567243
3.01_394.183				394.183		3.01	30	15	15	0	-0.911686	0.278914	0.690246	2.16985	0.67824	-0.906426	-0.226984	-0.0324517	-0.69826	-1.04144
3.01_173.105				173.105		3.01	40	15	15	10	-1.64416	-0.458684	0.603914	0.924046	0.776115	-1.74945	-0.244435	0.507503	0.818237	0.466917
2_921.194				921.194		2	30	15	15	0	-0.428226	0.555021	1.32757	1.79326	0.536863	-0.669843	-0.487293	-0.576538	-0.779758	-1.27105
2_629.198				629.198		2	28	13	15	0	0.317736	-0.593242	1.00552	1.79876	1.10214	-1.18263	-0.975224	-0.400185	-0.551346	-0.521523
2_629.046				629.046		2	30	15	15	0	-0.252028	0.851351	0.0852889	0.749287	1.90383	-0.49342	0.368653	-0.923454	-0.857233	-1.43228
2_600.093				600.093		2	30	15	15	0	-0.480323	0.867001	0.925226	0.858597	1.64406	-0.701692	-0.0919777	-0.857395	-0.812372	-1.35112
2_579.064				579.064		2	30	15	15	0	-0.383993	0.760672	0.705784	1.38218	1.36758	-0.490094	-0.108512	-0.886436	-0.855215	-1.49197
2_564.108				564.108		2	39	15	15	9	-0.344584	0.839541	0.874062	1.54299	1.02819	-0.653642	-0.172838	-0.754614	-0.892142	-1.46696
2_550.112				550.112		2	30	15	15	0	-0.432674	0.894854	0.57752	1.30545	1.39544	-0.526754	0.00191859	-0.824538	-0.87101	-1.52021
2_548.135				548.135		2	30	15	15	0	-0.569193	0.632675	1.01542	1.52206	1.14467	-0.843797	-0.306051	-0.412709	-0.731782	-1.45129
2_534.065				534.065		2	30	15	15	0	-0.352804	0.720211	0.996146	1.46298	1.14885	-0.631419	-0.236666	-0.763382	-0.927089	-1.41683
2_532.116				532.116		2	30	15	15	0	-0.513995	0.146374	1.66925	1.73957	0.0432702	-0.866037	-0.221903	-0.0879031	-0.585813	-1.32282
2_522.116				522.116		2	30	15	15	0	-0.418315	0.833901	0.662189	1.31306	1.41395	-0.501274	-0.0764718	-0.847373	-0.905928	-1.47373
2_504.105				504.105		2	30	15	15	0	-0.424732	0.961353	0.334673	1.28874	1.53004	-0.502235	-0.031687	-0.905692	-0.828861	-1.42161
2_497.138				497.138		2	30	15	15	0	0.755772	0.507594	1.70572	0.898537	0.0633783	-0.501915	-0.398639	-0.276273	-1.08523	-1.66895
2_480.148				480.148		2	30	15	15	0	-0.434973	0.547776	1.29722	1.70498	0.719322	-0.73764	-0.3466	-0.641538	-0.82542	-1.28313
2_472.116				472.116		2	30	15	15	0	-0.446758	0.4741	1.93819	1.11298	0.607249	-0.745072	-0.427995	-0.444639	-0.772203	-1.29586
2_470.119				470.119		2	30	15	15	0	-0.432539	0.428285	1.79549	1.29177	0.603059	-0.872521	-0.358266	-0.364128	-0.75864	-1.33251
2_434.142				434.142		2	30	15	15	0	-0.444387	0.544498	1.29633	1.69105	0.742897	-0.739964	-0.330153	-0.649614	-0.822901	-1.28776
2_312.141				312.141		2	31	11	15	5	<LOD	-1.61807	-0.0519485	1.67689	0.528534	-1.06665	-0.287146	0.511404	-0.462538	0.769523
2.99_556.178				556.178		2.99	30	15	15	0	1.9322	0.350614	1.36017	0.242816	-0.725116	-0.281189	-0.314542	-0.388488	-1.01263	-1.16383
2.99_492.182				492.182		2.99	30	15	15	0	-0.921091	0.394556	1.09556	1.60913	1.08953	-1.37198	-0.561072	-0.244497	-0.255075	-0.835057
2.99_398.178				398.178		2.99	17	0	7	10	<LOD	<LOD	<LOD	<LOD	<LOD	<LOD	<LOD	1.12066	-0.319322	-0.801341
2.99_320.147				320.147		2.99	27	14	13	0	-0.671268	0.502396	1.06961	2.08446	0.373353	-1.22226	-0.387656	-0.56424	-0.544145	-0.64025
2.98_484.214				484.214		2.98	29	14	15	0	-0.238234	0.164769	1.93762	1.33337	0.144606	-1.08154	-0.502916	0.122493	-1.22094	-0.659235
2.98_388.172				388.172		2.98	30	15	15	0	-0.460786	0.0591096	1.32892	0.391737	0.451538	-0.829128	-0.497226	1.78604	-1.27207	-0.958133
2.98_336.142				336.142		2.98	30	15	15	0	0.075211	0.967805	1.52928	0.968727	-0.00260324	-0.50412	0.289058	-0.472787	-1.1456	-1.70497
2.97_492.131				492.131		2.97	27	15	12	0	-0.0110778	-0.711895	1.1508	-0.278668	1.79451	-0.939706	-1.00074	-0.72499	-0.413782	1.13555
2.97_482.105				482.105		2.97	30	15	15	0	0.641628	0.159521	1.2274	0.375178	1.26728	-0.611613	0.371943	-0.394856	-1.39342	-1.64306
2.97_452.226				452.226		2.97	30	15	15	0	-0.0742988	0.5839	0.851982	0.897003	1.83859	-0.867376	-0.87011	-0.621407	-0.459129	-1.27916
2.97_384.198				384.198		2.97	37	14	14	9	-0.593684	-0.0794562	2.54757	0.675533	-0.0071613	-0.636503	0.0262156	-0.473194	-0.739732	-0.719583
2.96_466.168				466.168		2.96	30	15	15	0	-0.808149	0.279254	1.31774	1.46124	1.27121	-0.814372	-0.56988	-0.505972	-0.493729	-1.13734
2.96_302.136				302.136		2.96	30	15	15	0	-0.32191	0.396651	1.4966	1.30343	0.809237	-1.07337	-0.846403	0.0242377	-0.312426	-1.47605
2.96_296.09				296.09		2.96	30	15	15	0	-0.489504	0.437076	1.83805	0.815578	0.859561	-0.511688	-0.620048	-0.168	-0.457052	-1.70397
2.96_180.062				180.062		2.96	30	15	15	0	0.993745	0.124872	1.69591	-0.395693	1.327	-0.908616	-0.797526	-0.914403	-0.193608	-0.931678
2.95_434.177				434.177		2.95	29	15	14	0	0.316558	0.587857	1.48653	1.13491	0.429313	-1.21838	-0.468079	0.0610681	-0.690041	-1.63972
2.94_388.136				388.136		2.94	30	15	15	0	1.45434	0.226999	1.38567	-0.118436	1.00415	-0.787869	-0.639774	-0.226062	-1.4385	-0.860527
2.94_352.173		C15H28O9	352.173	352.173	0.33	2.94	30	15	15	0	-0.898048	-0.554302	0.00486671	1.37221	1.91571	-0.607707	-1.08438	-0.399418	-0.42085	0.671915
2.94_251.079				251.079		2.94	30	15	15	0	-2.26239	-0.457971	-0.128856	0.600998	0.261486	-0.123972	1.22444	0.484349	1.03633	-0.634413
2.93_604.108				604.108		2.93	30	15	15	0	0.134577	0.187793	2.3258	0.21748	0.174462	-0.719449	-0.393216	0.366789	-1.24961	-1.04463
2.93_448.122				448.122		2.93	25	10	15	0	-0.790809	-0.209876	-0.176557	-0.699374	-0.789958	2.34577	0.949325	-0.766961	-0.234559	0.372995
2.93_408.199				408.199		2.93	23	11	12	0	0.136946	0.935607	1.50566	0.887857	0.914346	-0.964772	-0.831072	-0.674364	-0.558945	-1.35126
2.93_339.13				339.13		2.93	30	15	15	0	-0.368645	0.169584	1.95557	1.56688	0.0771329	-0.683191	-0.65639	-0.343794	-0.685475	-1.03167
2.92_490.168				490.168		2.92	30	15	15	0	-0.735578	0.317585	0.903124	1.88794	1.0694	-0.924183	-0.170031	-0.58644	-0.714186	-1.04763
2.92_472.215				472.215		2.92	15	0	15	0	<LOD	<LOD	<LOD	<LOD	<LOD	-1.53988	-0.468982	0.533259	0.871506	0.604098
2.91_492.182				492.182		2.91	30	15	15	0	-0.609344	-0.455867	-0.0117262	0.955437	2.04038	-1.55103	-0.682022	-0.324421	0.606307	0.0322832
2.91_356.111				356.111		2.91	30	15	15	0	1.23893	0.253801	1.92385	0.377795	0.177632	-0.885459	-0.329462	-0.778931	-1.17526	-0.802893
2.91_340.172				340.172		2.91	35	15	15	5	-0.497608	1.04862	1.28227	1.50933	0.534763	-0.691943	-0.314024	-0.675723	-1.10173	-1.09395
2.91_328.08				328.08		2.91	29	14	15	0	-0.932392	-0.415955	0.363037	1.28977	2.12607	-0.924998	-0.75325	-0.357562	-0.11542	-0.279291
2.9_516.147				516.147		2.9	30	15	15	0	-0.859943	0.518473	0.885087	1.7037	1.2199	-0.938362	-0.358558	-0.415691	-0.657849	-1.09676
2.9_488.207				488.207		2.9	27	14	13	0	-0.563613	-0.218839	0.337183	2.20599	1.31864	-0.639664	-0.505852	-0.642578	-0.601659	-0.689615
2.9_448.157				448.157		2.9	30	15	15	0	-0.451485	0.686638	1.21917	1.66692	0.784392	-0.832864	-0.362023	-0.614909	-0.897415	-1.19842
2.9_438.129				438.129		2.9	30	15	15	0	-0.172574	0.327764	1.6144	1.6747	0.441294	-0.864725	-0.525218	-0.514367	-0.934813	-1.04646
2.9_422.178				422.178		2.9	39	15	15	9	-0.152037	1.0202	1.26876	1.50989	0.499023	-0.763043	-0.7986	-0.414903	-0.922642	-1.24665
2.9_402.152				402.152		2.9	30	15	15	0	-0.487911	0.65154	1.15668	1.71757	0.831513	-0.810875	-0.346295	-0.694727	-0.83144	-1.18605
2.9_131.095				131.095		2.9	37	12	15	10	0.0309086	-0.897939	1.84246	-0.70125	-0.630739	-1.13417	-0.458947	1.28939	0.845417	-0.185129
2.89_526.168				526.168		2.89	27	13	14	0	0.530901	0.763508	1.59329	-0.189038	1.38304	-0.87504	-0.969286	-0.397601	-0.704897	-1.13487
2.89_440.186				440.186		2.89	30	15	15	0	-0.944954	-0.0862165	0.449247	2.31828	0.645586	-1.15175	-0.56526	-0.0779786	0.0821782	-0.669127
2.89_426.063				426.063		2.89	30	15	15	0	0.287922	1.3005	1.39504	0.403102	0.901557	-0.361995	-0.626943	-0.790177	-1.31888	-1.19013
2.89_212.032				212.032		2.89	30	15	15	0	-0.68531	0.322124	1.72033	1.28267	0.599952	-1.36542	-0.560907	-0.28202	-1.09512	0.0637057
2.88_466.167				466.167		2.88	30	15	15	0	-0.982883	0.361275	0.69106	1.90157	1.19659	-0.854675	-0.145456	-0.646058	-0.599999	-0.921429
2.88_383.122				383.122		2.88	29	14	15	0	-0.905422	0.235738	1.35081	1.27154	1.19455	-1.56346	-0.694767	-0.30235	-0.474427	-0.112214
2.87_817.277				817.277		2.87	28	14	14	0	-0.594614	0.0238073	0.561456	2.24254	1.04651	-0.672335	-0.486714	-0.639513	-0.664228	-0.816915
2.87_577.088				577.088		2.87	30	15	15	0	-0.812025	0.588102	-0.0501585	1.18223	2.01073	-0.930736	0.122016	-0.664599	-0.419573	-1.02599
2.87_548.134				548.134		2.87	29	15	14	0	-0.766515	0.336989	0.500994	1.68253	1.62576	-0.82984	-0.252641	-0.656796	-0.671214	-0.969276
2.87_527.105				527.105		2.87	30	15	15	0	-0.809758	0.395936	0.440655	1.71886	1.57443	-0.695744	-0.224999	-0.663679	-0.669647	-1.06605
2.87_512.148				512.148		2.87	30	15	15	0	-0.674255	0.194924	0.868621	1.7756	1.3404	-0.801945	-0.258777	-0.649402	-0.723866	-1.0713
2.87_498.157				498.157		2.87	30	15	15	0	-0.84438	0.292427	0.470712	1.81286	1.50847	-0.752805	-0.19661	-0.648731	-0.673006	-0.968937
2.87_498.144				498.144		2.87	30	15	15	0	-1.08767	0.0108785	0.565657	1.77484	1.48902	-1.0488	-0.00337823	-0.529061	-0.407509	-0.763989
2.87_496.176				496.176		2.87	36	15	15	6	-0.811766	0.282106	0.541379	1.81601	1.48251	-0.830488	-0.307226	-0.564265	-0.608033	-1.00022
2.87_482.106				482.106		2.87	30	15	15	0	-0.393695	0.320032	0.652587	1.82023	1.40225	-0.899529	-0.422382	-0.840705	-0.817864	-0.820925
2.87_480.157				480.157		2.87	30	15	15	0	-0.471682	0.260649	1.13361	2.0674	0.555499	-0.915281	-0.3679	-0.531079	-0.65575	-1.07547
2.87_470.158				470.158		2.87	29	15	14	0	-0.771506	0.263122	0.287157	1.87374	1.56601	-0.729771	-0.28995	-0.613196	-0.651223	-0.93438
2.87_452.145				452.145		2.87	23	12	11	0	-0.61224	0.364801	0.648552	1.96027	1.06311	-0.855062	-0.501804	-0.0322396	-0.87071	-1.16468
2.87_450.119				450.119		2.87	30	15	15	0	1.05625	1.05913	1.69102	-0.145769	-0.614857	-0.119498	0.172529	-0.645366	-1.35617	-1.09727
2.87_445.178				445.178		2.87	39	15	15	9	0.0693087	0.181779	1.21094	1.86844	0.717056	-0.884644	-0.569213	-0.58609	-0.891308	-1.11626
2.87_428.189				428.189		2.87	34	15	15	4	-0.677216	0.170944	0.70098	2.06616	1.14241	-0.757315	-0.404212	-0.645523	-0.700475	-0.895756
2.87_420.158				420.158		2.87	30	15	15	0	-0.596751	0.127341	1.02243	2.07161	0.862669	-0.818951	-0.483885	-0.601005	-0.675859	-0.907598
2.87_418.157				418.157		2.87	30	15	15	0	-0.566486	0.181482	1.13164	1.97647	0.87475	-0.821854	-0.549412	-0.56024	-0.748348	-0.918003
2.87_382.184				382.184		2.87	30	15	15	0	-0.68681	0.214817	0.599033	2.04698	1.22145	-0.734515	-0.397367	-0.638711	-0.723746	-0.901137
2.87_306.078				306.078		2.87	29	14	15	0	-0.0351014	-0.22218	1.63914	0.64398	-0.470216	-0.881833	-0.686435	1.69889	-1.03027	-0.655981
2.87_214.97				214.97		2.87	40	15	15	10	-0.0352789	-0.464027	2.82119	-0.31179	-0.273308	-0.422217	-0.330583	-0.460121	-0.172739	-0.351129
2.86_664.256				664.256		2.86	28	15	13	0	0.08881	0.60613	2.00269	0.934391	0.441743	-0.567913	-0.68894	-0.679417	-1.03323	-1.10427
2.86_472.158				472.158		2.86	30	15	15	0	0.00584182	0.0426951	1.13116	2.15128	0.384107	-1.05606	-0.76586	-0.764831	-0.46482	-0.663517
2.86_444.073				444.073		2.86	30	15	15	0	0.300725	-0.0554073	2.31322	0.807984	0.0645126	-0.628529	-0.289973	-0.392085	-1.1538	-0.966644
2.85_510.154				510.154		2.85	30	15	15	0	-0.968895	0.603348	0.763695	1.6115	1.3367	-0.838987	-0.382499	-0.284747	-0.689815	-1.15029
2.85_462.119				462.119		2.85	30	15	15	0	0.113427	0.245752	2.20462	1.09023	0.0047228	-0.705994	-0.580178	-0.459857	-0.987968	-0.924756
2.85_450.209				450.209		2.85	30	15	15	0	0.170831	0.549474	1.38906	0.795375	1.43459	-0.97945	-0.760546	-0.529253	-0.824955	-1.24512
2.85_448.101				448.101		2.85	29	15	14	0	1.44117	-0.144833	1.31864	-0.413338	1.34399	-0.776575	-0.148725	-1.16781	-0.992913	-0.459601
2.85_438.173				438.173		2.85	30	15	15	0	-0.230645	0.497887	1.76726	1.4954	0.412402	-0.85325	-0.578068	-0.786352	-0.833682	-0.890958
2.85_258.11				258.11		2.85	30	15	15	0	0.113519	1.12656	1.44065	0.955493	0.59632	-0.742061	-0.669246	-0.301621	-1.02511	-1.49451
2.84_424.185				424.185		2.84	29	15	14	0	-0.604533	-0.33123	1.61494	0.299206	1.08494	-1.60152	-0.729604	1.05109	-0.657578	-0.125702
2.83_380.167				380.167		2.83	30	15	15	0	0.854588	0.14657	1.79473	1.11711	-0.651383	-0.755607	0.072033	-0.248194	-1.12553	-1.20431
2.83_354.151				354.151		2.83	30	7	13	10	-0.806696	-0.0455646	-0.0612072	2.54758	<LOD	-0.195188	-0.186816	-0.304136	-0.819275	-0.128693
2.83_328.08				328.08		2.83	29	14	15	0	-0.774383	-0.52021	0.172951	1.54882	1.96736	-0.943116	-0.871455	-0.263116	0.0178186	-0.33467
2.83_282.074				282.074		2.83	30	15	15	0	1.68746	0.825644	0.850871	-0.546967	0.343573	0.522024	-0.324	-0.777516	-1.19957	-1.38152
2.83_160.073				160.073		2.83	40	15	15	10	-0.603933	-0.155975	0.0904355	0.138413	0.429843	-0.755256	-0.733994	-0.728578	-0.266988	2.58603
2.82_474.085				474.085		2.82	30	15	15	0	0.481434	0.17083	1.98061	1.00525	0.411437	-0.692284	-0.450034	-0.69731	-1.22005	-0.989883
2.82_466.167				466.167		2.82	30	15	15	0	-1.39331	0.398306	0.965304	1.8	0.855246	-0.901079	0.105534	-0.5348	-0.491175	-0.804024
2.82_456.104				456.104		2.82	40	15	15	10	-0.864515	-0.664913	-0.53199	-0.714955	-0.847391	0.807553	1.67097	1.60131	0.0767629	-0.532827
2.82_425.981				425.981		2.82	30	15	15	0	-0.964266	-0.138234	0.329186	1.12742	1.12269	-1.32494	-0.942417	-0.791597	0.124234	1.45793
2.81_482.105				482.105		2.81	30	15	15	0	1.08354	0.869765	1.70065	0.0599662	0.392045	-0.680742	-0.653711	-0.308114	-1.22624	-1.23716
2.81_388.136				388.136		2.81	30	15	15	0	0.571808	0.531209	1.5277	0.800435	0.957031	-1.30239	-1.1408	-0.582871	-0.338066	-1.02406
2.81_344.11				344.11		2.81	30	15	15	0	0.981934	0.864308	1.12119	1.2206	-0.621652	-0.145614	-0.563901	-0.103894	-1.28707	-1.4659
2.81_208.071				208.071		2.81	30	15	15	0	-0.028607	0.353358	1.70699	1.25952	0.773986	-1.3302	-0.920089	-0.46219	-0.553044	-0.799724
2.8_547.15				547.15		2.8	30	15	15	0	-1.18541	0.0479514	0.499857	1.43988	1.61738	-1.42578	-0.498278	0.0979212	0.00870381	-0.602221
2.8_479.163				479.163		2.8	30	15	15	0	-0.885167	0.283019	1.20788	1.91945	0.695895	-1.12124	-0.402572	-0.319217	-0.550838	-0.827214
2.8_469.134				469.134		2.8	30	15	15	0	-0.697314	0.0722976	1.57983	1.77735	0.537997	-1.13958	-0.647953	-0.220501	-0.61239	-0.649729
2.8_462.173				462.173		2.8	30	15	15	0	-0.385809	0.996326	0.98533	1.01272	1.31119	-0.992201	-0.485451	-0.0288656	-1.13596	-1.27727
2.8_433.157				433.157		2.8	33	15	15	3	-0.861727	0.252652	1.25463	1.92175	0.643111	-1.14015	-0.453305	-0.290876	-0.515583	-0.810502
2.8_426.173				426.173		2.8	30	15	15	0	-0.260646	0.176319	2.15136	0.592929	0.951366	-0.922207	-0.335412	-0.693104	-1.14159	-0.51902
2.8_415.033				415.033		2.8	27	15	12	0	0.513601	1.24413	0.804109	0.418714	1.38895	-0.42931	-0.553051	-1.29512	-1.24784	-0.844181
2.8_386.082				386.082		2.8	30	15	15	0	-0.439341	-0.349649	-0.37222	-0.299901	2.8227	-0.36973	-0.497662	-0.1464	-0.279595	-0.0681983
2.8_340.173				340.173		2.8	35	15	15	5	-0.35328	0.42461	1.71049	1.47334	0.315201	-0.540481	-0.0997663	-0.610698	-0.900707	-1.41871
2.8_316.116		C14H20O8	316.116	316.116	-0.2	2.8	30	15	15	0	0.458048	0.950302	1.26804	0.76486	1.08849	-0.541426	-0.627424	-1.15398	-1.2703	-0.936606
2.79_510.155				510.155		2.79	30	15	15	0	-0.745937	0.4181	0.881485	1.86626	1.01904	-1.06095	-0.339736	-0.316253	-0.59022	-1.13179
2.79_396.163				396.163		2.79	30	15	15	0	-0.877308	0.130239	1.01551	1.96436	0.920442	-1.11246	-0.172574	-0.570857	-0.504784	-0.792566
2.78_512.131				512.131		2.78	30	15	15	0	-0.598521	0.451242	0.723825	1.76265	1.36127	-0.828301	-0.491084	-0.589683	-0.702425	-1.08897
2.78_466.112				466.112		2.78	30	15	15	0	1.58409	0.119369	1.68806	0.476984	0.085015	-0.772905	-0.492448	-0.695791	-1.20028	-0.7921
2.78_442.168				442.168		2.78	30	15	15	0	-0.605043	0.273192	1.26394	1.80809	0.883498	-0.808333	-0.316463	-0.674194	-0.77238	-1.0523
2.78_432.127				432.127		2.78	30	15	15	0	-0.399086	0.410724	1.51054	1.61764	0.688316	-0.854712	-0.399688	-0.537664	-0.863738	-1.17233
2.78_386.121				386.121		2.78	30	15	15	0	0.56213	-0.239289	0.676771	0.75201	-1.79518	-0.769818	0.285416	1.66697	-0.196012	-0.942998
2.78_347.122				347.122		2.78	30	15	15	0	-1.21244	0.57586	1.23608	1.33944	0.986212	-1.50214	-0.545958	-0.0594964	-0.484749	-0.3328
2.78_340.101				340.101		2.78	29	15	14	0	-0.481489	0.241512	1.02972	1.8723	1.03965	-0.844308	-0.329533	-0.795726	-0.633252	-1.09887
2.78_301.116				301.116		2.78	30	15	15	0	-1.1791	0.564863	1.20853	1.38176	1.00098	-1.49972	-0.503298	-0.0756602	-0.508864	-0.389495
2.77_588.113				588.113		2.77	30	15	15	0	0.450556	1.66687	0.962637	0.910227	-0.78998	-0.0937588	-0.200008	-0.284126	-1.12244	-1.49997
2.77_430.073				430.073		2.77	30	15	15	0	-0.364999	0.74317	1.36031	1.41382	0.923929	-0.691702	-0.48128	-0.736481	-1.00725	-1.15952
2.77_380.089		C21H16O7	380.09	380.089	0.6	2.77	30	15	15	0	-0.386739	0.85254	1.10205	1.48505	1.03262	-0.601922	-0.492802	-0.823477	-1.03116	-1.13616
2.77_352.094		C20H16O6	352.095	352.094	0.69	2.77	27	15	12	0	-0.460802	0.780702	1.14613	1.4653	0.620464	-0.743109	-0.679012	-0.904514	-1.22517	<LOD
2.77_310.127		C12H22O9	310.126	310.127	-0.62	2.77	30	15	15	0	-0.281677	0.679119	1.49373	1.53513	0.638969	-0.684659	-0.573124	-0.77921	-0.982783	-1.04549
2.77_294.131				294.131		2.77	30	15	15	0	-0.232562	0.520402	1.84701	0.942357	0.630077	-0.886499	-0.709812	0.19143	-1.12199	-1.18041
2.76_614.183				614.183		2.76	29	15	14	0	-0.152117	-0.390491	1.22941	-0.466885	1.07073	-1.16399	-0.336365	-0.177629	-1.28517	1.6725
2.76_448.157				448.157		2.76	30	15	15	0	-0.704369	0.12081	1.37967	1.95968	0.479455	-0.822904	-0.294293	-0.313806	-0.78888	-1.01536
2.76_428.189				428.189		2.76	34	15	15	4	-0.700654	-0.0120125	1.11191	1.9647	0.763182	-1.27839	-0.893455	-0.136276	-0.261859	-0.557143
2.76_409.043				409.043		2.76	30	15	15	0	-0.304018	0.902534	1.19777	1.38224	0.976312	-0.606036	-0.470204	-0.855873	-1.07005	-1.15268
2.76_408.099				408.099		2.76	30	15	15	0	-0.435123	1.38738	0.931952	1.48855	0.288068	-1.07921	0.108625	-0.798719	-0.705809	-1.18572
2.76_394.104				394.104		2.76	30	15	15	0	-0.296326	1.01104	1.44571	1.482	0.0314623	-1.17355	-0.478781	-0.0450655	-0.845375	-1.13112
2.76_392.127				392.127		2.76	29	15	14	0	-0.123634	0.889094	0.916176	1.91586	0.172976	-0.59267	-0.0823416	-0.896904	-0.905474	-1.29308
2.76_386.085				386.085		2.76	30	15	15	0	-0.512763	-0.381781	-0.339579	-0.282826	2.81392	-0.380883	-0.503095	-0.108289	-0.256136	-0.0485676
2.76_324.142		C13H24O9	324.142	324.142	0.03	2.76	30	15	15	0	-0.299598	0.85983	1.50757	1.52981	0.326721	-0.921572	-0.313162	-0.6496	-0.998481	-1.04152
2.76_302.095				302.095		2.76	28	15	13	0	0.157411	0.601568	1.88019	1.27308	0.209794	-0.793402	-0.7689	-0.815872	-0.929391	-0.814478
2.76_300.098				300.098		2.76	30	15	15	0	-0.119469	0.613469	1.72574	1.43893	0.389235	-0.718998	-0.602322	-0.730827	-0.954366	-1.04139
2.76_208.057				208.057		2.76	29	15	14	0	-0.235979	0.6987	1.57844	1.26109	0.857075	-0.768285	-0.547546	-0.768136	-0.982503	-1.09285
2.76_102.068		C5H10O2	102.068	102.068	0.08	2.76	30	15	15	0	-0.253206	0.778674	1.29273	1.54602	0.833617	-0.7903	-0.752809	-0.74693	-0.907905	-0.999898
2.75_470.008				470.008		2.75	27	12	15	0	-1.40666	-0.585148	-0.298053	0.445206	0.965355	-1.14227	-0.45972	-0.137629	0.811716	1.80721
2.75_464.149				464.149		2.75	30	15	15	0	0.0994295	-0.0151238	1.07127	0.237367	0.736134	-0.779549	-0.650276	1.75367	-1.4811	-0.971821
2.75_444.125				444.125		2.75	30	15	15	0	-0.388209	-0.190125	1.56924	2.02023	-0.19283	-1.06528	-0.812302	-0.0416802	-0.323839	-0.575206
2.75_418.147				418.147		2.75	30	15	15	0	0.146043	-0.0840182	0.865342	-0.143042	3.69481e-05	-0.407264	-0.670689	2.33692	-0.884072	-1.15926
2.75_216.147				216.147		2.75	40	15	15	10	-0.260874	-0.0464426	-0.317185	-0.60735	-0.812913	-0.276863	1.36913	2.14751	-0.0863903	-1.10862
2.74_314.1		C14H18O8	314.1	314.1	0.2	2.74	30	15	15	0	-0.196963	1.22176	1.61003	0.884662	-0.196737	-0.177205	0.184023	-0.691806	-1.19201	-1.44576
2.74_196.073				196.073		2.74	30	15	15	0	0.840289	0.470671	1.29767	0.880928	0.99112	-0.980511	-0.350324	-0.77368	-1.43737	-0.938798
2.74_131.095				131.095		2.74	39	15	15	9	-0.608506	0.021552	1.534	1.15049	1.3046	-1.27055	-0.508012	-0.293294	-1.11642	-0.213862
2.73_640.16				640.16		2.73	30	15	15	0	1.57828	0.710462	0.847596	0.187323	-0.58567	0.00385211	0.450227	-0.130238	-1.54883	-1.513
2.73_589.162				589.162		2.73	30	15	15	0	2.15491	0.299994	1.0994	-0.0120878	-0.759728	-0.0888931	-0.21777	-0.340096	-0.948126	-1.18761
2.73_562.144				562.144		2.73	30	15	15	0	1.20556	0.326675	1.57958	1.06624	-0.198315	-0.378028	-0.481974	-0.725815	-1.22157	-1.17235
2.73_536.152				536.152		2.73	30	15	15	0	-0.0150167	0.581509	2.31943	0.415049	0.0497719	-0.979686	-0.347549	-0.0262046	-1.12361	-0.873698
2.73_526.168				526.168		2.73	30	15	15	0	1.40263	0.860841	1.25132	0.465692	-0.454443	-0.133462	-0.0270347	-0.539792	-1.41394	-1.41182
2.73_446.177				446.177		2.73	38	15	15	8	-0.572282	0.836193	1.01626	1.74084	-0.244619	-0.817838	0.722063	-0.771662	-0.606355	-1.3026
2.73_418.147				418.147		2.73	30	15	15	0	0.560879	0.903955	0.857784	-0.261403	-0.200155	-1.4334	-0.615978	1.80946	-0.840942	-0.780198
2.73_364.116				364.116		2.73	30	15	15	0	1.33963	0.705589	1.20139	0.440562	-0.45423	-0.0209078	0.283756	-0.507181	-1.32158	-1.66704
2.73_358.126				358.126		2.73	30	15	15	0	1.27827	0.246951	0.998244	-0.119702	1.57054	-0.976695	-0.854685	-1.34674	-0.477393	-0.318786
2.73_288.132				288.132		2.73	20	0	10	10	<LOD	<LOD	<LOD	<LOD	<LOD	<LOD	0.490401	0.773329	-1.45738	0.193653
2.72_590.256				590.256		2.72	30	15	15	0	-0.949102	0.169811	1.74776	1.02424	1.26154	-0.981563	-0.712102	-0.375318	-0.767707	-0.417559
2.72_472.179				472.179		2.72	30	15	15	0	-1.22382	0.071924	0.547395	2.20656	0.538842	-1.26998	-0.44386	-0.463889	-0.0604575	0.097284
2.72_444.073				444.073		2.72	30	15	15	0	0.218533	-0.0291496	1.7748	0.432904	1.46986	-0.97034	-0.314968	-0.508491	-0.985174	-1.08798
2.72_390.199				390.199		2.72	30	15	15	0	-0.415204	0.536785	1.68009	1.37275	0.602007	-1.16243	-0.609936	-0.163566	-1.03466	-0.805836
2.71_308.147				308.147		2.71	30	15	15	0	-0.818465	0.41305	0.884598	1.95637	0.727713	-0.236029	-0.482916	-1.10171	-1.22631	-0.116308
2.7_358.125				358.125		2.7	30	15	15	0	-0.350092	1.91044	0.591568	-0.0198289	0.531771	-1.52428	-0.821642	-1.12221	0.320951	0.483326
2.69_640.161				640.161		2.69	30	15	15	0	1.05174	0.677397	1.69751	0.295706	-0.389402	-0.448362	-0.049666	0.0314479	-1.40305	-1.46333
2.69_526.168				526.168		2.69	30	15	15	0	0.309833	0.690717	1.9685	0.673847	-0.229317	-0.354132	-0.0273414	-0.256022	-1.39932	-1.37677
2.69_414.173				414.173		2.69	30	15	15	0	-0.642926	0.324284	0.657901	1.91285	1.25766	-0.63882	-0.287061	-0.646669	-0.861701	-1.07552
2.69_316.094				316.094		2.69	30	15	15	0	1.13738	0.731446	1.6491	0.209918	-0.215005	-0.22088	0.00990938	-0.433415	-1.36086	-1.5076
2.68_527.171				527.171		2.68	30	15	15	0	0.483361	-0.110178	1.06667	-0.0194313	-0.812814	-1.02999	-1.26562	2.04708	-0.31685	-0.0422327
2.68_294.131				294.131		2.68	33	15	15	3	-0.505372	0.206154	1.75361	1.52253	0.144318	-1.23463	-0.5655	0.0188545	-1.19239	-0.147582
2.68_166.027				166.027		2.68	30	15	15	0	0.539976	-0.179458	2.37775	0.822927	-0.291379	-0.779226	-0.383024	-0.687336	-0.823222	-0.597005
2.67_496.177				496.177		2.67	39	15	15	9	-0.498485	0.82258	0.896787	1.97847	-0.386225	-1.00024	0.0624766	0.0523029	-0.550277	-1.37739
2.67_149.084				149.084		2.67	30	15	15	0	-1.26169	0.384538	1.21194	1.22859	0.962089	-1.42883	-0.224776	-0.690552	-0.711568	0.530248
2.66_409.043				409.043		2.66	30	15	15	0	0.754124	0.226778	0.260276	1.83609	0.786475	-0.498521	-0.108914	-0.538958	-1.15932	-1.55803
2.66_380.09		C21H16O7	380.09	380.09	-0.4	2.66	30	15	15	0	0.341508	0.0569572	0.198342	2.12937	0.846669	-0.672072	-0.0237828	-0.503444	-1.00352	-1.37003
2.66_378.113				378.113		2.66	35	15	15	5	-0.723347	0.402523	1.08624	2.00687	0.140678	-0.969033	-0.268549	0.307385	-1.08144	-0.901329
2.66_310.126				310.126		2.66	40	15	15	10	-0.693394	0.339077	0.788265	2.08842	0.684039	-0.633775	-0.141797	-0.204956	-1.03421	-1.19167
2.66_300.098				300.098		2.66	30	15	15	0	-0.68427	-0.0897715	1.08846	2.03438	-0.353778	-0.873084	-0.017635	0.754559	-0.841448	-1.01741
2.65_470.196				470.196		2.65	22	15	7	0	-1.02337	-0.0382676	1.5401	1.48148	-0.576599	-0.926808	-0.349513	<LOD	0.676297	-0.783315
2.65_458.198				458.198		2.65	29	15	14	0	-1.1457	-0.762312	-0.419133	-0.0915278	-0.302678	-1.28635	0.200984	1.67677	1.23169	0.898262
2.63_216.148				216.148		2.63	40	15	15	10	-1.04249	-0.595887	-0.536011	-0.678114	-0.65758	-0.719297	0.131693	1.75588	1.26763	1.07417
2.62_472.214				472.214		2.62	24	15	9	0	-0.984063	0.261097	1.15477	1.88561	0.217626	-0.735688	-0.211929	<LOD	-0.492907	-1.09451
2.62_322.048				322.048		2.62	24	0	15	9	<LOD	<LOD	<LOD	<LOD	<LOD	-1.49736	-0.0209444	1.25939	0.392038	-0.133121
2.62_276.055				276.055		2.62	23	0	14	9	<LOD	<LOD	<LOD	<LOD	<LOD	-1.419	-0.235485	1.34962	0.329974	-0.0251066
2.62_238.096				238.096		2.62	25	0	15	10	<LOD	<LOD	<LOD	<LOD	<LOD	-1.28869	-0.284257	1.4704	0.264729	-0.162186
2.62_194.105				194.105		2.62	24	0	15	9	<LOD	<LOD	<LOD	<LOD	<LOD	-1.30838	-0.30598	1.44374	0.303899	-0.133277
2.61_785.155				785.155		2.61	40	15	15	10	-0.692504	-0.113575	-0.905352	-1.37456	-0.692109	1.22503	1.78475	0.795334	0.00225853	-0.0292697
2.61_604.113				604.113		2.61	29	15	14	0	0.861699	0.211984	2.01248	0.449908	0.338344	-1.34137	-0.818642	-0.528606	-1.03656	-0.149241
2.61_456.03				456.03		2.61	30	15	15	0	0.555035	1.17283	0.633469	-0.0819513	1.80879	-0.555936	-0.572776	-1.21754	-0.869179	-0.872742
2.61_404.072				404.072		2.61	34	15	15	4	0.814708	0.788975	1.33138	0.46159	1.21115	-0.943083	-0.970491	-0.928312	-0.95014	-0.815769
2.61_353.075				353.075		2.61	30	15	15	0	1.89687	0.206739	1.54983	0.147997	-0.17291	-0.8519	-0.931392	-0.271407	-0.791493	-0.782328
2.61_328.047				328.047		2.61	30	15	15	0	1.14242	0.169044	1.97749	0.278259	0.35628	-1.10081	-1.06523	-0.271448	-0.859615	-0.626383
2.61_326.056				326.056		2.61	30	15	15	0	1.01977	0.109684	2.06864	0.253152	-0.0598327	-1.36736	-1.1147	-0.00123672	-0.649696	-0.258416
2.61_312.061				312.061		2.61	25	14	11	0	1.047	0.0888164	1.20098	0.0210851	1.56714	-0.915705	-0.309643	-1.30217	-1.14071	-0.25678
2.61_308.089				308.089		2.61	30	15	15	0	0.725724	0.532538	2.02633	0.620731	0.149505	-1.12503	-1.11053	-0.509843	-0.827673	-0.481753
2.61_288.064				288.064		2.61	30	15	15	0	1.00111	0.723355	1.53042	0.370259	0.908961	-0.997287	-1.00665	-0.893773	-0.926373	-0.710017
2.6_633.068				633.068		2.6	30	15	15	0	0.986391	0.655846	1.78465	0.444876	0.494559	-0.823483	-1.05679	-1.00061	-0.929795	-0.555648
2.6_618.112				618.112		2.6	29	15	14	0	1.00599	0.492559	1.87912	0.589616	0.297724	-0.868955	-0.66776	-1.02138	-1.04966	-0.657262
2.6_577.635				577.635		2.6	29	15	14	0	1.80832	0.0601319	1.64756	0.0940738	-0.0649203	-0.858344	-0.198861	-1.00582	-0.978205	-0.503943
2.6_577.133				577.133		2.6	30	15	15	0	1.57519	0.0645411	1.78933	0.498836	-0.196038	-0.870375	-0.652684	-0.919023	-0.932734	-0.357048
2.6_502.036				502.036		2.6	30	15	15	0	0.942252	0.830035	1.12238	0.586932	1.16011	-0.88859	-0.845511	-1.27273	-0.896132	-0.73875
2.6_481.007				481.007		2.6	30	15	15	0	0.925727	0.864459	0.928054	0.378244	1.44192	-0.608826	-0.88474	-1.21688	-0.974512	-0.853442
2.6_452.053		C26H12O8	452.053	452.053	0.22	2.6	30	15	15	0	0.977145	0.825735	0.858598	0.302533	1.50125	-0.555789	-0.740164	-1.27957	-0.97009	-0.919649
2.6_435.001				435.001		2.6	30	15	15	0	0.72468	0.794781	0.909446	0.318682	1.66061	-0.591706	-0.665007	-1.24004	-0.958611	-0.952833
2.6_424.058				424.058		2.6	30	15	15	0	0.342947	1.03438	0.658028	0.071304	1.84972	-0.995771	-0.48718	-1.4844	-0.619878	-0.369156
2.6_420.037				420.037		2.6	30	15	15	0	1.08589	0.729201	1.3436	0.494908	0.960488	-0.871278	-0.882302	-1.11397	-0.952852	-0.793687
2.6_406.048		C25H10O6	406.048	406.048	-0.26	2.6	30	15	15	0	0.780767	0.818039	0.768147	0.355041	1.65785	-0.505216	-0.631828	-1.32614	-0.900292	-1.01637
2.6_390.002				390.002		2.6	30	15	15	0	0.83254	0.767006	1.25901	0.500298	1.22509	-0.639635	-0.782982	-1.19089	-0.967725	-1.00272
2.6_389.976				389.976		2.6	29	14	15	0	1.07351	1.05472	-0.0715805	0.56428	1.43943	-0.10641	-0.430781	-1.23339	-1.14474	-1.14503
2.6_388.055				388.055		2.6	30	15	15	0	0.787085	0.460091	2.11273	0.548035	-0.0672591	-1.07629	-0.956597	-0.208455	-0.752615	-0.846732
2.6_387.977				387.977		2.6	30	15	15	0	1.01752	0.980996	0.772473	0.462359	1.2894	-0.450614	-0.755517	-1.34874	-0.986745	-0.981135
2.6_378.053				378.053		2.6	30	15	15	0	0.809781	1.08834	0.633294	0.310804	1.54062	-0.486777	-0.64829	-1.31962	-0.839362	-1.08879
2.6_374.037		C28H6O2	374.037	374.037	-0.22	2.6	30	15	15	0	1.07357	0.779598	1.1771	0.422765	1.1522	-0.737615	-0.815872	-1.16526	-0.922744	-0.963743
2.6_358.065				358.065		2.6	30	15	15	0	1.03656	0.736102	1.26245	0.317929	1.20744	-0.802717	-0.88124	-1.13157	-0.93205	-0.812903
2.6_312.082				312.082		2.6	30	15	15	0	0.825498	1.17141	1.44798	0.67494	-0.109017	-0.157307	-0.363676	-0.930673	-1.07404	-1.48511
2.6_222.089		C12H14O4	222.089	222.089	0.21	2.6	30	15	15	0	0.931454	0.515413	1.7789	0.565558	0.635473	-0.957905	-0.939155	-0.981277	-0.867003	-0.681456
2.6_204.079		C12H12O3	204.079	204.079	-0.36	2.6	30	15	15	0	0.893754	0.566513	1.73481	0.41628	0.824402	-1.02338	-0.98854	-0.928799	-0.828221	-0.666817
2.59_412.133				412.133		2.59	39	15	15	9	-0.476159	-0.467022	0.904629	0.804765	-0.274118	-1.4351	1.06889	1.37001	-0.109113	-1.38678
2.58_616.109				616.109		2.58	30	15	15	0	-0.416778	-0.0340161	1.80915	1.56627	0.645587	-0.943636	-0.475903	-0.597486	-0.74503	-0.808161
2.58_414.173				414.173		2.58	30	15	15	0	-0.514428	0.483835	0.600291	1.89131	1.14699	-0.615568	-0.209942	-0.648385	-0.814396	-1.31971
2.58_402.115				402.115		2.58	30	15	15	0	1.22927	0.882321	1.26246	0.788349	7.26754e-05	-0.47566	-0.252183	-0.719188	-1.33298	-1.38246
2.58_368.168				368.168		2.58	30	15	15	0	-0.445641	0.367558	0.544915	2.13052	0.882376	-0.669518	-0.179074	-0.634102	-0.702562	-1.29447
2.58_356.111				356.111		2.58	30	15	15	0	1.52692	0.653701	1.4527	0.413507	-0.356629	-0.397903	-0.234828	-0.449332	-1.21435	-1.39379
2.58_326.158				326.158		2.58	15	0	15	0	<LOD	<LOD	<LOD	<LOD	<LOD	-1.56022	-0.382302	0.614431	0.381118	0.946978
2.57_444.199				444.199		2.57	30	15	15	0	-0.308122	0.326571	1.9873	0.707493	0.886061	-0.949843	-0.719996	0.0644775	-1.27152	-0.722425
2.57_296.053				296.053		2.57	30	15	15	0	-0.969551	-0.81454	0.378429	0.751256	1.69789	-1.12695	-1.07439	0.357329	-0.282987	1.08351
2.55_434.142				434.142		2.55	30	15	15	0	-0.137443	0.332424	1.23865	2.0485	-0.193581	-0.62035	-0.257267	-0.129371	-1.01428	-1.26728
2.54_426.173				426.173		2.54	30	15	15	0	-0.621804	0.162895	1.25077	1.94037	0.779173	-0.790842	-0.325634	-0.746043	-0.787178	-0.861711
2.53_356.167				356.167		2.53	30	15	15	0	-0.694445	0.157763	0.85873	2.06639	0.991029	-0.975765	-0.384453	-0.502203	-0.743038	-0.77401
2.52_466.111				466.111		2.52	30	15	15	0	0.544018	0.978188	1.99911	0.461039	-0.39596	-0.77717	-0.0226069	-0.76212	-1.28314	-0.741362
2.52_404.132				404.132		2.52	31	15	13	3	1.38459	0.291048	1.73126	-0.289456	-0.551558	-0.291923	-0.835339	0.658486	-0.734385	-1.36272
2.52_312.085				312.085		2.52	30	15	15	0	0.606206	1.17481	1.45518	0.373478	0.0121265	0.336942	-0.515326	-0.493669	-1.37027	-1.57947
2.52_130.063		C6H10O3	130.063	130.063	-0.01	2.52	38	13	15	10	-0.680317	-0.68537	-0.683596	-0.715241	-0.699215	-0.409252	1.87239	1.62539	0.51475	-0.139538
2.51_388.136				388.136		2.51	30	15	15	0	0.569253	0.634368	1.63274	0.948347	0.399974	-0.701499	-0.305754	-0.448671	-1.50294	-1.22582
2.5_490.168				490.168		2.5	30	15	15	0	-0.796723	0.6816	0.615097	1.93767	0.484372	-0.366614	-0.092823	-0.062311	-0.697355	-1.70291
2.49_318.144				318.144		2.49	30	15	15	0	-0.0354903	0.779178	1.59901	1.519	0.16408	-1.0885	-0.666477	-0.490489	-1.04203	-0.738292
2.48_349.137				349.137		2.48	30	15	15	0	-0.966193	0.0505813	1.07735	1.85189	0.974719	-1.29152	-0.687011	-0.225308	-0.504373	-0.280135
2.47_606.124				606.124		2.47	30	15	15	0	0.098984	0.5281	1.94261	1.06447	0.195726	-0.493749	-0.225329	-0.632063	-1.2405	-1.23825
2.47_432.162				432.162		2.47	29	15	14	0	-0.820706	0.230291	0.896606	1.62172	1.50684	-0.835953	-0.313318	-0.747219	-0.645648	-0.892617
2.47_398.079		C24H14O6	398.079	398.079	0.04	2.47	30	15	15	0	0.862878	0.370803	1.47368	0.627394	1.08385	-0.618092	-0.697666	-0.601237	-1.34718	-1.15443
2.46_470.199				470.199		2.46	26	15	11	0	-0.454802	0.426125	1.22002	1.83293	0.489428	-0.253018	-0.245021	-0.602196	-0.956922	-1.45655
2.46_442.109				442.109		2.46	29	15	14	0	0.157307	0.0662417	2.51507	-0.0112434	0.404682	-0.562595	-0.143843	-0.521493	-0.779794	-1.12434
2.46_166.062				166.062		2.46	30	15	15	0	1.24894	0.286745	1.93123	0.0643522	0.103835	-0.105019	-0.430515	-0.671263	-1.30921	-1.11909
2.45_349.988				349.988		2.45	30	15	15	0	-0.255715	1.22706	0.512763	0.137113	1.19845	-0.815193	0.8063	-0.738082	-0.113459	-1.95924
2.45_328.959				328.959		2.45	30	15	15	0	-0.408406	0.90336	-0.802679	-0.344048	1.48798	0.549083	1.18111	-0.906166	-0.0736236	-1.58661
2.45_300.007				300.007		2.45	33	15	15	3	-0.290635	0.895486	-0.602875	0.24391	1.49963	-0.222127	1.06546	-0.938242	0.178364	-1.82897
2.45_251.928				251.928		2.45	19	10	9	0	-0.650773	0.351998	-0.208968	1.65971	-0.379679	-0.398867	1.90328	-0.75523	-0.780533	-0.740932
2.45_190.084				190.084		2.45	33	15	15	3	-0.0846236	0.39631	2.17173	0.902522	0.18262	-0.770423	0.00115017	-0.72463	-1.0179	-1.05675
2.44_414.173				414.173		2.44	30	15	15	0	-0.525975	0.440609	0.943211	1.91049	0.929962	-0.709678	-0.470204	-0.417894	-0.951981	-1.14854
2.44_338.157				338.157		2.44	30	15	15	0	-0.835091	0.129015	1.14563	1.66139	1.23307	-1.06589	-0.732023	-0.405779	-0.894835	-0.23549
2.44_139.063		C7H9NO2	139.063	139.063	0.33	2.44	39	14	15	10	1.33544	0.976758	0.836182	-0.0584904	-0.368754	0.115386	0.734752	-0.553365	-1.43598	-1.58193
2.43_546.215				546.215		2.43	30	15	15	0	-0.703785	-0.0353423	1.05744	2.16722	-0.0616749	-1.21849	0.156211	-0.359434	0.0205279	-1.02268
2.41_402.075				402.075		2.41	30	15	15	0	-0.739846	-0.419445	0.28577	1.34703	2.04394	-0.85074	-0.969384	-0.0445058	0.0762673	-0.729091
2.41_400.098				400.098		2.41	28	14	14	0	-0.623531	-0.370897	0.455186	1.03812	0.974886	-1.47346	-1.46522	0.728249	1.11624	-0.379569
2.41_180.062				180.062		2.41	28	14	14	0	-0.610571	-0.13201	-0.0444667	0.87482	1.70456	-1.45778	-1.26497	0.695512	0.709218	-0.474316
2.4_606.124				606.124		2.4	30	15	15	0	0.135038	0.603911	1.82129	1.16597	0.0847647	-0.539634	-0.120144	-0.590977	-1.30326	-1.25696
2.4_412.996				412.996		2.4	29	15	14	0	-0.631378	0.0582756	0.738777	1.84751	1.45362	-0.97602	-0.691977	-0.640014	-0.497459	-0.661329
2.39_551.068				551.068		2.39	30	15	15	0	-0.989261	0.14907	0.732192	1.44391	1.75089	-1.01362	-0.291578	-0.499546	-0.387348	-0.894716
2.39_522.116				522.116		2.39	30	15	15	0	-0.90776	0.0840458	0.989724	1.68993	1.36751	-1.07283	-0.391189	-0.540308	-0.360215	-0.85891
2.39_520.139				520.139		2.39	30	15	15	0	-0.965267	-0.0587214	1.3566	1.65182	0.996682	-1.24284	-0.585145	-0.189784	-0.241358	-0.721983
2.39_494.121				494.121		2.39	30	15	15	0	-0.952975	0.11056	0.998005	1.63792	1.37028	-1.11968	-0.376476	-0.552974	-0.240529	-0.874127
2.39_469.142				469.142		2.39	30	15	15	0	-0.356655	-0.0638917	1.99039	1.41898	0.447771	-0.944059	-0.695837	-0.250858	-0.599832	-0.946002
2.39_452.153				452.153		2.39	30	15	15	0	-0.839322	0.0926283	1.28198	1.73073	1.07042	-1.03343	-0.463956	-0.52415	-0.457697	-0.857199
2.39_444.121				444.121		2.39	29	15	14	0	-0.663452	0.0488259	1.7389	1.72346	0.400758	-0.969238	-0.605536	-0.322312	-0.476139	-0.875262
2.39_442.123				442.123		2.39	30	15	15	0	-0.66842	-0.0415666	1.72231	1.65517	0.631377	-1.03264	-0.593067	-0.399147	-0.466768	-0.80725
2.39_406.147				406.147		2.39	30	15	15	0	-0.841661	0.0599577	1.16764	1.76819	1.16044	-1.02526	-0.458984	-0.571251	-0.441488	-0.817584
2.38_475.15				475.15		2.38	30	15	15	0	-0.542337	0.0599409	0.294975	2.39586	0.0984268	-0.804202	0.101971	-0.409653	0.216915	-1.41189
2.38_426.094				426.094		2.38	30	15	15	0	1.61529	0.0571785	1.6325	0.434571	0.0800073	-0.7081	-0.897324	-0.558495	-1.34656	-0.309068
2.37_381.048				381.048		2.37	27	15	12	0	-0.274111	0.63394	0.894588	1.70099	1.15028	-0.626509	-0.622269	-0.889992	-0.982408	-0.984506
2.37_352.095		C20H16O6	352.095	352.095	-0.31	2.37	26	15	11	0	-0.375913	0.484794	0.968172	1.89263	0.970038	-0.633251	-0.693508	-0.820432	-0.924717	-0.867815
2.37_350.121				350.121		2.37	29	15	14	0	-0.27706	0.872088	1.34996	1.686	0.1926	-0.714415	-0.254582	-0.625023	-1.04668	-1.18289
2.37_282.131		C11H22O8	282.131	282.131	0.47	2.37	30	15	15	0	-0.234109	0.462329	1.13878	1.83736	0.84225	-0.660775	-0.662668	-0.876684	-0.934791	-0.911692
2.36_677.058				677.058		2.36	30	15	15	0	1.69808	0.497945	1.5783	0.00185695	0.13397	-0.452662	-0.582547	-0.827227	-1.15513	-0.89258
2.36_662.096				662.096		2.36	30	15	15	0	1.57546	0.163621	1.70937	0.317896	0.255256	-0.506372	-0.681146	-1.0032	-0.90628	-0.924599
2.36_408.084				408.084		2.36	30	15	15	0	1.16519	0.464526	2.07462	-0.154477	-0.000582147	-0.534576	-1.09074	-0.507229	-1.13399	-0.282744
2.35_332.111				332.111		2.35	29	15	14	0	-0.640495	0.277191	1.41563	1.70754	0.857059	-0.749854	-0.32612	-0.693639	-0.887369	-0.959942
2.34_456.183				456.183		2.34	21	15	6	0	-0.931009	-0.0975001	0.664962	1.71019	0.476464	-1.27994	-0.881506	0.338339	<LOD	<LOD
2.34_322.126				322.126		2.34	30	15	15	0	-0.241985	0.823189	1.44753	1.49838	0.394161	-0.491156	-0.238632	-0.98777	-1.28334	-0.920387
2.34_314.064				314.064		2.34	28	15	13	0	-0.185134	-0.0881615	1.4566	0.356342	0.0630618	-0.925934	-0.815062	1.88676	-1.09242	-0.656046
2.33_418.11				418.11		2.33	30	15	15	0	-0.30067	0.594315	1.5826	1.60684	-0.0415043	-0.939995	-0.252731	-0.0456358	-0.887705	-1.31551
2.31_404.131				404.131		2.31	30	15	15	0	0.917084	0.655109	1.61765	1.09754	-0.383483	-1.036	-0.53033	-0.220136	-0.817287	-1.30015
2.31_386.085				386.085		2.31	30	15	15	0	-0.215094	-0.353388	0.123621	-0.458782	2.56448	-0.742336	-0.72235	0.506556	-0.825801	0.123097
2.31_328.08				328.08		2.31	26	12	14	0	-0.660754	-0.288831	0.430224	1.10071	2.27361	-0.903093	-0.773608	-0.336448	-0.293485	-0.548325
2.3_452.133				452.133		2.3	30	15	15	0	-0.213468	0.571962	1.75842	1.46619	0.356577	-1.05524	-0.601655	-0.932061	-0.706125	-0.644601
2.3_181.038				181.038		2.3	20	0	10	10	<LOD	<LOD	<LOD	<LOD	<LOD	<LOD	-1.10369	-0.574122	0.689342	0.988467
2.29_346.125				346.125		2.29	30	15	15	0	-0.021669	1.10441	1.45641	1.30911	-0.208264	-0.436606	0.0873593	-0.920567	-1.03187	-1.33831
2.28_606.124				606.124		2.28	30	15	15	0	0.0271774	0.294333	1.86216	1.45445	0.134301	-0.72523	-0.305636	-0.560977	-1.08891	-1.09167
2.28_372.105				372.105		2.28	28	14	14	0	0.73631	1.22939	1.61611	0.515773	0.0798673	-0.780029	-0.402914	-0.608496	-1.3862	-0.999815
2.26_271.052				271.052		2.26	30	15	15	0	-0.343369	0.0279652	1.1593	1.61405	1.27768	-0.928079	-0.187528	-0.739714	-0.730041	-1.15026
2.25_386.084				386.084		2.25	30	15	15	0	-0.306602	-0.526392	-0.309355	-0.341991	2.7606	-0.538622	-0.565905	-0.203854	-0.251263	0.283389
2.25_352.136				352.136		2.25	30	15	15	0	-0.959913	0.00340942	1.51184	2.03034	-0.354534	-1.0631	-0.160171	-0.235626	-0.253092	-0.51915
2.25_276.121				276.121		2.25	14	0	14	0	<LOD	<LOD	<LOD	<LOD	<LOD	-1.55037	-0.269435	0.857484	0.884542	0.0777842
2.24_311.1				311.1		2.24	30	15	15	0	-1.52595	0.0388052	0.905679	1.51593	0.498942	-1.44708	-0.609183	-0.260824	0.00647693	0.877207
2.24_234.11				234.11		2.24	40	15	15	10	-0.559405	0.369889	0.832378	1.78535	1.32901	-0.877699	-0.564418	-0.673769	-0.737655	-0.90368
2.23_550.149				550.149		2.23	30	15	15	0	-0.598736	0.150866	1.32377	2.07009	0.374684	-0.873006	-0.536471	-0.360958	-0.603558	-0.946682
2.23_482.163				482.163		2.23	30	15	15	0	-0.558607	0.318592	1.21435	1.92704	0.734143	-0.837476	-0.45	-0.622878	-0.663278	-1.06188
2.23_436.158				436.158		2.23	30	15	15	0	-0.578188	0.429073	1.11572	1.9866	0.676112	-0.818129	-0.474902	-0.671778	-0.606846	-1.05766
2.22_412.096				412.096		2.22	28	14	14	0	0.0155254	0.530687	1.10129	1.91212	0.315547	-0.598984	-0.509209	-0.314883	-1.11229	-1.33981
2.22_358.126				358.126		2.22	29	15	14	0	0.765427	0.736324	1.91078	-0.0229063	0.401323	-0.867923	0.00679693	-0.503891	-1.44692	-0.979008
2.22_344.111				344.111		2.22	30	15	15	0	-0.0136931	0.804057	1.06361	1.23165	0.466484	0.258267	-0.0775442	-0.550933	-1.43446	-1.74744
2.22_328.114				328.114		2.22	30	15	15	0	0.440368	-0.41909	1.93947	-0.538585	0.915885	0.560911	0.135652	-0.567182	-1.09025	-1.37718
2.2_155.022				155.022		2.2	39	15	15	9	-0.0529775	0.428505	1.54002	1.55127	-1.11846	-0.610951	0.285628	0.12621	-1.12	-1.02924
2.2_111.032				111.032		2.2	35	14	15	6	0.32807	0.561903	1.78461	1.28887	-0.978919	-0.921785	-0.0632767	-0.0416444	-0.965298	-0.992529
2.19_414.173				414.173		2.19	30	15	15	0	-0.707121	0.0276529	1.2449	2.16035	0.324934	-0.901473	-0.469481	-0.244157	-0.554118	-0.881488
2.18_438.136				438.136		2.18	30	15	15	0	-0.513201	0.417538	1.17461	1.72249	0.911663	-0.816565	-0.309306	-0.46769	-0.779555	-1.33999
2.18_413.058				413.058		2.18	27	3	15	9	<LOD	<LOD	-0.0795092	-1.18404	<LOD	-0.00153321	1.87514	0.388655	-0.0379465	-0.960763
2.18_376.184				376.184		2.18	30	15	15	0	-0.515785	-0.00401483	1.29249	1.09695	1.64647	-1.25859	-0.714123	-0.500514	-0.88264	-0.160242
2.18_343.095				343.095		2.18	40	15	15	10	-0.881707	-0.85399	-0.964725	-0.411984	-0.790438	0.726975	2.01833	0.968999	0.41767	-0.229135
2.18_297.089				297.089		2.18	39	14	15	10	-1.17179	-0.935384	-0.891772	-0.524409	-0.243035	0.684988	2.01305	0.991872	0.27731	-0.200836
2.18_135.054				135.054		2.18	40	15	15	10	-1.08167	-0.887658	-0.838221	-0.456705	-0.608017	0.54082	2.01879	1.04408	0.499682	-0.231101
2.17_311.1				311.1		2.17	30	15	15	0	-1.47698	0.113962	0.780788	1.53308	0.48618	-1.5977	-0.614888	-0.213445	0.226282	0.762712
2.17_252.12				252.12		2.17	35	15	14	6	-0.440091	0.157808	2.06014	1.26085	0.534838	-0.72665	-0.484129	-0.631158	-0.838839	-0.89277
2.16_294.131				294.131		2.16	30	15	15	0	-0.862931	-0.339825	-0.283434	2.23516	0.904679	-1.30863	-0.699098	0.0813268	0.130416	0.142334
2.15_550.148				550.148		2.15	30	15	15	0	-1.20409	-0.636384	0.729577	2.01643	0.0535237	-1.50657	0.0548756	0.345975	0.338686	-0.192026
2.15_482.163				482.163		2.15	30	15	15	0	-0.72414	0.0434899	1.26657	2.02359	0.579011	-1.00139	-0.495944	-0.376359	-0.353594	-0.961233
2.15_472.131				472.131		2.15	28	14	14	0	-0.38242	-0.721915	1.47454	1.25804	-0.866314	-1.04579	-0.473592	0.466458	1.20551	-0.914516
2.15_436.157				436.157		2.15	30	15	15	0	-0.742078	0.0343505	1.13326	2.02181	0.739225	-1.12671	-0.436123	-0.41227	-0.317432	-0.894034
2.14_394.105				394.105		2.14	30	15	15	0	-0.795472	-0.516351	1.5291	0.0137146	1.58464	-1.24471	-1.08092	0.421895	-0.375235	0.463345
2.14_360.105				360.105		2.14	30	15	15	0	0.00817101	-0.0090324	1.82316	0.983265	0.729213	-1.64584	-0.578987	-0.665742	0.169153	-0.813363
2.14_324.142		C13H24O9	324.142	324.142	0.03	2.14	30	15	15	0	-1.31682	-1.16454	1.51731	0.869443	-0.0784073	-0.703404	-0.285201	1.44119	0.137055	-0.416624
2.14_322.036				322.036		2.14	30	15	15	0	0.150757	-0.138457	2.27142	0.860709	-0.549734	-0.891396	-0.457262	0.474873	-0.709191	-1.01172
2.14_206.079				206.079		2.14	30	8	12	10	0.505845	-0.0848184	0.600536	0.848364	<LOD	1.28315	0.501779	-0.855448	-1.63228	-1.16712
2.13_448.121				448.121		2.13	30	15	15	0	-1.0105	-0.351904	1.37608	0.0566517	0.497425	-1.41867	-1.19421	0.512287	0.120353	1.41249
2.12_524.145				524.145		2.12	34	13	13	8	-0.908571	-0.426284	0.41445	-0.505074	0.383127	-1.12558	-0.879105	1.37538	1.8582	-0.186546
2.12_492.132				492.132		2.12	23	4	12	7	<LOD	<LOD	-0.867205	-0.799643	<LOD	<LOD	-0.689934	1.29384	1.19989	-0.13695
2.12_490.194				490.194		2.12	21	9	12	0	-0.562562	-0.576296	0.320049	-0.263519	-0.749751	-0.786042	-0.23309	2.57642	0.504482	-0.229694
2.12_446.135				446.135		2.12	35	14	14	7	-0.720016	-0.523785	-0.130627	-0.154836	-0.559105	-0.967703	-0.629516	1.89979	1.70441	0.081384
2.12_430.16				430.16		2.12	25	8	10	7	-0.631953	-1.01162	-0.531057	-0.208535	<LOD	<LOD	-0.696657	1.74356	1.31374	0.0225194
2.12_402.073				402.073		2.12	30	15	15	0	0.545505	0.128065	1.91168	-0.425218	0.273098	-1.23234	-0.181113	1.04367	-0.973644	-1.08969
2.12_400.098				400.098		2.12	35	15	15	5	-0.26024	-0.464909	1.6317	-0.364582	-0.644045	-1.34124	-0.143813	1.86606	0.148002	-0.426939
2.12_366.064				366.064		2.12	30	7	14	9	-0.731926	-0.998366	-0.359375	0.238661	-0.649519	-1.14188	-0.286422	1.6931	1.35004	0.885679
2.12_350.02				350.02		2.12	38	14	15	9	-0.876926	-0.938486	-0.46309	-0.378999	-0.87236	-0.792206	0.521179	1.34132	1.73379	0.725776
2.12_349.101				349.101		2.12	24	12	12	0	0.0346436	-0.475393	2.07439	-0.139635	-0.580687	-1.09589	0.0607456	1.39017	-0.341409	-0.926933
2.12_340.027				340.027		2.12	29	15	14	0	-0.689816	0.121348	1.83888	1.07343	1.10851	-1.09986	-0.828914	-0.30434	-0.525317	-0.693921
2.12_334.048				334.048		2.12	40	15	15	10	-0.839583	-1.01327	-0.148913	-0.375057	-0.937351	-0.926268	0.593455	1.41046	1.63126	0.605266
2.12_322.08				322.08		2.12	32	15	14	3	-0.410067	-0.50928	1.82319	-0.34214	-0.712316	-1.11001	-0.065192	1.78119	0.00820466	-0.463577
2.12_320.059				320.059		2.12	25	3	13	9	<LOD	<LOD	-0.478245	-0.712926	<LOD	-1.33655	-0.0801355	0.944329	1.60469	0.0588371
2.12_288.048				288.048		2.12	38	14	15	9	-0.83331	-1.01219	-0.196408	-0.315539	-0.959529	-0.881401	0.482669	1.42074	1.67685	0.618129
2.12_272.077				272.077		2.12	39	15	15	9	-0.874189	-0.905141	-0.307553	-0.359874	-0.913539	-0.86685	0.373263	1.46076	1.68121	0.711915
2.12_236.079				236.079		2.12	30	8	14	8	-0.913257	<LOD	-0.311245	-0.629518	<LOD	-0.84667	-0.3814	1.8214	1.22124	0.0394514
2.12_218.069				218.069		2.12	27	6	12	9	-0.756265	<LOD	-0.691239	-0.641224	<LOD	<LOD	-0.586644	1.77147	1.0213	-0.117394
2.12_159.089				159.089		2.12	37	15	15	7	-1.27281	-0.0863361	0.947638	0.407064	0.622393	-2.05907	-0.507842	0.972395	0.514561	0.461999
2.12_156.069				156.069		2.12	33	13	15	5	-0.27418	-0.74615	0.596861	1.44912	0.0430004	-1.41308	-1.25465	1.0321	1.02952	-0.462543
2.12_143.073				143.073		2.12	32	9	14	9	-0.825273	-0.812886	-0.384785	-0.208043	-0.810195	-0.836208	0.00898751	1.78954	1.65089	0.427971
2.12_117.058		C8H7N	117.058	117.058	-0.15	2.12	40	15	15	10	-0.780703	-0.816288	-0.310547	-0.398157	-0.834108	-0.830407	0.0481159	1.78624	1.62019	0.515664
2.11_508.103				508.103		2.11	34	13	14	7	-0.6405	-0.858902	-0.0384234	0.143196	-0.540413	-1.2577	-0.154779	1.62068	1.81596	-0.0891247
2.11_431.027				431.027		2.11	27	15	12	0	0.465649	0.0462449	1.43121	-0.70525	0.333814	-1.21537	0.159264	1.53892	-0.760184	-1.2943
2.1_506.123				506.123		2.1	30	15	15	0	-0.769719	0.0534074	1.0876	1.76128	-0.829462	-1.438	-0.0843887	0.244397	0.792642	-0.817759
2.1_473.164				473.164		2.1	33	15	15	3	-0.650113	0.299619	1.68934	1.18362	1.04131	-1.26236	-0.817089	-0.363945	-0.812364	-0.308004
2.1_438.137				438.137		2.1	30	15	15	0	-0.459541	0.300847	1.51867	1.8255	0.168922	-0.842763	-0.239919	-0.532515	-0.386309	-1.3529
2.1_428.105				428.105		2.1	30	15	15	0	-0.669049	-0.530039	1.89939	1.37036	-0.599138	-1.16334	-0.462436	0.441732	0.414501	-0.701976
2.1_392.131				392.131		2.1	30	15	15	0	-0.598029	0.145118	1.63725	1.72237	0.208359	-1.10787	-0.347162	-0.239207	-0.202337	-1.21848
2.09_414.173				414.173		2.09	30	15	15	0	-0.425742	0.120565	1.35357	1.7623	0.67938	-1.39834	-0.88886	-0.231802	-0.226542	-0.744528
2.09_306.971				306.971		2.09	25	0	15	10	<LOD	<LOD	<LOD	<LOD	<LOD	-1.38321	-0.335909	1.20704	0.695256	-0.183179
2.06_444.123				444.123		2.06	30	15	15	0	0.230142	0.325067	1.78979	1.48647	-0.446869	-1.13481	-0.717759	0.111738	-0.645377	-0.998388
2.05_458.199				458.199		2.05	30	15	15	0	-0.748957	0.25554	0.636633	2.02762	0.942025	-0.935378	0.0152259	-0.623003	-0.297768	-1.27194
2.05_362.085				362.085		2.05	30	15	15	0	-1.11213	-0.710882	-0.549773	0.274738	-0.294488	-0.905805	-0.298487	0.738604	0.63742	2.2208
2.05_294.131				294.131		2.05	30	15	15	0	-1.01279	0.348116	0.323343	1.98076	0.890814	-1.33932	-1.04918	-0.33489	0.0408723	0.152263
2.04_271.051				271.051		2.04	30	15	15	0	-0.184883	0.130126	1.47223	1.12724	1.375	-0.968396	-0.210872	-1.18351	-0.890547	-0.66639
2.04_191.061				191.061		2.04	33	15	15	3	-0.190883	0.323777	2.35472	0.604173	0.22908	-0.87694	-0.336367	-0.109237	-1.05302	-0.945296
2.03_310.127		C12H22O9	310.126	310.127	-0.62	2.03	30	15	15	0	-0.520596	-0.255055	0.37391	0.337201	2.31386	-0.938865	-0.84752	-0.719748	-0.544534	0.801348
2.02_744.266				744.266		2.02	30	15	15	0	-0.579978	-0.169956	1.674	1.45656	1.011	-0.96375	-0.895598	-0.645904	-0.715107	-0.171259
2.02_494.162				494.162		2.02	30	15	15	0	-0.731973	0.415395	0.173699	0.40858	1.83037	-1.15906	-1.19241	0.384336	0.890258	-1.01919
2.02_356.113				356.113		2.02	30	15	15	0	-0.583173	0.171291	1.23628	1.90516	0.894834	-0.813261	-0.718793	-0.767816	-0.546065	-0.778465
2.02_146.058				146.058		2.02	39	14	15	10	0.200487	-0.651144	2.72196	-0.451479	-0.21796	-0.264131	-0.0480115	-0.290179	-0.168433	-0.831114
2.01_882.262				882.262		2.01	30	15	15	0	-0.527051	-0.0166187	1.77853	1.91758	-0.273558	-0.789008	-0.629454	-0.278409	-0.5135	-0.668507
2.01_448.121				448.121		2.01	30	15	15	0	-0.692142	0.0767044	1.68021	1.90755	-0.082087	-1.09567	-0.616607	-0.368673	-0.370177	-0.439116
2.01_316.079		C13H16O9	316.079	316.079	0.4	2.01	30	15	15	0	-0.361481	0.00993634	2.2121	-0.264545	0.343957	-1.00978	-0.91324	0.66743	-1.13411	0.44973
2.01_204.064				204.064		2.01	40	15	15	10	-0.631088	-0.131621	1.83446	1.27615	0.187648	-1.47324	-0.458699	-0.398479	-0.807811	0.602685
1_261.052				261.052		1	40	15	15	10	0.342185	0.290115	0.373455	-1.24884	-0.936704	-0.00243191	2.26591	-0.220952	0.146107	-1.00884
1_222.038				222.038		1	35	15	15	5	0.634985	-0.389327	-0.166752	0.613172	-1.34817	-0.367804	0.357147	0.144825	-1.44255	1.96447
1_206.042				206.042		1	28	8	11	9	-0.517526	-0.605791	-0.370812	-0.449484	<LOD	2.42035	0.718277	-0.0578513	-0.539083	-0.598076
1_176.032		C6H8O6	176.032	176.032	0.1	1	37	12	15	10	1.41994	-0.544287	1.52147	0.360376	-1.2288	-0.384286	-0.304102	0.93144	-1.05247	-0.719294
1.99_453.181				453.181		1.99	30	15	15	0	-0.369586	0.433028	0.773018	1.69393	1.31973	-0.882904	-0.48593	-0.589149	-0.549555	-1.34258
1.98_287.103				287.103		1.98	35	15	15	5	-0.441852	0.437476	1.38459	1.14073	1.38463	-0.713387	-0.471134	-0.526935	-0.920686	-1.27343
1.98_254.126				254.126		1.98	22	0	12	10	<LOD	<LOD	<LOD	<LOD	<LOD	-1.28311	-0.546113	1.13176	0.864129	-0.16667
1.97_360.105				360.105		1.97	30	15	15	0	-0.741498	0.281533	1.521	1.64604	0.646143	-1.08593	-0.0598961	-0.470875	-0.772744	-0.963774
1.97_326.157				326.157		1.97	30	15	15	0	-0.192045	0.641533	0.823986	1.88622	0.212287	-0.768437	0.4517	-0.680804	-0.876793	-1.49764
1.97_316.115		C14H20O8	316.116	316.115	0.8	1.97	30	15	15	0	-0.0669957	0.0555157	1.51258	1.47699	0.926589	-1.0185	-0.301356	-0.505032	-1.28328	-0.796517
1.97_314.1		C14H18O8	314.1	314.1	0.2	1.97	30	15	15	0	-0.552446	0.310631	1.72872	1.64695	0.38926	-1.08573	-0.438055	-0.521228	-0.813442	-0.664669
1.96_468.146				468.146		1.96	30	15	15	0	0.112522	0.770064	1.86881	0.983577	0.00757743	-0.619958	-0.0824382	-0.462321	-1.23011	-1.34772
1.94_478.116				478.116		1.94	30	15	15	0	0.820956	0.773656	1.69794	1.06783	-0.271834	-0.821972	-0.442985	-0.684989	-1.10419	-1.03442
1.94_381.163				381.163		1.94	30	15	15	0	0.180115	0.241051	2.21487	1.0145	0.0735362	-0.894894	-0.666969	-0.45524	-0.681165	-1.02581
1.93_497.155				497.155		1.93	30	15	15	0	-0.913675	-0.149681	0.365612	2.01324	1.43211	-0.911562	-0.36384	-0.55597	-0.131871	-0.784364
1.93_383.106				383.106		1.93	33	15	15	3	-0.631997	0.175971	2.03855	1.0605	0.193265	-1.21683	0.386519	-0.612327	-1.06814	-0.325514
1.93_332.111				332.111		1.93	30	15	15	0	0.939091	-1.10306	-1.04389	-1.03438	-1.07879	0.260929	-0.111985	1.32489	1.05757	0.78963
1.93_314.064				314.064		1.93	30	15	15	0	-0.257483	0.662737	0.910888	0.761458	0.229169	-0.841066	-0.938446	1.70144	-1.29586	-0.932842
1.93_294.131				294.131		1.93	24	15	9	0	-0.0822324	0.834027	0.857904	2.00825	0.402673	-0.921843	-0.503451	-0.878603	-0.952355	-0.764367
1.92_482.106				482.106		1.92	29	15	14	0	0.582749	1.14692	1.17761	0.58572	0.840754	-0.488007	-0.206167	-0.853759	-1.48862	-1.2972
1.92_400.16				400.16		1.92	28	14	14	0	-0.676933	-0.253277	-0.0801671	0.0128405	-0.689879	-0.781053	-0.552854	-0.292727	0.790354	2.5237
1.92_366.062				366.062		1.92	30	15	15	0	-0.520734	0.480255	2.50679	-0.27836	0.309168	-0.932831	-0.793102	0.17202	-0.655391	-0.287811
1.92_354.152				354.152		1.92	28	14	14	0	-0.527642	0.62987	1.528	1.41422	-0.617726	-0.797964	0.811659	-0.629701	-0.533171	-1.27755
1.92_346.125				346.125		1.92	30	15	15	0	0.354116	0.685165	1.8048	1.10069	0.141746	-0.66738	-0.48886	-0.506848	-1.07307	-1.35036
1.91_456.184		C18H32O13	456.184	456.184	0.29	1.91	30	15	15	0	-0.471945	0.489683	0.61672	2.10733	0.591085	-0.680536	0.0502382	-0.465414	-0.816759	-1.4204
1.91_355.999				355.999		1.91	30	15	15	0	0.428329	0.79625	2.3227	-0.430066	-0.153692	-0.674712	-0.0589827	-0.188967	-1.05239	-0.98847
1.91_334.97				334.97		1.91	30	15	15	0	1.33003	0.772173	1.17849	-0.691214	0.450329	-0.206227	0.424789	-0.386709	-1.24922	-1.62244
1.91_306.017				306.017		1.91	30	15	15	0	0.652155	0.668181	2.05043	-0.592051	-0.0435845	-0.427502	0.343942	-0.0981856	-1.29832	-1.25507
1.91_278.022				278.022		1.91	29	15	14	0	0.854115	0.87589	1.80256	-0.728594	-0.0231674	-0.364172	0.323689	-0.220929	-0.897201	-1.62219
1.89_542.051				542.051		1.89	30	15	15	0	0.426743	0.551992	1.27165	0.757755	1.35914	-1.02312	-0.513425	-0.806292	-1.49441	-0.530024
1.89_492.069				492.069		1.89	30	15	15	0	0.310161	0.8311	0.65211	0.710291	1.76751	-0.920755	-0.558801	-0.68592	-1.44764	-0.658047
1.89_475.017				475.017		1.89	30	15	15	0	0.49778	0.590226	1.32243	0.603411	1.35344	-0.982368	-0.340945	-0.860932	-1.44773	-0.735318
1.89_464.074				464.074		1.89	30	15	15	0	0.459968	0.674046	0.904667	0.463397	1.77075	-1.04805	-0.352396	-0.840427	-1.30926	-0.722698
1.89_446.064				446.064		1.89	30	15	15	0	0.411839	0.857355	1.2484	0.82471	1.11048	-0.850581	-0.408938	-0.98268	-1.50767	-0.702909
1.89_398.082				398.082		1.89	30	15	15	0	0.517074	0.541498	1.64617	0.799553	0.845895	-1.0313	-0.535117	-0.685908	-1.46954	-0.628324
1.89_322.126				322.126		1.89	29	15	14	0	-0.827502	0.0537294	2.17603	-0.00458358	0.881183	-0.984896	-0.839603	0.659591	-0.744415	-0.369539
1.89_230.025				230.025		1.89	30	15	15	0	-0.069384	0.817272	1.29322	1.09272	1.08129	-0.803161	-0.381652	-1.04515	-1.46061	-0.524555
1.86_513.184				513.184		1.86	26	13	13	0	-0.85758	-0.603538	-0.318835	-0.142732	-0.279398	-0.759226	-0.266903	-0.189658	0.942238	2.47563
1.85_466.131				466.131		1.85	30	15	15	0	-0.290425	0.956942	1.23051	1.53143	0.473617	-0.640099	-0.22371	-0.643963	-0.901056	-1.49325
1.85_450.996				450.996		1.85	30	15	15	0	0.234059	0.622464	0.0132735	-0.116822	2.50268	-0.412029	-0.877941	-0.840069	-0.582379	-0.543235
1.85_440.061				440.061		1.85	30	15	15	0	0.123203	0.116647	1.77662	0.956101	0.803279	-1.06705	-0.271354	-0.942683	-0.0271679	-1.4676
1.85_422.044				422.044		1.85	30	15	15	0	0.213988	0.516287	-0.0113627	-0.0821499	2.53783	-0.348426	-0.79334	-0.94902	-0.569062	-0.514742
1.85_420.125				420.125		1.85	30	15	15	0	-0.016002	1.29595	1.25571	1.24254	0.382792	-0.60188	-0.400578	-0.692667	-1.16136	-1.30451
1.85_420.067				420.067		1.85	30	15	15	0	-0.0167528	0.771361	0.103373	-0.340072	2.51495	-0.477908	-0.815211	-0.746103	-0.425687	-0.567951
1.85_117.079				117.079		1.85	40	15	15	10	-0.329132	-0.0542319	2.57408	0.335505	0.217085	-0.959178	-0.696212	-0.059749	-0.225726	-0.802439
1.84_523.037				523.037		1.84	30	15	15	0	0.975247	-0.764117	-0.988632	0.228581	1.23983	-0.181604	1.59641	-1.04821	0.0451658	-1.10268
1.84_494.085				494.085		1.84	30	15	15	0	0.608534	-0.903182	-1.09698	0.244423	1.88838	-0.221116	1.27124	-0.471887	-0.322942	-0.996466
1.84_436.031				436.031		1.84	30	15	15	0	0.237776	0.899389	0.45244	-0.0901804	2.22066	-0.439285	-1.01785	-0.943236	-0.681003	-0.638709
1.84_378.116				378.116		1.84	30	15	15	0	0.220643	0.19138	2.00697	1.40856	-0.357937	-0.889644	-0.372814	-0.46346	-0.638266	-1.10543
1.84_374.061				374.061		1.84	30	15	15	0	0.219335	0.716458	0.920869	-0.0636022	2.09129	-0.490412	-0.948459	-1.04533	-0.697026	-0.70313
1.84_339.095				339.095		1.84	30	15	15	0	-0.976033	-0.660901	-0.520257	-0.521479	-0.751343	-0.787052	0.194559	0.806883	1.49608	1.71955
1.84_332.111				332.111		1.84	30	15	15	0	0.302281	0.103983	1.98601	1.36726	-0.220529	-1.06614	-0.416698	-0.279637	-0.702486	-1.07404
1.84_306.081				306.081		1.84	30	15	15	0	0.0700487	0.984521	0.597635	-0.122838	2.16708	-0.586712	-1.02818	-0.773044	-0.428189	-0.880323
1.83_691.116				691.116		1.83	30	15	15	0	0.340019	0.85533	1.65903	1.22383	-0.262494	-0.435591	-0.225389	-0.687988	-1.03658	-1.43017
1.83_478.037				478.037		1.83	30	15	15	0	0.673359	-0.979935	1.01593	1.70255	0.883849	-0.847236	-0.0433336	-0.673233	-0.548491	-1.18346
1.83_426.04				426.04		1.83	30	15	15	0	0.0176956	1.69089	1.19049	0.598318	0.63889	-0.595712	-0.320923	-1.02708	-0.953628	-1.23894
1.83_312.142		C12H24O9	312.142	312.142	0.03	1.83	28	13	15	0	-0.751033	-1.27804	-0.835703	-0.376477	-0.562275	-0.429146	0.778116	1.84967	0.530857	1.07403
1.83_306.092				306.092		1.83	30	15	15	0	0.0679221	1.25356	1.75337	0.965144	-0.35291	-0.55565	-0.183057	-0.799352	-1.03442	-1.11461
1.83_296.066				296.066		1.83	30	15	15	0	0.272326	1.17815	1.97151	0.629282	-0.20079	-0.664042	-0.478598	-0.66703	-0.927501	-1.11331
1.82_573.089				573.089		1.82	29	15	14	0	0.121997	1.54411	1.69015	0.740751	-0.352662	-0.54059	-0.431968	-0.809964	-0.903629	-1.05819
1.82_544.136				544.136		1.82	29	15	14	0	0.0618631	1.52463	1.68241	0.786894	-0.35661	-0.565077	-0.334744	-0.772349	-0.934385	-1.09263
1.82_454.994				454.994		1.82	30	15	15	0	0.29356	1.4622	0.858418	0.799966	0.740201	-0.516085	0.048486	-1.14293	-1.12941	-1.4144
1.82_444.183				444.183		1.82	30	15	15	0	-0.50099	-0.147277	0.811527	2.23321	-0.52362	-1.29104	-0.385568	0.308421	0.367923	-0.872588
1.82_405.011				405.011		1.82	30	15	15	0	0.208013	1.63096	1.16053	0.812106	0.23735	-0.469007	-0.173928	-0.930919	-1.07302	-1.40208
1.82_376.059				376.059		1.82	30	15	15	0	0.205616	1.62848	1.13729	0.863886	0.201639	-0.512097	-0.115454	-0.977129	-1.07973	-1.3525
1.82_348.064				348.064		1.82	36	15	15	6	0.151473	1.66902	1.09216	0.853201	0.29212	-0.531887	-0.145592	-0.941665	-1.11813	-1.32071
1.81_289.075				289.075		1.81	40	15	15	10	-1.05319	-0.824185	1.09635	1.14051	0.0810133	-1.28567	1.06573	1.04933	-0.690021	-0.57987
1.81_243.069				243.069		1.81	40	15	15	10	-1.40907	-0.65901	0.977404	0.930759	0.0724321	-1.1729	1.1698	1.13088	-0.82776	-0.212537
1.81_227.043				227.043		1.81	26	11	15	0	-0.25591	-0.627886	-1.14137	-0.353152	-0.600002	-0.670593	-0.113597	0.518539	1.00569	2.23828
1.8_273.029				273.029		1.8	35	10	15	10	-1.10485	<LOD	0.211105	0.749038	0.552025	-1.0787	1.6389	0.742559	-0.9088	-0.801283
1.8_262.015				262.015		1.8	30	15	15	0	-0.602181	0.174093	1.6587	1.28591	1.08508	-1.24519	-0.732459	-0.579773	-0.690211	-0.353969
1.77_139.063		C7H9NO2	139.063	139.063	0.33	1.77	40	15	15	10	0.0831619	0.973033	1.24996	1.29252	0.887579	-0.892137	-0.891832	-0.896116	-0.898465	-0.907709
1.77_134.058				134.058		1.77	27	15	12	0	-0.0736409	-0.093643	0.684804	0.0389965	2.54507	-0.570005	-0.753471	-0.452848	-0.486457	-0.838809
1.76_432.048				432.048		1.76	28	15	13	0	-0.420157	-0.603874	0.0376754	0.451463	2.17236	-0.284685	-0.923316	-0.85905	-0.726118	1.1557
1.76_316.08		C13H16O9	316.079	316.08	-0.6	1.76	30	15	15	0	-0.519994	-0.75881	0.561258	0.673807	1.47274	-0.242034	-1.23684	-0.520346	-0.978637	1.54886
1.75_362.119				362.119		1.75	30	15	15	0	-0.382948	0.524326	2.32809	0.591682	0.301042	-0.864886	-0.369587	-0.644351	-1.14027	-0.343095
1.75_309.061				309.061		1.75	32	14	15	3	-0.448288	0.0993119	1.77928	1.81466	0.0266788	-0.685234	-0.470238	-0.403307	-0.788157	-0.924712
1.75_273.085				273.085		1.75	33	15	15	3	-0.776442	0.407782	0.964933	2.02141	0.718191	-0.567638	-0.174171	-0.712577	-0.756965	-1.12452
1.75_111.032				111.032		1.75	35	15	15	5	-0.719114	0.430565	0.922662	2.13903	0.540707	-0.596574	-0.226836	-0.670248	-0.729535	-1.09066
1.74_401.107				401.107		1.74	20	0	10	10	<LOD	<LOD	<LOD	<LOD	<LOD	<LOD	-1.01012	0.976155	0.733294	-0.699334
1.74_350.085				350.085		1.74	28	13	15	0	0.0701475	0.455098	0.382037	1.54425	-0.44507	1.31083	0.214898	-0.998388	-1.47654	-1.05727
1.74_304.079				304.079		1.74	30	15	15	0	-0.442638	0.355244	0.428011	1.54609	-0.201474	1.47151	0.21456	-0.991998	-1.3269	-1.05241
1.74_259.153				259.153		1.74	22	0	12	10	<LOD	<LOD	<LOD	<LOD	<LOD	-1.12732	0.118835	1.55666	-0.00801877	-0.540151
1.74_238.051				238.051		1.74	29	15	14	0	-0.649936	-0.495311	2.32482	0.75135	0.159344	-1.24174	-0.666857	-0.188565	-0.393625	0.400526
1.74_202.132				202.132		1.74	40	15	15	10	-0.932766	-0.611122	-0.561123	-0.991244	-0.462541	-0.621226	0.46748	2.02943	1.07138	0.611733
1.74_142.026				142.026		1.74	33	15	15	3	-0.443986	0.468871	0.234954	1.0996	-0.440234	1.6246	0.801303	-1.04694	-1.37999	-0.91817
1.74_114.031				114.031		1.74	29	15	14	0	-0.290501	-0.232967	0.314118	1.42956	-0.409042	1.61094	0.745559	-0.87226	-1.1997	-1.09572
1.73_459.003				459.003		1.73	28	14	14	0	-0.464683	0.532497	1.06937	1.73206	1.08628	-0.79006	-0.614463	-0.888042	-0.787547	-0.875406
1.73_396.036				396.036		1.73	34	15	14	5	0.0732188	-0.0947584	2.52185	0.149197	0.584681	-0.625308	-0.410499	-0.679626	-0.968037	-0.550721
1.73_344.112				344.112		1.73	29	14	15	0	0.798947	-0.0721978	1.42783	1.53187	0.240919	-1.30278	-0.632045	-0.145828	-1.13539	-0.711339
1.73_338.119				338.119		1.73	30	15	15	0	0.147451	0.653526	1.65496	1.34398	0.0157958	-0.726018	-0.122819	-0.395839	-1.31467	-1.25637
1.73_324.142		C13H24O9	324.142	324.142	0.03	1.73	30	15	15	0	-0.261145	-0.251579	1.50149	2.00687	0.13019	0.041243	-0.83296	-0.893431	-0.858256	-0.582422
1.73_290.1				290.1		1.73	30	15	15	0	-1.4897	-0.977577	1.19023	-0.406661	-0.78938	1.70377	0.170312	0.791422	-0.243326	0.0509088
1.73_160.074				160.074		1.73	36	11	15	10	-0.59128	-0.927043	-0.859437	-0.478415	-0.689196	0.55759	1.9368	0.718347	1.09233	-0.759702
1.72_470.162				470.162		1.72	30	15	15	0	-0.683323	0.284389	1.12424	2.06226	0.459179	-1.12368	-0.32237	-0.183277	-0.718336	-0.899082
1.72_424.157				424.157		1.72	30	15	15	0	-0.796628	0.25762	1.13333	1.85427	0.886293	-1.12318	-0.193155	-0.46921	-0.585558	-0.96378
1.72_408.076				408.076		1.72	30	15	15	0	-0.202057	0.900327	1.48006	1.51171	0.324786	-0.607422	-0.42113	-1.02704	-0.826552	-1.13268
1.72_226.095				226.095		1.72	40	15	15	10	-0.936983	-0.737226	0.147967	-0.440884	0.200489	-1.49526	-0.195899	1.92602	1.05329	0.478489
1.68_679.194				679.194		1.68	30	15	15	0	-0.239228	0.687958	1.618	1.74097	-0.394808	-0.496257	-0.361675	-0.611452	-0.859736	-1.08378
1.68_498.158				498.158		1.68	30	15	15	0	-0.0721144	0.806069	1.46158	1.21143	-0.283554	-0.0223772	0.37855	-0.705486	-1.09414	-1.67995
1.68_452.149				452.149		1.68	30	15	15	0	0.128541	0.720272	1.54548	1.18185	-0.209808	-0.0392604	0.265441	-0.844354	-1.18143	-1.56674
1.68_410.051				410.051		1.68	30	15	15	0	-0.192402	0.230652	1.54192	1.1804	1.2422	-0.807494	-0.367322	-0.635361	-1.06879	-1.12379
1.68_406.069				406.069		1.68	30	15	15	0	0.39408	1.19001	0.273554	0.787113	0.933968	-0.387431	0.608875	-0.767387	-1.23952	-1.79326
1.68_404.091				404.091		1.68	33	15	15	3	0.170272	0.0253458	0.250635	0.0991006	2.14825	-0.0482224	0.0187543	-0.96981	0.128584	-1.82291
1.68_360.063				360.063		1.68	30	15	15	0	1.24369	1.1225	0.308841	0.174388	0.0376238	-1.01753	1.26683	-1.1492	-0.737841	-1.24929
1.68_347.12				347.12		1.68	30	15	15	0	-0.850516	-0.0502642	1.09319	0.94781	1.35145	-1.6608	-0.935446	0.0709529	-0.581245	0.614876
1.68_322.125				322.125		1.68	39	15	14	10	-0.161919	0.813787	1.52967	-0.268739	-1.0595	-1.50263	0.799849	0.932156	-1.00189	-0.0807742
1.67_417.147				417.147		1.67	30	15	15	0	2.24463	-1.22105	-0.946731	-0.373835	0.301125	-0.225321	0.22493	-0.644289	-0.237562	0.878104
1.67_328.075				328.075		1.67	13	7	6	0	0.0433512	-1.72251	0.394523	<LOD	<LOD	0.483781	0.800858	<LOD	<LOD	<LOD
1.67_326.076				326.076		1.67	30	15	15	0	0.690548	0.129477	0.814188	0.121361	0.568963	0.425597	1.17729	-1.41483	-0.631971	-1.88062
1.67_324.062				324.062		1.67	29	15	14	0	1.39432	-0.153166	0.883675	-0.136456	1.13856	0.553093	-0.254551	-0.481326	-1.48185	-1.4623
1.67_304.079				304.079		1.67	30	15	15	0	0.587768	1.18841	1.30777	1.07493	-0.153619	-0.939628	0.0784881	-0.730541	-1.11331	-1.30026
1.66_88.052				88.052		1.66	31	6	15	10	-0.064765	<LOD	2.07566	-0.735435	-1.21438	-0.812184	-0.416303	0.482457	0.773507	-0.0885551
1.66_297.006				297.006		1.66	30	15	15	0	-0.508421	0.922499	0.259388	0.405673	2.06988	-0.38615	0.266474	-1.02177	-0.785943	-1.22163
1.66_280.116		C11H20O8	280.116	280.116	-0.2	1.66	30	15	15	0	-0.556512	0.498775	1.09049	1.55006	1.25157	-1.02223	-0.30221	-0.919237	-0.930986	-0.65972
1.66_267.005				267.005		1.66	30	15	15	0	-0.405101	0.967345	0.31084	0.80467	1.81269	-0.363229	0.164854	-0.992706	-0.947122	-1.35224
1.66_259.153				259.153		1.66	22	0	12	10	<LOD	<LOD	<LOD	<LOD	<LOD	-1.02401	0.294696	0.18781	-0.887407	1.42891
1.66_132.042				132.042		1.66	40	15	15	10	0.810302	-1.57634	-0.695384	-1.22278	-0.633369	-0.077594	0.835427	0.653491	1.46826	0.437995
1.65_97.053				97.053		1.65	33	15	15	3	-0.614791	0.918242	1.352	1.37327	0.796944	-0.746427	-0.254105	-0.730886	-0.845748	-1.2485
1.65_95.037				95.037		1.65	33	15	15	3	-0.672634	0.894715	1.35918	1.45548	0.678671	-0.673256	-0.30067	-0.577005	-0.856868	-1.30761
1.65_80.026				80.026		1.65	30	15	15	0	-0.616	0.934361	1.25831	1.40735	0.858134	-0.718738	-0.236743	-0.842012	-0.828431	-1.21623
1.65_633.11				633.11		1.65	30	15	15	0	-0.550892	1.09829	0.704097	1.36565	0.581149	-0.368333	0.644542	-1.01731	-0.922942	-1.53425
1.65_570.054				570.054		1.65	30	15	15	0	-0.402059	1.35492	0.830907	0.961331	0.792034	-0.228232	0.353585	-1.10332	-1.06559	-1.49357
1.65_555.098				555.098		1.65	30	15	15	0	-0.126451	1.33816	0.812125	0.913253	0.660994	-0.250497	0.465239	-1.0669	-1.17888	-1.56704
1.65_541.1				541.1		1.65	30	15	15	0	-0.338436	1.44387	0.434806	0.705669	0.970937	-0.108119	0.624296	-1.20068	-1.01971	-1.51264
1.65_539.124				539.124		1.65	39	15	15	9	-0.375612	1.36183	0.884174	0.869568	0.459675	-0.122547	0.595036	-0.797108	-1.1948	-1.68022
1.65_517.142				517.142		1.65	30	15	15	0	-0.617061	1.22041	1.15286	1.30126	0.357124	-0.335886	0.232008	-0.885548	-1.00235	-1.42281
1.65_492.035				492.035		1.65	30	15	15	0	-0.5814	0.873596	1.31706	1.2932	0.954384	-0.640286	-0.221655	-0.824363	-0.877086	-1.29345
1.65_478.043				478.043		1.65	30	15	15	0	-0.673789	1.0524	1.15193	1.31072	0.990454	-0.673372	-0.268351	-0.798532	-0.869209	-1.22225
1.65_476.066				476.066		1.65	30	15	15	0	-0.549816	0.898523	1.32732	1.38002	0.838936	-0.65705	-0.282563	-0.792325	-0.93732	-1.22573
1.65_404.057				404.057		1.65	30	15	15	0	0.252105	0.850216	0.389359	0.61948	1.72461	0.0776644	-0.215275	-1.0739	-1.14637	-1.47788
1.65_389.017				389.017		1.65	30	15	15	0	0.0241901	1.48104	0.100737	0.102454	0.868926	0.187795	1.03586	-1.23469	-1.05453	-1.51179
1.65_388.079				388.079		1.65	30	15	15	0	-0.813518	0.95581	1.43566	0.63156	-0.269211	-0.845653	0.948834	0.182127	-0.493575	-1.73204
1.65_378.115				378.115		1.65	30	15	15	0	-0.637098	-0.41648	1.67808	0.528453	0.910615	-1.54247	-0.426629	-0.77298	1.08333	-0.404823
1.65_336.106				336.106		1.65	35	15	15	5	-0.276352	1.19697	1.05912	1.18201	0.336063	-0.375559	0.496433	-1.04652	-1.1012	-1.47096
1.65_334.09				334.09		1.65	30	15	15	0	0.0856321	0.722274	1.06808	0.889775	1.39772	-0.345894	-0.236599	-0.910616	-1.24979	-1.42059
1.65_326.965				326.965		1.65	30	15	15	0	-0.78293	0.715138	1.15378	1.03573	1.39572	-0.362644	-0.0363494	-0.91551	-0.850297	-1.35264
1.65_310.996				310.996		1.65	30	15	15	0	-0.527719	0.938987	0.800087	0.641625	1.65274	-0.573797	0.340735	-1.05029	-0.972403	-1.24997
1.65_290.1				290.1		1.65	30	15	15	0	-0.501417	0.836605	1.49663	0.993266	0.227927	-0.197691	0.653606	-0.955047	-1.02128	-1.53259
1.65_288.085				288.085		1.65	34	15	15	4	0.153458	0.753872	1.05814	0.838425	1.43065	-0.350667	-0.351245	-0.892976	-1.24516	-1.39449
1.65_252.063				252.063		1.65	36	15	15	6	-0.420353	0.697636	0.732962	1.837	0.997762	-0.958832	-0.213766	-0.674001	-0.918104	-1.0803
1.65_238.96				238.96		1.65	30	15	15	0	-0.910366	0.213863	0.549721	1.27043	1.81	-0.204443	0.0803987	-0.642506	-0.834613	-1.33249
1.65_236.035				236.035		1.65	30	15	15	0	-0.364327	0.65881	2.1761	0.80892	0.45324	-0.883872	-0.637953	-0.6616	-0.851828	-0.697493
1.65_229.048				229.048		1.65	29	14	15	0	-0.425397	0.771573	1.6899	1.49002	0.261593	-0.908146	-0.486494	-0.56611	-0.793879	-1.03306
1.65_227.043				227.043		1.65	30	15	15	0	-0.560059	0.672684	1.63024	1.68176	0.133825	-0.784365	-0.480623	-0.530009	-0.726929	-1.03652
1.65_183.053				183.053		1.65	30	15	15	0	-0.585232	0.769695	1.5803	1.60084	0.27274	-0.79798	-0.420946	-0.554324	-0.745257	-1.11983
1.65_141.043				141.043		1.65	36	15	15	6	-0.624871	0.775658	1.40826	1.40734	0.821428	-0.711143	-0.200944	-0.863585	-0.843116	-1.16903
1.65_139.063		C7H9NO2	139.063	139.063	0.33	1.65	40	15	15	10	-0.616773	0.885258	1.35528	1.42796	0.745013	-0.687445	-0.257886	-0.735409	-0.850225	-1.26578
1.65_1148.045				1148.05		1.65	30	15	15	0	-0.885126	0.746396	1.13815	1.69276	0.826081	-0.768801	-0.308707	-0.59925	-0.726867	-1.11464
1.65_111.068				111.068		1.65	30	15	15	0	-0.664659	0.850626	1.42354	1.46603	0.634705	-0.670065	-0.26732	-0.723119	-0.78821	-1.26153
1.64_697.163				697.163		1.64	30	15	15	0	-0.799868	0.283469	0.360825	1.94255	0.56879	-1.48015	0.668088	-0.642004	0.0953798	-0.997086
1.64_605.154				605.154		1.64	30	15	15	0	-0.77442	0.447648	1.12778	1.53523	0.945987	-1.28867	0.160389	-0.814378	-0.206442	-1.13312
1.64_603.177				603.177		1.64	30	15	15	0	-0.771473	0.413063	1.12691	1.89246	0.48107	-1.06545	0.149735	-0.55154	-0.458414	-1.21635
1.64_581.195				581.195		1.64	30	15	15	0	-1.01561	-0.0186114	1.16175	2.07786	0.277202	-1.16832	-0.252107	-0.108979	-0.0706713	-0.882503
1.64_452.128				452.128		1.64	30	15	15	0	-1.03243	-0.476891	0.923906	1.76111	-0.488409	-1.49296	-0.101715	0.693348	0.727541	-0.513502
1.64_400.158				400.158		1.64	30	15	15	0	-0.995222	-0.170409	0.869182	2.0278	0.39977	-1.58069	-0.127089	-0.187803	0.315519	-0.551062
1.64_354.152				354.152		1.64	30	15	15	0	-1.03096	-0.145746	0.851797	2.00813	0.415469	-1.57767	-0.0943054	-0.228723	0.356662	-0.554653
1.64_326.077				326.077		1.64	30	15	15	0	1.28706	-0.835292	-1.07168	-0.616985	0.411462	1.15538	0.917092	-0.908137	0.802444	-1.14135
1.64_292.086				292.086		1.64	32	15	13	4	0.182212	1.06421	1.34653	1.46947	-0.280435	-0.666487	-0.123176	-0.523495	-1.2671	-1.20173
1.64_200.014				200.014		1.64	34	15	15	4	-0.237154	-0.381839	2.81399	0.0588538	-0.350532	-0.446195	-0.322496	-0.452661	-0.261688	-0.420274
1.64_162.053		C6H10O5	162.053	162.053	-0.2	1.64	38	15	15	8	-0.517901	-0.118991	1.80263	1.74701	-0.289423	-0.531863	-0.467734	0.243431	-0.814705	-1.05246
1.63_654.235				654.235		1.63	30	15	15	0	-0.0103993	0.077983	1.64235	1.90563	-0.507753	-0.912433	-0.299247	-0.20226	-0.777365	-0.916504
1.63_549.207				549.207		1.63	30	15	15	0	-1.20908	-0.910979	-0.134792	0.458299	1.42084	-1.45016	-0.506239	0.338875	0.978162	1.01508
1.63_499.072				499.072		1.63	30	15	15	0	-0.743079	-0.378417	-0.310266	1.44423	1.5431	-1.68537	-0.0888166	-0.350852	0.836013	-0.26654
1.63_470.122				470.122		1.63	30	15	15	0	0.18787	-0.566263	-1.37761	-0.392541	1.52043	-1.23062	0.385945	-0.551979	0.650087	1.37469
1.63_468.144				468.144		1.63	39	15	15	9	-0.609058	-0.916105	-1.24303	-0.578944	0.602811	-1.02594	1.04819	0.175058	1.51905	1.02797
1.63_417.147				417.147		1.63	30	15	15	0	2.15294	-0.519571	-1.27409	-0.808275	-0.137845	-0.607056	0.81358	-0.554598	0.577529	0.357386
1.63_390.128				390.128		1.63	40	15	15	10	0.0454578	-0.910234	-1.11032	-0.350864	0.650383	-1.49584	0.559981	-0.124211	1.57041	1.16524
1.63_202.046				202.046		1.63	34	15	15	4	1.69535	0.734037	-1.46253	-0.361221	0.759521	-0.535056	0.00156371	0.518445	0.123118	-1.47322
1.62_430.042				430.042		1.62	30	15	15	0	1.68344	0.761794	0.979129	0.242651	0.113077	-0.312193	0.111033	-0.852353	-1.39447	-1.3321
1.61_445.008				445.008		1.61	30	15	15	0	1.61828	1.09203	0.542003	0.122361	0.587724	0.0834091	-0.511111	-1.04835	-1.4385	-1.04785
1.61_416.055				416.055		1.61	30	15	15	0	1.75153	0.557864	0.636226	0.146239	0.765569	-0.132533	-0.072459	-0.913142	-1.36039	-1.37891
1.61_320.111				320.111		1.61	30	15	15	0	-0.608297	-0.0182245	2.56138	-0.857515	0.19391	-0.0485533	-0.995309	0.259878	-0.00200277	-0.485271
1.61_312.142		C12H24O9	312.142	312.142	0.03	1.61	30	15	15	0	-0.508963	0.652845	0.811878	1.54486	1.24582	-0.743478	0.0476409	-0.922876	-0.911248	-1.21648
1.61_214.095				214.095		1.61	22	0	12	10	<LOD	<LOD	<LOD	<LOD	<LOD	-1.58406	0.0624506	0.856441	0.848408	-0.183244
1.6_475.079				475.079		1.6	33	11	12	10	-0.222672	-0.385134	0.261496	-0.0948499	2.62137	-0.824271	-0.38544	-0.131949	0.153519	-0.992064
1.6_406.099				406.099		1.6	30	15	15	0	-0.330383	0.163567	1.14845	0.369169	2.0608	-1.08896	-0.900379	-0.855308	-0.653062	0.0860998
1.6_352.1				352.1		1.6	30	15	15	0	0.639911	1.82691	0.999767	0.866037	-0.589819	-0.381816	-0.528876	-0.76392	-0.972093	-1.0961
1.6_308.113				308.113		1.6	30	15	15	0	-0.59373	1.00523	0.657767	1.41962	1.06186	-0.537596	0.23207	-0.880325	-0.911074	-1.45382
1.6_280.116		C11H20O8	280.116	280.116	-0.2	1.6	30	15	15	0	-0.316123	0.105134	1.06081	1.84451	1.13473	-0.760199	-0.486156	-0.753696	-0.817252	-1.01176
1.6_130.063		C6H10O3		130.063		1.6	29	15	14	0	-0.388413	-0.150125	2.16077	0.418403	1.08878	-0.971837	-0.618692	0.00958625	-1.1423	-0.406177
1.59_548.142				548.142		1.59	29	10	10	9	-0.40208	-0.257059	2.46114	-0.144057	<LOD	-0.479164	-0.40735	-0.41015	-0.361282	<LOD
1.59_538.123				538.123		1.59	39	15	15	9	-0.144111	-0.5714	-0.602908	-0.599401	-1.16401	0.442981	1.6016	1.82729	-0.109845	-0.680191
1.59_446.127				446.127		1.59	23	0	13	10	<LOD	<LOD	<LOD	<LOD	<LOD	-0.913887	0.246419	0.722358	1.10851	-1.1634
1.59_414.111				414.111		1.59	21	0	11	10	<LOD	<LOD	<LOD	<LOD	<LOD	<LOD	-0.891649	-0.837869	0.804261	0.925258
1.59_354.113				354.113		1.59	26	6	10	10	-0.702617	0.630121	<LOD	-0.566781	<LOD	-1.55598	0.220293	0.558412	1.41655	<LOD
1.59_338.12				338.12		1.59	30	15	15	0	0.118154	1.28949	0.947719	1.65902	-0.795198	-0.79863	-0.189353	-0.08703	-0.898305	-1.24587
1.59_336.106				336.106		1.59	35	15	15	5	-0.369765	1.51455	0.78212	1.23536	-0.0437783	-0.48851	0.560613	-0.944174	-0.642548	-1.60387
1.59_311.009				311.009		1.59	38	13	15	10	-0.833231	-0.680037	-0.71863	-0.716735	-0.820047	-0.307637	1.63709	1.1712	1.40547	-0.137445
1.59_295.038				295.038		1.59	40	15	15	10	-0.860153	-0.443238	-0.511279	-0.50962	-1.04223	-0.428596	1.80858	1.07206	1.30406	-0.389579
1.59_281.049				281.049		1.59	30	5	15	10	-1.13497	-0.605238	-0.80417	-0.369583	<LOD	-0.561186	1.54581	0.909002	1.37936	-0.359019
1.59_233.065				233.065		1.59	36	11	15	10	-0.784952	-0.597514	-0.932003	-0.690167	<LOD	-0.474511	1.52825	1.09923	1.30623	-0.45456
1.59_162.053		C6H10O5	162.053	162.053	-0.2	1.59	38	15	15	8	-0.642559	-0.121952	1.74645	1.7103	-0.0927796	-0.885191	-0.0518054	0.131737	-0.601073	-1.19312
1.58_430.168				430.168		1.58	30	15	15	0	-0.701325	0.156668	0.742339	1.85078	0.941881	-1.10685	-0.884223	-0.284532	0.441579	-1.15632
1.58_426.069				426.069		1.58	35	15	15	5	-0.401995	0.38781	0.471252	0.61232	2.3223	-0.88647	-0.467611	-0.963516	-0.843838	-0.230248
1.58_416.056				416.056		1.58	30	15	15	0	0.719931	0.0850447	1.60891	-0.139154	0.139056	-0.136469	1.22304	-1.26006	-1.46331	-0.776989
1.58_375.115				375.115		1.58	30	15	15	0	-0.462147	0.638205	0.940881	0.978947	1.25952	-0.851731	0.653382	-0.691015	-0.859796	-1.60625
1.58_368.078				368.078		1.58	30	15	15	0	-0.977157	-0.452454	1.52625	1.62069	0.28074	-1.25575	-0.855058	0.483965	-0.497375	0.126146
1.58_322.061				322.061		1.58	38	14	15	9	-0.405242	-1.51832	0.690927	-0.348895	-0.652856	-0.817349	1.81357	0.901081	0.75133	-0.414248
1.58_307.128				307.128		1.58	33	15	15	3	-0.20108	0.763006	0.891092	1.56686	1.02153	-0.637967	-0.184036	-0.800794	-1.0121	-1.40651
1.58_253.071				253.071		1.58	35	10	15	10	-0.794548	-0.829661	-0.757139	-0.776268	<LOD	1.08767	1.86941	0.545899	0.311634	-0.657002
1.57_463.073				463.073		1.57	39	15	14	10	0.529977	2.01394	-0.340858	-0.420527	1.17595	-1.19432	0.147014	-0.174646	-0.845354	-0.891168
1.57_398.089				398.089		1.57	29	15	14	0	-0.63594	-0.348174	1.09776	1.01614	1.86957	-1.00622	-0.753567	-0.612963	-0.856007	0.229397
1.57_396.034				396.034		1.57	34	15	15	4	0.0012747	-0.021144	0.0113201	0.574067	2.41478	-0.929628	-0.943654	-0.879921	-0.490347	0.263248
1.57_364.096				364.096		1.57	30	15	15	0	-0.239389	-0.188642	0.43802	0.638723	2.39932	-0.973025	-0.702063	-0.90682	-0.53299	0.0668665
1.57_352.137				352.137		1.57	19	0	9	10	<LOD	<LOD	<LOD	<LOD	<LOD	<LOD	<LOD	-0.162778	-0.908625	1.0714
1.57_338.078				338.078		1.57	33	15	15	3	-0.102914	-0.218563	0.143668	1.57734	1.6291	-1.03811	0.421237	-0.937258	-1.26563	-0.208874
1.57_296.111				296.111		1.57	33	15	15	3	-0.447855	-0.136501	0.81735	0.827913	2.01888	-1.11266	-0.958925	-0.778714	-0.644441	0.41495
1.57_253.058				253.058		1.57	40	15	15	10	-0.768258	-0.7523	-0.677623	-0.72801	-0.689724	1.20328	2.01292	0.603186	0.395598	-0.599067
1.57_220.058				220.058		1.57	28	8	11	9	0.83457	0.641167	1.83371	-1.11169	<LOD	-0.439604	0.281744	-0.156281	-0.607873	-1.27573
1.57_116.047				116.047		1.57	27	7	10	10	-0.00459158	<LOD	-0.932086	-1.33375	1.78687	-0.438169	<LOD	0.26976	-0.258015	0.909977
1.56_469.024				469.024		1.56	30	15	15	0	-2.23975	-0.0606225	0.279209	0.757779	0.895621	-0.895429	0.377603	-0.490301	1.1319	0.243995
1.56_412.067				412.067		1.56	30	15	15	0	-0.425015	-0.000749863	2.1707	0.903726	0.453544	-0.867958	-0.301063	-0.530005	-0.00314086	-1.40004
1.56_369.105				369.105		1.56	30	15	15	0	0.168551	0.97459	1.95306	0.15073	0.790417	-0.44409	-0.616605	-1.0952	-1.02136	-0.860098
1.55_537.12				537.12		1.55	30	15	15	0	2.15232	0.643717	0.371272	0.216677	-1.40164	0.00666873	0.15937	-0.515253	-0.517178	-1.11596
1.55_380.088		C21H16O7	380.09	380.088	1.6	1.55	29	15	14	0	-0.501552	1.01634	0.15795	1.5504	1.17545	-0.407588	0.305481	-1.01845	-1.05623	-1.22181
1.55_351.099				351.099		1.55	30	15	15	0	-0.580104	0.952906	0.777712	1.6805	0.959102	-0.736565	-0.169519	-0.863262	-0.854836	-1.16594
1.55_310.126				310.126		1.55	39	15	15	9	-0.354771	0.731875	0.979129	1.70617	0.823272	-0.570992	-0.201502	-0.707086	-1.08111	-1.32498
1.54_406.102				406.102		1.54	30	15	15	0	-0.27688	-0.0323775	0.271363	0.15123	2.26291	-1.43088	0.70959	-0.952487	-0.343814	-0.358654
1.54_386.141				386.141		1.54	30	15	15	0	-0.671328	0.256851	1.37998	1.91617	-0.34122	-1.16702	0.156699	-0.203573	-0.171834	-1.15473
1.54_204.062				204.062		1.54	40	15	15	10	-0.536173	0.892994	0.0365334	1.65877	1.0801	-0.941092	0.188374	-0.118032	-0.629028	-1.63244
1.53_447.019				447.019		1.53	30	15	15	0	-0.379958	0.738525	0.478033	0.921226	0.399714	-1.44103	1.03591	0.745237	-0.895924	-1.60173
1.53_418.068				418.068		1.53	30	15	15	0	-1.17717	1.74975	0.804888	0.481067	1.11469	-0.971489	0.0520737	-0.546057	-0.911174	-0.596578
1.53_416.091				416.091		1.53	30	15	15	0	-0.320271	0.822487	1.34817	0.876205	1.1414	-1.68838	-0.444709	-0.775283	-0.145935	-0.813687
1.53_348.106				348.106		1.53	30	15	15	0	-0.158636	0.634829	1.73058	1.48588	0.245675	-1.06996	-0.591081	-0.520706	-0.895301	-0.861282
1.52_659.225				659.225		1.52	30	15	15	0	-0.52545	0.118919	0.378845	1.07169	2.11932	-0.523933	0.158881	-0.875765	-1.03708	-0.885427
1.52_326.119				326.119		1.52	40	15	15	10	-1.58292	-0.847163	-0.325694	-0.119131	-0.609846	-0.41113	0.931727	1.78621	1.01503	0.162919
1.52_298.128				298.128		1.52	30	15	15	0	-0.928498	-1.02567	0.642227	1.12654	-1.39467	-0.818115	0.519817	1.56176	0.0348195	0.281784
1.51_438.131				438.131		1.51	24	8	6	10	-0.65712	0.0497575	0.578839	1.99159	0.192671	<LOD	<LOD	-0.0991671	-0.801864	-1.25471
1.51_340.136				340.136		1.51	30	15	15	0	-0.857159	0.0329605	1.44134	1.8962	0.611876	-0.75233	-0.269785	-0.536855	-0.605372	-0.960877
1.51_212.079				212.079		1.51	39	14	15	10	-1.65277	-0.105147	-0.463031	0.506932	1.36603	-1.52411	0.593724	0.0175268	0.15646	1.10439
1.5_477.183				477.183		1.5	30	15	15	0	-0.866916	0.487161	0.997656	1.90075	0.0625258	-0.667515	-0.362203	0.0537973	0.0722848	-1.67754
1.5_370.147				370.147		1.5	30	15	15	0	-0.143385	2.563	-0.427004	-0.390462	0.05786	0.108025	-0.679931	-1.09018	0.453717	-0.451642
1.5_204.009				204.009		1.5	39	15	15	9	-0.305152	0.986523	2.29622	0.154046	-0.862747	-0.962214	-0.0932093	0.0303125	-0.925192	-0.318591
1.5_190.048				190.048		1.5	35	15	15	5	0.756599	0.582508	1.95368	0.589669	-1.08467	-0.47133	-0.0801227	-0.00220335	-1.13852	-1.10561
1.5_160.019				160.019		1.5	30	15	15	0	0.135585	1.33917	1.96716	-0.264371	-1.2486	-0.422576	0.299019	-0.224594	-1.03713	-0.543664
1.49_540.168				540.168		1.49	20	9	3	8	-1.19041	0.0303788	-0.01263	1.02172	<LOD	<LOD	<LOD	1.19942	<LOD	-1.04848
1.49_376.022				376.022		1.49	25	12	13	0	1.17957	0.753214	2.02307	-0.777856	-0.829635	-0.443069	0.0986666	-0.493072	-0.575737	-0.935147
1.49_348.152				348.152		1.49	30	15	15	0	-1.21615	-0.47712	0.870528	1.27827	1.38631	-1.35725	-0.851292	-0.301294	0.111532	0.556472
1.49_341.984				341.984		1.49	30	15	15	0	-0.123619	1.28944	1.47255	-0.461339	-0.547478	0.0108504	1.26192	-0.59821	-1.01758	-1.28654
1.49_320.955				320.955		1.49	30	15	15	0	0.294977	1.24424	1.18554	-0.671666	0.240664	0.238225	1.03587	-1.00742	-1.1624	-1.39802
1.49_264.006				264.006		1.49	30	15	15	0	-0.0945544	1.08122	1.07174	-0.516834	0.0811801	-0.0130636	1.62834	-0.871465	-0.876446	-1.49011
1.49_176.032		C6H8O6	176.032	176.032	0.1	1.49	28	12	13	3	1.95143	0.172995	1.6287	-0.515423	-0.251897	-0.82854	-0.152368	-0.558515	-0.485969	-0.960417
1.48_292.001				292.001		1.48	30	15	15	0	-0.047782	1.26005	1.02381	-0.329767	-0.143725	0.171954	1.45927	-0.848463	-1.03383	-1.51151
1.47_222.056				222.056		1.47	30	15	15	0	-0.46597	0.772555	1.48668	1.59678	0.322472	-0.790734	-0.188378	-0.605989	-0.93881	-1.18861
1.46_488.173				488.173		1.46	30	15	15	0	-0.614274	0.291165	0.995509	2.12547	0.656181	-0.931817	-0.501433	-0.411718	-0.718298	-0.89078
1.46_380.041				380.041		1.46	30	15	15	0	0.460672	0.0561723	1.83791	0.996214	0.556449	-0.518541	-0.12937	-0.694287	-1.12967	-1.43555
1.46_253.059				253.059		1.46	39	14	15	10	-0.423166	-0.146265	-0.275217	-0.392129	-0.180153	-0.469838	-0.45705	-0.471402	2.80814	0.00707963
1.46_132.043				132.043		1.46	40	15	15	10	0.0527163	-0.23066	2.47264	-0.0775219	-0.453751	-0.519306	0.881242	-0.551951	-0.665303	-0.908101
1.44_397.043				397.043		1.44	30	15	15	0	0.317373	0.0570019	1.49285	1.40705	-0.99375	-1.46233	0.0879104	0.29955	0.00440364	-1.21006
1.44_368.091				368.091		1.44	30	15	15	0	-0.172753	-0.00793037	1.25365	1.66904	-1.31297	-1.15155	0.783881	0.256052	-0.572235	-0.745182
1.44_252.121				252.121		1.44	29	14	15	0	-0.434335	-0.264847	2.20374	0.992898	0.117236	-1.30667	-0.0650572	0.238833	-0.644372	-0.837422
1.43_686.189				686.189		1.43	30	15	15	0	-0.719883	0.210714	1.07681	1.72382	1.26056	-0.836078	-0.711111	-0.474941	-1.00653	-0.523364
1.43_283.092				283.092		1.43	40	15	15	10	-0.386014	-0.248161	2.64996	-0.600712	-0.566533	-0.195844	0.639453	-0.218181	-0.45406	-0.619908
1.43_266.1				266.1		1.43	40	15	15	10	-0.946198	0.0211202	1.13168	-0.56362	-0.69269	-0.86135	2.04693	0.805758	-0.4993	-0.442336
1.42_305.112				305.112		1.42	30	15	15	0	0.147934	0.843692	1.6193	0.638302	0.936487	-0.77716	-0.557867	-0.29215	-1.48682	-1.07172
1.42_304.079				304.079		1.42	30	15	15	0	-0.558446	0.846045	1.28835	1.27857	0.946287	-0.705066	-0.192275	-0.527482	-0.916587	-1.4594
1.42_257.138				257.138		1.42	39	14	15	10	-1.34969	-0.898474	-0.533984	-0.213721	-0.29585	-0.726865	0.180941	1.68443	1.42026	0.732961
1.41_486.117				486.117		1.41	30	15	15	0	-0.704537	0.606409	1.12519	1.87462	0.25297	-1.18207	0.168675	-0.686548	-0.317176	-1.13752
1.41_433.155				433.155		1.41	35	13	15	7	-0.545618	1.01071	0.821356	1.8996	-0.883441	-0.597938	0.437857	-0.395147	-0.434876	-1.31251
1.41_416.151				416.151		1.41	30	15	15	0	-0.671064	0.442573	1.38843	1.98005	-0.243043	-1.06658	0.0195391	-0.504722	-0.399747	-0.94544
1.41_370.147				370.147		1.41	30	15	15	0	-0.665566	0.606692	1.37244	1.85756	-0.133797	-1.15485	0.10263	-0.669463	-0.358617	-0.957038
1.4_484.139				484.139		1.4	34	15	15	4	-0.840385	0.267148	1.35468	2.02094	-0.522846	-1.06246	-0.0224397	-0.216292	-0.0561725	-0.922178
1.4_406.121				406.121		1.4	36	13	15	8	-1.10309	0.146593	1.76415	1.54082	0.0392348	-1.18461	-0.444035	0.133481	-0.0876692	-0.80488
1.4_143.058				143.058		1.4	39	14	15	10	-0.772338	-0.639183	-0.58227	-0.793741	-0.755411	0.6782	2.25229	0.87113	0.125736	-0.384416
1.39_90.031				90.031		1.39	30	15	15	0	-0.670438	1.10099	1.40699	1.69627	-0.0457685	-0.723922	-0.824416	-0.575798	-0.598654	-0.765257
1.39_449.002				449.002		1.39	30	15	15	0	-0.718599	1.24525	0.96785	1.36197	0.998517	-0.788993	-0.500667	-0.87039	-0.651137	-1.0438
1.39_434.037				434.037		1.39	30	15	15	0	-0.873691	0.850211	0.814708	1.36236	1.34382	-0.780671	-0.0492809	-0.878139	-0.574992	-1.21432
1.39_420.048				420.048		1.39	30	15	15	0	-0.650979	1.09149	1.08383	1.6958	0.512683	-0.886001	-0.482061	-0.620237	-0.600367	-1.14416
1.39_404.003				404.003		1.39	30	15	15	0	-0.739087	0.846237	0.460122	1.73583	1.3302	-0.769182	-0.53997	-0.800147	-0.590768	-0.933235
1.39_372.066				372.066		1.39	30	15	15	0	-0.486503	0.819489	1.25352	1.45935	0.954461	-0.957252	-0.45518	-0.773433	-0.670702	-1.14375
1.39_350.085				350.085		1.39	30	15	15	0	-0.27471	0.660376	1.39495	1.94636	-0.391577	-0.691523	-0.549793	-0.253258	-0.744382	-1.09644
1.37_313.101				313.101		1.37	38	15	15	8	-0.474232	-1.11112	0.530461	-0.562455	-0.196342	-0.104919	2.40898	0.539288	-0.14801	-0.881649
1.37_135.054				135.054		1.37	40	15	15	10	-0.631917	-0.992604	0.0814772	-0.780168	-0.459482	0.347042	2.3772	0.719873	0.0438022	-0.705224
1.36_359.089				359.089		1.36	38	15	15	8	-0.769508	-0.677362	-1.13796	-0.694371	-0.590633	1.07405	1.98275	0.843022	0.101334	-0.131324
[truncated: 226 more rows]
