# Supplementary material for: Regulation of pectin remodeling and ectomycorrhiza development by cell wall localized proanthocyanidins in hybrid aspen roots
Source: Research Square preprint supplement (doi:10.21203/rs.3.rs-6966375/v1), 2025-07-04
Supplement: Supplementary file 10 [file ffd10a731b4daa64ae7501e3.xlsx]

## Sheet: Table S10
Table S10 – Primers used in qRT-PCR Analysis. Refers to Figure S4 and S5 and Tables S7 and S9.
This table lists the primer sequences used for quantitative reverse transcription PCR (qRT-PCR) analysis. For each primer pair, the table provides the forward and reverse primer sequences, gene ID, and reference where applicable.
Primer	Sequence	Gene ID	Source
PtSUT_F	AGAAACAAAGCAAGTTCCAATAGAGG	Potra003381g21506	This study
PtSUT_R	TCTACAGAAATGTAATCGAAAGGA
PF6.2_F	CATGGTCCAACTCACCACCA	Lacbi2_469385	Chowdhury et al., 2022
PF6.2_R	GTGCTTCCAGTGCATCGTTG
Aquaporin_F1	TGCGGTACCCGCGATTTCTTTG	Lacbi2_671860	Chowdhury et al., 2022a
Aquaporin_R1	TCAATGCGAACAAACGGCAACC
LbPME1_F	GGGTTATCTGCCAAACAAACTG	Lacbi2_245379	Chowdhury et al., 2022a
LbPME1_R	CCATACTGGCTAATTGCGATGG
EF1β_F	AAGAGGACAAGAAGGCAGCA	Potri.001G224700	Zhao et al., 2017
EF1β_R	CTAACCGCCTTCTCCAACAC
Act_F	CCCATTGAGCACGGTATTGT	Potri.001G309500	Ma et al., 2018
Act_R	TACGACCACTGGCATACAGG
elF4_F	TGGGGCCTCTATTTAGCATGGAT	Potri.006G225700	Hamel et al., 2011
elF4_R	CTGCACCCGAAATGGGATTGACC
PAL_F	GTACAAGTTTGTGAGGGAAGAATTGG	Potri.008G038200	James et al., 2017
PAL_R	AGAGGAAGAGGAGCGCCATT
CHS1_F	TGTGTGAATACATGGCTCCGTCTCT	Potri.014G145100	James et al., 2017
CHS1_R	GGATTTTGGCTGACCCCACTCTT
C4H2_F	TCCACCATTGTTGCAAAGCCA	Potri.019G130700	James et al., 2017
C4H2_R	CATAGATTTACAGCCACAGCTCCC
F3´5´H1(CYP75A12)_F	GCAACGGCTCATGAACGCAAGG
F3´5´H1(CYP75A12)_R	ATGCTCGAGGAAGTGTCAGTGC	Potri.009G069100	Ma et al., 2018
MYB115_F	GGATTGTGATAATGGGGTTGCC	Potri.002G173900	James et al., 2017
MYB115_R	GTGACTCGGCGAAGGAGTTT
MYB165_F	CAGCCGACAAAGTCCCGC	Potri.010G114000	Ma et al., 2018
MYB165_R	TGTGGCCTCAAAAAATTAGACTCGTT
ANS1_F	GCGAGCAAAATTCTGTCAGC	Potri.001G113100	James et al., 2017
ANS1_R	TCATAGAAGAGTTGCAGGC
ANR1_F	GCTACCCTGCCTCCAAGACA	Potri.004G030700	James et al., 2017
ANR1_R	CGTGCGTGATTGAGATCGAGCC
UBQ (Lb446085-F)	CAAAGCCGCCTACGCCTAAA	Lacbi2_446085	Daguerre et al. 2017
UBQ (Lb446085-R)	GGCATAGTGCCTGCATCGAG
EF3 (Lb659644-F)	CAAGGAGAAGAGTCTGCTTAAGATGC	Lacbi2_659644	This study
EF3 (Lb659644-R)	CGTTGGGACCGAGAACGGCAACAC
MetalloProtease (Lb473056-F)	GCAAACTTGATGATCCAACGACC	Lacbi2_473056	Plett et al. 2011
MetalloProtease (Lb473056-R)	GCAACATCACGGTATGTTCTCAGC
References
Amy Midori James, Dawei Ma, Robin Mellway, Andreas Gesell, Kazuko Yoshida, Vincent Walker, Lan Tran, Don Stewart, Michael Reichelt, Jussi Suvanto, Juha-Pekka Salminen, Jonathan Gershenzon, Armand Séguin, C. Peter Constabel. 2017. Poplar MYB115 and MYB134 Transcription Factors Regulate Proanthocyanidin Synthesis and Structure, Plant Physiology 174, 154–171.
Chowdhury J., Kemppainen M., Delhomme N., Shutava I., Zhou J., Takahashi J., Pardo A. G., & Lundberg-Felten J. (2022a). Laccaria bicolor pectin methylesterases are involved in ectomycorrhiza development with Populus tremula × Populus tremuloides. New Phytologist, 236(2), 639-655.
Daguerre Y, Levati E, Ruytinx J, Tisserant E, Morin E, Kohler A, Montanini B, Ottonello S, Brun A, Veneault-Fourrey C, Martin F. 2017. Regulatory networks underlying mycorrhizal development delineated by genome-wide expression profiling and functional analysis of the transcription factor repertoire of the plant symbiotic fungus Laccaria bicolor. BMC Genomics 18:737.
Hamel L-P, Benchabane M, Nicole M-C et al., 2011. Stress-responsive mitogen-activated protein kinases interact with the EAR motif of a poplar zinc finger protein and mediate its degradation through the 26S proteasome. Plant Physiology 157, 1379–93.
Ma D, Reichelt M, Yoshida K, Gershenzon J, Constabel CP. Two R2R3-MYB proteins are broad repressors of flavonoid and phenylpropanoid metabolism in poplar. Plant J. 2018 Dec;96(5):949-965. Epub 2018 Oct 8. PMID: 30176084.
Plett JM, Kemppainen M, Kale SD, Kohler A, Legué V, Brun A, Tyler BM, Pardo AG, Martin F. 2011. A secreted effector protein of Laccaria bicolor is required for symbiosis development. Current Biology 21: 1197–1203.
Zhao J, Yang F, Feng J, Wang Y, Lachenbruch B, Wang J, Wan X. Genome-Wide Constitutively Expressed Gene Analysis and New Reference Gene Selection Based on Transcriptome Data: A Case Study from Poplar/Canker Disease Interaction. Front Plant Sci. 2017 Oct 31;8:1876.
